# Supplementary material for: Ultra-High-Density Genetic Maps of Jatropha curcas × Jatropha integerrima and Anchoring Jatropha curcas Genome Assembly Scaffolds
Source: MDPI journal article supplement (doi:10.3390/f14091907), 2023-09-19
Supplement: s1 [file s1]

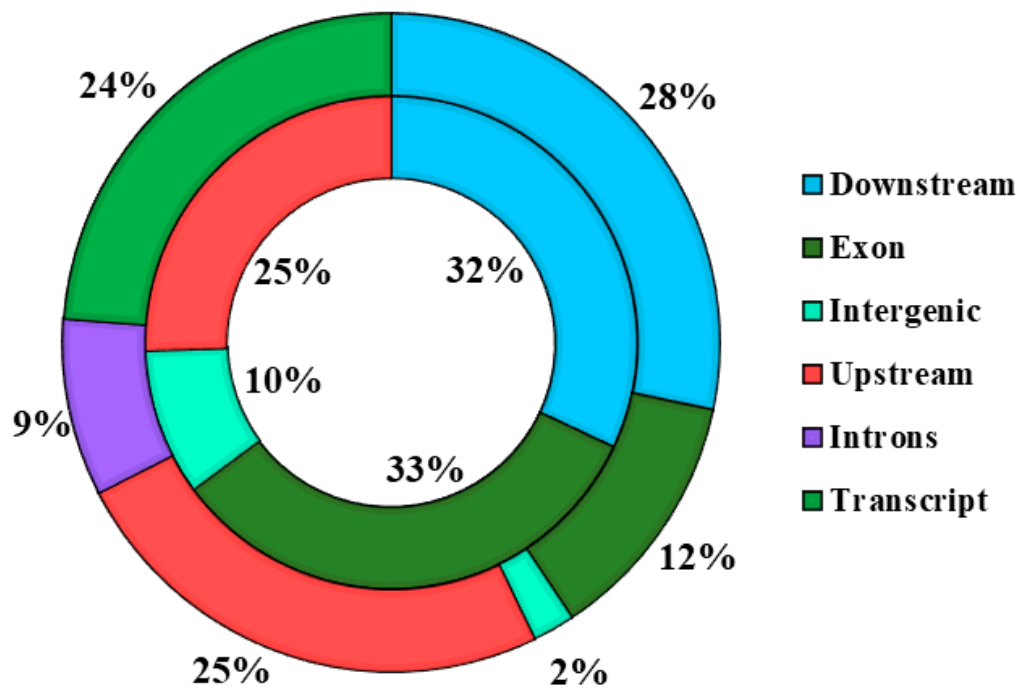

**Supplementary Figure S1.** A donut graph showing the distribution of SNPs in different regions of the Jat\_r4.5 (inner circle) and Wu\_JatCur\_1.0 (outer circle) genomes.
