# Supplementary material for: Ultra-High-Density Genetic Maps of Jatropha curcas × Jatropha integerrima and Anchoring Jatropha curcas Genome Assembly Scaffolds
Source: MDPI journal article supplement (doi:10.3390/f14091907), 2023-09-19
Supplement: s1 [file s1]

**Supplementary Table 1.** List of the oligonucleotide sequences of the barcode adapters used for Genotyping by Sequencing:

5'-ACACTCTTTCCCTACACGACGCTCTTCCGATCTxxxx and

5'-CWGyyyyAGATCGGAAGAGCGTCGTGTAGGGAAAGAGTGT

where “xxxx” denotes the barcodes AACAA, AACAAAGGT, AAGCGATA, AATGTCT, AATTCTGT, ACCGGTC, ACGTC, ACTAGGAA, ACTCCGC, ACTGCCA, AGACAAGT, AGACTGAA, AGATACGA, AGCAGATA, AGTCGTGT, AGTGGCTT, AGTTACT, ATATGTC, ATCTAGC, ATGACGC, ATGCACC, ATGCGT, ATTCAGT, ATTCAGTT, ATTGATC, CAACGCTT, CACGACT, CACGTT, CATAATGA, CATATGC, CATGTATT, CCACTGCA, CCGAGCT, CCGCCTAA, CGAGTAC, CGATC, CGATTAGA, CGCAACTT, CGGAGT, CGGCCGTA, CGGCTCA, CGGTAGC, CGTACC, CGTCTA, CTAGAGTA, CTCGA, CTGT, GACACCTT, GACACTC, GACTC, GACTCAAT, GAGTCGC, GCAGTTC, GCATCC, GCATTGGT, GCCTCCGA, GCGCGCAT, GCTGGATT, GCTTAGC, GCTTGA, GGATATC, GGCCGAGT, GGTACAC, GTATTAC, GTCAATAT, GTCTTA, GTGCCAC, GTGGCTAT, GTGTCAGT, GTTAGC, GTTATTC, TAAC, TACAGGAT, TACGTAA, TAGTACT, TATAGTC, TATGTAC, TATTGCA, TCATGAC, TCCACGC, TCCAGT, TCCGATAT, TCCGTA, TCGGAT, TCGGTTGA, TCTTAGGT, TGAAGCAA, TGAATTC, TGAGCGC, TGGACCT, TTAGTCGA, TTCGCCA, TTCGGAC, TTCTTGGA, TTGACAAT, TTGATAC, and “yyyy” denotes the complements of the respective barcodes. The common ApeKI adapter was prepared by annealing the oligos 5'-CWGAGATCGGAAGAGCGGTTCAGCAGGAATGCCGAG and

5'-CTCGGCATTCCTGCTGAACCGCTCTTCCGATCT as described by Elshire et al. [26].
