# Supplementary material for: Ultra-High-Density Genetic Maps of Jatropha curcas × Jatropha integerrima and Anchoring Jatropha curcas Genome Assembly Scaffolds
Source: MDPI journal article supplement (doi:10.3390/f14091907), 2023-09-19
Supplement: s1 [file s1]

Archive with 11 entries (11 files):
- Supplementary Figure S1.pdf
- Supplementary Figure S2.pdf
- Supplementary Figure S3.pdf
- Supplementary Table S1.pdf
- Supplementary Table S2_Jat_r4.5 Scaffold SNP Genotype Average.xlsx
- Supplementary Table S3_Jat_r4.5 Scaffold Genotype.xlsx
- Supplementary Table S4_Map Positions of Markers and SNPs Per Scaffold Jat_r4.5_JatCur_1.0.xlsx
- Supplementary Table S5_JatCur_1.0 Scaffold Genotype Average.xlsx
- Supplementary Table S6_JatCur_1.0 Scaffolds Genotype.xlsx
- Supplementary Table S7_Consistency of markers and LGs.xlsx
- Supplementary Table S8.pdf
