# Supplementary material for: Ultra-High-Density Genetic Maps of Jatropha curcas × Jatropha integerrima and Anchoring Jatropha curcas Genome Assembly Scaffolds
Source: MDPI journal article supplement (doi:10.3390/f14091907), 2023-09-19
Supplement: s1 [file s1 › Supplementary Figure S3.pdf]

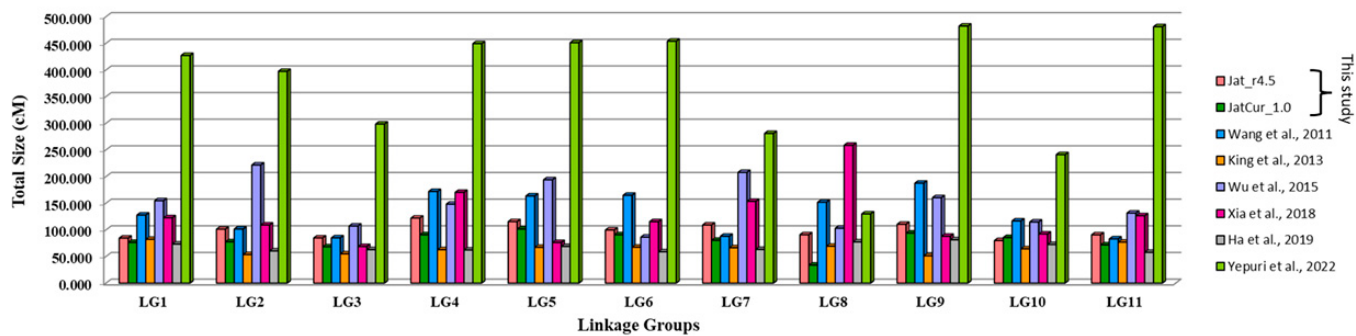

**Supplementary Figure S3.** A comparative histogram showing the size of individual linkage groups in cM from previously published studies and this study.
