# Supplementary material for: Ultra-High-Density Genetic Maps of Jatropha curcas × Jatropha integerrima and Anchoring Jatropha curcas Genome Assembly Scaffolds
Source: MDPI journal article supplement (doi:10.3390/f14091907), 2023-09-19
Supplement: s1 [file s1 › Supplementary Table S2_Jat_r4.5 Scaffold SNP Genotype Average.xlsx]

## Sheet: Jat_r4.5 Scaffolds SNP Genotype
Supplementary Table S2. The average Jat_r4.5 scaffold SNP genotype value calculation. While constructing linkage map, scaffolds with an average below 0.5 were categorized as "a," indicating a lower value, while those with an average above 0.5 were labeled as "h," representing a higher value. Any scaffolds with an average of exactly 0.5 were treated as missing data.
Scaffold	BC1_01:C4Y4MACXX:5:250355260	BC1_02:C4Y4MACXX:5:250355261	BC1_03:C4Y4MACXX:5:250355262	BC1_04:C4Y4MACXX:5:250355263	BC1_05:C4Y4MACXX:5:250355264	BC1_06:C4Y4MACXX:5:250355265	BC1_07:C4Y4MACXX:5:250355266	BC1_08:C4Y4MACXX:5:250355267	BC1_09:C4Y4MACXX:5:250355268	BC1_10:C4Y4MACXX:5:250355269	BC1_11:C4Y4MACXX:5:250355270	BC1_12:C4Y4MACXX:5:250355271	BC1_13:C4Y4MACXX:5:250355272	BC1_14:C4Y4MACXX:5:250355273	BC1_15:C4Y4MACXX:5:250355274	BC1_16:C4Y4MACXX:5:250355275	BC1_17:C4Y4MACXX:5:250355276	BC1_18:C4Y4MACXX:5:250355277	BC1_19:C4Y4MACXX:5:250355278	BC1_20:C4Y4MACXX:5:250355279	BC1_21:C4Y4MACXX:5:250355280	BC1_22:C4Y4MACXX:5:250355281	BC1_23:C4Y4MACXX:5:250355282	BC1_24:C4Y4MACXX:5:250355283	BC1_25:C4Y4MACXX:5:250355284	BC1_26:C4Y4MACXX:5:250355285	BC1_27:C4Y4MACXX:5:250355286	BC1_28:C4Y4MACXX:5:250355287	BC1_29:C4Y4MACXX:5:250355288	BC1_30:C4Y4MACXX:5:250355289	BC1_32:C4Y4MACXX:5:250355290	BC1_33:C4Y4MACXX:5:250355291	BC1_34:C4Y4MACXX:5:250355292	BC1_35:C4Y4MACXX:5:250355293	BC1_36:C4Y4MACXX:5:250355294	BC1_37:C4Y4MACXX:5:250355295	BC1_38:C4Y4MACXX:5:250355296	BC1_42:C4Y4MACXX:5:250355297	BC1_43:C4Y4MACXX:5:250355298	BC1_44:C4Y4MACXX:5:250355299	BC1_45:C4Y4MACXX:5:250355300	BC1_46:C4Y4MACXX:5:250355301	BC1_47:C4Y4MACXX:5:250355302	BC1_48:C4Y4MACXX:5:250355303	BC1_49:C4Y4MACXX:5:250355304	BC1_50:C4Y4MACXX:5:250355305	BC1_51:C4Y4MACXX:5:250355306	BC1_52:C4Y4MACXX:5:250355307	BC1_53:C4Y4MACXX:5:250355308
S1	1	0	1	1	1	0	0	0	1	0	0	0	1	1	1	0	0	0	0	0	0	1	1	1	0	0	0	0	0	0	0	-	0	0	1	1	0	1	1	0	0	1	1	0	0	0	-	1	0
S1	1	0	1	1	1	1	0	0	0	0	0	0	1	1	1	0	0	0	0	0	0	1	0	1	1	0	0	0	1	0	0	0	0	0	0	1	0	1	0	0	0	0	1	0	0	0	0	1	1
S1	1	0	1	1	1	1	0	0	1	0	0	0	1	1	1	0	0	0	0	0	0	1	0	0	1	0	0	0	0	0	0	-	0	-	1	1	0	1	1	0	-	1	1	0	0	0	0	1	1
S1	1	0	1	1	1	1	0	0	0	0	0	0	1	1	1	0	0	0	0	0	0	0	1	0	1	0	0	0	0	0	0	0	0	0	1	1	0	1	1	0	-	0	1	0	0	0	0	-	0
S1	1	0	1	1	1	1	0	0	1	0	0	0	1	1	1	0	0	0	0	0	0	1	1	1	0	0	0	0	1	0	0	0	0	0	1	1	0	1	1	-	0	1	0	0	0	0	1	1	1
S1	1	0	1	1	1	1	0	0	1	0	0	0	1	1	1	0	0	0	0	0	0	1	1	1	1	0	0	0	1	0	0	0	0	0	1	1	0	1	1	0	0	1	1	0	0	0	0	1	1
S1	1	0	1	1	1	1	0	0	1	0	0	0	1	1	1	0	0	0	0	0	0	1	1	1	1	0	0	0	1	0	0	1	0	0	1	1	0	1	1	0	0	1	1	0	0	0	1	1	1
S1	1	0	1	1	1	1	0	0	1	0	0	0	1	1	1	0	0	0	0	0	0	1	1	1	1	0	0	0	1	0	0	1	0	0	1	1	0	1	1	0	0	1	1	0	0	0	1	1	1
S1	1	0	1	1	1	0	0	0	1	0	0	0	1	1	1	0	0	0	0	0	0	1	1	1	1	0	0	0	1	0	0	-	0	0	1	1	0	1	1	0	0	1	1	0	0	0	1	1	1
S1	1	1	0	-	1	-	0	1	1	1	1	-	0	0	-	1	-	0	1	0	0	1	1	0	0	1	1	1	1	0	0	-	1	0	0	1	1	1	1	0	0	1	1	0	1	1	-	-	0
S1	1	1	0	-	1	-	0	1	1	1	1	-	0	0	-	1	-	0	1	0	0	1	1	0	0	1	1	1	1	0	0	-	1	0	0	1	1	1	1	0	0	1	1	0	1	1	-	-	0
S1	1	0	1	1	1	1	0	0	1	0	0	0	1	1	1	0	0	0	0	0	0	1	1	1	1	0	0	0	1	0	0	1	0	0	1	1	0	1	1	1	0	1	1	0	0	0	1	1	1
S1	1	0	1	1	1	1	0	0	1	0	0	0	1	1	1	0	0	0	0	0	0	1	1	1	1	0	0	0	1	0	0	1	0	0	1	1	0	1	1	1	0	1	1	0	0	0	1	1	1
S1	1	1	1	0	1	0	-	0	1	1	1	-	1	0	0	0	-	0	1	1	1	1	0	1	0	0	1	1	0	-	1	0	0	-	1	0	0	-	0	0	-	0	0	1	1	1	-	0	0
S1	1	1	1	0	1	0	-	0	1	1	1	-	1	0	0	0	-	0	1	1	1	1	0	1	0	0	1	1	0	-	1	0	0	-	1	0	0	-	0	0	-	0	0	1	1	1	-	0	0
S1	1	1	1	0	1	0	-	0	1	1	1	-	1	0	0	0	-	0	1	1	1	1	0	1	0	0	1	1	0	-	1	0	0	-	1	0	0	-	0	0	-	0	0	1	1	1	-	0	0
S1	0	0	0	0	1	0	1	0	-	1	1	-	1	1	1	1	1	1	0	0	1	0	0	-	0	0	1	1	-	1	0	-	0	-	1	1	0	1	0	-	0	0	1	0	0	0	0	0	1
S1	0	0	0	0	1	0	1	0	-	1	1	-	1	1	1	1	1	1	0	0	1	0	0	-	0	0	1	1	-	1	0	-	0	-	1	1	0	1	0	-	0	0	1	0	0	0	0	0	1
S1	0	1	-	1	0	-	0	1	1	0	1	-	0	-	0	1	0	0	1	1	1	1	-	0	-	1	1	1	0	0	1	-	0	1	1	1	1	1	0	-	0	0	0	1	0	1	-	0	0
S1	1	0	1	1	1	1	0	0	1	0	0	0	1	1	1	0	0	0	0	0	0	1	1	1	1	0	0	0	1	0	0	1	0	0	1	1	0	1	1	1	0	1	1	0	0	0	1	1	1
S1	0	0	1	1	1	1	0	0	1	0	0	0	1	1	1	0	0	0	0	0	0	1	1	1	1	0	0	0	1	0	0	0	0	0	1	1	0	1	1	-	0	1	1	0	0	0	0	1	1
S1	0	0	1	1	1	1	0	0	1	0	0	0	1	1	1	0	0	0	0	0	0	1	1	1	1	0	0	0	1	0	0	0	0	0	1	1	0	1	1	-	0	1	1	0	0	0	0	1	1
S1	1	0	1	1	1	-	0	0	1	0	0	0	1	1	0	0	0	-	0	0	0	1	1	1	1	0	0	0	1	0	0	0	0	0	1	1	0	1	1	0	0	0	1	0	0	0	1	1	1
S1	1	0	1	1	1	1	0	0	1	0	0	0	1	1	0	0	0	0	0	0	0	1	1	1	0	0	0	0	1	0	0	0	0	0	1	1	0	1	1	0	0	0	1	0	0	0	0	1	1
S1	1	0	1	1	1	1	0	0	1	0	0	0	1	1	0	0	0	0	0	0	0	1	1	1	0	0	0	0	1	0	0	0	0	0	1	1	0	1	1	0	0	0	1	0	0	0	0	1	1
S1	1	0	1	1	1	1	0	0	1	0	0	0	1	1	1	0	0	0	0	0	0	1	1	1	1	0	0	0	1	0	0	1	0	0	1	1	0	1	1	-	0	1	1	0	0	0	1	1	1
S1	1	0	1	1	1	1	0	0	1	0	0	1	1	1	1	0	0	0	0	0	0	1	1	1	1	0	0	0	1	0	0	1	0	0	1	1	0	1	1	0	0	1	1	0	0	0	1	1	1
S1	1	0	1	1	1	1	0	0	1	0	0	0	1	1	1	0	0	0	0	0	0	1	1	1	1	0	0	0	1	0	0	1	0	0	1	1	0	1	1	1	0	1	1	0	0	0	1	1	1
S1	1	0	1	1	1	1	0	0	1	0	0	0	1	1	1	0	0	0	0	0	0	1	1	1	1	0	0	0	1	0	0	1	0	0	1	1	0	1	1	1	0	1	1	0	0	0	1	1	1
S1	1	0	1	1	1	1	0	0	1	0	0	0	1	1	1	0	0	0	0	0	0	1	1	1	1	0	0	0	1	0	0	1	0	0	1	1	0	1	1	0	0	1	1	0	0	0	1	1	1
S1 Average	0.833333	0.2	0.862069	0.821429	0.966667	0.730769	0.0740741	0.1	0.928571	0.233333	0.266667	0.0454545	0.9	0.827586	0.75	0.166667	0.08	0.0689655	0.2	0.133333	0.2	0.9	0.758621	0.821429	0.62069	0.1	0.266667	0.266667	0.75	0.0740741	0.133333	0.454545	0.0666667	0.0416667	0.9	0.9	0.1	1	0.766667	0.217391	0	0.633333	0.833333	0.133333	0.166667	0.2	0.565217	0.777778	0.733333
S2	1	0	0	0	1	0	1	0	1	0	0	1	0	0	0	1	0	0	0	0	1	1	0	0	1	1	1	1	1	1	0	1	1	0	0	0	0	1	0	1	0	0	0	1	0	0	1	0	1
S2	1	0	0	0	1	0	1	0	1	0	0	1	0	0	0	1	0	0	0	0	1	1	0	0	1	1	1	1	1	1	0	1	1	0	0	0	0	1	0	0	0	0	0	1	0	0	1	0	1
S2	1	0	0	0	1	0	1	0	1	0	0	1	0	0	0	1	0	0	0	0	1	1	0	0	1	1	1	1	1	1	0	-	1	0	0	0	0	0	0	0	0	0	0	1	0	0	1	0	1
S2	1	0	0	0	1	0	1	0	1	0	0	0	0	0	0	1	0	0	0	0	1	1	0	0	0	1	1	1	1	0	0	1	1	0	0	0	0	1	0	1	0	0	0	1	0	0	0	0	1
S2	1	0	0	0	1	0	1	0	1	0	0	1	0	0	0	1	0	0	0	0	1	1	0	0	1	1	1	1	1	1	0	0	1	0	0	0	0	1	0	0	0	0	0	1	0	0	1	0	1
S2	1	0	0	0	1	0	1	0	1	0	0	1	0	0	0	1	0	0	0	0	1	1	0	0	1	1	1	1	1	1	0	0	1	0	0	0	0	1	0	0	0	0	0	1	0	0	1	0	1
S2	1	0	0	0	1	0	1	0	1	0	0	1	0	0	0	1	0	0	0	0	1	1	0	0	1	1	1	1	1	1	0	0	1	0	0	0	0	1	0	0	0	0	0	1	0	0	1	0	1
S2	1	0	0	0	1	0	1	0	1	0	0	1	0	0	0	1	0	0	0	0	1	1	0	0	1	1	1	1	1	1	0	0	1	0	0	0	0	1	0	0	0	0	0	1	0	0	1	0	1
S2	1	0	0	0	1	0	1	0	1	0	0	1	0	0	0	1	0	0	0	0	1	1	0	0	1	1	1	1	1	1	0	-	0	0	0	0	0	1	0	-	0	0	0	1	0	0	0	0	1
S2	1	0	0	0	1	0	1	0	1	0	0	1	0	0	0	1	-	0	0	0	1	1	0	0	1	1	1	1	1	0	0	0	1	0	0	0	0	0	0	0	0	0	0	1	0	0	1	0	1
S2	1	0	0	0	1	0	1	0	1	0	0	0	0	0	0	0	0	0	0	0	1	1	0	0	1	1	1	1	1	1	0	1	1	0	0	0	0	1	0	-	0	0	0	1	0	0	0	0	1
S2	1	0	0	0	1	0	1	0	1	0	0	0	0	0	0	0	0	0	0	0	1	1	0	0	1	1	1	1	1	1	0	1	1	0	0	0	0	1	0	-	0	0	0	1	0	0	0	0	1
S2	1	0	0	0	1	-	1	0	1	0	0	1	0	0	0	1	0	0	0	0	1	1	0	0	1	1	1	1	1	1	0	1	1	0	0	0	0	1	0	0	-	0	0	1	0	0	0	0	1
S2	1	0	0	0	1	-	1	0	1	0	0	1	0	0	0	1	0	0	0	0	1	1	0	0	1	1	1	1	1	1	0	1	1	0	0	0	0	1	0	0	-	0	0	1	0	0	0	0	1
S2	1	0	0	0	1	-	1	0	1	0	0	1	0	0	0	1	0	0	0	0	1	1	0	0	1	1	1	1	1	1	0	1	1	0	0	0	0	1	0	0	-	0	0	1	0	0	0	0	1
S2	1	0	0	0	1	0	0	0	1	0	0	1	0	0	0	1	0	0	0	0	1	1	0	0	1	1	1	1	1	1	0	0	1	0	0	0	0	1	0	0	0	0	0	1	0	0	0	0	1
S2	1	0	0	0	1	0	1	0	1	0	0	1	0	0	0	1	0	0	0	0	1	1	0	0	1	1	1	1	1	1	0	1	1	0	0	0	0	1	0	1	0	0	0	1	0	0	1	0	1
S2	1	0	0	0	1	0	1	0	1	0	0	1	0	0	0	1	0	0	0	0	1	1	0	0	1	1	1	1	1	1	0	1	1	-	0	0	0	1	0	-	0	0	0	1	0	0	1	0	1
S2	1	0	0	0	1	0	1	0	1	0	0	1	0	0	0	1	0	0	0	0	1	1	0	0	1	1	1	1	1	1	0	1	1	0	0	0	0	1	0	1	0	0	0	1	0	0	1	0	1
S2	1	0	0	0	1	0	1	0	1	0	0	1	0	0	0	1	0	0	0	0	1	1	0	0	1	1	1	1	1	1	0	1	1	0	0	0	0	1	0	0	-	0	0	1	0	0	1	0	1
S2	1	0	0	0	1	0	1	0	1	0	0	1	0	0	0	1	0	0	0	0	1	1	0	0	1	1	1	1	1	1	0	1	1	0	0	0	0	1	0	1	-	0	0	1	0	0	1	0	1
S2	1	0	0	0	1	-	1	0	1	0	0	1	0	0	0	1	0	0	0	0	1	1	0	0	1	1	1	1	1	1	0	1	1	0	0	0	0	1	0	-	0	0	0	1	0	0	1	0	1
S2	1	0	0	0	1	0	1	0	1	0	0	1	0	0	0	1	0	0	0	0	1	1	0	0	1	1	1	1	1	1	0	1	1	0	0	0	0	1	0	0	0	0	0	0	0	0	0	0	1
S2	1	0	0	0	1	0	1	0	1	0	0	1	0	0	0	1	0	0	0	0	1	1	0	0	1	1	1	1	1	1	0	1	1	0	0	0	0	1	0	1	0	0	0	1	0	0	1	0	1
S2	1	0	0	0	1	0	1	0	1	0	0	1	0	0	0	1	0	0	0	0	1	1	0	0	1	1	1	1	1	1	0	1	1	0	0	0	0	1	0	0	0	0	0	1	0	0	1	0	1
S2	1	0	0	0	1	0	1	0	1	0	0	1	0	0	0	1	0	0	0	0	1	1	0	0	1	1	1	1	1	1	0	1	1	0	0	0	0	1	0	1	0	0	0	1	0	0	1	0	1
S2	1	0	0	0	1	0	1	0	1	0	0	1	0	0	0	1	0	0	0	0	1	1	0	0	1	1	1	1	1	1	0	1	1	0	0	0	0	1	0	1	0	0	0	1	0	0	1	0	1
S2	1	0	0	0	1	0	1	0	1	0	0	1	0	0	0	1	0	0	0	0	1	1	0	0	1	0	1	1	1	1	0	1	1	0	0	0	0	1	0	1	0	0	0	1	0	0	0	0	1
S2	1	0	0	0	1	0	1	0	1	0	0	1	0	0	0	1	0	0	0	0	1	1	0	0	1	0	1	1	1	1	0	1	1	0	0	0	0	1	0	1	0	0	0	1	0	0	0	0	1
S2	1	0	0	0	1	0	1	0	1	0	0	1	0	0	0	1	0	0	0	0	1	1	0	0	1	0	1	1	1	1	0	1	1	0	0	0	0	1	0	1	0	0	0	1	0	0	0	0	1
S2	1	0	0	0	1	0	1	0	1	0	0	1	0	0	0	1	0	0	0	0	1	1	0	0	1	1	1	1	1	1	0	-	1	0	0	0	0	1	0	1	0	0	0	1	0	0	-	0	1
S2	1	0	0	0	1	0	1	0	1	0	0	1	0	0	0	1	0	0	0	0	1	1	0	0	1	1	1	1	1	1	0	-	1	0	0	0	0	1	0	1	0	0	0	1	0	0	-	0	1
S2	1	0	0	0	1	0	1	0	1	0	0	0	0	0	0	1	0	0	0	0	1	1	0	0	0	1	1	1	1	1	0	0	1	0	0	0	0	1	0	1	0	0	0	1	0	0	0	0	1
S2	1	0	0	0	1	0	1	0	1	0	0	0	0	0	0	1	0	0	0	0	1	1	0	0	0	1	1	1	1	1	0	0	1	0	0	0	0	1	0	1	0	0	0	1	0	0	0	0	1
S2	0	1	0	0	0	0	1	0	1	1	0	1	0	1	1	0	1	1	1	0	0	0	0	1	0	1	0	0	0	0	0	0	0	0	0	0	1	1	0	0	0	1	0	0	1	0	1	0	1
S2	0	1	0	0	0	0	1	0	1	1	0	1	0	1	1	0	1	1	1	0	0	0	0	1	0	1	0	0	0	0	0	0	0	0	0	0	1	1	0	0	0	1	0	0	1	0	1	0	1
S2	0	1	0	0	0	0	1	0	1	1	0	1	0	1	1	0	1	1	1	0	0	0	0	1	0	1	0	0	0	0	0	0	0	0	0	0	1	1	0	0	0	1	0	0	1	0	1	0	1
S2 Average	0.918919	0.0810811	0	0	0.918919	0	0.972973	0	1	0.0810811	0	0.864865	0	0.0810811	0.0810811	0.864865	0.0833333	0.0810811	0.0810811	0	0.918919	0.918919	0	0.0810811	0.837838	0.918919	0.918919	0.918919	0.918919	0.864865	0	0.666667	0.891892	0	0	0	0.0810811	0.945946	0	0.46875	0	0.0810811	0	0.891892	0.0810811	0	0.6	0	1
S3	0	0	1	1	1	1	0	0	1	0	0	0	1	1	1	0	0	0	0	0	0	1	1	1	1	0	0	0	1	0	0	1	0	0	1	1	0	1	1	0	0	1	1	0	0	0	1	1	1
S3	0	0	1	1	1	1	0	0	1	0	0	0	1	1	1	0	0	0	0	0	0	1	1	1	1	0	0	0	1	0	0	1	0	0	1	1	0	1	1	1	0	1	1	0	0	0	1	1	1
S3	0	0	1	1	1	1	0	0	1	0	0	0	1	1	1	0	0	0	0	0	0	1	1	1	1	0	0	0	1	0	0	1	0	0	1	1	0	1	1	1	0	1	1	0	0	0	1	1	1
S3	0	0	1	1	1	1	0	0	1	0	0	0	1	0	1	0	0	0	0	0	0	1	1	1	0	0	0	0	1	0	0	1	0	0	1	1	0	1	1	0	0	0	1	0	0	0	1	1	1
S3	0	0	1	1	1	1	0	0	1	0	0	0	1	1	1	0	0	0	0	0	0	1	1	1	1	0	0	0	1	0	0	1	0	0	1	1	0	1	1	1	0	1	1	0	0	0	1	1	1
S3	0	0	1	1	1	1	0	0	1	0	0	0	1	1	1	0	0	0	0	0	0	1	1	1	1	0	0	0	1	0	0	1	0	0	1	1	0	1	1	1	0	1	1	0	0	0	1	1	1
S3	0	0	1	1	1	1	0	0	1	0	0	0	1	1	1	0	0	0	0	0	0	1	1	1	1	0	0	0	1	0	0	1	0	0	1	1	0	1	1	1	0	1	1	0	0	0	1	1	1
S3	0	0	1	1	1	0	0	0	1	0	0	0	1	1	-	0	0	0	0	0	0	1	1	1	1	0	0	0	1	0	0	1	0	0	1	1	0	1	1	0	0	1	1	0	0	0	1	0	1
S3	0	0	1	1	1	0	0	0	1	0	0	0	1	1	-	0	0	0	0	0	0	1	1	1	1	0	0	0	1	0	0	1	0	0	1	1	0	1	1	0	0	1	1	0	0	0	1	0	1
S3	0	0	1	1	1	0	0	0	1	0	0	0	1	0	0	0	0	0	0	0	0	1	1	0	0	0	0	0	1	0	0	1	0	0	1	1	0	1	1	-	-	1	1	0	0	0	0	1	1
S3	0	0	1	1	1	1	0	0	1	0	0	0	1	1	1	0	0	0	0	0	0	1	1	1	1	0	0	0	1	0	0	1	0	0	1	1	0	1	1	1	0	0	1	0	0	0	1	1	1
S3	0	0	1	1	1	1	0	0	1	0	0	0	1	1	1	0	0	0	0	0	0	1	1	1	1	0	0	0	1	0	0	0	0	0	1	1	0	1	1	0	0	1	1	0	0	0	1	1	1
S3	0	0	1	1	1	0	0	0	1	0	0	0	1	1	1	0	0	0	0	0	0	0	1	1	1	0	0	0	1	0	0	1	0	0	1	1	0	1	1	0	0	1	1	0	0	0	0	1	1
S3	0	0	1	1	1	1	0	0	0	0	0	0	1	1	1	0	0	0	0	0	0	0	1	0	1	0	0	0	0	0	1	0	0	0	1	1	0	1	1	0	0	0	1	0	0	0	0	0	0
S3	0	0	1	1	1	1	0	0	1	0	0	0	1	1	1	0	0	0	0	0	0	1	1	1	1	0	0	0	1	0	1	1	0	0	1	1	0	1	1	1	0	1	1	0	0	0	1	1	1
S3	0	0	1	1	1	1	0	0	1	0	0	0	1	1	1	0	0	0	0	0	0	1	1	1	1	0	0	0	1	0	1	1	0	0	1	1	0	1	1	1	0	1	1	0	0	0	1	1	1
S3	0	0	1	1	1	0	0	0	1	0	0	0	1	1	1	0	0	0	0	0	0	1	1	1	1	0	0	0	1	0	1	1	0	0	1	1	0	1	1	1	0	1	1	0	0	0	1	1	1
S3	0	0	1	1	1	0	0	0	0	0	0	0	1	1	1	0	0	0	0	0	0	0	1	0	1	0	0	0	0	0	1	0	0	0	1	1	0	1	1	0	0	0	1	0	0	0	0	0	0
S3	0	0	1	1	1	1	0	0	1	0	0	0	1	1	1	0	0	0	0	0	0	1	1	1	0	0	0	0	0	0	1	0	0	0	1	1	0	1	0	-	0	1	1	0	0	0	-	0	1
S3	0	0	1	1	1	0	0	0	1	0	0	0	1	1	0	0	0	0	0	0	0	1	0	1	1	0	0	0	1	0	1	0	0	0	1	1	0	1	1	0	0	1	1	0	0	0	-	0	1
S3	0	0	1	1	1	1	0	0	1	0	0	0	1	1	1	0	0	0	0	0	0	1	1	1	1	0	0	0	1	0	1	1	0	0	1	1	0	1	1	1	0	1	1	0	0	0	1	1	1
S3	0	0	1	1	1	1	0	0	1	0	0	0	1	1	1	0	0	0	0	0	0	1	1	1	1	0	0	0	1	0	1	1	0	0	1	1	0	1	1	1	0	1	1	0	0	0	1	1	1
S3	0	0	1	1	1	1	0	0	1	0	0	0	1	1	1	0	0	0	0	0	0	1	1	1	1	0	0	0	1	0	1	1	0	0	1	1	0	1	1	1	0	1	1	0	0	0	1	1	1
S3	0	0	1	1	1	1	0	0	1	0	0	0	1	1	0	0	0	0	0	0	0	0	1	1	1	0	0	0	0	0	1	1	0	0	1	1	0	1	0	0	0	1	1	0	0	0	0	1	1
S3 Average	0	0	1	1	1	0.708333	0	0	0.916667	0	0	0	1	0.916667	0.863636	0	0	0	0	0	0	0.833333	0.958333	0.875	0.875	0	0	0	0.833333	0	0.458333	0.791667	0	0	1	1	0	1	0.916667	0.545455	0	0.833333	1	0	0	0	0.772727	0.75	0.916667
S4	1	0	0	0	1	0	1	0	1	1	1	1	0	0	0	1	0	-	0	0	1	1	0	0	1	1	1	1	1	0	0	0	1	0	0	0	0	1	0	-	0	0	0	1	0	0	1	0	0
S4	1	0	0	0	1	0	1	0	1	1	1	1	0	0	0	1	0	-	0	0	1	1	0	0	1	1	1	1	1	0	0	0	1	0	0	0	0	1	0	-	0	0	0	1	0	0	1	0	0
S4	1	1	1	1	1	0	1	1	0	1	1	1	0	1	1	1	1	-	1	1	1	0	1	1	1	1	1	1	0	1	0	0	1	1	1	0	0	1	1	-	1	1	1	0	1	0	1	1	1
S4	1	0	0	0	1	0	1	0	1	0	1	1	0	0	0	1	0	0	0	0	1	1	0	0	1	1	1	1	1	0	0	-	1	0	0	0	0	1	0	0	-	0	0	1	0	0	1	0	1
S4	1	0	0	0	1	0	1	0	1	1	1	1	0	0	0	1	0	0	0	0	1	1	0	0	1	1	1	1	1	1	0	0	1	0	0	0	0	1	0	1	0	0	0	1	0	0	1	0	1
S4	1	0	0	0	1	0	1	0	1	1	1	1	0	0	0	1	0	0	0	0	1	1	0	0	1	1	1	1	1	1	0	0	1	0	0	0	0	1	0	1	0	0	0	1	0	0	1	0	1
S4	1	0	0	0	1	0	1	0	1	1	1	1	0	0	0	1	0	0	0	0	1	1	0	0	1	1	1	1	1	1	0	1	1	0	0	0	0	1	0	1	0	0	0	1	0	0	1	0	1
S4	1	0	0	0	1	0	1	0	1	1	1	1	0	0	0	1	0	0	0	0	1	1	0	0	1	1	1	1	1	1	0	0	1	0	0	0	0	1	0	1	0	0	0	1	0	0	1	0	1
S4	1	0	1	0	1	1	1	0	1	0	0	0	1	1	0	0	0	0	0	0	1	1	1	1	1	0	0	0	1	0	0	1	0	1	0	0	0	1	1	1	0	1	1	0	0	0	1	1	1
S4	1	0	1	0	1	1	1	0	1	0	0	0	1	0	0	0	0	0	0	0	1	1	1	1	1	0	0	0	1	0	0	0	0	0	0	0	0	1	1	0	0	1	1	0	0	0	0	-	0
S4	1	0	1	0	1	1	1	0	1	0	0	0	1	0	0	0	0	0	0	0	1	1	1	1	1	0	0	0	1	0	0	0	0	0	0	0	0	1	1	0	0	1	1	0	0	0	0	-	0
S4	1	0	1	0	1	1	1	0	1	0	0	0	1	1	0	0	0	0	0	0	1	1	1	1	0	0	0	0	0	0	0	0	0	1	0	0	0	1	1	0	0	0	1	0	0	0	0	0	1
S4	0	0	0	0	1	0	1	0	0	0	0	0	1	1	0	0	0	0	0	0	1	1	1	1	1	0	0	0	1	0	0	1	0	1	0	0	0	1	1	0	-	0	1	0	0	0	0	-	1
S4	0	0	0	0	1	0	1	0	0	0	0	0	1	1	0	0	0	0	0	0	1	1	1	1	1	0	0	0	1	0	0	1	0	1	0	0	0	1	1	0	-	0	1	0	0	0	0	-	1
S4	1	0	1	0	1	1	1	0	1	0	0	0	1	1	0	0	0	0	0	0	1	1	1	1	1	0	0	0	1	0	0	1	0	1	0	0	0	1	1	1	0	1	1	0	0	0	1	1	1
S4	1	0	1	0	1	1	1	0	1	0	0	0	1	1	0	0	0	0	0	0	1	1	1	1	1	0	0	0	1	0	0	1	0	1	0	0	0	1	1	1	0	1	1	0	0	0	1	1	1
S4	1	0	1	0	1	1	1	0	1	0	0	0	1	0	0	0	0	0	0	0	1	1	1	1	0	0	0	0	1	0	0	0	0	0	0	0	0	-	1	-	0	1	1	0	0	0	1	1	1
S4	1	0	1	0	1	1	1	0	1	0	0	0	1	1	0	0	0	0	0	0	1	1	1	1	1	0	0	0	1	0	0	1	0	1	0	0	0	1	1	1	0	1	1	0	0	0	0	1	1
S4	1	0	1	0	1	1	1	0	1	0	0	0	1	1	0	0	0	0	0	0	1	1	1	1	1	0	0	0	1	0	0	1	0	1	0	0	0	1	1	1	0	1	1	0	0	0	0	1	1
S4	1	0	1	0	1	1	1	0	1	0	0	0	1	1	0	0	0	0	0	0	1	1	1	1	1	0	0	0	1	0	0	1	0	1	0	0	0	1	1	1	0	1	1	0	0	0	1	1	1
S4	1	0	1	0	1	1	1	0	1	0	0	0	1	1	0	0	0	0	0	0	1	1	1	1	1	0	0	0	1	0	0	0	0	0	0	0	0	1	1	0	0	0	1	0	0	0	1	1	1
S4	1	0	1	0	1	1	1	0	1	0	0	0	1	1	0	0	0	0	0	0	1	0	1	0	1	0	0	0	1	0	0	-	0	1	0	0	0	1	1	-	0	1	1	0	0	0	0	1	1
S4	1	0	1	0	1	1	0	0	1	0	0	0	1	1	0	0	0	0	0	0	1	1	0	1	1	0	0	0	1	0	0	1	0	1	0	0	0	1	1	0	0	1	1	0	0	0	1	1	1
S4	1	0	1	0	1	1	0	0	1	0	0	0	1	1	0	0	0	0	0	0	1	1	0	1	1	0	0	0	1	0	0	1	0	1	0	0	0	1	1	0	0	1	1	0	0	0	1	1	1
S4	1	0	1	0	1	1	1	0	0	0	0	0	1	1	0	0	0	0	0	0	1	1	1	1	1	0	0	0	1	0	0	1	0	-	0	0	0	0	1	0	0	1	1	0	0	0	1	1	1
S4	1	0	1	0	1	1	1	0	1	0	0	0	1	1	0	0	0	0	0	0	1	1	1	1	1	0	0	0	1	0	0	0	0	1	0	0	0	1	1	0	0	1	1	0	0	0	1	1	1
S4	1	0	1	0	1	1	1	0	1	0	0	0	1	1	0	0	0	0	0	0	1	1	1	1	1	0	0	0	1	0	0	1	0	1	0	0	0	1	1	0	0	0	1	0	0	0	1	1	1
S4	1	0	0	0	1	1	1	0	1	0	0	0	1	0	0	0	0	-	0	0	1	1	1	1	1	0	0	0	1	0	0	1	0	1	0	0	-	1	1	0	0	-	1	0	0	0	1	1	1
S4	1	0	0	0	1	1	1	0	1	0	0	0	1	0	0	0	0	-	0	0	1	1	1	1	1	0	0	0	1	0	0	1	0	1	0	0	-	1	1	0	0	-	1	0	0	0	1	1	1
S4	1	0	0	0	1	1	1	0	1	0	0	0	1	1	0	0	0	0	0	0	1	1	1	1	0	0	0	0	1	0	0	-	0	1	0	0	0	1	1	0	0	0	1	0	0	0	-	1	1
S4	1	0	0	0	1	1	1	0	1	0	0	0	1	1	0	0	0	0	0	0	1	1	1	1	0	0	0	0	1	0	0	-	0	1	0	0	0	1	1	0	0	0	1	0	0	0	-	1	1
S4	1	0	1	0	1	1	1	0	1	0	0	0	1	1	0	0	0	0	0	0	1	1	1	1	1	0	0	0	1	0	0	1	0	1	0	0	0	1	1	1	1	0	1	0	0	0	1	1	1
S4	1	0	1	0	1	1	1	0	1	0	0	0	1	1	0	0	0	0	0	0	1	1	1	1	1	0	0	0	1	0	0	1	0	1	0	0	0	1	1	1	1	0	1	0	0	0	1	1	1
S4 Average	0.939394	0.030303	0.606061	0.030303	1	0.69697	0.939394	0.030303	0.878788	0.212121	0.242424	0.242424	0.757576	0.636364	0.030303	0.242424	0.030303	0	0.030303	0.030303	1	0.939394	0.727273	0.757576	0.878788	0.242424	0.242424	0.242424	0.939394	0.151515	0	0.586207	0.242424	0.65625	0.030303	0	0	0.96875	0.787879	0.428571	0.1	0.483871	0.787879	0.212121	0.030303	0	0.741935	0.724138	0.878788
S5	0	1	0	0	0	0	0	0	0	1	0	1	0	1	1	0	1	1	1	0	1	0	0	0	0	1	0	0	0	0	0	1	1	1	0	0	0	1	0	0	0	0	0	0	1	0	1	0	1
S5	0	1	0	0	0	0	0	0	0	1	0	1	0	1	1	0	1	1	1	0	1	0	0	0	0	1	0	0	0	0	0	1	1	1	0	0	0	1	0	0	0	0	0	0	1	0	1	0	1
S5	0	1	0	0	0	0	0	0	0	1	0	1	0	1	1	0	1	1	1	0	1	0	0	0	0	1	0	0	0	0	0	1	1	1	0	0	0	1	0	0	0	1	0	0	1	0	1	0	1
S5	0	1	0	0	0	0	0	0	1	1	0	1	0	1	1	0	1	1	1	0	1	0	0	0	0	1	0	0	0	0	0	1	1	1	0	0	1	1	0	0	0	1	0	0	1	0	1	0	1
S5	0	1	0	0	0	0	0	0	1	1	0	1	0	1	1	0	1	1	1	0	1	0	0	0	0	1	0	0	0	0	0	1	1	1	0	0	1	1	0	0	0	1	0	0	1	0	1	0	1
S5	0	1	0	0	0	0	0	0	1	1	0	1	0	1	1	0	1	1	1	0	1	0	0	0	0	1	0	0	0	0	0	1	1	0	0	0	1	1	0	0	0	1	0	0	1	0	1	0	1
S5	0	1	0	0	0	0	0	0	1	1	0	1	0	1	0	0	1	-	1	0	1	0	0	0	0	1	0	0	0	0	0	-	1	1	0	0	1	1	0	0	0	1	0	0	1	0	1	0	1
S5	0	1	0	0	0	0	0	0	1	1	0	1	0	1	1	0	1	1	1	0	1	0	0	0	0	1	0	0	0	0	0	1	1	1	0	0	1	0	0	0	0	0	0	0	1	0	1	0	1
S5	0	1	0	0	0	0	0	0	1	1	0	1	0	1	1	0	1	1	1	0	1	0	0	0	0	1	0	0	0	0	0	1	1	1	0	0	1	1	0	0	0	1	0	0	1	0	1	0	1
S5	0	1	0	0	0	0	0	0	1	1	0	1	0	1	1	0	1	1	1	0	1	0	0	0	0	1	0	0	0	0	0	1	1	1	0	0	1	1	0	0	0	1	0	0	1	0	1	0	1
S5	0	1	0	0	0	0	0	0	1	1	0	1	0	1	1	0	1	1	1	0	1	0	0	0	0	1	0	0	0	0	0	1	1	1	0	0	1	1	0	-	0	0	0	0	1	0	1	0	1
S5	0	1	0	0	0	0	0	0	1	-	0	1	0	1	1	0	1	1	1	0	1	0	0	0	0	1	0	0	0	0	0	0	1	0	0	0	1	1	0	0	0	1	0	0	1	0	0	0	1
S5	0	1	0	0	0	0	0	0	1	1	0	1	0	1	1	0	1	1	1	0	1	0	0	0	0	1	0	0	0	0	0	1	0	1	0	0	1	1	0	0	0	1	0	0	0	0	0	0	1
S5	0	1	0	0	0	0	0	0	1	1	0	1	0	1	1	0	1	1	1	0	1	0	0	0	0	1	0	0	0	0	0	1	0	1	0	0	1	1	0	0	0	1	0	0	1	0	0	0	1
S5	0	1	0	0	0	0	0	0	1	1	0	1	0	1	1	0	1	1	1	0	1	0	0	0	0	1	0	0	0	0	0	1	0	1	0	0	1	1	0	0	0	1	0	0	1	0	0	0	1
S5	0	1	0	0	0	0	0	0	1	1	0	1	0	1	1	0	1	1	1	0	1	0	0	0	0	1	0	0	0	0	0	1	1	1	0	0	1	1	0	0	0	1	0	0	1	0	1	0	1
S5	0	1	0	0	0	0	0	0	1	1	0	0	0	1	0	0	1	0	1	0	1	0	0	0	0	1	0	0	0	0	0	1	1	0	0	0	1	1	0	-	0	1	0	0	1	0	0	0	0
S5	0	1	0	0	0	0	0	0	1	1	0	1	0	1	1	0	1	1	1	0	1	0	0	0	0	1	0	0	0	0	0	1	1	1	0	0	1	1	0	0	0	1	0	0	1	0	1	0	1
S5	0	1	0	0	0	0	0	0	1	1	0	1	0	1	1	0	1	1	1	0	1	0	0	0	0	1	0	0	0	0	0	1	1	1	0	0	1	1	0	0	0	1	0	0	1	0	1	0	1
S5	0	1	0	0	0	0	0	0	1	1	0	1	0	0	1	0	1	1	1	0	1	0	0	0	0	1	0	0	0	0	0	1	1	1	0	0	1	1	0	0	0	1	0	0	1	0	1	0	1
S5	0	1	0	0	0	0	0	0	1	1	0	1	0	1	1	0	1	1	1	0	1	0	0	0	0	1	0	0	0	0	0	1	1	1	0	0	1	1	0	0	0	1	0	0	1	0	1	0	1
S5	0	1	0	0	0	0	0	0	1	1	0	1	0	1	1	0	1	1	1	0	1	0	0	0	0	1	0	0	0	0	0	1	1	1	0	0	1	1	0	0	0	1	0	0	1	0	1	0	1
S5	0	1	0	0	0	0	0	0	1	1	0	1	0	1	1	0	1	1	1	0	1	0	0	0	0	1	0	0	0	0	0	1	1	1	0	0	1	1	0	0	0	1	0	0	1	0	1	0	1
S5	0	1	0	0	0	0	0	0	1	1	0	1	0	1	1	0	1	1	1	0	1	0	0	0	0	1	0	0	0	0	0	1	1	1	0	0	1	1	0	0	0	1	0	0	1	0	1	0	1
S5	0	1	0	0	0	0	0	0	1	1	0	1	0	1	1	0	1	1	1	0	1	0	0	0	0	1	0	0	0	0	0	1	1	1	0	0	1	1	0	1	0	1	0	0	1	0	1	0	1
S5	0	1	0	0	0	0	0	0	1	0	0	1	0	1	1	0	1	-	1	0	1	0	0	0	0	1	0	0	0	0	0	0	1	1	0	0	1	1	0	-	0	1	0	0	1	0	0	0	1
S5	0	1	0	0	0	0	0	0	1	0	0	1	0	1	1	0	1	-	1	0	1	0	0	0	0	1	0	0	0	0	0	0	1	1	0	0	1	1	0	-	0	1	0	0	1	0	0	0	1
S5 Average	0	1	0	0	0	0	0	0	0.888889	0.923077	0	0.962963	0	0.962963	0.925926	0	1	0.958333	1	0	1	0	0	0	0	1	0	0	0	0	0	0.884615	0.888889	0.888889	0	0	0.888889	0.962963	0	0.0434783	0	0.851852	0	0	0.962963	0	0.740741	0	0.962963
S6	1	0	0	0	1	0	1	0	1	1	1	1	0	0	0	1	0	0	0	0	1	0	0	0	1	1	1	1	1	1	1	1	1	0	0	0	0	1	0	1	0	0	0	1	0	0	1	0	1
S6	1	0	0	0	1	0	1	0	1	1	1	1	0	0	0	1	0	0	0	0	1	0	0	0	1	0	1	1	1	1	1	1	0	0	0	0	0	1	0	0	0	0	0	1	0	0	1	0	0
S6	1	0	0	0	1	0	1	0	1	1	1	1	0	0	0	1	0	0	0	0	0	0	0	0	1	1	1	1	1	1	1	1	0	0	0	0	0	1	0	0	0	0	0	1	0	0	1	0	1
S6	1	0	0	0	1	0	1	0	1	1	1	1	0	0	0	1	0	0	0	0	1	0	0	0	1	1	1	1	1	1	1	0	1	0	0	0	0	1	0	0	0	0	0	1	0	0	1	0	1
S6	1	0	0	0	1	0	1	0	1	1	1	1	0	0	0	1	0	0	0	0	1	0	0	0	1	1	1	1	1	1	1	0	1	0	0	0	0	1	0	0	0	0	0	1	0	0	1	0	1
S6	1	0	0	0	1	0	1	0	1	1	1	1	0	0	0	1	0	0	0	0	1	0	0	0	1	1	1	1	1	1	1	0	1	0	0	0	0	1	0	0	0	0	0	1	0	0	1	0	1
S6	1	0	0	0	1	0	1	0	1	0	1	1	0	0	0	1	0	0	0	0	1	0	0	0	1	1	1	1	1	1	1	1	1	0	0	0	0	1	0	-	-	0	0	1	0	0	1	0	1
S6	1	0	0	0	1	0	1	0	1	1	1	1	0	0	0	1	0	0	0	0	1	0	0	0	1	1	1	1	1	1	1	1	1	0	0	0	0	1	0	1	0	0	0	1	0	0	1	0	1
S6	1	0	0	0	1	0	1	0	1	1	1	1	0	0	0	1	0	0	0	0	1	0	0	0	1	1	1	1	1	1	1	1	1	0	0	0	0	1	0	1	0	0	0	1	0	0	1	0	1
S6	1	0	0	0	1	0	1	0	1	1	1	1	0	0	0	1	0	0	0	0	1	0	0	0	1	1	1	1	1	1	1	1	1	0	0	0	0	1	0	0	0	0	0	1	0	0	1	0	1
S6	0	0	1	1	0	1	0	-	0	1	0	1	0	1	1	1	1	0	0	0	0	1	0	-	0	1	0	1	0	1	1	-	0	0	0	0	0	0	0	-	-	0	0	1	0	1	0	0	0
S6	0	0	1	1	0	1	0	-	0	1	0	1	0	1	1	1	1	0	0	0	0	1	0	-	0	1	0	1	0	1	1	-	0	0	0	0	0	0	0	-	-	0	0	1	0	1	0	0	0
S6	0	0	1	1	0	1	1	0	0	0	0	1	0	1	0	1	0	0	0	0	0	1	0	0	0	1	0	1	0	1	1	0	1	0	0	0	0	0	0	1	-	0	0	1	1	1	1	0	0
S6	0	0	1	1	0	1	1	0	0	1	0	1	0	1	1	1	1	0	0	0	0	0	0	0	0	1	0	1	0	1	1	0	1	0	0	0	0	0	0	0	0	0	0	0	1	1	0	0	0
S6	0	0	1	1	0	1	1	0	0	1	0	1	0	1	1	1	1	0	0	0	0	1	0	0	0	1	0	1	0	1	1	1	1	0	0	0	0	0	0	0	0	0	0	1	1	1	0	0	0
S6	0	0	1	1	0	1	1	0	0	1	0	1	0	1	1	1	1	0	0	0	0	1	0	0	0	1	0	1	0	1	1	1	1	0	0	0	0	0	0	0	0	0	0	1	1	1	0	0	0
S6 Average	0.625	0	0.375	0.375	0.625	0.375	0.875	0	0.625	0.875	0.625	1	0	0.375	0.3125	1	0.3125	0	0	0	0.5625	0.3125	0	0	0.625	0.9375	0.625	1	0.625	1	1	0.642857	0.75	0	0	0	0	0.625	0	0.307692	0	0	0	0.9375	0.25	0.375	0.6875	0	0.5625
S7	1	1	0	1	0	0	1	0	1	0	0	0	0	1	0	0	1	0	1	0	0	1	0	0	1	0	1	1	1	0	0	1	1	0	0	0	1	1	0	0	0	0	0	1	1	0	0	0	1
S7	1	1	0	1	0	0	1	0	1	0	0	0	0	1	0	0	1	1	1	0	0	1	0	0	1	0	1	1	1	0	0	0	1	0	0	0	1	1	0	1	0	0	0	1	0	0	0	0	1
S7	1	1	0	1	0	0	1	0	1	0	0	0	0	1	0	0	1	1	1	0	0	1	0	0	1	0	1	1	1	0	0	1	1	0	0	0	1	1	0	1	1	0	0	1	1	0	0	0	1
S7	1	1	0	1	0	0	1	0	1	0	0	0	0	1	0	0	1	1	1	0	0	1	0	0	1	0	1	1	1	0	0	0	1	0	0	0	1	1	0	-	1	0	0	1	1	0	-	0	1
S7	1	1	0	1	0	0	1	0	1	0	0	0	0	1	0	0	1	1	1	0	0	1	0	0	1	0	1	1	1	0	0	1	1	0	0	0	1	1	0	1	1	0	0	1	1	0	0	0	1
S7	1	1	0	1	0	0	1	0	1	0	0	0	0	1	0	0	1	1	1	0	0	1	0	0	1	0	1	1	1	0	0	1	1	0	0	0	1	1	0	1	1	0	0	1	1	0	0	0	1
S7	1	1	0	1	0	0	1	0	1	0	0	0	0	1	0	0	1	1	1	0	0	1	0	0	1	0	1	1	1	0	0	1	1	0	0	0	1	1	0	1	1	0	0	1	1	0	0	0	1
S7	1	1	0	1	0	0	1	0	1	0	0	0	0	1	0	0	1	1	1	0	0	1	0	0	1	0	1	1	1	0	0	-	1	0	0	0	1	1	0	0	1	0	0	1	1	0	0	0	1
S7	1	1	0	1	0	0	1	0	1	0	0	0	0	1	0	0	1	1	1	0	0	1	0	0	1	0	1	1	1	0	0	-	1	0	0	0	1	1	0	0	1	0	0	1	1	0	0	0	1
S7	1	1	0	1	0	0	0	0	0	0	0	0	0	1	0	0	1	1	1	0	0	1	0	0	1	0	1	1	1	0	0	0	1	0	0	0	1	1	0	1	1	0	0	1	1	0	0	0	1
S7	1	1	0	1	0	0	1	0	1	0	0	0	0	1	0	0	1	1	1	0	0	1	0	0	1	0	1	1	1	0	0	1	1	0	0	0	1	1	0	1	1	0	0	0	1	0	0	0	1
S7	1	1	0	1	0	0	1	0	1	0	0	0	0	1	0	0	1	1	1	0	0	1	0	0	1	0	1	1	1	0	0	1	1	0	0	0	1	1	0	1	1	0	0	0	1	0	0	0	1
S7	1	1	0	1	0	0	1	0	1	0	0	0	0	1	0	0	1	1	1	0	0	1	0	0	1	0	1	1	1	0	0	1	1	0	0	0	1	1	0	1	1	0	0	0	1	0	0	0	1
S7	1	1	1	1	0	0	1	0	0	0	0	0	0	1	0	0	1	1	1	0	0	1	0	0	1	0	1	1	1	0	0	1	1	0	0	0	1	1	0	0	1	0	0	0	1	0	0	0	1
S7	1	1	1	1	0	0	1	0	0	0	0	0	0	1	0	0	1	1	1	0	0	1	0	0	1	0	1	1	1	0	0	1	1	0	0	0	1	1	0	0	1	0	0	0	1	0	0	0	1
S7	1	1	0	1	0	0	1	0	1	0	0	0	0	1	0	0	1	1	1	0	0	1	0	0	1	0	1	1	1	0	0	1	1	0	0	0	1	1	0	1	1	0	0	0	1	0	0	0	1
S7	1	1	0	1	0	0	1	0	1	0	0	0	0	1	0	0	1	1	1	0	0	1	0	0	1	0	1	1	1	0	0	1	1	0	0	0	1	1	0	1	1	0	0	0	1	0	0	0	1
S7 Average	1	1	0.117647	1	0	0	0.941176	0	0.823529	0	0	0	0	1	0	0	1	0.941176	1	0	0	1	0	0	1	0	1	1	1	0	0	0.8	1	0	0	0	1	1	0	0.6875	0.882353	0	0	0.588235	0.941176	0	0	0	1
S8	0	1	0	0	0	-	1	1	1	1	1	1	1	0	0	1	1	-	1	0	1	0	0	1	0	0	1	1	1	0	0	-	1	-	0	0	1	0	0	0	0	1	0	1	0	1	-	0	1
S8	0	1	0	0	0	-	1	1	1	1	1	1	1	0	0	1	1	-	1	0	1	0	0	1	0	0	1	1	1	0	0	-	1	-	0	0	1	0	0	0	0	1	0	1	0	1	-	0	1
S8	0	1	0	0	0	1	1	1	0	1	1	1	1	0	0	1	1	0	0	0	0	0	0	0	1	0	1	1	1	0	0	0	0	-	0	0	0	0	0	-	0	0	0	0	0	0	0	0	0
S8	0	1	0	0	1	1	1	1	1	1	1	1	1	0	0	1	1	1	1	0	1	0	0	1	1	0	1	1	1	0	0	1	1	0	0	0	1	0	0	0	0	1	0	1	0	1	0	1	1
S8	0	1	0	0	1	1	1	1	1	1	1	1	1	0	0	1	0	1	0	0	1	0	0	1	1	0	1	1	1	0	0	0	1	0	0	0	1	0	0	-	0	0	0	0	0	1	-	0	1
S8	0	1	0	0	1	0	1	0	1	1	1	0	1	0	0	1	1	0	1	0	1	0	0	1	1	0	1	1	1	0	0	-	1	0	0	0	1	0	0	1	0	1	0	1	0	1	0	1	0
S8	0	1	0	0	1	1	1	1	1	1	1	0	1	0	0	1	1	1	1	0	1	0	0	1	1	0	1	1	1	0	0	0	1	0	0	0	1	0	0	0	0	1	0	1	0	1	0	1	1
S8	0	1	0	0	0	0	1	1	1	1	1	1	1	0	0	1	1	1	1	0	0	0	0	1	1	0	1	1	1	0	0	1	0	0	0	0	1	0	0	0	0	1	0	1	0	0	0	1	1
S8	0	1	0	0	1	1	1	1	1	1	1	1	1	0	0	1	1	1	1	0	1	0	0	1	1	0	1	1	1	0	0	1	1	0	0	0	1	0	0	1	0	1	0	1	0	1	0	1	1
S8	0	1	0	0	1	1	1	1	1	1	1	1	1	0	0	1	1	1	1	0	1	0	0	1	1	0	1	1	1	0	0	1	1	0	0	0	1	0	0	-	0	1	0	1	0	1	0	1	1
S8	0	1	0	0	1	1	1	1	1	1	1	1	1	0	0	1	1	1	1	0	1	0	0	1	1	0	1	1	1	0	0	1	1	0	0	0	1	0	0	-	0	1	0	1	0	1	0	1	1
S8	0	0	0	0	1	1	1	1	1	0	1	1	1	0	0	1	1	1	1	0	0	0	0	1	1	0	1	1	1	0	0	0	1	0	0	0	0	0	0	0	0	-	0	1	0	1	0	0	1
S8	0	1	0	0	1	1	1	0	1	1	1	1	1	0	0	1	1	1	1	0	1	0	0	1	1	0	1	1	1	0	0	1	1	0	0	0	1	0	0	-	0	1	0	1	0	1	0	1	1
S8	0	1	0	0	1	1	1	1	1	1	1	1	1	0	0	1	1	1	1	0	1	0	0	1	1	0	1	1	1	0	0	1	1	0	0	0	1	0	0	1	0	1	0	1	0	1	0	1	1
S8	0	1	0	0	1	1	1	1	1	1	1	1	1	0	0	1	1	1	1	0	1	0	0	1	1	0	1	1	1	0	0	1	1	0	0	0	1	0	0	1	0	1	0	1	0	1	0	1	1
S8	0	1	0	0	1	1	1	1	1	1	1	1	1	0	0	1	1	1	1	0	1	0	0	1	1	0	1	1	1	0	0	0	1	0	0	0	1	0	0	1	0	1	0	1	0	1	0	1	1
S8	0	1	0	0	1	1	1	1	1	1	1	0	1	0	0	1	1	1	1	0	1	0	0	1	1	0	1	1	1	0	0	1	1	0	0	0	1	0	0	1	0	1	0	0	0	1	0	1	1
S8	0	1	0	0	1	1	1	1	1	1	1	1	1	0	1	1	1	1	1	0	1	0	0	1	1	0	1	1	1	0	0	0	1	0	0	0	1	0	0	1	0	1	0	1	0	1	0	1	1
S8	0	1	0	0	1	0	1	1	1	1	0	0	1	0	0	1	1	1	0	0	1	0	0	1	1	0	1	1	0	0	0	0	1	-	0	0	1	0	0	0	0	1	0	1	0	0	-	1	1
S8	0	0	0	0	1	0	0	1	1	1	1	1	1	0	0	1	0	1	0	0	1	0	0	1	1	0	1	1	1	0	0	0	1	0	0	0	1	0	0	0	-	1	0	1	0	1	0	1	1
S8	0	1	0	0	1	0	1	1	1	1	1	1	1	0	0	1	1	1	1	0	1	0	0	1	1	0	1	1	1	0	0	0	1	0	0	0	0	0	0	0	-	1	0	1	0	1	0	1	1
S8	0	1	0	0	1	0	1	1	1	1	1	1	1	0	0	1	1	1	1	0	1	0	0	1	1	0	1	1	1	0	0	0	1	0	0	0	0	0	0	0	-	1	0	1	0	1	0	1	1
S8	0	1	0	0	1	0	1	1	1	1	1	1	1	0	0	1	0	1	1	0	1	0	0	1	1	0	1	1	1	0	0	1	1	0	0	0	1	0	0	0	0	1	0	1	0	1	0	1	1
S8	0	1	0	0	1	1	1	0	1	1	1	1	1	0	0	1	1	1	1	0	1	0	0	1	1	0	1	1	1	0	0	0	1	0	0	0	1	0	0	1	0	1	0	1	0	1	0	1	1
S8	0	1	0	0	1	1	1	1	1	1	1	1	1	0	0	1	1	1	1	0	1	0	0	1	1	0	1	1	1	0	0	1	1	0	0	0	1	0	0	1	0	1	0	1	0	1	0	1	1
S8	0	1	0	0	1	1	1	1	1	1	1	1	1	0	-	1	1	1	1	0	1	0	0	1	1	0	1	1	1	0	0	0	1	0	0	0	1	0	0	-	0	1	0	1	0	1	0	1	1
S8	0	1	0	0	1	1	1	0	1	1	1	1	1	0	0	1	1	1	0	0	1	0	0	1	1	0	1	1	1	0	0	1	1	0	0	0	1	0	0	-	0	1	0	1	0	1	0	1	1
S8	0	1	0	0	1	1	1	1	1	1	1	1	1	0	0	1	1	1	1	0	1	0	0	1	1	0	1	1	1	0	0	1	1	0	0	0	1	0	0	1	0	1	0	1	0	1	0	1	1
S8	0	1	0	0	1	1	1	1	1	1	1	1	1	0	0	1	1	1	1	0	1	0	0	1	1	0	1	1	1	0	0	1	1	0	0	0	1	0	0	1	0	1	0	1	0	1	0	1	1
S8	0	1	0	0	1	1	1	1	1	1	1	1	1	0	0	1	1	1	1	0	1	0	0	1	1	0	1	1	1	0	0	1	1	0	0	0	1	0	0	1	0	1	0	1	0	1	0	1	1
S8	0	1	0	0	1	1	1	1	1	1	1	1	1	0	0	0	1	-	1	0	1	0	0	1	1	0	1	1	1	-	0	1	1	0	0	0	0	0	0	-	-	1	0	1	0	1	-	0	1
S8 Average	0	0.935484	0	0	0.870968	0.758621	0.967742	0.870968	0.967742	0.967742	0.967742	0.870968	1	0	0.0333333	0.967742	0.903226	0.928571	0.83871	0	0.903226	0	0	0.967742	0.935484	0	1	1	0.967742	0	0	0.571429	0.935484	0	0	0	0.83871	0	0	0.521739	0	0.933333	0	0.903226	0	0.903226	0	0.806452	0.935484
S9	1	0	1	0	1	1	1	1	0	0	0	0	1	1	0	0	0	0	0	0	0	0	1	0	1	0	0	0	0	0	0	0	0	0	0	0	0	1	1	0	0	0	1	0	0	0	1	0	0
S9	1	0	1	0	1	1	1	1	1	0	0	0	1	1	0	0	0	0	0	0	1	1	1	1	1	0	0	0	1	1	0	1	0	1	0	0	0	0	1	1	0	0	1	0	0	0	1	1	1
S9	1	0	1	0	1	1	1	1	1	0	0	0	1	1	0	0	0	0	0	0	1	1	1	1	1	0	0	0	1	1	0	1	0	1	0	0	0	1	1	1	1	0	1	0	0	0	1	1	1
S9	1	0	1	0	1	1	1	1	1	0	0	0	1	1	0	0	0	1	0	0	1	1	1	1	1	0	0	0	1	1	0	1	0	1	0	0	0	0	1	-	1	0	1	0	0	0	0	1	0
S9	1	0	1	0	1	1	1	1	1	0	0	0	1	1	0	0	0	0	0	0	1	1	1	1	1	0	0	0	1	1	0	1	0	1	0	0	0	1	1	0	1	0	1	0	0	0	1	1	1
S9	1	0	1	0	1	1	1	1	1	0	0	0	1	1	0	0	0	0	0	0	1	1	1	1	1	0	0	0	1	1	0	1	0	1	0	0	0	1	1	0	1	0	1	0	0	0	1	1	1
S9	1	0	1	0	1	1	1	1	1	0	0	0	1	1	0	0	0	0	0	0	1	1	1	1	1	0	0	0	1	1	0	1	0	1	0	0	0	1	1	0	1	0	1	0	0	0	1	1	1
S9	1	0	1	0	1	1	1	1	1	0	0	0	1	1	0	0	0	0	0	0	1	1	1	1	1	0	0	0	1	1	0	0	0	1	0	0	0	1	1	1	1	0	1	0	0	0	1	1	1
S9	1	0	1	0	1	1	1	1	1	0	0	0	1	1	0	0	0	0	0	0	1	1	1	1	1	0	0	0	1	1	0	0	0	1	0	0	0	1	1	1	1	0	1	0	0	0	1	1	1
S9	1	0	1	0	1	1	1	0	1	0	0	0	1	1	0	0	0	0	0	0	1	1	1	1	1	0	0	0	1	1	0	1	0	1	0	0	0	1	1	0	1	0	1	0	0	0	1	1	1
S9	1	0	1	0	1	1	1	1	1	0	0	0	1	1	0	0	0	0	0	0	1	1	1	1	1	0	0	0	1	1	0	1	0	1	0	0	0	1	1	0	0	0	1	0	0	0	0	1	1
S9	1	0	1	0	1	1	1	1	1	0	0	0	1	1	0	0	0	0	0	0	1	1	1	1	1	0	0	0	1	1	0	1	0	1	0	0	0	1	1	0	0	0	1	0	0	0	0	1	1
S9	1	0	1	0	1	1	1	1	1	0	0	0	1	1	0	0	0	0	0	0	1	1	1	1	1	0	0	0	1	1	0	1	0	1	0	0	0	1	1	1	1	0	1	0	0	0	1	1	1
S9	1	0	1	0	1	0	1	1	1	0	0	0	1	1	0	0	0	0	0	0	1	1	1	1	1	0	0	0	1	1	0	0	0	0	0	0	0	1	1	1	0	0	1	0	0	0	0	1	1
S9	1	0	1	0	1	1	1	0	1	0	0	0	1	1	0	0	0	0	0	0	1	1	1	1	1	0	0	0	0	1	0	0	0	1	0	0	0	1	1	0	0	-	1	0	0	0	-	1	1
S9	1	0	1	0	1	1	1	-	1	-	0	0	1	1	0	0	0	0	0	0	1	1	1	1	-	0	0	0	1	1	0	-	0	0	0	0	0	1	1	-	0	0	1	0	0	0	0	0	0
S9	1	0	1	0	1	1	1	0	1	0	0	0	1	1	-	0	0	-	0	0	1	1	1	1	1	0	0	0	0	1	0	0	0	1	0	0	0	1	1	-	-	0	1	0	0	0	0	0	1
S9	1	0	0	0	1	1	1	0	1	0	0	-	1	1	0	0	0	0	0	0	1	1	1	1	0	0	0	0	0	1	0	1	0	0	0	0	0	1	1	0	-	0	1	0	0	0	0	1	1
S9	1	0	0	0	1	1	1	0	1	0	0	-	1	1	0	0	0	0	0	0	1	1	1	1	0	0	0	0	0	1	0	1	0	0	0	0	0	1	1	0	-	0	1	0	0	0	0	1	1
S9	1	0	0	0	1	1	1	0	1	0	0	-	1	1	0	0	0	0	0	0	1	1	1	1	0	0	0	0	0	1	0	1	0	0	0	0	0	1	1	0	-	0	1	0	0	0	0	1	1
S9	1	0	0	0	0	-	1	1	-	0	0	0	1	1	0	0	0	0	0	0	1	1	1	1	0	0	0	0	1	1	0	-	0	0	0	0	0	1	1	0	-	0	0	0	0	0	1	1	1
S9	1	0	1	0	1	0	1	1	1	0	0	0	1	1	-	0	0	0	0	0	1	1	1	1	1	0	0	0	1	0	0	1	0	1	0	0	0	1	1	-	-	0	1	0	0	0	0	1	1
S9	1	0	1	0	1	0	1	1	1	0	0	0	1	1	-	0	0	0	0	0	1	1	1	1	1	0	0	0	1	0	0	1	0	1	0	0	0	1	1	-	-	0	1	0	0	0	0	1	1
S9	1	0	1	0	1	1	1	1	0	0	0	0	1	1	0	0	0	0	0	0	0	0	1	0	1	0	0	0	0	0	0	0	0	0	0	0	0	1	1	0	0	0	1	0	0	0	0	0	0
S9	1	0	1	0	1	1	1	1	1	0	0	0	1	1	0	0	0	0	0	0	1	1	1	1	1	0	0	0	1	1	0	1	0	1	0	0	0	1	1	1	0	0	1	0	0	0	1	1	1
S9	1	0	1	0	1	1	1	1	1	0	0	0	1	1	0	0	0	0	0	0	1	1	1	1	1	0	0	0	1	0	0	0	0	1	0	0	0	1	1	-	1	0	1	0	0	0	0	0	1
S9	1	0	1	0	1	1	1	1	1	0	0	0	1	1	0	0	0	0	0	0	1	1	1	0	1	0	0	0	1	1	0	0	0	1	0	0	0	1	1	0	0	0	1	0	0	0	0	1	1
S9 Average	1	0	0.851852	0	0.962963	0.884615	1	0.769231	0.923077	0	0	0	1	1	0	0	0	0.0384615	0	0	0.925926	0.925926	1	0.888889	0.846154	0	0	0	0.740741	0.814815	0	0.64	0	0.703704	0	0	0	0.925926	1	0.333333	0.5	0	0.962963	0	0	0	0.461538	0.814815	0.851852
S10	0	1	1	1	1	0	1	1	0	0	1	0	1	0	1	0	0	0	0	1	1	1	1	0	0	0	0	0	1	0	1	0	0	1	1	0	0	1	1	0	0	0	0	1	0	0	0	0	0
S10	0	1	1	1	1	1	1	1	0	0	1	0	1	0	1	0	0	0	0	1	1	1	1	0	0	0	0	0	1	0	1	1	0	1	1	0	0	1	1	0	0	0	0	1	0	0	-	0	0
S10	0	1	1	1	1	1	1	1	0	0	1	0	1	0	1	0	0	0	0	1	1	1	1	0	0	0	0	0	1	0	1	1	0	1	1	0	0	1	1	0	0	0	0	1	0	0	-	0	0
S10	1	1	0	1	1	1	0	1	1	1	1	0	1	1	0	1	1	0	1	1	1	1	1	0	1	0	1	1	1	0	0	0	1	0	1	0	1	1	0	-	-	1	1	1	1	1	0	0	1
S10	1	1	0	1	1	1	1	1	1	0	1	0	1	1	1	1	1	0	1	1	0	1	1	1	1	1	1	1	1	0	1	0	1	0	1	1	0	0	1	-	1	1	1	1	1	0	0	1	0
S10	1	1	1	1	1	1	1	1	1	0	1	0	1	1	1	1	1	0	1	1	1	1	1	1	1	1	1	1	1	0	1	0	1	0	0	1	0	1	0	-	1	1	1	1	1	0	0	1	0
S10	0	1	1	1	1	0	1	1	0	0	1	0	1	0	1	0	0	0	0	1	1	1	1	0	0	0	0	0	1	0	1	1	0	1	1	0	0	1	1	0	0	0	0	1	0	0	0	0	0
S10	0	1	1	1	1	0	1	1	0	0	1	0	1	0	1	0	0	0	0	1	1	1	1	0	0	0	0	0	1	0	1	1	0	1	1	0	0	1	1	0	0	0	0	1	0	0	0	0	0
S10	0	1	1	1	1	0	1	1	0	0	1	0	1	0	1	0	0	0	0	1	1	1	0	0	0	0	0	0	1	0	1	1	0	1	1	0	0	1	1	0	0	0	0	1	0	0	0	0	0
S10 Average	0.333333	1	0.777778	1	1	0.555556	0.888889	1	0.333333	0.111111	1	0	1	0.333333	0.888889	0.333333	0.333333	0	0.333333	1	0.888889	1	0.888889	0.222222	0.333333	0.222222	0.333333	0.333333	1	0	0.888889	0.555556	0.333333	0.666667	0.888889	0.222222	0.111111	0.888889	0.777778	0	0.25	0.333333	0.333333	1	0.333333	0.111111	0	0.222222	0.111111
S11	0	1	0	0	1	0	1	1	1	0	1	0	1	0	1	1	1	1	1	1	1	0	0	1	1	0	1	1	1	0	0	-	1	0	0	0	1	0	0	0	0	-	1	1	1	0	0	0	1
S11	0	1	0	0	1	0	1	1	1	0	1	0	1	0	1	1	1	1	1	1	1	0	0	1	1	0	1	1	1	0	0	-	1	0	0	0	1	0	0	0	0	-	1	1	1	0	0	0	1
S11	0	1	0	0	1	0	1	1	1	1	1	0	1	0	0	1	1	1	1	1	1	0	0	1	1	0	1	1	1	0	0	1	1	1	0	0	1	0	0	0	0	0	1	1	1	1	-	1	0
S11	0	1	0	0	1	0	1	1	1	1	1	0	1	0	0	1	1	1	1	1	1	0	0	1	1	0	1	1	1	0	0	1	1	1	0	0	1	0	0	0	0	0	1	1	1	1	-	1	0
S11	0	0	0	0	0	1	1	1	1	1	1	0	1	0	1	1	0	0	1	1	1	0	0	0	1	0	1	1	1	0	0	-	1	0	0	0	1	0	0	0	1	1	1	0	1	1	-	1	1
S11	0	1	0	0	1	0	1	1	1	1	1	0	1	0	0	1	0	-	1	1	1	0	0	1	1	0	1	1	1	0	0	1	1	1	0	0	0	0	0	0	-	1	1	1	1	1	0	0	1
S11	0	1	0	0	1	0	1	1	1	1	1	0	1	0	0	1	0	-	1	1	1	0	0	1	1	0	1	1	1	0	0	1	1	1	0	0	0	0	0	0	-	1	1	1	1	1	0	0	1
S11	0	1	0	0	1	0	1	0	1	-	1	0	1	0	-	1	0	1	1	-	1	0	0	1	1	0	1	1	1	0	0	0	0	1	0	0	1	0	0	-	0	1	1	1	1	1	0	-	1
S11	0	1	0	0	1	0	1	0	1	1	1	0	1	0	-	1	1	-	1	1	1	0	0	0	1	0	1	1	1	0	-	0	1	0	0	0	1	0	0	-	0	0	0	0	1	1	0	0	1
S11	0	1	0	0	1	0	1	0	1	1	1	0	1	0	-	1	1	-	1	1	1	0	0	0	1	0	1	1	1	0	-	0	1	0	0	0	1	0	0	-	0	0	0	0	1	1	0	0	1
S11	0	0	1	1	0	1	0	0	0	0	1	1	0	1	0	1	1	0	0	1	1	1	0	0	0	1	1	1	0	1	1	1	1	0	0	0	0	1	0	1	0	1	0	0	1	1	1	0	0
S11	0	0	1	1	0	1	0	0	0	0	1	1	0	1	0	1	1	0	0	1	1	1	0	0	0	1	1	1	0	1	1	1	1	0	0	0	0	1	0	1	0	1	0	0	1	1	1	0	0
S11	0	0	1	1	0	1	0	0	0	0	1	0	0	1	0	1	1	0	0	1	1	1	0	0	0	1	1	1	0	1	1	0	0	0	0	0	0	1	0	-	0	0	0	0	1	0	1	0	0
S11	0	0	1	1	0	1	0	0	-	0	1	1	0	1	-	1	1	0	0	1	1	1	0	0	0	1	0	1	0	1	0	-	1	0	0	0	-	1	0	-	-	1	0	0	1	1	1	0	0
S11	0	0	1	1	0	1	0	0	-	0	1	1	0	1	-	1	1	0	0	1	1	1	0	0	0	1	0	1	0	1	0	-	1	0	0	0	-	1	0	-	-	1	0	0	1	1	1	0	0
S11	0	0	1	1	0	1	0	0	-	0	1	1	0	1	-	1	1	0	0	1	1	1	0	0	0	1	0	1	0	1	0	-	1	0	0	0	-	1	0	-	-	1	0	0	1	1	1	0	0
S11	0	0	1	1	0	1	0	0	0	0	1	0	0	1	0	1	1	0	0	1	1	1	0	0	0	1	1	1	0	1	1	1	1	0	0	0	0	1	0	1	0	1	0	0	1	1	0	0	0
S11 Average	0	0.529412	0.411765	0.411765	0.529412	0.470588	0.588235	0.411765	0.714286	0.4375	1	0.294118	0.588235	0.411765	0.272727	1	0.764706	0.384615	0.588235	1	1	0.411765	0	0.411765	0.588235	0.411765	0.823529	1	0.588235	0.411765	0.266667	0.636364	0.882353	0.294118	0	0	0.571429	0.411765	0	0.3	0.0833333	0.666667	0.470588	0.411765	1	0.823529	0.428571	0.1875	0.470588
S12	0	0	1	1	0	1	0	0	0	1	0	1	0	1	1	1	1	0	0	0	0	1	0	0	0	1	0	1	0	1	1	0	1	0	0	0	0	0	0	0	1	0	0	0	0	1	-	0	0
S12	0	0	1	1	0	1	1	0	0	1	0	1	0	1	1	1	1	0	0	0	0	1	0	0	0	1	0	1	0	0	1	1	1	0	0	0	0	0	0	0	-	0	0	1	1	1	1	0	0
S12	0	0	1	1	0	1	1	0	0	1	0	1	0	1	1	1	1	0	0	0	0	1	0	0	0	1	0	1	0	0	1	1	1	0	0	0	0	0	0	0	-	0	0	1	1	1	1	0	0
S12	0	0	1	1	0	1	1	0	0	1	0	1	0	1	1	1	1	0	0	0	0	1	0	0	0	1	0	1	0	1	1	1	1	0	0	0	0	0	0	1	1	0	0	1	1	1	1	0	0
S12	0	0	1	1	0	1	1	0	0	1	0	1	0	1	1	1	1	0	0	0	0	1	0	0	0	1	0	1	0	1	1	1	1	0	0	0	0	0	0	1	1	0	0	1	1	1	1	0	0
S12	0	0	1	1	0	1	1	0	0	1	0	0	0	1	1	1	0	0	0	0	0	1	0	0	0	1	0	1	0	1	1	1	1	0	0	0	0	0	0	1	1	0	0	1	1	1	1	0	0
S12	0	0	1	1	0	1	1	0	0	1	0	1	0	1	1	1	1	0	0	0	0	1	0	0	0	1	0	1	0	1	1	1	1	0	0	0	0	0	0	1	1	0	0	1	1	1	1	0	0
S12	0	0	1	1	0	1	1	0	0	1	0	1	0	1	1	1	1	0	0	0	0	1	0	0	0	1	0	1	0	1	1	1	1	0	0	0	0	0	0	0	1	0	0	1	1	1	0	0	0
S12	0	0	1	1	0	1	1	0	0	1	0	1	0	1	1	1	1	0	0	0	0	1	0	0	0	1	0	1	0	1	1	1	1	0	0	0	0	0	0	0	1	0	0	1	1	1	0	0	0
S12	0	0	1	1	0	1	1	0	0	1	0	1	0	1	0	1	1	0	0	0	0	1	0	0	0	1	0	1	0	1	1	1	1	0	0	0	0	0	0	0	1	0	0	1	1	1	0	0	0
S12	0	0	1	1	0	1	1	0	0	1	0	1	0	1	0	1	1	0	0	0	0	0	0	0	0	1	0	1	0	1	1	0	1	0	0	0	0	0	0	0	1	0	0	0	1	1	0	0	0
S12	0	0	1	1	0	1	1	0	0	1	0	1	0	1	1	1	1	0	0	0	0	1	0	0	0	1	0	1	0	1	1	1	1	0	0	0	0	0	0	1	1	0	0	1	1	1	1	0	0
S12 Average	0	0	1	1	0	1	0.916667	0	0	1	0	0.916667	0	1	0.833333	1	0.916667	0	0	0	0	0.916667	0	0	0	1	0	1	0	0.833333	1	0.833333	1	0	0	0	0	0	0	0.416667	1	0	0	0.833333	0.916667	1	0.636364	0	0
S13	0	1	0	1	0	1	1	1	0	0	0	0	0	0	1	1	1	0	0	0	0	0	0	-	1	0	0	1	1	0	0	0	0	0	0	0	0	0	0	0	0	0	0	0	0	0	-	-	0
S13	0	1	0	1	0	1	1	1	0	0	0	0	0	0	1	1	1	0	0	0	0	0	0	-	1	0	0	1	1	0	0	0	0	0	0	0	0	0	0	0	0	0	0	0	0	0	-	-	0
S13	0	1	0	1	0	1	1	0	0	0	0	0	0	0	1	1	1	0	0	0	0	0	0	0	1	0	0	1	1	0	0	0	0	0	0	0	0	0	0	0	0	0	0	0	0	0	0	0	0
S13	0	1	0	1	0	1	1	0	0	0	0	0	0	0	1	1	1	0	0	0	0	0	0	0	1	0	0	1	1	0	0	0	0	0	0	0	0	0	0	0	0	0	0	0	0	0	0	0	0
S13	0	1	0	1	0	1	1	1	0	0	0	0	0	0	1	0	0	0	1	1	1	0	0	1	0	0	0	1	0	0	0	0	0	0	0	0	0	0	0	1	0	1	1	0	1	1	0	1	1
S13	0	1	0	1	0	1	1	1	0	0	0	0	0	0	1	0	0	0	1	1	1	0	0	1	0	0	0	1	0	0	0	0	0	0	0	0	0	0	0	1	0	1	1	0	1	1	0	1	1
S13	0	1	0	1	0	1	1	1	0	0	0	0	0	0	1	1	1	1	1	1	1	0	0	1	1	0	0	1	1	0	0	0	0	1	0	0	0	0	0	1	0	1	1	0	1	1	1	1	1
S13	0	1	0	1	0	1	1	1	0	0	0	0	0	0	1	1	1	1	1	1	1	0	0	1	1	0	0	1	1	0	0	0	0	1	0	0	0	0	0	1	0	1	1	0	1	1	1	1	1
S13	0	1	0	1	0	1	1	1	0	0	0	0	0	0	1	1	1	1	1	1	1	0	0	1	1	0	0	1	1	0	0	0	0	1	0	0	0	0	0	1	0	1	1	0	1	1	1	1	1
S13	0	1	0	1	0	1	1	0	0	0	0	0	0	0	1	1	1	1	1	1	1	0	0	1	1	0	0	1	1	0	0	0	0	1	0	0	0	0	0	0	0	1	1	0	1	1	1	1	1
S13	0	0	0	1	0	0	1	1	0	0	0	0	0	0	1	1	1	0	1	1	1	0	0	1	0	0	0	1	1	0	0	0	0	1	0	0	0	0	0	1	0	1	1	0	1	1	0	1	1
S13	0	0	0	1	0	1	0	1	0	0	0	0	0	0	0	1	1	0	1	1	1	0	0	0	1	0	0	1	1	0	0	0	0	1	0	0	0	0	0	1	-	1	1	0	1	1	1	0	0
S13	0	1	0	1	0	1	1	1	0	0	0	0	0	0	1	1	1	0	1	1	1	0	0	1	1	0	0	1	1	0	0	0	0	1	0	0	0	0	0	0	0	1	1	0	1	1	1	1	1
S13	0	1	0	1	0	0	0	0	0	0	0	0	0	0	0	1	1	1	1	1	1	0	0	1	1	0	0	1	1	0	0	-	0	0	0	0	0	0	0	-	0	0	1	0	1	1	0	0	1
S13	0	1	0	1	0	1	1	1	0	0	0	0	0	0	0	1	0	1	1	1	1	0	0	1	1	0	0	1	1	0	0	0	0	1	0	0	0	0	0	0	0	0	1	0	1	0	0	0	1
S13	0	1	0	1	0	1	1	1	0	0	0	0	0	0	0	1	0	0	0	0	0	0	0	0	1	0	0	1	1	0	0	0	0	0	0	0	0	0	0	0	0	0	0	0	0	0	0	0	0
S13	0	1	0	1	0	1	1	0	0	0	0	0	0	0	0	1	1	1	1	1	1	0	0	0	1	0	0	1	1	0	0	0	0	1	0	0	0	0	0	-	0	1	1	0	1	1	-	1	1
S13	0	1	0	1	0	1	1	1	0	0	0	0	0	0	0	1	1	1	1	1	1	0	0	1	1	0	0	1	1	0	0	0	0	0	0	0	0	0	0	1	0	0	1	0	1	1	0	0	1
S13	0	1	0	1	0	1	1	1	0	0	0	0	0	0	0	1	1	1	1	1	1	0	0	1	1	0	0	1	1	0	0	0	0	0	0	0	0	0	0	1	0	0	1	0	1	1	0	0	1
S13	0	1	0	0	0	-	1	0	0	0	0	0	0	0	1	1	0	0	1	1	1	0	0	1	1	0	0	1	0	0	0	0	0	1	0	0	0	0	0	1	0	0	1	0	1	1	0	1	1
S13	0	1	0	1	0	1	1	1	0	0	0	0	0	0	1	1	1	0	1	1	1	0	0	1	1	0	0	1	1	0	0	0	0	1	0	0	0	0	0	0	0	1	1	0	1	1	1	1	1
S13	0	1	0	1	0	1	1	1	0	0	0	0	0	0	0	1	1	1	1	1	1	0	0	1	1	0	0	1	1	0	0	0	0	1	0	0	0	0	0	1	0	1	1	0	1	1	0	1	1
S13	0	1	0	1	0	1	1	1	0	0	0	0	0	0	0	1	1	0	0	0	0	0	0	0	1	0	0	1	1	0	0	0	0	0	0	0	0	0	0	0	0	0	0	0	0	0	0	0	0
S13	0	1	0	1	0	1	1	1	0	0	0	0	0	0	1	1	1	1	1	1	1	0	0	1	1	0	0	1	1	0	0	0	0	1	0	0	0	0	0	1	0	1	1	0	1	1	1	1	1
S13	0	1	0	1	0	0	1	1	0	0	0	0	0	0	0	1	1	0	1	0	1	0	0	1	1	0	0	1	1	0	0	0	0	0	0	0	0	0	0	0	0	1	1	0	0	1	-	1	1
S13	0	1	0	1	0	0	1	1	0	0	0	0	0	0	0	1	1	0	1	0	1	0	0	1	1	0	0	1	1	0	0	0	0	0	0	0	0	0	0	0	0	1	1	0	0	1	-	1	1
S13	0	1	0	1	0	0	1	1	0	0	0	0	0	0	0	1	1	0	1	0	1	0	0	1	1	0	0	1	1	0	0	0	0	0	0	0	0	0	0	0	0	1	1	0	0	1	-	1	1
S13	0	1	0	1	0	0	1	1	0	0	0	0	0	0	0	1	1	0	1	0	1	0	0	1	1	0	0	1	1	0	0	0	0	0	0	0	0	0	0	0	0	1	1	0	0	1	-	1	1
S13	0	1	0	1	0	1	1	1	0	0	0	0	0	0	1	1	1	0	0	0	0	0	0	0	1	0	0	1	1	0	0	0	0	0	0	0	0	0	0	0	0	0	0	0	0	0	0	0	0
S13	0	1	0	1	0	1	1	1	0	0	0	0	0	0	1	1	1	0	0	0	0	0	0	0	1	0	0	1	1	0	0	0	0	0	0	0	0	0	0	0	0	0	0	0	0	0	0	0	0
S13	0	1	0	1	0	1	1	1	0	0	0	0	0	0	1	1	1	0	0	0	0	0	0	0	1	0	0	1	1	0	0	0	0	0	0	0	0	0	0	0	0	0	0	0	0	0	0	0	0
S13 Average	0	0.935484	0	0.967742	0	0.8	0.935484	0.806452	0	0	0	0	0	0	0.580645	0.935484	0.83871	0.354839	0.709677	0.580645	0.709677	0	0	0.689655	0.903226	0	0	1	0.903226	0	0	0	0	0.419355	0	0	0	0	0	0.413793	0	0.548387	0.709677	0	0.580645	0.677419	0.333333	0.586207	0.677419
S14	1	1	0	1	0	0	1	0	1	0	0	0	0	1	0	0	1	1	1	0	0	1	0	0	1	0	1	1	1	0	0	1	1	0	0	0	1	1	0	-	1	0	0	0	1	0	0	0	1
S14	1	1	0	1	0	0	1	0	1	0	0	0	0	1	0	0	1	1	1	0	0	1	0	0	1	0	1	1	1	0	0	1	1	0	0	0	1	1	0	-	1	0	0	0	1	0	0	0	1
S14	1	1	0	1	0	0	1	0	1	0	0	0	0	1	0	0	1	1	1	0	0	1	0	0	1	0	1	1	1	0	0	0	1	0	0	0	1	1	0	-	-	0	0	0	1	0	0	0	1
S14	1	1	0	1	0	0	1	0	1	0	0	0	0	1	0	0	1	1	1	0	0	1	0	0	1	0	1	1	1	0	0	1	1	0	0	0	1	1	0	1	1	0	0	0	1	0	0	0	1
S14	1	1	0	1	0	0	1	0	1	0	0	0	0	1	0	0	1	1	1	0	0	1	0	0	1	0	1	1	1	0	0	1	1	0	0	0	1	1	0	1	1	0	0	0	1	0	0	0	1
S14	1	1	0	1	0	0	1	0	1	0	0	0	0	1	0	0	1	1	1	0	0	1	0	0	1	0	1	1	1	0	0	-	1	0	0	0	1	1	0	1	0	0	0	0	1	0	0	0	1
S14	1	1	0	1	0	0	1	0	1	0	0	0	0	1	0	0	1	1	1	0	0	1	0	0	1	0	1	1	1	0	0	1	1	0	0	0	1	1	0	1	1	0	0	0	1	0	0	0	1
S14	1	1	0	1	0	0	1	0	1	0	0	0	0	1	0	0	0	1	1	0	0	1	0	0	1	0	1	1	1	0	0	1	1	0	0	0	1	1	0	-	0	0	0	0	1	0	0	0	1
S14	1	1	0	1	0	0	1	0	1	0	0	0	0	1	0	0	1	1	1	0	0	1	0	0	1	0	1	1	1	0	0	0	1	0	0	0	1	1	0	1	0	0	0	0	0	0	-	0	1
S14	1	1	0	1	0	0	1	0	1	0	0	0	0	1	0	0	1	1	1	0	0	1	0	0	1	0	1	1	1	0	0	0	1	0	0	0	1	1	0	1	0	0	0	0	0	0	-	0	1
S14	1	1	0	1	0	0	1	0	1	0	0	0	0	1	0	0	1	1	1	0	0	1	0	0	1	0	1	1	1	0	0	0	1	0	0	0	1	1	0	1	0	0	0	0	0	0	-	0	1
S14	1	1	0	1	0	0	1	0	1	0	0	0	0	1	0	0	1	1	1	0	0	1	0	0	1	0	1	1	1	0	0	0	1	0	0	0	1	1	0	1	1	0	0	0	1	0	0	0	1
S14	1	1	0	1	0	0	1	0	1	0	0	0	0	1	0	0	1	1	1	0	0	0	0	0	1	0	1	1	1	0	0	-	1	0	0	0	1	0	0	1	-	0	0	0	1	0	0	0	1
S14	1	1	0	1	0	0	1	0	1	0	0	0	0	1	0	0	1	1	1	0	0	1	0	0	1	0	1	1	1	0	0	1	1	0	0	0	1	1	0	0	1	0	0	0	1	0	0	0	1
S14	1	1	0	1	0	0	1	0	1	0	0	0	0	1	0	0	1	1	1	0	0	1	0	0	1	0	1	1	1	0	0	1	1	0	0	0	1	1	0	0	1	0	0	0	1	0	0	0	1
S14	1	1	0	1	0	0	1	0	1	0	0	0	0	1	0	0	1	1	1	0	0	1	0	0	1	0	1	1	1	0	0	1	1	0	0	0	1	1	0	0	0	0	0	0	1	0	0	0	1
S14	1	0	0	1	0	0	1	0	1	0	0	0	0	1	0	0	1	1	1	0	0	1	0	0	1	0	1	1	1	0	0	0	1	0	0	0	1	1	0	0	-	0	0	0	1	0	0	0	1
S14 Average	1	0.941176	0	1	0	0	1	0	1	0	0	0	0	1	0	0	0.941176	1	1	0	0	0.941176	0	0	1	0	1	1	1	0	0	0.6	1	0	0	0	1	0.941176	0	0.692308	0.571429	0	0	0	0.823529	0	0	0	1
S16	1	1	0	1	1	1	1	1	0	1	1	0	1	1	1	1	1	1	1	1	1	1	0	1	1	1	0	1	1	0	1	-	1	1	1	0	0	1	-	0	1	0	1	1	0	1	-	1	0
S16	1	1	1	1	0	0	1	0	1	0	1	1	1	1	1	1	1	0	1	0	1	0	0	0	1	1	1	1	1	-	1	-	1	1	0	1	1	1	0	0	0	1	1	1	1	1	0	1	1
S16	1	1	1	1	1	0	1	0	1	0	1	1	1	0	1	1	1	0	1	1	1	0	1	0	1	1	1	1	1	-	1	-	1	1	0	1	1	1	1	0	0	1	1	1	1	1	0	1	1
S16	1	1	1	1	0	0	1	0	1	0	1	1	1	1	1	1	1	0	1	0	1	0	0	0	1	1	1	1	1	-	1	-	1	1	0	1	1	1	0	0	0	1	1	1	1	1	0	1	1
S16 Average	1	1	0.75	1	0.5	0.25	1	0.25	0.75	0.25	1	0.75	1	0.75	1	1	1	0.25	1	0.5	1	0.25	0.25	0.25	1	1	0.75	1	1	0	1	#DIV/0!	1	1	0.25	0.75	0.75	1	0.333333	0	0.25	0.75	1	1	0.75	1	0	1	0.75
S17	0	0	1	1	1	1	0	0	1	0	0	0	1	1	1	0	0	0	0	0	0	1	1	1	1	0	0	0	1	0	1	1	0	0	1	1	0	1	1	1	0	1	1	0	0	0	1	1	1
S17	0	0	1	1	1	1	0	0	1	0	0	0	1	1	1	0	0	0	0	0	0	1	0	1	1	0	0	0	1	0	1	0	0	0	1	1	0	1	1	0	0	1	1	0	0	0	1	1	1
S17	0	0	1	1	1	1	0	0	0	0	0	0	1	1	1	0	0	0	0	0	0	0	1	0	1	0	0	0	0	0	1	0	0	0	1	1	0	1	1	0	0	0	1	0	0	0	0	0	0
S17	0	0	1	1	1	1	0	0	1	0	0	0	1	1	1	0	0	-	0	0	0	1	1	1	1	0	0	0	1	0	1	1	0	0	1	1	0	1	1	0	0	1	1	0	0	0	1	1	1
S17	0	0	0	1	1	0	0	0	1	0	0	-	1	0	1	0	0	0	0	0	0	1	1	1	0	-	0	0	0	-	1	1	0	0	1	1	0	1	1	-	-	0	1	0	0	0	1	-	1
S17	0	0	1	1	1	1	0	0	1	0	0	0	1	1	1	0	0	0	0	0	0	1	1	1	1	0	0	0	1	0	1	1	0	0	1	1	0	1	1	0	0	1	1	0	0	0	1	1	1
S17	0	0	1	1	1	1	0	0	1	0	0	0	1	1	1	0	0	0	0	0	0	1	1	1	1	0	0	0	1	0	1	1	0	0	1	1	0	1	1	0	0	1	1	0	0	0	1	1	1
S17	0	0	1	1	1	1	0	0	1	0	0	0	1	1	1	0	0	0	0	0	0	1	1	1	1	0	0	0	1	0	1	1	0	0	1	1	0	1	1	0	0	1	1	0	0	0	1	1	1
S17	0	0	1	1	1	0	0	0	1	0	0	0	1	1	-	0	0	-	0	0	0	1	1	1	1	0	0	0	1	0	1	0	0	0	1	1	0	1	0	-	0	-	0	0	0	0	0	0	1
S17	0	0	1	1	1	0	0	0	1	0	0	0	1	1	-	0	0	-	0	0	0	1	1	1	1	0	0	0	1	0	1	0	0	0	1	1	0	1	0	-	0	-	0	0	0	0	0	0	1
S17	0	0	0	1	1	1	0	0	1	0	0	0	1	0	1	0	0	0	0	0	0	1	1	1	1	0	0	0	1	0	1	0	0	0	1	1	0	1	1	0	0	1	1	0	0	0	-	1	1
S17	0	0	1	1	1	-	0	0	1	0	0	0	1	1	0	0	0	0	0	0	0	1	1	0	1	0	0	0	0	0	1	-	0	0	1	1	0	0	1	-	-	1	1	0	0	0	0	-	1
S17	0	0	1	1	0	1	0	0	1	0	0	1	0	0	0	0	0	0	0	0	0	1	1	1	1	0	0	0	0	0	1	-	0	0	1	1	0	1	1	-	0	1	1	0	0	0	0	0	1
S17	0	0	1	1	0	1	0	0	1	0	0	1	0	0	0	0	0	0	0	0	0	1	1	1	1	0	0	0	0	0	1	-	0	0	1	1	0	1	1	-	0	1	1	0	0	0	0	0	1
S17	0	0	1	1	1	1	0	0	1	0	0	0	1	1	1	0	0	0	0	0	0	1	1	1	1	0	0	0	1	0	1	1	0	0	1	1	0	1	1	0	0	1	1	0	0	0	1	0	1
S17	1	1	0	1	1	0	1	1	1	0	1	1	1	0	-	1	1	-	1	0	1	1	1	0	1	0	1	1	0	1	1	1	1	0	0	1	0	1	1	0	0	1	0	0	1	1	-	0	1
S17	0	0	1	1	1	1	0	0	1	0	0	0	1	1	1	0	0	0	0	0	0	1	1	1	0	0	0	0	1	0	1	1	0	0	1	1	0	1	1	1	0	1	1	0	0	0	0	1	1
S17	0	0	1	1	1	1	0	0	0	0	0	0	1	1	1	0	0	0	0	0	0	0	1	0	1	0	0	0	0	0	1	0	0	0	1	1	0	1	1	0	0	0	1	0	0	0	0	0	0
S17	0	0	1	1	1	1	0	0	1	0	0	0	1	1	1	0	0	0	0	0	0	1	1	1	1	0	0	0	1	0	1	1	0	0	1	1	0	1	1	0	0	0	1	0	0	0	1	1	1
S17	0	0	1	1	1	1	0	0	1	0	0	0	1	1	1	0	0	0	0	0	0	1	1	1	1	0	0	0	1	0	1	1	0	0	1	1	0	1	1	0	0	0	1	0	0	0	1	1	1
S17	0	0	1	1	1	1	0	0	1	0	0	0	1	1	0	0	0	0	0	0	0	1	1	0	1	0	0	0	1	0	1	1	0	0	0	0	0	1	0	1	0	1	1	0	0	0	1	1	0
S17	0	0	1	1	1	1	0	0	0	0	0	1	1	1	1	0	0	0	0	0	0	0	1	0	1	0	0	0	0	0	1	0	0	0	1	1	0	1	1	0	0	0	1	0	0	0	0	0	0
S17	0	0	1	1	1	1	0	0	1	0	0	1	1	1	1	0	0	0	0	0	0	1	1	1	1	0	0	0	1	0	1	1	0	0	1	1	0	1	1	0	0	1	1	0	0	0	1	1	1
S17	0	0	1	1	1	1	0	0	0	0	0	0	1	1	1	0	0	0	0	0	0	0	1	0	1	0	0	0	0	0	1	0	0	0	1	1	0	1	1	0	0	0	1	0	0	0	0	0	0
S17	0	0	1	1	1	1	0	0	1	0	0	0	1	1	1	0	0	0	0	0	0	1	1	1	1	0	0	0	1	0	1	1	0	0	1	1	0	1	1	0	0	1	1	0	0	0	1	1	1
S17	0	0	1	1	1	1	0	0	1	0	0	0	1	1	1	0	0	0	0	0	0	1	1	1	1	0	0	0	1	0	1	1	0	0	1	1	0	1	1	0	0	1	1	0	0	0	1	1	1
S17	0	0	1	1	1	1	0	0	1	0	0	0	1	1	1	0	0	0	0	0	0	1	1	1	1	0	0	0	1	0	1	1	0	0	1	1	0	1	1	1	0	1	1	0	0	0	1	1	1
S17	0	0	1	1	1	1	0	0	0	0	0	0	1	1	1	0	0	0	0	0	0	0	1	0	1	0	0	0	0	0	1	0	0	0	1	1	0	1	1	0	0	0	1	0	0	0	0	0	0
S17	0	0	1	1	1	1	0	0	1	0	0	0	1	1	1	0	0	0	0	0	0	1	1	1	1	0	0	0	1	0	1	1	0	0	1	1	0	1	1	1	0	1	1	0	0	0	0	1	1
S17	0	0	1	1	1	1	0	0	1	0	0	0	1	1	1	0	0	0	0	0	0	1	1	1	1	0	0	0	1	0	1	1	0	0	1	1	0	1	1	0	0	0	1	0	0	0	1	1	1
S17	0	0	1	1	1	1	0	0	1	0	0	0	1	1	1	0	0	0	0	0	0	1	1	1	1	0	0	0	1	0	1	1	0	0	1	1	0	1	1	1	0	1	1	0	0	0	1	1	1
S17	0	0	0	1	1	1	0	0	1	0	0	-	1	1	-	0	0	0	0	0	0	1	1	1	-	0	0	0	1	0	1	-	0	0	1	1	0	1	1	-	0	1	1	0	0	0	0	-	1
S17	0	0	0	1	1	1	0	0	1	0	0	-	1	1	-	0	0	0	0	0	0	1	1	1	-	0	0	0	1	0	1	-	0	0	1	1	0	1	1	-	0	1	1	0	0	0	0	-	1
S17	0	1	1	1	1	0	0	0	1	0	0	0	1	0	0	0	0	0	0	0	0	0	1	0	1	0	0	0	1	0	1	0	0	0	1	0	0	1	1	-	0	0	1	0	0	0	0	1	0
S17	0	0	1	1	1	1	0	0	0	0	0	0	1	1	1	0	0	0	0	0	0	0	1	0	1	0	0	0	0	0	1	0	0	0	1	1	0	1	1	0	0	0	1	0	0	0	0	0	0
S17	0	0	1	1	1	1	0	0	1	0	0	0	1	1	1	0	0	0	0	0	0	1	1	1	1	0	0	0	1	0	1	1	0	0	1	1	0	1	1	-	0	1	1	0	0	0	1	1	1
S17 Average	0.0277778	0.0555556	0.861111	1	0.944444	0.857143	0.0277778	0.0277778	0.833333	0	0.0277778	0.151515	0.944444	0.833333	0.83871	0.0277778	0.0277778	0	0.0277778	0	0.0277778	0.805556	0.972222	0.722222	0.941176	0	0.0277778	0.0277778	0.694444	0.0285714	1	0.645161	0.0277778	0	0.944444	0.944444	0	0.972222	0.916667	0.230769	0	0.676471	0.916667	0	0.0277778	0.0277778	0.529412	0.625	0.777778
S18	0	1	-	0	0	0	-	-	1	0	0	0	0	0	-	-	0	0	1	1	1	1	0	1	1	0	1	1	0	0	0	-	-	1	0	0	0	0	1	-	1	0	1	1	0	0	0	-	0
S18	0	1	-	0	0	0	-	-	1	0	0	0	0	0	-	-	0	0	1	1	1	1	0	1	1	0	1	1	0	0	0	-	-	1	0	0	0	0	1	-	1	0	1	1	0	0	0	-	0
S18	0	0	0	0	1	0	0	1	1	0	0	0	0	1	0	1	0	0	0	1	0	0	1	0	0	1	0	0	1	1	0	0	0	0	1	0	1	0	1	1	0	0	1	0	1	0	1	0	0
S18	0	0	0	0	1	0	0	0	1	0	0	0	0	1	0	1	0	0	0	1	0	0	1	0	0	1	0	0	1	1	0	0	0	0	1	0	1	0	1	0	-	0	1	0	1	0	0	0	0
S18	0	0	0	0	1	0	0	0	1	0	0	0	0	1	0	1	0	0	0	1	0	0	1	0	0	1	0	0	1	1	0	0	0	0	1	0	1	0	1	0	-	0	1	0	1	0	0	0	0
S18	0	0	0	0	1	0	0	1	1	0	0	0	0	1	0	1	0	0	0	1	0	0	1	0	0	1	0	0	1	1	0	0	0	0	1	0	1	0	1	1	0	0	1	0	1	0	1	0	0
S18	0	0	0	0	0	0	0	1	1	0	0	0	0	1	0	1	0	0	0	0	0	0	1	0	0	1	0	0	1	1	0	0	0	0	1	0	1	0	1	0	0	0	1	0	1	0	0	1	0
S18 Average	0	0.285714	0	0	0.571429	0	0	0.6	1	0	0	0	0	0.714286	0	1	0	0	0.285714	0.857143	0.285714	0.285714	0.714286	0.285714	0.285714	0.714286	0.285714	0.285714	0.714286	0.714286	0	0	0	0.285714	0.714286	0	0.714286	0	1	0.4	0.4	0	1	0.285714	0.714286	0	0.285714	0.2	0
S19	0	1	1	1	1	1	1	1	0	0	1	0	1	0	1	0	0	0	0	1	1	0	1	0	0	0	0	0	1	0	1	1	0	1	1	0	0	1	1	0	0	0	0	1	0	0	0	0	0
S19	0	1	1	1	1	1	1	1	0	0	1	0	1	0	1	0	0	0	0	1	1	0	1	0	0	0	0	0	1	0	1	1	0	1	1	0	0	1	1	0	0	0	0	1	0	0	0	0	0
S19 Average	0	1	1	1	1	1	1	1	0	0	1	0	1	0	1	0	0	0	0	1	1	0	1	0	0	0	0	0	1	0	1	1	0	1	1	0	0	1	1	0	0	0	0	1	0	0	0	0	0
S20	1	0	1	1	0	1	0	1	1	0	0	1	1	1	0	1	1	1	1	1	1	1	1	0	0	1	0	0	1	0	1	1	1	1	0	1	1	1	1	1	0	0	0	0	1	1	1	1	0
S20	1	1	1	1	0	1	0	1	0	1	1	1	1	0	1	1	1	0	1	1	1	1	1	1	1	1	1	1	0	1	1	0	1	0	0	1	1	1	1	1	1	1	1	1	1	1	0	1	0
S20	1	1	1	1	0	1	1	1	1	1	1	1	1	0	1	1	1	0	1	1	0	1	1	0	0	1	1	1	0	0	0	0	0	1	1	0	0	1	0	0	1	1	0	1	0	1	1	0	1
S20	0	0	0	0	1	1	1	1	1	0	1	0	1	1	0	1	1	1	1	0	1	0	1	1	0	1	1	1	0	0	1	0	1	0	0	1	0	0	0	0	0	1	1	0	0	1	1	0	1
S20	0	0	0	1	0	0	0	0	0	1	1	0	1	1	1	1	1	0	0	1	0	0	0	0	1	1	1	0	0	1	1	0	1	1	1	1	0	1	0	0	1	0	1	1	1	0	0	1	0
S20	0	-	0	1	0	0	-	-	-	1	1	0	1	1	1	1	1	0	0	1	0	0	-	0	1	1	1	0	-	1	1	0	1	1	1	1	0	1	0	-	1	0	1	1	1	0	0	1	0
S20	1	0	1	1	1	1	1	1	0	1	0	1	1	1	0	1	1	0	1	0	1	1	0	1	1	0	1	0	1	1	0	0	1	0	0	1	1	1	1	0	1	0	1	1	0	0	0	1	1
S20	0	0	0	1	0	0	0	0	0	1	1	0	1	1	1	1	1	0	0	1	0	0	0	0	1	1	1	0	0	1	1	0	1	1	1	1	0	1	0	0	1	0	1	1	1	0	0	1	0
S20	1	1	0	1	1	0	0	1	0	1	1	1	0	1	0	1	1	0	0	0	1	1	0	1	1	1	1	1	1	1	1	1	0	1	1	1	1	0	1	0	1	1	0	0	0	0	1	1	1
S20	0	-	0	1	0	0	-	-	-	1	1	0	1	1	1	1	1	0	0	1	0	0	-	0	1	1	1	0	-	1	1	0	1	1	1	1	0	1	0	-	1	0	1	1	1	0	0	1	0
S20	1	1	1	1	0	0	0	1	1	1	1	0	1	1	1	1	1	1	1	1	1	1	1	1	1	0	1	1	0	0	1	0	1	0	1	1	1	1	0	0	0	1	0	1	0	1	0	0	1
S20	0	1	1	1	1	1	1	1	1	1	1	0	1	1	1	1	0	1	1	1	1	1	1	1	0	1	1	1	0	1	0	0	1	0	1	1	1	1	1	1	0	1	0	1	1	1	1	1	0
S20	1	1	1	1	1	1	0	1	1	1	1	1	1	1	-	1	0	-	1	1	1	0	0	1	0	0	1	1	0	0	1	1	0	1	1	1	1	1	1	-	0	1	1	1	1	1	0	0	0
S20	1	1	1	1	0	0	0	1	1	0	1	0	0	1	-	1	0	-	0	0	0	1	0	0	0	0	1	1	0	0	1	0	0	1	1	0	1	0	0	-	0	1	1	1	0	0	0	1	0
S20	1	1	1	1	1	1	0	1	1	0	1	1	1	1	-	1	1	-	0	1	1	1	0	1	0	1	1	1	0	0	1	1	0	1	1	0	1	1	1	-	0	1	1	1	1	0	0	0	0
S20	1	1	1	1	1	1	1	1	1	1	1	1	1	-	-	1	1	0	1	1	1	1	0	1	0	1	1	1	1	0	1	0	0	1	1	1	0	1	1	0	0	1	1	1	0	1	0	0	-
S20	1	1	1	1	1	1	1	1	1	1	1	1	1	-	-	1	1	0	1	1	1	1	0	1	0	1	1	1	1	0	1	0	0	1	1	1	0	1	1	0	0	1	1	1	0	1	0	0	-
S20	0	1	0	1	1	0	0	0	0	0	1	0	1	-	-	0	0	0	1	0	1	0	0	1	0	1	0	0	0	0	0	0	0	0	1	0	0	0	1	0	0	1	1	1	0	1	0	0	-
S20	1	1	1	0	1	1	0	1	1	0	1	0	1	1	1	1	1	0	0	1	1	1	0	1	1	1	1	1	1	0	1	-	1	0	1	0	0	1	1	-	1	1	0	1	1	1	0	1	1
S20	1	0	1	1	1	1	1	1	1	1	1	0	1	1	0	0	1	0	1	1	0	1	1	1	1	1	1	1	0	1	1	0	1	-	1	1	1	1	1	0	1	1	1	0	1	1	1	0	1
S20 Average	0.65	0.666667	0.65	0.9	0.55	0.6	0.388889	0.833333	0.666667	0.7	0.9	0.45	0.9	0.882353	0.642857	0.9	0.8	0.235294	0.6	0.75	0.65	0.65	0.388889	0.65	0.5	0.8	0.9	0.65	0.333333	0.45	0.8	0.210526	0.6	0.631579	0.8	0.75	0.5	0.8	0.6	0.214286	0.5	0.7	0.7	0.8	0.55	0.6	0.3	0.55	0.411765
S21	0	1	0	0	0	0	0	0	0	0	1	1	0	0	1	0	1	1	1	0	1	0	0	0	0	1	0	0	0	0	0	1	1	1	0	0	0	1	0	-	0	1	0	0	1	0	0	0	1
S21	1	0	1	0	1	1	1	1	1	1	1	1	1	0	1	1	1	1	0	1	1	1	1	1	1	0	1	1	1	0	1	-	1	1	1	0	1	0	1	1	0	1	0	1	1	1	1	1	1
S21	1	1	1	0	1	1	1	-	1	1	1	0	1	1	1	1	1	1	0	1	1	1	1	1	0	0	1	1	0	0	1	-	0	1	1	1	1	0	1	1	1	1	0	1	1	1	1	1	1
S21	0	1	0	0	0	0	0	0	0	0	1	1	0	0	1	0	1	1	1	0	1	0	0	0	0	1	0	0	0	0	0	1	1	1	0	0	0	1	0	0	0	1	0	0	1	0	1	0	1
S21	0	1	0	0	0	0	0	0	0	0	1	1	0	0	1	0	0	1	1	0	1	0	0	0	0	1	0	0	0	0	0	0	1	0	0	0	0	1	0	-	0	1	0	0	1	0	1	0	1
S21	0	1	0	0	0	0	0	0	0	0	1	1	0	0	1	0	0	1	1	0	1	0	0	0	0	1	0	0	0	0	0	0	1	0	0	0	0	1	0	-	0	1	0	0	1	0	1	0	1
S21	0	1	0	0	0	0	0	0	0	0	1	1	0	0	1	0	1	1	1	0	1	0	0	0	0	1	0	0	0	0	0	1	1	1	0	0	0	1	0	0	-	1	0	0	1	0	0	0	1
S21	0	1	0	0	0	0	0	0	0	0	1	1	0	0	1	0	1	1	1	0	1	0	0	0	0	1	0	0	0	0	0	1	1	1	0	0	0	1	0	0	0	1	0	0	1	0	0	0	1
S21	0	1	0	0	0	0	0	0	0	0	1	1	0	0	1	0	1	1	1	0	1	0	0	0	0	1	0	0	0	0	0	1	1	1	0	0	0	1	0	0	0	1	0	0	1	0	0	0	1
S21	0	1	0	0	0	0	0	0	0	0	1	1	0	0	1	0	1	1	1	0	1	0	0	0	0	1	0	0	0	0	0	1	1	1	0	0	0	1	0	0	0	1	0	0	1	0	0	0	1
S21	0	1	0	0	0	0	0	0	0	0	1	1	0	0	1	0	1	1	1	0	1	0	0	0	0	1	0	0	0	0	0	1	1	1	0	0	0	1	0	0	0	1	0	0	1	0	1	0	1
S21	0	1	1	0	1	1	1	1	1	1	0	0	1	0	1	1	1	0	1	1	1	1	1	0	1	0	1	1	1	1	1	0	1	0	1	1	1	0	0	1	-	0	1	1	0	0	0	0	1
S21	0	1	0	0	0	0	0	0	0	0	1	1	0	0	1	0	1	1	1	0	1	0	0	0	0	1	0	0	0	0	0	1	1	1	0	0	0	1	0	0	0	1	0	0	1	0	1	0	1
S21 Average	0.153846	0.923077	0.230769	0	0.230769	0.230769	0.230769	0.166667	0.230769	0.230769	0.923077	0.846154	0.230769	0.0769231	1	0.230769	0.846154	0.923077	0.846154	0.230769	1	0.230769	0.230769	0.153846	0.153846	0.769231	0.230769	0.230769	0.153846	0.0769231	0.230769	0.727273	0.923077	0.769231	0.230769	0.153846	0.230769	0.769231	0.153846	0.3	0.0909091	0.923077	0.0769231	0.230769	0.923077	0.153846	0.538462	0.153846	1
S22	0	0	1	1	0	0	0	0	0	0	1	1	0	1	0	1	1	0	0	1	1	1	0	0	0	1	1	1	0	0	1	0	1	0	0	0	0	1	0	-	0	0	0	0	1	1	1	0	0
S22	0	0	1	1	0	1	0	0	0	0	1	1	0	1	0	0	0	0	0	1	1	1	0	0	0	1	1	1	0	1	1	1	1	0	0	0	0	1	0	-	0	1	0	0	1	1	0	0	0
S22	0	0	1	1	0	1	0	0	0	0	1	1	0	1	0	1	1	0	0	1	1	1	0	0	0	1	1	1	0	1	1	1	1	0	0	0	0	1	0	1	0	1	0	0	1	1	1	0	0
S22	0	0	1	1	0	1	0	0	0	0	1	1	0	1	0	1	1	0	0	1	1	1	0	0	0	1	1	1	0	1	1	1	1	0	0	0	0	1	0	1	0	1	0	0	1	1	1	0	0
S22	0	0	1	1	0	1	0	0	0	0	1	1	0	1	0	1	1	0	0	1	1	1	0	0	0	1	1	1	0	1	1	0	1	0	0	0	0	1	0	-	0	1	0	0	1	0	1	0	0
S22	0	0	1	1	0	1	0	0	0	0	1	1	0	1	0	1	1	0	0	1	1	1	0	0	0	1	1	1	0	1	1	0	1	0	0	0	0	1	0	-	0	1	0	0	1	0	1	0	0
S22	0	0	1	1	0	1	0	0	0	0	1	1	0	1	0	1	1	0	0	1	1	1	0	0	0	1	1	1	0	1	1	0	1	0	0	0	0	1	0	-	0	1	0	0	1	0	1	0	0
S22	0	0	1	1	0	1	0	0	0	0	1	1	0	1	0	1	0	0	0	1	1	1	0	0	0	1	1	1	0	1	1	0	1	0	0	0	0	1	0	0	0	1	0	0	1	1	1	0	0
S22	0	0	1	1	0	1	0	0	0	0	1	1	0	1	0	1	1	0	0	1	1	1	0	0	0	1	1	1	0	1	1	1	1	0	0	0	0	1	0	0	0	1	0	0	1	1	1	0	0
S22	0	0	1	1	0	1	0	0	0	0	1	1	0	1	0	1	1	0	0	1	1	1	0	0	0	1	1	1	0	1	1	1	1	0	0	0	0	1	0	0	0	1	0	0	1	1	1	0	0
S22	0	0	1	1	0	1	0	0	0	0	1	1	0	1	0	1	1	0	0	1	1	1	0	0	0	1	1	1	0	1	1	1	1	0	0	0	0	1	0	0	0	1	0	0	1	1	1	0	0
S22	0	0	1	1	0	1	0	0	0	0	1	1	0	1	0	1	1	0	0	1	1	1	0	0	0	1	1	1	0	1	1	1	0	0	0	0	0	1	0	0	0	1	0	0	0	0	1	0	0
S22	0	0	1	1	0	1	0	0	0	0	1	1	0	1	0	1	1	0	0	1	1	1	0	0	0	1	1	1	0	1	1	0	1	0	0	0	0	1	0	1	0	1	0	0	1	1	1	0	0
S22	0	0	1	1	0	1	0	0	0	0	1	1	0	1	0	1	1	0	0	1	1	1	0	0	0	1	1	1	0	1	1	0	1	0	0	0	0	1	0	1	0	1	0	0	1	1	1	0	0
S22	0	0	1	1	0	1	0	0	0	0	1	1	0	1	0	1	1	0	0	1	1	1	0	0	0	1	1	1	0	1	1	1	1	0	0	0	0	1	0	1	0	1	0	0	1	1	1	0	0
S22	0	0	1	1	0	1	0	0	0	0	1	1	0	1	0	1	1	0	0	1	1	1	0	0	0	1	1	1	0	1	1	1	1	0	0	0	0	1	0	1	0	1	0	0	1	1	1	0	0
S22	0	0	1	1	0	1	0	0	0	0	1	1	0	1	0	1	1	0	0	1	1	1	0	0	0	1	1	1	0	1	1	1	0	0	0	0	0	1	0	0	0	1	0	0	0	0	1	0	0
S22	0	0	1	1	0	1	0	0	0	0	1	1	0	1	0	1	1	0	0	1	1	1	0	0	0	1	1	1	0	1	1	1	0	0	0	0	0	1	0	0	0	1	0	0	0	0	1	0	0
S22	0	0	1	1	0	1	0	0	0	0	1	1	0	1	0	1	1	0	0	1	1	1	0	0	0	1	1	1	0	1	1	1	1	0	0	0	0	1	0	1	0	1	0	0	1	1	1	0	0
S22	0	0	1	1	0	1	0	0	0	0	1	1	0	1	0	1	1	0	0	1	1	1	0	0	0	1	1	1	0	1	1	1	1	0	0	0	0	1	0	0	0	1	0	0	1	1	1	0	0
S22	0	0	1	1	0	1	0	0	0	0	1	1	0	1	0	1	1	0	0	1	1	1	0	0	0	1	1	1	0	1	1	1	1	0	0	0	0	1	0	0	0	1	0	0	1	1	1	0	0
S22	0	0	1	1	0	1	0	0	0	0	1	1	0	1	0	1	1	0	0	1	1	1	0	0	0	1	1	1	0	1	1	1	1	0	0	0	0	1	0	-	0	1	0	0	1	1	1	0	0
S22 Average	0	0	1	1	0	0.954545	0	0	0	0	1	1	0	1	0	0.954545	0.909091	0	0	1	1	1	0	0	0	1	1	1	0	0.954545	1	0.681818	0.863636	0	0	0	0	1	0	0.4375	0	0.954545	0	0	0.863636	0.727273	0.954545	0	0
S23	0	0	1	1	0	0	1	0	1	1	0	1	0	1	0	1	1	1	1	1	1	0	1	1	1	1	1	1	0	0	1	1	1	0	1	1	1	0	0	0	0	1	1	1	1	1	1	1	1
S23 Average	0	0	1	1	0	0	1	0	1	1	0	1	0	1	0	1	1	1	1	1	1	0	1	1	1	1	1	1	0	0	1	1	1	0	1	1	1	0	0	0	0	1	1	1	1	1	1	1	1
S24	1	1	1	1	0	1	1	0	0	1	0	1	0	1	1	1	-	0	0	0	0	1	0	0	0	0	0	1	0	1	1	1	1	0	0	0	0	0	0	-	0	0	0	1	0	1	0	0	0
S24	1	1	1	1	0	1	1	0	0	1	0	1	0	1	0	1	1	0	0	0	0	1	0	0	0	0	0	1	0	1	1	0	1	0	0	0	0	0	0	-	1	0	0	1	1	1	1	0	1
S24	1	1	1	1	0	1	1	0	0	0	0	1	0	1	1	1	1	0	0	0	0	1	0	0	0	0	0	1	0	1	1	-	1	0	0	0	0	0	0	-	0	-	0	1	1	1	-	-	1
S24	0	0	0	1	1	1	1	0	1	0	1	0	0	0	1	1	1	0	0	0	0	0	1	1	0	0	0	1	0	0	0	1	1	0	0	1	1	0	0	0	0	0	1	1	0	1	0	1	1
S24	0	0	0	1	1	1	1	0	1	0	1	0	0	0	1	1	1	0	0	0	0	0	1	1	0	0	0	1	0	0	0	1	1	0	0	1	1	0	0	0	0	0	1	1	0	1	0	1	1
S24 Average	0.6	0.6	0.6	1	0.4	1	1	0	0.4	0.4	0.4	0.6	0	0.6	0.8	1	1	0	0	0	0	0.6	0.4	0.4	0	0	0	1	0	0.6	0.6	0.75	1	0	0	0.4	0.4	0	0	0	0.2	0	0.4	1	0.4	1	0.25	0.5	0.8
S25	1	1	0	1	0	0	1	0	1	0	0	0	0	1	0	0	1	1	1	0	0	1	0	0	1	0	1	1	1	0	0	1	1	0	0	0	1	1	0	1	0	0	0	0	1	0	0	0	1
S25	1	1	0	1	0	0	1	0	1	0	0	0	0	1	0	0	1	1	1	0	0	1	0	0	1	0	1	1	1	0	0	1	1	0	0	0	1	1	0	1	1	0	0	0	1	0	0	0	1
S25	1	1	0	1	0	0	1	0	1	0	0	0	0	1	0	0	1	1	1	0	0	1	0	0	1	0	1	1	1	0	0	1	1	0	0	0	1	1	0	1	1	0	0	0	1	0	0	0	1
S25	1	1	0	1	0	0	1	0	1	0	0	0	0	1	0	0	1	1	1	0	0	1	0	0	1	0	1	1	1	0	0	1	1	0	0	0	1	1	0	1	1	0	0	0	1	0	0	0	1
S25 Average	1	1	0	1	0	0	1	0	1	0	0	0	0	1	0	0	1	1	1	0	0	1	0	0	1	0	1	1	1	0	0	1	1	0	0	0	1	1	0	1	0.75	0	0	0	1	0	0	0	1
S27	0	0	0	1	1	1	0	0	0	1	1	1	0	0	0	1	1	0	0	0	1	0	0	0	1	0	0	1	0	0	1	0	0	0	1	1	0	0	0	0	0	1	0	1	0	1	0	0	1
S27	0	0	0	1	1	1	0	0	0	1	1	1	0	0	0	1	1	0	0	0	1	0	0	0	1	0	0	1	0	0	1	0	0	0	1	1	0	0	0	0	0	1	0	1	0	1	0	0	1
S27	0	0	0	1	1	1	0	0	0	1	1	0	0	0	0	1	0	0	0	0	0	0	1	0	0	1	0	1	0	0	1	0	0	0	1	1	0	0	0	0	0	1	0	1	0	1	0	0	1
S27	0	0	0	1	1	1	0	0	0	1	1	1	0	0	0	1	1	0	0	0	1	0	1	0	1	1	0	1	0	0	1	0	0	0	1	1	0	0	0	1	0	1	0	1	0	1	0	1	1
S27	0	0	0	1	1	1	0	0	0	1	1	1	0	0	0	1	1	0	0	0	1	0	1	0	1	1	0	1	0	0	1	0	0	0	1	1	0	0	0	1	0	1	0	1	0	1	0	1	1
S27	0	0	0	1	1	0	0	0	0	0	1	1	0	0	-	0	-	0	0	0	1	0	0	0	1	1	0	1	0	0	1	0	0	0	0	0	0	0	0	0	0	1	0	1	0	0	-	1	1
S27	0	0	0	1	1	1	0	0	0	1	1	1	0	0	0	1	1	0	0	0	1	0	1	0	1	1	0	1	0	0	1	0	0	0	1	1	0	0	0	1	0	1	0	1	0	1	0	1	1
S27	0	0	0	1	1	1	0	0	0	1	1	1	0	0	0	1	1	0	0	0	1	0	1	0	1	1	0	1	0	0	1	0	0	0	1	1	0	0	0	1	0	1	0	1	0	1	0	1	1
S27	0	0	0	1	1	1	0	0	0	1	1	1	0	0	0	1	1	0	0	0	1	0	1	0	1	1	0	1	0	0	1	0	0	0	1	1	0	0	0	1	0	1	0	1	0	1	0	1	1
S27	0	0	0	1	1	1	0	0	0	1	1	1	0	0	0	1	1	0	0	0	1	0	1	0	1	1	0	1	0	0	1	-	0	-	1	1	0	0	0	-	-	1	0	1	0	0	-	1	1
S27	0	0	0	1	1	1	0	0	0	1	1	1	0	0	0	1	1	0	0	0	1	0	1	0	1	1	0	1	0	0	1	-	0	-	1	1	0	0	0	-	-	1	0	1	0	0	-	1	1
S27	0	0	0	1	1	1	0	0	0	1	1	1	0	0	0	1	1	0	0	0	1	0	1	0	1	1	0	1	0	0	1	0	0	0	1	1	0	0	0	1	0	1	0	1	0	1	0	1	1
S27	0	0	0	1	1	1	0	0	0	1	1	1	0	0	0	1	0	0	0	0	1	0	1	0	1	1	0	1	0	0	1	-	0	0	1	1	0	0	0	-	0	0	0	0	0	1	0	1	1
S27	0	0	0	1	1	1	0	0	0	1	1	1	0	0	0	1	1	0	0	0	1	0	1	0	1	1	0	1	0	0	1	-	0	0	1	1	0	0	0	-	0	1	0	1	0	0	0	0	1
S27	0	0	0	1	0	1	0	0	0	1	1	1	0	0	0	1	1	0	0	0	1	0	1	0	1	1	0	1	0	0	1	-	0	0	1	1	0	0	0	-	0	1	0	1	0	0	0	0	1
S27	0	0	0	1	1	1	0	0	0	1	1	1	0	0	0	1	1	0	0	0	1	0	1	0	1	1	0	1	0	0	1	0	0	0	1	1	0	0	0	1	0	1	0	1	0	1	0	1	1
S27	0	0	0	1	1	-	0	0	0	1	1	-	0	0	-	1	1	-	0	0	1	0	1	0	1	0	0	1	0	-	1	0	0	0	1	1	-	0	0	-	-	0	0	0	-	0	-	-	1
S27	0	0	0	1	1	1	0	0	0	1	1	1	0	0	0	1	0	0	0	0	1	0	1	0	0	1	0	1	0	0	1	0	0	0	1	1	0	0	0	0	0	1	0	1	0	1	0	0	1
S27 Average	0	0	0	1	0.944444	0.941176	0	0	0	0.944444	1	0.941176	0	0	0	0.944444	0.823529	0	0	0	0.944444	0	0.833333	0	0.888889	0.833333	0	1	0	0	1	0	0	0	0.944444	0.944444	0	0	0	0.583333	0	0.888889	0	0.888889	0	0.666667	0	0.647059	1
S28	1	0	1	0	1	1	1	0	1	0	0	0	1	1	1	0	0	0	0	0	0	1	1	1	1	0	0	0	1	0	0	1	0	0	0	0	0	1	1	0	0	1	1	0	0	0	0	1	1
S28	1	0	1	0	1	0	1	0	1	0	0	0	1	0	0	0	0	0	0	0	0	1	1	1	1	0	0	0	1	0	0	-	0	0	0	0	0	1	1	-	0	1	1	0	0	0	0	1	1
S28	1	0	1	0	1	0	1	0	1	0	0	0	1	1	0	0	0	0	0	0	0	1	1	1	1	0	0	0	1	0	0	-	0	0	0	0	0	1	1	-	0	1	1	0	0	0	1	0	1
S28	1	0	1	0	1	1	1	0	1	0	0	0	1	1	0	0	0	0	0	0	0	1	1	1	1	0	0	0	1	0	0	1	0	0	0	0	0	1	1	0	0	1	1	0	0	0	0	0	1
S28	1	0	1	0	1	1	1	0	1	0	0	0	1	1	0	0	0	0	0	0	0	1	1	1	1	0	0	0	1	0	0	1	0	0	0	0	0	1	1	0	0	1	1	0	0	0	0	0	1
S28	1	0	1	0	1	1	1	0	1	0	0	0	1	1	1	0	0	0	0	0	0	1	1	1	1	0	0	0	0	0	0	1	0	0	0	0	0	1	1	0	0	1	1	0	0	0	1	1	1
S28	1	0	1	0	1	1	1	0	1	0	0	0	1	1	1	0	0	0	0	0	0	1	1	1	1	0	0	0	1	0	0	0	0	0	0	0	0	0	1	-	-	1	1	0	0	0	0	0	1
S28	1	0	1	0	1	1	1	0	1	0	0	0	1	1	1	0	0	0	0	0	0	1	1	1	1	0	0	0	1	0	0	0	0	0	0	0	0	0	1	-	-	1	1	0	0	0	0	0	1
S28	1	0	1	0	1	1	1	0	1	0	0	0	1	1	1	0	0	0	0	0	0	1	1	1	1	0	0	0	1	0	0	0	0	0	0	0	0	0	1	-	-	1	1	0	0	0	0	0	1
S28	1	0	1	0	1	-	1	0	1	0	0	0	1	1	-	0	0	0	0	0	0	1	1	0	0	0	0	0	1	0	0	1	0	0	0	0	0	1	1	0	0	1	0	0	0	0	1	1	1
S28	1	0	1	0	1	-	1	0	1	0	0	0	1	1	-	0	0	0	0	0	0	1	1	0	0	0	0	0	1	0	0	1	0	0	0	0	0	1	1	0	0	1	0	0	0	0	1	1	1
S28	1	0	1	0	1	1	1	0	1	0	0	0	1	1	1	0	0	0	0	0	0	1	1	1	1	0	0	0	1	0	0	1	0	0	0	0	0	1	1	0	0	1	1	0	0	0	1	1	1
S28	1	0	0	0	1	1	1	0	1	0	0	0	1	1	1	0	0	0	0	0	0	1	0	1	0	0	0	0	1	0	0	0	0	0	0	0	0	1	1	-	0	-	1	0	0	0	-	1	1
S28	1	0	1	0	1	1	1	0	0	0	0	-	1	1	0	0	0	0	0	0	0	1	1	0	1	0	0	0	1	0	0	-	0	0	0	0	0	1	1	-	0	1	1	0	0	0	0	1	1
S28	1	0	1	0	1	1	1	0	0	0	0	-	1	1	0	0	0	0	0	0	0	1	1	0	1	0	0	0	1	0	0	-	0	0	0	0	0	1	1	-	0	1	1	0	0	0	0	1	1
S28	1	0	1	0	1	1	1	0	1	0	0	0	1	0	1	0	0	0	0	0	0	1	0	1	1	0	0	0	1	0	0	-	0	0	0	0	0	1	1	-	0	1	1	0	0	0	1	1	1
S28	1	0	1	0	1	1	1	0	1	0	0	0	1	1	1	0	0	0	0	0	0	1	1	1	1	0	0	0	1	0	0	0	0	0	0	0	0	1	1	0	0	1	1	0	0	0	1	1	1
S28	1	0	1	0	1	0	1	0	1	0	0	0	1	1	1	0	0	0	0	0	0	1	1	1	1	0	0	0	1	0	0	0	0	0	0	0	0	1	1	0	0	1	1	0	0	0	-	1	1
S28	1	0	1	0	1	0	1	0	1	0	0	0	1	1	1	0	0	0	0	0	0	1	1	1	1	0	0	0	1	0	0	0	0	0	0	0	0	1	1	1	0	1	1	0	0	0	-	1	1
S28	1	0	1	0	1	1	1	0	1	0	0	0	1	1	1	0	0	0	0	0	0	1	0	1	1	0	0	0	1	0	0	1	0	0	0	0	0	1	1	-	-	1	1	0	0	0	1	1	1
S28	1	0	1	0	1	1	1	0	1	0	0	0	1	1	1	0	0	0	0	0	0	1	1	1	1	0	0	0	1	0	0	1	0	0	0	0	0	1	1	1	0	1	1	0	0	0	1	1	1
S28	1	0	1	0	1	0	1	0	1	0	0	0	1	1	1	0	0	0	0	0	0	1	0	1	0	0	0	0	1	-	0	-	0	0	0	0	0	1	1	-	0	1	1	0	0	0	0	0	1
S28	1	0	0	0	1	1	1	0	1	0	0	0	1	1	1	0	0	0	0	0	0	1	1	1	1	0	0	0	0	0	0	1	0	0	0	0	0	1	1	1	0	1	1	0	0	0	0	1	1
S28	1	0	1	0	1	1	1	0	1	0	0	-	1	0	0	0	0	0	0	0	0	1	1	1	1	0	0	0	1	0	0	1	0	0	0	0	0	1	1	-	-	1	1	0	0	0	-	1	1
S28	0	0	1	0	1	0	1	0	1	0	0	0	1	1	1	0	0	0	0	0	0	0	1	1	1	0	0	0	1	0	0	1	0	0	0	0	0	1	1	0	0	1	0	0	0	0	0	1	1
S28	1	0	1	0	1	1	1	0	1	0	0	0	1	1	1	0	0	0	0	0	0	1	1	1	1	0	0	0	1	0	0	1	0	0	0	0	0	1	1	1	0	0	1	0	0	0	1	0	1
S28	1	0	1	0	1	0	0	0	1	0	0	0	1	1	1	0	0	0	0	0	0	1	1	1	1	0	0	0	1	0	0	1	0	0	0	0	0	1	1	-	0	0	1	0	0	0	0	1	1
S28	1	0	1	0	1	0	1	0	1	0	0	0	1	1	1	0	0	0	0	0	0	1	1	1	1	0	0	0	1	0	0	1	0	0	0	0	0	1	1	1	0	1	1	0	0	0	1	1	1
S28	1	0	1	0	1	0	1	0	1	0	0	0	1	1	1	0	0	0	0	0	0	1	1	1	1	0	0	0	1	0	0	1	0	0	0	0	0	1	1	1	0	1	1	0	0	0	1	1	1
S28	1	0	0	0	0	1	1	0	1	0	0	0	1	1	1	0	0	0	0	0	0	1	1	1	1	0	0	0	1	0	0	1	0	0	0	0	0	1	1	0	0	1	1	0	0	0	1	1	1
S28 Average	0.966667	0	0.9	0	0.966667	0.678571	0.966667	0	0.933333	0	0	0	1	0.9	0.75	0	0	0	0	0	0	0.966667	0.866667	0.866667	0.866667	0	0	0	0.933333	0	0	0.708333	0	0	0	0	0	0.9	1	0.352941	0	0.931034	0.9	0	0	0	0.5	0.733333	1
S29	0	0	0	0	1	1	1	0	1	0	0	1	0	1	1	1	1	0	0	1	0	0	1	1	0	0	1	0	0	0	0	0	0	0	1	1	1	1	0	0	0	1	1	0	1	0	1	0	1
S29	0	1	0	0	1	1	1	0	1	0	0	1	0	1	1	1	1	0	0	1	0	0	1	1	0	0	1	0	0	0	0	0	0	0	1	1	1	1	0	0	0	1	1	0	1	0	1	0	1
S29	0	1	0	0	1	1	1	1	1	0	0	1	0	1	1	1	1	0	1	1	0	0	1	1	0	0	1	0	0	0	0	0	0	0	1	1	1	1	0	0	0	1	1	0	1	0	1	0	1
S29	0	1	0	0	1	1	1	1	1	0	0	1	0	1	1	1	1	0	1	1	0	0	1	1	0	0	1	0	0	0	0	0	0	0	1	1	1	1	0	0	0	1	1	0	1	0	1	0	1
S29	0	1	0	0	1	1	1	0	1	0	0	1	0	1	1	1	1	0	0	1	0	0	1	1	0	0	1	0	0	0	0	0	0	0	1	1	1	1	0	0	0	1	1	0	1	0	1	0	1
S29	1	1	1	1	1	1	1	1	0	-	1	0	0	0	0	1	0	-	1	1	1	1	1	0	0	1	1	0	1	1	0	-	0	-	1	1	1	1	0	-	0	-	1	1	1	0	1	-	1
S29 Average	0.166667	0.833333	0.166667	0.166667	1	1	1	0.5	0.833333	0	0.166667	0.833333	0	0.833333	0.833333	1	0.833333	0	0.5	1	0.166667	0.166667	1	0.833333	0	0.166667	1	0	0.166667	0.166667	0	0	0	0	1	1	1	1	0	0	0	1	1	0.166667	1	0	1	0	1
S30	1	1	0	0	1	0	1	0	1	1	1	1	0	0	0	1	0	0	0	1	1	0	1	0	1	1	1	1	1	1	1	1	1	0	1	1	0	1	0	0	-	0	0	1	0	0	0	0	1
S30	1	1	0	0	1	0	1	0	1	1	1	1	0	0	0	1	0	0	0	1	1	0	1	0	1	1	1	1	1	1	1	1	1	0	1	1	0	1	0	1	0	0	0	1	0	0	1	0	1
S30	1	1	0	0	1	0	1	0	1	1	1	1	0	0	0	1	0	0	0	1	1	0	1	0	1	1	1	1	1	1	1	1	1	0	1	1	0	1	0	1	0	0	0	1	0	0	1	0	1
S30	0	1	0	0	1	0	1	0	1	1	1	1	0	0	0	1	0	0	0	1	1	0	1	0	1	1	1	1	1	0	1	1	1	0	1	1	0	1	0	0	0	0	0	1	0	0	1	0	1
S30	1	1	0	0	1	0	1	0	1	1	1	0	0	0	0	1	0	0	0	1	1	0	0	0	1	1	1	1	0	0	1	0	1	0	1	1	0	1	0	0	0	0	0	1	0	0	1	0	1
S30	1	1	1	0	1	0	1	0	0	1	1	1	0	0	0	1	0	0	0	0	0	0	1	0	1	1	1	1	0	0	1	0	1	0	1	1	0	1	0	0	0	0	0	0	0	0	0	0	0
S30	1	1	1	0	1	0	1	0	0	1	1	1	0	0	0	1	0	0	0	0	0	0	1	0	1	1	1	1	0	0	1	0	1	0	1	1	0	1	0	0	0	0	0	0	0	0	0	0	0
S30	1	1	1	0	1	0	1	0	1	1	1	1	0	0	0	1	0	0	0	1	1	0	1	0	1	1	1	1	1	1	1	1	1	0	1	1	0	1	0	0	0	0	0	1	0	0	1	0	1
S30	0	1	0	0	0	0	1	0	1	1	1	1	0	0	0	1	0	0	0	1	1	0	1	0	0	1	1	1	1	1	1	1	1	0	1	1	0	1	0	0	-	0	0	1	0	0	1	0	1
S30	0	1	0	0	0	0	1	0	1	1	1	1	0	0	0	1	0	0	0	1	1	0	1	0	0	1	1	1	1	1	1	1	1	0	1	1	0	1	0	0	-	0	0	1	0	0	1	0	1
S30	1	0	0	0	1	0	1	0	1	1	1	0	0	0	0	1	0	0	0	1	1	0	1	0	1	1	1	1	1	0	1	-	1	0	1	1	0	1	0	1	0	0	0	1	0	0	0	0	1
S30	1	1	0	0	1	0	1	0	1	1	1	1	0	0	0	1	0	0	0	1	1	0	1	0	1	1	1	1	1	1	1	0	1	0	1	1	0	1	0	0	0	0	0	1	0	0	1	0	1
S30	0	0	1	1	1	1	1	1	0	0	1	0	1	0	1	0	0	0	0	1	1	0	1	0	0	0	0	0	1	0	1	1	0	1	1	0	0	1	1	0	0	0	0	1	0	0	0	0	0
S30 Average	0.692308	0.846154	0.307692	0.0769231	0.846154	0.0769231	1	0.0769231	0.769231	0.923077	1	0.769231	0.0769231	0	0.0769231	0.923077	0	0	0	0.846154	0.846154	0	0.923077	0	0.769231	0.923077	0.923077	0.923077	0.769231	0.538462	1	0.666667	0.923077	0.0769231	1	0.923077	0	1	0.0769231	0.230769	0	0	0	0.846154	0	0	0.615385	0	0.769231
S31	0	0	0	1	1	1	0	0	0	1	1	-	0	0	-	0	1	0	0	0	1	0	1	1	1	1	0	1	0	0	1	0	1	0	1	1	0	0	0	0	0	0	0	0	0	1	0	0	1
S31	0	0	0	1	1	0	0	0	0	1	1	1	0	0	0	0	1	0	0	0	1	1	1	0	1	1	0	1	0	0	1	0	1	0	1	1	0	0	0	0	0	0	0	1	0	1	1	0	1
S31	0	0	0	1	1	1	0	0	0	1	1	1	0	0	1	0	1	0	0	0	1	0	1	0	0	1	0	1	0	0	1	1	1	0	1	0	0	0	0	0	0	0	0	1	0	1	1	0	1
S31	0	0	0	1	1	1	0	0	0	1	1	0	0	0	-	0	-	0	0	0	1	0	1	0	1	0	0	1	0	0	1	-	1	-	1	0	0	0	0	0	-	0	0	1	0	1	1	0	0
S31	0	0	0	1	1	1	0	0	0	1	1	1	0	0	1	0	1	0	0	0	1	0	1	0	1	1	0	1	0	0	1	1	1	0	1	1	0	0	0	1	0	0	0	1	0	1	1	0	1
S31 Average	0	0	0	1	1	0.8	0	0	0	1	1	0.75	0	0	0.666667	0	1	0	0	0	1	0.2	1	0.2	0.8	0.8	0	1	0	0	1	0.5	1	0	1	0.6	0	0	0	0.2	0	0	0	0.8	0	1	0.8	0	0.8
S32	1	1	1	1	0	1	1	0	0	1	0	1	0	1	1	1	0	0	0	0	0	1	0	0	0	1	0	1	0	1	1	1	1	0	0	0	0	0	0	-	-	0	0	1	1	1	0	0	1
S32	1	1	1	1	0	1	1	0	0	0	0	1	0	1	0	1	1	0	0	0	0	1	0	0	0	1	0	1	0	1	1	0	1	0	0	0	0	0	0	1	0	0	0	1	1	1	1	0	1
S32 Average	1	1	1	1	0	1	1	0	0	0.5	0	1	0	1	0.5	1	0.5	0	0	0	0	1	0	0	0	1	0	1	0	1	1	0.5	1	0	0	0	0	0	0	1	0	0	0	1	1	1	0.5	0	1
S33	1	1	0	1	0	0	1	0	1	0	0	0	0	1	0	0	1	1	1	0	0	1	0	0	1	0	1	1	1	0	0	1	1	0	0	0	1	1	0	1	1	0	0	1	1	0	0	0	1
S33	1	1	0	1	0	0	1	0	1	0	0	0	0	1	0	0	1	1	1	0	0	1	0	0	1	0	1	1	1	0	0	1	1	0	0	0	1	1	0	1	0	0	0	1	1	0	0	0	1
S33	1	1	0	1	0	0	1	0	1	0	0	0	0	1	0	0	1	1	1	0	0	1	0	0	1	0	1	1	1	0	0	1	1	0	0	0	1	1	0	-	-	0	0	1	1	0	0	0	1
S33	1	1	0	1	0	0	1	0	1	0	0	0	0	1	0	0	1	1	1	0	0	1	0	0	1	0	1	1	1	0	0	1	1	0	0	0	1	1	0	0	1	0	0	1	1	0	0	0	1
S33	1	1	0	1	0	0	1	0	1	0	0	0	0	0	0	0	1	1	1	0	0	1	0	0	1	0	1	1	1	0	0	1	1	0	0	0	1	1	0	0	1	0	0	1	1	0	0	0	1
S33	1	1	0	1	0	0	1	0	1	0	0	0	0	0	0	0	1	1	1	0	0	1	0	0	1	0	1	1	1	0	0	1	1	0	0	0	1	1	0	0	1	0	0	1	1	0	0	0	1
S33	0	0	0	1	0	1	0	1	1	1	1	-	0	0	0	0	0	0	0	0	1	1	1	1	0	0	0	1	1	0	1	-	1	0	0	0	1	1	1	-	-	-	1	0	0	0	-	0	1
S33	1	1	0	1	0	0	1	0	1	0	0	0	0	1	0	0	1	1	1	0	0	1	0	0	1	0	1	1	1	0	0	1	1	0	0	0	1	1	0	1	1	0	0	1	1	0	0	0	1
S33	1	1	0	1	0	0	1	0	1	0	0	0	0	1	0	0	1	1	1	0	0	1	0	0	1	0	1	1	1	0	0	1	1	0	0	0	1	1	0	1	1	0	0	1	1	0	0	0	1
S33	1	1	0	1	0	0	1	0	1	0	0	0	0	1	0	0	1	1	1	0	0	1	0	0	1	0	1	1	1	0	0	1	1	0	0	0	1	1	0	1	1	0	0	1	1	0	0	0	1
S33	1	1	0	1	0	0	1	0	1	0	0	0	0	1	0	0	1	1	1	0	0	1	0	0	1	0	1	1	1	0	0	1	1	0	0	0	1	1	0	1	1	0	0	1	1	0	0	0	1
S33	1	1	0	1	0	0	1	0	1	0	0	0	0	1	0	0	1	1	1	0	0	1	0	0	1	0	1	1	1	0	0	1	1	0	0	0	1	1	0	1	1	0	0	1	1	0	0	0	1
S33	1	1	0	1	0	0	1	0	1	0	0	0	0	1	0	0	1	1	1	0	0	1	0	0	1	0	1	1	1	0	0	1	1	0	0	0	1	1	0	1	1	0	0	1	1	0	0	0	1
S33	1	1	0	1	0	0	1	0	1	0	0	0	0	1	0	0	1	1	1	0	0	1	0	0	1	0	1	1	1	0	0	1	1	0	0	0	1	1	0	-	1	0	0	1	1	0	0	0	1
S33	1	1	0	1	0	0	1	0	0	0	0	0	0	1	0	0	1	1	1	0	0	1	0	0	1	0	1	1	1	0	0	0	1	0	0	0	1	1	0	1	0	0	0	1	1	0	0	0	1
S33	1	1	0	1	0	0	1	0	0	0	0	0	0	1	0	0	1	1	1	0	0	1	0	0	1	0	1	1	1	0	0	0	1	0	0	0	1	1	0	1	0	0	0	1	1	0	0	0	1
S33 Average	0.9375	0.9375	0	1	0	0.0625	0.9375	0.0625	0.875	0.0625	0.0625	0	0	0.8125	0	0	0.9375	0.9375	0.9375	0	0.0625	1	0.0625	0.0625	0.9375	0	0.9375	1	1	0	0.0625	0.866667	1	0	0	0	1	1	0.0625	0.769231	0.785714	0	0.0625	0.9375	0.9375	0	0	0	1
S34	0	1	0	0	0	0	0	0	0	1	1	1	0	0	1	0	1	1	1	0	1	0	0	0	0	1	0	0	0	0	0	1	1	1	0	0	0	1	0	0	0	1	0	0	1	0	1	0	1
S34	0	1	0	0	0	0	0	0	0	1	1	1	0	0	1	0	1	1	1	0	1	0	0	0	0	1	0	0	0	0	0	1	1	1	0	0	0	1	0	0	0	1	0	0	1	0	1	0	1
S34	0	1	0	0	0	0	0	0	0	1	1	1	0	0	1	0	1	1	1	0	1	0	0	0	0	1	0	0	0	0	0	1	1	1	0	0	0	1	0	0	-	1	0	0	1	0	0	0	1
S34	0	1	0	0	0	0	0	0	0	1	1	1	0	0	1	0	1	1	1	0	1	0	0	0	0	1	0	0	0	0	0	1	1	1	0	0	0	1	0	0	-	1	0	0	1	0	0	0	1
S34	0	-	1	1	0	1	0	0	0	1	1	0	0	0	-	0	1	0	1	1	1	0	0	0	0	1	0	1	0	-	0	0	1	0	1	1	1	0	0	-	-	0	1	-	0	0	0	1	1
S34	0	1	0	0	0	0	0	0	0	1	1	1	0	0	1	0	1	1	1	0	1	0	0	0	0	1	0	0	0	0	0	1	1	1	0	0	0	1	0	0	0	1	0	0	1	0	1	0	1
S34	0	1	0	0	0	0	0	0	0	1	1	1	0	0	1	0	1	1	1	0	1	0	0	0	0	1	0	0	0	0	0	1	1	1	0	0	0	1	0	0	0	1	0	0	1	0	1	0	1
S34	0	1	0	0	0	0	0	0	0	1	1	1	0	0	1	0	1	0	1	0	1	0	0	0	0	1	0	0	0	0	0	1	1	1	0	0	0	1	0	0	0	0	0	0	1	0	1	0	1
S34	0	1	0	0	0	0	0	0	0	1	1	1	0	0	1	0	1	0	1	0	1	0	0	0	0	1	0	0	0	0	0	1	1	1	0	0	0	1	0	0	0	0	0	0	1	0	1	0	1
S34	0	1	0	0	0	0	0	0	0	1	1	1	0	0	1	0	1	1	1	0	1	0	0	0	0	1	0	0	0	0	0	1	1	1	0	0	0	1	0	0	0	1	0	0	1	0	1	0	1
S34	0	1	0	0	0	0	0	0	0	1	1	1	0	0	1	0	1	1	1	0	1	0	0	0	0	1	0	0	0	0	0	1	1	1	0	0	0	1	0	0	0	1	0	0	1	0	1	0	1
S34	0	1	0	0	0	0	0	0	0	1	1	1	0	0	1	0	1	1	1	0	1	0	0	0	0	1	0	0	0	0	0	1	1	1	0	0	0	1	0	0	0	1	0	0	1	0	1	0	1
S34 Average	0	1	0.0833333	0.0833333	0	0.0833333	0	0	0	1	1	0.916667	0	0	1	0	1	0.75	1	0.0833333	1	0	0	0	0	1	0	0.0833333	0	0	0	0.916667	1	0.916667	0.0833333	0.0833333	0.0833333	0.916667	0	0	0	0.75	0.0833333	0	0.916667	0	0.75	0.0833333	1
S35	1	0	1	0	1	0	0	1	1	0	0	0	1	1	0	0	0	0	0	0	1	1	1	0	1	0	0	0	1	1	0	1	0	1	0	0	0	1	1	-	1	0	1	0	1	0	1	1	1
S35	1	0	1	0	1	0	0	0	1	0	0	0	1	1	0	0	0	0	0	0	1	1	1	0	1	0	0	0	1	1	0	1	0	1	0	0	0	1	1	-	1	0	1	0	1	0	0	1	1
S35	1	0	1	0	1	0	0	0	1	0	0	0	1	1	0	0	0	0	0	0	1	1	1	0	1	0	0	0	0	0	0	1	0	1	0	0	0	1	1	-	0	0	1	0	0	0	0	0	1
S35	1	0	1	0	1	0	0	0	1	0	0	0	1	1	0	0	0	0	0	0	1	1	1	0	1	0	0	0	1	1	0	1	0	1	0	0	0	1	1	-	1	0	1	0	1	0	0	1	1
S35	1	0	1	0	0	0	0	1	0	1	0	0	0	0	0	1	0	0	0	0	1	0	0	0	0	1	0	0	0	0	-	0	0	0	0	1	1	1	0	0	0	0	1	1	0	1	-	0	0
S35	1	1	1	0	0	0	1	1	1	1	1	0	0	0	1	1	0	0	1	1	1	0	1	1	1	1	1	1	1	0	1	0	1	1	1	1	1	1	0	0	0	1	1	1	0	1	-	0	1
S35	0	0	0	0	0	1	0	0	0	0	1	0	0	0	1	1	0	0	1	0	0	0	0	1	0	0	0	0	0	0	1	0	0	1	0	0	1	0	0	0	1	0	1	1	0	0	-	0	1
S35	1	0	1	0	1	0	0	1	1	0	0	0	1	1	0	0	0	0	0	0	1	1	1	0	0	0	0	0	1	1	0	0	0	1	0	0	0	1	1	0	0	0	1	0	1	0	-	0	1
S35	0	0	0	0	1	0	0	0	1	0	0	1	0	1	1	0	1	0	0	0	0	0	1	0	0	0	0	1	0	0	0	0	1	0	0	0	1	0	0	1	1	0	0	1	1	0	0	1	1
S35	0	0	0	0	1	0	0	0	1	0	0	1	0	1	1	0	1	0	0	0	0	0	1	0	0	0	0	1	0	0	0	0	1	0	0	0	1	0	0	1	1	0	0	1	1	0	0	1	1
S35	1	0	1	0	1	0	0	1	1	0	0	0	1	1	0	0	0	0	0	0	1	1	1	0	1	0	0	0	1	1	0	1	0	1	0	0	0	1	1	1	1	0	1	0	1	0	1	1	1
S35	1	0	1	0	1	0	0	1	1	0	0	0	1	1	-	0	0	0	0	0	1	1	1	0	1	0	0	0	1	1	0	1	0	0	0	0	0	1	1	0	1	0	1	0	1	0	0	0	1
S35	1	0	1	0	1	0	0	1	1	0	0	0	1	1	-	0	0	0	0	0	1	1	1	0	1	0	0	0	1	1	0	1	0	0	0	0	0	1	1	0	1	0	1	0	1	0	0	0	1
S35	1	0	1	0	1	0	0	1	1	0	0	0	1	1	-	0	0	0	0	0	1	1	1	0	1	0	0	0	0	0	0	1	0	0	0	0	0	1	1	0	0	0	1	0	0	0	0	0	1
S35	1	0	0	0	1	0	0	1	0	0	0	0	1	1	0	0	0	0	0	0	1	1	1	0	1	0	0	0	1	1	0	1	0	1	0	0	0	1	1	0	1	0	1	0	1	0	1	1	1
S35	0	0	1	0	1	0	0	0	1	0	0	0	1	1	0	0	0	0	0	0	1	1	1	0	0	0	0	0	1	0	0	0	0	1	0	0	0	1	1	0	0	0	1	0	1	0	1	1	1
S35	1	0	1	0	1	0	0	1	1	0	0	0	1	-	0	0	0	0	0	0	1	1	1	0	1	0	0	0	1	1	0	1	0	0	0	0	0	1	1	1	1	0	1	0	0	0	-	0	1
S35	1	0	0	0	1	0	0	1	1	0	0	0	1	1	0	0	0	0	0	0	1	1	1	0	1	0	0	0	1	1	0	0	0	1	0	0	0	1	0	0	1	0	1	0	1	0	1	1	1
S35	1	0	1	0	1	0	0	1	1	0	0	0	1	1	0	0	0	0	0	0	1	1	1	0	1	0	0	0	1	1	0	1	0	1	0	0	0	1	1	1	1	0	1	0	1	0	1	1	1
S35	1	0	1	0	1	0	0	1	1	0	0	0	1	1	0	0	0	0	0	0	1	1	1	0	1	0	0	0	1	1	0	1	0	1	0	0	0	1	1	1	1	0	1	0	1	0	1	1	1
S35	1	0	1	0	1	0	0	1	1	0	0	0	1	1	0	0	0	0	0	0	1	1	1	0	1	0	0	0	1	1	0	1	0	1	0	0	0	1	1	1	1	0	1	0	1	0	1	1	1
S35 Average	0.809524	0.047619	0.761905	0	0.857143	0.047619	0.047619	0.666667	0.857143	0.0952381	0.0952381	0.0952381	0.761905	0.85	0.222222	0.142857	0.0952381	0	0.0952381	0.047619	0.857143	0.761905	0.904762	0.0952381	0.714286	0.0952381	0.047619	0.142857	0.714286	0.619048	0.1	0.619048	0.142857	0.666667	0.047619	0.0952381	0.238095	0.857143	0.714286	0.411765	0.714286	0.047619	0.904762	0.238095	0.714286	0.0952381	0.5	0.571429	0.952381
S36	0	0	1	1	0	1	0	0	0	0	1	1	0	1	1	1	1	0	0	0	0	1	0	0	0	1	1	1	0	1	1	1	1	0	0	0	0	0	0	1	0	1	0	0	1	1	1	0	0
S36	0	0	1	1	0	0	0	0	0	0	1	1	0	1	0	1	1	0	0	0	0	1	0	0	0	1	1	1	0	1	1	0	1	0	0	0	0	0	0	1	0	1	0	0	1	1	1	0	0
S36	0	0	1	1	0	1	0	0	0	0	1	1	0	1	1	1	1	0	0	0	0	1	0	0	0	1	1	1	0	1	1	1	1	0	0	0	0	0	0	1	0	1	0	0	1	1	1	0	0
S36	0	0	1	1	0	0	0	0	0	0	1	1	0	1	1	1	1	0	0	0	0	1	0	0	0	1	1	1	0	0	1	1	0	0	0	0	0	0	0	0	0	1	0	0	0	0	1	0	0
S36	0	0	0	1	0	1	0	0	0	0	1	1	0	1	0	1	1	0	0	0	0	1	0	0	0	1	1	1	0	0	1	1	1	0	0	0	0	0	0	1	0	1	0	0	1	1	0	0	0
S36	0	0	0	1	0	1	0	0	0	0	1	1	0	1	0	1	1	0	0	0	0	1	0	0	0	1	1	1	0	0	1	1	1	0	0	0	0	0	0	1	0	1	0	0	1	1	0	0	0
S36	0	0	0	1	0	1	0	0	0	0	1	1	0	1	0	1	1	0	0	0	0	1	0	0	0	1	1	1	0	0	1	1	1	0	0	0	0	0	0	1	0	1	0	0	1	1	0	0	0
S36	0	0	1	1	0	1	0	0	0	0	1	0	0	1	1	1	1	0	0	0	0	1	0	0	0	1	1	1	0	1	1	0	1	0	0	0	0	0	0	-	0	1	0	0	1	1	0	0	0
S36	0	0	1	1	0	1	0	0	0	0	1	1	0	1	1	1	1	0	0	0	0	1	0	0	0	1	1	1	0	0	1	1	0	0	0	0	0	0	0	0	0	1	0	0	0	0	1	0	0
S36	0	0	1	1	0	1	0	0	0	0	1	1	0	1	1	1	1	0	0	0	0	1	0	0	0	1	1	1	0	0	1	1	0	0	0	0	0	0	0	0	0	1	0	0	0	0	1	0	0
S36	0	0	1	1	0	1	0	0	0	0	1	1	0	1	1	1	1	0	0	0	0	1	0	0	0	1	1	1	0	1	1	1	1	0	0	0	0	0	0	1	0	1	0	0	1	1	0	0	0
S36	0	0	1	1	0	1	0	0	0	0	1	0	0	1	1	1	1	0	0	0	0	1	0	0	0	1	1	1	0	1	1	1	1	0	0	0	0	0	0	0	0	1	0	0	1	1	1	0	0
S36	0	0	1	1	0	1	0	0	0	0	1	1	0	1	1	1	1	0	0	0	0	1	0	0	0	1	1	1	0	1	1	1	1	0	0	0	0	0	0	1	0	1	0	0	1	1	1	0	0
S36	0	0	1	1	0	1	0	0	0	0	1	1	0	1	1	1	1	0	0	0	0	1	0	0	0	1	1	1	0	1	1	1	1	0	0	0	0	0	0	1	0	1	0	0	1	1	1	0	0
S36	0	0	1	1	0	1	0	0	0	0	1	1	0	1	1	1	1	0	0	0	0	1	0	0	0	1	1	1	0	1	1	1	1	0	0	0	0	0	0	1	0	1	0	0	1	1	1	0	0
S36	0	0	1	1	0	1	0	0	0	0	1	1	0	1	1	1	0	0	0	0	0	1	0	0	0	1	1	1	0	1	1	1	0	0	0	0	0	0	0	0	0	1	0	0	0	0	0	0	0
S36 Average	0	0	0.8125	1	0	0.875	0	0	0	0	1	0.875	0	1	0.75	1	0.9375	0	0	0	0	1	0	0	0	1	1	1	0	0.625	1	0.875	0.75	0	0	0	0	0	0	0.666667	0	1	0	0	0.75	0.75	0.625	0	0
S37	0	1	0	0	0	0	0	0	0	0	1	1	0	0	1	0	1	1	1	0	1	0	0	0	0	0	0	0	0	0	0	1	1	0	0	0	0	1	0	-	0	0	0	0	1	0	0	0	1
S37	0	1	0	0	0	0	0	0	0	0	1	0	0	0	1	0	1	1	1	0	1	0	0	0	0	0	0	0	0	0	0	1	1	1	0	0	0	1	0	0	0	1	0	0	1	0	1	0	1
S37	0	1	0	0	0	0	0	0	0	0	1	1	0	0	1	0	1	1	1	0	1	0	0	0	0	0	0	0	0	0	0	1	0	1	0	0	0	1	0	0	0	1	0	0	0	0	1	0	1
S37	0	1	0	0	0	0	0	0	0	0	1	1	0	0	1	0	1	1	1	0	1	0	0	0	0	0	0	0	0	0	0	1	0	1	0	0	0	1	0	0	0	1	0	0	0	0	1	0	1
S37	0	1	0	0	0	0	0	0	0	0	1	1	0	0	1	0	1	1	1	0	1	0	0	0	0	0	0	0	0	0	0	1	1	1	0	0	0	1	0	0	0	1	0	0	1	0	1	0	1
S37	0	1	0	0	0	0	0	0	0	0	1	1	0	0	1	0	1	1	1	0	1	0	0	0	0	0	0	0	0	0	0	1	1	1	0	0	0	1	0	-	0	1	0	0	1	0	0	0	1
S37	0	1	0	0	0	0	0	0	0	0	1	1	0	0	1	0	0	1	1	0	1	0	0	0	0	0	0	0	0	0	0	1	1	0	0	0	0	1	0	0	0	1	0	0	1	0	0	0	1
S37	0	1	0	0	0	0	0	0	0	0	1	1	0	0	1	0	1	1	1	0	1	0	0	0	0	0	0	0	0	0	0	1	0	1	0	0	0	1	0	0	0	1	0	0	0	0	1	0	1
S37	0	1	0	0	0	0	0	0	0	0	1	1	0	0	1	0	1	1	1	0	1	0	0	0	0	0	0	0	0	0	0	1	0	1	0	0	0	1	0	0	0	1	0	0	0	0	1	0	1
S37	0	1	0	0	0	0	0	0	0	0	1	1	0	0	1	0	1	1	1	0	1	0	0	0	0	0	0	0	0	0	0	1	1	1	0	0	0	1	0	0	0	1	0	0	1	0	1	0	1
S37	0	1	0	0	0	0	0	0	0	0	1	1	0	0	1	0	1	1	1	0	1	0	0	0	0	0	0	0	0	0	0	1	1	1	0	0	0	1	0	0	0	1	0	0	1	0	1	0	1
S37	0	1	0	0	0	0	0	0	0	0	1	1	0	0	1	0	1	1	1	0	1	0	0	0	0	0	0	0	0	0	0	1	1	1	0	0	0	1	0	0	0	1	0	0	1	0	1	0	1
S37	0	1	0	0	0	0	0	0	0	0	1	1	0	0	1	0	1	1	1	0	1	0	0	0	0	0	0	0	0	0	0	0	1	1	0	0	0	1	0	0	0	1	0	0	1	0	1	0	1
S37	0	1	0	0	0	0	0	0	0	0	1	0	0	0	1	0	1	1	1	0	1	0	0	0	0	0	0	0	0	0	0	1	1	1	0	0	0	1	0	0	0	1	0	0	1	0	0	0	1
S37	0	1	0	0	0	0	0	0	0	0	1	0	0	0	1	0	1	1	1	0	1	0	0	0	0	0	0	0	0	0	0	1	1	1	0	0	0	1	0	0	0	1	0	0	1	0	0	0	1
S37	0	1	0	0	0	0	0	0	0	0	1	1	0	0	1	0	1	1	1	0	1	0	0	0	0	0	0	0	0	0	0	0	1	1	0	0	0	1	0	0	0	1	0	0	1	0	1	0	1
S37	0	1	0	0	0	0	0	0	0	0	1	1	0	0	1	0	1	1	1	0	1	0	0	0	0	0	0	0	0	0	0	0	1	1	0	0	0	1	0	0	0	1	0	0	1	0	1	0	1
S37 Average	0	1	0	0	0	0	0	0	0	0	1	0.823529	0	0	1	0	0.941176	1	1	0	1	0	0	0	0	0	0	0	0	0	0	0.823529	0.764706	0.882353	0	0	0	1	0	0	0	0.941176	0	0	0.764706	0	0.705882	0	1
S38	0	0	0	1	0	1	0	0	0	0	1	1	0	0	1	0	0	0	0	0	1	0	1	0	1	1	0	1	0	0	0	1	0	0	1	1	-	0	0	0	0	0	0	1	0	0	1	0	1
S38	0	0	0	1	1	1	0	0	0	1	1	1	0	0	0	0	0	0	0	0	0	0	1	0	1	0	0	1	0	0	1	-	1	0	1	1	0	0	0	1	-	0	0	0	0	1	0	0	1
S38	0	0	0	1	1	1	0	0	0	1	1	1	0	0	1	0	1	0	0	0	1	0	1	0	1	1	0	1	0	0	1	1	1	0	1	1	0	0	0	0	0	0	0	1	0	1	1	0	1
S38	0	0	0	1	1	1	0	0	0	1	1	1	0	0	1	0	1	0	0	0	1	0	1	0	1	1	0	1	0	0	1	1	1	0	1	1	0	0	0	1	0	0	0	1	0	1	1	0	1
S38	0	0	0	1	1	1	0	0	0	0	1	1	0	0	1	0	1	0	0	0	1	0	1	0	1	1	0	1	0	0	1	0	1	0	1	1	0	0	0	0	0	0	0	1	0	1	1	0	1
S38	0	0	0	1	1	1	0	0	0	0	1	1	0	0	1	0	1	0	0	0	1	0	1	0	1	1	0	1	0	0	1	0	1	0	1	1	0	0	0	0	0	0	0	1	0	1	1	0	1
S38	0	0	0	1	0	1	0	0	0	1	1	1	0	0	1	0	1	0	0	0	1	0	1	0	1	1	0	1	0	0	1	1	0	0	1	1	0	0	0	0	0	0	0	1	0	0	1	0	1
S38	0	0	0	1	1	1	0	0	0	1	1	1	0	0	1	0	1	0	0	0	1	0	1	0	1	1	0	1	0	0	1	1	1	0	1	1	0	0	0	1	0	0	0	1	0	1	1	0	1
S38	1	1	0	0	0	1	0	0	0	1	0	1	1	0	0	1	0	1	0	0	0	1	0	0	1	0	1	1	1	1	0	0	0	0	0	0	0	1	0	0	0	0	0	0	0	1	0	1	0
S38	0	0	0	1	1	1	0	0	0	1	1	1	0	0	1	0	1	0	0	0	1	0	1	0	1	1	0	1	0	0	1	1	1	0	1	1	0	0	0	1	0	0	0	1	0	1	1	0	1
S38	0	0	0	1	1	1	0	0	0	1	1	1	0	0	1	0	1	0	0	0	1	0	1	0	1	1	0	1	0	0	1	1	1	0	1	1	0	0	0	1	0	0	0	1	0	1	1	0	1
S38	0	0	0	1	1	0	0	0	0	1	1	1	0	0	1	0	1	0	0	0	1	0	1	0	1	1	0	1	0	0	1	0	1	0	1	1	0	0	0	0	0	0	0	1	0	1	1	0	1
S38	0	0	0	1	1	1	0	0	0	1	1	1	0	0	1	0	1	0	0	0	1	0	1	0	1	1	0	1	0	0	1	0	1	0	1	1	0	0	0	1	0	0	0	1	0	1	0	0	1
S38	0	0	0	1	1	1	0	0	0	1	1	1	0	0	1	0	1	0	0	0	1	0	1	0	1	1	0	1	0	0	1	0	1	0	1	1	0	0	0	1	0	0	0	1	0	1	0	0	1
S38	0	1	0	1	0	0	0	1	1	1	1	0	0	0	1	0	0	0	1	1	0	1	0	1	0	1	0	1	0	1	1	0	0	1	1	1	0	1	0	-	0	0	0	0	0	0	-	1	0
S38	1	1	0	1	1	0	1	1	1	-	1	0	1	-	0	1	1	0	1	1	1	0	1	1	1	0	1	0	1	1	-	1	1	1	1	1	0	1	1	-	0	1	1	1	1	0	-	1	1
S38	0	0	0	1	1	1	0	0	0	1	1	1	0	0	1	0	1	0	0	0	1	0	1	0	1	1	0	1	0	0	1	1	1	0	1	1	0	0	0	1	0	0	0	1	0	1	0	0	1
S38	0	0	0	1	1	1	0	0	0	1	1	1	0	0	1	0	1	0	0	0	1	0	0	0	1	1	0	1	0	0	1	1	1	0	1	1	0	0	0	1	0	0	0	1	0	1	1	0	1
S38 Average	0.111111	0.166667	0	0.944444	0.777778	0.833333	0.0555556	0.111111	0.111111	0.823529	0.944444	0.888889	0.111111	0	0.833333	0.111111	0.777778	0.0555556	0.111111	0.111111	0.833333	0.111111	0.833333	0.111111	0.944444	0.833333	0.111111	0.944444	0.111111	0.166667	0.882353	0.588235	0.777778	0.111111	0.944444	0.944444	0	0.166667	0.0555556	0.5625	0	0.0555556	0.0555556	0.833333	0.0555556	0.777778	0.6875	0.166667	0.888889
S39	0	0	0	1	1	1	0	0	0	0	0	0	1	1	1	0	0	0	0	0	0	1	1	0	1	0	0	0	1	0	1	1	0	0	1	1	0	1	1	0	0	1	1	0	0	0	1	0	1
S39	0	0	0	1	1	1	0	0	0	0	0	0	1	1	0	0	0	0	0	0	0	1	1	0	1	0	0	0	1	0	1	1	0	0	1	1	0	1	1	1	0	1	1	0	0	0	1	1	1
S39	0	0	0	1	1	1	0	0	0	0	0	0	1	1	1	0	0	0	0	0	0	0	1	0	1	0	0	0	0	0	1	0	0	0	1	1	0	1	1	0	0	0	1	0	0	0	0	0	0
S39	0	0	0	1	1	1	0	0	0	0	0	0	1	1	1	0	0	0	0	0	0	1	1	1	1	0	0	0	1	0	1	1	0	0	1	1	0	1	1	1	0	1	1	0	0	0	0	1	0
S39	0	0	0	1	1	1	0	0	0	0	0	0	1	1	1	0	0	0	0	0	0	1	1	1	1	0	0	0	1	0	1	1	0	0	1	1	0	1	1	1	0	1	1	0	0	0	0	1	0
S39	0	0	0	1	1	1	0	0	0	0	0	0	1	1	1	0	0	0	0	0	0	0	1	0	1	0	0	0	0	0	1	0	0	0	1	1	0	1	1	0	0	0	1	0	0	0	0	0	0
S39	0	0	0	1	1	1	0	0	0	0	0	0	1	1	0	0	0	0	0	0	0	1	1	1	1	0	0	0	1	0	1	1	0	0	1	1	0	1	1	-	0	1	1	0	0	0	0	1	1
S39	0	0	0	1	1	0	0	0	0	0	0	0	1	0	1	0	0	0	0	0	0	1	1	1	1	0	0	0	1	0	1	1	0	0	1	1	0	1	1	0	0	1	1	0	0	0	1	1	0
S39	0	0	0	1	1	1	0	0	0	0	0	0	1	1	1	0	0	0	0	0	0	1	1	1	1	0	0	0	1	0	1	-	0	0	1	1	0	1	1	0	0	1	1	0	0	0	1	1	1
S39	0	0	0	1	1	1	0	0	0	0	0	0	1	1	1	0	0	0	0	0	0	1	1	1	1	0	0	0	1	0	1	-	0	0	1	1	0	1	1	0	0	1	1	0	0	0	1	1	1
S39	0	0	0	1	1	0	0	0	0	0	0	0	1	1	1	0	0	0	0	0	0	1	1	1	1	0	0	0	1	0	0	-	0	-	1	1	0	0	1	-	0	1	1	0	0	0	0	1	1
S39	0	0	0	1	1	0	0	0	0	0	0	0	1	1	1	0	0	0	0	0	0	1	1	1	1	0	0	0	1	0	0	-	0	-	1	1	0	0	1	-	0	1	1	0	0	0	0	1	1
S39 Average	0	0	0	1	1	0.75	0	0	0	0	0	0	1	0.916667	0.833333	0	0	0	0	0	0	0.833333	1	0.666667	1	0	0	0	0.833333	0	0.833333	0.75	0	0	1	1	0	0.833333	1	0.333333	0	0.833333	1	0	0	0	0.416667	0.75	0.583333
S40	1	1	1	1	0	0	1	0	1	1	1	0	0	1	0	0	0	1	1	0	0	1	0	0	1	0	1	1	0	0	0	0	1	0	0	0	1	1	0	-	0	0	1	1	1	0	0	1	1
S40	1	1	1	1	0	0	1	0	1	1	1	0	0	1	0	0	0	1	1	0	0	1	0	0	1	0	1	1	0	0	0	1	1	0	0	0	1	1	0	1	1	0	1	1	1	0	0	1	1
S40	1	1	1	1	0	-	1	0	0	0	1	0	0	1	0	0	-	1	1	0	0	1	0	0	1	0	1	1	0	0	0	0	1	0	0	0	1	1	0	0	-	0	1	1	1	0	0	1	0
S40	1	1	1	1	0	0	1	0	1	1	1	0	0	1	0	0	0	1	1	0	0	1	0	0	1	0	1	1	0	0	0	0	1	0	0	0	1	1	0	0	0	0	1	1	1	0	0	1	1
S40	1	1	1	1	0	0	1	0	1	1	1	0	0	1	0	0	0	1	1	0	0	1	0	0	1	0	1	1	0	0	0	0	1	0	0	0	1	1	0	0	0	0	1	1	1	0	0	1	1
S40	1	1	1	1	0	0	1	0	1	1	1	0	0	1	0	0	0	1	1	0	0	1	0	0	1	0	1	1	0	0	0	1	1	0	0	0	1	1	0	1	1	0	1	1	1	0	0	1	1
S40	1	1	1	1	0	0	1	0	1	1	1	0	0	1	0	0	0	1	1	0	0	1	0	0	1	0	1	1	0	0	0	0	1	0	0	0	1	1	0	1	1	0	1	1	0	0	0	1	1
S40	1	1	1	1	0	0	1	0	1	1	1	0	0	1	0	0	0	1	1	0	0	1	0	0	1	0	1	1	0	0	0	1	1	0	0	0	1	1	0	1	0	0	1	1	1	0	0	1	1
S40	1	1	1	1	0	0	1	0	1	1	1	0	0	1	0	0	0	1	1	0	0	1	0	0	1	0	1	1	0	0	0	1	1	0	0	0	1	1	0	1	1	0	1	1	1	0	0	1	1
S40	1	1	1	1	0	0	1	0	1	1	1	0	0	1	0	0	0	1	1	0	0	1	0	0	1	0	1	1	0	0	0	1	1	0	0	0	1	1	0	1	1	0	1	1	1	0	0	1	1
S40	1	1	1	1	0	0	1	0	1	1	1	0	0	1	0	0	0	1	1	0	0	1	0	0	1	0	1	1	0	0	0	1	1	0	0	0	0	1	0	-	0	-	1	1	1	0	0	1	1
S40	1	1	1	1	0	0	1	0	1	1	1	0	0	1	0	0	0	1	1	0	0	1	0	0	1	0	1	1	0	0	0	1	1	0	0	0	0	1	0	-	0	-	1	1	1	0	0	1	1
S40	1	1	1	1	0	0	1	0	1	1	1	1	0	1	0	0	0	1	1	0	0	1	0	0	1	0	1	1	0	0	0	1	1	0	0	0	1	1	0	0	1	0	1	1	1	0	0	1	1
S40	1	1	0	1	0	0	1	0	1	1	1	0	0	1	0	0	0	1	1	0	0	1	0	0	0	0	1	1	0	0	0	1	1	0	0	0	1	1	0	0	1	0	1	1	1	0	0	1	0
S40	1	1	0	1	0	0	1	0	1	1	1	0	0	1	0	0	0	1	1	0	0	1	0	0	0	0	1	1	0	0	0	1	0	0	0	0	1	0	0	-	-	0	1	0	0	0	0	0	1
S40	1	1	0	1	0	0	1	0	1	1	1	0	0	1	0	0	0	1	1	0	0	1	0	0	0	0	1	1	0	0	0	1	0	0	0	0	1	0	0	-	-	0	1	0	0	0	0	0	1
S40	1	1	1	1	0	0	1	0	1	1	1	0	0	1	0	0	0	1	1	0	0	1	0	0	1	0	1	1	0	0	0	1	1	0	0	0	1	1	0	1	0	0	1	1	1	0	0	1	1
S40	1	1	1	1	0	0	1	0	1	1	1	0	0	1	0	0	0	1	1	0	0	1	0	0	1	0	1	1	0	0	0	1	1	0	0	0	1	1	0	0	0	0	1	0	1	0	0	1	1
S40	1	1	1	1	0	0	1	0	1	1	1	0	0	1	0	0	0	1	1	0	0	1	0	0	1	0	1	1	0	0	0	1	1	0	0	0	1	1	0	0	0	0	1	0	1	0	0	1	1
S40	1	1	1	1	0	0	1	0	1	1	1	0	0	1	0	0	0	1	1	0	0	1	0	0	1	0	1	1	0	0	0	1	1	0	0	0	1	1	0	0	0	0	1	0	1	0	0	1	1
S40	1	1	0	1	0	0	1	0	1	1	1	0	0	1	0	0	0	-	1	0	0	1	0	0	1	0	1	0	0	0	0	-	1	0	0	0	1	1	0	-	0	0	0	1	1	0	-	1	1
S40	1	1	0	1	0	0	1	0	1	1	1	0	0	1	0	0	0	1	1	0	0	1	0	0	1	0	1	0	0	0	0	-	1	0	0	0	1	1	0	-	0	0	0	1	1	0	-	1	1
S40	1	1	0	1	0	0	1	0	1	1	1	0	0	1	0	0	0	1	1	0	0	1	0	0	1	0	1	0	0	0	0	-	1	0	0	0	1	1	0	-	0	0	0	1	1	0	-	1	1
S40	1	1	0	1	0	0	1	0	1	1	1	0	0	1	0	0	0	1	1	0	0	1	0	0	1	0	1	0	0	0	0	-	0	0	0	0	1	1	0	-	0	0	0	1	0	0	-	0	1
S40	1	1	1	1	0	0	1	0	1	1	1	0	0	1	0	0	0	1	1	0	0	1	0	0	1	0	1	1	0	0	0	0	1	0	0	0	1	1	0	0	1	0	1	1	1	0	0	1	1
S40	1	1	1	1	0	0	1	0	1	1	1	0	0	1	0	0	0	1	1	0	0	1	0	0	1	0	1	1	0	0	0	0	1	0	0	0	1	1	0	0	1	0	1	1	1	0	0	1	1
S40 Average	1	1	0.730769	1	0	0	1	0	0.961538	0.961538	1	0.0384615	0	1	0	0	0	1	1	0	0	1	0	0	0.884615	0	1	0.846154	0	0	0	0.681818	0.884615	0	0	0	0.923077	0.923077	0	0.411765	0.391304	0	0.846154	0.807692	0.846154	0	0	0.884615	0.923077
S42	0	1	0	0	0	0	1	1	1	1	0	0	0	1	0	0	0	1	1	0	0	0	1	0	0	0	0	0	1	1	0	0	0	0	1	1	1	0	1	0	0	0	1	0	1	1	1	0	1
S42	0	1	0	0	0	0	1	1	1	1	0	0	0	1	0	0	0	1	1	0	0	0	0	0	0	0	0	0	1	1	0	0	0	0	1	1	0	0	1	1	0	0	1	0	1	1	0	0	1
S42	0	1	0	0	0	0	1	0	1	1	0	0	0	1	0	0	0	0	1	0	0	0	1	0	0	0	0	0	1	-	0	-	0	0	1	1	0	0	1	1	-	0	1	0	1	1	1	0	1
S42	0	1	0	0	0	0	1	0	1	1	0	0	0	1	0	0	0	0	1	0	0	0	1	0	0	0	0	0	1	-	0	-	0	0	1	1	0	0	1	1	-	0	1	0	1	1	1	0	1
S42	0	1	0	0	0	0	1	0	1	1	0	0	0	1	0	0	0	1	1	0	0	0	1	0	0	0	0	0	1	1	0	0	0	0	1	1	1	0	1	0	-	0	0	0	1	1	-	0	1
S42	0	1	0	0	0	0	1	0	1	1	0	0	0	1	0	0	0	1	1	0	0	0	1	0	0	0	0	0	1	1	0	0	0	0	1	1	1	0	1	0	-	0	0	0	1	1	-	0	1
S42	0	1	0	0	0	0	1	1	1	1	0	0	0	1	0	0	0	1	1	0	0	0	1	0	0	0	0	0	1	1	0	0	0	0	1	1	1	0	1	1	0	0	1	0	1	1	1	0	1
S42	0	1	0	0	0	0	0	1	1	1	0	0	0	1	0	0	0	0	1	0	0	0	1	0	0	0	0	0	1	1	0	0	0	0	1	1	1	0	1	0	0	0	1	0	1	1	1	0	1
S42	0	1	0	0	0	0	1	0	1	1	0	0	0	1	0	0	0	1	1	0	0	0	1	0	0	0	0	0	1	1	0	0	0	0	1	1	1	0	1	1	0	0	1	0	1	1	1	0	1
S42	1	1	0	1	0	0	0	0	1	1	1	0	0	1	0	0	0	0	0	0	0	1	0	0	1	0	1	1	1	0	0	0	1	0	0	0	1	1	0	1	1	0	1	1	1	0	0	0	1
S42	1	1	0	1	0	0	1	-	1	0	1	-	0	1	0	0	0	1	1	0	0	1	0	0	1	0	1	1	1	0	0	0	0	0	0	0	1	1	0	-	0	0	1	1	1	-	-	0	0
S42	1	1	0	1	0	0	1	0	1	1	1	0	0	1	0	0	0	1	1	0	0	1	0	0	1	0	1	1	1	0	0	1	1	0	0	0	1	1	0	1	1	0	1	1	1	0	0	0	1
S42	1	1	0	1	0	0	1	0	1	1	1	0	0	1	0	0	0	1	1	0	0	1	0	0	1	0	1	1	1	0	0	1	1	0	0	0	1	1	0	1	1	0	1	1	1	0	0	0	1
S42	0	1	0	1	0	0	1	0	1	1	1	0	0	0	0	0	0	1	1	0	0	1	0	0	1	0	1	1	1	0	0	-	1	0	0	0	1	1	0	0	0	0	1	1	1	0	0	0	1
S42	0	1	0	1	0	0	1	0	1	1	1	0	0	0	0	0	0	1	1	0	0	1	0	0	1	0	1	1	1	0	0	-	1	0	0	0	1	1	0	0	0	0	1	1	1	0	0	0	1
S42	1	1	0	1	0	-	0	0	1	1	1	0	0	1	-	0	0	-	1	0	0	1	0	0	1	0	1	1	1	0	0	1	1	0	0	0	1	1	0	1	0	0	1	1	0	0	0	0	1
S42	1	1	0	1	0	0	1	0	1	1	1	0	0	1	0	0	0	1	1	0	0	0	0	0	0	0	1	1	1	0	0	1	1	0	0	0	0	1	0	1	0	0	1	1	1	0	0	0	1
S42	1	1	0	1	0	0	1	0	1	1	1	0	0	1	0	0	0	1	1	0	0	1	0	0	1	0	0	1	1	0	0	0	1	0	0	0	1	1	0	0	0	0	1	1	1	0	0	0	1
S42	1	1	0	1	0	0	1	0	1	1	1	0	0	1	0	0	0	1	1	0	0	1	0	0	1	0	0	1	1	0	0	0	1	0	0	0	1	1	0	0	0	0	1	1	1	0	0	0	1
S42	1	1	0	1	0	0	1	0	1	1	1	0	0	1	0	0	0	1	1	0	0	1	0	0	1	0	1	1	1	0	0	1	1	0	0	0	1	1	0	1	1	0	1	1	1	0	0	0	1
S42 Average	0.45	1	0	0.55	0	0	0.85	0.210526	1	0.95	0.55	0	0	0.9	0	0	0	0.789474	0.95	0	0	0.5	0.4	0	0.5	0	0.45	0.55	1	0.388889	0	0.3125	0.5	0	0.45	0.45	0.8	0.55	0.45	0.578947	0.25	0	0.9	0.55	0.95	0.473684	0.352941	0	0.95
S43	0	0	0	1	1	1	0	0	0	0	0	0	1	1	1	0	0	0	0	0	0	1	1	1	1	0	0	0	1	0	1	1	0	0	1	1	0	1	1	1	0	1	1	0	0	0	1	0	1
S43	1	0	0	1	1	0	0	0	1	1	1	1	0	1	1	0	1	1	0	1	1	0	0	1	1	0	1	1	1	1	1	1	1	0	1	0	1	0	0	0	1	1	0	1	0	0	1	0	0
S43	0	0	0	1	1	1	0	0	0	0	0	0	1	1	1	0	0	0	0	0	0	1	1	1	1	0	0	0	1	0	1	1	0	0	1	1	0	1	1	1	0	0	1	0	0	0	1	1	1
S43	0	0	0	1	1	1	0	0	0	0	0	0	1	1	1	0	0	0	0	0	0	1	1	1	1	0	0	0	1	0	1	1	0	0	1	1	0	1	1	1	0	0	1	0	0	0	1	1	1
S43	0	0	0	1	1	1	0	0	0	0	0	0	1	1	1	0	0	0	0	0	0	1	1	1	1	0	0	0	1	0	1	1	0	0	1	1	0	1	1	1	0	0	1	0	0	0	1	1	1
S43	0	0	0	1	1	1	0	0	0	0	0	0	1	1	1	0	0	0	0	0	0	1	1	1	1	0	0	0	1	0	1	1	0	0	1	1	0	1	1	0	0	1	1	0	0	0	0	1	1
S43	0	0	0	1	1	1	0	0	0	0	0	0	1	1	1	0	0	0	0	0	0	1	1	1	1	0	0	0	1	0	1	1	0	0	1	1	0	1	1	0	0	1	1	0	0	0	0	1	1
S43	0	0	0	1	1	1	0	0	0	0	0	0	1	1	1	0	0	0	0	0	0	1	1	1	1	0	0	0	1	0	1	1	0	0	1	1	0	1	1	0	0	1	1	0	0	0	0	1	1
S43	1	0	0	0	1	0	0	0	0	0	1	1	0	0	1	0	0	1	0	0	1	0	0	1	0	1	1	1	0	0	0	1	0	0	0	0	0	0	1	1	0	1	1	0	1	0	0	1	0
S43 Average	0.222222	0	0	0.888889	1	0.777778	0	0	0.111111	0.111111	0.222222	0.222222	0.777778	0.888889	1	0	0.111111	0.222222	0	0.111111	0.222222	0.777778	0.777778	1	0.888889	0.111111	0.222222	0.222222	0.888889	0.111111	0.888889	1	0.111111	0	0.888889	0.777778	0.111111	0.777778	0.888889	0.555556	0.111111	0.666667	0.888889	0.111111	0.111111	0	0.555556	0.777778	0.777778
S44	1	0	1	0	1	-	0	1	1	0	0	0	1	1	0	0	0	0	0	0	1	1	1	0	1	0	0	0	0	1	0	0	0	1	0	0	0	1	-	0	-	0	1	0	1	-	0	1	1
S44	1	0	1	0	1	-	0	1	1	0	0	0	1	1	0	0	0	0	0	0	1	1	1	0	1	0	0	0	0	1	0	0	0	1	0	0	0	1	-	0	-	0	1	0	1	-	0	1	1
S44	1	0	1	0	1	0	0	1	1	1	0	0	1	0	0	0	0	0	0	0	1	1	1	0	1	0	0	0	1	1	0	0	0	0	0	0	0	1	1	1	0	0	1	0	1	0	0	0	1
S44	1	0	1	0	1	0	0	1	1	1	0	0	1	0	0	0	0	0	0	0	1	1	1	0	1	0	0	0	1	1	0	0	0	0	0	0	0	1	1	1	0	0	1	0	1	0	0	0	1
S44	1	0	1	0	1	0	0	1	1	1	0	0	1	0	0	0	0	0	0	0	1	1	1	0	1	0	0	0	1	1	0	0	0	0	0	0	0	1	1	1	0	0	1	0	1	0	0	0	1
S44	1	0	0	0	0	-	0	0	1	1	0	0	1	1	0	0	0	0	0	0	1	1	1	0	1	0	0	0	1	1	0	-	0	0	0	0	0	1	1	0	0	0	1	0	1	0	1	1	1
S44	1	0	0	0	0	-	0	0	1	1	0	0	1	1	0	0	0	0	0	0	1	1	1	0	1	0	0	0	1	1	0	-	0	0	0	0	0	1	1	0	0	0	1	0	1	0	1	1	1
S44	1	1	1	1	0	-	1	0	0	0	1	0	1	0	-	0	0	0	1	0	1	1	0	-	0	1	1	1	1	1	0	1	1	1	1	1	0	1	1	0	-	0	1	0	0	1	1	1	0
S44	1	1	1	1	0	-	1	0	0	0	1	0	1	0	-	0	0	0	1	0	1	1	0	-	0	1	1	1	1	1	0	1	1	1	1	1	0	1	1	0	-	0	1	0	0	1	1	1	0
S44	1	1	1	1	0	-	1	0	0	0	1	0	1	0	-	0	0	0	1	0	1	1	0	-	0	1	1	1	1	1	0	1	1	1	1	1	0	1	1	0	-	0	1	0	0	1	1	1	0
S44	1	-	1	1	0	-	0	1	-	1	1	0	1	0	-	1	1	0	1	0	1	1	0	1	0	1	1	1	1	0	0	1	1	1	1	0	0	1	1	1	0	0	1	1	1	0	0	1	1
S44 Average	1	0.3	0.818182	0.363636	0.454545	0	0.272727	0.545455	0.7	0.545455	0.363636	0	1	0.363636	0	0.0909091	0.0909091	0	0.363636	0	1	1	0.636364	0.125	0.636364	0.363636	0.363636	0.363636	0.818182	0.909091	0	0.444444	0.363636	0.545455	0.363636	0.272727	0	1	1	0.363636	0	0	1	0.0909091	0.727273	0.333333	0.454545	0.727273	0.727273
S45	1	0	1	1	0	0	1	0	1	0	1	0	0	1	0	0	0	0	1	0	0	1	0	0	0	0	1	1	0	0	0	-	1	0	0	0	0	1	0	0	1	0	1	1	1	0	0	1	0
S45	1	0	1	1	0	0	1	0	1	0	1	0	0	1	0	0	0	0	1	0	0	1	0	0	0	0	1	1	0	0	0	-	1	0	0	0	0	1	0	0	1	0	1	1	1	0	0	1	0
S45	1	1	0	1	0	0	1	0	1	1	1	0	0	0	0	0	0	1	1	0	0	1	0	0	1	0	1	1	0	0	0	0	0	0	0	0	0	1	0	0	0	0	1	1	1	0	-	0	1
S45	1	1	1	1	0	1	1	0	1	1	1	0	0	1	0	0	0	1	1	0	0	1	0	0	1	0	1	1	0	0	0	1	0	0	0	0	1	1	0	0	0	0	1	1	0	0	0	0	1
S45	1	1	1	1	0	1	1	0	1	1	1	0	0	1	0	0	0	1	1	0	0	1	0	0	1	0	1	1	0	0	0	1	0	0	0	0	1	1	0	0	0	0	1	1	0	0	0	0	1
S45	1	1	1	0	0	0	0	0	1	1	1	0	0	1	-	0	0	-	1	0	0	1	0	0	1	0	1	1	0	0	0	0	1	-	0	0	-	1	0	0	0	0	1	1	1	0	-	1	1
S45	1	1	1	0	0	0	0	0	1	1	1	0	0	1	-	0	0	-	1	0	0	1	0	0	1	0	1	1	0	0	0	0	1	-	0	0	-	1	0	0	0	0	1	1	1	0	-	1	1
S45	1	1	1	0	0	0	0	0	1	1	1	0	0	1	-	0	0	-	1	0	0	1	0	0	1	0	1	1	0	0	0	0	1	-	0	0	-	1	0	0	0	0	1	1	1	0	-	1	1
S45	1	1	1	1	0	0	1	0	1	1	1	0	0	1	0	0	0	1	1	0	0	1	0	0	1	0	1	1	0	0	0	1	1	0	0	0	1	1	0	0	1	0	1	1	1	0	0	0	1
S45	0	0	0	1	0	0	0	0	0	0	1	0	0	0	0	0	1	1	1	1	0	0	0	1	0	1	1	0	1	0	1	0	0	1	1	1	0	0	1	0	0	1	1	1	0	0	1	1	0
S45	1	1	1	1	0	0	1	0	1	1	1	0	0	1	0	0	0	1	1	0	0	1	0	0	1	0	1	1	0	0	0	1	1	0	0	0	1	1	0	0	0	0	1	1	1	0	0	1	1
S45	1	1	1	1	0	1	1	0	1	1	1	0	0	1	0	0	0	1	1	0	0	1	0	0	1	0	1	1	0	0	0	1	1	0	0	0	1	1	0	1	1	0	1	1	1	0	0	1	1
S45 Average	0.916667	0.75	0.833333	0.75	0	0.25	0.666667	0	0.916667	0.75	1	0	0	0.833333	0	0	0.0833333	0.777778	1	0.0833333	0	0.916667	0	0.0833333	0.75	0.0833333	1	0.916667	0.0833333	0	0.0833333	0.5	0.666667	0.111111	0.0833333	0.0833333	0.555556	0.916667	0.0833333	0.0833333	0.333333	0.0833333	1	1	0.75	0	0.125	0.666667	0.75
S46	1	1	0	1	0	0	1	0	0	1	1	1	0	0	0	0	1	1	1	0	0	1	0	0	1	1	1	1	0	0	1	0	0	0	0	0	1	1	0	1	0	0	1	0	1	0	0	1	1
S46	1	1	1	1	0	-	1	0	1	1	1	0	0	0	-	0	0	-	0	0	0	1	0	0	1	0	1	1	0	0	1	0	0	0	0	0	0	1	0	0	0	-	1	1	1	0	0	0	1
S46	1	1	1	1	0	1	1	0	1	1	1	1	0	0	0	0	1	1	1	0	0	1	0	0	1	1	1	1	0	0	1	0	0	0	0	0	1	1	0	-	0	0	1	1	1	0	0	1	1
S46	1	1	1	1	0	1	1	0	1	1	1	1	0	0	0	0	1	1	1	0	0	1	0	0	1	1	1	1	0	0	1	0	0	0	0	0	1	1	0	-	0	0	1	1	1	0	0	1	1
S46	1	1	1	1	0	1	1	0	1	1	1	1	0	0	0	0	1	1	1	0	0	1	0	0	1	1	1	1	0	0	1	0	0	0	0	0	1	1	0	-	0	0	1	1	1	0	0	1	1
S46 Average	1	1	0.8	1	0	0.75	1	0	0.8	1	1	0.8	0	0	0	0	0.8	1	0.8	0	0	1	0	0	1	0.8	1	1	0	0	1	0	0	0	0	0	0.8	1	0	0.5	0	0	1	0.8	1	0	0	0.8	1
S47	0	1	0	0	1	1	1	1	1	1	1	1	1	0	0	1	1	1	1	0	1	0	0	1	1	0	1	1	1	0	0	1	1	0	0	0	1	0	0	1	0	1	1	1	1	1	1	1	1
S47	0	1	0	0	1	1	1	1	1	1	1	1	1	0	0	1	1	1	1	0	1	0	0	1	1	0	1	1	1	0	0	1	1	0	0	0	1	0	0	1	0	1	1	1	1	1	1	1	1
S47	0	1	0	0	1	1	1	1	1	1	1	1	1	0	0	1	1	1	1	0	1	0	0	1	1	0	1	1	1	0	0	1	1	0	0	0	1	0	0	1	0	1	1	1	1	1	1	1	1
S47	0	1	0	0	1	1	1	1	1	1	1	1	1	0	0	1	1	0	1	0	1	0	0	1	1	0	1	1	1	0	0	1	1	0	0	0	1	0	0	0	0	1	1	1	1	1	1	1	1
S47	0	1	0	0	1	1	1	1	1	1	1	1	1	0	0	1	1	1	1	0	1	0	0	1	1	0	1	1	1	0	0	0	1	0	0	0	0	0	0	1	0	1	1	1	1	1	0	1	1
S47	0	1	0	0	1	1	1	1	1	1	1	1	1	0	0	1	1	1	1	0	1	0	0	1	1	0	1	1	1	0	0	1	1	0	0	0	1	0	0	1	0	1	1	1	1	1	1	1	1
S47	0	1	0	0	1	1	1	1	1	1	1	1	1	0	0	1	1	1	1	0	1	0	0	1	0	0	1	1	1	0	0	1	1	0	0	0	1	0	0	0	0	1	1	1	1	1	0	0	1
S47	0	1	0	0	1	0	1	1	1	1	1	1	1	0	0	1	0	1	1	0	1	0	-	1	0	0	1	1	1	0	0	1	1	0	0	0	1	0	0	-	-	0	1	1	0	0	-	0	0
S47	0	1	0	0	1	0	1	1	1	1	1	1	1	0	0	1	0	1	1	0	1	0	-	1	0	0	1	1	1	0	0	1	1	0	0	0	1	0	0	-	-	0	1	1	0	0	-	0	0
S47	0	1	0	0	1	1	1	1	1	1	1	1	1	0	0	1	1	1	1	0	1	0	0	1	1	0	1	1	1	0	0	1	1	0	0	0	1	0	0	1	0	1	1	1	1	1	1	1	1
S47	0	1	0	0	1	1	1	1	1	1	1	1	1	0	0	1	1	1	1	0	1	0	0	1	1	0	1	1	1	0	0	1	1	0	0	0	1	0	0	1	0	1	1	1	1	1	1	1	1
S47	0	1	0	0	1	0	0	1	1	1	1	0	0	0	0	1	1	0	1	0	1	0	0	1	0	0	1	1	0	0	0	0	1	0	0	0	0	0	0	-	-	1	1	1	1	0	0	1	1
S47	0	1	0	0	1	1	1	1	1	1	1	1	1	0	0	1	1	1	1	0	1	0	0	1	1	0	1	1	1	0	0	1	1	0	0	0	1	0	0	1	0	1	1	1	1	1	1	1	1
S47	0	1	0	0	1	1	1	1	1	1	1	1	1	0	0	1	1	1	1	0	1	0	0	1	1	0	1	1	1	0	0	1	1	0	0	0	1	0	0	1	0	1	1	1	1	1	1	1	1
S47	0	1	0	0	1	1	1	1	1	1	1	1	1	0	0	1	1	1	1	0	1	0	0	1	1	0	1	1	1	0	0	1	1	0	0	0	1	0	0	1	0	1	1	1	1	1	1	1	1
S47 Average	0	1	0	0	1	0.8	0.933333	1	1	1	1	0.933333	0.933333	0	0	1	0.866667	0.866667	1	0	1	0	0	1	0.733333	0	1	1	0.933333	0	0	0.866667	1	0	0	0	0.866667	0	0	0.833333	0	0.866667	1	1	0.866667	0.8	0.769231	0.8	0.866667
S49	0	0	0	1	1	1	0	0	0	0	0	0	1	1	1	0	0	0	0	0	0	1	1	1	1	0	0	0	1	0	1	1	0	-	1	1	0	1	1	-	0	1	1	0	0	0	1	1	1
S49	0	0	0	1	0	-	0	0	0	0	0	0	1	1	1	0	0	0	0	0	0	1	1	1	1	0	0	0	1	0	1	0	0	0	1	1	0	1	1	-	0	1	1	0	0	0	-	0	1
S49	0	0	0	1	0	-	0	0	0	0	0	0	1	1	1	0	0	0	0	0	0	1	1	1	1	0	0	0	1	0	1	0	0	0	1	1	0	1	1	-	0	1	1	0	0	0	-	0	1
S49	0	0	0	1	0	-	0	0	0	0	0	0	1	1	1	0	0	0	0	0	0	1	1	1	1	0	0	0	1	0	1	0	0	0	1	1	0	1	1	-	0	1	1	0	0	0	-	0	1
S49	0	0	0	1	1	1	0	0	0	0	0	0	1	1	1	0	0	0	0	0	0	1	1	1	1	0	0	0	1	0	1	1	0	0	1	1	0	1	0	0	0	0	1	0	0	0	0	0	1
S49	0	0	0	1	1	1	0	0	0	0	0	0	1	1	1	0	0	0	0	0	0	1	1	1	1	0	0	0	1	0	1	1	0	0	1	1	0	1	0	0	0	0	1	0	0	0	0	0	1
S49	0	0	0	1	0	1	0	0	0	0	0	0	1	1	1	0	0	0	0	0	0	1	1	1	1	0	0	0	1	0	1	0	0	0	1	1	0	1	1	-	-	1	1	0	0	0	0	1	0
S49	0	0	0	1	1	0	0	0	0	0	0	1	1	1	0	0	0	0	0	0	0	1	1	0	1	0	0	0	1	0	1	1	0	0	1	1	0	1	1	1	0	0	1	0	0	0	0	0	1
S49	0	0	0	1	1	0	0	0	0	0	0	1	1	1	0	0	0	0	0	0	0	1	1	0	1	0	0	0	1	0	1	1	0	0	1	1	0	1	1	1	0	0	1	0	0	0	0	0	1
S49	0	0	0	1	1	0	0	0	0	0	0	1	1	1	0	0	0	0	0	0	0	1	1	0	1	0	0	0	1	0	1	1	0	0	1	1	0	1	1	1	0	0	1	0	0	0	0	0	1
S49	0	0	0	1	1	1	0	0	0	0	0	1	1	1	1	0	0	0	0	0	0	1	1	1	1	0	0	0	1	0	1	-	0	0	1	1	0	1	1	0	0	1	1	1	0	0	1	1	0
S49	0	0	0	1	1	1	0	0	0	0	0	0	1	1	1	0	0	0	0	0	0	1	1	1	1	0	0	0	1	0	1	1	0	0	1	1	0	1	1	1	0	1	1	0	0	0	1	1	1
S49	0	0	0	1	1	1	0	0	0	0	0	0	1	1	1	0	0	0	0	0	0	1	1	1	1	0	0	0	1	0	1	1	0	0	1	1	0	1	1	1	0	1	1	0	0	0	1	1	1
S49	0	0	0	1	1	1	0	0	0	0	0	1	1	1	1	0	0	0	0	0	0	1	1	1	1	0	0	0	1	0	1	1	0	0	1	1	0	1	1	1	0	1	1	0	0	0	1	1	1
S49	0	0	0	1	1	1	0	0	0	0	0	1	1	1	1	0	0	0	0	0	0	1	1	1	1	0	0	0	1	0	1	1	0	0	1	1	0	1	1	1	0	1	1	0	0	0	1	1	1
S49	0	0	0	1	1	1	0	0	0	0	0	0	1	1	1	0	0	0	0	0	0	1	1	1	0	0	0	0	1	0	1	1	0	0	1	1	0	1	1	0	0	1	1	0	0	0	0	1	1
S49	0	0	0	1	1	1	0	0	0	0	0	0	1	1	1	0	0	0	0	0	0	1	1	1	0	0	0	0	1	0	1	1	0	0	1	1	0	1	1	0	0	1	1	0	0	0	0	1	1
S49	0	0	0	1	1	0	0	0	0	0	0	0	1	0	1	0	0	0	0	0	0	1	1	1	1	0	0	0	1	0	1	1	0	0	1	0	0	1	1	0	0	-	1	0	0	0	0	1	0
S49	0	0	0	1	1	0	0	0	0	0	0	0	1	1	1	0	0	0	0	0	0	1	1	1	1	0	0	0	1	0	1	0	0	0	1	1	0	0	1	1	0	0	1	0	0	0	0	1	1
S49	0	0	0	1	1	1	0	0	0	0	0	0	1	1	1	0	0	0	0	0	0	1	1	1	1	0	0	0	1	0	1	1	0	0	1	1	0	1	1	1	0	0	1	0	0	0	1	1	1
S49	0	0	0	1	1	1	0	0	0	0	0	0	1	1	1	0	0	0	0	0	0	1	1	1	1	0	0	0	1	0	1	1	0	0	1	1	0	1	1	1	0	0	1	0	0	0	1	1	1
S49	0	0	0	1	1	1	0	0	0	0	0	0	1	1	0	0	0	0	0	0	0	1	0	1	1	0	0	0	1	0	1	1	0	0	1	1	0	1	1	1	-	1	1	0	0	0	0	0	1
S49	0	0	0	1	1	0	0	0	0	0	0	0	1	1	-	0	0	0	0	0	0	1	1	1	0	0	0	0	1	0	1	-	0	0	1	1	0	1	1	-	0	1	1	0	0	0	1	1	1
S49	0	0	0	1	1	1	0	0	0	0	0	0	1	1	0	0	0	0	0	0	0	1	1	1	1	0	0	0	1	0	0	0	0	0	1	1	0	1	1	-	0	1	1	0	0	0	1	1	1
S49	0	0	0	1	1	1	0	0	0	0	0	0	1	1	0	0	0	0	0	0	0	1	1	1	1	0	0	0	1	0	0	0	0	0	1	1	0	1	1	-	0	1	1	0	0	0	1	1	1
S49 Average	0	0	0	1	0.84	0.727273	0	0	0	0	0	0.24	1	0.96	0.75	0	0	0	0	0	0	1	0.96	0.88	0.88	0	0	0	1	0	0.92	0.695652	0	0	1	0.96	0	0.96	0.92	0.647059	0	0.666667	1	0.04	0	0	0.5	0.64	0.88
S50	0	0	1	1	0	1	1	0	0	1	1	1	1	1	1	1	1	0	0	1	1	1	0	0	0	1	0	0	1	1	0	0	0	1	0	0	-	1	0	-	0	0	0	0	0	0	0	0	1
S50	0	0	1	1	0	1	1	0	0	1	1	0	1	1	1	1	1	0	0	1	1	1	0	0	1	1	0	0	1	1	0	0	0	0	0	0	0	0	0	1	0	0	0	0	0	0	0	0	1
S50	0	0	1	1	0	1	1	0	0	1	1	0	1	1	1	1	1	0	0	1	1	1	0	0	1	1	0	0	1	1	0	0	0	0	0	0	0	1	0	1	0	0	0	0	0	0	0	0	1
S50	0	0	1	1	0	1	1	0	0	1	1	1	1	1	1	1	1	0	0	1	1	1	0	0	1	1	0	0	1	1	0	0	0	1	0	0	0	1	0	1	0	0	0	0	0	0	0	0	1
S50	0	0	1	1	0	1	1	0	0	1	1	1	1	1	1	1	1	0	0	1	1	1	0	0	1	1	0	0	1	1	0	0	0	1	0	0	0	1	0	1	0	0	0	0	0	0	0	0	1
S50	0	0	1	1	0	1	1	0	0	1	1	1	1	1	1	1	1	0	0	1	1	1	0	0	1	1	0	0	1	1	0	0	0	1	0	0	0	1	0	1	0	0	0	0	0	0	0	0	1
S50	0	0	1	1	0	1	1	0	0	1	1	1	1	1	1	1	1	0	0	1	1	1	0	0	1	1	0	0	1	1	0	1	0	1	0	0	0	1	0	1	0	0	0	0	0	0	0	0	1
S50	0	0	-	1	0	0	1	0	0	1	1	-	1	1	1	1	1	0	0	1	1	1	0	0	1	1	0	0	1	0	0	0	0	0	0	0	0	1	0	0	-	0	0	0	0	0	0	0	1
S50	0	0	1	1	0	1	1	0	0	1	1	1	1	1	1	1	1	0	0	1	1	1	0	0	1	1	0	0	1	1	0	1	0	1	0	0	0	1	0	-	-	0	0	0	0	0	0	0	1
S50	0	0	1	1	0	1	1	0	0	1	1	1	1	1	1	1	1	0	0	1	1	1	0	0	1	1	0	0	1	1	0	1	0	1	0	0	0	1	0	1	0	0	0	0	0	0	0	0	1
S50	0	0	1	1	0	0	1	0	0	1	1	1	1	0	1	1	-	0	0	1	1	1	-	0	1	1	0	0	1	0	0	-	0	1	0	0	0	1	0	-	0	0	0	0	0	0	0	0	0
S50	0	0	1	1	0	0	1	0	0	1	1	1	1	0	1	1	-	0	0	1	1	1	-	0	1	1	0	0	1	0	0	-	0	1	0	0	0	1	0	-	0	0	0	0	0	0	0	0	0
S50 Average	0	0	1	1	0	0.75	1	0	0	1	1	0.818182	1	0.833333	1	1	1	0	0	1	1	1	0	0	0.916667	1	0	0	1	0.75	0	0.3	0	0.75	0	0	0	0.916667	0	0.875	0	0	0	0	0	0	0	0	0.833333
S51	0	1	0	0	0	0	0	0	1	1	0	1	0	1	1	0	1	1	1	0	1	0	0	0	0	1	0	0	0	0	0	0	1	1	0	0	1	1	0	0	0	1	0	0	1	0	-	0	1
S51	0	1	0	0	0	0	0	0	1	1	0	1	0	1	1	0	1	1	1	0	1	0	0	0	0	1	0	0	0	0	0	1	1	1	0	0	1	1	0	0	0	1	0	0	1	0	1	0	1
S51	0	1	0	0	0	0	0	0	1	1	0	1	0	1	1	0	1	1	1	0	1	0	0	0	0	1	0	0	0	0	0	1	1	1	0	0	1	1	0	0	0	1	0	0	1	0	1	0	1
S51	0	1	0	0	0	0	0	0	1	1	0	1	0	1	1	0	1	1	1	0	1	0	0	0	0	1	0	0	0	0	0	1	1	1	0	0	1	1	0	0	0	1	0	0	1	0	1	0	1
S51 Average	0	1	0	0	0	0	0	0	1	1	0	1	0	1	1	0	1	1	1	0	1	0	0	0	0	1	0	0	0	0	0	0.75	1	1	0	0	1	1	0	0	0	1	0	0	1	0	1	0	1
S52	0	1	0	0	0	1	0	0	0	0	1	1	0	0	0	0	1	1	1	0	1	0	0	0	0	0	0	0	0	1	0	1	0	1	0	0	0	1	0	0	0	1	0	0	0	0	1	0	1
S52	0	1	0	0	0	1	0	0	0	0	1	1	0	0	0	0	1	1	1	0	1	0	0	0	0	0	0	0	0	1	0	1	1	1	0	0	0	1	0	0	0	1	0	0	1	0	0	0	1
S52	0	1	0	0	0	1	0	0	0	0	1	1	0	0	0	0	1	1	1	0	1	0	0	0	0	0	0	0	0	1	0	1	1	1	0	0	0	1	0	0	0	1	0	0	1	0	0	0	1
S52 Average	0	1	0	0	0	1	0	0	0	0	1	1	0	0	0	0	1	1	1	0	1	0	0	0	0	0	0	0	0	1	0	1	0.666667	1	0	0	0	1	0	0	0	1	0	0	0.666667	0	0.333333	0	1
S53	0	0	1	1	0	1	0	0	0	0	1	1	0	1	1	1	1	0	0	0	0	1	0	0	0	1	1	1	0	-	1	1	-	0	0	0	0	0	0	-	0	1	0	0	-	-	1	0	0
S53	0	0	0	1	0	1	0	0	0	-	1	1	0	1	0	1	1	0	0	0	0	1	0	0	0	1	1	1	0	1	1	1	1	0	0	0	0	0	0	-	0	1	0	0	1	1	1	0	0
S53	0	0	0	1	0	1	0	0	0	-	1	1	0	1	0	1	1	0	0	0	0	1	0	0	0	1	1	1	0	1	1	1	1	0	0	0	0	0	0	-	0	1	0	0	1	1	1	0	0
S53	0	0	0	1	0	1	0	0	0	-	1	1	0	1	0	1	1	0	0	0	0	1	0	0	0	1	1	1	0	1	1	1	1	0	0	0	0	0	0	-	0	1	0	0	1	1	1	0	0
S53	0	0	1	1	0	1	0	0	0	0	1	1	0	0	1	1	0	0	0	0	0	1	0	0	0	1	1	1	0	1	1	1	1	0	0	0	0	0	0	-	0	1	0	0	1	1	0	0	0
S53	0	0	1	1	0	1	0	0	0	0	1	1	0	0	1	1	0	0	0	0	0	1	0	0	0	1	1	1	0	1	1	1	1	0	0	0	0	0	0	-	0	1	0	0	1	1	0	0	0
S53	0	0	1	1	0	1	0	0	0	0	1	1	0	1	1	1	1	0	0	0	0	1	0	0	0	1	1	1	0	1	1	1	1	0	0	0	0	0	0	1	0	1	0	0	1	1	1	0	0
S53	0	0	1	1	0	1	0	0	0	0	1	1	0	1	1	1	1	0	0	0	0	1	0	0	0	1	1	1	0	0	1	1	0	0	0	0	0	0	0	0	0	1	0	0	0	0	1	0	0
S53	0	0	1	1	0	1	0	0	0	0	1	1	0	1	1	1	1	0	0	0	0	1	0	0	0	1	1	1	0	1	1	1	1	0	0	0	0	0	0	1	0	1	0	0	1	1	1	0	0
S53	0	0	1	1	0	1	0	0	0	0	1	1	0	1	1	1	1	0	0	0	0	1	0	0	0	1	1	1	0	0	1	0	0	0	0	0	0	0	0	0	0	1	0	0	0	0	-	0	0
S53	0	0	1	1	0	1	0	0	0	0	1	1	0	1	1	1	1	0	0	0	0	1	0	0	0	1	1	1	0	0	1	1	0	0	0	0	0	0	0	0	-	1	0	0	0	0	0	0	0
S53	0	0	1	1	0	1	0	0	0	0	1	1	0	1	1	1	1	0	0	0	0	1	0	0	0	1	1	1	0	1	1	1	1	0	0	0	0	0	0	0	-	1	0	0	1	1	0	0	0
S53	0	0	1	1	0	1	0	0	0	0	1	1	0	1	1	1	1	0	0	0	0	1	0	0	0	1	1	1	0	1	1	1	1	0	0	0	0	0	0	0	-	1	0	0	1	1	0	0	0
S53	0	0	1	1	0	1	0	0	0	0	1	1	0	1	1	1	1	0	0	0	0	1	0	0	0	1	1	1	0	1	1	1	1	0	0	0	0	0	0	0	-	1	0	0	1	1	0	0	0
S53	0	0	1	1	0	1	0	0	0	0	1	1	0	1	0	1	1	0	0	0	0	1	0	0	0	1	1	1	0	1	1	0	1	-	0	0	0	0	0	0	0	1	0	0	1	1	1	0	0
S53	0	0	1	1	0	1	0	0	0	0	1	1	0	1	0	1	1	0	0	0	0	1	0	0	0	1	1	1	0	1	1	0	1	-	0	0	0	0	0	0	0	1	0	0	1	1	1	0	0
S53	0	0	1	1	0	1	0	0	0	0	1	1	0	1	0	1	1	0	0	0	0	1	0	0	0	1	1	1	0	0	1	0	0	-	0	0	0	0	0	0	0	1	0	0	0	0	1	0	0
S53	0	0	1	1	0	1	0	0	0	0	1	1	0	1	1	1	1	0	0	0	0	1	0	0	0	1	1	1	0	0	1	0	0	0	0	0	0	0	0	-	0	1	0	0	0	0	1	0	0
S53	1	1	0	0	1	0	1	0	1	1	1	1	0	0	0	1	0	0	0	0	1	0	0	0	1	1	1	1	1	1	1	1	1	0	0	0	0	1	0	1	0	0	0	1	0	0	1	0	1
S53	1	1	0	0	1	0	1	0	1	1	1	1	0	0	0	1	0	0	0	0	1	0	0	0	1	1	1	1	1	1	1	1	1	0	0	0	0	1	0	-	0	0	0	1	0	0	1	0	1
S53	1	1	0	0	1	0	1	0	1	1	1	1	0	0	0	1	0	0	0	0	1	0	0	0	1	1	1	1	1	0	1	1	1	0	0	0	0	1	0	1	0	0	0	1	0	0	1	0	1
S53	1	1	0	0	1	0	1	0	1	1	1	1	0	0	0	1	0	0	0	0	1	0	0	0	1	1	1	1	1	1	1	1	1	0	0	0	0	1	0	0	0	0	0	1	0	0	1	0	1
S53	1	1	0	0	1	0	1	0	1	1	1	1	0	0	0	1	0	0	0	0	1	0	0	0	1	1	1	1	1	1	1	1	1	0	0	0	0	1	0	0	0	0	0	1	0	0	1	0	1
S53	1	1	0	0	1	0	1	0	1	1	1	1	0	0	0	1	0	0	0	0	1	0	0	0	1	1	1	1	1	1	1	0	1	0	0	0	0	1	0	0	-	0	0	1	0	0	1	0	1
S53	1	1	0	0	1	0	1	0	1	1	1	1	0	0	0	1	0	0	0	0	1	0	0	0	1	1	1	1	1	1	1	0	1	0	0	0	0	1	0	0	-	0	0	1	0	0	1	0	1
S53 Average	0.28	0.28	0.6	0.72	0.28	0.72	0.28	0	0.28	0.318182	1	1	0	0.64	0.48	1	0.64	0	0	0	0.28	0.72	0	0	0.28	1	1	1	0.28	0.75	1	0.72	0.791667	0	0	0	0	0.28	0	0.235294	0	0.72	0	0.28	0.5	0.5	0.75	0	0.28
S55	0	0	1	1	0	1	1	0	0	1	1	1	1	1	0	1	1	0	0	1	1	1	0	0	1	0	0	0	1	1	0	1	0	1	0	0	0	1	0	0	0	0	0	0	0	0	0	0	1
S55	0	0	1	1	0	1	1	0	0	1	1	1	1	1	0	1	1	0	0	1	1	1	0	0	1	0	0	0	1	1	0	1	0	1	0	0	0	1	0	0	0	0	0	0	0	0	0	0	1
S55	0	0	1	1	0	1	1	0	0	1	1	1	1	1	1	1	1	0	0	1	1	1	0	0	1	0	0	0	1	1	0	1	0	1	0	0	0	1	0	1	0	0	0	0	0	0	0	0	1
S55	0	0	0	1	0	1	1	0	0	1	1	1	1	1	1	1	1	-	0	1	1	1	0	0	1	0	0	0	1	1	0	0	0	-	0	0	0	0	0	-	0	0	0	0	0	0	-	0	1
S55	1	1	1	1	1	0	0	0	1	1	0	0	0	-	-	0	0	1	1	1	1	1	1	1	0	0	1	0	0	1	1	0	1	0	1	1	0	0	1	-	0	0	1	1	0	-	-	0	1
S55 Average	0.2	0.2	0.8	1	0.2	0.8	0.8	0	0.2	1	0.8	0.8	0.8	1	0.5	0.8	0.8	0.25	0.2	1	1	1	0.2	0.2	0.8	0	0.2	0	0.8	1	0.2	0.6	0.2	0.75	0.2	0.2	0	0.6	0.2	0.333333	0	0	0.2	0.2	0	0	0	0	1
S56	0	0	1	1	0	1	1	1	0	0	1	0	1	0	1	0	0	0	0	1	1	0	1	0	0	0	0	0	1	0	1	1	0	1	1	0	0	1	1	-	0	0	0	1	0	0	0	0	0
S56	0	0	1	1	0	0	1	1	0	0	1	0	1	0	1	0	0	0	0	1	1	0	1	0	0	0	0	0	1	0	1	1	0	1	1	0	0	1	1	0	-	0	0	1	0	0	0	0	0
S56	0	0	1	1	0	1	1	1	0	0	1	0	1	0	1	0	0	0	0	1	1	0	1	0	0	0	0	0	1	0	1	1	0	1	1	0	0	1	1	0	0	0	0	1	0	0	0	0	0
S56	0	0	1	1	0	1	1	1	0	0	1	0	1	0	1	0	0	0	0	1	1	0	1	0	0	0	0	0	1	0	1	1	0	1	1	0	0	1	1	0	0	0	0	1	0	0	0	0	0
S56	0	0	1	1	0	0	1	1	0	0	1	0	1	0	1	0	0	0	0	1	1	0	1	0	0	0	0	0	1	0	1	1	0	1	1	0	0	1	1	0	0	0	0	1	0	0	0	0	0
S56	0	0	1	1	0	1	1	1	0	0	1	0	1	0	1	0	0	0	0	1	1	0	1	0	0	0	0	0	1	0	1	1	0	1	1	0	0	1	1	-	0	0	0	1	0	0	0	0	0
S56	0	0	1	1	0	0	1	1	0	0	1	0	1	0	1	0	0	0	0	1	1	0	1	0	0	0	0	0	1	0	1	1	0	1	1	0	0	1	1	0	0	0	0	1	0	0	0	0	0
S56	0	0	1	1	0	1	1	1	0	0	1	0	1	0	1	0	0	0	0	1	1	0	1	0	0	0	0	0	1	0	1	1	0	1	1	0	0	1	1	0	0	0	0	1	0	0	0	0	0
S56 Average	0	0	1	1	0	0.625	1	1	0	0	1	0	1	0	1	0	0	0	0	1	1	0	1	0	0	0	0	0	1	0	1	1	0	1	1	0	0	1	1	0	0	0	0	1	0	0	0	0	0
S57	0	0	1	1	0	1	0	0	0	0	1	0	0	1	0	1	1	0	0	0	1	1	0	0	0	1	1	1	0	1	1	0	0	0	0	0	0	1	0	1	-	0	0	0	0	1	0	1	0
S57	0	0	1	1	0	1	0	0	0	0	1	0	0	1	0	1	1	0	0	0	1	1	0	0	0	1	1	1	0	1	1	0	0	0	0	0	0	1	0	1	-	0	0	0	0	1	0	1	0
S57	0	0	1	1	0	1	0	0	0	0	1	0	0	1	0	1	1	0	0	0	1	1	0	0	0	1	1	1	0	1	1	0	0	0	0	0	0	1	0	1	-	0	0	0	0	1	0	1	0
S57	0	0	1	1	0	-	0	0	0	0	1	1	0	1	0	1	1	0	0	1	1	1	0	0	0	1	1	1	0	0	1	0	0	0	0	0	0	1	0	-	0	1	0	0	1	1	0	1	0
S57	0	0	1	1	0	0	0	0	0	0	1	1	0	1	0	0	1	0	0	1	1	1	0	0	0	1	1	1	0	1	1	0	0	0	0	0	0	1	0	0	0	1	0	0	1	1	0	1	0
S57	0	0	1	1	0	1	0	0	0	0	1	1	0	1	0	1	1	0	0	1	1	1	0	0	0	1	1	1	0	1	1	-	0	0	0	0	0	1	0	0	0	0	0	0	1	1	0	1	0
S57	0	0	1	1	0	1	0	0	0	0	1	0	0	1	0	1	1	0	0	1	1	1	0	0	0	1	1	1	0	1	1	0	0	0	0	0	0	1	0	-	-	1	0	0	1	1	0	1	0
S57	0	0	1	1	0	1	0	0	0	0	1	0	0	1	0	1	1	0	0	1	1	1	0	0	0	1	1	1	0	1	1	0	0	0	0	0	0	1	0	-	-	1	0	0	1	1	0	1	0
S57	0	0	1	1	0	1	0	0	0	0	1	1	0	1	0	1	1	0	0	1	1	1	0	0	0	1	1	1	0	1	1	0	0	0	0	0	0	1	0	1	0	1	0	0	1	1	0	1	0
S57	0	0	1	1	0	1	0	0	0	0	1	1	0	1	0	1	1	0	0	1	1	1	0	0	0	1	1	1	0	1	1	0	0	0	0	0	0	1	0	0	0	1	0	0	0	0	0	0	0
S57	0	0	1	1	0	1	0	0	0	0	1	1	0	1	0	1	1	0	0	1	1	1	0	0	0	1	1	1	0	1	1	0	0	0	0	0	0	1	0	0	0	1	0	0	0	0	0	0	0
S57	0	0	1	1	0	1	0	0	0	0	1	1	0	1	0	1	1	0	0	1	1	1	0	0	0	1	1	1	0	1	1	0	0	0	0	0	0	1	0	0	0	1	0	0	1	1	0	1	0
S57	0	0	1	1	0	1	0	0	0	0	1	1	0	1	0	1	1	0	0	1	1	1	0	0	0	1	1	1	0	1	1	0	0	0	0	0	0	1	0	1	0	1	0	0	1	1	0	1	0
S57	0	0	1	1	0	1	0	0	0	0	1	1	0	0	0	1	1	0	0	1	1	1	0	0	0	1	1	1	0	1	1	1	0	0	0	0	0	1	0	0	0	1	0	0	0	0	0	0	0
S57	0	0	1	1	0	1	0	0	0	0	1	1	0	1	0	1	1	0	0	1	1	1	0	0	0	1	1	1	0	1	1	0	0	0	0	0	0	1	0	1	0	1	0	0	1	1	0	1	0
S57	0	0	1	1	0	1	0	0	0	0	1	1	0	1	0	1	1	0	0	1	1	1	0	0	0	1	1	1	0	1	1	0	0	0	0	0	0	1	0	1	0	1	0	0	1	1	0	1	0
S57	0	0	1	1	0	1	0	0	0	0	1	1	0	1	0	1	1	0	0	1	1	1	0	0	0	1	1	1	0	1	1	0	0	0	0	0	0	1	0	0	0	1	0	0	1	1	0	1	0
S57	0	0	1	1	0	1	0	0	0	0	1	1	0	1	0	1	1	0	0	1	1	1	0	0	0	1	1	1	0	1	1	0	0	0	0	0	0	1	0	0	0	1	0	0	1	1	0	1	0
S57	0	0	1	1	0	1	0	0	0	0	1	1	0	1	0	1	1	0	0	1	1	1	0	0	0	1	1	1	0	1	1	0	0	0	0	0	0	1	0	1	0	1	0	0	1	1	0	1	0
S57	0	0	1	1	0	1	0	0	0	0	1	1	0	1	0	1	1	0	0	1	1	1	0	0	0	1	1	1	0	1	1	0	0	0	0	0	0	1	0	1	0	1	0	0	1	1	0	1	0
S57	0	0	1	1	0	0	0	0	0	0	1	0	0	1	0	1	1	0	0	1	1	1	0	0	0	1	1	1	0	1	1	0	0	0	0	0	0	1	0	0	0	1	0	0	1	1	0	1	0
S57	0	0	1	1	0	1	0	0	0	0	1	1	0	1	0	1	1	0	0	1	1	1	0	-	0	1	1	1	0	1	1	0	0	0	0	0	0	1	0	1	0	1	0	0	1	1	0	1	0
S57	0	0	1	1	0	1	0	0	0	0	1	1	0	1	0	1	1	0	0	1	1	1	0	-	0	1	1	1	0	1	1	0	0	0	0	0	0	1	0	1	0	1	0	0	1	1	0	1	0
S57	0	0	1	1	0	1	0	0	0	0	1	1	0	1	0	1	1	0	0	1	1	1	0	-	0	1	1	1	0	1	1	0	0	0	0	0	0	1	0	1	0	1	0	0	1	1	0	1	0
S57	0	0	1	1	0	1	0	0	0	0	1	1	0	1	0	1	1	0	0	1	1	1	0	0	0	1	1	1	0	1	1	0	0	0	0	0	0	1	0	-	0	1	0	0	1	1	0	1	0
S57	0	1	0	1	0	1	1	1	0	0	0	0	0	0	1	0	1	1	1	1	1	0	1	1	1	1	0	1	1	0	0	0	0	1	0	1	0	0	1	1	0	1	1	0	1	1	1	1	1
S57	0	1	-	1	0	-	1	0	0	0	0	0	0	0	1	0	0	-	1	0	1	0	1	1	0	0	0	1	0	0	0	0	0	-	0	1	0	0	1	-	-	1	1	0	1	1	1	-	1
S57 Average	0	0.0740741	0.961538	1	0	0.92	0.0740741	0.037037	0	0	0.925926	0.703704	0	0.888889	0.0740741	0.888889	0.962963	0.0384615	0.0740741	0.851852	1	0.925926	0.0740741	0.0833333	0.037037	0.962963	0.925926	1	0.037037	0.888889	0.925926	0.0384615	0	0.0384615	0	0.0740741	0	0.925926	0.0740741	0.590909	0	0.851852	0.0740741	0	0.777778	0.888889	0.0740741	0.884615	0.0740741
S58	0	0	0	0	1	1	1	1	0	0	0	0	1	0	1	1	0	1	1	1	1	0	0	1	1	0	1	1	0	0	0	1	0	1	0	0	0	0	0	1	0	0	1	1	1	1	1	0	1
S58	1	1	1	1	0	1	1	0	0	1	1	1	0	0	0	0	1	0	0	0	0	0	0	0	0	1	1	1	0	0	1	0	0	0	0	0	0	0	0	0	0	0	0	0	1	1	0	1	0
S58	1	1	1	1	1	1	1	0	1	1	1	1	1	0	0	0	1	1	1	0	0	1	1	0	1	1	1	1	1	1	1	1	1	0	1	0	1	1	0	1	1	0	1	1	1	1	0	1	1
S58	0	0	1	1	0	0	1	0	0	1	1	1	1	0	0	0	0	0	0	0	0	0	1	0	1	0	0	0	1	1	0	1	1	0	1	0	0	0	0	0	1	0	1	0	0	0	0	1	0
S58	0	1	0	0	1	1	1	1	0	0	1	0	1	0	1	1	0	1	1	1	1	0	0	1	1	0	1	1	1	0	0	1	0	1	0	0	0	0	0	0	0	1	1	1	1	1	1	1	1
S58	0	1	0	0	1	0	1	1	0	0	1	0	1	0	1	1	1	-	1	1	1	0	0	1	1	0	1	1	1	0	0	1	0	1	0	0	0	0	0	-	0	1	1	1	0	1	0	1	1
S58	0	1	0	0	1	1	1	1	0	0	1	0	1	0	1	1	1	0	1	1	0	0	0	1	1	0	1	1	1	0	0	0	0	1	0	0	0	0	0	-	0	1	1	1	1	1	0	1	1
S58	0	1	0	0	1	1	1	1	0	0	1	0	1	0	1	1	1	0	1	1	0	0	0	1	1	0	1	1	1	0	0	0	0	1	0	0	0	0	0	-	0	1	1	1	1	1	0	1	1
S58	0	1	0	0	1	1	1	1	0	0	1	0	1	0	1	1	1	1	1	1	1	0	0	1	1	0	1	1	1	0	0	0	0	1	0	0	0	0	0	-	0	1	1	1	1	1	1	1	1
S58 Average	0.222222	0.777778	0.333333	0.333333	0.777778	0.777778	1	0.666667	0.111111	0.333333	0.888889	0.333333	0.888889	0	0.666667	0.666667	0.666667	0.5	0.777778	0.666667	0.444444	0.111111	0.222222	0.666667	0.888889	0.222222	0.888889	0.888889	0.777778	0.222222	0.222222	0.555556	0.222222	0.666667	0.222222	0	0.111111	0.111111	0	0.4	0.222222	0.555556	0.888889	0.777778	0.777778	0.888889	0.333333	0.888889	0.777778
S59	0	0	1	1	0	1	0	0	0	0	1	1	0	1	0	1	1	0	0	1	1	1	0	0	0	1	1	1	0	1	1	0	0	0	0	0	0	1	0	1	0	1	0	0	1	1	0	1	0
S59	0	0	1	1	0	0	0	0	0	0	1	-	0	1	0	1	1	0	0	1	1	1	0	0	0	1	1	1	0	1	1	-	0	0	0	0	0	1	0	0	0	1	0	0	1	0	0	1	0
S59	0	0	1	1	0	1	0	0	0	0	1	1	0	1	0	1	1	0	0	1	1	1	0	0	0	1	1	1	0	1	1	0	0	0	0	0	0	1	0	1	0	0	0	0	1	1	0	1	0
S59	0	0	1	1	0	1	0	0	0	0	1	1	0	1	0	1	1	0	0	1	1	1	0	0	0	1	1	1	0	1	1	0	0	0	0	0	0	1	0	1	0	1	0	0	1	1	0	1	0
S59	0	0	1	1	0	1	0	0	0	0	1	1	0	1	0	1	1	0	0	1	1	1	0	0	0	1	1	1	0	1	1	0	0	0	0	0	0	1	0	1	0	1	0	0	1	1	0	1	0
S59	0	0	1	1	0	1	0	0	0	0	1	1	0	1	0	1	1	0	0	1	1	1	0	0	0	1	1	1	0	1	1	0	0	0	0	0	0	1	0	1	0	1	0	0	1	1	0	1	0
S59 Average	0	0	1	1	0	0.833333	0	0	0	0	1	1	0	1	0	1	1	0	0	1	1	1	0	0	0	1	1	1	0	1	1	0	0	0	0	0	0	1	0	0.833333	0	0.833333	0	0	1	0.833333	0	1	0
S60	1	1	0	1	0	0	0	0	0	1	1	1	0	0	1	1	1	1	1	0	0	0	0	0	0	0	1	0	0	0	1	1	0	0	1	0	0	0	0	0	-	1	0	1	0	1	0	0	0
S60	1	0	1	0	1	0	1	1	1	0	0	0	1	1	-	0	0	0	0	0	1	1	1	1	1	0	0	0	1	1	0	0	0	1	0	0	0	1	1	0	0	0	1	0	0	0	0	0	0
S60	1	0	1	0	1	1	1	1	0	0	0	0	1	1	0	0	0	0	0	0	0	0	1	0	1	0	0	0	0	0	0	0	0	0	0	0	0	1	1	0	0	0	1	0	0	0	0	0	0
S60	1	0	1	0	1	1	1	1	1	0	0	0	1	1	0	0	0	0	0	0	1	1	1	1	1	0	0	0	1	1	0	1	0	1	0	0	0	1	1	0	0	0	1	0	0	0	0	1	1
S60	1	0	1	0	1	1	1	1	0	0	0	0	1	1	0	0	0	0	0	0	0	0	1	0	1	0	0	0	0	0	0	0	0	0	0	0	0	1	1	0	0	0	1	0	0	0	0	0	0
S60	1	0	1	0	1	1	1	1	1	0	0	0	1	1	0	0	0	0	0	0	1	1	1	1	1	0	0	0	1	1	0	1	0	1	0	0	0	1	1	1	1	0	1	0	0	0	1	1	1
S60	1	0	1	0	1	1	1	1	1	0	0	0	1	1	0	0	0	0	0	0	1	1	1	1	1	0	0	0	1	1	0	1	0	1	0	0	0	1	1	0	1	0	1	0	0	0	1	0	1
S60	1	0	1	0	1	1	1	1	1	0	0	0	1	1	0	0	0	0	0	0	1	1	1	1	1	0	0	0	1	1	0	1	0	1	0	0	0	1	1	1	1	0	1	0	0	0	1	1	1
S60	1	0	1	0	1	1	1	1	1	0	0	0	1	1	0	0	0	0	0	0	1	1	1	1	1	0	0	0	1	1	0	1	0	1	0	0	0	1	1	0	1	0	1	0	0	0	1	1	1
S60	1	0	1	0	1	1	1	1	1	0	0	0	1	1	0	0	0	0	0	0	1	1	1	1	1	0	0	0	1	1	0	1	0	1	0	0	0	1	1	0	1	0	1	0	0	0	1	1	1
S60	1	0	1	0	1	1	1	1	1	0	0	0	1	1	0	0	0	0	0	0	1	1	1	1	1	0	0	0	1	1	0	1	0	1	0	0	0	1	1	0	1	0	1	0	0	0	1	1	1
S60	1	0	1	0	1	1	1	1	1	0	0	0	1	1	0	0	0	0	0	0	1	1	1	1	1	0	0	0	1	1	0	1	0	0	0	0	0	1	1	1	0	0	1	0	0	0	0	1	1
S60	1	0	1	0	1	0	1	1	1	0	0	0	1	1	0	0	0	0	0	0	1	1	1	1	-	0	0	0	1	1	0	1	0	1	0	0	0	1	0	1	1	0	1	0	0	0	0	1	1
S60	1	0	1	0	1	0	1	1	1	0	0	0	1	1	0	0	0	0	0	0	1	1	1	1	-	0	0	0	1	1	0	1	0	1	0	0	0	1	0	1	1	0	1	0	0	0	0	1	1
S60	1	0	1	0	1	0	1	1	1	0	0	0	1	1	0	0	0	0	0	0	1	1	1	1	-	0	0	0	1	1	0	1	0	1	0	0	0	1	0	1	1	0	1	0	0	0	0	1	1
S60	1	0	1	0	1	1	1	1	1	0	0	0	1	1	0	0	0	0	0	0	1	1	1	1	1	0	0	0	1	1	0	1	0	1	0	0	0	1	1	1	1	0	1	0	0	0	1	1	1
S60	1	0	1	0	1	1	1	1	1	0	0	0	1	1	0	0	0	0	0	0	1	1	1	1	1	0	0	0	1	1	0	1	0	0	0	0	0	1	1	1	1	0	1	0	0	0	0	1	1
S60	1	0	1	0	1	0	0	1	1	0	0	0	1	1	-	0	0	0	0	0	1	1	1	-	1	0	0	0	1	1	0	-	0	0	0	0	0	0	0	0	0	-	1	0	0	0	0	1	1
S60	1	0	1	0	1	0	0	1	1	0	0	0	1	1	-	0	0	0	0	0	1	1	1	1	1	0	0	0	1	0	0	0	0	-	0	0	0	1	1	-	1	0	1	0	0	0	1	0	1
S60	1	0	0	0	1	-	1	1	1	0	0	0	1	1	0	0	0	0	0	0	1	1	1	1	1	0	0	0	1	1	0	0	0	1	0	0	0	1	0	-	0	0	1	0	0	0	1	0	1
S60	1	0	1	0	1	0	1	1	1	0	0	0	1	1	0	0	0	0	0	0	1	1	1	1	1	0	0	0	1	0	0	1	0	1	0	0	0	1	1	-	-	0	1	0	0	0	-	1	1
S60	1	0	1	0	1	0	1	1	1	0	0	0	1	1	0	0	0	0	0	0	1	1	1	1	1	0	0	0	1	0	0	1	0	1	0	0	0	1	1	-	-	0	1	0	0	0	-	1	1
S60 Average	1	0.0454545	0.909091	0.0454545	0.954545	0.571429	0.863636	0.954545	0.863636	0.0454545	0.0454545	0.0454545	0.954545	0.954545	0.0526316	0.0454545	0.0454545	0.0454545	0.0454545	0	0.863636	0.863636	0.954545	0.857143	0.947368	0	0.0454545	0	0.863636	0.727273	0.0454545	0.761905	0	0.714286	0.0454545	0	0	0.909091	0.727273	0.444444	0.631579	0.047619	0.954545	0.0454545	0	0.0454545	0.45	0.681818	0.818182
S61	0	0	1	0	0	1	0	1	0	1	0	1	1	1	1	1	1	0	0	0	1	1	0	0	1	0	0	0	1	1	0	0	0	1	0	0	0	0	0	1	0	0	0	0	0	0	0	0	1
S61	0	0	1	0	0	1	0	1	0	1	0	1	1	1	1	1	1	0	0	0	1	1	0	0	1	0	0	0	1	1	0	0	0	1	0	0	0	0	0	0	0	0	0	0	0	0	0	0	1
S61	0	0	1	0	1	1	0	1	0	1	0	1	1	1	1	1	1	0	0	0	1	1	0	0	1	0	0	0	1	1	0	0	0	1	0	0	0	1	0	0	0	0	0	0	0	0	0	0	1
S61	0	0	1	0	1	1	0	1	0	1	0	1	1	1	1	1	1	0	0	0	1	1	0	0	1	0	0	0	1	1	0	0	0	1	0	0	0	1	0	-	0	0	0	0	0	0	0	0	1
S61	0	0	1	0	1	1	0	1	0	1	0	1	1	1	1	1	1	0	0	0	1	1	0	0	1	0	0	0	1	1	0	0	0	1	0	0	0	1	0	-	0	0	0	0	0	0	0	0	1
S61	0	0	1	0	1	1	0	1	0	1	0	1	1	1	0	1	1	0	0	0	1	1	0	0	1	0	0	0	1	1	0	0	0	1	0	0	0	1	0	0	0	0	0	0	0	0	0	0	1
S61	0	0	1	0	1	1	0	1	0	1	0	1	1	1	1	1	1	0	0	0	1	1	0	0	1	0	0	0	1	1	0	0	0	1	0	0	0	1	0	0	0	0	0	0	0	0	0	0	1
S61	0	0	1	0	1	1	0	1	0	1	0	1	1	1	1	1	1	0	0	0	1	1	0	0	1	0	0	0	1	1	0	0	0	1	0	0	0	1	0	0	0	0	0	0	0	0	0	0	1
S61	0	0	1	0	1	1	0	0	0	1	0	1	1	1	1	1	1	0	0	0	1	1	0	0	0	0	0	0	1	1	0	0	0	1	0	0	0	1	0	0	0	0	0	0	0	0	0	0	1
S61	1	1	1	0	0	-	0	0	1	1	1	1	0	1	0	1	-	1	1	1	1	1	0	0	0	0	1	1	0	1	1	0	1	0	1	1	0	1	1	0	-	1	1	0	0	1	0	0	0
S61	0	0	1	0	1	1	0	1	0	1	0	1	1	1	1	1	0	0	0	0	1	1	0	0	1	0	0	0	1	1	0	0	0	1	0	0	0	1	0	0	0	0	0	0	0	0	0	0	1
S61	0	0	1	0	1	1	0	1	0	1	0	1	1	1	1	1	1	0	0	0	1	1	0	0	1	0	0	0	1	1	0	0	0	1	0	0	0	1	0	0	0	0	0	0	0	0	0	0	1
S61	0	0	1	0	1	1	0	1	0	1	0	1	1	1	1	1	1	0	0	0	1	1	0	0	1	0	0	0	1	1	0	0	0	1	0	0	0	1	0	0	0	0	0	0	0	0	0	0	1
S61 Average	0.0769231	0.0769231	1	0	0.769231	1	0	0.846154	0.0769231	1	0.0769231	1	0.923077	1	0.846154	1	0.916667	0.0769231	0.0769231	0.0769231	1	1	0	0	0.846154	0	0.0769231	0.0769231	0.923077	1	0.0769231	0	0.0769231	0.923077	0.0769231	0.0769231	0	0.846154	0.0769231	0.0909091	0	0.0769231	0.0769231	0	0	0.0769231	0	0	0.923077
S62	0	0	1	1	0	1	1	0	0	1	1	1	1	1	1	1	1	0	0	1	1	1	0	0	1	0	0	0	1	1	0	1	0	0	0	0	0	1	0	0	0	0	0	0	0	0	0	0	1
S62	0	0	1	1	0	1	1	0	0	1	1	1	1	1	1	1	1	0	0	1	1	1	0	0	1	0	0	0	1	1	0	1	0	1	0	0	0	1	0	1	0	0	0	0	0	0	0	0	1
S62	-	0	0	1	0	1	1	0	0	1	1	1	1	1	0	1	1	0	0	1	1	1	0	0	0	0	0	0	1	0	0	1	0	1	0	0	0	0	0	0	0	0	0	0	0	0	0	0	1
S62	-	0	1	1	0	1	1	0	0	1	1	1	1	1	0	1	1	0	0	1	1	1	0	0	0	0	0	0	1	0	0	1	0	1	0	0	0	0	0	0	0	0	0	0	0	0	0	0	1
S62	0	0	1	1	0	1	1	0	0	1	1	1	1	1	0	1	1	0	0	1	1	1	0	0	1	0	0	0	1	1	0	0	0	0	0	0	0	1	0	0	-	0	0	0	0	0	0	0	1
S62	0	0	1	1	0	1	1	0	0	1	1	1	1	1	0	1	1	0	0	1	1	1	0	0	1	0	0	0	1	1	0	0	0	0	0	0	0	1	0	0	-	0	0	0	0	0	0	0	1
S62	0	0	1	1	0	1	1	0	0	1	1	1	1	1	1	1	1	0	0	1	1	1	0	0	1	0	0	0	1	1	0	1	0	1	0	0	0	1	0	1	0	0	0	0	0	0	0	0	1
S62	0	0	1	1	0	1	1	0	0	1	1	1	1	1	1	1	1	0	0	1	1	1	0	0	1	0	0	0	1	1	0	1	0	1	0	0	0	1	0	1	0	0	0	0	0	0	0	0	1
S62	0	0	1	1	0	1	1	0	0	1	1	1	1	1	1	1	1	0	0	1	1	1	0	0	1	0	0	0	1	1	0	1	0	1	0	0	0	1	0	1	0	0	0	0	0	0	0	0	1
S62	0	0	1	1	0	1	1	0	0	1	1	1	1	1	0	1	1	0	0	1	1	1	0	0	1	0	0	0	1	1	0	0	0	1	0	0	0	1	0	1	0	0	0	0	0	0	0	0	1
S62	0	0	1	1	0	1	1	0	0	1	1	1	1	1	1	1	1	0	0	1	1	1	0	0	1	0	0	0	1	1	0	1	0	1	0	0	0	1	0	1	0	0	0	0	0	0	0	0	1
S62	0	0	1	1	0	1	1	0	0	1	1	1	1	1	1	1	1	0	0	1	1	1	0	0	1	0	0	0	1	1	0	1	0	1	0	0	0	1	0	1	0	0	0	0	0	0	0	0	1
S62	0	0	1	1	0	1	1	0	0	1	1	1	1	1	1	1	1	0	0	1	1	1	0	0	1	0	0	0	1	1	0	1	0	1	0	0	0	1	0	1	0	0	0	0	0	0	0	0	1
S62	0	0	1	1	0	1	1	0	0	1	1	1	1	1	1	1	1	0	0	1	1	1	0	0	1	0	0	0	1	1	0	1	0	1	0	0	0	1	0	1	0	0	0	0	0	0	0	0	1
S62	0	0	1	1	0	1	1	0	0	1	1	1	1	1	1	1	1	0	0	1	1	1	0	0	1	0	0	0	1	1	0	1	0	1	0	0	0	1	0	0	0	0	0	0	0	0	0	0	1
S62	0	0	1	1	0	1	1	0	0	1	1	1	1	1	1	1	1	0	0	1	1	1	0	0	1	0	0	0	1	1	0	1	0	1	0	0	0	1	0	0	0	0	0	0	0	0	0	0	1
S62	0	0	1	1	0	1	1	0	0	1	1	1	1	1	1	1	1	0	0	1	1	1	0	0	1	0	0	0	1	1	0	1	0	1	0	0	0	1	0	0	0	0	0	0	0	0	0	0	1
S62	0	0	1	1	0	1	1	0	0	1	1	1	1	1	1	1	1	0	0	1	1	1	0	0	1	0	0	0	1	1	0	1	0	1	0	0	0	1	0	0	0	0	0	0	0	0	0	0	1
S62	0	0	1	1	0	1	1	0	0	1	1	1	1	1	1	1	1	0	0	1	1	1	0	0	1	0	0	0	1	1	0	1	0	1	0	0	0	1	0	0	0	0	0	0	0	0	0	0	1
S62	0	0	1	1	0	1	1	0	0	1	1	1	1	1	1	1	1	0	0	1	1	1	0	0	1	0	0	0	1	1	0	1	0	1	0	0	0	1	0	0	0	0	0	0	0	0	0	0	1
S62	0	0	1	1	0	1	1	0	0	1	1	1	1	1	1	1	1	0	0	1	1	1	0	0	1	0	0	0	1	1	0	1	0	1	0	0	0	1	0	0	0	0	0	0	0	0	0	0	1
S62	0	0	0	0	0	0	1	0	0	1	1	0	1	1	1	1	0	0	0	1	1	1	0	0	1	0	0	0	1	1	0	1	0	0	0	0	0	1	0	-	0	0	0	0	0	0	0	0	1
S62	0	0	0	0	0	0	1	0	0	1	1	0	1	1	1	1	0	0	0	1	1	1	0	0	1	0	0	0	1	1	0	1	0	0	0	0	0	1	0	-	0	0	0	0	0	0	0	0	1
S62	0	0	1	1	0	0	1	0	0	1	1	1	1	1	1	1	0	0	0	1	1	1	0	0	1	0	0	0	1	1	0	1	0	1	0	0	0	1	0	0	0	0	0	0	0	0	0	0	1
S62 Average	0	0	0.875	0.916667	0	0.875	1	0	0	1	1	0.916667	1	1	0.791667	1	0.875	0	0	1	1	1	0	0	0.916667	0	0	0	1	0.916667	0	0.875	0	0.791667	0	0	0	0.916667	0	0.409091	0	0	0	0	0	0	0	0	1
S63	1	1	0	1	1	0	0	0	1	0	1	0	0	1	0	0	0	1	1	0	0	0	0	0	1	1	1	1	1	0	0	1	1	0	0	0	0	0	0	0	0	1	0	0	0	1	1	0	0
S63	1	1	0	1	1	1	0	0	1	0	1	0	0	1	0	0	0	0	1	0	0	0	0	0	1	1	1	1	1	0	0	0	1	0	0	0	0	0	0	-	1	0	0	0	0	1	1	0	0
S63	1	1	0	1	1	1	0	0	1	0	1	0	0	1	0	0	0	0	1	0	0	0	0	0	1	1	1	1	1	0	0	0	1	0	0	0	0	0	0	-	1	0	0	0	0	1	1	0	0
S63	1	1	0	1	0	1	0	0	0	0	1	0	0	1	0	0	0	0	0	0	0	0	0	0	1	1	1	1	0	0	0	0	1	0	0	0	0	0	0	-	1	0	0	0	0	1	0	0	0
S63	1	1	0	1	1	0	0	0	1	0	1	0	0	0	0	0	0	-	1	0	0	0	0	0	-	1	1	1	1	0	0	-	0	0	0	0	0	0	0	-	-	0	0	0	0	1	0	-	0
S63	1	1	0	1	1	0	0	0	1	0	1	0	0	0	0	0	0	-	1	0	0	0	0	0	-	1	1	1	1	0	0	-	0	0	0	0	0	0	0	-	-	0	0	0	0	1	0	-	0
S63	1	1	0	1	1	0	0	0	1	0	1	0	0	0	0	0	0	-	1	0	0	0	0	0	-	1	1	1	1	0	0	-	0	0	0	0	0	0	0	-	-	0	0	0	0	1	0	-	0
S63	1	1	0	1	1	1	0	0	1	0	1	0	0	1	0	0	0	1	1	0	0	0	0	0	1	1	1	1	1	0	0	1	1	0	0	0	0	0	0	0	1	1	0	0	0	1	1	0	0
S63	1	1	0	1	1	1	0	0	1	0	1	0	0	1	0	0	0	1	1	0	0	0	0	0	1	1	1	1	1	0	0	1	1	0	0	0	0	0	0	0	1	1	0	0	0	1	1	0	0
S63	1	1	0	1	1	1	0	0	1	0	1	0	0	1	0	0	0	1	1	0	0	0	0	0	1	1	1	1	1	0	0	0	1	0	0	0	0	0	0	0	1	1	0	0	0	1	1	0	0
S63	1	1	0	1	1	1	0	0	1	0	1	0	0	1	0	0	0	1	1	0	0	0	0	0	1	1	1	1	1	0	0	1	1	0	0	0	0	0	0	0	1	1	0	0	0	1	1	0	0
S63	1	1	0	1	1	1	0	0	1	0	1	0	0	1	0	0	0	1	1	0	0	0	0	0	1	1	1	1	1	0	0	1	1	0	0	0	0	0	0	0	1	1	0	0	0	1	1	0	0
S63	1	1	0	1	0	1	0	0	1	0	0	1	0	0	-	0	-	0	1	0	0	0	0	0	0	0	1	1	1	-	0	0	0	0	0	0	0	0	0	-	1	0	0	0	0	1	1	0	0
S63	1	1	0	1	0	1	0	0	1	0	0	1	0	0	-	0	-	0	1	0	0	0	0	0	0	0	1	1	1	-	0	0	0	0	0	0	0	0	0	-	1	0	0	0	0	1	1	0	0
S63	1	1	0	1	1	1	0	0	1	0	1	0	0	1	0	0	0	1	1	0	0	0	0	0	1	1	1	1	1	0	0	1	1	0	0	0	0	0	0	0	1	1	0	0	0	1	1	0	0
S63	1	1	0	1	1	1	0	0	1	0	1	0	0	1	0	0	0	1	1	0	0	0	0	0	1	1	1	1	1	0	0	1	1	0	0	0	0	0	0	0	1	1	0	0	0	1	1	0	0
S63	1	1	0	1	1	1	0	0	1	0	1	0	0	1	0	0	0	1	1	0	0	0	0	0	1	1	1	1	1	0	0	1	1	0	0	0	0	0	0	0	1	1	0	0	0	1	0	0	0
S63	1	1	-	1	1	0	0	0	1	-	1	0	0	0	-	0	0	1	1	0	0	0	0	0	0	1	1	1	1	0	0	0	1	-	0	0	0	0	0	0	-	1	0	0	0	1	0	0	0
S63	1	1	-	1	1	0	0	0	1	-	1	0	0	0	-	0	0	1	1	0	0	0	0	0	0	1	1	1	1	0	0	0	1	-	0	0	0	0	0	0	-	1	0	0	0	1	0	0	0
S63	1	1	-	1	1	0	0	0	1	-	1	0	0	0	-	0	0	1	1	0	0	0	0	0	0	1	1	1	1	0	0	0	1	-	0	0	0	0	0	0	-	1	0	0	0	1	0	0	0
S63	1	1	0	1	0	1	0	0	0	0	1	0	0	1	0	0	0	0	0	0	0	0	0	0	1	1	1	1	0	0	0	0	1	0	0	0	0	0	0	0	1	0	0	0	0	1	0	0	0
S63	1	1	0	1	0	1	0	0	1	0	1	0	0	1	0	0	0	0	1	0	0	0	0	0	1	1	1	1	0	0	0	0	1	0	0	0	0	0	0	0	1	1	0	0	0	1	0	0	0
S63	1	1	0	1	1	1	0	0	1	0	1	0	0	1	0	0	0	0	1	0	0	0	0	0	1	1	1	1	1	0	0	1	1	0	0	0	0	0	0	0	0	1	0	0	0	1	0	0	0
S63	1	1	0	1	1	1	0	0	1	0	1	0	0	1	0	0	0	1	1	0	0	0	0	0	1	1	1	1	1	0	0	1	1	0	0	0	0	0	0	0	1	1	0	0	0	1	0	0	0
S63 Average	1	1	0	1	0.791667	0.708333	0	0	0.916667	0	0.916667	0.0833333	0	0.666667	0	0	0	0.619048	0.916667	0	0	0	0	0	0.761905	0.916667	1	1	0.875	0	0	0.47619	0.791667	0	0	0	0	0	0	0	0.888889	0.625	0	0	0	1	0.5	0	0
S64	1	1	0	1	1	-	0	0	1	0	1	1	0	1	0	0	0	1	1	0	0	0	1	0	1	1	1	0	1	0	1	1	1	0	0	1	0	0	0	0	1	0	1	0	0	1	1	0	0
S64	1	1	0	1	1	-	0	0	1	0	1	1	0	1	0	0	0	1	1	0	0	0	1	0	1	1	1	0	1	0	1	1	1	0	0	1	0	0	0	0	1	0	1	0	0	1	1	0	0
S64	1	1	0	1	1	0	0	0	1	0	1	1	0	1	0	0	0	1	1	0	0	0	1	0	1	1	1	1	1	0	1	1	1	0	0	1	0	0	0	0	0	0	1	0	0	1	1	0	0
S64	1	1	0	1	1	0	0	0	1	0	1	1	0	1	0	0	0	1	1	0	0	0	1	0	1	1	1	1	1	0	1	1	1	0	0	1	0	0	0	0	1	0	1	0	0	1	1	0	0
S64	1	1	0	1	1	0	0	0	1	0	1	1	0	1	0	0	0	1	1	0	0	0	1	0	1	1	1	1	1	0	1	1	1	0	0	1	0	0	0	0	1	0	1	0	0	1	1	0	0
S64	1	1	0	1	1	0	0	0	1	0	0	1	0	1	0	0	0	0	0	0	0	0	0	0	1	0	1	1	1	0	1	-	1	0	0	1	0	0	0	0	0	0	1	0	0	1	0	0	0
S64	1	1	0	1	1	0	0	0	1	0	0	1	0	1	0	0	0	0	0	0	0	0	0	0	1	0	1	1	1	0	1	-	1	0	0	1	0	0	0	0	0	0	1	0	0	1	0	0	0
S64	1	1	0	1	1	0	0	0	1	0	1	1	0	1	0	0	0	1	1	0	0	0	1	0	1	1	1	1	1	0	1	1	1	0	0	1	0	0	0	0	1	0	1	0	0	1	1	0	0
S64	1	1	0	1	1	0	0	0	1	0	1	1	0	1	0	0	0	1	1	0	0	0	1	0	1	1	1	1	1	0	1	1	1	0	0	1	0	0	0	0	1	0	1	0	0	1	1	0	0
S64	1	1	0	1	1	0	0	0	1	0	1	1	0	1	0	0	-	1	1	0	0	0	1	0	0	1	0	1	1	0	1	0	1	0	0	1	-	0	0	-	0	0	1	0	0	1	1	0	0
S64	1	1	0	1	1	0	0	0	1	0	1	1	0	1	0	0	-	1	1	0	0	0	1	0	0	1	0	1	1	0	1	0	1	0	0	1	-	0	0	-	0	0	1	0	0	1	1	0	0
S64	1	1	0	1	1	0	0	0	0	0	1	1	0	1	0	0	0	0	1	0	0	0	1	0	0	-	1	1	1	0	1	-	1	-	0	1	0	0	0	0	0	0	1	0	0	1	0	0	0
S64	1	1	0	1	1	0	0	0	0	0	1	1	0	1	0	0	0	0	1	0	0	0	1	0	0	-	1	1	1	0	1	-	1	-	0	1	0	0	0	0	0	0	1	0	0	1	0	0	0
S64	1	1	0	1	1	-	0	0	1	0	1	0	0	1	0	0	0	-	1	0	0	0	1	0	0	1	1	0	0	0	1	1	0	-	0	1	0	0	0	-	0	0	1	0	0	1	0	0	0
S64	1	1	0	1	1	-	0	0	1	0	1	0	0	1	0	0	0	-	1	0	0	0	1	0	0	1	1	0	-	0	1	1	0	-	0	1	0	0	0	-	0	0	1	0	0	1	0	0	0
S64	1	1	0	1	1	0	0	0	1	0	1	0	0	1	0	0	0	1	1	0	0	0	1	0	1	1	1	1	1	0	1	1	1	0	0	1	0	0	0	0	0	0	1	0	0	1	-	0	0
S64	1	1	0	1	1	0	0	0	1	0	1	0	0	1	0	0	0	1	1	0	0	0	1	0	1	1	1	1	1	0	1	1	1	0	0	1	0	0	0	0	0	0	1	0	0	1	-	0	0
S64	1	1	0	1	1	0	0	0	1	0	1	0	0	1	0	0	0	1	1	0	0	0	1	0	1	1	1	1	1	0	1	1	1	0	0	1	0	0	0	0	0	0	1	0	0	1	-	0	0
S64 Average	1	1	0	1	1	0	0	0	0.888889	0	0.888889	0.722222	0	1	0	0	0	0.75	0.888889	0	0	0	0.888889	0	0.666667	0.875	0.888889	0.777778	0.941176	0	1	0.857143	0.888889	0	0	1	0	0	0	0	0.333333	0	1	0	0	1	0.6	0	0
S65	0	0	1	1	0	0	1	0	0	0	0	1	1	1	1	0	0	0	0	0	0	0	0	0	1	1	1	0	0	1	0	1	0	1	0	1	1	1	1	0	0	1	1	1	0	0	0	0	1
S65	0	1	1	1	0	0	1	0	0	0	0	1	1	1	0	0	0	0	0	1	0	1	0	0	0	0	1	0	0	1	0	0	0	1	0	1	0	1	1	1	1	1	1	1	0	0	0	0	1
S65	1	1	0	0	1	0	0	0	1	0	1	1	0	0	0	1	0	0	0	1	1	0	1	0	1	1	1	1	1	1	1	0	1	0	1	1	0	0	0	0	0	0	0	1	0	0	0	1	1
S65	0	1	0	1	0	1	1	1	1	1	1	0	1	1	1	0	0	0	0	0	0	0	1	0	0	1	1	0	1	1	1	1	0	0	1	1	1	1	1	1	0	0	1	1	1	1	1	0	0
S65	0	1	0	0	0	0	1	1	1	1	0	0	0	1	0	0	0	0	0	0	0	0	1	0	0	1	0	0	1	1	0	0	0	0	1	1	1	0	0	1	0	0	1	0	1	0	0	0	0
S65	0	0	1	1	0	1	0	1	0	0	1	1	1	0	1	0	0	0	0	1	0	0	1	0	0	1	1	0	1	0	1	1	0	0	1	0	0	1	1	0	0	0	0	1	0	1	1	0	0
S65	0	0	1	1	0	1	0	1	0	0	1	1	1	0	0	0	0	0	0	1	0	0	0	0	0	1	1	0	1	0	1	1	0	0	1	0	0	1	0	0	0	0	0	1	0	1	-	0	0
S65	0	0	1	1	0	1	0	1	0	0	1	1	1	0	1	0	-	0	0	1	0	0	1	0	0	1	1	0	0	0	1	0	0	0	1	0	0	0	1	-	0	0	0	1	0	1	-	0	0
S65	0	0	0	1	0	0	0	1	0	0	1	1	1	0	0	0	0	0	0	1	0	0	0	0	0	1	1	0	1	0	1	0	0	0	1	0	0	1	1	-	0	0	0	0	0	1	1	0	0
S65	0	0	0	1	0	0	0	1	0	0	1	1	1	0	0	0	0	0	0	1	0	0	0	0	0	1	1	0	1	0	1	0	0	0	1	0	0	1	1	-	0	0	0	0	0	1	1	0	0
S65	0	0	0	1	0	0	0	1	0	0	1	1	1	0	0	0	0	0	0	1	0	0	0	0	0	1	1	0	1	0	1	0	0	0	1	0	0	1	1	-	0	0	0	0	0	1	1	0	0
S65	0	0	0	1	0	0	0	1	0	0	1	1	1	0	0	0	0	0	0	1	0	0	0	0	0	1	1	0	1	0	1	0	0	0	1	0	0	1	1	-	0	0	0	0	0	1	1	0	0
S65	0	0	0	1	0	1	0	-	0	0	1	1	1	0	1	0	0	0	0	1	0	0	1	0	0	1	1	0	1	0	1	0	0	0	1	0	0	1	1	-	0	0	0	0	0	1	0	0	0
S65 Average	0.0769231	0.307692	0.384615	0.846154	0.0769231	0.384615	0.307692	0.75	0.230769	0.153846	0.769231	0.846154	0.846154	0.307692	0.384615	0.0769231	0	0	0	0.769231	0.0769231	0.0769231	0.461538	0	0.153846	0.923077	0.923077	0.0769231	0.769231	0.384615	0.769231	0.307692	0.0769231	0.153846	0.846154	0.384615	0.230769	0.769231	0.769231	0.428571	0.0769231	0.153846	0.307692	0.538462	0.153846	0.692308	0.545455	0.0769231	0.230769
S66	0	1	0	0	1	0	1	0	1	1	1	0	1	0	0	1	0	1	1	0	1	0	0	1	1	0	0	1	1	0	0	0	0	0	0	0	1	0	0	1	0	1	0	1	0	1	0	1	1
S66	0	1	0	0	1	0	1	0	1	1	1	0	1	0	0	1	0	1	1	0	1	0	0	1	1	0	0	1	1	0	0	0	0	0	0	0	1	0	0	1	0	1	0	1	0	1	0	1	1
S66	0	1	0	0	1	0	1	0	1	1	1	0	1	0	0	1	0	1	1	0	1	0	0	1	1	0	0	1	1	0	0	0	0	0	0	0	1	0	0	1	0	1	0	1	0	1	0	1	1
S66	0	1	0	0	1	1	1	1	1	1	1	1	1	0	0	1	1	0	1	0	1	0	0	1	1	0	1	1	1	0	0	1	1	0	0	0	1	0	0	0	0	1	0	1	0	1	0	0	1
S66	0	1	0	0	1	1	1	1	1	1	1	1	1	0	0	1	1	1	1	0	1	0	0	1	1	0	1	1	1	0	0	1	1	0	0	0	1	0	0	1	0	1	0	1	0	1	0	1	1
S66	0	1	0	0	1	1	1	1	1	1	1	1	1	0	0	1	1	1	1	0	1	0	0	1	1	0	1	1	1	0	0	1	1	0	0	0	1	0	0	1	0	1	0	1	0	1	0	1	1
S66	0	1	0	0	1	1	1	1	1	1	1	1	1	0	0	1	1	1	1	0	1	0	0	1	1	0	1	1	1	0	0	1	1	0	0	0	1	0	0	1	0	1	0	1	0	1	0	1	1
S66	0	1	0	0	1	1	1	1	1	1	1	1	1	0	0	1	1	1	1	0	1	0	0	1	1	0	1	1	1	0	0	1	1	0	0	0	1	0	0	1	0	1	0	1	0	1	0	1	1
S66	0	1	0	0	1	1	1	1	1	1	1	1	1	0	0	1	1	1	1	0	1	0	0	1	1	0	1	1	1	0	0	1	1	0	0	0	1	0	0	1	0	1	0	1	0	1	0	1	1
S66	0	1	0	0	1	1	1	1	0	1	1	1	1	0	0	0	1	0	0	0	1	0	0	1	0	0	0	0	1	0	0	0	0	0	0	0	1	0	0	-	0	0	0	1	0	1	0	1	1
S66	0	1	0	0	1	1	1	1	1	1	1	0	1	0	0	1	1	1	1	0	1	0	0	1	1	0	1	1	1	0	0	0	1	0	0	0	1	0	0	0	0	1	0	1	0	1	0	1	1
S66	0	1	0	0	1	1	1	1	1	1	1	1	1	0	0	1	1	1	1	0	1	0	0	1	1	0	1	1	1	0	0	1	1	0	0	0	1	0	0	1	0	1	0	1	0	1	0	1	1
S66	0	1	0	0	1	1	1	0	1	1	1	-	1	0	0	1	0	0	1	0	1	0	0	1	1	0	1	1	1	-	0	-	1	-	0	0	0	0	0	-	-	-	0	1	0	1	0	1	1
S66	0	1	0	0	1	1	1	0	1	1	1	-	1	0	0	1	0	0	1	0	1	0	0	1	1	0	1	1	1	-	0	-	1	-	0	0	0	0	0	-	-	-	0	1	0	1	0	1	1
S66	0	1	0	0	1	1	1	1	1	1	1	1	1	0	0	1	1	1	1	0	1	0	0	1	1	0	1	1	1	0	0	1	1	0	0	0	1	0	0	1	0	1	0	1	0	1	0	1	1
S66	0	1	0	0	1	1	1	1	1	1	1	1	1	0	0	1	1	1	1	0	1	0	0	1	1	0	1	1	1	0	0	1	1	0	0	0	1	0	0	1	0	1	0	1	0	1	0	1	1
S66	1	1	1	1	0	1	0	1	0	-	1	1	1	1	1	1	1	0	0	1	0	1	0	1	1	1	0	0	0	1	1	1	1	1	0	0	0	1	0	0	1	0	1	1	0	0	1	1	1
S66	0	0	0	0	0	0	1	0	1	1	1	1	1	0	0	1	1	1	1	0	1	0	0	0	-	0	1	1	0	0	0	-	1	0	0	0	0	0	0	0	0	0	0	1	0	1	0	-	1
S66	0	1	0	0	1	-	1	1	1	0	1	0	1	0	0	1	1	1	1	0	1	0	0	1	1	0	1	1	1	0	0	0	1	0	0	0	1	0	0	0	0	0	0	1	0	1	-	0	1
S66	0	1	0	0	1	1	1	1	1	1	1	1	1	0	0	1	1	0	1	0	1	0	0	1	1	0	1	1	1	0	0	1	1	0	0	0	0	0	0	-	0	1	0	1	0	0	0	-	1
S66	0	1	0	0	1	1	1	1	1	1	1	1	1	0	0	1	1	0	1	0	1	0	0	1	1	0	1	1	1	0	0	1	1	0	0	0	0	0	0	-	0	1	0	1	0	0	0	-	1
S66	0	1	0	0	1	1	1	1	1	1	1	1	1	0	0	1	1	0	1	0	1	0	0	1	1	0	1	1	1	0	0	1	1	0	0	0	0	0	0	-	0	1	0	1	0	0	0	-	1
S66	0	1	0	0	1	1	1	1	1	1	1	1	1	0	0	1	1	0	1	0	1	0	0	1	1	0	1	1	1	0	0	1	1	0	0	0	1	0	0	1	0	0	0	1	0	1	0	1	1
S66	0	1	0	0	1	1	1	1	1	1	1	1	1	0	0	1	1	0	1	0	1	0	0	1	1	0	1	1	1	0	0	1	1	0	0	0	1	0	0	1	0	0	0	1	0	1	0	1	1
S66	0	1	0	0	0	0	0	0	1	1	1	1	1	0	0	1	0	1	1	0	1	0	-	0	1	0	1	1	1	0	0	1	1	0	0	0	1	0	0	0	0	1	0	1	0	1	-	1	1
S66	0	1	0	0	1	1	1	1	1	1	1	1	1	0	0	1	1	1	1	0	1	0	0	1	1	0	1	1	1	0	0	1	1	0	0	0	1	0	0	1	0	1	0	1	0	1	0	0	1
S66	0	1	0	0	1	1	1	1	1	1	1	1	1	0	0	1	1	1	1	0	1	0	0	1	1	0	1	1	1	0	0	1	1	0	0	0	1	0	0	1	0	1	0	1	0	1	0	1	1
S66	0	1	0	0	0	1	1	1	0	1	1	1	1	0	0	1	1	0	0	0	0	0	0	0	1	0	1	1	1	0	0	0	0	0	0	0	0	0	0	0	0	0	0	0	0	0	0	0	0
S66	0	1	0	0	1	1	1	1	1	1	1	1	1	0	0	1	1	1	1	0	1	0	0	1	1	0	1	1	1	0	0	0	1	0	0	0	1	0	0	1	0	1	0	1	0	1	0	1	1
S66	0	1	0	0	1	1	1	1	1	1	1	1	1	0	0	1	1	1	1	0	1	0	0	1	1	0	1	1	1	0	0	0	1	0	0	0	1	0	0	1	0	1	0	1	0	1	0	1	0
S66	0	1	0	0	1	1	1	1	1	1	1	1	1	0	0	1	1	1	1	0	1	0	0	1	1	0	1	1	1	0	0	0	1	0	0	0	1	0	0	1	0	1	0	1	0	1	0	1	0
S66	0	1	0	0	1	1	1	1	1	1	1	1	1	0	0	1	1	1	1	0	1	0	0	1	1	0	1	1	1	0	0	1	1	0	0	0	1	0	0	1	0	1	0	1	0	1	0	1	1
S66	0	1	0	0	1	1	1	1	1	1	1	1	1	0	0	1	1	1	1	0	1	0	0	1	1	0	1	1	1	0	0	1	1	0	0	0	1	0	0	0	0	1	0	1	0	1	0	1	1
S66	0	1	0	0	1	0	1	1	1	1	1	1	1	0	0	1	1	1	1	0	1	0	0	1	0	0	1	1	1	0	0	1	1	0	0	0	1	0	0	1	0	1	0	1	0	1	0	0	1
S66	0	1	0	0	1	0	1	1	1	1	1	1	1	0	0	1	0	1	1	0	1	0	0	1	1	0	1	1	1	0	0	1	0	0	0	0	1	0	0	1	0	1	0	1	0	1	0	0	1
S66 Average	0.0285714	0.971429	0.0285714	0.0285714	0.885714	0.794118	0.942857	0.8	0.914286	0.970588	1	0.848485	1	0.0285714	0.0285714	0.971429	0.8	0.685714	0.914286	0.0285714	0.942857	0.0285714	0	0.914286	0.941176	0.0285714	0.857143	0.942857	0.942857	0.030303	0.0285714	0.6875	0.828571	0.030303	0	0	0.771429	0.0285714	0	0.724138	0.030303	0.787879	0.0285714	0.971429	0	0.857143	0.030303	0.806452	0.914286
S67	1	1	0	0	1	0	0	0	0	1	1	1	0	0	0	1	0	0	0	1	0	0	1	0	1	1	1	1	1	1	1	0	1	0	1	1	0	1	0	0	1	0	1	1	0	0	1	1	1
S67	1	1	0	0	1	0	0	0	1	1	1	1	0	0	0	1	0	0	0	1	0	0	1	0	1	1	1	1	1	1	1	0	1	0	1	1	0	1	0	-	-	0	1	1	0	0	1	0	1
S67	1	0	0	0	1	0	0	0	1	0	1	1	0	0	0	1	0	0	0	1	0	0	1	0	1	1	1	1	1	0	1	1	1	0	1	1	0	1	0	0	1	0	1	1	0	0	0	0	1
S67	1	1	0	0	0	0	0	0	1	1	1	1	0	0	0	1	0	0	0	1	0	0	1	0	1	1	1	1	1	0	1	1	1	0	1	1	0	1	0	1	1	0	1	1	0	0	0	1	1
S67	1	1	0	0	1	0	0	0	1	1	1	1	0	0	0	1	0	0	0	1	0	0	1	0	1	1	1	1	1	0	1	1	1	0	1	1	0	1	0	1	0	0	1	1	0	0	0	1	1
S67	1	1	0	0	1	0	0	0	1	1	1	1	0	0	0	1	0	0	0	1	0	0	1	0	1	1	1	1	1	0	1	1	1	0	1	1	0	1	0	1	0	0	1	1	0	0	0	1	1
S67	1	1	0	1	1	0	1	1	0	1	1	0	1	0	1	1	0	0	0	0	1	1	0	0	1	1	1	1	1	0	0	0	0	1	1	1	0	0	0	0	0	1	1	0	1	0	0	-	0
S67	0	1	1	1	1	0	1	0	0	1	0	1	1	1	1	1	0	0	0	0	1	1	0	1	0	1	0	1	1	0	0	0	0	1	1	1	0	0	0	0	0	0	0	0	1	0	1	-	1
S67	0	1	0	0	1	0	0	0	1	1	1	1	0	0	-	1	0	0	0	1	0	0	1	0	1	1	1	1	1	0	1	0	1	0	1	1	0	1	0	1	0	0	1	1	0	0	1	1	1
S67	0	1	0	0	1	0	0	0	1	1	1	1	0	0	-	1	0	0	0	1	0	0	1	0	1	1	1	1	1	0	1	0	1	0	1	1	0	1	0	1	0	0	1	1	0	0	1	1	1
S67	1	1	0	0	1	0	0	0	0	1	1	1	0	0	0	1	0	0	0	0	0	0	1	0	1	1	1	1	0	0	1	0	1	0	1	1	0	1	0	1	1	0	1	0	0	0	0	1	0
S67	1	1	0	0	1	0	0	0	0	1	1	1	0	0	0	1	0	0	0	0	0	0	1	0	1	1	1	1	0	0	1	0	1	0	1	1	0	1	0	0	1	0	1	0	0	0	0	1	0
S67	1	1	0	0	1	0	0	0	1	1	1	1	0	0	0	1	0	0	0	1	0	0	1	0	1	1	1	1	1	0	1	1	1	0	0	1	0	1	0	0	1	0	1	1	0	0	1	1	1
S67	1	1	0	0	1	0	0	0	1	1	1	1	0	0	0	1	0	0	0	1	0	0	1	0	1	1	1	1	1	0	1	1	1	0	0	1	0	1	0	0	1	0	1	1	0	0	1	1	1
S67	1	1	0	0	1	0	0	0	1	1	1	1	0	0	0	1	0	0	0	1	0	0	1	0	1	1	1	1	1	0	1	1	1	0	1	1	0	1	0	1	0	0	1	1	0	0	0	1	1
S67	1	1	0	0	1	0	0	0	1	1	1	1	0	0	0	1	0	0	0	1	0	0	1	0	1	1	1	1	1	0	1	1	1	0	1	1	0	1	0	1	0	0	1	1	0	0	1	1	1
S67	1	1	0	0	1	0	0	0	1	1	1	1	0	0	0	1	0	0	0	1	0	0	1	0	1	1	1	1	1	0	1	1	1	0	1	1	0	1	0	1	0	0	1	1	0	0	1	1	1
S67	1	1	0	0	1	0	0	0	1	1	1	1	0	0	0	1	0	0	0	1	0	0	1	0	1	1	1	1	1	0	1	1	1	0	1	1	0	1	0	0	0	0	1	1	0	0	1	1	1
S67	1	1	0	0	1	0	0	0	1	1	1	1	0	0	0	1	0	0	0	1	0	0	1	0	1	1	1	1	1	0	1	1	0	0	1	1	0	0	0	0	1	0	1	1	0	0	0	1	1
S67	1	1	0	0	1	-	0	0	1	1	1	0	0	-	0	1	0	0	0	0	0	0	1	0	1	1	1	1	1	0	1	1	1	0	1	1	0	1	0	0	0	0	1	1	0	0	0	0	1
S67	1	1	1	1	0	1	1	0	0	1	1	1	0	0	0	0	1	0	0	0	0	0	0	0	1	1	1	1	0	0	0	0	0	0	0	0	0	0	0	1	0	0	0	0	1	0	0	1	0
S67	1	1	1	1	0	1	1	0	0	1	1	1	0	0	0	0	1	0	0	0	0	0	0	0	1	1	1	1	0	0	0	0	0	0	0	0	0	0	0	1	0	0	0	0	0	0	0	1	0
S67	1	1	1	1	0	1	1	0	0	1	1	1	0	0	0	0	1	0	0	0	0	0	0	0	1	1	1	1	0	0	0	0	0	0	0	0	0	1	0	1	0	0	0	0	1	0	0	1	0
S67	1	1	1	1	0	1	1	0	0	1	1	1	0	0	0	0	1	0	0	0	0	0	0	0	0	1	1	1	0	0	0	0	0	0	0	0	0	1	0	0	0	0	0	0	1	0	0	1	0
S67	1	1	1	1	0	1	1	0	0	1	1	1	0	0	0	0	1	0	0	0	0	0	0	0	0	1	1	1	0	0	0	0	0	0	0	0	0	1	0	0	0	0	0	0	1	0	0	1	0
S67 Average	0.88	0.96	0.24	0.28	0.76	0.208333	0.28	0.04	0.6	0.96	0.96	0.92	0.08	0.0416667	0.0869565	0.8	0.2	0	0	0.6	0.08	0.08	0.72	0.04	0.88	1	0.96	1	0.72	0.08	0.72	0.48	0.68	0.08	0.72	0.8	0	0.8	0	0.5	0.333333	0.04	0.76	0.64	0.24	0	0.4	0.869565	0.68
S68	1	0	1	1	1	0	0	1	1	1	1	1	0	1	1	1	1	0	1	1	1	0	1	1	1	1	1	1	1	1	1	0	0	0	1	1	1	1	1	-	0	0	1	0	1	1	-	1	1
S68	1	0	0	1	1	1	1	1	1	1	1	1	1	1	0	1	1	1	1	1	1	0	1	1	1	1	1	1	1	1	1	0	0	0	1	1	1	1	0	-	0	1	0	1	0	1	-	1	0
S68	1	0	0	1	1	1	1	1	1	1	1	1	1	1	0	1	1	1	1	1	1	0	1	1	1	1	1	1	1	1	1	0	0	0	1	1	1	1	0	-	0	1	0	1	0	1	-	1	0
S68 Average	1	0	0.333333	1	1	0.666667	0.666667	1	1	1	1	1	0.666667	1	0.333333	1	1	0.666667	1	1	1	0	1	1	1	1	1	1	1	1	1	0	0	0	1	1	1	1	0.333333	#DIV/0!	0	0.666667	0.333333	0.666667	0.333333	1	#DIV/0!	1	0.333333
S69	1	1	1	1	1	1	1	1	0	0	1	1	0	1	0	1	1	1	0	1	1	1	0	1	0	1	1	0	1	1	1	0	1	1	1	1	0	1	1	-	0	0	0	0	0	1	1	0	0
S69	1	1	1	0	1	0	1	1	0	0	1	1	1	1	1	1	1	1	0	1	1	1	1	1	0	1	1	0	1	1	1	1	1	1	1	1	1	0	1	0	0	1	1	0	1	1	1	0	0
S69	1	0	0	0	0	0	1	1	1	0	0	1	1	0	1	1	0	0	1	1	1	0	1	1	1	1	0	0	1	0	1	1	0	0	0	1	1	0	1	1	0	1	0	1	0	0	0	1	0
S69	0	0	1	0	1	0	0	0	0	0	0	0	1	1	1	1	1	0	1	1	1	1	0	0	0	1	0	1	1	0	1	0	1	1	1	1	0	1	1	1	0	1	1	1	1	1	0	0	1
S69	1	1	0	1	1	0	1	0	1	1	1	1	1	0	0	1	0	1	1	1	1	1	1	1	1	1	1	1	1	1	1	0	1	1	0	1	1	1	0	0	0	1	1	1	0	1	1	0	1
S69 Average	0.8	0.6	0.6	0.4	0.8	0.2	0.8	0.6	0.4	0.2	0.6	0.8	0.8	0.6	0.6	1	0.6	0.6	0.6	1	1	0.8	0.6	0.8	0.4	1	0.6	0.4	1	0.6	1	0.4	0.8	0.8	0.6	1	0.6	0.6	0.8	0.5	0	0.8	0.6	0.6	0.4	0.8	0.6	0.2	0.4
S70	0	1	0	1	1	1	1	1	0	0	1	0	0	0	1	1	1	1	1	1	1	0	0	1	1	0	1	1	1	0	0	1	0	1	0	0	0	0	0	0	0	1	1	1	1	1	1	1	1
S70	0	1	0	1	1	1	1	1	0	0	1	0	0	0	1	1	1	1	1	1	1	0	0	1	1	0	1	1	1	0	0	1	0	1	0	0	0	0	0	0	0	1	1	1	1	1	1	1	1
S70	0	1	0	1	1	1	1	1	0	0	1	0	0	0	1	1	0	0	1	1	1	0	0	1	1	0	1	1	1	0	0	1	0	1	0	0	0	0	0	0	0	1	1	1	1	1	1	0	1
S70	0	1	0	1	1	1	1	1	0	0	1	0	0	0	1	1	0	0	1	1	1	0	0	1	1	0	1	1	1	0	0	1	0	1	0	0	0	0	0	0	0	1	1	1	1	1	1	0	1
S70	0	1	0	1	1	-	1	0	0	0	1	-	0	-	0	1	0	0	1	1	1	0	0	1	1	0	1	1	1	-	0	0	0	1	0	0	0	0	0	0	-	0	1	1	1	1	0	0	1
S70	0	1	0	1	1	1	1	1	0	0	1	-	0	0	0	1	1	1	1	1	1	0	0	1	1	0	1	1	1	0	0	1	0	1	0	0	0	0	0	0	0	1	1	1	1	1	1	0	1
S70	0	1	0	1	1	1	1	1	0	0	1	-	0	0	0	1	1	1	1	1	1	0	0	1	1	0	1	1	1	0	0	1	0	1	0	0	0	0	0	0	0	1	1	1	1	1	1	0	1
S70	0	1	0	1	0	0	1	-	-	0	1	0	0	0	0	1	1	-	1	0	1	0	0	0	1	0	1	1	1	0	0	0	0	0	0	0	0	0	0	-	-	1	1	0	0	1	0	0	1
S70	0	1	0	1	1	1	1	1	0	0	1	0	0	0	0	1	1	1	1	1	1	0	0	1	1	0	1	1	1	0	0	1	0	1	0	0	0	0	0	1	0	1	1	1	1	1	1	1	1
S70	0	1	0	1	1	1	1	1	0	0	1	0	0	0	0	1	1	1	1	1	1	0	0	1	1	0	1	1	1	0	0	1	0	1	0	0	0	0	0	1	0	1	1	1	1	1	1	1	1
S70	0	1	-	1	1	-	0	1	0	0	1	0	0	0	0	1	1	0	1	1	1	0	0	1	1	0	1	1	1	0	0	-	0	1	0	0	0	0	0	-	0	1	1	0	1	0	1	1	1
S70	0	1	-	1	1	-	0	1	0	0	1	0	0	0	0	1	1	0	1	1	1	0	0	1	1	0	1	1	1	0	0	-	0	1	0	0	0	0	0	-	0	1	1	0	1	0	1	1	1
S70 Average	0	1	0	1	0.916667	0.888889	0.833333	0.909091	0	0	1	0	0	0	0.333333	1	0.75	0.545455	1	0.916667	1	0	0	0.916667	1	0	1	1	1	0	0	0.8	0	0.916667	0	0	0	0	0	0.222222	0	0.916667	1	0.75	0.916667	0.833333	0.833333	0.5	1
S71	1	0	0	0	0	0	1	0	0	1	1	0	1	0	1	0	0	1	0	0	1	1	0	1	0	0	0	0	0	0	0	0	1	1	0	1	0	1	0	0	0	0	1	1	0	1	1	1	1
S71	0	0	1	1	0	0	0	0	0	0	1	1	1	0	0	0	0	0	0	1	0	0	0	0	0	1	1	0	1	0	0	1	0	0	1	0	0	1	1	0	0	0	0	1	0	1	-	0	0
S71	0	0	0	1	0	1	0	1	0	0	1	1	1	0	0	0	0	0	0	1	0	0	1	0	0	1	1	0	1	0	1	0	0	0	1	0	0	1	1	0	0	0	0	1	0	1	1	0	0
S71	0	0	0	1	0	1	0	1	0	0	1	1	1	0	0	0	0	0	0	1	0	0	1	0	0	1	1	0	1	0	1	0	0	0	1	0	0	1	1	0	0	0	0	1	0	1	1	0	0
S71	0	0	1	1	0	1	0	1	0	0	1	1	1	0	1	0	0	0	0	1	0	0	1	0	0	1	1	0	1	0	1	0	0	0	1	0	0	1	1	0	0	0	0	1	0	1	1	0	0
S71	0	0	1	1	0	1	0	1	0	0	1	1	1	0	1	0	0	0	0	1	0	0	1	0	0	1	1	0	1	0	1	0	0	0	1	0	0	1	1	0	0	0	0	1	0	1	1	0	0
S71	0	0	1	1	0	1	0	1	0	0	1	1	1	0	1	0	0	0	0	1	0	0	1	0	0	1	1	0	1	0	1	0	0	0	1	0	0	1	1	0	0	0	0	1	0	1	0	0	0
S71	0	0	1	1	0	1	0	1	0	0	1	1	1	0	1	0	0	0	0	1	0	0	1	0	0	1	1	0	1	0	1	1	0	0	1	0	0	1	1	-	0	0	0	1	0	1	1	0	0
S71	0	0	1	1	0	1	0	1	0	0	1	1	1	0	1	0	0	0	0	1	0	0	1	0	0	1	1	0	1	0	1	1	0	0	1	0	0	1	1	-	0	0	0	1	0	1	1	0	0
S71	0	0	1	1	0	1	0	1	0	0	1	1	1	0	1	0	0	0	0	1	0	0	1	0	0	1	1	0	1	0	1	1	0	0	1	0	0	1	1	0	0	0	0	1	0	1	1	0	0
S71	0	0	1	1	0	0	0	1	0	0	1	0	1	0	0	0	0	0	0	0	0	0	1	0	0	1	1	0	1	0	1	-	0	0	1	0	0	1	0	-	0	0	0	1	0	1	-	0	0
S71	0	0	1	1	0	1	0	1	0	0	1	1	1	0	0	0	0	0	0	1	0	0	1	0	0	1	1	0	1	0	1	0	0	0	1	0	0	1	1	0	0	0	0	1	0	1	1	0	0
S71	0	0	1	1	0	1	0	1	0	0	1	1	1	0	0	0	0	0	0	1	0	0	1	0	0	1	1	0	1	0	1	0	0	0	1	0	0	1	1	0	0	0	0	1	0	1	1	0	0
S71	0	0	1	1	0	1	0	1	0	0	1	1	1	0	1	0	0	0	0	1	0	0	1	0	0	1	1	0	1	0	1	1	0	0	1	0	0	1	1	-	0	0	0	1	0	1	0	0	0
S71	0	0	1	1	0	1	0	1	0	0	1	1	1	0	1	0	0	0	0	1	0	0	1	0	0	1	1	0	1	0	1	1	0	0	1	0	0	1	1	-	0	0	0	1	0	1	0	0	0
S71	0	0	1	1	0	1	0	1	0	0	1	0	1	0	1	0	0	0	0	1	0	0	1	0	0	1	1	0	1	0	1	1	0	0	1	0	0	1	1	-	0	0	0	1	0	1	0	0	0
S71	0	0	1	1	0	1	0	1	0	0	1	0	1	0	1	0	0	0	0	1	0	0	1	0	0	1	1	0	1	0	1	1	0	0	1	0	0	1	1	-	0	0	0	1	0	1	0	0	0
S71	0	0	1	1	0	1	0	1	0	0	1	1	1	0	1	0	0	0	0	1	0	0	1	0	0	1	1	0	1	0	1	-	0	0	1	0	0	1	1	0	0	0	0	1	0	1	1	0	0
S71	0	0	1	1	0	1	0	0	0	0	1	1	1	0	0	0	0	0	0	1	0	0	1	0	0	1	1	0	1	0	1	0	0	0	1	0	0	1	0	-	-	0	0	1	0	1	-	0	0
S71	0	0	1	1	0	1	0	0	0	0	1	1	1	0	0	0	0	0	0	0	0	0	1	0	0	1	1	0	0	0	1	0	0	0	1	0	0	0	0	-	-	0	0	0	0	1	-	0	0
S71	0	0	1	1	0	1	0	1	0	0	1	0	1	0	0	0	0	0	0	1	0	0	1	0	0	1	1	0	1	0	1	1	0	0	1	0	0	0	1	0	-	0	0	1	0	1	0	0	0
S71	0	0	1	1	0	1	0	1	0	0	1	0	1	0	0	0	0	0	0	1	0	0	1	0	0	1	1	0	1	0	1	1	0	0	1	0	0	0	1	0	-	0	0	1	0	1	0	0	0
S71	0	0	1	1	0	1	0	0	0	0	1	0	1	0	1	0	0	0	0	1	0	0	1	0	0	0	1	0	1	0	1	0	0	0	1	0	0	1	1	-	0	0	0	1	0	1	1	0	0
S71	0	0	1	1	0	1	0	1	0	0	0	0	1	0	1	0	0	0	0	1	0	0	1	0	0	1	1	0	1	0	1	-	0	0	1	0	0	1	1	0	0	0	0	1	0	1	-	0	0
S71	0	0	1	1	0	1	0	1	0	0	0	0	1	0	1	0	0	0	0	1	0	0	1	0	0	1	1	0	1	0	1	-	0	0	1	0	0	1	1	0	0	0	0	1	0	1	-	0	0
S71	0	0	1	1	0	0	0	1	0	0	1	1	1	0	0	0	0	0	0	1	0	0	1	0	0	1	1	0	1	0	1	1	0	0	1	0	0	1	1	0	0	0	0	1	0	1	0	0	0
S71	0	0	1	1	0	0	0	1	0	0	1	1	1	0	0	0	0	0	0	1	0	0	1	0	0	1	1	0	1	0	1	1	0	0	1	0	0	1	1	0	0	0	0	1	0	1	0	0	0
S71	0	0	1	1	0	0	0	1	0	0	1	1	1	0	0	0	0	0	0	1	0	0	1	0	0	1	1	0	1	0	1	1	0	0	1	0	0	1	1	0	0	0	0	1	0	1	0	0	0
S71	0	0	1	1	0	0	0	1	0	0	1	1	1	0	0	0	0	0	0	1	0	0	1	0	0	1	1	0	1	0	1	1	0	0	1	0	0	1	1	0	0	0	0	1	0	1	0	0	0
S71	0	0	0	1	0	1	0	1	0	0	1	0	1	0	0	0	0	0	0	1	0	0	1	0	0	1	1	0	1	0	1	1	0	0	1	0	0	1	1	-	0	0	0	1	0	1	-	0	0
S71	0	0	0	1	0	1	0	1	0	0	1	0	1	0	0	0	0	0	0	1	0	0	1	0	0	1	1	0	1	0	1	1	0	0	1	0	0	1	1	-	0	0	0	1	0	1	-	0	0
S71	0	0	1	1	0	1	0	1	0	0	1	1	1	0	1	0	0	0	0	1	0	0	1	0	0	1	1	0	1	0	1	1	0	0	1	0	0	1	1	0	0	0	0	1	0	1	1	0	0
S71 Average	0.03125	0	0.84375	0.96875	0	0.78125	0.03125	0.84375	0	0.03125	0.9375	0.65625	1	0	0.5	0	0	0.03125	0	0.90625	0.03125	0.03125	0.9375	0.03125	0	0.9375	0.96875	0	0.9375	0	0.9375	0.607143	0.03125	0.03125	0.96875	0.03125	0	0.90625	0.875	0	0	0	0.03125	0.96875	0	1	0.541667	0.03125	0.03125
S72	1	0	0	0	1	-	0	1	1	-	0	0	1	1	0	0	-	0	0	0	1	0	0	0	0	0	0	0	1	0	0	1	1	1	0	0	0	1	0	-	0	0	1	1	1	0	1	1	1
S72	1	0	0	0	1	-	0	1	1	-	0	0	1	1	0	0	-	0	0	0	1	0	0	0	0	0	0	0	1	0	0	1	1	1	0	0	0	1	0	-	0	0	1	1	1	0	1	1	1
S72	1	0	1	0	1	0	0	1	1	1	0	1	1	1	0	0	0	0	0	0	1	1	1	0	1	0	0	0	1	0	0	0	1	1	0	0	0	1	0	0	0	0	1	1	1	0	1	1	1
S72	1	0	1	0	1	0	0	0	1	0	0	1	1	1	0	0	0	0	0	0	1	1	1	0	1	0	0	0	1	1	0	0	1	0	0	0	0	1	0	0	1	0	1	1	1	0	-	1	1
S72	1	0	1	0	1	0	0	0	1	0	0	1	1	1	0	0	0	0	0	0	1	1	1	0	1	0	0	0	1	1	0	0	1	0	0	0	0	1	0	0	1	0	1	1	1	0	-	1	1
S72	1	0	1	0	1	0	0	1	1	1	0	1	1	1	0	0	0	0	0	0	1	1	1	0	1	0	0	0	1	1	0	1	1	1	0	0	0	1	0	0	0	0	1	1	1	0	1	1	0
S72	1	0	1	0	1	0	0	1	1	1	0	1	1	1	0	0	0	0	0	0	1	1	1	0	1	0	0	0	1	1	0	1	1	1	0	0	0	1	0	0	0	0	1	1	1	0	1	1	0
S72	1	0	1	0	1	0	0	1	1	1	0	1	1	1	0	0	0	0	0	0	1	1	1	0	1	0	0	0	1	1	0	1	1	1	0	0	0	1	0	0	0	0	1	1	1	0	1	1	0
S72	1	0	1	0	1	0	0	1	1	1	0	1	1	1	0	0	0	0	0	0	1	1	1	0	1	0	0	0	1	1	0	1	1	1	0	0	0	1	0	0	0	0	1	1	1	0	1	1	0
S72	1	0	1	0	1	-	0	0	1	1	0	1	1	0	0	0	0	0	0	0	1	1	1	0	1	0	0	0	1	-	0	0	1	0	0	0	0	1	0	-	0	0	1	1	1	0	0	0	1
S72	1	0	1	0	1	-	0	0	1	1	0	1	1	0	0	0	0	0	0	0	1	1	1	0	1	0	0	0	1	-	0	0	1	0	0	0	0	1	0	-	0	0	1	1	1	0	0	0	1
S72	1	0	1	0	1	0	0	1	1	1	0	1	1	0	0	0	0	0	0	0	1	1	1	0	1	0	0	0	0	0	0	0	1	0	0	0	0	1	0	-	0	0	1	1	1	0	0	0	1
S72	1	0	1	0	1	0	0	1	1	1	0	0	1	1	0	0	0	0	0	0	1	1	1	0	0	0	0	0	1	1	0	0	1	1	0	0	0	1	0	1	0	0	1	1	1	0	0	0	1
S72 Average	1	0	0.846154	0	1	0	0	0.692308	1	0.818182	0	0.769231	1	0.769231	0	0	0	0	0	0	1	0.846154	0.846154	0	0.769231	0	0	0	0.923077	0.636364	0	0.461538	1	0.615385	0	0	0	1	0	0.125	0.153846	0	1	1	1	0	0.636364	0.692308	0.692308
S73	0	0	1	0	1	0	0	1	1	0	0	0	1	1	0	1	0	0	0	1	0	0	1	0	1	1	1	1	1	1	0	0	0	0	0	0	1	0	1	0	1	1	0	0	1	0	1	0	0
S73	0	0	1	0	1	0	0	1	1	0	0	0	1	1	0	1	0	0	0	1	0	0	1	0	1	0	1	1	1	0	0	0	0	0	0	0	1	0	1	0	1	1	0	0	1	0	1	0	0
S73	0	0	1	0	1	0	0	1	1	0	0	0	1	1	0	1	0	0	0	1	0	0	1	0	1	0	1	1	1	0	0	0	0	0	0	0	1	0	1	0	1	1	0	0	1	0	1	0	0
S73	0	0	1	0	1	0	0	1	1	0	0	0	1	0	0	1	0	0	0	1	0	0	1	0	1	1	1	1	1	1	0	0	0	0	0	0	1	0	1	1	0	1	0	0	1	0	0	0	0
S73	0	0	1	0	1	0	0	1	1	0	0	0	1	1	0	1	0	0	0	1	0	0	1	0	1	1	1	1	1	1	0	0	0	0	0	0	1	0	1	1	1	1	0	0	1	0	1	0	0
S73	0	0	1	0	1	0	0	1	1	0	0	0	1	1	0	1	0	0	0	1	0	0	1	0	1	1	1	1	1	1	0	0	0	0	0	0	1	0	1	1	1	1	0	0	1	0	1	0	0
S73 Average	0	0	1	0	1	0	0	1	1	0	0	0	1	0.833333	0	1	0	0	0	1	0	0	1	0	1	0.666667	1	1	1	0.666667	0	0	0	0	0	0	1	0	1	0.5	0.833333	1	0	0	1	0	0.833333	0	0
S74	0	0	1	1	0	1	0	0	0	0	0	1	0	1	1	1	1	0	0	0	0	1	0	0	0	1	1	1	0	0	1	1	0	0	0	0	0	0	0	0	0	0	0	0	0	0	1	0	0
S74	0	0	1	1	0	1	0	0	0	0	0	1	0	1	1	1	1	0	0	0	0	1	0	0	0	1	1	1	0	1	1	1	1	0	0	0	0	0	0	1	0	0	0	0	1	1	1	0	0
S74	0	0	1	1	0	1	0	0	0	0	0	1	0	1	1	1	1	0	0	0	0	1	0	0	0	1	1	1	0	1	1	1	1	0	0	0	0	0	0	1	0	0	0	0	1	1	1	0	0
S74	0	0	1	1	0	1	0	0	0	0	0	1	0	1	1	1	1	0	0	0	0	1	0	0	0	1	1	1	0	1	1	1	1	0	0	0	0	0	0	1	0	0	0	0	1	1	1	0	0
S74	0	0	1	1	0	1	0	0	0	0	0	1	0	1	1	1	1	0	0	0	0	1	0	0	0	1	1	1	0	1	1	1	1	0	0	0	0	0	0	1	0	0	0	0	1	1	1	0	0
S74	0	0	1	1	0	1	0	0	0	0	0	1	0	1	1	1	1	0	0	0	0	1	0	0	0	1	1	1	0	1	1	1	1	0	0	0	0	0	0	1	0	0	0	0	1	1	1	0	0
S74	0	0	1	1	0	1	0	0	0	0	0	1	0	1	1	1	1	0	0	0	0	1	0	0	0	1	1	1	0	1	1	1	1	0	0	0	0	0	0	0	0	0	0	0	1	1	1	0	0
S74	0	0	1	1	0	1	0	0	0	0	0	1	0	1	1	1	1	0	0	0	0	1	0	0	0	1	1	1	0	1	1	0	1	0	0	0	0	0	0	-	0	0	0	0	1	1	1	0	0
S74	0	0	1	1	0	1	0	0	0	0	0	1	0	1	1	1	0	0	0	0	0	1	0	0	0	1	1	1	0	0	1	1	0	0	0	0	0	0	0	0	0	1	0	0	0	0	1	0	0
S74 Average	0	0	1	1	0	1	0	0	0	0	0	1	0	1	1	1	0.888889	0	0	0	0	1	0	0	0	1	1	1	0	0.777778	1	0.888889	0.777778	0	0	0	0	0	0	0.625	0	0.111111	0	0	0.777778	0.777778	1	0	0
S75	0	0	1	1	0	1	0	0	0	0	0	1	0	1	0	1	0	0	0	1	1	1	0	0	0	1	0	1	0	1	1	1	1	0	0	0	0	1	0	0	0	1	0	0	1	1	1	1	0
S75	0	0	1	1	0	1	0	0	0	0	1	0	0	1	0	1	1	0	0	1	1	1	0	0	0	1	1	1	0	1	1	1	1	0	0	0	0	1	0	0	0	1	0	0	1	1	-	1	0
S75	0	0	1	1	0	0	0	0	0	0	1	1	0	1	0	1	1	0	-	1	1	1	0	0	0	1	1	1	0	1	1	1	1	1	0	0	0	1	0	-	0	1	0	0	1	1	1	1	0
S75	0	0	1	1	0	0	0	0	0	-	1	1	0	-	0	1	1	0	-	1	1	1	0	0	0	1	1	1	0	1	1	1	1	1	0	0	0	1	0	-	0	1	0	0	1	1	1	1	0
S75	0	0	1	1	0	0	0	0	0	-	1	1	0	1	-	1	1	-	-	1	1	1	0	0	0	1	1	1	-	1	1	1	1	1	0	0	0	1	0	-	0	1	-	0	1	1	1	1	0
S75	0	0	1	1	0	0	0	0	0	0	1	1	0	1	0	1	1	0	0	1	1	1	0	0	0	1	1	1	0	1	1	1	1	1	0	0	0	1	0	-	0	1	0	0	1	1	1	1	0
S75	0	0	1	1	0	1	0	0	0	0	1	1	0	1	0	1	1	0	0	1	1	1	0	0	0	1	1	1	0	1	1	1	1	0	0	0	0	1	0	-	0	1	0	0	1	1	0	1	0
S75	0	0	1	1	0	1	0	0	0	0	1	1	0	1	0	1	1	0	0	1	1	1	0	0	0	1	1	1	0	1	1	1	1	0	0	0	0	1	0	-	0	1	0	0	1	1	0	1	0
S75	0	0	1	1	0	1	0	0	0	0	1	1	0	1	0	1	1	0	0	1	1	1	0	0	0	1	1	1	0	1	1	1	1	0	0	0	0	1	0	-	0	1	0	0	1	1	0	1	0
S75	0	0	1	1	0	1	0	0	0	0	1	1	0	1	0	1	1	0	0	1	1	1	0	0	0	1	1	1	0	1	1	1	1	0	0	0	0	1	0	-	0	1	0	0	1	1	0	1	0
S75	0	0	1	1	0	1	0	0	0	0	1	1	0	1	0	1	1	0	0	1	1	1	0	0	0	1	1	1	0	1	1	0	1	0	0	0	0	1	0	0	0	1	0	0	1	1	-	1	0
S75	0	0	1	1	0	1	0	0	0	0	1	1	0	1	0	1	1	0	0	1	1	1	0	0	0	1	1	1	0	0	1	-	1	0	0	0	0	1	0	-	-	1	0	0	1	1	1	1	0
S75	0	0	1	1	0	0	0	0	0	0	1	1	0	1	0	1	1	0	0	1	1	1	0	0	0	1	1	1	0	1	1	1	0	0	0	0	0	1	0	0	0	1	0	0	0	0	1	0	0
S75	0	0	1	1	0	0	0	0	0	0	1	1	0	0	0	1	1	0	0	1	1	1	0	0	0	0	1	1	0	0	1	1	1	0	0	0	0	1	0	-	0	1	0	0	1	1	0	1	0
S75	0	0	1	1	0	1	0	0	0	0	1	1	0	1	0	1	1	0	0	1	1	1	0	0	0	1	1	1	0	1	1	-	1	0	0	0	0	1	0	-	0	1	0	0	1	1	0	1	0
S75	0	0	1	1	0	1	0	0	0	0	1	1	0	1	0	1	1	0	0	1	1	1	0	0	0	1	1	1	0	1	1	-	1	0	0	0	0	1	0	-	0	1	0	0	1	1	0	1	0
S75	0	0	1	1	0	1	0	0	0	0	1	0	0	1	0	1	1	0	0	1	1	1	0	0	0	1	1	1	0	1	1	1	1	0	0	0	0	1	0	-	0	1	0	0	1	1	1	1	0
S75	0	0	1	1	0	1	0	0	0	0	1	1	0	1	0	1	1	0	0	1	1	1	0	0	0	1	1	1	0	1	1	1	1	0	0	0	0	1	0	1	0	1	0	0	1	1	1	1	0
S75	0	0	1	1	0	1	0	0	0	0	1	1	0	1	0	1	1	0	0	1	1	1	0	0	0	1	1	1	0	1	1	0	1	0	0	0	0	1	0	1	0	0	0	0	1	1	1	1	0
S75 Average	0	0	1	1	0	0.684211	0	0	0	0	0.947368	0.894737	0	0.944444	0	1	0.947368	0	0	1	1	1	0	0	0	0.947368	0.947368	1	0	0.894737	1	0.875	0.947368	0.210526	0	0	0	1	0	0.333333	0	0.947368	0	0	0.947368	0.947368	0.588235	0.947368	0
S77	0	0	1	0	1	1	0	1	0	1	0	0	1	1	1	1	0	0	0	0	1	1	0	0	0	0	0	0	0	1	0	0	0	1	0	0	0	1	0	-	0	0	0	0	0	0	0	0	1
S77	0	0	1	0	1	1	0	1	0	1	0	1	1	1	0	1	1	0	0	0	1	1	0	0	1	0	0	0	1	1	0	0	0	1	0	0	0	1	0	0	0	0	0	0	0	0	0	0	1
S77	0	0	1	0	1	1	0	1	0	1	0	1	1	1	0	1	1	0	0	0	1	1	0	0	1	0	0	0	1	1	0	0	0	1	0	0	0	1	0	0	0	0	0	0	0	0	0	0	1
S77	0	0	1	0	1	1	0	1	0	1	0	1	1	1	0	1	1	0	0	0	1	1	0	0	1	0	0	0	1	1	0	0	0	1	0	0	0	1	0	0	0	0	0	0	0	0	0	0	1
S77	0	0	0	0	1	1	0	1	0	1	0	1	1	1	1	1	1	0	0	0	1	1	0	0	1	0	0	0	1	1	0	0	0	0	0	0	0	1	0	-	-	0	0	0	0	0	0	0	1
S77	0	0	0	0	1	1	0	1	0	1	0	1	1	1	1	1	1	0	0	0	1	1	0	0	1	0	0	0	1	1	0	0	0	0	0	0	0	1	0	-	-	0	0	0	0	0	0	0	1
S77	0	0	1	0	1	1	0	1	0	1	0	1	1	1	1	1	1	0	0	0	1	1	0	0	1	0	0	0	1	1	0	0	0	1	0	0	0	1	0	1	0	0	0	0	0	0	0	0	1
S77	0	0	0	0	1	1	0	1	0	1	0	1	1	1	1	1	1	0	0	0	1	1	0	0	1	0	0	0	1	1	0	0	0	0	0	0	0	1	0	-	0	0	0	0	0	0	0	0	1
S77	0	0	1	0	1	1	0	0	0	1	0	1	1	1	1	1	1	0	0	0	1	1	0	0	1	0	0	0	1	0	0	0	0	0	0	0	0	1	0	0	0	0	0	0	0	0	0	0	1
S77	0	0	1	0	1	1	0	1	0	1	0	1	1	1	1	1	1	0	0	0	1	1	0	0	1	0	0	0	1	1	0	0	0	1	0	0	0	1	0	1	0	0	0	0	0	0	0	0	1
S77	0	0	1	0	1	1	0	1	0	1	0	1	1	1	1	1	1	0	0	0	1	1	0	0	1	0	0	0	1	1	0	0	0	1	0	0	0	1	0	1	0	0	0	0	0	0	0	0	1
S77	0	0	1	0	1	1	0	1	0	1	0	1	1	1	1	1	1	0	0	0	1	1	0	0	1	0	0	0	1	1	0	0	0	1	0	0	0	1	0	1	0	0	0	0	0	0	0	0	1
S77	0	0	1	0	1	1	0	1	0	1	0	1	1	1	1	1	1	0	0	0	1	1	0	0	1	0	0	0	1	1	0	0	0	1	0	0	0	1	0	1	0	0	0	0	0	0	0	0	1
S77	0	0	1	0	1	1	0	1	0	1	0	1	1	1	1	1	1	0	0	0	1	1	0	0	1	0	0	0	1	1	0	0	0	1	0	0	0	1	0	1	0	0	0	0	0	0	0	0	1
S77	0	0	1	0	1	1	0	1	0	1	0	1	1	1	1	1	1	0	0	0	1	1	0	0	1	0	0	0	1	1	0	0	0	1	0	0	0	1	0	1	0	0	0	0	0	0	0	0	1
S77	0	0	1	0	1	1	0	1	0	1	0	1	1	1	0	1	1	0	0	0	1	1	0	0	1	0	0	0	0	1	0	0	0	1	0	0	0	1	0	0	0	0	0	0	0	0	0	0	1
S77	0	0	1	0	1	1	0	1	0	1	0	1	1	1	0	1	1	0	0	0	1	1	0	0	1	0	0	0	0	1	0	0	0	1	0	0	0	1	0	0	0	0	0	0	0	0	0	0	1
S77	0	0	1	0	1	1	0	1	0	1	0	1	1	1	0	1	1	0	0	0	1	1	0	0	1	0	0	0	0	1	0	0	0	1	0	0	0	1	0	0	0	0	0	0	0	0	0	0	1
S77	0	0	1	0	1	1	0	1	0	1	0	1	1	1	0	1	1	0	0	0	1	1	0	0	1	0	0	0	1	1	0	0	0	0	0	0	0	1	0	1	0	0	0	0	0	0	0	0	1
S77	0	0	1	0	1	1	0	1	0	1	0	1	1	1	1	1	1	0	0	0	1	1	0	0	1	0	0	0	1	1	0	0	0	1	0	0	0	1	0	1	0	0	0	0	0	0	0	0	1
S77	0	0	1	0	1	1	0	1	0	1	0	1	1	1	1	1	1	0	0	0	1	1	0	0	1	0	0	0	1	1	0	0	0	1	0	0	0	1	0	1	0	0	0	0	0	0	0	0	1
S77	0	0	1	0	1	1	0	1	0	1	0	1	1	1	0	1	1	0	0	0	1	1	0	0	1	0	0	0	1	1	0	0	0	1	0	0	0	1	0	0	0	0	0	0	0	0	0	0	1
S77	0	0	1	0	1	1	0	1	0	1	0	1	1	1	0	1	1	0	0	0	1	1	0	0	1	0	0	0	1	1	0	0	0	1	0	0	0	1	0	0	0	0	0	0	0	0	0	0	1
S77	0	0	1	0	1	1	0	1	0	1	0	1	1	1	1	1	1	0	0	0	1	1	0	0	1	0	0	0	1	1	0	0	0	1	0	0	0	1	0	1	0	0	0	0	0	0	0	0	1
S77	0	0	1	0	1	1	0	1	0	1	0	1	1	1	1	1	1	0	0	0	1	1	0	0	1	0	0	0	1	1	0	0	0	1	0	0	0	1	0	1	0	0	0	0	0	0	0	0	1
S77	0	0	1	0	1	1	0	1	0	1	0	1	1	1	1	1	1	0	0	0	1	1	0	0	1	0	0	0	1	1	0	0	0	1	0	0	0	1	0	1	0	0	0	0	0	0	0	0	1
S77	0	0	1	0	1	0	0	1	0	1	0	1	1	1	0	1	1	0	0	0	1	1	0	0	1	0	0	0	1	1	0	0	0	1	0	0	0	1	0	-	1	0	0	0	0	0	0	0	1
S77	0	0	1	0	1	0	0	1	0	1	0	1	1	1	0	1	1	0	0	0	1	1	0	0	1	0	0	0	1	1	0	0	0	1	0	0	0	1	0	-	0	0	0	0	0	0	0	0	1
S77	0	0	1	0	1	1	0	1	0	1	0	1	1	1	0	1	1	0	0	0	1	1	0	0	1	0	0	0	1	1	0	0	0	1	0	0	0	1	0	-	0	0	0	0	0	0	0	0	1
S77 Average	0	0	0.896552	0	1	0.931034	0	0.965517	0	1	0	0.965517	1	1	0.586207	1	0.965517	0	0	0	1	1	0	0	0.965517	0	0	0	0.862069	0.965517	0	0	0	0.827586	0	0	0	1	0	0.590909	0.037037	0	0	0	0	0	0	0	1
S79	1	1	0	0	1	0	1	0	1	1	1	1	0	0	0	1	0	0	0	1	1	0	1	0	1	1	1	1	1	1	1	1	1	0	1	1	0	1	0	0	0	0	0	1	0	0	1	0	1
S79	1	1	0	0	1	0	1	0	1	1	1	1	0	0	0	1	0	0	0	1	1	0	1	0	1	1	1	1	1	1	1	1	1	0	1	1	0	1	0	0	0	0	0	1	0	0	1	0	1
S79	1	1	0	0	1	0	1	0	1	1	1	1	0	0	0	1	0	0	0	1	1	0	1	0	1	1	1	1	1	1	1	1	1	0	1	1	0	1	0	0	0	0	0	1	0	0	1	0	1
S79	1	1	0	0	1	-	1	0	1	1	1	0	0	0	0	1	0	0	0	1	1	0	0	0	1	1	1	1	1	0	1	-	1	-	1	1	0	1	0	-	-	0	0	1	0	0	0	0	1
S79	1	1	0	0	1	-	1	0	1	1	1	0	0	0	0	1	0	0	0	1	1	0	0	0	1	1	1	1	1	0	1	-	1	-	1	1	0	1	0	-	-	0	0	1	0	0	0	0	1
S79	1	0	0	0	1	0	0	0	1	1	1	-	0	0	0	1	0	0	0	1	1	0	0	0	1	1	1	1	1	0	1	0	1	0	1	0	0	1	0	0	-	0	0	1	0	0	1	0	1
S79	1	0	0	0	1	0	0	0	1	1	1	-	0	0	0	1	0	0	0	1	1	0	0	0	1	1	1	1	1	0	1	0	1	0	1	0	0	1	0	0	-	0	0	1	0	0	1	0	1
S79	1	0	0	0	1	0	0	0	1	1	1	-	0	0	0	1	0	0	0	1	1	0	0	0	1	1	1	1	1	0	1	0	1	0	1	0	0	1	0	0	-	0	0	1	0	0	1	0	1
S79	1	0	0	0	1	0	1	0	1	1	1	1	0	0	0	1	-	0	0	1	1	0	1	0	1	1	1	0	1	1	1	-	1	0	0	1	0	1	0	-	0	0	0	1	0	0	0	0	0
S79	1	0	0	0	1	0	1	0	1	1	1	1	0	0	0	1	-	0	0	1	1	0	1	0	1	1	1	0	1	1	1	-	1	0	0	1	0	1	0	-	0	0	0	1	0	0	0	0	0
S79	1	1	0	0	1	0	1	0	1	1	1	1	0	0	0	1	0	0	0	1	1	0	1	0	1	1	1	1	1	1	1	1	1	0	1	1	0	1	0	0	0	0	0	1	0	0	1	0	1
S79	1	0	0	0	0	0	0	0	1	1	1	1	0	0	-	0	0	0	0	1	0	0	1	0	0	0	1	1	1	1	1	0	1	0	1	1	0	1	0	0	-	-	0	0	0	0	1	0	1
S79	1	1	0	0	0	0	0	0	1	0	1	0	0	0	0	1	0	0	0	1	1	0	1	0	1	1	1	1	1	-	1	0	1	0	1	1	0	0	0	-	-	-	0	1	0	0	0	0	1
S79	1	1	0	0	0	1	0	1	1	1	1	0	1	0	0	1	1	0	1	1	1	1	1	-	1	1	1	0	1	1	1	1	0	1	1	1	0	0	1	-	-	1	1	1	-	0	-	0	1
S79	1	1	0	0	0	1	0	1	1	1	1	0	1	0	0	1	1	0	1	1	1	1	1	-	1	1	1	0	1	1	1	1	0	1	1	1	0	0	1	-	-	1	1	1	-	0	-	0	1
S79	1	1	0	0	0	1	0	1	1	1	1	0	1	0	0	1	1	0	1	1	1	1	1	-	1	1	1	0	1	1	1	1	0	1	1	1	0	0	1	-	-	1	1	1	-	0	-	0	1
S79	1	1	0	0	0	0	1	0	1	1	1	0	0	0	0	1	0	0	0	1	1	0	1	0	0	1	1	1	1	1	1	1	1	0	1	1	0	1	0	-	0	0	0	1	0	0	1	0	1
S79	1	1	0	0	1	0	1	0	1	1	1	1	0	0	0	1	0	0	0	1	1	0	1	0	1	1	1	1	1	1	1	1	1	0	1	1	0	1	0	0	0	0	0	1	0	0	0	0	1
S79 Average	1	0.666667	0	0	0.666667	0.1875	0.555556	0.166667	1	0.944444	1	0.533333	0.166667	0	0	0.944444	0.1875	0	0.166667	1	0.944444	0.166667	0.722222	0	0.888889	0.944444	1	0.722222	1	0.705882	1	0.642857	0.833333	0.1875	0.888889	0.833333	0	0.777778	0.166667	0	0	0.1875	0.166667	0.944444	0	0	0.6	0	0.888889
S80	0	1	0	0	1	1	1	1	1	1	1	0	1	0	1	1	0	1	1	0	1	0	0	1	1	0	1	1	1	0	0	1	1	1	0	0	0	0	0	0	0	1	1	1	1	1	1	1	1
S80	0	1	0	0	1	0	1	1	1	1	1	1	1	0	0	1	1	1	1	0	1	0	0	1	1	0	1	1	0	0	0	1	1	1	0	0	0	0	0	-	0	1	1	1	1	1	1	1	1
S80	0	1	0	0	1	0	1	1	1	1	1	1	1	0	0	1	1	1	1	0	1	0	0	1	1	0	1	1	0	0	0	1	1	1	0	0	0	0	0	-	0	1	1	1	1	1	1	1	1
S80	0	1	0	0	1	1	1	1	1	1	1	0	1	0	1	1	0	1	1	0	1	0	0	1	1	0	1	1	1	0	0	0	0	1	0	0	0	0	0	1	0	1	1	1	1	1	1	1	1
S80	0	1	0	0	0	0	1	1	0	0	1	0	1	0	0	1	0	0	1	0	1	0	0	1	-	0	1	1	0	0	0	0	0	-	0	0	1	0	0	-	-	1	0	1	1	1	-	0	0
S80	0	1	0	0	0	0	1	1	0	0	1	0	1	0	0	1	0	0	1	0	1	0	0	1	-	0	1	1	0	0	0	0	0	-	0	0	1	0	0	-	-	1	0	1	1	1	-	0	0
S80	0	1	0	0	1	-	1	1	1	0	1	0	1	0	0	1	1	1	1	0	1	0	0	0	1	0	1	1	0	0	0	-	0	1	0	0	1	0	0	0	0	0	1	1	0	1	1	1	1
S80	0	1	0	0	1	-	1	1	1	0	1	0	1	0	0	1	1	1	1	0	1	0	0	0	1	0	1	1	0	0	0	-	0	1	0	0	1	0	0	0	0	0	1	1	0	1	1	1	1
S80	0	1	0	0	1	-	1	1	1	0	1	0	1	0	0	1	1	1	1	0	1	0	0	0	1	0	1	1	0	0	0	-	0	1	0	0	1	0	0	0	0	0	1	1	0	1	1	1	1
S80	0	1	0	0	0	0	1	1	0	1	1	0	1	0	0	1	0	0	1	0	1	0	0	1	0	0	1	1	1	0	0	1	1	0	0	0	1	0	0	0	0	1	1	1	1	0	1	1	1
S80	0	1	0	0	0	0	1	1	0	1	1	0	1	0	0	1	0	0	1	0	1	0	0	1	0	0	1	1	1	0	0	1	1	0	0	0	1	0	0	0	0	1	1	1	1	0	1	1	1
S80	0	1	0	0	0	0	1	1	0	1	1	0	1	0	0	1	0	0	1	0	1	0	0	1	0	0	1	1	1	0	0	1	1	0	0	0	1	0	0	0	0	1	1	1	1	0	1	1	1
S80	0	1	0	0	1	1	1	1	1	1	1	0	1	0	0	1	1	-	1	0	1	0	0	1	1	0	1	1	1	0	0	1	1	0	0	0	0	0	0	-	0	1	1	1	1	1	-	1	1
S80	0	1	0	0	1	1	1	1	1	1	1	0	1	0	0	1	1	-	1	0	1	0	0	1	1	0	1	1	1	0	0	1	1	0	0	0	0	0	0	-	0	1	1	1	1	1	-	1	1
S80 Average	0	1	0	0	0.642857	0.363636	1	1	0.642857	0.642857	1	0.142857	1	0	0.142857	1	0.5	0.583333	1	0	1	0	0	0.785714	0.75	0	1	1	0.5	0	0	0.727273	0.571429	0.583333	0	0	0.571429	0	0	0.125	0	0.785714	0.857143	1	0.785714	0.785714	1	0.857143	0.857143
S81	0	0	0	0	1	0	0	1	1	0	0	0	0	1	0	1	0	0	0	1	0	0	1	0	0	1	0	0	1	1	0	0	0	0	1	0	0	0	1	-	-	0	1	0	1	0	0	0	0
S81	0	0	0	0	1	0	0	1	1	0	0	0	0	1	0	1	0	0	0	1	0	0	1	0	0	1	0	0	1	1	0	0	0	0	1	0	0	0	1	-	-	0	1	0	1	0	0	0	0
S81	0	0	0	0	1	0	0	1	1	0	0	0	0	1	0	1	0	0	0	1	0	0	1	0	0	1	0	0	1	1	0	0	0	0	1	0	1	0	1	1	0	0	1	0	1	0	1	0	0
S81	0	0	0	0	1	0	0	1	1	0	0	0	0	1	0	1	0	0	0	1	0	0	1	0	0	1	0	0	1	1	0	0	0	0	1	0	1	0	1	1	0	0	1	0	1	0	1	0	0
S81	0	0	0	0	1	0	0	1	1	0	0	0	0	1	0	1	0	0	0	1	0	0	1	0	0	1	0	0	1	1	0	0	0	0	1	0	1	0	1	1	0	0	1	0	1	0	1	0	0
S81	0	0	0	0	1	0	0	1	1	0	0	0	0	1	0	1	0	0	0	1	0	0	1	0	0	1	0	0	1	1	0	-	0	0	1	0	1	0	1	1	0	0	1	0	1	0	1	0	0
S81	0	0	0	0	1	0	0	1	1	0	0	0	0	1	0	1	0	0	0	1	0	0	1	0	0	1	0	0	1	1	0	-	0	0	1	0	1	0	1	1	0	0	1	0	1	0	1	0	0
S81 Average	0	0	0	0	1	0	0	1	1	0	0	0	0	1	0	1	0	0	0	1	0	0	1	0	0	1	0	0	1	1	0	0	0	0	1	0	0.714286	0	1	1	0	0	1	0	1	0	0.714286	0	0
S82	0	0	0	1	1	1	0	0	0	1	1	1	0	0	1	0	1	0	0	0	1	0	1	0	1	1	0	1	0	0	0	-	1	0	1	1	0	0	0	-	0	0	0	1	0	1	0	0	1
S82	0	0	0	1	1	1	0	0	0	1	1	1	0	0	1	0	1	0	0	0	1	0	1	0	1	1	0	1	0	0	0	-	1	0	1	1	0	0	0	-	0	0	0	1	0	1	0	0	1
S82 Average	0	0	0	1	1	1	0	0	0	1	1	1	0	0	1	0	1	0	0	0	1	0	1	0	1	1	0	1	0	0	0	#DIV/0!	1	0	1	1	0	0	0	#DIV/0!	0	0	0	1	0	1	0	0	1
S83	0	0	1	1	0	1	0	1	0	0	1	0	1	0	1	0	0	0	0	1	0	0	1	0	0	1	1	0	1	0	1	1	0	0	1	0	0	1	1	0	0	0	0	1	0	1	1	0	0
S83	0	0	1	1	0	1	0	1	0	0	1	0	1	0	1	0	0	0	0	1	0	0	1	0	0	1	1	0	1	0	1	1	0	0	1	0	0	1	1	0	0	0	0	1	0	1	1	0	0
S83	0	0	1	1	0	1	0	1	0	0	1	1	1	0	1	0	0	0	0	1	0	0	1	0	0	1	1	0	1	0	1	1	0	0	1	0	0	1	1	0	0	0	0	1	0	1	1	0	0
S83	0	0	1	1	0	1	0	1	0	0	1	1	1	0	1	0	0	0	0	1	0	0	1	0	0	1	1	0	1	0	0	0	0	0	0	0	0	1	1	-	0	0	0	1	0	1	0	0	0
S83	0	0	1	1	0	1	0	1	0	0	1	1	1	0	1	0	0	0	0	1	0	0	1	0	0	1	1	0	1	0	0	0	0	0	0	0	0	1	1	-	0	0	0	1	0	1	0	0	0
S83	0	0	1	1	0	1	0	1	0	0	1	1	1	0	1	0	0	0	0	1	0	0	1	0	0	0	1	0	1	0	1	0	0	0	1	0	0	1	1	0	0	0	0	1	0	0	0	0	0
S83	0	0	1	1	0	0	0	1	0	0	1	1	1	0	0	0	0	0	0	1	0	0	0	0	0	1	1	0	0	0	1	0	0	0	1	0	0	1	1	0	0	0	0	1	0	1	1	0	0
S83	0	0	1	1	0	0	0	1	0	0	1	1	1	0	0	0	0	0	0	1	0	0	0	0	0	1	1	0	0	0	1	0	0	0	1	0	0	1	1	0	0	0	0	1	0	1	1	0	0
S83	0	0	1	1	0	1	0	1	0	0	1	0	1	0	-	0	0	0	0	1	0	0	1	0	0	1	1	0	1	0	1	-	0	0	1	0	0	1	1	0	0	0	0	1	0	1	1	0	0
S83	0	0	1	1	0	1	0	1	0	0	1	1	1	0	1	0	0	0	0	1	0	0	1	0	0	1	1	0	1	0	1	1	0	0	1	0	0	1	1	0	0	0	0	1	0	1	1	0	0
S83	0	0	1	1	0	1	0	1	0	0	1	1	1	0	1	0	0	0	0	1	0	0	1	0	0	1	1	0	1	0	1	1	0	0	1	0	0	1	1	0	0	0	0	1	0	1	1	0	0
S83 Average	0	0	1	1	0	0.818182	0	1	0	0	1	0.727273	1	0	0.8	0	0	0	0	1	0	0	0.818182	0	0	0.909091	1	0	0.818182	0	0.818182	0.5	0	0	0.818182	0	0	1	1	0	0	0	0	1	0	0.909091	0.727273	0	0
S84	0	0	1	1	0	1	1	0	0	0	0	1	0	1	1	1	1	0	0	0	0	1	0	0	0	1	0	1	0	1	1	1	1	0	0	0	0	0	0	0	0	0	0	0	1	1	1	0	0
S84	0	0	1	1	0	1	1	0	0	0	0	1	0	1	1	1	1	0	0	0	0	1	0	0	0	1	0	1	0	1	1	1	1	0	0	0	0	0	0	0	0	0	0	0	1	1	1	0	0
S84	0	0	1	1	0	1	1	0	0	0	0	1	0	1	1	1	1	0	0	0	0	1	0	0	0	1	0	1	0	0	1	1	0	0	0	0	0	0	0	0	0	0	0	0	0	0	1	0	0
S84 Average	0	0	1	1	0	1	1	0	0	0	0	1	0	1	1	1	1	0	0	0	0	1	0	0	0	1	0	1	0	0.666667	1	1	0.666667	0	0	0	0	0	0	0	0	0	0	0	0.666667	0.666667	1	0	0
S85	0	1	1	1	0	1	0	0	1	1	1	0	0	0	0	0	0	1	0	1	0	0	0	1	1	1	1	1	0	0	0	-	1	0	0	0	0	1	0	0	0	-	1	1	1	1	0	1	1
S85	0	0	1	0	0	1	0	1	0	0	0	1	1	0	0	0	0	0	0	1	0	0	1	0	0	1	1	0	1	0	1	1	0	0	1	0	0	1	0	0	0	0	0	1	1	1	1	0	0
S85	0	0	1	0	0	0	0	1	0	0	0	1	1	0	-	0	0	0	0	0	0	0	0	0	0	1	1	0	1	0	1	0	0	-	1	0	0	1	0	0	0	0	0	1	0	1	-	0	0
S85	0	0	1	0	0	0	0	1	0	0	0	1	1	0	-	0	0	0	0	0	0	0	0	0	0	1	1	0	1	0	1	0	0	-	1	0	0	1	0	0	0	0	0	1	0	1	-	0	0
S85	0	0	1	0	0	0	0	1	0	0	0	1	1	0	-	0	0	0	0	0	0	0	0	0	0	1	1	0	1	0	1	0	0	-	1	0	0	1	0	0	0	0	0	1	0	1	-	0	0
S85	0	0	1	0	0	1	0	1	0	0	0	-	1	0	0	0	0	0	0	1	0	0	1	0	0	1	1	0	1	-	1	1	0	0	1	0	0	1	0	-	-	0	0	1	1	1	1	0	0
S85	0	0	1	0	0	1	0	1	0	0	0	1	1	0	0	0	0	0	0	1	0	0	1	0	0	1	1	0	1	0	1	1	0	0	1	0	0	1	0	0	0	0	0	1	1	1	0	0	0
S85	0	0	1	0	0	1	0	1	0	0	0	1	1	0	0	0	0	0	0	1	0	0	1	0	0	1	1	0	1	0	1	1	0	0	1	0	0	1	0	0	0	0	0	1	1	1	1	0	0
S85	0	0	1	0	0	1	0	1	0	0	0	1	1	0	0	0	0	0	0	1	0	0	1	0	0	1	1	0	1	0	1	1	0	0	1	0	0	1	0	0	0	0	0	1	1	1	1	0	0
S85 Average	0	0.111111	1	0.111111	0	0.666667	0	0.888889	0.111111	0.111111	0.111111	0.875	0.888889	0	0	0	0	0.111111	0	0.666667	0	0	0.555556	0.111111	0.111111	1	1	0.111111	0.888889	0	0.888889	0.625	0.111111	0	0.888889	0	0	1	0	0	0	0	0.111111	1	0.666667	1	0.666667	0.111111	0.111111
S86	0	0	1	1	0	1	1	0	0	1	1	1	1	1	1	1	1	0	0	1	1	1	0	0	1	1	0	0	1	1	0	1	0	1	0	0	0	1	0	1	0	0	0	0	0	0	0	0	1
S86	0	0	1	1	0	1	1	0	0	1	1	-	1	1	1	1	1	0	0	1	1	1	0	0	1	1	0	0	1	1	0	-	0	1	0	0	0	1	0	0	-	0	0	0	0	0	-	0	1
S86	0	0	1	1	0	1	1	0	0	1	1	-	1	1	1	1	1	0	0	1	1	1	0	0	1	1	0	0	1	1	0	-	0	1	0	0	0	0	0	0	-	0	0	0	0	0	-	0	1
S86 Average	0	0	1	1	0	1	1	0	0	1	1	1	1	1	1	1	1	0	0	1	1	1	0	0	1	1	0	0	1	1	0	1	0	1	0	0	0	0.666667	0	0.333333	0	0	0	0	0	0	0	0	1
S87	0	1	0	0	0	0	0	0	1	1	0	1	0	1	1	0	1	1	1	0	1	0	0	1	0	1	0	0	0	0	0	0	1	1	0	0	1	1	0	0	0	1	0	0	1	0	1	0	1
S87	0	1	0	0	0	0	0	0	1	1	0	1	0	1	1	0	1	1	1	0	1	0	0	1	0	1	0	0	0	0	0	0	1	0	0	0	1	1	0	0	0	1	0	0	1	0	1	0	1
S87	0	1	0	0	0	0	0	0	1	1	0	1	0	1	1	0	1	1	1	0	1	0	0	1	0	1	0	0	0	0	0	0	1	1	0	0	1	1	0	0	0	1	0	0	1	0	1	0	1
S87	0	1	0	0	0	0	0	0	1	1	0	1	0	1	1	0	1	1	1	0	1	0	0	1	0	1	0	0	0	0	0	0	1	1	0	0	0	1	0	0	0	1	0	0	1	0	1	0	1
S87	0	1	0	0	0	0	0	0	1	1	0	1	0	1	1	0	1	0	1	0	1	0	0	1	0	1	0	0	0	0	0	0	1	1	0	0	0	1	0	0	0	1	0	0	1	0	1	0	1
S87	1	0	1	1	0	1	1	1	1	1	1	0	1	0	0	1	1	1	1	1	0	1	0	1	1	1	1	1	1	0	1	0	0	0	1	1	0	0	1	-	0	0	1	0	1	1	0	0	1
S87	0	1	0	0	0	0	0	0	1	1	0	1	0	1	1	0	1	1	1	0	1	0	0	1	0	1	0	0	0	0	0	0	1	1	0	0	1	1	0	0	0	1	0	0	1	0	1	0	1
S87 Average	0.142857	0.857143	0.142857	0.142857	0	0.142857	0.142857	0.142857	1	1	0.142857	0.857143	0.142857	0.857143	0.857143	0.142857	1	0.857143	1	0.142857	0.857143	0.142857	0	1	0.142857	1	0.142857	0.142857	0.142857	0	0.142857	0	0.857143	0.714286	0.142857	0.142857	0.571429	0.857143	0.142857	0	0	0.857143	0.142857	0	1	0.142857	0.857143	0	1
S89	1	0	1	0	1	1	1	1	1	0	0	0	1	1	0	0	0	0	0	0	1	1	1	1	1	0	0	0	1	1	0	1	0	1	0	0	0	1	1	1	1	0	1	0	1	0	1	1	1
S89	1	0	1	0	1	1	1	1	1	0	0	0	1	1	0	0	0	0	0	0	1	1	1	1	1	0	0	0	1	1	0	1	0	1	0	0	0	1	1	1	1	0	1	0	1	0	1	1	1
S89	1	0	1	0	1	1	1	1	1	0	0	0	1	1	0	0	0	0	0	0	1	1	1	1	1	0	0	0	1	1	0	1	0	1	0	0	0	1	1	1	0	0	1	0	1	0	1	1	1
S89	1	0	1	0	1	1	1	1	1	0	0	0	1	1	0	0	0	0	0	0	1	1	1	1	1	0	0	0	1	1	0	0	0	1	0	0	0	1	1	0	1	0	1	0	1	0	1	1	1
S89	1	0	1	0	1	1	1	1	1	0	0	0	1	1	0	0	0	0	0	0	1	1	1	1	1	0	0	0	1	1	0	0	0	1	0	0	0	1	1	0	1	0	1	0	1	0	1	1	1
S89	1	0	1	0	1	1	1	1	1	0	0	0	1	1	0	0	0	0	0	0	1	1	1	1	1	0	0	0	1	1	0	1	0	1	0	0	0	1	1	1	1	0	1	0	1	0	1	1	1
S89	1	0	1	0	1	1	1	1	1	0	0	0	1	1	0	0	0	0	0	0	1	1	1	1	1	0	0	0	1	1	0	1	0	1	0	0	0	1	1	1	1	0	1	0	1	0	1	1	1
S89	1	0	1	0	1	0	1	1	1	0	0	0	1	1	0	0	0	0	0	0	1	1	1	1	1	0	0	0	1	1	0	1	0	1	0	0	0	1	1	1	1	0	1	0	1	0	1	1	1
S89	1	0	1	0	1	1	1	0	1	0	0	0	1	1	0	0	0	0	0	0	1	1	1	1	1	0	0	0	1	1	0	1	0	1	0	0	0	1	1	-	0	0	1	0	1	0	1	1	1
S89	1	0	0	0	1	0	1	1	1	0	0	0	1	1	0	0	0	0	0	0	1	1	-	0	1	0	0	0	1	1	0	-	0	0	0	0	0	0	0	0	0	0	1	-	1	0	1	1	1
S89	1	0	0	0	1	0	1	1	1	0	0	0	1	1	0	0	0	0	0	0	1	1	-	0	1	0	0	0	1	1	0	-	0	0	0	0	0	0	0	0	0	0	1	-	1	0	1	1	1
S89	1	0	0	0	1	0	1	1	1	0	0	0	1	1	0	0	0	0	0	0	1	1	-	0	1	0	0	0	1	1	0	-	0	0	0	0	0	0	0	0	0	0	1	-	1	0	1	1	1
S89	1	0	0	0	1	0	1	1	1	0	0	0	1	1	0	0	0	0	0	0	1	1	-	0	1	0	0	0	1	1	0	-	0	0	0	0	0	0	0	0	0	0	1	-	1	0	1	1	1
S89	1	0	1	0	1	1	1	1	0	0	0	0	1	1	0	0	0	0	0	0	1	1	1	1	1	0	0	0	1	1	0	0	0	1	0	0	0	1	1	0	0	0	1	0	1	0	0	0	1
S89	1	0	1	0	1	0	1	1	1	0	0	0	1	1	0	0	0	0	0	0	1	1	1	1	1	0	0	0	1	1	0	0	0	-	0	0	0	1	1	1	-	0	1	0	0	0	1	1	1
S89	1	0	1	0	1	0	1	1	1	0	0	0	1	1	0	0	0	0	0	0	1	1	1	1	1	0	0	0	1	1	0	0	0	-	0	0	0	1	1	1	-	0	1	0	0	0	1	1	1
S89	1	0	1	0	1	0	1	1	1	0	0	-	1	1	0	0	0	0	0	0	1	1	1	1	0	0	0	0	1	0	0	0	0	1	0	0	0	1	0	0	-	0	1	0	1	0	0	1	1
S89	1	0	1	0	1	1	1	1	1	0	0	0	1	1	0	0	0	0	0	0	1	1	1	1	1	0	0	0	1	1	0	1	0	1	0	0	0	1	1	1	1	0	1	0	1	0	1	1	1
S89	1	0	1	0	1	1	1	1	1	0	0	0	1	1	0	0	0	0	0	0	1	1	1	1	1	0	0	0	1	1	0	1	0	1	0	0	0	1	1	1	1	0	1	0	1	0	1	1	1
S89	1	0	1	0	1	1	1	1	1	0	0	0	1	1	0	0	0	0	0	0	1	1	1	1	1	0	0	0	1	1	0	1	0	1	0	0	0	1	1	1	1	0	1	0	1	0	1	1	1
S89	1	0	1	0	0	1	0	1	1	0	0	0	1	0	0	0	0	1	0	0	1	1	1	1	1	0	0	0	1	1	0	0	0	-	0	0	0	1	1	0	0	0	1	0	0	0	1	1	1
S89 Average	1	0	0.809524	0	0.952381	0.619048	0.952381	0.952381	0.952381	0	0	0	1	0.952381	0	0	0	0.047619	0	0	1	1	1	0.809524	0.952381	0	0	0	1	0.952381	0	0.588235	0	0.777778	0	0	0	0.809524	0.761905	0.55	0.555556	0	1	0	0.857143	0	0.904762	0.952381	1
S90	1	1	1	0	1	0	1	0	1	1	0	1	1	0	0	1	1	1	1	1	1	1	1	0	1	0	0	1	1	0	0	0	1	0	1	0	1	0	0	-	-	1	1	1	0	1	0	0	1
S90	0	1	0	1	1	0	1	0	0	0	1	1	1	0	0	0	0	0	0	0	0	0	1	0	0	1	0	0	1	0	1	0	1	0	0	0	0	0	0	-	1	0	1	0	0	1	0	1	0
S90	0	1	0	1	0	0	1	0	0	0	1	1	1	0	0	0	0	0	0	0	0	0	1	0	1	1	0	0	0	0	1	0	1	0	0	0	0	0	0	0	1	0	0	0	0	1	0	1	0
S90	0	1	0	1	1	0	1	0	0	0	1	1	1	0	0	0	0	0	0	0	0	0	1	0	1	1	0	0	1	0	1	1	1	0	0	0	0	0	0	0	-	0	1	0	0	1	0	1	0
S90	0	1	0	1	0	0	1	0	0	0	1	0	1	0	0	0	0	0	0	0	0	0	1	0	1	1	0	0	1	0	1	0	1	0	0	0	0	0	0	0	0	0	1	0	0	1	0	0	0
S90	0	1	0	1	1	0	1	0	0	0	1	1	1	0	0	0	0	0	0	0	0	0	1	0	1	1	0	0	1	0	1	1	1	0	0	0	0	0	0	0	0	0	1	0	0	1	0	1	0
S90	0	1	0	1	1	0	1	0	0	0	1	1	1	0	0	0	0	0	0	0	0	0	1	0	1	1	0	0	1	0	1	1	1	0	0	0	0	0	0	0	1	0	1	0	0	1	0	1	0
S90	0	1	0	1	1	0	1	0	0	0	1	1	1	0	0	0	0	0	0	0	0	0	1	0	1	1	0	0	1	0	1	1	1	0	0	0	0	0	0	0	1	0	1	0	0	1	0	1	0
S90	0	1	0	1	1	0	1	0	0	0	1	-	1	0	0	0	0	0	0	0	0	0	1	0	1	1	0	0	1	0	1	1	1	0	0	0	0	0	0	0	-	0	1	0	0	1	0	1	0
S90	0	1	0	1	-	0	1	0	0	0	1	-	1	0	0	0	0	0	0	0	0	0	1	0	1	1	0	0	-	0	1	1	1	0	0	0	0	0	0	0	-	0	-	0	0	1	0	1	0
S90 Average	0.1	1	0.1	0.9	0.777778	0	1	0	0.1	0.1	0.9	0.875	1	0	0	0.1	0.1	0.1	0.1	0.1	0.1	0.1	1	0	0.9	0.9	0	0.1	0.888889	0	0.9	0.6	1	0	0.1	0	0.1	0	0	0	0.666667	0.1	0.888889	0.1	0	1	0	0.8	0.1
S91	0	0	0	1	0	1	0	0	0	0	1	0	0	0	-	1	0	0	0	1	1	1	0	0	0	1	1	1	0	1	1	1	1	0	0	0	-	1	0	-	-	1	0	0	1	1	0	-	0
S91	0	0	1	1	0	1	0	0	0	0	1	1	0	1	0	1	1	0	0	1	1	1	0	0	0	1	1	1	0	1	1	1	1	0	0	0	0	1	0	1	0	1	0	0	1	1	1	0	0
S91	0	0	1	1	0	1	0	0	0	0	1	1	0	1	0	1	1	0	0	1	1	1	0	0	0	1	1	1	0	1	1	1	1	0	0	0	0	1	0	1	0	1	0	0	1	1	1	0	0
S91	0	0	1	1	0	0	0	0	0	0	1	0	0	1	0	1	0	0	0	1	1	1	0	0	0	1	1	1	0	0	1	1	1	0	0	0	0	1	0	0	0	1	0	0	1	1	1	0	0
S91	0	0	1	1	0	1	0	0	0	0	1	1	0	1	-	1	1	-	0	0	1	1	0	0	0	1	1	1	0	1	1	-	1	0	0	0	-	1	0	0	-	1	0	0	1	1	1	0	0
S91 Average	0	0	0.8	1	0	0.8	0	0	0	0	1	0.6	0	0.8	0	1	0.6	0	0	0.8	1	1	0	0	0	1	1	1	0	0.8	1	1	1	0	0	0	0	1	0	0.5	0	1	0	0	1	1	0.8	0	0
S92	1	0	1	1	1	0	0	0	0	1	1	1	1	0	0	1	0	0	0	1	0	1	0	0	1	0	0	1	1	1	0	0	1	0	0	0	0	1	0	0	0	1	0	1	1	0	0	1	0
S92	1	0	1	1	1	0	0	0	0	1	0	1	1	1	0	0	0	0	0	0	0	1	0	0	1	1	0	1	1	1	0	0	0	0	0	-	0	1	0	0	0	1	0	0	0	0	0	0	0
S92	1	0	0	1	1	0	0	0	0	1	1	1	1	0	0	1	0	0	0	1	0	1	0	0	1	1	0	1	1	1	0	0	1	0	0	0	0	1	0	-	0	0	0	1	1	0	0	1	0
S92	1	0	0	1	1	0	0	0	0	1	1	1	1	0	0	1	0	0	0	1	0	1	0	0	1	1	0	1	1	1	0	0	1	0	0	0	0	1	0	-	0	0	0	1	1	0	0	1	0
S92	1	0	0	1	1	0	0	0	0	1	1	1	1	0	0	1	0	0	0	1	0	1	0	0	1	1	0	1	1	1	0	0	1	0	0	0	0	1	0	-	0	0	0	1	1	0	0	1	0
S92	1	0	1	1	1	0	0	0	0	1	1	1	1	0	0	1	0	0	0	1	0	1	0	0	1	1	0	1	1	1	0	0	1	0	0	0	0	1	0	1	1	1	0	1	1	0	0	1	0
S92	1	0	1	1	1	0	0	0	0	1	1	1	1	0	0	1	0	0	0	1	0	1	0	0	1	1	0	1	1	1	0	1	1	0	0	0	0	1	0	1	1	1	0	1	1	0	0	1	0
S92	1	0	1	1	1	0	0	0	0	1	1	1	1	0	0	1	0	0	0	1	0	1	0	0	1	1	0	1	1	1	0	1	1	0	0	0	0	1	0	1	1	1	0	1	1	0	0	1	0
S92	1	0	1	1	1	0	0	0	0	1	1	1	1	0	0	1	0	0	0	1	0	1	0	0	1	1	0	1	1	1	0	1	1	0	0	0	0	0	0	0	1	1	0	1	1	0	0	1	0
S92	1	0	1	1	1	0	0	0	0	1	1	1	1	0	0	1	0	0	0	1	0	1	0	0	1	1	0	1	1	1	0	0	1	0	0	0	0	1	0	1	1	1	0	1	1	0	0	1	0
S92 Average	1	0	0.7	1	1	0	0	0	0	1	0.9	1	1	0.1	0	0.9	0	0	0	0.9	0	1	0	0	1	0.9	0	1	1	1	0	0.3	0.9	0	0	0	0	0.9	0	0.571429	0.5	0.7	0	0.9	0.9	0	0	0.9	0
S93	0	1	0	0	0	0	0	0	1	1	0	1	0	1	1	0	1	1	1	0	1	0	0	1	0	1	0	0	0	0	0	0	1	1	0	0	1	1	0	0	0	1	0	0	1	0	1	0	1
S93	0	1	0	0	0	0	0	0	1	1	0	1	0	1	1	0	1	1	1	0	1	0	0	1	0	1	0	0	0	0	0	0	1	1	0	0	1	1	0	0	0	1	0	0	1	0	1	0	1
S93	0	1	0	0	0	0	0	0	1	1	0	1	0	1	1	0	1	1	1	0	1	0	0	1	0	1	0	0	0	0	0	0	1	1	0	0	1	1	0	0	0	1	0	0	1	0	1	0	1
S93	0	1	0	0	0	0	0	0	1	1	0	1	0	1	0	0	1	1	1	0	1	0	0	1	0	1	0	0	0	0	0	-	1	1	0	0	1	1	0	0	0	-	0	0	1	0	0	0	1
S93	0	1	0	0	0	0	0	0	1	1	0	1	0	1	0	0	1	1	1	0	1	0	0	1	0	1	0	0	0	0	0	-	1	1	0	0	1	1	0	0	0	-	0	0	1	0	0	0	1
S93	0	1	0	0	0	0	0	0	1	1	0	1	0	1	0	0	1	0	1	0	1	0	0	1	0	1	0	0	0	0	0	0	1	1	0	0	1	1	0	0	0	1	0	0	1	0	1	0	1
S93	0	1	0	0	0	0	0	0	1	1	0	1	0	1	1	0	1	1	1	0	1	0	0	1	0	1	0	0	0	0	0	0	1	1	0	0	1	1	0	0	0	1	0	0	1	0	0	0	0
S93	0	1	0	0	0	0	0	0	1	1	0	1	0	1	1	0	1	1	1	0	1	0	0	1	0	1	0	0	0	0	0	0	1	1	0	0	1	1	0	0	0	1	0	0	1	0	0	0	0
S93	0	1	0	0	0	0	0	0	1	1	0	1	0	1	1	0	1	1	1	0	1	0	0	1	0	1	0	0	0	0	0	0	1	1	0	0	1	1	0	0	0	0	0	0	1	0	0	0	0
S93	0	1	0	0	0	0	0	0	1	1	0	1	0	1	1	0	1	1	1	0	1	0	0	1	0	1	0	0	0	0	0	0	1	1	0	0	1	1	0	-	-	0	0	0	1	0	0	0	1
S93	0	1	0	0	0	0	0	0	1	1	0	1	0	1	1	0	1	1	1	0	1	0	0	1	0	1	0	0	0	0	0	0	1	1	0	0	1	1	0	-	-	0	0	0	1	0	0	0	1
S93 Average	0	1	0	0	0	0	0	0	1	1	0	1	0	1	0.727273	0	1	0.909091	1	0	1	0	0	1	0	1	0	0	0	0	0	0	1	1	0	0	1	1	0	0	0	0.666667	0	0	1	0	0.363636	0	0.727273
S94	1	0	0	0	1	0	0	0	1	1	0	-	1	1	0	0	0	0	0	0	1	1	1	0	1	0	0	0	1	1	0	-	-	0	0	0	0	1	0	-	1	0	1	0	1	0	1	1	1
S94	1	0	0	0	1	0	0	0	1	1	0	-	1	1	0	0	0	0	0	0	1	1	1	0	1	0	0	0	1	1	0	-	-	0	0	0	0	1	0	-	1	0	1	0	1	0	1	1	1
S94	1	0	1	0	1	0	0	1	1	1	0	0	1	1	-	0	0	0	0	0	1	0	1	0	1	0	0	0	1	1	0	1	0	1	0	0	0	1	1	0	0	0	1	0	1	0	0	0	1
S94	1	0	1	0	1	0	0	1	1	1	0	0	1	1	0	0	0	0	0	0	1	1	1	0	1	0	0	0	1	1	0	1	0	0	0	0	0	1	1	0	1	0	1	0	1	0	1	1	1
S94	1	0	1	0	1	0	0	1	1	1	0	0	1	1	0	0	0	0	0	0	1	1	1	0	1	0	0	0	1	1	0	1	0	0	0	0	0	1	1	0	1	0	1	0	1	0	1	1	1
S94	1	0	1	0	1	0	0	1	1	1	0	0	1	1	0	0	0	0	0	0	1	1	1	0	1	0	0	0	1	1	0	1	0	1	0	0	0	1	1	1	1	0	1	0	1	0	1	1	1
S94	1	0	1	0	1	0	0	1	1	1	0	0	1	1	0	0	0	0	0	0	1	1	1	0	1	0	0	0	1	1	0	1	0	1	0	0	0	1	1	1	1	0	1	0	1	0	1	1	1
S94	1	0	1	0	1	0	0	1	1	1	0	0	1	1	0	0	0	0	0	0	1	1	1	0	1	0	0	0	1	1	0	1	0	1	0	0	0	1	1	1	1	0	1	0	1	0	1	1	1
S94	1	0	1	0	1	0	0	1	1	1	0	0	1	1	0	0	0	0	0	0	1	1	1	0	1	0	0	0	1	1	0	1	0	1	0	0	0	1	1	1	1	0	1	0	1	0	1	1	1
S94	0	1	0	0	0	0	0	0	1	0	0	1	0	0	1	0	0	1	0	1	0	0	0	0	0	1	1	0	1	0	1	0	1	0	0	0	1	0	0	0	1	1	0	0	0	0	0	0	0
S94	1	0	1	0	1	0	0	1	1	1	0	0	1	1	0	0	0	0	0	0	1	1	1	0	1	0	0	0	1	1	0	1	0	1	0	0	0	1	1	1	1	0	1	0	1	0	1	1	1
S94	1	0	-	0	1	0	0	0	1	0	0	0	1	0	0	0	0	-	0	0	1	1	1	0	1	0	0	0	1	1	0	-	0	1	0	0	-	1	1	0	0	-	1	0	1	0	0	-	1
S94	1	0	-	0	1	0	0	0	1	0	0	0	1	0	0	0	0	-	0	0	1	1	1	0	1	0	0	0	1	1	0	-	0	1	0	0	-	1	1	0	0	-	1	0	1	0	0	-	1
S94	1	0	-	0	1	0	0	0	1	0	0	0	1	0	0	0	0	-	0	0	1	1	1	0	1	0	0	0	1	1	0	-	0	1	0	0	-	1	1	0	0	-	1	0	1	0	0	-	1
S94 Average	0.928571	0.0714286	0.727273	0	0.928571	0	0	0.571429	1	0.714286	0	0.0833333	0.928571	0.714286	0.0769231	0	0	0.0909091	0	0.0714286	0.928571	0.857143	0.928571	0	0.928571	0.0714286	0.0714286	0	1	0.928571	0.0714286	0.888889	0.0833333	0.642857	0	0	0.0909091	0.928571	0.785714	0.416667	0.714286	0.0909091	0.928571	0	0.928571	0	0.642857	0.818182	0.928571
S95	0	1	0	1	1	0	1	-	0	-	1	1	1	0	0	0	0	0	0	0	0	0	0	0	1	1	0	0	1	0	1	0	1	0	0	0	0	0	0	-	0	0	1	0	0	1	1	1	0
S95	0	1	0	1	1	0	0	0	0	0	1	0	1	0	0	0	0	0	0	0	0	0	1	0	1	1	0	0	1	0	-	1	1	-	0	0	0	0	0	-	0	0	1	0	0	0	1	1	0
S95	1	1	0	1	1	0	0	0	0	0	1	1	1	0	0	0	0	0	0	0	0	0	1	0	1	1	0	0	1	0	1	1	1	0	0	0	0	0	0	0	1	0	1	0	0	1	1	1	0
S95	1	1	0	1	1	0	0	0	0	0	1	1	1	0	0	0	0	0	0	0	0	0	1	0	1	1	0	0	1	0	1	1	1	0	0	0	0	0	0	0	1	0	1	0	0	1	1	1	0
S95 Average	0.5	1	0	1	1	0	0.25	0	0	0	1	0.75	1	0	0	0	0	0	0	0	0	0	0.75	0	1	1	0	0	1	0	1	0.75	1	0	0	0	0	0	0	0	0.5	0	1	0	0	0.75	1	1	0
S96	0	0	1	0	0	1	0	1	0	0	0	1	0	0	0	0	0	-	0	1	0	0	1	0	0	1	1	0	1	0	1	1	1	0	1	0	0	1	0	0	0	0	0	1	1	0	-	0	0
S96	0	0	1	0	0	1	0	1	0	0	0	1	1	0	0	0	0	0	0	1	0	0	1	0	0	0	1	0	1	0	1	0	1	0	1	0	0	1	0	0	0	0	0	1	1	1	1	0	0
S96	0	0	1	0	0	1	0	1	0	0	0	1	1	0	0	0	0	0	0	1	0	0	1	0	0	0	1	0	1	0	1	0	1	0	1	0	0	1	0	0	0	0	0	1	1	1	0	0	0
S96	0	0	0	0	0	1	0	1	0	0	0	1	1	0	0	0	0	0	0	0	0	0	1	0	0	0	1	0	1	0	1	0	1	0	1	0	0	1	0	0	0	0	0	1	1	1	0	0	0
S96	0	0	0	0	0	1	0	1	0	0	0	1	1	0	0	0	0	0	0	0	0	0	1	0	0	0	1	0	1	0	1	0	1	0	1	0	0	1	0	0	0	0	0	1	1	1	0	0	0
S96	0	0	1	0	0	0	0	1	0	0	0	0	1	0	0	0	0	0	0	1	0	0	1	0	0	0	1	0	1	0	1	-	1	0	1	1	0	1	0	-	-	0	0	1	1	1	-	0	0
S96	0	0	1	0	0	1	0	1	0	0	0	0	1	0	0	0	0	0	0	1	0	0	1	0	0	0	1	0	1	0	1	0	0	0	1	0	0	1	0	0	0	0	0	1	1	0	1	0	0
S96	0	0	1	0	0	1	0	1	0	0	0	0	1	0	0	0	0	0	0	1	0	0	1	0	0	0	1	0	1	0	1	0	0	0	1	0	0	1	0	0	0	0	0	1	1	0	1	0	0
S96	0	0	1	0	0	0	0	1	0	0	0	0	1	0	0	0	0	0	0	1	0	0	1	0	0	0	1	0	1	0	1	-	0	0	1	0	0	1	0	0	-	0	0	1	1	1	1	0	0
S96	0	0	1	0	0	0	0	1	0	0	0	0	1	0	0	0	0	0	0	1	0	0	1	0	0	0	1	0	1	0	1	-	0	0	1	0	0	1	0	0	-	0	0	1	1	1	1	0	0
S96	0	0	1	0	0	1	0	1	0	0	0	1	1	0	0	0	0	0	0	1	0	0	1	0	0	0	1	0	1	0	1	0	1	0	1	0	0	0	0	0	0	0	0	1	1	1	0	0	0
S96	0	0	1	0	0	0	0	1	0	0	0	1	1	0	0	0	0	0	0	-	0	0	0	0	0	0	1	0	1	0	1	1	1	0	1	0	0	1	0	-	-	0	0	1	1	1	1	0	0
S96	0	0	1	0	0	0	0	1	0	0	0	1	1	0	0	0	0	0	0	-	0	0	0	0	0	0	1	0	1	0	1	1	1	0	1	0	0	1	0	-	-	0	0	1	1	1	1	0	0
S96	0	0	1	0	0	1	0	1	0	0	0	1	1	0	0	0	0	0	0	1	0	0	1	0	0	0	1	0	1	0	1	1	1	0	1	0	0	1	0	0	0	0	0	1	1	1	1	0	0
S96	0	0	1	0	0	1	0	1	0	0	0	1	1	0	0	0	0	0	0	1	0	0	1	0	0	0	1	0	1	0	1	1	1	0	1	0	0	1	0	0	0	0	0	1	1	1	1	0	0
S96	0	0	1	0	0	1	0	1	0	0	0	0	1	0	0	0	0	0	0	1	0	0	1	0	0	0	1	0	1	0	1	1	1	0	1	0	0	1	0	0	0	0	0	1	1	1	1	0	0
S96	0	0	1	0	0	1	0	1	0	0	0	1	1	0	0	0	0	0	0	0	0	0	1	0	0	0	1	0	0	0	1	0	1	0	1	0	0	1	0	0	0	0	0	0	1	1	0	0	0
S96 Average	0	0	0.882353	0	0	0.705882	0	1	0	0	0	0.647059	0.941176	0	0	0	0	0	0	0.8	0	0	0.882353	0	0	0.0588235	1	0	0.941176	0	1	0.428571	0.764706	0	1	0.0588235	0	0.941176	0	0	0	0	0	0.941176	1	0.823529	0.666667	0	0
S97	0	0	1	0	0	0	0	1	0	0	0	1	1	0	1	0	0	0	0	1	0	0	1	0	0	0	1	0	1	0	1	1	0	0	1	0	0	1	1	0	0	0	0	1	1	1	0	0	0
S97	0	0	1	0	0	0	0	1	0	0	0	1	1	0	1	0	0	0	0	1	0	0	1	0	0	0	1	0	1	0	1	1	0	0	1	0	0	1	1	0	0	0	0	1	1	1	0	0	0
S97	0	0	1	0	0	1	0	1	0	0	0	1	1	0	1	0	0	0	0	1	0	0	1	0	0	1	1	0	1	0	1	1	0	0	1	0	0	1	1	0	0	0	0	1	1	1	1	0	0
S97	0	0	1	0	0	1	0	1	0	0	0	1	1	0	1	0	0	0	0	0	0	0	1	0	0	1	1	0	0	0	1	0	0	0	1	0	0	1	1	0	0	0	0	0	1	1	0	0	0
S97	0	0	1	0	0	0	0	1	0	0	0	1	1	0	0	0	0	0	0	1	0	0	1	0	0	0	1	0	1	0	1	0	0	-	1	0	0	1	1	0	-	0	0	1	1	0	-	0	0
S97	0	0	1	0	0	0	0	1	0	0	0	1	1	0	1	0	0	0	0	1	0	0	0	0	0	1	1	0	0	0	0	0	0	-	1	0	0	1	1	0	0	0	0	1	1	1	0	0	0
S97	0	0	1	0	0	0	0	1	0	0	0	1	1	0	1	0	0	0	0	1	0	0	1	0	0	1	1	0	1	0	1	0	0	-	1	0	0	1	1	0	0	0	0	1	1	1	1	0	0
S97	0	0	1	0	0	0	0	1	0	0	0	1	1	0	1	0	0	0	0	1	0	0	1	0	0	1	1	0	1	0	1	0	0	-	1	0	0	1	1	0	0	0	0	1	1	1	1	0	0
S97	0	0	1	0	0	0	0	1	0	0	0	1	1	0	1	0	0	0	0	1	0	0	1	0	0	1	1	0	1	0	1	0	0	-	1	0	0	1	1	0	0	0	0	1	1	1	1	0	0
S97	0	0	1	0	0	1	0	1	0	0	0	1	1	0	1	0	0	0	0	1	0	0	1	0	0	1	1	0	1	0	1	0	0	-	1	0	0	1	1	0	0	0	0	1	1	1	0	0	0
S97 Average	0	0	1	0	0	0.3	0	1	0	0	0	1	1	0	0.9	0	0	0	0	0.9	0	0	0.9	0	0	0.7	1	0	0.8	0	0.9	0.3	0	0	1	0	0	1	1	0	0	0	0	0.9	1	0.9	0.444444	0	0
S98	0	1	0	1	0	1	1	1	0	0	0	0	0	0	0	0	1	1	1	1	1	0	1	1	-	1	0	1	1	0	0	-	0	1	0	1	0	0	1	0	-	-	0	0	1	1	0	-	1
S98	0	1	0	1	0	1	1	1	0	0	0	0	0	0	0	0	1	1	1	1	1	0	1	1	-	1	0	1	1	0	0	-	0	1	0	1	0	0	1	0	-	-	0	0	1	1	0	-	1
S98	0	1	0	1	0	1	1	1	0	0	0	0	0	0	0	0	1	1	1	1	1	0	1	1	-	1	0	1	1	0	0	-	0	1	0	1	0	0	1	0	-	-	0	0	1	1	0	-	1
S98	0	1	0	1	0	1	1	1	0	0	0	0	0	0	-	0	0	1	1	1	1	0	1	0	1	0	0	1	1	0	0	0	0	1	0	1	0	0	1	-	0	-	0	0	0	1	-	1	1
S98	0	1	0	1	0	1	1	1	0	0	0	0	0	0	-	0	0	0	0	0	0	0	1	0	1	0	0	1	1	0	0	0	0	0	0	1	0	0	1	-	0	-	0	0	0	0	-	0	0
S98	0	1	0	1	0	1	1	1	0	0	0	0	0	0	1	0	1	0	0	0	0	0	1	0	1	1	0	1	1	0	0	0	0	0	0	1	0	0	1	0	0	0	0	0	0	0	0	0	0
S98	0	1	0	1	0	1	1	1	0	0	0	0	0	0	1	0	1	0	0	0	0	0	1	0	1	1	0	1	1	0	0	0	0	0	0	1	0	0	1	0	0	0	0	0	0	0	0	0	0
S98	0	1	0	0	0	0	1	0	0	0	0	0	0	0	0	0	1	0	1	1	1	0	1	1	0	1	0	1	1	0	0	-	0	0	0	1	0	0	1	-	0	0	0	0	1	1	0	1	0
S98	0	1	0	1	0	1	1	1	0	0	0	1	0	0	0	0	0	1	1	1	1	0	1	1	1	1	0	1	1	0	0	0	0	0	0	1	0	0	1	0	0	1	0	0	1	1	-	1	1
S98	0	1	0	1	0	1	1	1	0	0	0	1	0	0	0	0	0	1	1	1	1	0	1	1	1	1	0	1	1	0	0	0	0	0	0	1	0	0	1	0	0	1	0	0	1	1	-	1	1
S98	0	1	0	1	0	1	1	0	0	0	0	0	0	0	1	0	0	1	1	1	1	0	1	1	1	1	0	1	0	0	0	0	0	1	0	1	0	0	1	0	0	0	0	0	1	1	0	0	1
S98	0	1	0	1	0	0	1	0	0	0	0	0	0	0	1	0	0	0	0	0	0	0	1	0	0	1	0	1	1	0	0	0	0	0	0	1	0	0	1	0	0	0	0	0	0	0	-	0	0
S98	0	0	0	1	0	1	1	1	0	0	0	0	0	0	1	0	1	1	1	1	1	0	1	0	1	1	0	1	1	0	0	0	0	1	0	1	0	0	1	-	0	1	0	0	1	1	0	-	1
S98	0	1	0	1	0	1	1	1	0	0	0	0	0	0	1	0	1	1	1	1	1	0	1	1	0	1	0	1	1	0	0	-	0	1	0	1	0	0	1	1	0	1	0	0	1	1	0	1	1
S98	0	1	0	1	0	0	1	1	0	0	0	0	0	0	0	0	1	1	1	1	1	0	1	1	1	1	0	1	1	0	0	0	0	1	0	1	0	0	1	1	0	1	0	0	1	1	0	1	1
S98	0	1	0	1	0	0	1	1	0	0	0	0	0	0	0	0	1	0	0	0	0	0	1	0	1	1	0	1	1	0	0	0	0	0	0	1	0	0	1	0	0	0	0	0	0	0	0	0	0
S98	0	1	1	1	0	0	1	0	0	0	0	0	0	0	1	0	1	0	1	0	1	0	1	0	0	1	0	1	1	0	0	0	0	0	0	0	0	0	1	-	-	1	0	0	1	1	-	-	1
S98	0	1	1	1	0	0	1	0	0	0	0	0	0	0	1	0	1	0	1	0	1	0	1	0	0	1	0	1	1	0	0	0	0	0	0	0	0	0	1	-	-	1	0	0	1	1	-	-	1
S98	0	1	1	1	0	-	1	0	0	0	0	-	0	0	0	0	1	1	1	0	1	0	1	1	0	1	0	1	1	-	0	0	0	1	0	1	0	0	1	-	0	0	0	0	1	1	-	-	1
S98	0	1	1	1	0	-	1	0	0	0	0	-	0	0	0	0	1	0	0	0	0	0	1	0	0	1	0	1	1	-	0	0	0	0	0	1	0	0	1	-	0	0	0	0	0	0	-	-	0
S98	0	1	0	1	0	1	1	1	0	0	0	1	0	0	1	0	1	1	1	1	1	0	1	1	1	1	0	1	1	0	0	0	0	1	0	1	0	0	1	-	0	1	0	0	1	1	1	1	1
S98	0	1	0	1	0	1	1	1	0	0	0	1	0	0	1	0	1	1	1	1	1	0	1	1	1	1	0	1	1	0	0	0	0	1	0	1	0	0	1	-	0	1	0	0	1	1	1	1	1
S98	0	1	0	1	0	1	1	1	0	0	0	1	0	0	1	0	1	1	1	1	1	0	1	1	1	1	0	1	1	0	0	0	0	1	0	1	0	0	1	-	0	1	0	0	1	1	1	1	1
S98	0	1	0	1	0	0	1	1	0	0	0	0	0	0	1	0	1	1	1	1	1	0	1	0	1	0	0	1	1	0	0	0	0	0	0	1	0	0	1	-	0	1	0	0	1	1	0	1	1
S98	0	1	0	1	0	0	1	1	0	0	0	0	0	0	1	0	1	1	1	1	1	0	1	0	1	0	0	1	1	0	0	0	0	0	0	1	0	0	1	-	0	1	0	0	1	1	0	1	1
S98	0	1	0	1	0	0	1	1	0	0	0	0	0	0	1	0	1	1	1	1	1	0	1	1	1	1	0	1	1	0	0	0	0	1	0	1	0	0	1	-	0	1	0	0	1	1	1	1	1
S98	0	1	0	1	0	1	1	1	0	0	0	0	0	0	0	0	1	0	1	1	1	0	1	1	1	1	0	1	1	0	0	0	0	1	0	1	0	0	1	0	0	1	0	0	1	1	0	1	1
S98	0	1	0	1	0	1	1	1	0	0	0	0	0	0	1	0	1	1	1	1	1	0	1	1	1	1	0	1	1	0	0	0	0	1	0	1	0	0	1	1	0	1	0	0	1	1	1	1	1
S98	0	1	0	1	0	1	1	1	0	0	0	0	0	0	1	0	1	0	0	0	0	0	1	0	1	1	0	1	1	0	0	0	0	0	0	1	0	0	1	0	0	0	0	0	0	0	0	0	0
S98	0	1	0	1	0	1	1	1	0	0	0	0	0	0	1	0	1	1	1	1	1	0	1	1	1	1	0	1	1	0	0	0	0	1	0	1	0	0	1	0	0	1	0	0	1	1	0	1	1
S98	0	1	0	1	0	1	1	1	0	0	0	0	0	0	1	0	1	0	0	0	0	0	1	0	1	1	0	1	1	0	0	0	0	0	0	1	0	0	1	0	0	0	0	0	0	0	0	0	0
S98	0	1	0	1	0	1	1	1	0	0	0	0	0	0	1	0	1	1	1	1	1	0	1	1	1	1	0	1	1	0	0	0	0	1	0	1	0	0	1	1	0	1	0	0	1	1	1	1	1
S98	0	1	0	1	0	0	0	1	0	0	0	0	0	0	1	0	1	1	1	1	1	0	1	1	1	1	0	1	1	1	0	0	0	1	0	1	0	0	1	0	0	1	0	0	1	1	0	1	1
S98	0	1	0	1	0	0	0	1	0	0	0	0	0	0	1	0	1	1	1	1	1	0	1	1	1	1	0	1	1	1	0	0	0	1	0	1	0	0	1	0	0	1	0	0	1	1	0	1	1
S98	0	0	0	1	0	0	1	1	0	0	0	0	0	0	1	0	0	-	0	-	0	0	1	-	1	1	0	1	1	1	0	-	0	-	0	1	0	0	0	-	0	-	0	0	-	0	-	0	0
S98	0	1	0	1	0	0	1	1	0	0	0	0	0	0	1	0	0	1	1	1	1	0	0	1	1	1	0	1	1	1	0	0	0	0	0	1	0	0	0	1	-	0	0	0	1	1	1	0	1
S98	0	1	0	1	0	1	1	1	0	0	0	0	0	0	0	0	0	1	1	1	1	0	1	1	0	1	0	1	1	1	0	-	0	0	0	1	0	0	0	0	0	1	0	0	0	1	1	0	1
S98	0	1	0	1	0	0	0	1	0	0	0	0	0	0	0	0	1	-	1	1	1	0	1	1	1	1	0	1	1	0	0	0	0	1	0	1	0	0	1	-	0	1	0	0	0	1	0	1	1
S98	0	1	0	1	0	0	1	1	0	0	0	0	0	0	0	0	1	0	1	1	1	0	1	0	0	1	0	1	1	0	0	-	0	1	0	1	0	0	1	0	0	1	0	0	1	1	-	1	1
S98	0	1	0	1	0	0	1	1	0	0	0	0	0	0	0	0	1	0	1	1	1	0	1	0	0	1	0	1	1	0	0	-	0	1	0	1	0	0	1	0	0	1	0	0	1	1	-	1	1
S98	0	1	0	1	0	0	1	1	0	0	0	0	0	0	0	0	1	0	1	1	1	0	1	0	0	1	0	1	1	0	0	-	0	1	0	1	0	0	1	0	0	1	0	0	1	1	-	1	1
S98	0	1	0	1	0	0	1	1	0	0	0	0	0	0	1	0	1	1	1	1	1	0	0	1	0	1	0	1	1	0	0	0	0	0	1	1	0	0	1	0	0	1	0	0	1	1	1	1	0
S98	0	1	0	1	0	1	1	1	0	0	0	0	0	0	1	0	0	1	1	1	1	0	1	1	1	1	0	1	1	1	0	0	0	1	0	1	0	0	1	1	0	1	0	0	1	1	0	1	1
S98	0	1	0	1	0	1	1	1	0	0	0	0	0	0	1	0	0	1	1	1	1	0	1	1	1	1	0	1	1	1	0	0	0	1	0	1	0	0	1	1	0	1	0	0	1	1	1	1	1
S98	0	1	0	1	0	1	1	1	0	0	0	0	0	0	1	0	0	1	1	1	1	0	1	1	1	1	0	1	1	1	0	0	0	1	0	1	0	0	1	1	0	1	0	0	1	1	1	1	1
S98 Average	0	0.955556	0.0888889	0.977778	0	0.581395	0.933333	0.844444	0	0	0	0.116279	0	0	0.627907	0	0.733333	0.651163	0.8	0.75	0.8	0	0.955556	0.613636	0.714286	0.911111	0	1	0.977778	0.186047	0	0	0	0.590909	0.0222222	0.955556	0	0	0.933333	0.275862	0	0.717949	0	0	0.75	0.8	0.34375	0.702703	0.755556
S99	0	0	0	1	0	1	0	0	0	0	1	1	0	0	0	1	1	0	0	0	1	0	1	0	1	1	0	1	0	0	1	0	0	0	1	1	0	0	0	0	0	0	0	1	0	0	0	0	1
S99	0	0	0	1	1	1	0	0	0	1	1	0	0	0	0	1	1	0	0	0	1	0	1	0	1	1	0	1	0	0	1	0	0	0	1	1	0	0	0	0	0	0	0	1	0	1	0	1	1
S99	0	0	0	1	1	0	0	0	0	1	1	1	0	0	0	1	1	0	0	0	1	0	1	0	1	1	0	1	0	0	1	0	1	0	1	1	0	0	0	1	0	0	0	1	0	1	0	1	1
S99	1	0	1	1	-	1	1	0	0	0	1	-	1	0	0	0	1	1	0	1	1	1	0	1	0	0	1	1	1	1	1	-	-	0	1	1	1	1	1	-	0	1	1	1	1	-	1	1	0
S99	1	1	0	1	1	-	1	1	0	1	1	-	1	0	-	1	0	1	1	1	0	1	1	1	0	0	1	1	1	1	0	1	1	0	1	1	1	1	0	-	-	0	1	0	1	-	-	-	1
S99	0	1	1	1	0	-	0	0	0	0	1	-	0	-	0	1	0	0	1	1	0	1	-	-	1	0	0	1	1	0	1	0	1	-	1	0	1	1	1	-	-	0	1	0	0	1	-	0	1
S99	1	1	0	1	0	-	1	0	1	0	1	1	1	0	-	1	1	0	1	0	1	1	1	0	1	0	1	-	1	0	0	1	1	1	1	0	1	1	1	-	0	1	1	1	1	1	-	0	0
S99	1	1	0	1	0	-	1	0	1	0	1	1	1	0	-	1	1	0	1	0	1	1	1	0	1	0	1	-	1	0	0	1	1	1	1	0	1	1	1	-	0	1	1	1	1	1	-	0	0
S99	1	1	0	1	0	-	1	0	1	0	1	1	1	0	-	1	1	0	1	0	1	1	1	0	1	0	1	-	1	0	0	1	1	1	1	0	1	1	1	-	0	1	1	1	1	1	-	0	0
S99	1	1	0	1	0	-	1	0	1	0	1	1	1	0	-	1	1	0	1	0	1	1	1	0	1	0	1	-	1	0	0	1	1	1	1	0	1	1	1	-	0	1	1	1	1	1	-	0	0
S99	0	0	0	1	0	1	0	0	0	1	1	1	0	0	0	1	1	0	0	0	1	0	0	0	1	-	0	1	0	0	1	0	0	-	1	0	0	0	0	0	0	0	0	1	0	0	0	0	1
S99	0	0	0	1	1	1	0	0	0	1	1	1	0	0	0	1	1	0	0	0	1	0	0	0	1	-	0	1	0	0	1	0	1	-	1	0	0	0	0	0	0	0	0	1	0	0	0	0	1
S99	0	0	0	1	1	1	0	0	0	1	1	1	0	0	0	1	1	0	0	0	1	0	1	0	1	1	0	1	0	0	1	0	1	0	1	1	0	0	0	1	0	0	0	1	0	1	0	1	1
S99	0	0	0	1	1	1	0	0	0	1	1	1	0	0	-	1	1	0	0	0	1	0	1	0	1	0	0	1	0	0	0	0	1	0	1	1	0	0	0	1	0	0	0	1	0	1	0	1	1
S99	0	0	0	1	1	1	0	0	0	1	1	1	0	0	-	1	1	0	0	0	1	0	1	0	1	0	0	1	0	0	0	0	1	0	1	1	0	0	0	1	0	0	0	1	0	1	0	1	1
S99	0	0	0	1	1	1	0	0	0	1	1	1	0	0	-	1	1	0	0	0	1	0	1	0	1	0	0	1	0	0	0	0	1	0	1	1	0	0	0	1	0	0	0	1	0	1	0	1	1
S99	0	0	0	1	1	1	0	0	0	1	1	1	0	0	0	1	1	0	0	0	1	0	1	0	1	1	0	1	0	0	1	0	1	0	1	1	0	0	0	1	0	0	0	1	0	1	0	1	1
S99	0	0	0	1	1	1	0	0	0	1	1	0	0	0	0	1	1	0	0	0	1	0	1	0	1	1	0	1	0	0	1	0	1	0	1	1	0	0	0	1	-	0	0	1	0	1	-	0	1
S99 Average	0.333333	0.333333	0.111111	1	0.588235	0.916667	0.333333	0.0555556	0.222222	0.611111	1	0.866667	0.333333	0	0	0.944444	0.888889	0.111111	0.333333	0.166667	0.888889	0.388889	0.823529	0.117647	0.888889	0.375	0.333333	1	0.388889	0.111111	0.555556	0.294118	0.823529	0.266667	1	0.611111	0.388889	0.388889	0.333333	0.636364	0	0.277778	0.388889	0.888889	0.333333	0.8125	0.0909091	0.470588	0.722222
S100	1	1	0	1	1	0	0	0	0	1	1	0	1	0	-	1	0	0	1	1	1	1	-	1	0	0	1	0	1	-	0	-	1	0	1	1	1	1	1	-	-	0	1	1	1	0	0	0	1
S100	1	0	1	0	0	0	1	1	1	0	0	0	1	0	0	0	-	0	0	-	1	1	1	1	1	0	0	0	1	0	0	-	0	1	0	0	0	1	0	-	0	0	1	0	0	0	0	-	1
S100	1	0	1	0	1	1	1	1	1	0	0	0	1	1	0	0	0	0	0	0	1	1	1	1	1	0	0	0	1	1	0	1	0	1	0	0	0	1	1	1	1	0	1	0	0	0	1	1	1
S100	1	0	1	0	1	1	1	1	1	0	0	0	1	0	0	0	0	0	0	0	1	0	1	1	1	0	0	0	1	1	0	-	0	1	0	0	0	1	1	0	0	0	1	0	0	0	1	1	1
S100	0	0	1	0	1	1	1	0	1	0	0	0	1	0	0	0	0	0	0	0	1	1	1	0	1	0	0	0	1	0	0	0	0	0	0	0	0	1	1	-	0	-	1	0	0	0	1	1	1
S100	0	0	1	0	1	1	1	0	1	0	0	0	1	0	0	0	0	0	0	0	1	1	1	0	1	0	0	0	1	0	0	0	0	0	0	0	0	1	1	-	0	-	1	0	0	0	1	1	1
S100	0	0	1	0	1	1	1	0	1	0	0	0	1	0	0	0	0	0	0	0	1	1	1	0	1	0	0	0	1	0	0	0	0	0	0	0	0	1	1	-	0	-	1	0	0	0	1	1	1
S100	1	1	1	1	1	1	1	1	1	1	1	1	1	1	0	0	1	1	1	0	1	1	1	1	1	1	1	1	1	1	0	1	0	1	0	0	1	0	1	1	0	0	1	0	1	0	0	1	1
S100	1	1	0	1	1	1	1	0	1	1	1	1	1	1	0	0	0	0	1	0	1	1	1	0	1	1	1	1	1	1	0	0	0	0	0	0	1	1	1	-	-	0	0	1	1	0	0	1	1
S100	1	1	0	1	1	1	1	1	1	1	1	1	1	1	-	0	0	0	1	0	1	1	1	1	1	0	1	1	1	1	0	1	0	1	0	0	1	1	1	1	0	0	1	1	1	0	1	0	1
S100 Average	0.7	0.4	0.7	0.4	0.9	0.8	0.9	0.5	0.9	0.4	0.4	0.3	1	0.4	0	0.1	0.111111	0.1	0.4	0.111111	1	0.9	1	0.6	0.9	0.2	0.4	0.3	1	0.555556	0	0.428571	0.1	0.5	0.1	0.1	0.4	0.9	0.9	0.75	0.125	0	0.9	0.3	0.4	0	0.6	0.777778	1
S101	0	0	0	1	1	0	1	0	1	1	1	-	0	0	0	0	0	0	0	0	1	0	1	1	0	0	0	1	0	0	1	1	1	0	1	1	0	0	0	-	0	0	0	1	0	1	-	0	1
S101	0	0	0	1	1	1	1	0	1	1	1	1	0	0	1	0	1	0	0	0	1	0	1	1	0	0	0	1	0	0	1	1	1	0	1	1	0	0	0	1	0	0	0	1	0	1	1	0	1
S101	0	0	0	1	0	-	1	0	1	1	1	1	0	0	0	0	0	0	0	0	1	0	1	1	1	0	0	1	0	0	1	1	1	0	1	0	0	0	0	-	0	0	0	1	0	1	0	0	1
S101	0	0	0	1	0	-	1	0	1	1	1	1	0	0	0	0	0	0	0	0	1	0	1	1	1	0	0	1	0	0	1	1	1	0	1	0	0	0	0	-	0	0	0	1	0	1	0	0	1
S101	0	0	0	1	1	0	1	0	1	1	1	1	0	0	-	0	1	0	0	0	1	0	1	1	1	0	0	1	0	0	1	0	1	0	1	1	0	0	0	0	0	0	0	1	0	0	-	0	1
S101	0	0	0	1	1	1	1	0	1	1	1	1	0	0	1	0	1	0	0	0	1	0	1	1	1	0	0	1	0	0	1	0	1	0	1	1	0	0	0	0	0	0	0	1	0	1	1	0	1
S101	0	0	0	1	1	1	1	0	1	1	1	1	0	0	1	0	1	0	0	0	1	0	1	1	1	0	0	1	0	0	1	1	1	0	1	1	0	0	0	1	0	1	0	1	0	1	1	0	1
S101	0	0	0	1	1	1	1	0	1	1	1	1	0	0	1	0	1	0	0	0	1	0	1	1	1	0	0	1	0	0	1	1	1	0	1	1	0	0	0	1	0	0	0	1	0	1	1	0	1
S101	0	0	0	1	0	1	1	0	1	1	1	1	0	0	1	0	1	0	0	0	1	0	1	1	1	0	0	1	0	0	1	1	0	0	1	1	0	0	0	0	0	0	0	1	0	0	1	0	1
S101	0	0	0	1	1	1	1	0	1	1	1	1	0	0	1	0	1	0	0	0	1	0	1	1	1	0	0	1	0	0	1	1	1	0	1	1	0	0	0	1	0	0	0	1	0	1	1	0	1
S101	0	0	0	1	0	1	1	0	1	1	1	1	0	0	1	0	0	0	0	0	1	0	1	1	1	0	0	1	0	0	1	0	0	0	1	1	0	0	0	0	0	0	0	1	0	0	1	0	1
S101	0	0	0	1	0	1	1	0	1	1	1	1	0	0	1	0	0	0	0	0	1	0	1	1	1	0	0	1	0	0	1	0	0	0	1	1	0	0	0	0	0	0	0	1	0	0	1	0	1
S101	0	0	0	1	1	1	1	0	0	1	1	1	0	0	1	0	1	0	0	0	1	0	1	1	0	0	0	1	0	0	1	1	1	0	1	1	0	0	0	1	-	0	0	1	0	1	0	0	1
S101	0	0	0	1	1	1	1	0	1	1	1	1	0	0	1	0	1	0	0	0	1	0	1	1	1	0	0	1	0	0	1	1	1	0	1	1	0	0	0	0	0	0	0	1	0	1	1	0	1
S101	0	0	0	1	1	1	1	0	1	1	1	1	0	0	1	0	1	0	0	0	1	0	1	1	1	0	0	1	0	0	1	1	1	0	1	1	0	0	0	0	0	0	0	1	0	1	1	0	1
S101	0	0	0	1	1	1	1	0	1	1	1	1	0	0	1	0	1	0	0	0	1	0	1	1	1	0	0	1	0	0	1	1	1	0	1	1	0	0	0	0	0	0	0	1	0	1	1	0	1
S101 Average	0	0	0	1	0.6875	0.857143	1	0	0.9375	1	1	1	0	0	0.8	0	0.6875	0	0	0	1	0	1	1	0.8125	0	0	1	0	0	1	0.75	0.8125	0	1	0.875	0	0	0	0.384615	0	0.0625	0	1	0	0.75	0.785714	0	1
S102	1	1	1	1	0	-	1	0	1	1	1	0	0	1	0	0	0	-	0	0	0	0	0	0	1	0	1	1	0	0	0	-	1	0	0	0	0	1	0	-	-	0	1	1	0	0	0	1	1
S102	1	1	1	1	0	0	1	0	1	1	1	0	0	1	0	0	0	-	1	0	0	1	0	0	1	0	1	1	0	0	0	1	1	0	0	0	1	1	0	0	0	0	1	1	1	0	0	1	1
S102	1	1	0	1	0	0	1	0	1	1	1	0	0	1	0	0	0	1	1	0	0	1	0	0	1	0	1	1	0	0	0	1	1	0	0	0	1	1	0	1	1	0	1	1	1	0	0	0	1
S102	1	1	1	1	0	0	1	0	1	1	1	0	0	1	0	0	0	1	1	0	0	1	0	0	1	0	1	1	0	0	0	1	1	0	0	0	1	1	0	1	0	0	1	1	1	0	0	1	1
S102	1	1	1	1	0	0	1	0	1	1	1	0	0	1	0	0	0	1	1	0	0	1	0	0	1	0	1	1	0	0	0	1	1	0	0	0	1	1	0	1	1	0	1	1	1	0	0	1	1
S102	1	1	1	1	0	0	1	0	1	1	1	0	0	1	0	0	0	1	1	0	0	1	0	0	1	0	1	1	0	0	0	1	1	0	0	0	1	1	0	1	0	0	1	1	1	0	0	1	1
S102	1	1	1	1	0	0	1	0	1	1	1	0	0	1	0	0	0	1	0	0	0	1	0	0	0	0	1	1	0	0	0	0	1	0	0	0	1	1	0	0	0	0	1	1	1	0	0	1	1
S102	1	1	1	1	0	0	1	0	1	1	1	0	0	1	0	0	0	1	1	0	0	1	0	0	1	0	1	1	0	0	0	0	1	0	0	0	1	1	0	0	1	0	1	1	1	0	0	1	1
S102	1	1	1	1	0	0	1	0	1	1	1	0	0	1	0	0	0	1	1	0	0	1	0	0	1	0	1	1	0	0	0	0	1	0	0	0	1	1	0	0	1	0	1	1	1	0	0	1	1
S102 Average	1	1	0.888889	1	0	0	1	0	1	1	1	0	0	1	0	0	0	1	0.777778	0	0	0.888889	0	0	0.888889	0	1	1	0	0	0	0.625	1	0	0	0	0.888889	1	0	0.5	0.5	0	1	1	0.888889	0	0	0.888889	1
S103	1	1	0	0	1	0	0	0	1	1	1	0	0	1	0	1	0	0	0	1	0	0	1	1	1	0	1	1	0	0	1	1	1	0	1	1	0	1	0	0	1	0	1	1	0	0	1	1	1
S103	1	1	0	0	1	0	0	0	1	0	1	0	0	-	0	1	0	0	0	1	0	0	1	0	1	0	1	1	0	0	0	0	0	0	1	1	0	1	0	0	0	0	1	1	0	0	1	1	1
S103	1	1	0	0	1	0	0	0	1	0	1	0	0	-	0	1	0	0	0	1	0	0	1	0	1	0	1	1	0	0	0	0	0	0	1	1	0	1	0	0	0	0	1	1	0	0	1	1	1
S103	1	1	0	0	1	0	0	0	1	0	1	0	0	-	0	1	0	0	0	1	0	0	1	0	1	0	1	1	0	0	0	0	0	0	1	1	0	1	0	0	0	0	1	1	0	0	1	1	1
S103	1	1	0	0	1	0	0	0	1	0	1	0	0	-	0	1	0	0	0	1	0	0	1	0	1	0	1	1	0	0	0	0	0	0	1	1	0	1	0	0	0	0	1	1	0	0	1	1	1
S103	1	1	0	0	1	0	0	0	1	1	1	0	0	1	0	1	0	0	0	1	0	0	1	1	1	0	1	1	0	0	1	0	1	0	1	1	0	1	0	0	1	0	1	1	0	0	0	1	1
S103	1	1	0	0	1	0	0	0	1	1	1	0	0	1	0	1	0	0	0	1	0	0	1	1	1	0	1	1	0	0	1	1	1	0	1	1	0	1	0	0	1	0	1	1	0	0	1	1	1
S103	1	1	0	0	1	0	0	0	1	1	1	0	0	1	0	1	0	0	0	1	0	0	1	1	1	0	1	1	0	0	1	1	1	0	1	1	0	1	0	0	1	0	1	1	0	0	1	1	1
S103	1	1	0	0	1	0	0	0	1	1	1	0	0	1	0	1	0	0	0	1	0	0	1	1	1	0	1	1	0	0	1	1	1	0	1	1	0	1	0	0	1	0	1	1	0	0	1	1	1
S103	1	1	0	0	1	0	0	0	1	1	1	1	0	1	0	1	0	0	0	1	0	0	1	1	1	0	1	1	0	0	1	0	1	0	1	1	0	0	0	0	1	0	1	1	0	0	0	0	1
S103	1	1	0	0	1	0	0	0	1	1	1	0	0	1	0	1	0	0	0	1	0	0	1	1	1	0	1	1	0	0	1	0	1	0	1	1	0	0	0	0	1	0	1	1	0	0	0	0	1
S103	1	1	0	0	1	0	0	0	1	1	1	0	0	1	0	1	0	0	0	1	0	0	1	1	1	0	1	1	0	0	1	1	1	0	1	1	0	1	0	0	1	0	1	1	0	0	1	1	1
S103	1	1	0	0	1	0	0	0	1	1	1	0	0	1	0	1	0	0	0	1	0	0	1	1	1	0	1	1	0	0	1	1	1	0	1	1	0	1	0	0	1	0	1	1	0	0	1	1	1
S103 Average	1	1	0	0	1	0	0	0	1	0.692308	1	0.0769231	0	1	0	1	0	0	0	1	0	0	1	0.692308	1	0	1	1	0	0	0.692308	0.461538	0.692308	0	1	1	0	0.846154	0	0	0.692308	0	1	1	0	0	0.769231	0.846154	1
S104	1	1	0	0	0	1	1	0	1	1	1	0	0	1	0	1	0	0	0	1	0	0	1	1	1	0	1	0	0	0	1	0	1	0	1	1	0	1	0	0	0	0	1	1	1	0	1	1	1
S104	1	1	0	0	0	1	1	0	1	1	1	0	0	1	0	1	0	0	0	1	0	0	1	1	1	0	1	0	0	0	1	0	1	0	1	1	0	1	0	0	0	0	1	1	1	0	1	1	1
S104 Average	1	1	0	0	0	1	1	0	1	1	1	0	0	1	0	1	0	0	0	1	0	0	1	1	1	0	1	0	0	0	1	0	1	0	1	1	0	1	0	0	0	0	1	1	1	0	1	1	1
S105	1	1	0	1	1	1	0	0	1	0	1	1	0	1	0	0	0	1	1	0	0	0	1	0	1	1	1	1	1	0	0	1	1	0	1	1	0	0	0	0	0	1	0	0	0	1	0	0	0
S105	1	1	0	1	1	1	0	0	1	0	1	1	0	1	0	0	0	1	1	0	0	0	1	0	1	1	1	1	1	0	0	1	1	0	1	1	0	0	0	0	0	1	0	0	0	1	0	0	0
S105	1	1	0	1	1	1	0	0	1	0	1	1	0	1	0	0	0	1	1	0	0	0	1	0	1	1	1	1	1	0	0	1	1	0	1	1	0	0	0	0	0	1	0	0	0	1	1	0	0
S105	1	1	0	1	0	1	0	0	0	0	1	1	0	1	0	0	0	0	0	0	0	0	1	0	1	1	1	1	0	0	0	0	1	0	1	1	0	0	0	0	0	0	0	0	0	1	0	0	0
S105	1	1	0	1	0	0	0	0	0	0	1	1	0	1	0	0	0	-	0	0	0	0	1	0	1	1	1	1	0	0	0	0	1	0	1	1	0	0	0	0	0	0	0	0	0	1	-	0	0
S105	1	1	0	1	0	0	0	0	0	0	1	1	0	1	0	0	0	-	0	0	0	0	1	0	1	1	1	1	0	0	0	0	1	0	1	1	0	0	0	0	0	0	0	0	0	1	-	0	0
S105	1	1	0	1	0	0	0	0	0	0	1	1	0	1	0	0	0	-	0	0	0	0	1	0	1	1	1	1	0	0	0	0	1	0	1	1	0	0	0	0	0	0	0	0	0	1	-	0	0
S105	1	1	0	1	0	0	0	0	0	0	1	1	0	1	0	0	0	-	0	0	0	0	1	0	1	1	1	1	0	0	0	0	1	0	1	1	0	0	0	0	0	0	0	0	0	1	-	0	0
S105	1	1	0	1	1	1	0	0	1	0	1	1	0	1	0	0	0	1	1	0	0	0	1	0	1	1	1	1	1	0	0	1	1	0	1	1	0	0	0	0	1	1	0	0	0	1	1	0	0
S105	1	1	0	1	1	1	0	0	1	0	1	1	0	1	0	0	0	1	1	0	0	0	1	0	1	1	1	1	1	0	0	1	1	0	1	1	0	0	0	0	1	1	0	0	0	1	1	0	0
S105	1	1	0	1	1	1	0	0	1	0	1	1	0	1	0	0	0	0	1	0	0	0	0	0	1	1	1	1	1	0	0	-	1	0	1	1	0	0	0	-	1	0	0	0	0	1	-	0	0
S105	1	1	0	1	1	0	0	0	1	0	1	0	0	1	0	0	0	0	1	0	0	0	1	0	1	0	1	1	1	0	0	-	1	0	1	1	0	0	0	0	0	1	0	0	0	1	-	0	0
S105	1	1	0	1	1	1	0	0	1	0	1	0	0	0	0	0	0	0	1	0	0	0	1	0	1	0	1	1	0	0	0	0	0	0	1	1	0	0	0	0	0	0	0	0	0	1	0	0	0
S105	1	1	0	1	1	1	0	0	1	0	1	1	0	1	0	0	0	0	1	0	0	0	1	0	0	1	1	1	1	0	0	0	1	0	1	1	0	0	0	0	1	0	0	0	0	1	1	0	0
S105	1	1	0	1	1	1	0	0	1	0	1	1	0	1	0	0	0	0	1	0	0	0	1	0	0	1	1	1	1	0	0	0	1	0	1	1	0	0	0	0	1	0	0	0	0	1	1	0	0
S105	1	1	0	1	1	0	0	0	1	0	1	-	0	1	-	0	0	1	1	0	0	0	1	0	0	1	1	1	1	0	0	0	1	0	1	1	0	0	0	-	0	0	0	0	0	0	0	0	0
S105	1	1	0	1	1	0	0	0	1	0	1	-	0	1	-	0	0	1	1	0	0	0	1	0	0	1	1	1	1	0	0	0	1	0	1	1	0	0	0	-	0	0	0	0	0	0	0	0	0
S105	1	1	0	1	1	0	0	0	1	0	1	0	0	1	0	0	0	-	1	0	0	0	1	0	-	0	1	1	1	0	0	0	0	-	1	1	0	0	0	-	-	1	0	0	0	1	1	0	0
S105	1	1	0	1	1	0	0	0	1	0	1	1	0	1	0	0	0	1	1	0	0	0	0	0	1	1	1	1	1	0	0	0	1	0	1	1	-	0	0	-	1	0	0	0	0	1	0	0	0
S105	1	1	0	1	1	0	0	0	1	0	1	0	0	1	0	0	0	1	1	0	0	0	1	0	1	1	1	1	1	0	0	0	1	0	1	0	0	0	0	0	0	1	0	0	0	1	1	0	0
S105	1	1	0	1	1	0	0	0	1	0	1	0	0	1	0	0	0	1	1	0	0	0	1	0	1	1	1	1	1	0	0	0	1	0	1	0	0	0	0	0	0	1	0	0	0	1	1	0	0
S105	1	1	0	1	1	0	0	0	1	0	1	0	0	1	0	0	0	1	1	0	0	0	1	0	1	1	1	1	1	0	0	0	1	0	1	0	0	0	0	0	0	1	0	0	0	1	1	0	0
S105	1	1	0	1	1	1	0	0	1	0	1	1	0	1	-	0	0	0	1	0	0	0	1	0	1	1	1	1	1	0	0	1	1	0	1	1	0	0	0	-	0	1	0	0	0	1	1	0	0
S105	1	1	0	1	1	1	0	0	1	0	1	1	0	1	0	0	0	0	1	0	0	0	1	0	1	1	1	1	0	0	0	0	1	0	1	1	0	0	0	-	0	1	0	0	0	0	0	0	0
S105	1	1	0	1	1	1	0	0	1	0	1	1	0	1	0	0	0	0	1	0	0	0	1	0	1	1	1	1	0	0	0	0	1	0	1	1	0	0	0	-	0	1	0	0	0	0	0	0	0
S105	1	1	0	1	0	1	0	0	0	0	1	1	0	1	0	0	0	0	0	0	0	0	1	0	1	1	1	1	0	0	0	0	1	0	1	1	0	0	0	0	1	0	0	0	0	1	0	0	0
S105	1	1	0	1	1	1	0	0	1	0	1	1	0	1	0	0	0	1	1	0	0	0	1	0	1	1	1	1	1	0	0	1	1	0	1	1	0	0	0	0	1	1	0	0	0	1	0	0	0
S105 Average	1	1	0	1	0.777778	0.555556	0	0	0.777778	0	1	0.76	0	0.962963	0	0	0	0.545455	0.777778	0	0	0	0.925926	0	0.846154	0.888889	1	1	0.666667	0	0	0.28	0.925926	0	1	0.888889	0	0	0	0	0.307692	0.518519	0	0	0	0.851852	0.47619	0	0
S106	1	1	0	1	0	0	1	0	1	0	0	0	0	1	0	0	1	1	1	0	0	1	0	0	1	0	1	1	1	0	0	1	1	0	0	0	1	1	0	1	0	0	0	0	1	0	0	0	1
S106	1	1	0	1	0	0	1	0	1	0	0	0	0	1	0	0	1	1	1	0	0	1	0	0	1	0	1	1	1	0	0	0	1	0	0	0	1	1	0	0	1	0	0	0	1	0	0	0	1
S106	1	1	0	1	0	0	1	0	0	0	0	0	0	1	0	0	-	1	1	0	0	1	0	0	1	0	1	1	1	0	0	-	0	0	0	0	1	1	0	1	1	0	0	0	1	0	0	0	0
S106	1	1	0	1	0	0	1	0	1	0	0	0	0	1	0	0	1	1	1	0	0	1	0	0	1	0	1	1	1	0	0	1	1	0	0	0	1	1	0	0	0	0	0	0	1	0	0	0	1
S106	1	1	0	1	0	0	1	0	1	0	0	0	0	1	0	0	1	1	1	0	0	1	0	0	1	0	1	1	1	0	0	1	1	0	0	0	1	1	0	0	0	0	0	0	1	0	0	0	1
S106	1	1	0	1	0	0	1	0	1	0	0	0	0	1	0	0	1	1	1	0	0	1	0	0	1	0	1	1	1	0	0	1	1	0	0	0	1	1	0	0	1	0	0	0	1	0	0	0	1
S106	1	1	0	1	0	0	1	0	1	0	0	0	0	1	0	0	1	1	1	0	0	1	0	0	1	0	1	1	1	0	0	1	1	0	0	0	1	1	0	0	1	0	0	0	1	0	0	0	1
S106	1	1	0	1	0	0	1	0	1	0	0	0	0	1	0	0	1	1	1	0	0	1	0	0	1	0	1	1	1	0	0	1	1	0	0	0	1	1	0	0	1	0	0	0	1	0	0	0	1
S106	1	1	0	1	0	0	1	0	1	0	0	0	0	1	0	0	1	1	1	0	0	1	0	0	1	0	1	1	1	0	0	1	1	0	0	0	1	1	0	1	1	0	0	0	1	0	0	0	1
S106	1	1	0	1	0	0	1	0	1	0	0	0	0	1	0	0	1	1	1	0	0	1	0	0	1	0	1	1	1	0	0	1	1	0	0	0	1	1	0	1	0	0	0	0	1	0	0	0	1
S106	1	1	0	1	0	0	1	0	1	0	0	0	0	1	0	0	1	1	1	0	0	1	0	0	1	0	1	1	1	0	0	1	1	0	0	0	1	1	0	1	1	0	0	0	1	0	0	0	1
S106	1	1	0	1	0	0	1	0	1	0	0	0	0	1	0	0	1	1	1	0	0	1	0	0	1	0	1	1	1	0	0	1	1	0	0	0	1	1	0	1	1	0	0	0	1	0	0	0	1
S106	1	1	0	1	0	0	1	0	1	0	0	0	0	1	0	0	1	1	1	0	0	1	0	0	1	0	1	1	1	0	0	1	1	0	0	0	1	1	0	1	0	0	0	0	1	0	0	0	1
S106	1	1	0	1	0	0	1	0	1	0	0	0	0	1	0	0	1	1	1	0	0	1	0	0	1	0	1	1	1	0	0	1	1	0	0	0	1	1	0	1	0	0	0	0	1	0	0	0	1
S106	1	1	0	1	0	0	1	0	1	0	0	0	0	1	0	0	1	1	1	0	0	1	0	0	1	0	1	1	1	0	0	1	1	0	0	0	1	1	0	1	0	0	0	0	1	0	0	0	1
S106 Average	1	1	0	1	0	0	1	0	0.933333	0	0	0	0	1	0	0	1	1	1	0	0	1	0	0	1	0	1	1	1	0	0	0.928571	0.933333	0	0	0	1	1	0	0.6	0.533333	0	0	0	1	0	0	0	0.933333
S107	1	1	1	1	1	1	1	1	1	1	1	1	1	1	0	1	0	0	0	1	1	1	1	0	1	0	0	1	1	1	1	0	1	0	0	1	1	1	1	-	1	1	1	0	1	1	0	1	1
S107	1	1	1	1	1	1	1	1	1	1	1	1	1	1	0	1	0	0	0	1	1	1	1	0	1	0	0	1	1	1	1	0	1	0	0	1	1	1	1	-	1	1	1	0	1	1	0	1	1
S107	1	1	1	1	1	1	1	1	1	1	1	1	1	1	0	1	0	0	0	1	1	1	1	0	1	0	0	1	1	1	1	0	1	0	0	1	1	1	1	-	1	1	1	0	1	1	0	1	1
S107	1	1	1	1	1	1	1	1	1	1	1	1	1	1	0	1	0	0	0	1	1	1	1	0	1	0	0	1	1	1	1	0	1	0	0	1	1	1	1	-	1	1	1	0	1	1	0	1	1
S107 Average	1	1	1	1	1	1	1	1	1	1	1	1	1	1	0	1	0	0	0	1	1	1	1	0	1	0	0	1	1	1	1	0	1	0	0	1	1	1	1	#DIV/0!	1	1	1	0	1	1	0	1	1
S108	0	0	1	0	0	0	0	1	0	1	0	1	1	0	0	0	0	0	0	1	0	0	1	0	0	0	1	0	1	0	1	1	1	0	0	0	0	1	0	0	0	0	0	1	1	1	0	0	0
S108	0	0	1	0	0	0	0	1	0	1	0	1	1	0	0	0	0	0	0	1	0	0	1	0	0	0	1	0	1	0	1	1	1	0	0	0	0	1	0	0	0	0	0	1	1	1	0	0	0
S108	0	0	1	0	0	0	0	1	0	1	0	1	1	0	0	0	0	0	0	1	0	0	1	0	0	0	1	0	1	0	1	1	1	0	0	0	0	1	0	0	0	0	0	1	1	1	0	0	0
S108	0	0	1	0	0	0	0	1	0	1	0	1	1	0	0	0	0	0	0	1	0	0	1	0	0	0	1	0	1	0	1	1	1	0	0	0	0	1	0	0	-	0	0	1	1	1	1	0	0
S108	0	0	1	0	0	0	0	1	0	1	0	1	1	0	0	0	0	0	0	1	0	0	1	0	0	0	1	0	1	0	1	1	1	0	0	0	0	1	0	0	-	0	0	1	1	1	1	0	0
S108	0	0	1	0	0	1	0	1	0	1	0	0	1	0	0	0	0	0	0	1	0	0	1	0	0	0	1	0	1	0	1	-	1	0	0	0	0	1	0	0	0	0	0	1	1	1	1	0	0
S108	1	1	0	1	0	0	1	0	1	1	1	0	0	1	0	0	0	1	1	0	0	1	0	0	1	0	1	1	1	0	0	0	1	0	0	0	0	1	0	0	1	0	1	1	1	0	0	0	1
S108	1	0	0	1	0	0	0	0	1	1	1	0	0	1	0	0	0	0	0	0	0	1	0	0	1	0	1	1	1	0	0	0	1	0	0	0	0	1	0	1	1	0	1	1	1	0	-	0	1
S108	1	0	0	1	0	0	0	0	1	1	1	0	0	1	0	0	0	0	0	0	0	1	0	0	1	0	1	1	1	0	0	0	1	0	0	0	0	1	0	1	1	0	1	1	1	0	-	0	1
S108	1	1	0	1	0	0	1	0	1	1	1	0	0	1	0	0	0	1	1	0	0	1	0	0	1	0	1	1	1	0	0	1	1	0	0	0	1	1	0	1	1	0	1	1	1	0	0	0	1
S108 Average	0.4	0.2	0.6	0.4	0	0.1	0.2	0.6	0.4	1	0.4	0.5	0.6	0.4	0	0	0	0.2	0.2	0.6	0	0.4	0.6	0	0.4	0	1	0.4	1	0	0.6	0.666667	1	0	0	0	0.1	1	0	0.3	0.5	0	0.4	1	1	0.6	0.375	0	0.4
S110	0	0	1	1	0	1	1	0	0	1	0	1	0	1	1	1	1	0	0	0	0	1	0	0	0	1	0	1	0	1	1	1	1	0	0	0	0	0	0	1	1	0	0	0	1	1	1	0	0
S110	0	0	1	1	0	1	1	0	0	1	0	1	0	1	1	1	1	0	0	0	0	1	0	0	0	1	0	1	0	1	1	1	1	0	0	0	0	0	0	1	-	0	0	0	1	1	0	0	0
S110	0	0	1	1	0	1	1	0	0	1	0	0	0	1	1	1	0	0	0	0	0	1	0	0	0	1	0	1	0	1	1	1	1	0	0	0	0	0	0	-	0	0	0	0	1	1	1	0	0
S110	0	0	1	1	0	1	1	0	0	1	0	0	0	1	1	1	0	0	0	0	0	1	0	0	0	1	0	1	0	1	1	1	1	0	0	0	0	0	0	-	0	0	0	0	1	1	1	0	0
S110	0	0	1	1	0	1	1	0	0	1	0	1	0	1	1	1	1	0	0	0	0	1	0	0	0	1	0	1	0	1	1	1	1	0	0	0	0	0	0	1	-	0	0	0	1	1	1	0	0
S110 Average	0	0	1	1	0	1	1	0	0	1	0	0.6	0	1	1	1	0.6	0	0	0	0	1	0	0	0	1	0	1	0	1	1	1	1	0	0	0	0	0	0	1	0.333333	0	0	0	1	1	0.8	0	0
S111	1	0	1	0	1	1	1	1	1	0	0	0	1	1	0	0	0	0	0	0	1	1	1	1	1	0	0	0	1	1	0	0	0	0	0	0	0	1	1	0	-	0	1	0	0	0	0	1	1
S111	1	0	1	0	1	1	1	1	1	0	0	0	1	1	0	0	0	0	0	0	1	1	0	0	1	0	0	0	1	0	0	0	0	1	0	0	0	1	1	-	1	0	1	0	0	0	1	1	1
S111	1	0	1	0	1	-	1	1	1	0	0	0	1	1	0	0	0	0	0	0	1	1	-	0	1	0	0	0	1	1	0	0	0	0	0	0	0	1	1	-	0	0	1	0	0	0	0	0	1
S111	1	0	0	0	1	1	1	1	1	0	0	0	1	1	0	0	0	0	0	0	1	1	0	1	1	0	0	0	0	1	0	1	0	0	0	0	0	1	1	-	1	0	1	0	0	0	0	1	1
S111	1	0	0	0	1	1	1	1	1	0	0	0	1	1	0	0	0	0	0	0	1	1	0	1	1	0	0	0	0	1	0	1	0	0	0	0	0	1	1	-	1	0	1	0	0	0	0	1	1
S111	1	0	0	0	1	1	1	1	1	0	0	0	1	1	0	0	0	0	0	0	1	1	0	1	1	0	0	0	0	1	0	1	0	0	0	0	0	1	1	-	1	0	1	0	0	0	0	1	1
S111	1	0	0	0	1	1	1	1	1	0	0	0	1	1	0	0	0	0	0	0	0	1	0	1	1	0	0	0	1	1	0	1	0	1	0	0	0	1	1	1	0	0	1	0	0	0	1	0	1
S111	1	0	1	0	1	1	1	1	1	0	0	0	1	1	0	0	0	0	0	0	1	1	1	1	1	0	0	0	1	1	0	0	0	1	0	0	0	1	1	-	0	0	1	0	0	0	0	0	1
S111	1	0	1	0	1	1	1	1	0	0	0	0	1	1	0	0	0	0	0	0	0	0	1	0	1	0	0	0	0	0	0	0	0	0	0	0	0	1	1	-	0	0	1	0	0	0	0	0	0
S111	1	0	1	0	1	1	1	1	1	0	0	0	1	1	0	0	0	0	0	0	1	1	1	1	1	0	0	0	1	1	0	0	0	1	0	0	0	1	1	-	0	0	1	0	0	0	0	0	1
S111 Average	1	0	0.6	0	1	1	1	1	0.9	0	0	0	1	1	0	0	0	0	0	0	0.8	0.9	0.444444	0.7	1	0	0	0	0.6	0.8	0	0.4	0	0.4	0	0	0	1	1	0.5	0.444444	0	1	0	0	0	0.2	0.5	0.9
S112	1	1	0	1	0	0	1	0	1	0	0	0	0	1	0	0	1	1	1	0	0	1	0	0	1	0	1	1	1	0	0	1	1	0	0	0	1	1	0	1	1	0	0	0	1	0	0	0	1
S112	1	1	0	1	0	0	1	0	1	0	0	0	0	1	0	0	1	1	1	0	0	1	0	0	1	0	1	1	1	0	0	1	1	0	0	0	1	1	0	1	1	0	0	0	1	0	0	0	1
S112	1	1	0	1	0	0	1	0	1	0	0	0	0	1	0	0	1	1	1	0	0	1	0	0	1	0	1	1	1	0	0	1	1	0	0	0	1	1	0	1	1	0	0	0	1	0	0	0	1
S112	1	1	0	1	0	0	1	0	1	0	0	0	0	1	0	0	1	1	1	0	0	1	0	0	1	0	1	1	1	0	0	1	1	0	0	0	1	1	0	1	1	0	0	0	1	0	0	0	1
S112	1	1	0	1	0	0	1	0	1	0	0	0	0	1	0	0	1	1	1	0	0	1	0	0	1	0	1	1	1	0	0	1	1	0	0	0	1	1	0	1	1	0	0	0	1	0	0	0	1
S112	1	1	0	1	0	0	1	0	1	0	0	0	0	1	0	0	1	1	1	0	0	1	0	0	1	0	1	1	1	0	0	1	1	0	0	0	1	1	0	1	1	0	0	0	1	0	0	0	1
S112	1	1	0	1	0	0	1	0	1	0	0	0	0	1	0	0	1	1	1	0	0	1	0	0	1	0	1	1	1	0	0	1	1	0	0	0	1	1	0	1	1	0	0	0	1	0	0	0	1
S112	1	1	0	1	0	0	1	0	1	0	0	0	0	1	0	0	1	1	1	0	0	1	0	0	1	0	1	1	1	0	0	1	1	-	0	0	1	1	0	1	1	0	0	0	1	0	0	0	1
S112	1	1	0	1	0	0	1	0	1	0	0	0	0	1	0	0	1	1	1	0	0	1	0	0	1	0	1	1	1	0	0	1	1	0	0	0	1	1	0	-	1	0	0	0	1	0	0	0	1
S112	1	1	0	1	0	0	1	0	1	0	0	0	0	1	0	0	1	1	1	0	0	1	0	0	1	0	1	1	1	0	0	1	1	0	0	0	1	1	0	1	1	0	0	0	1	0	0	0	1
S112	1	1	0	1	0	0	1	0	1	0	0	0	0	1	0	0	1	1	1	0	0	1	0	0	1	0	1	1	1	0	0	1	1	0	0	0	1	1	0	1	1	0	0	0	1	0	0	0	1
S112	1	1	0	1	0	0	1	0	1	0	0	0	0	1	0	0	1	1	1	0	0	1	0	0	1	0	1	1	1	0	0	1	1	0	0	0	1	1	0	1	1	0	0	0	1	0	0	0	1
S112	1	1	0	1	0	0	1	0	1	0	0	0	0	1	0	0	1	1	1	0	0	1	0	0	1	0	1	1	1	0	0	1	1	0	0	0	1	1	0	1	1	0	0	0	1	0	0	0	1
S112	1	1	0	1	0	0	1	0	1	0	0	0	0	1	0	0	1	1	1	0	0	1	0	0	1	0	1	1	1	0	0	1	1	0	0	0	1	1	0	1	1	0	0	0	1	0	0	0	1
S112	1	1	0	1	0	0	1	0	1	0	0	0	0	1	0	0	1	1	1	0	0	1	0	0	1	0	1	1	1	0	0	1	1	0	0	0	1	1	0	1	1	0	0	0	1	0	0	0	1
S112	1	1	0	1	0	0	1	0	1	0	0	0	0	1	0	0	1	1	1	0	0	1	0	0	1	0	1	1	1	0	0	1	1	0	0	0	1	1	0	1	1	0	0	0	1	0	0	0	1
S112 Average	1	1	0	1	0	0	1	0	1	0	0	0	0	1	0	0	1	1	1	0	0	1	0	0	1	0	1	1	1	0	0	1	1	0	0	0	1	1	0	1	1	0	0	0	1	0	0	0	1
S113	0	1	0	0	0	0	1	1	1	1	0	0	0	1	0	0	0	1	1	0	0	0	1	0	0	0	0	0	1	0	0	0	0	0	1	1	1	0	1	1	0	1	1	0	1	1	1	1	1
S113	0	1	0	0	0	0	1	1	1	1	0	0	0	1	0	0	0	-	1	0	0	0	1	0	0	0	0	0	1	0	0	0	0	0	1	1	1	0	1	0	0	1	1	0	1	1	1	1	1
S113	0	1	0	0	0	0	1	1	1	1	0	0	0	1	0	0	0	1	1	0	0	0	1	0	0	0	0	0	1	0	0	0	0	0	1	1	1	0	1	-	0	1	1	0	1	1	0	1	1
S113	0	1	0	0	0	0	1	1	1	1	0	0	0	1	0	0	0	1	1	0	0	0	1	0	0	0	0	0	1	0	0	0	0	0	1	1	1	0	1	0	0	1	1	0	1	1	1	1	1
S113	0	1	0	0	0	0	1	1	1	1	0	0	0	1	0	0	0	1	1	0	0	0	1	0	0	0	0	0	1	0	0	0	0	0	1	1	1	0	1	1	0	1	1	0	1	1	1	1	1
S113	0	1	0	0	0	0	1	1	1	1	0	0	0	1	0	0	0	1	1	0	0	0	1	0	0	0	0	0	1	0	0	0	0	0	1	1	1	0	1	1	0	1	1	0	1	1	1	1	1
S113	0	1	0	0	0	0	1	1	1	0	0	0	0	0	0	0	0	1	1	0	0	0	1	0	0	0	0	0	1	0	0	0	0	0	1	1	1	0	1	1	0	1	1	0	1	1	1	0	1
S113	0	1	0	0	0	0	1	1	1	0	0	0	0	0	0	0	0	1	1	0	0	0	1	0	0	0	0	0	1	0	0	0	0	0	1	1	1	0	1	1	0	1	1	0	1	1	1	0	1
S113	0	1	0	0	0	0	1	1	1	0	0	0	0	0	0	0	0	1	1	0	0	0	1	0	0	0	0	0	1	0	0	0	0	0	1	1	1	0	1	1	0	1	1	0	1	1	1	0	1
S113 Average	0	1	0	0	0	0	1	1	1	0.666667	0	0	0	0.666667	0	0	0	1	1	0	0	0	1	0	0	0	0	0	1	0	0	0	0	0	1	1	1	0	1	0.75	0	1	1	0	1	1	0.888889	0.666667	1
S114	1	0	1	0	1	1	1	0	1	0	0	0	1	1	0	0	0	0	0	0	1	1	1	1	1	0	0	0	1	0	0	1	0	1	0	0	0	1	1	1	0	0	1	0	0	0	1	0	1
S114	1	0	1	0	1	1	0	1	1	0	0	0	1	1	0	0	0	-	0	0	1	1	1	0	1	0	0	0	1	1	0	0	0	-	0	0	0	1	1	0	-	0	1	0	1	0	1	1	1
S114	1	0	1	0	1	0	1	1	1	0	0	0	1	1	0	0	0	0	0	0	1	1	1	0	1	0	0	0	1	1	0	-	0	1	0	0	0	1	1	0	0	0	1	0	1	0	0	1	1
S114	1	0	1	0	1	0	1	1	1	0	0	0	1	1	0	0	0	0	0	0	1	0	1	1	0	0	0	0	1	1	0	0	0	0	0	0	0	1	0	0	1	0	1	0	0	0	-	1	1
S114	1	0	1	0	1	0	1	1	1	0	0	0	1	1	0	0	0	0	0	0	1	0	1	1	0	0	0	0	1	1	0	0	0	0	0	0	0	1	0	0	1	0	1	0	0	0	-	1	1
S114	1	0	-	0	1	0	1	1	1	0	0	0	1	1	0	0	0	0	0	0	1	0	1	1	0	0	0	0	1	1	0	0	0	1	0	0	0	1	1	0	0	0	1	0	1	0	1	0	0
S114	0	0	0	0	1	0	1	1	1	0	0	0	1	1	0	0	0	0	0	0	1	1	1	0	0	0	0	0	1	1	0	1	0	1	0	0	0	1	1	-	1	0	1	0	1	0	-	0	-
S114	1	0	1	0	1	-	1	0	1	0	0	0	0	1	0	0	0	0	0	0	1	1	1	1	-	0	0	0	0	-	0	-	0	1	0	0	0	1	1	1	1	-	1	0	1	0	1	1	1
S114	1	0	1	0	1	1	1	1	1	0	0	0	1	1	0	0	0	0	0	0	1	1	1	1	1	0	0	0	1	1	0	0	0	1	0	0	0	1	1	0	1	0	1	0	1	0	1	1	1
S114	1	0	1	0	1	1	1	1	1	0	0	0	1	1	0	0	0	0	0	0	1	1	1	1	1	0	0	0	1	1	0	0	0	1	0	0	0	1	1	0	1	0	1	0	1	0	1	1	1
S114	1	0	1	0	1	1	1	1	1	0	0	0	1	1	0	0	0	0	0	0	1	1	1	1	1	0	0	0	1	1	0	0	0	1	0	0	0	1	1	0	1	0	1	0	1	0	1	1	1
S114	1	0	1	0	1	1	1	1	1	0	0	0	1	1	0	0	0	0	0	0	1	1	1	1	1	0	0	0	1	1	0	0	0	1	0	0	0	1	1	1	1	0	1	0	1	0	1	1	1
S114	1	0	1	0	1	1	1	1	1	0	0	0	1	1	0	0	0	0	0	0	1	1	1	1	1	0	0	0	1	1	0	1	0	1	0	0	0	1	1	0	0	0	1	0	1	0	0	1	1
S114	1	0	1	0	1	1	1	1	1	0	0	0	1	0	0	0	0	0	0	0	1	1	1	1	1	0	0	0	0	0	0	1	0	1	0	0	0	1	1	0	0	0	1	0	0	0	0	0	0
S114 Average	0.928571	0	0.923077	0	1	0.615385	0.928571	0.857143	1	0	0	0	0.928571	0.928571	0	0	0	0	0	0	1	0.785714	1	0.785714	0.692308	0	0	0	0.857143	0.846154	0	0.333333	0	0.846154	0	0	0	1	0.857143	0.230769	0.615385	0	1	0	0.714286	0	0.727273	0.714286	0.846154
S115	1	1	0	1	0	0	1	0	1	0	0	0	0	1	0	0	1	1	1	0	0	1	0	0	1	0	1	1	1	0	0	1	1	0	0	0	1	1	0	0	1	0	0	0	1	0	0	0	1
S115	1	1	0	1	0	0	1	0	1	0	0	0	0	1	0	0	1	1	1	0	0	1	0	0	1	0	1	1	1	0	0	1	1	0	0	0	1	1	0	1	1	0	0	0	1	0	0	0	1
S115	1	1	0	1	0	0	1	0	1	0	0	0	0	1	0	0	1	1	1	0	0	1	0	0	1	0	1	1	1	0	0	1	1	0	0	0	1	1	0	1	1	0	0	0	1	0	0	0	1
S115	0	1	1	1	1	0	0	1	1	0	0	0	0	1	0	0	0	1	1	1	0	0	0	0	0	0	1	1	0	0	0	1	0	1	0	0	0	0	0	1	1	0	1	0	1	0	0	0	1
S115	0	1	1	1	1	0	0	1	1	0	0	0	0	1	0	0	0	1	1	0	0	0	0	0	0	0	1	1	0	0	0	1	0	1	0	0	0	0	0	1	0	0	1	0	1	0	0	0	1
S115 Average	0.6	1	0.4	1	0.4	0	0.6	0.4	1	0	0	0	0	1	0	0	0.6	1	1	0.2	0	0.6	0	0	0.6	0	1	1	0.6	0	0	1	0.6	0.4	0	0	0.6	0.6	0	0.8	0.8	0	0.4	0	1	0	0	0	1
S117	1	1	0	0	1	0	1	0	1	1	1	1	0	0	0	1	0	0	0	0	1	0	0	0	1	1	1	1	1	1	1	1	1	0	0	0	0	1	0	1	0	0	0	1	0	0	1	0	1
S117	1	1	0	0	1	0	1	0	0	1	1	1	0	0	0	1	0	0	0	0	0	0	0	0	1	1	1	1	0	0	1	0	1	0	0	0	0	1	0	1	0	0	0	0	0	0	0	0	0
S117	1	1	0	0	1	0	1	0	1	1	1	1	0	0	0	1	0	0	0	0	1	0	0	0	0	1	1	1	1	1	1	0	1	0	0	0	0	1	0	0	-	0	0	1	0	0	0	0	0
S117	1	1	1	0	1	0	1	0	1	1	1	1	0	0	0	1	0	0	0	0	1	0	0	0	1	1	1	1	1	1	1	1	1	0	0	0	0	1	0	0	-	0	0	1	0	0	1	0	1
S117	1	1	1	0	1	0	1	0	1	1	1	1	0	0	0	1	0	0	0	0	1	0	0	0	1	1	1	1	1	1	1	1	1	0	0	0	0	1	0	0	-	0	0	1	0	0	1	0	1
S117	1	1	1	0	1	0	1	0	1	1	1	1	0	0	0	1	0	0	0	0	1	0	0	0	1	1	1	1	1	1	1	1	1	0	0	0	0	1	0	0	0	0	0	1	0	0	1	0	1
S117	1	1	0	0	1	0	1	0	1	1	1	1	0	0	0	1	0	0	0	1	1	0	0	0	1	1	1	1	1	0	1	1	1	0	0	0	0	1	0	-	0	0	0	1	0	0	1	0	1
S117	1	1	0	0	1	0	1	0	1	1	1	1	0	0	0	1	0	0	0	1	1	0	0	0	1	1	1	1	1	0	1	1	1	0	0	0	0	1	0	-	0	0	0	1	0	0	1	0	1
S117	1	1	0	0	1	0	1	0	1	1	1	1	0	0	0	1	0	0	0	1	1	0	0	0	1	1	1	1	1	0	1	1	1	0	0	0	0	1	0	-	0	0	0	1	0	0	1	0	1
S117	1	1	0	0	1	0	1	0	1	1	1	1	0	0	0	1	0	-	0	1	1	0	0	0	1	1	1	1	1	1	1	1	1	0	0	0	0	1	0	1	0	0	0	1	0	0	1	0	1
S117 Average	1	1	0.3	0	1	0	1	0	0.9	1	1	1	0	0	0	1	0	0	0	0.4	0.9	0	0	0	0.9	1	1	1	0.9	0.6	1	0.8	1	0	0	0	0	1	0	0.428571	0	0	0	0.9	0	0	0.8	0	0.8
S118	0	1	0	0	1	0	1	1	1	1	1	1	1	0	0	1	1	1	1	0	1	0	0	1	1	0	0	1	1	0	0	0	1	0	0	0	1	0	0	0	-	1	0	1	0	1	0	0	1
S118	0	1	0	0	1	1	1	1	1	1	1	1	1	0	0	1	1	1	1	0	1	0	0	1	1	0	1	1	1	0	0	1	1	0	0	0	1	0	0	1	0	1	0	1	0	1	0	1	1
S118	0	1	0	0	1	1	0	1	1	0	1	1	1	0	0	1	-	0	1	0	1	0	0	1	1	0	1	1	1	0	0	-	0	0	0	0	1	0	0	0	0	1	0	1	-	0	0	0	1
S118	0	1	0	0	1	0	1	1	0	1	1	1	1	0	0	1	1	1	1	0	0	0	0	1	1	0	1	1	1	0	0	1	1	-	0	0	1	0	0	0	0	1	0	0	0	1	0	0	1
S118	0	1	0	0	0	1	1	0	1	1	1	0	1	0	0	1	0	1	1	0	1	0	0	-	1	0	1	1	1	0	0	0	1	0	0	0	1	0	0	-	0	1	0	0	0	1	-	0	1
S118	0	1	0	0	0	1	1	0	1	1	1	0	1	0	0	1	0	1	1	0	1	0	0	-	1	0	1	1	1	0	0	0	1	0	0	0	1	0	0	-	0	1	0	0	0	1	-	0	1
S118	0	1	0	0	0	1	1	0	1	1	1	0	1	0	0	1	0	1	1	0	1	0	0	-	1	0	1	1	1	0	0	0	1	0	0	0	1	0	0	-	0	1	0	0	0	1	-	0	1
S118	0	1	0	0	1	1	1	1	1	1	1	1	1	0	0	1	1	1	1	0	1	0	0	1	1	0	1	1	1	0	0	1	1	0	0	0	1	0	0	1	0	1	0	1	0	1	0	1	1
S118	0	1	0	0	1	1	1	1	1	1	1	1	1	0	0	1	1	1	1	0	1	0	0	1	1	0	1	1	1	0	0	1	1	0	0	0	1	0	0	1	0	1	0	1	0	1	0	1	1
S118	0	1	0	0	1	1	1	1	1	1	1	1	1	0	0	1	1	1	1	0	1	0	0	1	1	0	1	1	1	0	0	1	1	0	0	0	1	0	0	1	0	1	0	1	0	1	0	1	1
S118	0	1	-	0	1	0	1	0	1	1	1	0	1	-	0	1	0	0	1	0	1	0	0	1	1	0	1	1	1	0	0	0	1	-	0	0	0	0	0	-	0	0	0	1	0	0	0	-	1
S118	0	1	0	0	1	1	1	1	1	1	1	1	1	0	0	1	1	1	1	0	1	0	0	1	1	0	1	1	1	0	0	1	0	0	0	0	1	0	0	-	0	1	0	1	0	1	0	1	1
S118	0	1	0	0	1	1	1	1	0	1	1	0	1	0	0	1	1	1	1	0	1	0	0	1	1	0	1	1	1	0	0	0	1	0	0	0	1	0	0	0	0	1	0	1	0	1	0	1	1
S118 Average	0	1	0	0	0.769231	0.769231	0.923077	0.692308	0.846154	0.923077	1	0.615385	1	0	0	1	0.666667	0.846154	1	0	0.923077	0	0	1	1	0	0.923077	1	1	0	0	0.5	0.846154	0	0	0	0.923077	0	0	0.5	0	0.923077	0	0.692308	0	0.846154	0	0.5	1
S120	1	1	0	0	0	0	0	0	1	1	1	0	0	1	0	1	0	0	0	1	0	0	1	1	1	0	1	1	0	0	1	0	1	0	1	1	0	1	0	0	1	0	1	1	0	0	1	1	1
S120 Average	1	1	0	0	0	0	0	0	1	1	1	0	0	1	0	1	0	0	0	1	0	0	1	1	1	0	1	1	0	0	1	0	1	0	1	1	0	1	0	0	1	0	1	1	0	0	1	1	1
S121	1	1	0	0	1	0	0	0	1	1	1	0	0	1	0	1	0	0	0	1	0	0	1	1	1	0	1	1	0	0	1	1	1	0	1	1	0	1	0	0	1	0	1	0	0	0	1	1	1
S121	1	1	0	0	1	0	0	0	1	1	1	0	0	1	0	1	0	0	0	1	0	0	1	1	1	0	1	1	0	0	1	1	1	0	1	1	0	1	0	0	1	0	1	1	0	0	1	1	1
S121	1	1	0	0	1	0	0	0	1	1	1	0	0	1	0	1	0	0	0	1	0	0	1	1	1	0	1	1	0	0	1	1	1	0	1	1	0	1	0	0	1	0	1	1	0	0	1	1	1
S121	1	1	0	0	1	0	0	0	1	1	1	0	0	0	0	1	0	0	0	1	0	0	1	1	1	0	1	1	0	0	1	1	0	0	1	1	0	1	0	0	-	0	1	1	0	0	0	0	1
S121	1	1	0	0	1	0	0	0	1	1	1	0	0	1	0	1	0	0	0	1	0	0	1	1	1	0	1	1	0	0	1	1	1	0	1	1	0	1	0	0	1	0	1	1	0	0	1	1	1
S121	1	1	0	0	0	0	0	0	1	1	1	0	0	1	0	1	0	0	0	1	0	0	1	1	1	0	1	1	0	0	1	-	1	0	1	1	0	1	0	0	0	0	1	0	0	0	0	-	1
S121	1	1	0	0	0	0	0	0	1	1	1	0	0	1	0	1	0	0	0	1	0	0	1	1	1	0	1	1	0	0	1	-	1	0	1	1	0	1	0	0	0	0	1	0	0	0	0	-	1
S121	1	1	0	0	0	0	0	0	1	1	1	0	0	1	0	1	0	0	0	1	0	0	1	1	1	0	1	1	0	0	1	-	1	0	1	1	0	1	0	0	0	0	1	0	0	0	0	-	1
S121	1	1	0	0	1	0	0	0	1	1	1	0	0	1	-	1	0	-	0	1	0	0	1	1	1	0	1	1	0	0	0	1	1	0	1	0	0	1	0	-	0	0	1	1	0	0	-	1	1
S121	1	1	0	0	1	0	0	0	1	1	1	0	0	1	-	1	0	-	0	1	0	0	1	1	1	0	1	1	0	0	0	1	1	0	1	0	0	1	0	-	0	0	1	1	0	0	-	1	1
S121	1	1	0	0	1	0	0	0	1	1	1	0	0	1	-	1	0	-	0	1	0	0	1	1	1	0	1	1	0	0	0	1	1	0	1	0	0	1	0	-	0	0	1	1	0	0	-	1	1
S121 Average	1	1	0	0	0.727273	0	0	0	1	1	1	0	0	0.909091	0	1	0	0	0	1	0	0	1	1	1	0	1	1	0	0	0.727273	1	0.909091	0	1	0.727273	0	1	0	0	0.4	0	1	0.636364	0	0	0.5	0.875	1
S122	0	1	0	0	0	0	1	1	1	1	0	0	0	1	0	0	0	1	1	0	0	0	1	0	0	0	0	0	1	0	0	-	0	0	1	1	1	0	1	1	-	0	1	0	1	1	1	1	1
S122	0	1	0	0	0	0	1	1	1	1	0	0	0	1	0	0	0	1	1	0	0	0	1	0	0	0	0	0	1	0	0	-	0	0	1	1	1	0	1	1	-	0	1	0	1	1	1	1	1
S122	0	1	0	0	0	1	1	1	1	1	0	0	0	1	0	0	0	1	1	0	0	0	1	0	0	0	0	0	1	0	0	-	0	0	1	1	1	0	1	1	-	0	1	0	1	1	1	1	1
S122	0	1	0	0	0	0	1	1	1	1	0	0	0	1	0	0	0	1	1	0	0	0	1	0	0	0	0	0	0	0	0	0	0	0	1	1	1	0	1	-	-	-	1	0	0	1	0	0	1
S122	0	1	0	0	0	0	1	1	1	1	0	0	0	1	0	0	0	1	1	0	0	0	1	0	0	0	0	0	0	0	0	0	0	0	1	1	1	0	1	-	-	-	1	0	0	1	0	0	1
S122	0	1	0	0	0	0	1	1	1	1	0	0	0	1	0	0	0	1	1	0	0	0	1	0	0	0	0	0	1	1	0	0	0	0	1	1	1	0	1	1	0	0	1	0	1	1	1	1	1
S122	0	1	0	0	0	0	1	1	1	1	0	0	0	1	0	0	0	1	1	0	0	0	1	0	0	0	0	0	1	1	0	0	0	0	1	1	1	0	1	1	0	0	1	0	1	1	1	1	1
S122	0	1	0	0	0	0	1	1	1	1	0	0	0	1	0	0	0	1	1	0	0	0	1	0	0	0	0	0	1	1	0	0	0	0	1	1	1	0	1	1	0	0	1	0	1	1	1	1	1
S122	0	1	0	0	0	0	1	1	1	1	0	0	0	1	0	0	0	1	1	0	0	0	1	0	0	0	0	0	1	1	0	0	0	0	1	1	1	0	1	1	0	0	1	0	1	1	1	1	1
S122	0	1	0	0	0	0	1	1	1	1	0	0	0	1	0	0	0	1	1	0	0	0	1	0	0	0	0	0	1	1	0	0	0	0	1	1	1	0	1	1	0	0	1	0	1	1	1	1	1
S122	0	1	0	0	0	-	1	1	1	1	0	0	0	1	0	0	0	1	1	0	0	0	1	0	0	0	0	0	1	1	0	0	0	0	0	1	1	0	1	0	0	0	1	0	1	1	-	1	1
S122	0	1	0	0	0	0	1	1	1	0	0	0	0	1	0	0	0	1	1	0	0	0	1	0	0	0	0	0	1	1	0	0	0	0	1	1	1	0	1	0	0	0	1	0	1	1	1	1	1
S122 Average	0	1	0	0	0	0.0909091	1	1	1	0.916667	0	0	0	1	0	0	0	1	1	0	0	0	1	0	0	0	0	0	0.833333	0.583333	0	0	0	0	0.916667	1	1	0	1	0.8	0	0	1	0	0.833333	1	0.818182	0.833333	1
S123	0	0	0	0	1	0	1	0	1	1	0	0	0	1	0	0	0	0	0	1	0	0	0	0	0	0	0	0	1	0	0	0	0	0	1	1	0	0	1	-	0	0	1	0	0	0	1	0	0
S123	0	0	0	0	1	0	1	0	1	1	0	0	0	1	0	0	0	0	0	1	0	0	0	0	0	0	0	0	1	0	0	0	0	0	1	1	0	0	1	-	0	0	1	0	0	0	1	0	0
S123	0	1	0	1	1	0	1	1	1	1	1	1	1	1	1	1	1	1	1	1	0	1	1	0	1	1	0	0	1	1	1	0	1	1	1	1	1	0	1	-	1	1	1	1	0	0	1	0	1
S123	0	1	0	0	0	0	0	0	1	1	1	1	0	0	1	0	1	0	0	0	0	0	0	0	0	1	0	0	1	1	1	0	0	1	0	0	1	0	0	-	1	0	0	1	0	0	0	1	1
S123	0	1	0	1	0	0	1	0	1	1	1	1	1	0	1	1	1	1	1	0	0	1	0	0	1	1	0	0	1	1	1	0	1	1	0	0	1	0	1	-	1	1	0	1	0	0	0	0	1
S123	0	0	0	0	1	0	1	1	1	1	0	0	0	1	0	0	0	0	0	1	0	0	1	0	0	1	0	0	1	1	0	0	0	0	1	1	1	0	1	0	0	0	1	0	1	0	0	0	0
S123	0	0	0	0	1	0	1	1	1	1	0	0	0	1	0	0	0	0	0	1	0	0	1	0	0	1	0	0	1	1	0	0	0	0	1	1	1	0	1	0	0	0	1	0	1	0	0	0	0
S123 Average	0	0.428571	0	0.285714	0.714286	0	0.857143	0.428571	1	1	0.428571	0.428571	0.285714	0.714286	0.428571	0.285714	0.428571	0.285714	0.285714	0.714286	0	0.285714	0.428571	0	0.285714	0.714286	0	0	1	0.714286	0.428571	0	0.285714	0.428571	0.714286	0.714286	0.714286	0	0.857143	0	0.428571	0.285714	0.714286	0.428571	0.285714	0	0.428571	0.142857	0.428571
S125	0	1	0	0	1	0	1	1	1	1	0	0	0	1	0	0	0	0	0	0	0	0	1	0	0	1	0	0	1	1	0	0	0	0	1	1	1	0	1	1	0	0	1	0	1	0	1	0	1
S125	0	1	0	0	0	0	1	1	1	1	1	0	0	-	0	1	1	0	0	1	0	0	1	1	1	0	1	0	0	0	1	-	0	0	1	1	0	1	0	-	1	1	1	1	1	0	1	-	1
S125	0	1	0	0	0	0	1	1	1	1	1	0	0	1	0	1	1	0	0	1	0	0	1	1	0	0	1	0	0	0	1	0	0	0	1	1	-	1	0	0	-	0	1	1	1	0	0	0	0
S125	0	1	0	0	0	0	1	1	1	1	1	0	0	1	0	1	1	0	0	1	0	0	1	1	1	0	1	0	0	0	1	0	0	0	1	1	0	1	0	0	1	1	1	1	1	0	1	1	1
S125	0	1	0	0	0	0	1	1	1	1	1	0	0	1	0	1	1	0	0	1	0	0	1	1	1	0	1	0	0	0	1	0	0	0	1	1	0	1	0	0	1	1	1	1	1	0	1	1	1
S125	0	1	0	0	0	0	1	1	1	1	1	0	0	1	0	1	1	0	0	1	0	0	1	1	1	0	1	0	0	0	1	0	0	0	1	1	0	1	0	0	1	1	1	1	1	0	1	1	1
S125 Average	0	1	0	0	0.166667	0	1	1	1	1	0.833333	0	0	1	0	0.833333	0.833333	0	0	0.833333	0	0	1	0.833333	0.666667	0.166667	0.833333	0	0.166667	0.166667	0.833333	0	0	0	1	1	0.2	0.833333	0.166667	0.2	0.8	0.666667	1	0.833333	1	0	0.833333	0.6	0.833333
S126	1	1	0	1	1	1	0	0	1	0	1	1	0	1	0	0	0	1	1	0	0	0	0	0	0	1	1	1	1	0	0	1	1	0	0	1	0	0	0	-	0	0	0	0	0	1	1	0	0
S126	1	0	0	1	1	-	0	0	1	0	1	1	0	1	0	0	0	0	0	0	0	0	1	0	1	1	1	1	1	0	0	1	1	0	0	1	-	0	0	0	-	0	0	0	0	1	0	0	0
S126	1	1	0	1	1	0	0	0	1	0	1	1	0	1	0	0	0	0	1	0	0	0	1	0	0	0	1	1	1	0	0	0	1	-	0	1	0	0	0	0	0	-	0	0	0	1	0	0	0
S126	1	1	0	1	1	0	0	0	1	0	1	1	0	1	0	0	0	0	1	0	0	0	1	0	0	0	1	1	1	0	0	0	1	-	0	1	0	0	0	0	0	-	0	0	0	1	0	0	0
S126	1	1	0	1	1	0	0	0	1	0	1	1	0	1	0	0	0	1	1	0	0	0	1	0	1	1	1	1	1	0	0	1	1	0	0	1	0	0	0	0	1	0	0	0	0	1	1	0	0
S126	1	1	0	1	1	0	0	0	1	0	1	1	0	1	0	0	0	1	1	0	0	0	1	0	1	1	1	1	1	0	0	1	1	0	0	1	0	0	0	0	1	0	0	0	0	1	1	0	0
S126	1	1	0	0	1	0	0	0	1	0	1	1	0	1	0	0	0	1	1	0	0	0	1	0	1	1	1	1	1	0	0	1	1	0	0	1	0	0	0	0	0	0	0	0	0	1	1	0	0
S126	1	1	0	1	1	-	0	0	1	0	1	1	0	1	0	0	0	1	1	0	0	0	1	0	1	1	1	1	1	0	0	1	1	-	0	0	0	0	0	0	0	0	0	0	0	1	1	0	0
S126	1	1	0	1	1	0	0	0	1	0	1	1	0	1	0	0	0	1	1	0	0	0	1	0	1	1	1	1	1	0	0	1	1	0	0	1	0	0	0	0	1	0	0	0	0	1	1	0	0
S126	1	1	0	1	1	0	0	0	1	0	1	1	0	1	0	0	0	1	1	0	0	0	1	0	1	1	1	1	1	0	0	1	1	0	0	1	0	0	0	0	-	0	0	0	0	1	0	0	0
S126	1	1	0	1	1	0	0	0	1	0	1	1	0	1	0	0	0	1	1	0	0	0	1	0	1	1	1	1	1	0	0	1	1	0	0	1	0	0	0	0	-	0	0	0	0	1	0	0	0
S126	1	0	0	1	1	0	0	0	1	0	1	1	0	1	0	0	0	1	1	0	0	0	1	0	0	0	1	1	1	0	0	0	1	0	0	1	0	0	0	0	0	0	0	0	0	1	-	0	0
S126	1	0	0	1	1	0	0	0	1	0	1	1	0	1	0	0	0	1	1	0	0	0	1	0	0	0	1	1	1	0	0	0	1	0	0	1	0	0	0	0	0	0	0	0	0	1	-	0	0
S126	1	0	0	1	1	0	0	0	1	0	1	1	0	1	0	0	0	1	1	0	0	0	1	0	0	0	1	1	1	0	0	0	1	0	0	1	0	0	0	0	0	0	0	0	0	1	-	0	0
S126	1	1	0	1	1	0	0	0	1	0	1	1	0	0	0	0	0	0	1	0	0	0	1	0	1	1	1	1	1	0	0	0	1	0	0	1	0	0	0	0	0	0	0	0	0	1	1	0	0
S126	1	0	0	0	0	0	1	1	1	1	0	0	1	1	0	1	0	0	0	1	1	1	0	1	0	1	1	0	0	1	1	-	0	1	1	0	0	1	0	0	0	1	0	0	1	0	0	0	0
S126	1	0	0	0	0	0	1	1	1	1	0	0	1	1	0	1	0	0	0	1	1	1	0	1	0	1	1	0	0	1	1	-	0	1	1	0	0	1	0	0	0	1	0	0	1	0	0	0	0
S126	1	0	0	0	0	0	1	1	1	1	0	0	1	1	0	1	0	0	0	1	1	1	0	1	0	1	1	0	0	1	1	-	0	1	1	0	0	1	0	0	0	1	0	0	1	0	0	0	0
S126	1	0	0	0	0	0	1	1	1	1	0	0	1	1	0	1	0	0	0	1	1	1	0	1	0	1	1	0	0	1	1	-	0	1	1	0	0	1	0	0	0	1	0	0	1	0	0	0	0
S126	1	1	1	1	1	0	0	0	1	0	1	0	0	0	0	0	0	1	1	0	0	0	1	0	1	1	1	1	1	0	0	1	1	0	0	1	0	0	0	-	-	0	0	0	0	1	1	0	0
S126	1	1	0	1	0	0	0	0	0	0	1	1	0	1	0	0	0	0	0	0	0	0	1	0	1	1	1	1	0	0	0	0	1	0	0	1	0	0	0	0	1	0	0	0	0	1	0	0	0
S126	0	1	0	1	1	-	0	0	1	0	1	0	0	0	0	0	0	0	1	0	0	0	1	0	1	0	1	1	1	-	0	0	1	0	0	1	0	0	0	-	-	0	0	0	0	1	0	0	0
S126	0	1	0	1	1	-	0	0	1	0	1	0	0	0	0	0	0	0	1	0	0	0	1	0	1	0	1	1	1	-	0	0	1	0	0	1	0	0	0	-	-	0	0	0	0	1	0	0	0
S126	1	1	0	1	1	0	0	0	1	0	1	1	0	1	0	0	0	1	1	0	0	0	1	0	1	1	1	1	1	0	0	1	1	0	0	1	0	0	0	0	1	0	0	0	0	1	1	0	0
S126	1	1	0	1	1	0	0	0	0	0	1	1	0	1	0	0	0	1	1	0	0	0	1	0	1	1	1	1	1	0	0	-	1	0	0	1	0	0	0	-	0	0	0	0	0	1	-	0	0
S126	1	1	0	1	1	0	0	0	1	0	1	1	0	1	-	0	0	0	1	0	0	0	1	0	1	1	1	1	1	0	0	-	0	-	0	1	0	0	0	-	1	-	0	0	0	1	1	0	0
S126	1	1	0	1	0	0	0	0	1	0	1	0	0	1	0	0	0	1	1	0	0	0	1	0	1	0	0	1	1	0	0	0	1	0	0	0	0	0	0	0	0	0	0	0	0	1	0	0	0
S126	1	1	0	1	0	0	0	0	1	0	1	0	0	1	0	0	0	1	1	0	0	0	1	0	1	0	0	1	1	0	0	0	1	0	0	0	0	0	0	0	0	0	0	0	0	1	0	0	0
S126	1	1	0	1	1	0	0	0	1	0	1	1	0	1	0	0	0	1	1	0	0	0	1	0	1	1	1	1	1	0	0	1	1	0	0	1	0	0	0	0	1	0	0	0	0	1	1	0	0
S126	1	1	0	1	1	0	0	0	1	0	1	1	0	1	0	0	0	1	1	0	0	0	1	0	1	1	1	1	1	0	0	1	1	0	0	1	0	0	0	0	0	0	0	0	0	1	0	0	0
S126	1	0	1	1	0	0	0	0	0	0	1	1	0	0	0	0	0	1	1	0	0	0	1	-	1	0	1	1	1	-	0	0	1	0	0	1	0	0	0	-	-	-	0	0	0	1	0	0	0
S126	1	1	0	1	1	0	0	0	1	0	1	1	0	1	0	0	0	0	1	0	0	0	1	0	1	1	1	1	0	0	0	0	1	0	0	1	0	0	0	0	0	0	0	0	0	1	1	0	0
S126	1	1	0	1	1	0	0	0	1	0	1	1	0	1	0	0	0	0	1	0	0	0	1	0	1	1	1	1	0	0	0	0	1	0	0	1	0	0	0	0	0	0	0	0	0	1	1	0	0
S126	1	1	0	1	1	0	0	0	1	0	1	1	0	1	1	0	0	0	1	0	0	0	1	0	1	1	1	1	0	0	0	0	1	0	0	1	0	0	0	0	0	0	0	0	0	1	1	0	0
S126	1	1	0	1	1	0	0	0	0	0	1	1	0	0	0	0	0	0	1	0	0	0	0	0	1	1	1	1	1	0	0	-	1	0	0	1	0	0	0	0	-	0	0	0	0	1	1	0	0
S126 Average	0.942857	0.742857	0.0571429	0.857143	0.771429	0.0322581	0.114286	0.114286	0.885714	0.114286	0.885714	0.742857	0.114286	0.828571	0.0294118	0.114286	0	0.542857	0.828571	0.114286	0.114286	0.114286	0.828571	0.117647	0.714286	0.714286	0.942857	0.885714	0.771429	0.125	0.114286	0.464286	0.857143	0.129032	0.114286	0.8	0	0.114286	0	0	0.259259	0.129032	0	0	0.114286	0.885714	0.483871	0	0
S127	1	1	1	1	1	0	1	1	1	1	1	1	1	1	0	1	0	0	1	1	1	1	1	1	1	0	1	1	1	0	1	0	1	0	1	1	1	1	0	0	1	1	1	0	1	1	0	0	1
S127	1	1	1	1	1	0	1	1	1	1	1	1	1	1	0	1	0	0	1	1	1	1	1	1	1	0	1	1	1	0	1	0	1	0	1	1	1	1	0	0	1	1	1	0	1	1	0	0	1
S127	0	0	0	0	1	0	0	1	1	0	0	0	1	1	0	1	0	0	0	1	0	0	1	0	0	1	1	1	1	1	0	0	0	0	0	0	1	0	1	0	0	0	0	0	1	0	1	0	0
S127 Average	0.666667	0.666667	0.666667	0.666667	1	0	0.666667	1	1	0.666667	0.666667	0.666667	1	1	0	1	0	0	0.666667	1	0.666667	0.666667	1	0.666667	0.666667	0.333333	1	1	1	0.333333	0.666667	0	0.666667	0	0.666667	0.666667	1	0.666667	0.333333	0	0.666667	0.666667	0.666667	0	1	0.666667	0.333333	0	0.666667
S128	0	0	1	1	0	0	0	1	0	0	1	0	1	0	1	0	0	0	0	1	1	0	1	0	0	1	1	0	1	0	1	1	0	1	1	1	0	1	1	0	0	0	0	1	0	1	0	0	0
S128	0	0	1	1	0	1	0	1	0	0	1	0	1	0	1	0	0	0	0	1	1	0	1	0	0	1	1	0	1	0	1	0	0	1	1	0	0	1	1	0	0	0	0	1	0	1	0	0	0
S128	0	0	1	1	0	1	0	1	0	0	1	0	1	0	1	0	0	0	0	1	1	0	1	0	0	1	1	0	1	0	1	1	0	1	1	0	0	1	1	0	0	0	0	1	0	1	0	0	0
S128	0	0	1	1	0	0	0	1	0	0	1	0	1	0	1	0	0	0	0	1	1	0	1	0	0	1	1	0	1	0	1	0	0	1	0	0	0	1	1	-	0	0	0	1	0	1	0	0	0
S128	0	0	1	1	0	1	0	0	0	0	1	0	1	0	1	0	0	0	0	1	1	0	1	0	0	1	1	0	1	0	1	-	0	1	1	0	0	0	1	0	0	0	0	1	0	1	0	0	0
S128	0	0	1	1	0	0	0	1	0	0	1	0	1	0	0	0	0	0	0	1	1	0	1	0	0	1	1	0	1	0	1	1	0	1	1	0	0	1	1	-	0	0	0	1	0	1	0	0	0
S128	0	0	1	1	0	0	0	0	0	0	1	0	1	0	1	0	0	0	0	1	1	0	0	0	0	1	1	0	1	0	0	0	0	0	0	1	0	1	1	0	0	0	0	1	0	1	0	0	0
S128	0	0	1	1	0	0	0	0	0	0	1	0	1	0	1	0	0	0	0	1	1	0	0	0	0	1	1	0	1	0	0	0	0	0	0	1	0	1	1	0	0	0	0	1	0	1	0	0	0
S128	0	0	1	1	0	0	0	0	0	0	1	0	1	0	1	0	0	0	0	1	1	0	0	0	0	1	1	0	1	0	0	0	0	0	0	1	0	1	1	0	0	0	0	1	0	1	0	0	0
S128	0	0	1	1	0	1	0	1	0	0	1	0	1	0	1	0	0	0	0	1	1	0	1	0	0	1	1	0	1	0	1	1	0	1	1	0	0	1	1	-	0	0	0	1	0	1	0	0	0
S128	0	0	1	1	0	1	0	1	0	0	1	0	1	0	1	0	0	0	0	1	1	0	1	0	0	1	1	0	1	0	1	1	0	1	1	0	0	1	1	-	0	0	0	1	0	1	0	0	0
S128	0	0	1	1	0	1	0	1	0	0	1	0	1	0	1	0	0	0	0	1	1	0	1	0	0	1	1	0	1	0	1	1	0	1	1	0	0	1	1	-	0	0	0	1	0	1	0	0	0
S128	0	0	1	1	0	1	0	1	0	0	1	0	1	0	1	0	0	0	0	1	1	0	1	0	0	1	1	0	1	0	1	1	0	1	1	0	0	1	1	0	0	0	0	1	0	1	0	0	0
S128	0	0	1	1	0	1	0	1	0	0	1	0	1	0	1	0	0	0	0	1	1	0	1	0	0	1	1	0	1	0	1	1	0	1	1	0	0	1	1	0	0	0	0	1	0	1	0	0	0
S128	0	0	1	1	0	1	0	1	0	0	1	0	1	0	1	0	0	0	0	1	1	0	1	0	0	1	1	0	1	0	1	1	0	1	1	0	0	1	1	0	0	0	0	1	0	1	0	0	0
S128	0	0	1	1	0	0	0	1	0	0	1	0	1	0	1	0	0	0	0	1	1	0	1	0	0	1	1	0	1	0	1	1	0	1	1	0	0	1	1	0	0	0	0	1	0	1	0	0	0
S128	0	0	1	1	0	1	0	1	0	0	1	0	1	0	1	0	0	0	0	1	1	0	1	0	0	1	1	0	1	0	1	1	0	1	1	0	0	1	1	-	0	0	0	1	0	1	0	0	0
S128	0	0	1	1	0	1	0	1	0	0	1	0	1	0	1	0	0	0	0	0	0	0	1	0	0	1	1	0	0	0	1	0	0	0	1	0	0	0	1	-	0	0	0	0	0	1	0	0	0
S128	0	0	1	1	0	1	0	1	0	0	1	0	1	0	1	0	0	0	0	1	1	0	1	0	0	1	1	0	1	0	1	1	0	1	1	0	0	1	1	-	0	0	0	1	0	1	0	0	0
S128	0	0	1	1	0	1	0	1	0	0	1	0	1	0	1	0	0	0	0	1	1	0	1	0	0	0	1	0	1	0	1	0	0	0	1	0	0	1	1	0	-	0	0	1	0	1	-	0	0
S128 Average	0	0	1	1	0	0.65	0	0.8	0	0	1	0	1	0	0.95	0	0	0	0	0.95	0.95	0	0.85	0	0	0.95	1	0	0.95	0	0.85	0.631579	0	0.75	0.8	0.2	0	0.9	1	0	0	0	0	0.95	0	1	0	0	0
S129	0	0	0	0	1	0	0	1	0	0	0	0	1	1	0	1	0	0	0	1	0	0	1	0	0	1	1	0	1	0	0	0	0	0	1	0	0	0	1	0	0	0	1	0	1	0	1	0	0
S129	0	0	0	0	0	0	0	1	1	0	0	0	1	0	-	1	0	0	0	1	0	0	1	0	0	1	1	0	1	1	0	0	0	0	1	0	0	0	1	0	-	0	1	0	1	0	0	0	0
S129	0	0	0	0	1	0	0	1	0	0	0	0	1	1	0	1	0	0	0	0	0	0	1	0	0	1	1	0	1	1	0	0	0	0	1	0	0	0	1	0	0	0	1	0	0	0	0	0	0
S129	0	0	0	0	1	0	0	1	1	0	0	0	1	1	0	1	0	0	0	1	0	0	1	0	0	1	1	0	1	1	0	0	0	0	1	0	1	0	1	1	0	0	1	0	1	0	1	0	0
S129	0	0	0	0	1	0	0	1	0	0	0	0	1	1	0	1	0	0	0	0	0	0	1	0	0	1	1	0	1	1	0	0	0	0	1	0	0	0	1	0	0	0	1	0	0	0	0	0	0
S129	0	0	0	0	1	0	0	1	1	0	0	0	1	1	0	1	0	0	0	1	0	0	1	0	0	1	1	0	1	1	0	0	0	0	1	0	1	0	1	1	0	0	1	0	1	0	1	0	0
S129	0	0	0	0	1	0	0	1	1	0	0	0	1	1	0	1	0	0	0	1	0	0	1	0	0	1	1	0	1	0	0	0	0	0	1	0	1	0	1	0	0	0	1	0	1	0	0	0	0
S129 Average	0	0	0	0	0.857143	0	0	1	0.571429	0	0	0	1	0.857143	0	1	0	0	0	0.714286	0	0	1	0	0	1	1	0	1	0.714286	0	0	0	0	1	0	0.428571	0	1	0.285714	0	0	1	0	0.714286	0	0.428571	0	0
S131	0	0	1	0	1	1	0	0	0	1	0	0	1	1	1	1	0	0	0	0	1	1	0	0	1	0	0	0	1	1	0	0	0	1	0	0	0	1	0	0	0	0	0	0	0	0	0	0	1
S131	0	0	1	0	1	0	0	1	0	0	0	1	1	1	-	1	1	0	0	0	1	1	0	0	1	0	0	0	1	1	0	0	0	1	0	0	0	1	0	-	-	0	0	0	0	0	0	0	1
S131	0	0	1	0	1	0	0	1	0	0	0	1	1	1	-	1	1	0	0	0	1	1	0	0	1	0	0	0	1	1	0	0	0	1	0	0	0	1	0	-	-	0	0	0	0	0	0	0	1
S131	0	0	1	0	1	0	0	1	0	0	0	1	1	1	-	1	1	0	0	0	1	1	0	0	1	0	0	0	1	1	0	0	0	1	0	0	0	1	0	-	-	0	0	0	0	0	0	0	1
S131	0	0	1	0	1	0	0	1	0	0	0	1	1	1	-	1	1	0	0	0	1	1	0	0	1	0	0	0	1	1	0	0	0	1	0	0	0	1	0	-	-	0	0	0	0	0	0	0	1
S131	1	0	0	1	1	1	1	0	0	1	1	0	0	1	1	1	0	1	0	1	0	0	0	0	-	0	0	0	0	1	0	0	0	1	0	1	0	1	1	-	0	0	1	1	0	1	-	0	0
S131	0	0	1	0	0	1	0	1	0	1	0	1	1	1	0	1	1	0	0	0	1	1	0	0	1	0	0	0	1	1	0	0	0	0	0	0	0	1	0	1	0	-	0	0	0	0	0	0	1
S131	0	0	1	0	1	0	0	1	0	1	0	1	1	1	1	1	1	0	0	0	1	1	0	0	1	0	0	0	1	1	0	0	0	1	0	0	0	1	0	0	0	0	0	0	0	0	0	0	1
S131 Average	0.125	0	0.875	0.125	0.875	0.375	0.125	0.75	0	0.5	0.125	0.75	0.875	1	0.75	1	0.75	0.125	0	0.125	0.875	0.875	0	0	1	0	0	0	0.875	1	0	0	0	0.875	0	0.125	0	1	0.125	0.333333	0	0	0.125	0.125	0	0.125	0	0	0.875
S132	0	1	0	0	1	1	1	1	1	1	1	1	1	0	0	1	1	1	1	0	1	0	0	1	1	0	1	1	1	0	0	0	1	0	0	0	1	0	0	0	0	1	0	1	0	1	-	0	1
S132	0	1	-	0	1	0	1	1	1	1	1	1	1	0	0	1	1	1	0	0	1	0	0	1	1	0	1	1	1	0	0	-	1	0	0	0	1	0	0	0	0	1	0	0	0	1	0	0	1
S132	0	1	-	0	1	0	1	1	1	1	1	1	1	0	0	1	1	1	0	0	1	0	0	1	1	0	1	1	1	0	0	-	1	0	0	0	1	0	0	0	0	1	0	0	0	1	0	0	1
S132	0	1	-	0	1	0	1	1	1	1	1	1	1	0	0	1	1	1	0	0	1	0	0	1	1	0	1	1	1	0	0	-	1	0	0	0	1	0	0	0	0	1	0	0	0	1	0	0	1
S132	0	1	-	0	1	0	1	1	1	1	1	1	1	0	0	1	1	1	0	0	1	0	0	1	1	0	1	1	1	0	0	-	1	0	0	0	1	0	0	0	0	1	0	0	0	1	0	0	1
S132	0	1	0	0	1	0	1	1	1	1	1	1	1	0	0	1	0	0	0	0	1	0	0	0	1	0	1	1	1	0	0	0	1	0	0	0	0	0	0	-	0	1	0	1	0	1	0	1	1
S132	0	1	0	0	1	0	1	1	1	1	1	1	1	0	0	1	0	0	0	0	1	0	0	0	1	0	1	1	1	0	0	0	1	0	0	0	0	0	0	-	0	1	0	1	0	1	0	1	1
S132	0	1	0	0	1	1	1	1	1	1	1	1	1	0	0	1	1	1	1	0	1	0	0	1	1	0	1	1	1	0	0	1	1	0	0	0	1	0	0	1	0	1	0	1	0	1	0	1	1
S132	0	0	0	0	0	0	1	0	1	1	1	0	1	0	0	1	0	0	1	0	1	0	0	1	1	0	1	1	1	0	0	1	1	0	0	0	1	0	0	1	0	1	0	1	0	1	-	1	1
S132	0	1	0	0	1	1	1	1	1	1	1	1	1	0	0	1	1	1	1	0	1	0	0	1	1	0	1	1	1	0	0	1	1	0	0	0	1	0	0	0	0	1	0	1	0	1	0	1	1
S132	0	1	0	0	1	1	1	1	1	1	1	1	1	0	0	1	1	1	1	0	1	0	0	1	1	0	1	1	1	0	0	1	1	0	0	0	1	0	0	0	0	1	0	1	0	1	0	1	1
S132	0	1	0	0	1	1	1	1	1	1	1	1	1	0	0	1	1	1	1	0	1	0	0	1	1	0	1	1	1	0	0	1	1	0	0	0	1	0	0	0	0	1	0	1	0	1	0	1	1
S132	0	1	0	0	1	1	1	1	1	1	1	1	1	0	0	1	1	1	1	0	1	0	0	1	1	0	1	1	1	0	0	1	1	0	0	0	1	0	0	0	0	1	0	1	0	1	0	1	1
S132	0	1	0	0	1	1	1	1	1	1	1	0	1	0	0	1	1	1	1	0	1	0	0	1	1	0	1	1	1	0	0	0	1	0	0	0	1	0	0	-	0	1	0	1	0	1	0	1	1
S132	0	1	0	0	1	1	1	1	1	1	1	0	1	0	0	1	1	1	1	0	1	0	0	1	1	0	1	1	1	0	0	0	1	0	0	0	1	0	0	-	0	1	0	1	0	1	0	1	1
S132	0	1	0	0	1	0	1	1	0	1	1	1	1	0	0	1	1	1	1	0	0	0	0	1	0	0	1	1	1	0	0	1	1	-	0	0	1	0	0	0	-	0	0	1	0	1	0	1	1
S132	0	1	0	0	1	1	1	1	1	1	1	1	1	0	0	0	1	1	0	0	1	0	0	1	1	0	1	1	1	0	0	1	1	0	0	0	1	0	0	-	0	1	0	1	0	1	0	1	1
S132	0	1	0	0	1	1	1	1	1	1	1	1	1	0	0	0	1	1	0	0	1	0	0	1	1	0	1	1	1	0	0	1	1	0	0	0	1	0	0	-	0	1	0	1	0	1	0	1	1
S132 Average	0	0.944444	0	0	0.944444	0.555556	1	0.944444	0.944444	1	1	0.833333	1	0	0	0.888889	0.833333	0.833333	0.555556	0	0.944444	0	0	0.888889	0.944444	0	1	1	1	0	0	0.642857	1	0	0	0	0.888889	0	0	0.166667	0	0.944444	0	0.777778	0	1	0	0.722222	1
S135	0	0	0	1	1	0	0	0	0	1	1	0	0	0	1	0	1	0	0	0	1	0	0	0	1	1	0	1	0	0	1	1	1	0	0	1	0	0	0	0	0	0	0	1	0	1	0	0	1
S135	0	0	0	1	1	1	0	0	0	1	1	1	0	0	1	1	1	0	0	0	1	0	1	0	0	1	0	1	0	0	1	1	1	0	1	1	0	0	0	0	0	0	0	1	0	1	0	0	1
S135	0	0	0	1	1	1	0	0	0	1	1	1	0	0	1	1	1	0	0	0	1	0	1	0	1	1	0	1	0	0	1	1	1	0	1	1	0	0	0	1	0	0	0	1	0	1	0	0	1
S135	0	-	0	1	0	1	0	0	0	1	1	1	0	0	1	1	1	-	0	0	1	0	1	0	1	-	0	1	0	0	0	0	1	-	1	1	0	0	0	0	0	0	0	1	0	0	0	0	1
S135	0	0	0	1	1	1	0	0	0	0	1	1	0	0	-	1	1	0	0	0	1	0	1	0	0	0	0	1	0	0	0	-	1	0	0	1	0	0	0	0	0	0	0	0	0	1	0	0	0
S135	0	0	0	1	1	1	0	0	0	0	1	1	0	0	-	1	1	0	0	0	1	0	1	0	0	0	0	1	0	0	0	-	1	0	0	1	0	0	0	0	0	0	0	0	0	1	0	0	0
S135	0	0	0	1	1	1	0	0	0	1	1	1	0	0	0	1	1	0	0	0	1	0	1	0	0	1	0	1	0	0	1	1	1	0	1	1	0	0	0	1	-	0	0	1	0	1	0	0	1
S135	0	0	0	1	1	1	0	0	0	1	1	1	0	0	1	1	1	0	0	0	1	0	1	0	1	1	0	1	0	0	1	1	1	0	1	1	0	0	0	1	0	0	0	1	0	1	0	0	1
S135	0	0	0	1	0	1	0	0	0	1	1	1	0	0	1	1	1	0	0	0	1	0	1	0	1	1	0	1	0	0	1	1	0	0	1	1	0	0	0	0	0	0	0	1	0	0	0	0	1
S135	0	0	0	1	1	1	0	0	0	1	1	1	0	0	0	1	1	0	0	0	1	0	1	0	1	1	0	1	0	0	1	1	1	0	1	1	0	0	0	0	-	0	0	1	0	1	0	0	1
S135	0	0	0	1	1	1	0	0	0	1	1	1	0	0	0	1	1	0	0	0	1	0	1	0	1	1	0	1	0	0	1	1	1	0	1	1	0	0	0	0	-	0	0	1	0	1	0	0	1
S135	0	0	0	1	1	1	0	0	0	1	1	0	0	0	1	1	0	0	0	0	1	0	1	0	0	0	0	1	0	0	1	0	1	0	1	1	0	0	0	-	0	0	0	1	0	1	0	0	1
S135	0	0	0	1	0	1	0	0	0	1	1	1	0	0	1	1	1	0	0	0	1	0	1	0	1	1	0	1	0	0	1	1	0	0	1	1	0	0	0	0	0	0	0	1	0	0	0	0	1
S135	0	0	0	1	0	1	0	0	0	1	1	1	0	0	1	1	1	0	0	0	1	0	1	0	1	1	0	1	0	0	1	1	0	0	1	1	0	0	0	-	-	0	0	1	0	0	0	0	1
S135	0	0	0	1	1	1	0	0	0	1	1	1	0	0	1	1	1	0	0	0	1	0	1	0	1	1	0	1	0	0	1	1	1	0	1	1	0	0	0	-	-	0	0	1	0	1	0	0	1
S135	0	0	0	1	1	0	0	0	0	1	1	1	0	0	1	1	1	0	0	0	1	0	1	0	1	1	0	1	0	0	1	1	1	0	1	1	0	0	0	1	0	0	0	1	0	1	0	0	1
S135	0	0	0	1	0	0	0	0	0	1	1	1	0	0	1	1	1	0	0	0	1	0	1	0	1	1	0	1	0	0	1	1	0	0	1	1	0	0	0	0	0	0	0	1	0	0	0	0	1
S135	0	0	0	1	1	0	0	0	0	1	1	1	0	0	1	1	1	0	0	0	1	0	1	0	1	1	0	1	0	0	1	1	1	0	1	1	0	0	0	1	0	0	0	1	0	1	0	0	1
S135	0	0	0	1	1	1	0	0	0	1	1	1	0	0	1	1	1	0	0	0	1	0	1	0	1	1	0	1	0	0	1	1	1	0	1	1	0	0	0	1	0	0	0	1	0	1	0	0	1
S135	0	0	0	1	1	1	0	0	0	1	1	1	0	0	1	1	1	0	0	0	1	0	1	0	1	1	0	1	0	0	1	1	1	0	1	1	0	0	0	1	0	0	0	1	0	1	0	0	1
S135	0	0	0	1	1	-	0	0	0	1	1	1	0	0	0	1	1	0	0	0	1	0	1	0	1	1	0	1	0	0	1	-	1	-	1	1	0	0	0	0	0	0	0	1	0	1	0	-	1
S135	0	0	0	1	1	-	0	0	0	1	1	1	0	0	0	1	1	0	0	0	1	0	1	0	1	1	0	1	0	0	1	-	1	-	1	1	0	0	0	0	0	0	0	1	0	1	0	-	1
S135	0	0	0	1	0	1	0	0	0	1	1	1	0	0	1	1	1	0	0	0	1	0	1	0	1	1	0	1	0	0	1	1	0	0	1	1	0	0	0	0	0	0	0	1	0	0	0	0	1
S135	0	0	0	1	0	1	0	0	0	1	1	1	0	0	1	1	1	0	0	0	1	0	1	0	1	1	0	1	0	0	1	1	0	0	1	1	0	0	0	0	0	0	0	1	0	0	0	0	1
S135 Average	0	0	0	1	0.708333	0.818182	0	0	0	0.916667	1	0.916667	0	0	0.772727	0.958333	0.958333	0	0	0	1	0	0.958333	0	0.791667	0.869565	0	1	0	0	0.875	0.9	0.75	0	0.875	1	0	0	0	0.333333	0	0	0	0.916667	0	0.708333	0	0	0.916667
S136	0	1	1	0	0	0	0	0	1	1	0	1	0	1	1	0	1	-	1	0	1	0	0	1	0	1	0	0	0	0	0	0	1	1	0	0	1	1	0	0	0	1	0	0	1	0	0	0	1
S136	0	1	1	0	0	0	0	0	1	1	0	1	0	1	1	0	1	-	1	0	1	0	0	1	0	1	0	0	0	0	0	0	1	1	0	0	1	1	0	0	0	1	0	0	1	0	0	0	1
S136 Average	0	1	1	0	0	0	0	0	1	1	0	1	0	1	1	0	1	#DIV/0!	1	0	1	0	0	1	0	1	0	0	0	0	0	0	1	1	0	0	1	1	0	0	0	1	0	0	1	0	0	0	1
S137	0	0	1	0	1	0	0	1	1	0	0	0	1	1	0	1	0	0	0	1	0	0	1	0	0	1	1	1	1	1	0	0	0	0	0	0	1	0	1	1	0	1	0	0	1	0	1	0	0
S137	0	0	1	0	1	0	0	1	1	0	0	0	1	1	0	1	0	0	0	1	0	0	1	0	0	1	1	1	1	1	0	0	0	0	0	0	1	0	1	0	0	1	0	0	1	0	1	0	0
S137	0	0	1	0	1	0	0	1	1	0	0	0	0	1	0	1	0	0	0	1	0	0	1	0	0	1	1	1	1	1	0	0	0	0	0	0	1	0	1	0	-	1	0	0	1	0	0	0	0
S137	0	0	1	0	1	0	0	1	1	0	0	0	0	1	0	1	0	0	0	1	0	0	1	0	0	1	1	1	1	1	0	0	0	0	0	0	1	0	1	0	-	1	0	0	1	0	0	0	0
S137	0	0	1	0	1	0	0	1	1	0	0	0	1	1	0	1	0	0	0	1	0	0	1	0	0	0	1	1	1	0	0	0	0	-	0	0	1	0	1	0	0	1	0	0	1	0	1	0	0
S137 Average	0	0	1	0	1	0	0	1	1	0	0	0	0.6	1	0	1	0	0	0	1	0	0	1	0	0	0.8	1	1	1	0.8	0	0	0	0	0	0	1	0	1	0.2	0	1	0	0	1	0	0.6	0	0
S138	0	0	0	1	0	1	0	0	0	1	1	1	0	0	1	1	1	0	0	0	1	0	1	0	1	1	0	1	0	0	1	1	0	0	1	1	0	0	0	0	-	0	0	1	0	0	1	0	1
S138	0	0	0	1	1	1	0	0	0	1	1	1	0	0	1	1	1	0	0	0	1	0	1	0	1	1	0	1	0	0	1	1	1	0	1	1	0	0	0	1	0	0	0	1	0	1	1	0	1
S138	0	0	0	1	1	1	0	0	0	1	1	0	0	0	1	1	1	0	0	0	1	0	1	0	1	1	0	1	0	0	1	0	1	0	1	1	0	0	0	1	0	0	0	1	0	1	1	0	1
S138	0	0	0	1	1	0	0	0	0	1	1	1	0	0	1	1	1	0	0	0	1	0	1	0	1	1	0	1	0	0	1	1	1	0	1	1	0	0	0	0	0	0	0	1	0	1	0	0	1
S138	0	0	0	1	1	0	0	0	0	1	1	1	0	0	1	1	1	0	0	0	1	0	1	0	1	1	0	1	0	0	1	1	1	0	1	1	0	0	0	0	0	0	0	1	0	1	0	0	1
S138	0	0	0	1	1	1	0	0	0	1	1	1	0	0	1	1	1	0	0	0	1	0	1	0	1	1	0	1	0	0	1	1	1	0	1	1	0	0	0	1	0	0	0	1	0	1	1	0	1
S138	0	0	0	1	1	1	0	0	0	1	1	1	0	0	1	1	1	0	0	0	1	0	1	0	1	1	0	1	0	0	1	1	1	0	1	1	0	0	0	1	0	0	0	1	0	1	1	0	1
S138	0	0	0	1	1	1	0	0	0	1	1	1	0	0	0	1	1	0	0	0	1	0	1	0	1	1	0	1	0	0	1	1	1	0	1	0	0	0	0	0	0	0	0	1	0	1	1	0	1
S138	0	0	0	1	1	1	0	0	0	1	1	1	0	0	1	1	1	0	0	0	1	0	1	0	1	1	0	1	0	0	1	0	1	0	1	0	0	0	0	0	0	0	0	0	0	1	0	0	0
S138	0	0	0	1	1	1	0	0	0	1	1	1	0	0	1	1	1	0	0	0	1	0	1	0	1	1	0	1	0	0	1	0	1	0	1	0	0	0	0	0	0	0	0	0	0	1	0	0	0
S138	0	0	0	1	1	0	0	0	0	1	1	1	0	0	0	1	1	0	0	0	1	0	1	0	1	1	0	1	0	0	1	1	0	0	0	1	0	0	0	0	0	0	0	1	0	1	0	0	1
S138	0	0	0	1	1	0	0	0	0	1	1	1	0	0	0	1	1	0	0	0	1	0	1	0	1	1	0	1	0	0	1	1	0	0	0	1	0	0	0	0	0	0	0	1	0	1	0	0	1
S138	0	0	0	1	1	1	0	0	0	1	1	1	0	0	1	1	1	0	0	0	1	0	1	0	1	1	0	1	0	0	1	0	1	0	1	1	0	0	0	0	0	0	0	1	0	1	-	0	1
S138 Average	0	0	0	1	0.923077	0.692308	0	0	0	1	1	0.923077	0	0	0.769231	1	1	0	0	0	1	0	1	0	1	1	0	1	0	0	1	0.692308	0.769231	0	0.846154	0.769231	0	0	0	0.307692	0	0	0	0.846154	0	0.923077	0.5	0	0.846154
S139	0	0	0	1	1	0	1	0	1	1	1	1	0	0	1	0	1	0	0	0	1	0	1	1	1	0	0	1	0	0	1	1	1	0	1	1	0	0	0	0	0	0	0	1	0	1	0	0	1
S139	0	0	0	1	1	1	1	0	1	1	1	1	0	0	1	0	1	0	0	0	1	0	1	1	1	0	0	1	0	0	1	1	1	0	1	1	0	0	0	1	0	0	0	1	0	1	0	0	1
S139	0	0	0	1	1	1	1	0	1	1	1	1	0	0	1	0	1	0	0	0	1	0	1	1	1	0	0	1	0	0	1	1	1	0	1	1	0	0	0	1	0	0	0	1	0	1	0	0	1
S139	0	0	0	1	0	1	1	1	1	1	1	1	0	0	1	0	1	0	0	0	1	0	1	1	1	0	1	1	0	0	1	0	0	0	1	1	1	0	-	0	0	0	0	1	0	0	1	0	1
S139	0	0	0	1	0	1	1	0	1	1	1	1	0	0	1	0	1	0	0	0	1	0	1	1	1	0	0	1	0	0	1	0	0	0	1	1	0	0	0	0	0	0	0	1	0	0	1	0	1
S139	0	0	0	1	0	0	1	0	1	1	1	1	0	0	1	0	1	0	0	0	1	0	1	1	1	0	0	1	0	0	1	1	0	0	1	1	0	0	0	-	-	0	0	1	0	0	1	0	1
S139	0	0	0	1	0	0	1	0	1	1	1	1	0	0	1	0	1	0	0	0	1	0	1	1	1	0	0	1	0	0	1	1	0	0	1	1	0	0	0	-	-	0	0	1	0	0	1	0	1
S139	0	0	0	1	1	1	1	0	1	1	1	1	0	0	1	0	1	0	0	0	1	0	1	1	1	0	0	1	0	0	1	1	1	0	1	1	0	0	0	1	0	0	0	1	0	1	1	0	1
S139	0	0	-	1	1	1	0	0	1	1	1	1	0	0	-	0	1	0	0	0	1	0	0	1	0	0	0	1	0	0	1	-	1	-	1	1	0	1	0	-	0	-	0	1	0	1	0	-	1
S139	0	0	0	1	1	0	1	-	1	1	1	1	0	0	0	0	1	0	0	0	1	0	1	1	1	0	0	0	0	0	1	-	1	0	1	1	0	0	0	-	0	0	0	1	0	1	-	0	1
S139	0	0	0	1	1	0	1	-	1	1	1	1	0	0	0	0	1	0	0	0	1	0	1	1	1	0	0	0	0	0	1	-	1	0	1	1	0	0	0	-	0	0	0	1	0	1	-	0	1
S139	0	0	0	1	1	0	1	-	1	1	1	1	0	0	0	0	1	0	0	0	1	0	1	1	1	0	0	0	0	0	1	-	1	0	1	1	0	0	0	-	0	0	0	1	0	1	-	0	1
S139	0	0	0	1	1	1	1	0	1	1	1	1	0	0	1	0	1	0	0	0	1	0	1	1	1	0	0	1	0	0	1	1	1	0	1	1	0	0	0	1	0	0	0	1	0	1	1	0	1
S139	0	0	0	1	1	1	1	0	1	1	1	1	0	0	1	0	1	0	0	0	1	0	0	1	1	0	0	1	0	0	1	0	1	0	1	1	0	0	0	0	0	0	0	1	0	1	1	0	1
S139	0	0	0	1	0	1	1	0	1	1	1	1	0	0	1	0	1	0	0	0	1	0	0	1	1	0	0	1	0	0	1	0	0	0	1	1	0	0	0	0	0	0	0	1	0	0	1	0	1
S139	0	0	0	1	1	0	1	0	1	1	1	0	0	0	1	0	1	0	0	0	1	0	1	0	1	0	0	1	0	0	1	0	1	0	1	1	0	0	0	0	0	0	0	1	0	1	-	0	1
S139	0	0	0	1	1	1	1	0	1	1	1	1	0	0	1	0	0	0	0	0	1	0	1	1	1	0	0	1	0	0	1	0	1	0	1	1	0	0	0	1	0	0	0	1	0	0	1	0	1
S139	0	0	0	1	0	1	1	0	1	1	1	1	0	0	1	0	0	0	0	0	1	0	1	1	1	0	0	1	0	0	1	0	0	0	1	1	0	0	0	0	0	0	0	1	0	0	1	0	1
S139	0	0	-	1	1	0	1	0	1	1	1	1	0	0	0	0	1	0	0	0	1	0	1	1	1	0	0	1	0	0	1	0	1	0	1	1	0	0	0	0	0	0	0	1	0	1	0	0	1
S139 Average	0	0	0	1	0.684211	0.578947	0.947368	0.0625	1	1	1	0.947368	0	0	0.777778	0	0.894737	0	0	0	1	0	0.842105	0.947368	0.947368	0	0.0526316	0.842105	0	0	1	0.466667	0.684211	0	1	1	0.0526316	0.0526316	0	0.384615	0	0	0	1	0	0.631579	0.666667	0	1
S141	0	0	1	1	0	1	0	0	0	0	1	1	0	1	1	1	1	0	0	0	0	1	0	0	0	1	1	1	0	1	1	1	0	0	0	0	0	1	0	0	0	1	0	0	0	0	1	0	0
S141	0	0	1	1	0	0	0	0	0	0	1	1	0	1	1	1	1	0	0	0	0	1	0	0	0	1	1	1	0	1	1	1	0	0	0	0	0	1	0	0	0	1	0	0	0	0	1	0	0
S141	0	0	1	1	0	1	0	0	0	0	1	1	0	1	1	1	1	0	0	0	0	1	0	0	0	1	1	1	0	1	1	-	1	0	0	0	0	1	0	0	0	1	0	0	1	1	1	0	0
S141	0	0	1	1	0	1	0	0	0	0	1	1	0	1	1	1	1	0	0	0	0	1	0	0	0	1	1	1	0	1	1	1	0	0	0	0	0	1	0	0	0	1	0	0	0	0	1	0	0
S141	0	0	1	1	0	1	0	0	0	0	1	1	0	1	1	1	1	0	0	0	0	1	0	0	0	1	1	1	0	1	1	1	0	0	0	0	0	1	0	0	0	1	0	0	0	0	1	0	0
S141	0	0	1	1	0	1	0	0	0	0	1	1	0	0	0	1	1	0	0	0	0	1	0	0	0	1	1	1	0	1	1	1	1	0	0	0	0	1	0	0	0	1	0	0	1	1	1	0	0
S141	0	0	1	1	0	1	0	0	0	0	1	1	0	0	0	1	1	0	0	0	0	1	0	0	0	1	1	1	0	1	1	1	0	0	0	0	0	1	0	0	0	1	0	0	0	0	1	0	0
S141	0	0	1	1	0	1	0	0	0	0	1	0	0	1	1	1	1	0	0	0	0	1	0	0	0	1	1	1	0	1	1	1	1	0	0	0	0	1	0	1	-	1	0	0	1	1	1	0	0
S141	0	0	1	1	0	1	0	0	0	0	1	1	0	1	1	1	1	0	0	0	0	1	0	0	0	1	1	1	0	1	1	0	0	0	0	0	0	1	0	0	0	1	0	0	0	0	1	0	0
S141	0	0	1	1	0	0	0	0	0	0	1	1	0	1	0	1	1	0	0	0	0	1	0	0	0	1	1	1	0	1	1	1	1	0	0	0	0	1	0	1	0	1	0	0	1	1	1	0	0
S141	0	0	1	1	0	0	0	0	0	0	1	1	0	1	0	1	1	0	0	0	0	1	0	0	0	1	1	1	0	1	1	1	1	0	0	0	0	1	0	1	0	1	0	0	1	1	1	0	0
S141	0	0	1	1	0	1	0	0	0	0	1	0	0	1	1	1	1	0	0	0	0	1	0	0	0	1	1	1	0	1	1	0	0	0	0	0	0	1	0	1	-	0	0	0	1	1	0	0	0
S141	0	0	1	1	0	1	0	0	0	0	1	1	0	1	1	1	1	0	0	0	0	1	0	0	0	1	1	1	0	1	1	1	1	0	0	0	0	1	0	1	0	1	0	0	1	1	1	0	0
S141	0	0	1	1	0	1	0	0	0	0	1	1	0	1	1	1	1	0	0	0	0	1	0	0	0	1	1	1	0	1	1	1	1	0	0	0	0	1	0	1	0	1	0	0	1	1	1	0	0
S141	0	0	1	1	0	1	0	0	0	0	1	1	0	1	1	1	1	0	0	0	0	1	0	0	0	1	1	1	0	1	1	1	1	0	0	0	0	1	0	1	0	1	0	0	1	1	1	0	0
S141	0	0	1	1	0	1	0	0	0	0	1	1	0	1	1	1	1	0	0	0	0	1	0	0	0	1	1	1	0	1	1	1	1	0	0	0	0	1	0	1	0	1	0	0	1	1	1	0	0
S141	0	0	1	1	0	1	0	0	0	0	1	1	0	1	1	1	1	0	0	0	0	1	0	0	0	1	1	1	0	1	1	1	1	0	0	0	0	1	0	1	0	1	0	0	1	1	1	0	0
S141	0	0	1	1	0	1	0	0	0	0	1	1	0	1	1	1	1	0	0	0	0	1	0	0	0	1	1	1	0	1	1	1	1	0	0	0	0	1	0	1	0	1	0	0	1	1	1	0	0
S141	0	0	1	1	0	1	0	0	0	0	1	1	0	1	1	1	1	0	0	0	0	1	0	0	0	1	1	1	0	1	1	1	1	0	0	0	0	1	0	1	0	1	0	0	1	1	1	0	0
S141	0	0	1	1	0	1	0	0	0	0	1	1	0	1	1	1	1	0	0	0	0	1	0	0	0	1	1	1	0	1	1	1	1	0	0	0	0	1	0	1	0	1	0	0	1	1	1	0	0
S141	0	0	1	1	0	1	0	0	0	0	1	1	0	1	1	1	1	0	0	0	0	1	0	0	0	1	1	1	0	1	1	1	1	0	0	0	0	1	0	1	0	1	0	0	1	1	1	0	0
S141	0	0	1	1	0	1	0	0	0	0	1	1	0	1	1	1	1	0	0	0	0	1	0	0	0	1	1	1	0	1	1	1	1	0	0	0	0	1	0	1	0	1	0	0	1	1	1	0	0
S141	0	0	1	1	0	1	0	0	0	0	1	1	0	1	1	1	1	0	0	0	0	1	0	0	0	1	1	1	0	1	1	0	1	0	0	0	0	1	0	1	0	1	0	0	1	1	1	0	0
S141	0	0	1	1	0	1	0	0	0	0	1	1	0	1	1	1	1	0	0	0	0	1	0	0	0	1	1	1	0	1	1	0	1	0	0	0	0	1	0	-	-	1	0	0	1	1	1	0	0
S141	0	0	1	1	0	1	0	0	0	0	1	1	0	1	1	1	1	0	0	0	0	1	0	0	0	1	1	1	0	1	1	0	1	0	0	0	0	1	0	-	-	1	0	0	1	1	1	0	0
S141 Average	0	0	1	1	0	0.88	0	0	0	0	1	0.92	0	0.92	0.84	1	1	0	0	0	0	1	0	0	0	1	1	1	0	1	1	0.791667	0.72	0	0	0	0	1	0	0.652174	0	0.96	0	0	0.76	0.76	0.96	0	0
S145	0	0	0	1	1	0	0	-	0	0	1	0	1	1	0	0	0	-	1	1	1	1	0	0	1	0	1	1	0	0	1	-	1	1	1	1	0	1	0	-	-	1	1	1	0	1	-	0	1
S145	0	0	0	1	1	0	0	-	0	0	1	0	1	1	0	0	0	-	1	1	1	1	0	0	1	0	1	1	0	0	1	-	1	1	1	1	0	1	0	-	-	1	1	1	0	1	-	0	1
S145	1	1	1	0	0	0	0	1	0	0	0	1	1	0	1	0	1	0	0	1	1	0	0	0	0	0	1	0	1	1	0	-	0	1	0	1	-	0	0	-	0	0	0	0	0	0	0	-	1
S145	1	1	1	0	0	0	0	1	0	0	0	1	1	0	1	0	1	0	0	1	1	0	0	0	0	0	1	0	1	1	0	-	0	1	0	1	-	0	0	-	0	0	0	0	0	0	0	-	1
S145	1	1	1	1	0	1	0	1	1	0	1	1	1	0	1	1	1	0	0	1	1	1	0	1	1	1	1	1	1	1	1	-	1	1	1	1	-	0	0	-	0	1	1	1	1	0	0	-	1
S145	1	1	1	0	0	0	0	1	0	0	0	1	1	0	1	0	1	0	0	1	1	0	0	0	0	0	1	0	1	1	0	-	0	1	0	1	-	0	0	-	0	0	0	0	0	0	0	-	1
S145 Average	0.666667	0.666667	0.666667	0.5	0.333333	0.166667	0	1	0.166667	0	0.5	0.666667	1	0.333333	0.666667	0.166667	0.666667	0	0.333333	1	1	0.5	0	0.166667	0.5	0.166667	1	0.5	0.666667	0.666667	0.5	#DIV/0!	0.5	1	0.5	1	0	0.333333	0	#DIV/0!	0	0.5	0.5	0.5	0.166667	0.333333	0	0	1
S146	0	0	1	1	1	0	1	0	0	0	1	1	1	0	0	0	0	0	0	0	0	0	1	0	1	1	0	0	1	0	1	-	1	0	1	0	0	0	-	-	0	-	1	0	0	0	-	1	0
S146	0	1	1	1	0	0	1	0	0	0	1	1	1	0	0	0	0	0	0	0	0	0	1	0	0	1	0	0	1	0	1	0	1	0	1	0	0	0	0	-	1	0	0	0	0	0	-	0	0
S146	0	1	1	1	0	0	1	0	0	0	1	0	1	0	0	0	0	0	0	0	0	0	1	0	1	1	0	0	1	0	1	1	1	0	1	0	0	0	0	0	1	0	0	0	0	0	0	1	0
S146	0	1	1	1	1	0	1	0	0	0	1	1	1	0	0	0	0	0	0	0	0	0	1	0	1	1	0	0	1	0	1	1	1	0	1	0	0	0	0	0	1	0	1	0	0	0	0	1	0
S146	0	1	1	1	1	0	1	0	0	0	1	1	1	0	0	0	0	0	0	0	0	0	1	0	1	1	0	0	1	0	1	1	1	0	1	0	0	0	0	0	1	0	1	0	0	0	0	1	0
S146	0	1	1	1	0	0	1	0	0	0	1	1	1	0	0	0	0	0	0	0	0	0	1	0	1	1	0	0	1	0	1	1	1	0	1	0	0	0	0	0	1	0	0	0	0	0	0	1	0
S146	0	1	1	1	1	0	1	0	0	0	1	1	1	0	0	0	0	0	0	0	0	0	1	0	1	1	0	0	1	0	1	1	1	0	1	0	0	0	0	0	1	0	1	0	0	0	0	1	0
S146	0	1	1	1	1	0	1	0	0	0	1	1	1	0	0	0	0	0	0	0	0	0	1	0	1	1	0	0	1	0	1	1	1	0	1	0	0	0	0	0	1	0	1	0	0	0	0	1	0
S146	1	1	0	0	0	0	0	0	1	1	1	1	0	0	0	1	0	0	0	1	1	0	1	0	1	1	1	1	1	0	1	1	1	0	1	1	0	1	0	1	0	0	0	1	0	0	0	0	1
S146	1	1	0	0	1	0	0	0	1	1	1	1	0	0	0	1	0	0	0	1	1	0	1	0	1	1	1	1	1	1	1	1	1	0	1	1	0	1	0	1	0	0	0	1	0	0	1	1	1
S146	1	1	0	0	1	0	0	0	1	1	1	1	0	0	0	1	0	0	0	1	1	0	1	0	1	1	1	1	1	1	1	1	1	0	1	1	0	1	0	1	0	0	0	1	0	0	1	1	1
S146	1	1	0	0	1	0	0	0	1	1	1	1	0	0	0	1	0	0	0	1	1	0	0	0	1	1	1	1	0	1	0	1	1	0	1	1	0	1	0	-	0	0	0	1	0	0	0	1	1
S146	1	1	0	0	1	0	0	0	1	1	1	1	0	0	0	1	0	0	0	1	1	0	0	0	1	1	1	1	0	1	0	1	1	0	1	1	0	1	0	-	0	0	0	1	0	0	0	1	1
S146	1	1	0	0	1	0	0	0	1	1	1	0	0	0	-	1	0	0	0	1	1	0	1	0	0	0	1	1	1	1	1	0	1	0	1	0	0	1	0	1	-	0	0	1	0	0	-	1	0
S146	1	1	0	0	1	0	0	0	1	1	1	0	0	0	-	1	0	0	0	1	1	0	1	0	0	0	1	1	1	1	1	0	1	0	1	0	0	1	0	1	-	0	0	1	0	0	-	1	0
S146	1	1	0	0	1	0	0	0	1	1	1	0	0	0	-	1	0	0	0	1	1	0	1	0	0	0	1	1	1	1	1	0	1	0	1	0	0	1	0	1	-	0	0	1	0	0	-	1	0
S146	1	1	0	0	1	0	0	0	1	1	1	0	0	0	0	1	0	0	0	1	1	0	1	0	1	1	1	1	1	0	1	1	1	0	1	1	0	0	0	0	0	0	0	1	0	0	0	1	1
S146	1	1	0	0	1	0	0	0	1	1	1	0	0	0	0	1	0	0	0	1	1	0	1	0	1	1	1	1	1	0	1	1	1	0	1	1	0	0	0	0	0	0	0	1	0	0	0	1	1
S146	1	1	0	0	1	0	0	0	1	1	1	1	0	0	0	1	0	0	0	1	1	0	1	0	1	1	1	1	1	1	1	1	1	0	1	1	0	1	0	1	0	0	0	1	0	0	1	1	1
S146 Average	0.578947	0.947368	0.421053	0.421053	0.789474	0	0.421053	0	0.578947	0.578947	1	0.684211	0.421053	0	0	0.578947	0	0	0	0.578947	0.578947	0	0.894737	0	0.789474	0.842105	0.578947	0.578947	0.894737	0.421053	0.894737	0.777778	1	0	1	0.421053	0	0.473684	0	0.466667	0.4375	0	0.263158	0.578947	0	0	0.214286	0.894737	0.421053
S147	1	1	1	1	0	0	1	0	0	1	1	1	1	1	1	1	1	0	0	1	0	1	0	0	1	1	0	1	1	1	1	1	0	0	0	0	0	1	0	1	1	0	0	0	0	0	0	1	1
S147	1	1	1	1	0	0	0	0	0	1	1	0	1	1	1	1	0	0	0	1	0	1	0	0	1	1	0	1	0	0	1	0	0	0	0	0	0	1	0	-	-	0	0	0	0	0	-	0	1
S147	1	0	1	1	0	0	1	0	0	1	1	-	1	0	0	1	0	0	0	1	0	1	0	0	0	1	0	1	1	1	1	0	0	0	0	0	0	0	0	0	0	0	0	0	0	0	0	1	1
S147	1	0	1	1	0	0	1	0	0	1	1	-	1	0	0	1	0	0	0	1	0	1	0	0	0	1	0	1	1	1	1	0	0	0	0	0	0	0	0	0	0	0	0	0	0	0	0	1	1
S147	1	1	1	1	0	0	1	0	0	1	1	1	1	0	1	0	0	-	0	1	0	1	0	0	0	1	0	1	0	1	0	-	0	0	0	0	0	1	0	-	-	0	0	0	0	0	0	1	1
S147	1	1	1	1	0	0	1	0	0	1	1	1	1	1	1	1	1	0	0	1	0	1	0	0	1	1	0	1	1	1	1	0	0	0	0	0	0	1	0	0	1	0	0	0	0	0	0	1	1
S147	1	1	1	1	0	0	1	0	0	1	1	1	1	1	1	1	1	0	0	1	0	1	0	0	1	1	0	1	1	1	1	0	0	0	0	0	0	1	0	0	1	0	0	0	0	0	0	1	1
S147	1	1	1	1	0	0	1	0	0	1	1	0	1	1	1	1	1	0	0	1	0	1	0	0	0	1	0	1	0	1	1	1	0	0	0	0	0	1	0	1	-	0	0	0	0	0	0	0	1
S147	1	1	1	1	0	0	1	0	0	1	1	1	1	1	1	1	0	0	0	1	0	1	0	0	1	1	0	1	1	1	1	1	0	0	0	0	0	1	0	0	1	0	0	0	0	0	0	1	1
S147	1	1	1	1	0	0	1	0	0	1	1	1	1	1	1	1	1	0	0	1	0	1	0	0	1	1	0	1	1	1	1	1	0	0	0	0	0	1	0	0	1	0	0	0	0	0	0	1	1
S147	1	1	1	1	0	0	1	0	0	1	1	1	1	1	1	1	1	0	0	0	0	0	0	0	1	1	0	1	0	1	1	0	0	0	0	0	0	0	0	-	1	0	0	0	0	0	0	1	0
S147	1	1	1	1	0	0	0	0	0	0	1	1	1	1	1	1	1	0	0	1	0	1	0	0	0	1	0	1	1	0	1	-	0	-	0	0	0	1	0	0	0	-	0	0	0	0	0	1	1
S147	1	1	1	1	0	0	1	-	0	1	1	0	1	1	0	1	-	-	0	1	0	0	0	0	0	0	0	1	1	1	1	1	0	0	0	0	0	1	0	1	0	0	0	0	0	0	-	1	1
S147	1	1	1	1	0	0	1	-	0	1	1	0	1	1	0	1	-	-	0	1	0	0	0	0	0	0	0	1	1	1	1	1	0	0	0	0	0	1	0	1	0	0	0	0	0	0	-	1	1
S147	1	1	1	1	0	0	1	-	0	1	1	0	1	1	0	1	-	-	0	1	0	0	0	0	0	0	0	1	1	1	1	1	0	0	0	0	0	1	0	1	0	0	0	0	0	0	-	1	1
S147	1	1	1	1	0	0	1	0	0	1	1	1	1	1	1	1	1	0	0	1	0	1	0	0	1	1	0	1	1	1	1	1	0	0	0	0	0	1	0	1	1	0	0	0	0	0	0	1	1
S147	1	1	1	1	0	0	1	0	0	1	1	0	1	1	0	1	1	-	0	1	0	1	0	0	1	1	0	1	1	0	0	0	0	0	0	0	0	0	0	-	0	0	0	0	0	0	0	0	1
S147	1	1	1	1	0	0	1	0	0	0	1	1	1	1	0	1	1	0	0	1	0	1	0	0	1	0	0	1	1	1	1	0	0	0	0	0	0	1	0	-	-	0	0	0	0	0	0	0	0
S147	1	1	1	1	0	0	1	0	0	1	1	1	1	1	1	1	1	0	0	1	0	1	0	0	1	1	0	1	1	1	1	1	0	0	0	0	0	1	0	1	1	0	0	0	0	0	0	1	1
S147	1	1	1	1	0	0	1	0	0	1	1	1	1	1	1	1	1	0	0	1	0	1	0	0	1	1	0	1	1	1	1	1	0	0	0	0	0	1	0	1	1	0	0	0	0	0	0	1	1
S147	1	1	1	1	0	-	1	0	0	1	1	0	1	1	0	1	0	0	0	1	0	1	0	0	1	1	0	1	1	0	1	1	0	0	0	0	0	1	0	0	0	0	0	0	0	0	0	1	1
S147	1	1	1	1	0	-	1	0	0	1	1	0	1	1	0	1	0	0	0	1	0	1	0	0	1	1	0	1	1	0	1	1	0	0	0	0	0	1	0	0	0	0	0	0	0	0	0	1	1
S147 Average	1	0.909091	1	1	0	0	0.909091	0	0	0.909091	1	0.6	1	0.863636	0.590909	0.954545	0.631579	0	0	0.954545	0	0.818182	0	0	0.636364	0.818182	0	1	0.818182	0.772727	0.909091	0.6	0	0	0	0	0	0.818182	0	0.470588	0.5	0	0	0	0	0	0	0.818182	0.909091
S148	0	1	0	1	0	1	1	1	0	0	0	0	0	0	1	0	1	0	0	0	0	0	1	0	1	1	0	1	1	0	0	0	0	0	0	1	0	0	1	0	0	0	0	0	0	0	0	0	0
S148	0	1	0	1	0	1	1	1	0	0	0	0	0	0	1	0	1	1	1	1	1	0	1	1	1	1	0	1	1	0	0	0	0	1	0	1	0	0	1	1	0	1	0	0	1	1	1	1	1
S148	0	1	0	1	0	-	1	1	0	0	0	0	0	0	1	0	1	1	1	1	1	1	1	0	1	0	0	1	1	0	0	0	0	0	0	1	0	0	1	-	0	0	0	0	1	1	1	1	1
S148	0	1	0	1	0	1	1	1	0	0	0	0	0	0	1	0	1	0	0	0	0	0	1	0	1	1	0	1	1	0	0	0	0	0	0	1	0	0	1	0	0	0	0	0	0	0	0	0	0
S148	0	1	0	1	0	1	1	1	0	0	0	0	0	0	0	0	1	1	1	1	1	0	1	1	1	1	0	1	1	0	0	0	0	0	0	1	0	0	1	0	0	0	0	0	1	1	1	1	1
S148	0	1	0	1	0	1	1	1	0	0	0	0	0	0	0	0	1	0	1	1	1	0	1	1	1	0	0	1	1	0	0	0	0	1	0	1	0	0	1	-	0	1	0	0	1	1	0	1	1
S148	1	1	1	0	1	-	1	0	1	1	1	1	1	1	1	1	1	1	1	1	1	1	0	0	1	1	1	1	1	1	1	-	1	-	0	1	1	1	1	0	1	0	1	1	1	1	1	1	1
S148 Average	0.142857	1	0.142857	0.857143	0.142857	1	1	0.857143	0.142857	0.142857	0.142857	0.142857	0.142857	0.142857	0.714286	0.142857	1	0.571429	0.714286	0.714286	0.714286	0.285714	0.857143	0.428571	1	0.714286	0.142857	1	1	0.142857	0.142857	0	0.142857	0.333333	0	1	0.142857	0.142857	1	0.2	0.142857	0.285714	0.142857	0.142857	0.714286	0.714286	0.571429	0.714286	0.714286
S149	1	0	1	1	0	1	1	0	0	1	0	1	0	1	1	1	1	0	0	0	0	1	0	0	0	1	0	1	0	1	1	1	1	0	0	0	0	0	0	1	0	0	0	1	1	1	1	0	0
S149 Average	1	0	1	1	0	1	1	0	0	1	0	1	0	1	1	1	1	0	0	0	0	1	0	0	0	1	0	1	0	1	1	1	1	0	0	0	0	0	0	1	0	0	0	1	1	1	1	0	0
S150	0	0	1	0	0	1	0	1	0	0	0	1	1	0	1	0	0	0	0	1	0	0	1	0	0	1	1	0	1	0	1	1	0	0	1	0	0	1	1	0	0	0	0	1	0	1	1	0	0
S150	0	0	1	0	0	1	0	1	0	0	0	1	1	0	1	0	0	0	0	1	0	0	1	0	0	1	1	0	1	0	1	1	0	0	1	0	0	1	1	-	0	0	0	1	0	1	1	0	0
S150	0	0	1	0	0	1	0	1	0	0	0	1	1	0	1	0	0	0	0	1	0	0	1	0	0	1	1	0	1	0	1	1	0	0	1	0	0	1	1	0	0	0	0	1	0	1	1	0	0
S150	0	0	1	0	0	1	0	1	0	0	0	1	1	0	1	0	0	0	0	1	0	0	1	0	0	1	1	0	1	0	1	1	0	0	1	0	0	1	1	0	0	0	0	1	0	1	1	0	0
S150	0	0	1	0	0	1	0	1	0	0	0	1	1	0	1	0	0	0	0	1	0	0	1	0	0	1	1	0	1	0	1	1	0	0	1	0	0	1	1	0	0	0	0	1	0	1	1	0	0
S150	0	0	1	0	0	1	0	1	0	0	0	0	1	0	0	0	0	0	0	1	0	0	1	0	0	1	1	0	1	0	1	1	0	0	1	0	0	1	1	0	0	0	0	1	0	1	0	0	0
S150	0	0	1	0	0	1	0	1	0	0	0	0	1	0	0	0	0	0	0	1	0	0	1	0	0	1	1	0	1	0	1	1	0	0	1	0	0	1	1	0	0	0	0	1	0	1	0	0	0
S150	0	0	1	0	0	0	0	1	0	0	0	1	1	0	-	0	0	0	0	1	0	0	1	0	0	1	1	0	1	0	1	-	0	0	1	1	0	-	1	0	0	-	0	1	0	1	-	-	0
S150	0	0	1	0	0	0	0	1	0	0	0	1	0	0	0	0	0	0	0	1	0	0	1	0	0	1	0	0	1	0	1	1	0	-	1	0	0	1	0	-	-	0	0	1	0	1	1	0	0
S150	0	0	1	0	0	0	0	1	0	0	0	1	0	0	0	0	0	0	0	1	0	0	1	0	0	1	0	0	1	0	1	1	0	-	1	0	0	1	0	-	-	0	0	1	0	1	1	0	0
S150	0	0	1	0	0	0	0	1	0	0	0	1	0	0	0	0	0	0	0	1	0	0	1	0	0	1	0	0	1	0	1	1	0	-	1	0	0	1	0	-	-	0	0	1	0	1	1	0	0
S150	0	0	1	0	0	0	0	1	0	0	0	1	0	0	0	0	0	0	0	1	0	0	1	0	0	1	0	0	1	0	1	1	0	-	1	0	0	1	0	-	-	0	0	1	0	1	1	0	0
S150	0	0	1	0	0	1	0	1	0	0	0	1	1	0	1	0	0	0	0	1	0	0	1	0	0	1	1	0	1	0	1	1	0	0	1	0	0	1	1	0	0	0	0	1	0	1	1	0	0
S150	0	0	1	0	0	1	0	1	0	0	0	1	1	0	1	0	0	0	0	1	0	0	1	0	0	1	1	0	1	0	1	1	0	0	1	0	0	1	1	0	0	0	0	1	0	1	1	0	0
S150	0	0	1	0	0	1	0	1	0	0	0	1	1	0	1	0	0	0	0	1	0	0	1	0	0	1	1	0	1	0	1	1	0	0	1	0	0	1	1	0	0	0	0	1	0	1	1	0	0
S150	0	0	1	0	0	1	0	1	0	0	0	1	1	0	1	0	0	0	0	1	0	0	1	0	0	1	1	0	1	0	1	1	0	0	1	0	0	1	1	0	0	0	0	1	0	1	1	0	0
S150	0	0	1	0	0	1	0	1	0	0	0	1	1	0	1	0	0	0	0	1	0	0	1	0	0	1	1	0	1	0	1	1	0	0	1	0	0	1	1	-	0	0	0	1	0	1	1	0	0
S150	0	0	1	0	0	1	0	1	0	0	0	1	1	0	1	0	0	0	0	1	0	0	1	0	0	1	1	0	1	0	1	1	0	0	1	0	0	1	1	0	0	0	0	1	0	1	1	0	0
[truncated: 18,457 more rows]
[truncated: 44 more columns]
