# Supplementary material for: Ultra-High-Density Genetic Maps of Jatropha curcas × Jatropha integerrima and Anchoring Jatropha curcas Genome Assembly Scaffolds
Source: MDPI journal article supplement (doi:10.3390/f14091907), 2023-09-19
Supplement: s1 [file s1 › Supplementary Table S3_Jat_r4.5 Scaffold Genotype.xlsx]

## Sheet: Jat_r4.5 Scaffolds Genotypes 
Supplementary Table S3: Jat_r4.5 Scaffolds SNP genotypes of the mapping population obtained from TASSEL pipeline
rs#	alleles	chrom	pos	strand	assembly#	BC1_01:C4Y4MACXX:5:250355260	BC1_02:C4Y4MACXX:5:250355261	BC1_03:C4Y4MACXX:5:250355262	BC1_04:C4Y4MACXX:5:250355263	BC1_05:C4Y4MACXX:5:250355264	BC1_06:C4Y4MACXX:5:250355265	BC1_07:C4Y4MACXX:5:250355266	BC1_08:C4Y4MACXX:5:250355267	BC1_09:C4Y4MACXX:5:250355268	BC1_10:C4Y4MACXX:5:250355269	BC1_11:C4Y4MACXX:5:250355270	BC1_12:C4Y4MACXX:5:250355271	BC1_13:C4Y4MACXX:5:250355272	BC1_14:C4Y4MACXX:5:250355273	BC1_15:C4Y4MACXX:5:250355274	BC1_16:C4Y4MACXX:5:250355275	BC1_17:C4Y4MACXX:5:250355276	BC1_18:C4Y4MACXX:5:250355277	BC1_19:C4Y4MACXX:5:250355278	BC1_20:C4Y4MACXX:5:250355279	BC1_21:C4Y4MACXX:5:250355280	BC1_22:C4Y4MACXX:5:250355281	BC1_23:C4Y4MACXX:5:250355282	BC1_24:C4Y4MACXX:5:250355283	BC1_25:C4Y4MACXX:5:250355284	BC1_26:C4Y4MACXX:5:250355285	BC1_27:C4Y4MACXX:5:250355286	BC1_28:C4Y4MACXX:5:250355287	BC1_29:C4Y4MACXX:5:250355288	BC1_30:C4Y4MACXX:5:250355289	BC1_32:C4Y4MACXX:5:250355290	BC1_33:C4Y4MACXX:5:250355291	BC1_34:C4Y4MACXX:5:250355292	BC1_35:C4Y4MACXX:5:250355293	BC1_36:C4Y4MACXX:5:250355294	BC1_37:C4Y4MACXX:5:250355295	BC1_38:C4Y4MACXX:5:250355296	BC1_42:C4Y4MACXX:5:250355297	BC1_43:C4Y4MACXX:5:250355298	BC1_44:C4Y4MACXX:5:250355299	BC1_45:C4Y4MACXX:5:250355300	BC1_46:C4Y4MACXX:5:250355301	BC1_47:C4Y4MACXX:5:250355302	BC1_48:C4Y4MACXX:5:250355303
S1_7323	C/G	1	7323	+	NA	S	C	S	S	S	C	C	C	S	C	C	C	S	S	S	C	C	C	C	C	C	S	S	S	H	C	C	C	C	C	C	N	C	C	S	S	C	S	S	H	C	S	S	C
S1_136141	A/G	1	136141	+	NA	R	A	R	R	R	R	A	A	R	A	A	A	R	R	R	A	A	A	A	A	A	R	R	R	R	A	A	A	R	A	A	R	A	A	R	R	A	R	R	A	A	R	R	A
S2_9828	G/T	2	9828	+	NA	K	G	G	G	K	G	K	G	K	G	G	K	G	G	G	K	G	G	G	G	K	K	G	G	K	K	K	K	K	K	G	K	K	G	G	G	G	K	G	K	G	G	G	K
S2_64792	A/G	2	64792	+	NA	R	A	A	A	R	N	R	A	R	A	A	R	A	A	A	R	A	A	A	A	R	R	A	A	R	R	R	R	R	R	A	R	R	A	A	A	A	R	A	H	N	A	A	R
S2_141926	G/A	2	141926	+	NA	R	G	G	G	R	G	R	G	R	G	G	R	G	G	G	R	G	G	G	G	R	R	G	G	R	R	R	R	R	R	G	R	R	G	G	G	G	R	G	H	N	G	G	R
S2_204370	G/A	2	204370	+	NA	R	G	G	G	R	G	R	G	R	G	G	R	G	G	G	R	G	G	G	G	R	R	G	G	R	G	R	R	R	R	G	R	R	G	G	G	G	R	G	R	G	G	G	R
S2_272641	A/T	2	272641	+	NA	A	W	A	A	A	A	W	A	W	W	A	W	A	W	W	A	W	W	W	A	A	A	A	W	A	W	A	A	A	A	A	A	A	A	A	A	W	W	A	A	A	W	A	A
S3_23383	T/G	3	23383	+	NA	T	T	K	K	K	K	T	T	K	T	T	T	K	K	K	T	T	T	T	T	T	K	K	K	K	T	T	T	K	T	T	K	T	T	K	K	T	K	K	T	T	K	K	T
S3_83877	T/C	3	83877	+	NA	T	T	Y	Y	Y	Y	T	T	Y	T	T	T	Y	Y	Y	T	T	T	T	T	T	Y	Y	Y	Y	T	T	T	Y	T	T	Y	T	T	Y	Y	T	Y	Y	Y	T	T	Y	T
S3_147778	C/T	3	147778	+	NA	C	C	Y	Y	Y	C	C	C	C	C	C	C	Y	Y	Y	C	C	C	C	C	C	C	Y	C	Y	C	C	C	C	C	Y	C	C	C	Y	Y	C	Y	Y	C	C	C	Y	C
S3_200787	G/A	3	200787	+	NA	G	G	R	R	R	R	G	G	R	G	G	G	R	R	R	G	G	G	G	G	G	R	R	R	R	G	G	G	R	G	R	R	G	G	R	R	G	R	R	R	G	R	R	G
S4_19774	C/A	4	19774	+	NA	M	C	C	C	M	C	M	C	M	M	M	M	C	C	C	M	C	N	C	C	M	M	C	C	M	M	M	M	M	H	C	H	M	C	C	C	C	M	C	N	C	C	C	M
S4_73959	A/T	4	73959	+	NA	W	A	W	A	W	W	W	A	W	A	A	A	W	W	A	A	A	A	A	A	W	W	W	W	W	A	A	A	W	A	A	W	A	W	A	A	A	W	W	W	A	W	W	A
S4_127561	T/C	4	127561	+	NA	Y	T	Y	T	Y	Y	Y	T	Y	T	T	T	Y	Y	T	T	T	T	T	T	Y	Y	Y	Y	Y	T	T	T	Y	T	T	Y	T	Y	T	T	T	Y	Y	Y	T	Y	Y	T
S4_183163	A/G	4	183163	+	NA	R	A	R	A	R	R	R	A	R	A	A	A	R	R	A	A	A	A	A	A	R	R	R	R	R	A	A	A	R	A	A	R	A	R	A	A	A	R	R	A	A	A	R	A
S5_27991	T/A	5	27991	+	NA	T	W	T	T	T	T	T	T	T	W	T	W	T	W	W	T	W	W	W	T	W	T	T	T	T	W	T	T	T	T	T	W	W	W	T	T	T	W	T	T	T	T	T	T
S5_117964	T/C	5	117964	+	NA	T	Y	T	T	T	T	T	T	Y	Y	T	Y	T	Y	T	T	Y	N	Y	T	Y	T	T	T	T	Y	T	T	T	T	T	N	Y	Y	T	T	Y	Y	T	T	T	Y	T	T
S5_170217	T/A	5	170217	+	NA	T	W	T	T	T	T	T	T	W	W	T	W	T	W	W	T	W	W	W	T	W	T	T	T	T	W	T	T	T	T	T	W	W	W	T	T	W	W	T	T	T	W	T	T
S6_66908	C/T	6	66908	+	NA	Y	C	C	C	Y	C	Y	C	Y	Y	Y	Y	C	C	C	Y	C	C	C	C	Y	C	C	C	Y	Y	Y	Y	Y	Y	Y	Y	Y	C	C	C	C	Y	C	Y	C	C	C	Y
S6_119350	A/G	6	119350	+	NA	R	A	A	A	R	A	R	A	R	A	R	R	A	A	A	R	A	A	A	A	R	A	A	A	R	R	R	R	R	R	R	R	R	A	A	A	A	R	A	N	N	A	A	R
S7_7124	C/T	7	7124	+	NA	Y	Y	C	Y	C	C	Y	C	Y	C	C	C	C	Y	C	C	Y	C	Y	C	C	Y	C	C	Y	C	Y	Y	Y	C	C	Y	Y	C	C	C	Y	Y	C	H	C	C	C	Y
S7_74283	C/T	7	74283	+	NA	Y	Y	C	Y	C	C	C	C	C	C	C	C	C	Y	C	C	Y	Y	Y	C	C	Y	C	C	Y	C	Y	Y	Y	C	C	C	Y	C	C	C	Y	Y	C	Y	Y	C	C	Y
S7_145511	G/A	7	145511	+	NA	R	R	G	R	G	G	R	G	R	G	G	G	G	R	G	G	R	R	R	G	G	R	G	G	R	G	R	R	R	G	G	R	R	G	G	G	R	R	G	R	R	G	G	G
S8_3685	T/G	8	3685	+	NA	T	K	T	T	T	N	K	K	K	K	K	K	K	T	T	K	K	N	K	T	K	T	T	K	H	T	K	K	K	T	T	N	K	N	T	T	K	T	T	T	T	K	T	K
S8_68337	T/A	8	68337	+	NA	T	W	T	T	W	W	W	W	W	W	W	W	W	T	T	W	H	W	T	T	W	T	T	W	W	T	W	W	W	T	T	T	W	T	T	T	W	T	T	N	T	H	T	H
S8_133047	A/G	8	133047	+	NA	A	R	A	A	R	R	R	H	R	R	R	R	R	A	A	R	R	R	R	A	R	A	A	R	R	A	R	R	R	A	A	R	R	A	A	A	R	A	A	N	A	R	A	R
S8_198325	A/T	8	198325	+	NA	A	W	A	A	W	W	W	A	W	W	W	W	W	A	A	W	W	W	W	A	W	A	A	W	W	A	W	W	W	A	A	H	W	A	A	A	W	A	A	W	A	W	A	W
S9_106071	A/G	9	106071	+	NA	R	A	R	A	R	R	R	A	R	A	A	A	R	R	A	A	A	A	A	A	R	R	R	R	R	A	A	A	H	R	A	H	A	R	A	A	A	R	R	A	A	N	R	A
S10_5054	T/C	10	5054	+	NA	T	Y	Y	Y	Y	T	Y	Y	T	T	Y	T	Y	T	Y	T	T	T	T	Y	Y	Y	Y	T	T	T	T	T	Y	T	Y	H	T	Y	Y	T	T	Y	Y	T	T	T	T	Y
S11_11855	G/A	11	11855	+	NA	G	R	G	G	R	H	R	R	R	H	R	G	R	G	R	R	R	R	R	R	R	G	G	R	R	G	R	R	R	G	G	N	R	H	G	G	R	G	G	G	G	N	R	R
S11_134336	A/G	11	134336	+	NA	A	A	R	R	A	R	A	A	A	A	R	R	A	R	A	R	R	A	A	R	R	R	A	A	A	R	R	R	A	R	R	R	R	A	A	A	A	R	A	R	A	R	A	A
S12_8485	G/C	12	8485	+	NA	G	G	S	S	G	S	H	G	G	S	G	S	G	S	S	S	S	G	G	G	G	S	G	G	G	S	G	S	G	S	S	H	S	G	G	G	G	G	G	G	S	G	G	H
S12_84856	A/G	12	84856	+	NA	A	A	R	R	A	R	R	A	A	R	A	R	A	R	R	R	R	A	A	A	A	R	A	A	A	R	A	R	A	R	R	R	R	A	A	A	A	A	A	R	R	A	A	R
S13_3154	A/G	13	3154	+	NA	A	R	A	R	A	R	R	R	A	A	A	A	A	A	R	R	R	A	A	A	A	A	A	N	R	A	A	R	R	A	A	A	A	A	A	A	A	A	A	A	A	A	A	A
S13_55804	A/C	13	55804	+	NA	A	M	A	M	A	M	M	M	A	A	A	A	A	A	M	M	M	M	M	M	M	A	A	M	M	A	A	M	M	A	A	A	A	M	A	A	A	A	A	M	A	M	M	A
S13_106967	A/G	13	106967	+	NA	A	R	A	H	A	N	R	H	A	A	A	A	A	A	R	R	A	H	R	R	R	A	A	R	R	A	A	R	A	A	A	A	A	R	A	A	A	A	A	R	A	A	R	A
S14_796	A/G	14	796	+	NA	R	R	A	R	A	A	R	A	R	A	A	A	A	R	A	A	R	R	R	A	A	R	A	A	R	A	R	R	R	A	A	R	R	A	A	A	R	R	A	N	R	A	A	A
S14_77938	G/C	14	77938	+	NA	S	S	G	S	G	G	S	G	S	G	G	G	G	S	G	G	S	S	S	G	G	S	G	G	S	G	S	S	S	G	G	H	S	G	G	G	S	S	G	S	H	G	G	G
S14_128398	T/C	14	128398	+	NA	Y	H	T	Y	T	T	Y	T	Y	T	T	T	T	Y	T	T	Y	Y	Y	T	T	Y	T	T	Y	T	Y	Y	Y	T	T	T	Y	T	T	T	Y	Y	T	T	N	T	T	T
S17_853	T/A	17	853	+	NA	T	T	W	W	W	W	T	T	W	T	T	T	W	W	W	T	T	T	T	T	T	W	W	W	W	T	T	T	W	T	W	W	T	T	W	W	T	W	W	W	T	W	W	T
S17_55673	T/C	17	55673	+	NA	T	T	Y	Y	Y	Y	T	T	Y	T	T	T	Y	Y	H	T	T	T	T	T	T	Y	Y	H	Y	T	T	T	Y	T	Y	Y	T	T	H	H	T	Y	H	Y	T	Y	Y	T
S17_117336	A/C	17	117336	+	NA	A	A	H	M	M	M	A	A	M	A	A	N	M	M	N	A	A	A	A	A	A	M	M	M	N	A	A	A	M	A	M	N	A	A	M	M	A	M	M	N	A	M	M	A
S19_42733	C/T	19	42733	+	NA	C	Y	Y	Y	Y	Y	Y	Y	C	C	Y	C	Y	C	Y	C	C	C	C	Y	Y	C	Y	C	C	C	C	C	Y	C	Y	Y	C	Y	Y	C	C	Y	Y	C	C	C	C	Y
S21_47267	A/C	21	47267	+	NA	A	M	A	A	A	A	A	A	A	A	M	M	A	A	M	A	M	M	M	A	M	A	A	A	A	M	A	A	A	A	A	M	M	M	A	A	A	M	A	N	A	M	A	A
S21_160560	G/A	21	160560	+	NA	G	R	G	G	G	G	G	G	G	G	R	R	G	G	R	G	R	R	R	G	R	G	G	G	G	R	G	G	G	G	G	R	R	R	G	G	G	R	G	G	G	R	G	G
S22_10160	C/T	22	10160	+	NA	C	C	Y	Y	C	H	C	C	C	C	Y	Y	C	Y	C	Y	Y	C	C	Y	Y	Y	C	C	C	Y	Y	Y	C	H	Y	H	Y	C	C	C	C	Y	C	N	C	H	C	C
S22_90171	T/G	22	90171	+	NA	T	T	K	K	T	K	T	T	T	T	K	K	T	K	T	K	K	T	T	K	K	K	T	T	T	K	K	K	T	K	K	K	K	T	T	T	T	K	T	K	T	K	T	T
S22_143615	T/G	22	143615	+	NA	T	T	K	K	T	K	T	T	T	T	K	K	T	K	T	K	K	T	T	K	K	K	T	T	T	K	K	K	T	K	K	K	K	T	T	T	T	K	T	H	T	K	T	T
S24_31878	A/G	24	31878	+	NA	R	R	R	R	A	R	R	A	A	R	A	R	A	R	R	R	N	A	A	A	A	R	A	A	A	A	A	R	A	R	R	R	R	A	A	A	A	A	A	N	A	A	A	R
S24_98549	C/A	24	98549	+	NA	C	C	C	M	M	M	M	C	M	C	M	C	C	C	M	M	M	C	C	C	C	C	M	M	C	C	C	M	C	C	C	M	M	C	C	M	M	C	C	C	C	C	M	M
S25_16295	C/A	25	16295	+	NA	M	M	C	M	C	C	M	C	M	C	C	C	C	M	C	C	M	M	M	C	C	M	C	C	M	C	M	M	M	C	C	M	M	C	C	C	M	M	C	M	C	C	C	C
S25_119232	A/C	25	119232	+	NA	M	M	A	M	A	A	M	A	M	A	A	A	A	M	A	A	M	M	M	A	A	M	A	A	M	A	M	M	M	A	A	M	M	A	A	A	M	M	A	M	M	A	A	A
S27_5554	G/A	27	5554	+	NA	G	G	G	R	R	R	G	G	G	R	R	R	G	G	G	R	R	G	G	G	R	G	G	G	R	G	G	R	G	G	R	G	G	G	R	R	G	G	G	G	G	R	G	R
S27_76240	G/T	27	76240	+	NA	G	G	G	K	K	K	G	G	G	K	K	K	G	G	G	K	K	G	G	G	K	G	K	G	K	K	G	K	G	G	K	N	G	N	K	K	G	G	G	N	N	K	G	K
S27_135333	A/G	27	135333	+	NA	A	A	A	R	R	R	A	A	A	R	R	R	A	A	A	R	H	A	A	A	R	A	R	A	H	R	A	R	A	A	R	A	A	A	R	R	A	A	A	H	A	R	A	R
S28_737	G/C	28	737	+	NA	S	G	S	G	S	S	S	G	S	G	G	G	S	S	S	G	G	G	G	G	G	S	S	S	S	G	G	G	S	G	G	S	G	G	G	G	G	S	S	H	G	S	S	G
S28_52886	C/T	28	52886	+	NA	Y	C	Y	C	Y	Y	Y	C	Y	C	C	C	Y	Y	Y	C	C	C	C	C	C	Y	Y	Y	Y	C	C	C	Y	C	C	H	C	C	C	C	C	Y	Y	H	C	Y	Y	C
S29_6375	G/A	29	6375	+	NA	G	G	G	G	R	R	R	G	R	G	G	R	G	R	R	R	R	G	G	R	G	G	R	R	G	G	R	G	G	G	G	G	G	G	R	R	R	R	G	G	G	R	R	G
S30_23452	T/C	30	23452	+	NA	Y	Y	T	T	Y	T	Y	T	Y	Y	Y	Y	T	T	T	Y	T	T	T	Y	Y	T	Y	T	Y	Y	Y	Y	Y	Y	Y	Y	Y	T	Y	Y	T	Y	T	T	N	T	T	Y
S30_99388	T/C	30	99388	+	NA	Y	Y	T	T	Y	T	Y	T	Y	Y	Y	Y	T	T	T	Y	T	T	T	Y	Y	T	Y	T	Y	Y	Y	Y	Y	Y	Y	T	Y	T	Y	Y	T	Y	T	H	T	T	T	Y
S31_3250	A/G	31	3250	+	NA	A	A	A	R	R	R	A	A	A	R	R	N	A	A	N	A	R	A	A	A	R	A	R	R	R	R	A	R	A	A	R	H	R	A	R	R	A	A	A	H	A	A	A	H
S31_59457	T/C	31	59457	+	NA	T	T	T	Y	Y	H	T	T	T	Y	Y	Y	T	T	T	T	Y	T	T	T	Y	Y	Y	T	Y	Y	T	Y	T	T	Y	T	Y	T	Y	Y	T	T	T	T	T	T	T	Y
S32_29552	A/G	32	29552	+	NA	R	R	R	R	A	R	R	A	A	R	A	R	A	R	R	R	A	A	A	A	A	R	A	A	A	R	A	R	A	R	R	R	R	A	A	A	A	A	A	N	N	A	A	R
S33_19882	C/T	33	19882	+	NA	Y	Y	C	Y	C	C	Y	C	Y	C	C	C	C	Y	C	C	Y	Y	Y	C	C	Y	C	C	Y	C	Y	Y	Y	C	C	Y	Y	C	C	C	Y	Y	C	Y	Y	C	C	Y
S33_72313	G/T	33	72313	+	NA	K	K	G	K	G	G	K	G	K	G	G	G	G	K	G	G	K	K	K	G	G	K	G	G	K	G	K	K	K	G	G	K	K	G	G	G	K	K	G	K	K	G	G	K
S34_34015	A/C	34	34015	+	NA	A	M	A	A	A	A	A	A	A	M	M	M	A	A	M	A	M	M	M	A	M	A	A	A	A	M	A	A	A	A	A	M	M	M	A	A	A	M	A	A	A	M	A	A
S35_12008	A/T	35	12008	+	NA	W	A	W	A	W	A	A	W	W	A	A	A	W	W	A	A	A	A	A	A	W	W	W	A	W	A	A	A	W	W	A	W	A	W	A	A	A	W	W	N	W	A	W	A
S35_62179	T/A	35	62179	+	NA	W	T	W	T	W	T	T	W	W	T	T	T	W	W	N	T	T	T	T	T	W	W	W	T	W	T	T	T	W	W	T	W	T	T	T	T	T	W	W	T	W	T	W	T
S36_31392	G/A	36	31392	+	NA	G	G	R	R	G	R	G	G	G	G	R	R	G	R	R	R	R	G	G	G	G	R	G	G	G	R	R	R	G	R	R	R	R	G	G	G	G	G	G	R	G	R	G	G
S36_86655	A/C	36	86655	+	NA	A	A	A	M	A	M	A	A	A	A	M	M	A	M	A	M	M	A	A	A	A	M	A	A	A	M	M	M	A	H	M	M	M	A	A	A	A	A	A	M	A	M	A	A
S37_116240	T/C	37	116240	+	NA	T	Y	T	T	T	T	T	T	T	T	Y	Y	T	T	Y	T	Y	Y	Y	T	Y	T	T	T	T	T	T	T	T	T	T	T	Y	Y	T	T	T	Y	T	T	T	Y	T	T
S38_1226	A/G	38	1226	+	NA	A	A	A	R	A	R	A	A	A	A	R	R	A	A	R	A	A	A	A	A	R	A	R	A	R	R	A	R	A	A	H	R	A	A	R	R	N	A	A	A	A	A	A	R
S38_57867	T/G	38	57867	+	NA	K	K	T	T	T	K	T	T	T	K	T	K	K	T	T	K	T	K	T	T	T	K	T	T	K	T	K	K	K	K	T	T	T	T	T	T	T	K	T	T	T	T	T	T
S39_48021	A/T	39	48021	+	NA	A	A	A	W	W	W	A	A	A	A	A	A	W	W	W	A	A	A	A	A	A	W	W	A	W	A	A	A	W	A	W	W	A	A	W	W	A	W	W	A	A	W	W	A
S40_12471	C/G	40	12471	+	NA	S	S	S	S	C	C	S	C	S	S	S	C	C	S	C	C	C	S	S	C	C	S	C	C	S	C	S	S	C	C	C	H	S	C	C	C	S	S	C	N	C	C	S	S
S40_66570	C/A	40	66570	+	NA	M	M	M	M	C	C	M	C	M	M	M	C	C	M	C	C	C	M	M	C	C	M	C	C	M	C	M	M	C	C	C	H	M	C	C	C	M	M	C	C	M	C	M	M
S42_16564	G/C	42	16564	+	NA	G	S	G	G	G	G	S	S	S	S	G	G	G	S	G	G	G	S	S	G	G	G	S	G	G	G	G	G	S	S	G	G	G	G	S	S	S	G	S	H	G	G	S	G
S42_72829	T/G	42	72829	+	NA	K	K	T	K	T	T	K	N	K	T	K	N	T	K	T	T	T	K	K	T	T	K	T	T	K	T	K	K	K	T	T	H	H	T	T	T	K	K	T	N	H	T	K	K
S42_125490	C/T	42	125490	+	NA	Y	Y	C	Y	C	C	Y	C	Y	Y	Y	C	C	Y	C	C	C	Y	Y	C	C	Y	C	C	Y	C	H	Y	Y	C	C	H	Y	C	C	C	Y	Y	C	C	H	C	Y	Y
S43_1762	G/T	43	1762	+	NA	G	G	G	K	K	K	G	G	G	G	G	G	K	K	K	G	G	G	G	G	G	K	K	K	K	G	G	G	K	G	K	K	G	G	K	K	G	K	K	K	G	K	K	G
S44_4037	A/G	44	4037	+	NA	R	A	R	A	R	N	A	R	R	A	A	A	R	R	A	A	A	A	A	A	R	R	R	A	R	A	A	A	A	R	A	H	A	R	A	A	A	R	N	A	N	A	R	A
S45_13391	A/T	45	13391	+	NA	W	H	W	W	A	H	W	A	W	A	W	A	A	W	A	A	A	H	W	A	A	W	A	A	H	A	W	W	A	A	A	N	W	A	A	A	H	W	A	A	W	A	W	W
S45_67283	C/T	45	67283	+	NA	Y	Y	Y	Y	C	H	Y	C	Y	Y	Y	C	C	Y	C	C	C	Y	Y	C	C	Y	C	C	Y	C	Y	Y	C	C	C	Y	Y	C	C	C	Y	Y	C	C	Y	C	Y	Y
S46_33875	T/G	46	33875	+	NA	K	K	T	K	T	T	K	T	H	K	K	K	T	T	T	T	K	K	K	T	T	K	T	T	K	K	K	K	T	T	K	H	T	T	T	T	K	K	T	K	T	T	K	T
S47_7109	G/A	47	7109	+	NA	G	R	G	G	R	R	R	R	R	R	R	R	R	G	G	R	R	R	R	G	R	G	G	R	R	G	R	R	R	G	G	R	R	G	G	G	R	G	G	R	G	R	R	R
S47_85511	G/A	47	85511	+	NA	G	R	G	G	R	H	H	R	R	R	R	H	H	G	G	R	R	H	R	G	R	G	G	R	H	G	R	R	H	G	G	H	R	G	G	G	H	G	G	N	N	R	R	R
S49_11067	G/A	49	11067	+	NA	G	G	G	R	R	R	G	G	G	G	G	G	R	R	R	G	G	G	G	G	G	R	R	R	R	G	G	G	R	G	R	R	G	N	R	R	G	R	R	N	G	R	R	G
S49_78709	T/A	49	78709	+	NA	T	T	T	W	W	W	T	T	T	T	T	T	W	W	W	T	T	T	T	T	T	W	W	W	W	T	T	T	W	T	W	W	T	T	W	W	T	W	W	W	T	W	W	T
S50_28679	G/A	50	28679	+	NA	G	G	R	R	G	R	R	G	G	R	R	R	R	R	R	R	R	G	G	R	R	R	G	G	G	R	G	G	R	R	G	H	G	R	G	G	N	R	G	N	G	G	G	G
S51_8407	A/G	51	8407	+	NA	A	R	A	A	A	A	A	A	R	R	A	R	A	R	R	A	R	R	R	A	R	A	A	A	A	R	A	A	A	A	A	A	R	R	A	A	R	R	A	A	A	R	A	A
S52_36344	C/G	52	36344	+	NA	C	S	C	C	C	S	C	C	C	C	S	S	C	C	C	C	S	S	S	C	S	C	C	C	C	C	C	C	C	S	C	S	C	S	C	C	C	S	C	C	C	S	C	C
S53_138678	T/C	53	138678	+	NA	Y	Y	T	T	Y	T	Y	T	Y	Y	Y	Y	T	T	T	Y	T	T	T	T	Y	T	T	T	Y	Y	Y	Y	Y	Y	Y	H	Y	T	T	T	T	Y	T	T	N	T	T	Y
S55_21939	C/A	55	21939	+	NA	C	C	M	M	C	M	M	C	C	M	M	M	M	M	H	M	M	C	C	M	M	M	C	C	M	C	C	C	M	M	C	M	C	M	C	C	C	M	C	H	C	C	C	C
S56_11846	G/A	56	11846	+	NA	G	G	R	R	G	R	R	R	G	G	R	G	R	G	R	G	G	G	G	R	R	G	R	G	G	G	G	G	R	G	R	R	G	R	R	G	G	R	R	N	G	G	G	R
S57_9817	T/C	57	9817	+	NA	T	T	Y	Y	T	Y	T	T	T	T	Y	T	T	Y	T	Y	Y	T	T	T	Y	Y	T	T	T	Y	Y	Y	T	Y	Y	T	T	T	T	T	T	Y	T	Y	N	H	T	T
S57_115567	A/C	57	115567	+	NA	A	A	M	M	A	M	A	A	A	A	M	M	A	M	A	M	M	A	A	M	M	M	A	A	A	M	M	M	A	M	M	A	A	A	A	A	A	M	A	M	A	M	A	A
S59_28424	T/C	59	28424	+	NA	T	T	Y	Y	T	Y	T	T	T	T	Y	Y	T	Y	T	Y	Y	T	T	Y	Y	Y	T	T	T	Y	Y	Y	T	Y	Y	T	T	T	T	T	T	Y	T	Y	T	Y	T	T
S59_98285	C/T	59	98285	+	NA	C	C	Y	Y	C	Y	C	C	C	C	Y	Y	C	Y	C	Y	Y	C	C	Y	Y	Y	C	C	C	Y	Y	Y	C	Y	Y	C	C	C	C	C	C	Y	C	Y	C	H	C	C
S60_15320	A/C	60	15320	+	NA	M	M	A	M	A	A	A	A	A	M	M	M	A	A	M	M	M	M	M	A	A	A	A	A	A	A	M	A	A	A	M	M	A	A	M	A	A	A	A	A	N	M	A	M
S60_78562	T/G	60	78562	+	NA	K	T	H	T	K	N	K	K	K	T	T	T	K	K	T	T	T	T	T	T	K	K	K	K	K	T	T	T	K	K	T	H	T	K	T	T	T	K	H	N	T	T	K	T
S61_87	G/T	61	87	+	NA	G	G	K	G	G	K	G	K	G	K	G	K	K	K	K	K	K	G	G	G	K	K	G	G	K	G	G	G	K	K	G	G	G	K	G	G	G	G	G	K	G	G	G	G
S61_58975	T/C	61	58975	+	NA	T	T	Y	T	Y	Y	T	Y	T	Y	T	Y	Y	Y	Y	Y	Y	T	T	T	Y	Y	T	T	Y	T	T	T	Y	Y	T	T	T	Y	T	T	T	Y	T	N	T	T	T	T
S62_17524	A/G	62	17524	+	NA	A	A	R	R	A	R	R	A	A	R	R	R	R	R	R	R	R	A	A	R	R	R	A	A	R	A	A	A	R	R	A	R	A	H	A	A	A	R	A	A	A	A	A	A
S62_107572	A/G	62	107572	+	NA	A	A	A	A	A	A	R	A	A	R	R	A	R	R	R	R	A	A	A	R	R	R	A	A	R	A	A	A	R	R	A	R	A	A	A	A	A	R	A	N	A	A	A	A
S63_9513	G/A	63	9513	+	NA	R	R	G	R	R	H	G	G	R	G	R	G	G	R	G	G	G	R	R	G	G	G	G	G	R	R	R	R	R	G	G	R	R	G	G	G	G	G	G	G	G	R	G	G
S63_72650	C/T	63	72650	+	NA	Y	Y	C	Y	Y	Y	C	C	Y	C	Y	C	C	Y	C	C	C	Y	Y	C	C	C	C	C	Y	Y	Y	Y	Y	C	C	Y	Y	C	C	C	C	C	C	C	Y	Y	C	C
S64_7871	C/T	64	7871	+	NA	Y	Y	C	Y	Y	N	C	C	Y	C	Y	Y	C	Y	C	C	C	Y	Y	C	C	C	Y	C	Y	Y	Y	H	Y	C	Y	Y	Y	C	C	Y	C	C	C	C	Y	C	Y	C
S65_69508	G/C	65	69508	+	NA	G	G	S	S	G	S	G	S	G	G	S	S	S	G	H	G	G	G	G	S	G	G	G	G	G	S	S	G	S	G	S	S	G	G	S	G	G	S	G	G	G	G	G	S
S65_124876	T/C	65	124876	+	NA	T	T	H	Y	T	T	T	Y	T	T	Y	Y	Y	T	T	T	T	T	T	Y	T	T	T	T	T	Y	Y	T	Y	T	Y	H	T	T	Y	T	T	Y	Y	N	T	T	T	H
S66_9722	C/G	66	9722	+	NA	C	S	C	C	S	C	S	H	S	S	S	C	S	C	C	S	H	S	S	C	S	C	C	S	S	C	C	S	S	C	C	H	H	C	C	C	S	C	C	S	C	S	C	S
S66_61228	A/T	66	61228	+	NA	A	W	A	A	W	W	W	W	W	W	W	W	W	A	A	W	W	W	W	A	W	A	A	W	W	A	W	W	W	A	A	W	W	A	A	A	W	A	A	W	A	W	A	W
S66_119666	G/A	66	119666	+	NA	G	R	G	G	R	R	R	R	R	R	R	R	R	G	G	R	R	G	R	G	R	G	G	R	R	G	R	R	R	G	G	R	R	G	G	G	G	G	G	N	G	R	G	R
S67_11996	G/C	67	11996	+	NA	S	S	G	G	S	G	G	G	H	S	S	S	G	G	G	S	G	G	G	S	G	G	S	G	S	S	S	S	S	S	S	G	S	G	S	S	G	S	G	H	S	G	S	S
S67_89482	T/G	67	89482	+	NA	K	K	T	T	K	T	T	T	K	K	K	K	T	T	T	K	T	T	T	K	T	T	K	T	K	K	K	K	K	T	K	K	T	T	K	K	T	T	T	T	K	T	K	K
S70_17534	G/T	70	17534	+	NA	G	K	G	K	K	K	K	K	G	G	K	G	G	G	K	K	K	K	K	K	K	G	G	K	K	G	K	K	K	G	G	K	G	K	G	G	G	G	G	H	G	K	K	K
S71_72752	C/G	71	72752	+	NA	C	C	S	S	C	S	C	S	C	C	H	C	S	C	S	C	C	C	C	S	C	C	S	C	C	S	S	C	S	C	S	N	C	C	S	C	C	S	S	C	C	C	C	S
S72_24791	T/A	72	24791	+	NA	W	T	T	T	W	N	T	W	W	N	T	T	W	W	T	T	N	T	T	T	W	H	H	T	H	T	T	T	W	T	T	W	W	W	T	T	T	W	T	N	H	T	W	W
S73_9321	A/G	73	9321	+	NA	A	A	R	A	R	A	A	R	R	A	A	A	R	R	A	R	A	A	A	R	A	A	R	A	R	R	R	R	R	R	A	A	A	A	A	A	R	A	R	A	R	R	A	A
S73_69513	T/A	73	69513	+	NA	T	T	W	T	W	T	T	W	W	T	T	T	W	W	T	W	T	T	T	W	T	T	W	T	W	W	W	W	W	W	T	T	T	T	T	T	W	T	W	W	W	W	T	T
S74_60491	G/T	74	60491	+	NA	G	G	K	K	G	K	G	G	G	G	G	K	G	K	K	K	K	G	G	G	G	K	G	G	G	K	K	K	G	K	K	K	K	G	G	G	G	G	G	G	G	G	G	G
S75_9191	A/G	75	9191	+	NA	A	A	R	R	A	R	A	A	A	A	H	R	A	R	A	R	H	A	A	R	R	R	A	A	A	R	H	R	A	R	R	R	R	A	A	A	A	R	A	H	A	R	A	A
S75_63137	C/A	75	63137	+	NA	C	C	M	M	C	M	C	C	C	C	M	M	C	M	C	M	M	C	C	M	M	M	C	C	C	M	M	M	C	M	M	M	M	C	C	C	C	M	C	M	C	M	C	C
S77_711	A/G	77	711	+	NA	A	A	R	A	R	R	A	R	A	R	A	A	R	R	R	R	H	A	A	A	R	R	A	A	H	A	A	A	A	R	A	A	A	R	A	A	A	R	A	N	A	A	A	A
S77_69577	C/T	77	69577	+	NA	C	C	H	C	Y	Y	C	Y	C	Y	C	Y	Y	Y	Y	Y	Y	C	C	C	Y	Y	C	C	Y	C	C	C	Y	Y	C	C	C	C	C	C	C	Y	C	N	C	C	C	C
S79_300	A/G	79	300	+	NA	R	R	A	A	R	A	R	A	R	R	R	R	A	A	A	R	A	A	A	R	R	A	R	A	R	R	R	R	R	R	R	R	R	A	R	R	A	R	A	A	A	A	A	R
S79_51798	G/C	79	51798	+	NA	S	S	G	G	H	G	S	G	S	S	S	H	G	G	G	S	G	G	G	S	S	G	S	G	H	S	S	S	S	S	S	S	S	G	S	S	G	S	G	N	G	G	G	S
S80_8604	G/A	80	8604	+	NA	G	R	G	G	R	R	R	R	R	R	R	H	R	G	R	R	G	R	R	G	R	G	G	R	R	G	R	R	R	G	G	R	R	R	G	G	G	G	G	H	G	R	R	R
S80_58627	A/G	80	58627	+	NA	A	R	A	A	A	H	R	R	A	A	R	A	R	A	H	R	H	H	R	A	R	A	A	R	N	A	R	R	A	A	A	A	H	N	A	A	R	A	A	N	N	R	A	R
S81_42964	C/T	81	42964	+	NA	C	C	C	C	Y	C	C	Y	Y	C	C	C	C	Y	C	Y	C	C	C	Y	C	C	Y	C	C	Y	C	C	Y	Y	C	C	C	C	Y	C	C	C	Y	N	N	C	Y	C
S82_21309	C/T	82	21309	+	NA	C	C	C	Y	Y	Y	C	C	C	Y	Y	Y	C	C	Y	C	Y	C	C	C	Y	C	Y	C	Y	Y	C	Y	C	C	H	N	Y	C	Y	Y	C	C	C	N	C	C	C	Y
S83_30966	A/G	83	30966	+	NA	A	A	R	R	A	R	A	R	A	A	R	A	R	A	R	A	A	A	A	R	A	A	R	A	A	R	R	A	R	A	R	R	A	A	R	A	A	R	R	A	A	A	A	R
S84_103528	A/C	84	103528	+	NA	A	A	M	M	A	M	M	A	A	A	A	M	A	M	M	M	M	A	A	A	A	M	A	A	A	M	A	M	A	M	M	M	M	A	A	A	A	A	A	A	A	A	A	A
S86_34179	G/A	86	34179	+	NA	G	G	R	R	G	R	R	G	G	R	R	R	R	R	R	R	R	G	G	R	R	R	G	G	R	R	G	G	R	R	G	R	G	R	G	G	G	R	G	R	G	G	G	G
S87_2331	C/T	87	2331	+	NA	C	Y	C	C	C	C	C	C	Y	Y	C	Y	C	Y	Y	C	Y	Y	Y	C	Y	C	C	Y	C	Y	C	C	C	C	C	C	Y	Y	C	C	Y	Y	C	C	C	Y	C	C
S87_86494	A/T	87	86494	+	NA	A	W	A	A	A	A	A	A	W	W	A	W	A	W	W	A	W	W	W	A	W	A	A	W	A	W	A	A	A	A	A	A	W	W	A	A	W	W	A	A	A	W	A	A
S89_1444	G/T	89	1444	+	NA	K	G	K	G	K	K	K	K	K	G	G	G	K	K	G	G	G	G	G	G	K	K	K	K	K	G	G	G	K	K	G	K	G	K	G	G	G	K	K	K	K	G	K	G
S89_62266	A/T	89	62266	+	NA	W	A	W	A	W	H	W	W	W	A	A	N	W	W	A	A	A	A	A	A	W	W	W	W	H	A	A	A	W	A	A	H	A	W	A	A	A	W	A	H	N	A	W	A
S91_9369	C/G	91	9369	+	NA	C	C	C	S	C	S	C	C	C	C	S	H	C	C	N	S	C	C	C	S	S	S	C	C	C	S	S	S	C	S	S	S	S	C	C	C	N	S	C	N	N	S	C	C
S91_60188	T/C	91	60188	+	NA	T	T	Y	Y	T	Y	T	T	T	T	Y	Y	T	Y	N	Y	Y	N	T	T	Y	Y	T	T	T	Y	Y	Y	T	Y	Y	N	Y	T	T	T	N	Y	T	H	N	Y	T	T
S92_6864	C/A	92	6864	+	NA	M	C	M	M	M	C	C	C	C	M	M	M	M	C	C	M	C	C	C	M	C	M	C	C	M	H	C	M	M	M	C	H	M	C	C	C	C	M	C	H	H	M	C	M
S92_62485	A/T	92	62485	+	NA	W	A	H	W	W	A	A	A	A	W	W	W	W	A	A	W	A	A	A	W	A	W	A	A	W	W	A	W	W	W	A	H	W	A	A	A	A	W	A	N	H	A	A	W
S93_12178	T/C	93	12178	+	NA	T	Y	T	T	T	T	T	T	Y	Y	T	Y	T	Y	Y	T	Y	Y	Y	T	Y	T	T	Y	T	Y	T	T	T	T	T	T	Y	Y	T	T	Y	Y	T	T	T	Y	T	T
S93_68556	G/C	93	68556	+	NA	G	S	G	G	G	G	G	G	S	S	G	S	G	S	H	G	S	S	S	G	S	G	G	S	G	S	G	G	G	G	G	N	S	S	G	G	S	S	G	G	G	N	G	G
S94_17978	T/A	94	17978	+	NA	W	T	T	T	W	T	T	T	W	W	T	N	W	W	T	T	T	T	T	T	W	W	W	T	W	T	T	T	W	W	T	N	N	T	T	T	T	W	H	N	W	T	W	T
S94_76509	A/G	94	76509	+	NA	R	A	R	A	R	A	A	R	R	R	A	A	R	R	A	A	A	A	A	A	R	R	R	A	R	A	A	A	R	R	A	R	A	R	A	A	A	R	R	R	R	A	R	A
S95_11961	C/T	95	11961	+	NA	C	Y	C	Y	Y	C	Y	N	C	N	Y	Y	Y	C	C	C	C	C	C	C	C	C	H	C	Y	Y	C	C	Y	C	Y	H	Y	C	C	C	C	C	C	N	H	C	Y	C
S95_67603	T/C	95	67603	+	NA	H	Y	T	Y	Y	T	T	T	T	T	Y	T	Y	T	T	T	T	T	T	T	T	T	Y	T	Y	Y	T	T	Y	T	N	Y	Y	N	T	T	T	T	T	N	T	T	Y	T
S96_9345	T/C	96	9345	+	NA	T	T	Y	T	T	Y	T	Y	T	T	T	Y	T	T	T	T	T	N	T	Y	T	T	Y	T	T	Y	Y	T	Y	T	Y	Y	Y	T	Y	T	T	Y	T	T	T	T	T	Y
S96_65058	G/T	96	65058	+	NA	G	G	K	G	G	K	G	K	G	G	G	K	K	G	G	G	G	G	G	K	G	G	K	G	G	G	K	G	K	G	K	G	K	G	K	G	G	H	G	G	G	G	G	K
S97_3669	A/G	97	3669	+	NA	A	A	R	A	A	A	A	R	A	A	A	R	R	A	R	A	A	A	A	R	A	A	R	A	A	H	R	A	R	A	R	R	A	A	R	A	A	R	R	A	A	A	A	R
S98_1592	T/C	98	1592	+	NA	T	Y	T	Y	T	Y	Y	Y	T	T	T	T	T	T	T	T	Y	Y	Y	Y	Y	T	Y	Y	N	Y	T	Y	Y	T	T	N	T	Y	H	Y	T	T	Y	T	N	N	T	T
S98_55306	G/A	98	55306	+	NA	G	R	G	R	G	R	R	R	G	G	G	G	G	G	R	G	R	R	R	R	R	G	R	R	R	R	G	R	R	G	G	G	G	R	H	R	G	G	R	G	G	R	G	G
S98_107866	T/G	98	107866	+	NA	T	K	T	K	T	K	K	K	T	T	T	T	T	T	K	T	T	K	K	K	K	T	K	K	K	K	T	K	K	K	T	T	T	K	H	K	T	T	K	K	T	K	T	T
S100_69619	A/G	100	69619	+	NA	R	A	R	A	R	R	R	R	R	A	A	A	R	H	A	A	A	A	A	A	R	H	R	R	R	A	A	A	R	R	A	N	A	R	A	A	A	R	R	A	A	A	R	A
S101_31080	A/G	101	31080	+	NA	A	A	A	R	R	H	R	A	R	R	R	N	A	A	A	A	H	A	A	A	R	A	R	R	H	A	A	R	A	A	R	R	R	A	R	R	A	A	A	N	A	A	A	R
S101_93974	C/T	101	93974	+	NA	C	C	C	Y	Y	Y	Y	C	H	Y	Y	Y	C	C	Y	C	Y	C	C	C	Y	C	Y	Y	H	C	C	Y	C	C	Y	Y	Y	C	Y	Y	C	C	C	Y	N	C	C	Y
S102_4981	G/T	102	4981	+	NA	K	K	K	K	G	N	K	G	K	K	K	G	G	K	G	G	G	N	G	G	G	H	G	G	K	G	K	K	G	G	G	N	K	G	G	G	H	K	G	N	N	G	K	K
S102_73387	C/T	102	73387	+	NA	Y	Y	Y	Y	C	C	Y	C	Y	Y	Y	C	C	Y	C	C	C	Y	Y	C	C	Y	C	C	Y	C	Y	Y	C	C	C	Y	Y	C	C	C	Y	Y	C	Y	C	C	Y	Y
S103_45423	T/A	103	45423	+	NA	W	W	T	T	W	T	T	T	W	W	W	T	T	W	T	W	T	T	T	W	T	T	W	W	W	T	W	W	T	T	W	W	W	T	W	W	T	W	T	T	W	T	W	W
S103_100897	T/A	103	100897	+	NA	W	W	T	T	W	T	T	T	W	W	W	T	T	W	T	W	T	T	T	W	T	T	W	W	W	T	W	W	T	T	W	W	W	T	W	W	T	W	T	T	W	T	W	W
S104_6565	G/A	104	6565	+	NA	R	R	G	G	G	R	R	G	R	R	R	G	G	R	G	R	G	G	G	R	G	G	R	R	R	G	R	G	G	G	R	G	R	G	R	R	G	R	G	G	G	G	R	R
S105_1796	G/C	105	1796	+	NA	S	S	G	S	S	S	G	G	S	G	S	S	G	S	G	G	G	S	S	G	G	G	S	G	S	S	S	S	S	G	G	S	S	G	S	S	G	G	G	G	G	S	G	G
S105_94671	C/A	105	94671	+	NA	M	M	C	M	C	M	C	C	C	C	M	M	C	M	C	C	C	C	C	C	C	C	M	C	M	M	M	M	C	C	C	C	M	C	M	M	C	C	C	C	M	C	C	C
S106_15178	C/A	106	15178	+	NA	M	M	C	M	C	C	M	C	M	C	C	C	C	M	C	C	M	M	M	C	C	M	C	C	M	C	M	M	M	C	C	M	M	C	C	C	M	M	C	M	C	C	C	C
S108_16630	G/C	108	16630	+	NA	G	G	S	G	G	G	G	S	G	S	G	S	S	G	G	G	G	G	G	S	G	G	S	G	G	G	S	G	S	G	S	S	S	G	H	G	G	S	G	G	G	G	G	S
S110_22206	T/C	110	22206	+	NA	T	T	Y	Y	T	Y	Y	T	T	Y	T	Y	T	Y	Y	Y	Y	T	T	T	T	Y	T	T	T	Y	T	Y	T	Y	Y	Y	Y	T	T	T	T	T	T	Y	Y	T	T	T
S111_4533	G/C	111	4533	+	NA	S	G	S	G	S	S	S	S	S	G	G	G	S	S	G	G	G	G	G	G	S	S	S	S	S	G	G	G	S	S	G	G	G	H	G	G	G	S	S	H	N	G	S	G
S111_60876	A/G	111	60876	+	NA	R	A	R	A	R	R	R	R	R	A	A	A	R	R	A	A	A	A	A	A	R	R	R	R	R	A	A	A	R	R	A	A	A	R	A	A	A	R	R	N	H	A	R	A
S112_27229	T/G	112	27229	+	NA	K	K	T	K	T	T	K	T	K	T	T	T	T	K	T	T	K	K	K	T	T	K	T	T	K	T	K	K	K	T	T	K	K	T	T	T	K	K	T	K	K	T	T	T
S112_90243	G/A	112	90243	+	NA	R	R	G	R	G	G	R	G	R	G	G	G	G	R	G	G	R	R	R	G	G	R	G	G	R	G	R	R	R	G	G	R	R	G	G	G	R	R	G	R	R	G	G	G
S113_14588	T/C	113	14588	+	NA	T	Y	T	T	T	T	Y	Y	Y	Y	T	T	T	Y	T	T	T	Y	Y	T	T	T	Y	T	T	T	T	T	Y	T	T	T	T	T	Y	Y	Y	T	Y	Y	T	Y	Y	T
S113_68387	A/G	113	68387	+	NA	A	R	A	A	A	A	R	R	R	R	A	A	A	R	A	A	A	N	R	A	A	A	R	A	A	A	A	A	R	A	A	A	A	A	R	R	R	A	R	A	A	R	R	A
S114_31133	C/G	114	31133	+	NA	S	C	S	C	S	S	S	H	S	C	C	C	S	S	C	C	C	C	C	C	S	S	S	S	S	C	C	C	S	C	C	S	C	S	C	C	C	S	S	S	H	C	S	C
S115_66905	C/T	115	66905	+	NA	Y	Y	C	Y	C	C	Y	C	Y	C	C	C	C	Y	C	C	Y	Y	Y	C	C	Y	C	C	Y	C	Y	Y	Y	C	C	Y	Y	C	C	C	Y	Y	C	H	Y	C	C	C
S117_14551	T/C	117	14551	+	NA	Y	Y	T	T	Y	T	Y	T	Y	Y	Y	Y	T	T	T	Y	T	T	T	T	Y	T	T	T	Y	Y	Y	Y	Y	Y	Y	Y	Y	T	T	T	T	Y	T	Y	T	T	T	Y
S118_11833	A/G	118	11833	+	NA	A	R	A	A	R	A	R	R	R	R	R	R	R	A	A	R	R	R	R	A	R	A	A	R	R	A	H	R	R	A	A	A	R	A	A	A	R	A	A	A	N	R	A	R
S120_25304	G/A	120	25304	+	NA	R	R	G	G	G	G	G	G	R	R	R	G	G	R	G	R	G	G	G	R	G	G	R	R	R	G	R	R	G	G	R	G	R	G	R	R	G	R	G	G	R	G	R	R
S121_40648	T/G	121	40648	+	NA	K	K	T	T	K	T	T	T	K	K	K	T	T	K	T	K	T	T	T	K	T	T	K	K	K	T	K	K	T	T	K	K	K	T	K	K	T	K	T	T	K	T	K	T
S121_92720	A/G	121	92720	+	NA	R	R	A	A	A	A	A	A	R	R	R	A	A	R	A	R	A	A	A	R	A	A	R	R	R	A	R	R	A	A	R	N	R	A	R	R	A	R	A	A	H	A	R	A
S122_12706	T/A	122	12706	+	NA	T	W	T	T	T	T	W	W	W	W	T	T	T	W	T	T	T	W	W	T	T	T	W	T	T	T	T	T	W	T	T	N	T	T	W	W	W	T	W	W	N	T	W	T
S122_68863	C/A	122	68863	+	NA	C	M	C	C	C	C	M	M	M	M	C	C	C	M	C	C	C	M	M	C	C	C	M	C	C	C	C	C	M	M	C	C	C	C	M	M	M	C	M	M	C	C	M	C
S125_10849	G/C	125	10849	+	NA	G	S	G	G	S	G	S	S	S	S	G	G	G	S	G	G	G	G	G	G	G	G	S	G	G	S	G	G	S	S	G	G	G	G	S	S	S	G	S	S	G	G	S	G
S125_77824	A/G	125	77824	+	NA	A	R	A	A	A	A	R	R	R	R	R	A	A	N	A	R	R	A	A	R	A	A	R	R	R	A	R	A	A	A	R	N	A	A	R	R	A	R	A	N	R	R	R	R
S126_10562	G/C	126	10562	+	NA	S	S	G	S	S	S	G	G	S	G	S	S	G	S	G	G	G	S	S	G	G	G	H	G	G	S	S	S	S	G	G	S	S	G	G	S	G	G	G	N	G	G	G	G
S127_4316	T/A	127	4316	+	NA	T	T	T	T	W	T	T	W	W	T	T	T	W	W	T	W	T	T	T	W	T	T	W	T	T	W	W	W	W	W	T	T	T	T	T	T	W	T	W	T	T	T	T	T
S128_3599	G/C	128	3599	+	NA	G	G	S	S	G	H	G	S	G	G	S	G	S	G	S	G	G	G	G	S	S	G	S	G	G	S	S	G	S	G	S	S	G	S	S	S	G	S	S	G	G	G	G	S
S128_67914	T/A	128	67914	+	NA	T	T	W	W	T	H	T	W	T	T	W	T	W	T	W	T	T	T	T	W	W	T	W	T	T	W	W	T	W	T	W	W	T	W	W	T	T	W	W	T	T	T	T	W
S129_8368	A/T	129	8368	+	NA	A	A	A	A	W	A	A	W	H	A	A	A	W	W	A	W	A	A	A	W	A	A	W	A	A	W	W	A	W	A	A	A	A	A	W	A	A	A	W	A	A	A	W	A
S131_10891	A/G	131	10891	+	NA	A	A	R	A	R	R	A	H	A	R	A	A	R	R	R	R	A	A	A	A	R	R	A	A	R	A	A	A	R	R	A	A	A	R	A	A	A	R	A	H	A	A	A	A
S131_86217	C/T	131	86217	+	NA	C	C	Y	C	Y	H	C	Y	C	Y	C	Y	Y	Y	Y	Y	Y	C	C	C	Y	Y	C	C	Y	C	C	C	Y	Y	C	C	C	Y	C	C	C	Y	C	H	C	C	C	C
S132_15061	T/C	132	15061	+	NA	T	Y	T	T	Y	Y	Y	Y	Y	Y	Y	Y	Y	T	T	Y	Y	Y	Y	T	Y	T	T	Y	Y	T	Y	Y	Y	T	T	H	Y	T	T	T	Y	T	T	T	T	Y	T	Y
S132_124764	T/C	132	124764	+	NA	T	Y	T	T	Y	Y	Y	Y	Y	Y	Y	Y	Y	T	T	Y	Y	Y	Y	T	Y	T	T	Y	Y	T	Y	Y	Y	T	T	Y	Y	T	T	T	Y	T	T	T	T	Y	T	Y
S135_716	A/T	135	716	+	NA	A	A	A	W	W	A	A	A	A	W	W	A	A	A	W	A	W	A	A	A	W	A	A	A	W	W	A	W	A	A	W	W	W	A	A	W	A	A	A	H	A	A	A	W
S135_64875	C/T	135	64875	+	NA	C	C	C	Y	Y	Y	C	C	C	Y	Y	Y	C	C	C	Y	Y	C	C	C	Y	C	Y	C	Y	Y	C	Y	C	C	Y	Y	Y	C	Y	Y	C	C	C	C	N	C	C	Y
S136_62244	G/A	136	62244	+	NA	G	R	R	G	G	G	G	G	R	R	G	R	G	R	R	G	R	N	R	G	R	G	G	R	G	R	G	G	G	G	G	G	R	R	G	G	R	R	G	G	G	R	G	G
S137_53561	T/A	137	53561	+	NA	T	T	W	T	W	T	T	W	W	T	T	T	W	W	T	W	T	T	T	W	T	T	W	T	T	W	W	W	W	W	T	T	T	T	T	T	W	T	W	W	T	W	T	T
S138_10136	A/G	138	10136	+	NA	A	A	A	R	A	R	A	A	A	R	R	R	A	A	R	R	R	A	A	A	R	A	R	A	R	R	A	R	A	A	R	R	A	A	R	R	A	A	A	A	N	A	A	R
S138_83202	G/A	138	83202	+	NA	G	G	G	R	R	R	G	G	G	R	R	R	G	G	R	R	R	G	G	G	R	G	R	G	R	R	G	R	G	G	R	G	R	G	R	R	G	G	G	G	G	G	G	R
S139_4776	G/T	139	4776	+	NA	G	G	G	K	K	G	K	G	K	K	K	K	G	G	K	G	K	G	G	G	K	G	K	K	K	G	G	K	G	G	K	K	K	G	K	K	G	G	G	G	G	G	G	K
S139_61031	A/G	139	61031	+	NA	A	A	A	R	R	R	R	A	R	R	R	R	A	A	R	A	R	A	A	A	R	A	A	R	R	A	A	R	A	A	R	A	R	A	R	R	A	A	A	A	A	A	A	R
S141_61895	T/C	141	61895	+	NA	T	T	Y	Y	T	Y	T	T	T	T	Y	T	T	Y	Y	Y	Y	T	T	T	T	Y	T	T	T	Y	Y	Y	T	Y	Y	T	T	T	T	T	T	Y	T	Y	N	H	T	T
S147_31395	G/A	147	31395	+	NA	R	R	R	R	G	G	R	G	G	R	R	R	R	R	R	R	R	G	G	R	G	R	G	G	R	R	G	R	R	R	R	R	G	G	G	G	G	R	G	R	R	G	G	G
S149_7208	G/C	149	7208	+	NA	S	G	S	S	G	S	S	G	G	S	G	S	G	S	S	S	S	G	G	G	G	S	G	G	G	S	G	S	G	S	S	S	S	G	G	G	G	G	G	S	H	G	G	S
S150_15806	G/A	150	15806	+	NA	G	G	R	G	G	R	G	R	G	G	G	R	R	G	R	G	G	G	G	R	G	G	R	G	G	R	R	G	R	G	R	R	G	G	R	G	G	R	R	G	G	G	G	R
S150_74154	T/G	150	74154	+	NA	T	T	K	T	T	K	T	K	T	T	T	K	K	T	K	T	T	T	T	K	T	T	K	T	T	K	K	T	K	T	K	K	T	T	K	T	T	K	K	T	T	T	T	K
S151_38862	G/A	151	38862	+	NA	G	G	R	G	G	R	G	R	G	R	G	G	R	G	G	G	G	G	G	R	G	G	R	G	G	G	R	G	R	G	R	R	R	G	H	G	G	R	G	G	G	G	G	R
S152_11279	C/T	152	11279	+	NA	C	C	C	Y	Y	Y	Y	C	C	Y	Y	C	C	C	Y	C	Y	C	C	C	Y	C	Y	Y	Y	C	C	Y	C	C	Y	N	Y	C	C	Y	C	C	C	Y	N	C	C	Y
S154_8015	G/A	154	8015	+	NA	G	G	G	R	R	R	G	G	G	R	R	R	G	G	R	R	R	G	G	G	R	G	G	G	R	R	G	R	G	G	R	R	R	G	R	R	G	G	G	G	G	G	G	R
S154_61633	T/C	154	61633	+	NA	T	T	T	Y	Y	Y	T	T	T	Y	Y	Y	T	T	Y	Y	Y	T	T	T	Y	T	Y	T	Y	Y	T	Y	T	T	Y	Y	Y	T	Y	Y	T	T	T	N	T	T	T	Y
S155_4468	T/A	155	4468	+	NA	T	T	W	W	T	W	T	T	T	T	W	W	T	W	N	W	W	T	T	W	W	W	T	T	T	W	W	W	T	W	W	H	W	T	T	T	T	W	T	H	T	W	T	T
S156_18762	A/G	156	18762	+	NA	A	R	A	A	A	R	R	A	R	A	A	R	A	R	A	R	R	A	A	A	A	A	R	R	A	A	R	A	A	A	A	A	A	A	R	R	A	R	A	A	A	R	R	A
S158_47407	C/T	158	47407	+	NA	C	C	C	C	Y	Y	C	Y	C	Y	C	H	Y	Y	Y	Y	C	C	C	C	Y	Y	C	C	Y	C	C	C	Y	Y	C	C	C	H	C	C	C	Y	C	Y	C	C	C	C
S158_109754	G/A	158	109754	+	NA	G	G	R	G	R	R	G	R	G	R	G	R	R	R	R	R	R	G	G	G	R	R	G	G	R	G	G	G	R	R	G	G	G	R	G	G	G	R	G	R	G	G	G	G
S159_8605	A/G	159	8605	+	NA	A	A	R	R	A	R	R	R	A	A	R	A	R	A	R	A	A	A	A	R	R	A	R	A	A	A	A	A	R	A	R	R	A	R	R	A	A	R	R	N	A	A	A	R
S161_6157	T/C	161	6157	+	NA	Y	T	Y	T	Y	N	T	Y	Y	T	T	T	Y	Y	T	T	T	T	T	T	Y	Y	T	T	Y	T	T	T	Y	Y	T	H	T	T	T	T	T	Y	Y	N	N	N	Y	T
S161_69836	G/T	161	69836	+	NA	G	G	K	K	G	K	K	G	G	K	G	K	G	K	K	K	K	G	G	G	G	K	G	G	G	K	G	K	G	K	K	K	K	G	G	G	G	G	G	K	K	G	G	K
S162_22021	G/C	162	22021	+	NA	G	S	S	S	S	G	S	G	G	G	S	H	S	G	G	G	G	G	G	G	G	G	S	G	S	S	G	G	S	G	S	H	S	G	S	G	G	G	G	G	H	G	S	G
S164_52987	G/A	164	52987	+	NA	R	R	R	R	G	G	R	G	G	R	R	N	R	R	R	R	R	G	G	G	G	R	G	G	R	H	G	R	R	H	R	R	G	G	G	G	G	R	G	N	N	G	G	R
S166_11802	G/A	166	11802	+	NA	R	R	R	G	G	R	R	G	G	R	G	R	G	R	R	R	R	G	G	G	G	R	G	G	G	G	G	R	G	R	R	R	R	G	G	G	G	G	G	R	R	G	G	R
S167_10081	A/T	167	10081	+	NA	A	A	W	A	W	W	A	W	A	W	A	W	W	A	W	W	W	A	A	A	W	W	A	A	W	A	A	A	W	W	A	A	A	A	A	A	A	W	A	W	A	A	A	A
S167_77268	G/A	167	77268	+	NA	G	G	R	G	R	R	G	R	G	R	G	R	R	R	R	R	R	G	G	G	R	R	G	G	R	G	G	G	R	R	G	G	G	R	G	G	G	R	G	R	G	G	G	G
S168_8622	G/A	168	8622	+	NA	G	G	G	R	R	G	G	G	G	R	R	R	G	G	G	G	R	G	G	G	R	G	R	G	R	R	G	R	G	G	R	N	G	G	R	R	G	G	G	H	G	N	G	R
S169_65099	T/C	169	65099	+	NA	T	Y	T	Y	Y	Y	Y	Y	T	T	Y	T	T	T	Y	Y	Y	Y	Y	Y	Y	T	T	Y	Y	T	Y	Y	Y	T	T	Y	T	Y	T	T	T	T	T	Y	T	Y	Y	Y
S170_13212	G/A	170	13212	+	NA	G	G	R	R	G	H	G	R	G	G	R	R	R	G	R	G	G	G	G	R	G	G	R	G	G	R	R	G	R	G	R	G	G	G	R	R	G	R	H	G	G	G	G	R
S170_77149	C/G	170	77149	+	NA	C	C	C	C	C	N	H	C	S	S	C	H	S	S	S	C	S	S	S	C	C	C	C	S	C	S	C	C	C	C	C	N	C	C	C	C	S	S	C	C	C	S	C	C
S171_3230	T/C	171	3230	+	NA	Y	T	Y	T	Y	Y	Y	T	Y	T	T	T	Y	Y	T	T	T	T	T	T	Y	Y	Y	Y	Y	T	T	T	Y	T	T	Y	T	Y	T	T	T	Y	Y	Y	T	Y	Y	T
S171_57387	C/G	171	57387	+	NA	S	C	S	C	S	S	S	C	S	C	C	C	S	S	C	C	C	C	C	C	C	S	S	S	H	C	C	C	S	C	C	C	C	N	C	C	N	S	S	N	C	H	S	C
S172_69420	G/A	172	69420	+	NA	R	R	G	R	G	G	R	G	R	G	G	G	G	R	G	G	R	R	R	G	G	R	G	G	R	G	R	R	R	G	G	R	R	G	G	G	R	R	G	R	R	G	G	G
S174_69411	T/C	174	69411	+	NA	T	Y	T	Y	Y	T	Y	T	Y	Y	Y	T	T	T	T	Y	Y	T	T	T	T	T	Y	Y	T	T	T	Y	T	T	T	Y	T	T	T	T	Y	T	T	T	T	T	Y	Y
S175_54731	C/T	175	54731	+	NA	C	Y	Y	Y	Y	C	Y	C	C	C	Y	Y	Y	C	C	C	C	C	C	C	C	C	Y	C	Y	Y	C	C	Y	C	Y	Y	Y	C	C	C	C	C	C	C	Y	C	Y	C
S177_17367	T/C	177	17367	+	NA	T	Y	T	T	T	T	T	T	T	T	Y	Y	T	T	Y	T	Y	Y	Y	T	Y	T	T	T	T	T	T	T	T	T	T	Y	Y	Y	T	T	T	Y	T	T	T	Y	T	T
S177_78129	T/C	177	78129	+	NA	T	Y	T	T	T	T	T	T	T	T	Y	Y	T	T	H	T	Y	Y	Y	T	Y	T	T	T	T	T	T	T	T	T	T	Y	Y	Y	T	T	T	Y	T	T	T	Y	T	T
S179_26693	C/T	179	26693	+	NA	C	Y	C	C	Y	H	Y	Y	Y	Y	Y	C	Y	C	H	Y	H	Y	Y	Y	Y	C	C	Y	Y	C	Y	Y	Y	C	C	Y	Y	Y	C	C	Y	C	C	N	N	Y	Y	Y
S182_21665	A/G	182	21665	+	NA	H	R	A	A	R	A	R	A	R	R	R	R	A	A	A	R	A	A	A	R	R	A	A	A	R	R	R	R	R	H	R	R	R	A	A	A	A	R	A	H	A	A	A	R
S184_15783	T/A	184	15783	+	NA	T	T	W	W	T	W	T	T	T	T	W	W	T	W	T	W	W	T	T	W	W	W	T	T	T	W	W	W	T	W	W	W	W	T	T	T	T	W	T	W	T	W	T	T
S184_67445	G/C	184	67445	+	NA	G	G	S	S	G	S	G	G	G	G	S	H	G	S	G	S	G	G	G	S	S	S	G	G	G	S	S	S	G	S	S	H	S	G	G	G	G	S	G	G	G	S	G	G
S185_12727	G/A	185	12727	+	NA	G	G	G	G	G	G	R	R	G	R	G	G	G	R	G	G	G	G	G	G	G	G	R	G	G	R	G	G	G	G	G	G	G	G	R	R	G	G	R	R	G	G	G	G
S187_5188	A/G	187	5188	+	NA	R	A	R	A	R	A	A	R	R	R	A	R	R	R	A	A	A	A	A	A	R	R	R	A	R	A	A	A	R	N	A	R	A	R	A	A	A	R	R	H	N	A	R	A
S188_4263	T/C	188	4263	+	NA	T	T	Y	Y	T	Y	Y	T	T	Y	T	Y	T	Y	Y	Y	Y	T	T	T	T	T	T	T	T	Y	T	Y	T	Y	Y	T	Y	T	T	T	T	T	T	Y	Y	T	T	T
S190_34925	G/A	190	34925	+	NA	R	G	R	G	R	G	R	H	R	G	G	G	R	R	G	G	G	G	G	G	R	R	R	R	G	G	G	G	R	R	G	R	G	G	G	G	G	R	R	H	N	G	R	G
S191_3365	G/A	191	3365	+	NA	G	R	G	G	G	G	G	G	R	R	G	R	G	R	R	G	R	R	R	G	R	G	G	R	G	R	G	G	G	G	G	G	R	R	G	G	R	R	G	G	G	R	G	G
S191_60707	T/C	191	60707	+	NA	Y	H	T	Y	T	T	Y	T	T	T	Y	Y	Y	Y	H	H	Y	T	T	Y	Y	Y	T	T	H	T	T	T	Y	Y	T	T	T	Y	T	T	T	Y	T	H	T	T	T	T
S192_33233	G/A	192	33233	+	NA	G	G	G	R	R	G	G	G	G	G	R	R	G	G	G	R	R	G	G	G	R	G	R	G	R	R	G	R	G	G	R	N	G	G	R	R	G	G	G	N	G	R	G	R
S193_5121	T/C	193	5121	+	NA	T	T	Y	Y	Y	Y	T	T	Y	T	T	T	Y	Y	Y	T	T	T	T	T	T	Y	Y	Y	Y	T	T	T	Y	T	T	Y	T	T	Y	Y	T	Y	Y	Y	T	Y	Y	T
S194_2546	A/G	194	2546	+	NA	A	R	R	R	R	A	R	R	A	A	R	R	R	A	R	A	A	A	A	A	R	R	R	A	R	A	A	R	R	A	R	R	A	R	R	A	A	R	R	A	A	A	A	A
S197_71080	G/A	197	71080	+	NA	R	G	G	R	R	G	G	G	R	G	R	R	G	R	G	G	N	R	R	G	G	G	G	G	R	R	R	R	R	G	R	G	R	G	G	R	G	G	G	G	R	G	R	G
S198_19250	C/T	198	19250	+	NA	C	Y	C	Y	C	C	Y	C	C	C	Y	Y	Y	C	C	C	C	C	C	C	C	C	Y	C	Y	Y	C	C	C	C	Y	C	Y	C	C	C	C	C	C	C	Y	C	C	C
S199_41904	A/G	199	41904	+	NA	A	A	R	A	R	R	A	R	A	R	R	R	R	R	R	R	R	A	A	A	R	R	A	A	R	A	A	A	R	R	A	A	A	R	A	A	A	R	A	R	N	A	A	A
S200_15888	T/A	200	15888	+	NA	T	T	W	W	T	W	T	T	T	T	W	W	T	W	W	W	W	T	T	T	T	W	T	T	T	W	W	W	T	W	W	W	W	T	T	T	T	T	T	T	T	W	T	T
S200_69622	G/A	200	69622	+	NA	G	G	R	R	G	R	G	G	G	G	R	R	G	R	R	R	R	G	G	G	G	R	G	G	G	R	R	R	G	R	R	R	R	G	G	G	G	G	G	N	G	R	G	G
S201_11599	G/A	201	11599	+	NA	R	R	H	R	G	H	R	G	H	R	R	H	G	G	G	G	H	R	R	G	G	H	G	G	R	H	H	R	G	N	G	R	G	G	G	G	R	R	G	N	N	G	R	R
S202_10126	C/T	202	10126	+	NA	C	C	Y	Y	C	Y	C	C	C	C	Y	Y	C	C	Y	Y	Y	C	C	C	C	Y	C	C	C	Y	Y	Y	C	Y	Y	Y	Y	C	C	C	C	Y	C	C	C	Y	C	C
S205_25319	T/G	205	25319	+	NA	T	K	K	K	K	T	K	T	T	T	K	K	K	T	T	T	T	T	T	T	T	T	K	T	K	K	T	T	K	T	K	H	K	T	T	T	T	T	T	T	H	T	K	T
S205_76479	A/T	205	76479	+	NA	A	W	H	W	W	A	W	A	A	A	W	H	W	A	A	A	A	A	A	A	A	A	W	A	A	W	A	A	W	A	W	W	W	A	A	A	A	A	A	N	A	A	W	A
S206_11011	A/G	206	11011	+	NA	A	A	R	R	R	A	R	R	A	A	R	A	R	A	R	A	A	A	A	A	R	R	R	A	R	A	A	R	R	A	R	R	A	R	R	A	A	R	R	A	A	A	R	A
S207_27252	A/T	207	27252	+	NA	W	A	W	A	W	A	A	W	W	W	A	W	W	W	A	A	W	A	A	A	W	W	W	A	W	A	A	A	W	W	A	W	W	W	A	A	A	W	A	W	W	A	W	W
S208_54383	A/G	208	54383	+	NA	A	R	A	A	A	R	A	A	A	A	R	R	A	A	A	A	A	R	R	A	R	A	A	A	A	A	A	A	A	A	A	R	R	R	A	A	A	R	A	N	A	R	A	A
S208_106550	T/A	208	106550	+	NA	T	W	T	T	T	W	T	T	T	T	W	T	T	T	T	T	W	W	W	T	W	T	T	T	T	T	T	T	T	W	T	W	W	W	T	T	T	W	T	T	T	W	T	T
S209_68033	C/A	209	68033	+	NA	C	M	C	C	M	M	M	M	M	M	M	M	M	C	C	M	H	H	M	C	M	C	C	M	M	C	M	M	M	C	C	C	M	M	C	C	M	C	C	H	C	H	M	M
S210_26735	A/T	210	26735	+	NA	W	A	W	W	W	A	W	A	A	W	W	W	W	A	A	W	A	A	A	W	A	W	A	A	W	W	A	W	W	W	A	W	W	A	A	A	A	W	A	H	W	W	A	W
S211_11133	G/A	211	11133	+	NA	G	R	R	R	R	G	R	R	G	G	R	G	R	G	R	G	G	N	G	R	R	R	R	G	G	G	G	G	R	G	R	H	G	R	R	G	G	R	R	G	G	G	G	R
S213_31357	C/T	213	31357	+	NA	C	C	Y	C	Y	N	C	Y	Y	C	C	C	Y	Y	C	C	C	C	C	C	Y	Y	Y	Y	C	C	C	C	Y	Y	C	N	C	C	C	C	C	Y	Y	N	N	C	Y	C
S215_2646	G/A	215	2646	+	NA	G	R	G	G	G	N	R	R	R	R	G	G	G	R	G	G	G	R	R	G	G	G	R	G	G	G	G	G	R	G	G	G	G	G	H	R	R	G	R	N	G	R	R	G
S215_72258	G/A	215	72258	+	NA	G	R	G	G	G	G	R	R	R	R	G	G	G	R	G	G	G	R	R	G	G	G	R	G	G	G	G	G	R	G	G	G	G	G	H	R	R	G	R	R	G	R	R	G
S216_17567	T/C	216	17567	+	NA	Y	Y	T	Y	Y	T	T	T	Y	T	Y	Y	Y	T	T	T	T	T	T	T	T	T	Y	T	Y	Y	T	T	Y	T	Y	Y	Y	T	T	T	T	T	T	T	Y	T	Y	T
S216_72805	T/C	216	72805	+	NA	Y	Y	T	Y	Y	T	T	T	Y	T	Y	Y	Y	T	T	T	T	T	T	T	T	T	Y	T	Y	Y	T	T	Y	T	Y	Y	Y	T	T	T	T	T	T	T	T	T	Y	T
S217_17999	G/A	217	17999	+	NA	G	R	G	G	R	R	R	R	R	R	R	G	R	G	R	R	R	R	R	G	R	G	G	R	R	G	R	R	R	G	G	R	R	R	G	G	R	G	G	R	G	R	R	R
S217_70606	C/T	217	70606	+	NA	C	Y	C	C	Y	Y	Y	Y	Y	Y	Y	C	Y	C	Y	Y	Y	Y	Y	C	Y	C	C	Y	Y	C	Y	Y	Y	C	C	Y	Y	Y	C	C	Y	C	C	H	C	Y	Y	Y
S218_22422	G/A	218	22422	+	NA	R	G	R	G	R	G	G	G	R	R	G	G	R	R	G	G	G	G	G	G	R	R	R	G	R	G	G	G	R	R	G	G	G	R	G	G	G	R	R	G	R	N	R	G
S219_13756	C/G	219	13756	+	NA	C	S	C	C	S	S	S	S	S	S	S	S	S	C	C	S	S	S	S	C	S	C	C	S	S	C	S	S	S	C	C	S	S	C	C	C	S	C	C	S	C	H	C	S
S220_11980	T/A	220	11980	+	NA	W	H	W	W	T	T	W	T	T	W	W	W	W	T	T	W	W	T	T	W	T	W	T	T	W	W	T	T	W	T	W	T	T	T	T	T	T	W	T	H	T	T	T	T
S223_17495	G/T	223	17495	+	NA	K	K	G	G	K	G	G	G	K	H	K	G	G	K	G	K	N	N	G	K	G	G	K	G	K	G	K	K	K	G	K	K	G	G	K	K	G	K	G	G	N	G	K	K
S223_73978	G/A	223	73978	+	NA	R	R	G	G	R	G	G	G	R	R	R	G	G	R	G	R	G	G	G	R	G	G	R	G	R	G	R	R	R	G	R	R	R	G	R	R	G	R	G	G	G	G	R	R
S224_15049	C/T	224	15049	+	NA	C	Y	Y	Y	C	C	Y	C	C	Y	Y	Y	Y	Y	N	H	C	C	C	Y	C	Y	C	C	Y	Y	C	H	C	C	Y	C	C	C	C	N	C	C	C	C	H	C	C	C
S225_64921	G/C	225	64921	+	NA	S	S	G	S	S	G	G	G	S	G	S	H	G	S	G	G	G	S	S	G	G	G	H	G	S	S	H	S	S	G	S	S	S	G	G	S	G	G	G	G	N	N	S	G
S226_1399	A/T	226	1399	+	NA	W	W	A	W	A	A	W	A	W	A	A	A	A	W	A	A	W	W	W	A	A	W	A	A	W	A	W	W	W	A	A	W	W	A	A	A	W	W	A	W	W	A	A	W
S226_70983	G/C	226	70983	+	NA	S	S	G	S	G	G	S	G	S	G	G	G	G	S	G	G	S	S	S	G	G	S	G	G	S	G	S	S	S	G	G	S	S	G	G	G	S	S	G	G	S	G	G	S
S227_13132	C/A	227	13132	+	NA	C	M	C	C	M	M	M	M	M	M	M	C	M	C	M	M	M	M	M	C	M	C	C	M	M	C	M	M	M	C	C	M	M	M	C	C	M	C	C	M	C	M	M	M
S227_76499	T/A	227	76499	+	NA	T	W	T	T	W	T	W	W	W	W	W	T	W	T	W	W	W	W	W	T	W	T	T	W	W	T	W	W	W	T	T	W	W	W	T	T	W	T	T	W	T	W	W	W
S228_4856	A/T	228	4856	+	NA	A	A	A	W	W	W	W	A	W	W	W	A	A	A	W	W	W	A	A	A	A	A	W	W	A	A	A	W	A	A	A	A	W	A	A	W	A	A	A	A	N	A	W	W
S228_59817	T/C	228	59817	+	NA	T	T	T	Y	T	H	Y	T	Y	Y	Y	T	T	T	T	Y	Y	T	T	T	T	T	Y	Y	T	T	T	Y	T	T	T	N	Y	T	T	Y	Y	T	T	N	N	T	Y	Y
S231_43543	T/C	231	43543	+	NA	Y	Y	T	Y	Y	T	T	T	Y	T	Y	T	T	T	T	T	T	Y	Y	T	T	T	Y	T	Y	Y	Y	Y	Y	T	Y	Y	Y	T	T	Y	T	T	T	N	H	T	Y	T
S232_3287	A/C	232	3287	+	NA	A	A	M	M	A	M	A	A	A	A	M	A	A	M	A	M	M	A	A	A	M	M	A	A	A	M	M	M	A	M	M	M	M	A	A	A	A	M	A	A	A	M	A	A
S232_60879	T/C	232	60879	+	NA	T	T	Y	Y	T	Y	T	T	T	T	Y	Y	T	T	T	Y	Y	T	T	T	Y	Y	T	T	T	T	Y	Y	T	Y	Y	H	Y	T	T	T	T	T	T	N	T	Y	T	T
S233_3953	T/A	233	3953	+	NA	W	T	W	T	W	N	T	T	T	W	T	T	W	W	N	T	T	T	T	T	W	W	W	T	T	T	T	T	W	T	T	W	W	W	T	T	T	W	T	N	T	N	W	W
S233_122111	T/A	233	122111	+	NA	T	T	W	W	T	W	T	T	T	T	W	W	T	W	T	W	W	T	T	W	W	W	T	T	T	W	W	W	T	W	W	T	T	T	T	T	T	W	T	W	T	H	T	T
S234_9712	T/C	234	9712	+	NA	T	Y	T	T	Y	Y	Y	T	Y	T	T	Y	T	Y	Y	Y	Y	N	T	Y	T	T	Y	Y	T	T	Y	T	T	T	T	T	T	T	Y	Y	Y	Y	T	T	T	T	Y	T
S235_20063	T/C	235	20063	+	NA	T	T	T	Y	T	Y	T	T	T	Y	Y	Y	T	T	Y	Y	Y	T	T	T	Y	T	Y	T	Y	Y	T	Y	T	T	Y	Y	T	T	Y	Y	T	T	T	T	T	T	T	Y
S236_3759	G/A	236	3759	+	NA	G	G	G	R	G	R	G	G	G	R	R	R	G	G	R	R	R	G	G	G	R	G	R	G	R	R	G	R	G	G	R	R	G	G	R	R	G	G	G	G	N	G	G	R
S236_57529	T/C	236	57529	+	NA	T	T	T	Y	Y	Y	T	T	T	Y	Y	Y	T	T	Y	Y	H	N	T	T	Y	T	H	T	N	Y	T	Y	N	T	H	T	T	T	H	Y	T	T	T	Y	N	T	T	Y
S238_249	C/G	238	249	+	NA	C	C	S	C	C	S	S	C	C	S	S	H	S	S	C	S	S	C	C	C	S	S	C	C	S	C	C	C	S	H	C	S	C	S	C	C	C	S	C	S	C	C	C	C
S238_63056	C/T	238	63056	+	NA	C	C	Y	Y	C	Y	C	C	C	C	Y	Y	C	Y	C	Y	Y	C	C	Y	Y	Y	C	C	C	Y	Y	Y	C	Y	Y	Y	Y	C	C	C	C	Y	C	Y	N	Y	C	C
S239_18855	A/G	239	18855	+	NA	A	A	R	A	A	H	R	A	A	R	R	R	R	R	R	R	R	A	A	R	R	R	A	A	R	A	A	A	R	R	A	H	A	R	A	A	A	R	A	A	A	A	A	A
S240_4469	C/T	240	4469	+	NA	Y	C	C	C	Y	C	Y	C	Y	C	C	Y	C	C	C	Y	C	C	C	C	Y	Y	C	C	Y	Y	Y	Y	Y	Y	C	Y	Y	C	C	C	C	Y	C	Y	C	C	C	Y
S240_75778	T/A	240	75778	+	NA	W	T	T	T	W	T	W	T	W	T	T	W	T	T	T	W	T	T	T	T	W	W	T	T	W	W	W	W	W	W	T	W	W	T	T	T	T	W	T	W	T	T	T	W
S241_33101	G/A	241	33101	+	NA	G	G	R	R	G	R	G	R	G	G	R	R	R	G	R	G	G	G	G	R	R	G	R	G	G	R	R	G	R	G	R	R	G	R	R	G	G	R	R	G	G	G	G	R
S242_46037	T/G	242	46037	+	NA	T	T	K	K	T	K	T	T	T	T	T	K	T	K	K	K	K	T	T	T	T	K	T	T	T	K	K	K	T	K	K	K	K	T	T	T	T	T	T	K	T	K	T	T
S243_9909	A/C	243	9909	+	NA	M	A	A	A	A	N	M	A	M	M	M	A	A	M	A	M	A	A	A	A	A	A	M	A	A	A	M	A	A	A	M	A	M	A	M	M	A	M	A	A	M	A	M	M
S244_2126	G/A	244	2126	+	NA	G	G	R	R	G	R	G	R	G	G	R	R	R	G	R	G	G	G	G	R	R	G	R	G	G	R	R	G	R	G	R	R	G	R	R	G	G	R	R	G	G	G	G	R
S244_59492	G/A	244	59492	+	NA	G	G	R	R	G	R	G	R	G	G	R	R	R	G	H	G	G	G	G	H	R	G	H	G	G	R	R	G	R	G	R	G	G	R	R	G	G	H	R	N	G	G	G	R
S247_72712	T/C	247	72712	+	NA	T	Y	T	T	T	T	T	T	Y	H	T	Y	T	Y	Y	T	Y	Y	Y	T	Y	T	T	Y	T	Y	T	T	T	T	T	T	Y	Y	T	T	Y	Y	T	T	T	Y	T	T
S249_26226	C/T	249	26226	+	NA	Y	C	Y	C	Y	C	C	N	Y	Y	C	N	Y	C	C	C	C	N	C	C	Y	Y	N	C	C	C	C	C	Y	C	C	Y	C	Y	C	C	C	Y	C	C	N	C	Y	C
S251_3834	G/A	251	3834	+	NA	G	R	G	G	G	G	R	R	R	R	R	G	G	R	G	R	G	G	G	R	G	G	R	R	R	G	R	G	G	G	R	G	G	G	R	R	G	R	G	G	R	R	R	R
S252_17704	A/G	252	17704	+	NA	A	R	A	A	R	R	R	N	R	R	R	A	R	A	N	R	R	N	R	R	R	A	A	R	R	A	R	R	R	A	A	H	A	R	A	A	A	A	A	H	A	R	R	R
S253_909	C/T	253	909	+	NA	C	Y	C	C	C	C	C	C	C	Y	Y	Y	C	C	Y	C	Y	Y	Y	C	Y	C	C	C	C	Y	C	C	C	C	C	Y	Y	Y	C	C	C	Y	C	C	C	Y	C	C
S253_53492	A/G	253	53492	+	NA	A	R	A	A	A	A	A	A	A	R	R	R	A	A	R	A	R	R	R	A	R	A	A	A	A	R	A	A	A	A	A	R	R	R	A	A	A	R	A	A	A	R	A	A
S254_26337	A/T	254	26337	+	NA	A	W	A	A	A	A	W	W	W	W	A	A	A	W	A	A	A	N	W	A	A	A	W	A	A	A	A	A	W	W	A	A	A	A	W	W	W	A	W	W	A	A	W	A
S259_1576	G/A	259	1576	+	NA	R	R	R	R	G	R	R	G	G	R	G	R	G	R	R	R	R	G	G	G	G	R	G	G	G	G	G	R	G	R	R	G	R	G	G	G	G	G	G	N	R	G	G	R
S260_19976	C/A	260	19976	+	NA	C	C	M	M	C	M	C	C	C	C	M	M	C	M	M	M	M	C	C	C	C	M	C	C	C	M	M	M	C	M	M	M	M	C	C	C	C	C	C	H	C	M	C	C
S261_6042	A/G	261	6042	+	NA	R	R	R	R	A	A	R	A	A	R	R	R	R	R	R	R	R	A	A	R	A	R	A	A	R	R	A	R	R	R	R	R	A	A	A	A	A	R	A	H	A	A	A	A
S262_29078	C/G	262	29078	+	NA	C	C	C	S	S	H	S	C	S	S	S	S	C	C	S	C	S	C	C	C	S	C	S	S	H	C	C	S	C	C	S	H	S	C	S	S	C	C	C	N	C	C	C	S
S265_8018	C/T	265	8018	+	NA	C	C	C	C	H	N	C	C	C	Y	Y	N	C	C	C	Y	Y	C	C	C	Y	C	Y	C	H	Y	C	Y	N	C	Y	N	C	C	Y	Y	C	C	C	H	C	H	C	Y
S265_65355	C/T	265	65355	+	NA	C	C	C	Y	Y	Y	C	C	C	Y	Y	C	C	C	C	Y	H	C	C	C	Y	C	Y	C	Y	Y	C	Y	C	C	C	N	C	C	Y	Y	C	C	C	N	C	Y	C	H
S266_28877	A/G	266	28877	+	NA	A	A	R	R	R	R	R	R	A	A	R	A	R	A	R	A	A	A	A	R	R	A	R	A	A	A	A	A	R	A	R	H	A	R	R	A	A	R	R	A	A	A	A	R
S269_10693	T/G	269	10693	+	NA	K	T	K	T	K	K	K	K	K	T	T	T	K	K	T	T	T	T	T	T	K	K	K	K	K	T	T	T	K	T	T	H	T	K	T	T	T	K	K	T	N	T	K	T
S269_61514	A/C	269	61514	+	NA	M	A	M	A	M	M	M	M	M	A	A	A	M	M	A	A	A	A	A	A	M	M	M	M	M	A	A	A	M	A	A	M	A	M	A	A	A	M	M	M	M	A	M	A
S271_62142	T/C	271	62142	+	NA	T	T	Y	T	T	N	T	Y	T	T	T	Y	Y	T	T	T	T	T	T	Y	T	T	Y	T	T	Y	Y	T	Y	T	Y	Y	T	T	Y	T	T	Y	Y	T	T	T	T	Y
S273_14298	T/C	273	14298	+	NA	T	Y	T	T	Y	H	Y	Y	Y	Y	Y	Y	Y	T	T	Y	T	Y	Y	T	Y	T	T	Y	Y	T	Y	Y	Y	T	T	Y	Y	T	T	T	Y	T	T	T	T	Y	T	H
S273_82186	T/C	273	82186	+	NA	T	Y	T	T	Y	Y	Y	Y	Y	Y	Y	Y	Y	Y	T	Y	T	N	Y	T	Y	T	T	Y	Y	N	Y	Y	Y	N	T	N	Y	T	T	T	Y	T	T	Y	T	H	T	Y
S275_48742	T/G	275	48742	+	NA	T	K	T	K	K	T	K	T	K	K	K	T	T	T	T	K	K	T	T	T	T	T	K	K	T	T	T	K	T	T	T	H	T	T	T	T	K	T	K	T	T	T	K	K
S277_28498	G/C	277	28498	+	NA	S	S	S	S	G	G	S	G	G	S	S	S	S	S	G	S	G	G	G	S	G	G	G	G	S	S	G	S	S	S	G	S	N	G	G	G	G	S	G	G	N	G	G	S
S279_727	G/T	279	727	+	NA	K	K	G	K	G	G	K	G	K	K	K	G	G	K	G	G	G	K	K	G	G	K	G	G	K	G	K	K	K	G	G	K	K	G	G	G	K	K	G	K	K	G	K	K
S282_3186	A/C	282	3186	+	NA	M	M	A	M	A	A	A	M	M	M	A	M	A	A	M	M	M	M	A	A	A	A	A	A	A	M	A	A	A	M	A	A	A	A	A	M	M	A	A	A	A	M	A	A
S283_39610	C/T	283	39610	+	NA	Y	H	C	C	C	C	C	C	Y	Y	H	C	C	Y	C	Y	C	C	C	Y	C	C	Y	Y	Y	C	Y	H	C	C	Y	N	Y	C	Y	Y	C	Y	C	N	Y	C	Y	Y
S284_12074	A/C	284	12074	+	NA	M	M	A	A	M	A	A	A	M	M	M	A	A	M	A	M	A	A	A	M	A	A	M	A	M	A	M	M	M	A	M	H	M	N	M	M	A	M	A	A	M	A	M	M
S284_71007	A/C	284	71007	+	NA	M	M	A	A	M	A	N	A	M	M	M	A	A	M	A	H	A	A	A	M	A	A	M	A	M	A	H	H	M	A	M	M	H	N	M	M	A	M	A	N	H	A	M	H
S285_18700	A/G	285	18700	+	NA	R	A	R	R	A	R	R	A	A	R	A	R	A	R	R	R	R	A	A	A	A	R	A	A	A	H	A	R	A	R	R	R	R	A	A	A	A	A	A	A	R	A	A	R
S287_17516	T/A	287	17516	+	NA	T	T	W	T	T	T	T	W	T	W	W	W	W	W	W	W	W	T	T	T	W	W	T	T	W	T	T	T	W	W	T	W	T	W	T	T	T	W	T	W	T	T	T	T
S288_35016	T/G	288	35016	+	NA	K	K	T	K	T	T	K	T	K	K	K	T	T	K	T	T	K	K	K	T	T	K	T	T	K	T	K	K	K	T	T	K	K	T	T	T	K	K	T	N	H	T	T	K
S289_7575	C/A	289	7575	+	NA	M	C	M	C	M	C	C	M	M	M	C	M	M	C	C	C	M	C	C	C	M	M	M	C	M	C	C	C	C	M	C	M	M	M	C	C	C	M	C	C	M	C	M	M
S290_15623	G/C	290	15623	+	NA	G	S	G	G	S	S	S	G	S	G	G	S	G	S	S	S	S	G	G	G	G	G	S	S	G	G	S	G	G	G	G	G	G	G	S	S	S	S	G	G	G	S	S	G
S293_2835	A/C	293	2835	+	NA	A	A	A	A	M	M	A	M	A	H	A	H	M	M	A	M	M	A	A	A	M	M	A	A	M	A	A	A	M	M	A	A	A	M	A	A	A	M	A	M	A	A	A	A
S294_22085	G/A	294	22085	+	NA	R	R	G	R	G	G	R	G	R	R	R	G	G	G	G	G	R	R	R	G	G	G	G	G	R	G	R	R	R	G	G	R	R	G	G	G	R	R	G	G	R	G	G	R
S295_19848	T/A	295	19848	+	NA	W	W	T	W	W	W	T	T	W	T	W	T	T	W	T	T	T	W	W	T	T	T	T	T	W	W	W	W	W	T	T	W	W	T	T	T	T	T	T	T	W	W	T	T
S295_83539	A/T	295	83539	+	NA	W	W	A	W	W	W	A	A	W	A	W	A	A	W	A	A	A	W	W	A	A	A	A	A	W	W	W	W	W	A	A	H	W	A	A	A	A	A	A	A	H	H	A	A
S296_3761	C/A	296	3761	+	NA	M	M	C	C	M	C	M	C	M	M	M	C	C	C	C	M	C	C	C	C	M	C	C	C	M	M	M	M	M	M	M	H	M	C	C	C	C	M	C	N	C	C	C	M
S297_8840	A/G	297	8840	+	NA	A	R	A	A	A	A	R	A	R	R	A	R	A	R	H	A	H	R	R	A	A	A	A	R	A	R	A	A	A	A	A	A	R	A	A	A	R	R	A	N	A	H	A	A
S298_2974	A/C	298	2974	+	NA	A	M	A	M	M	A	M	A	A	A	M	H	M	A	A	A	A	A	A	A	A	A	M	A	M	M	A	A	M	A	M	A	M	A	A	A	A	A	A	A	N	A	M	A
S299_50510	G/C	299	50510	+	NA	G	S	G	G	G	G	S	G	S	S	G	H	S	S	H	G	S	S	S	G	G	G	S	S	G	S	G	G	G	G	G	N	G	G	S	S	S	S	G	N	G	S	H	G
S300_22450	T/C	300	22450	+	NA	T	Y	T	Y	Y	T	Y	T	Y	Y	Y	T	T	T	T	Y	Y	T	T	T	T	T	Y	Y	T	T	T	Y	T	T	T	Y	T	T	T	T	Y	T	Y	T	T	T	Y	Y
S303_35456	A/C	303	35456	+	NA	A	A	A	M	M	N	M	A	H	A	M	A	A	A	N	H	M	N	A	A	A	A	M	M	A	A	A	M	A	A	A	A	M	A	A	M	M	N	A	N	N	A	M	H
S304_16250	T/C	304	16250	+	NA	Y	T	Y	T	Y	Y	Y	T	Y	T	T	T	Y	Y	T	T	T	T	T	T	Y	Y	Y	H	Y	T	T	T	Y	Y	T	T	T	Y	T	T	T	Y	T	N	Y	T	Y	T
S304_66298	A/G	304	66298	+	NA	R	A	R	A	R	A	R	R	R	A	A	A	R	R	A	A	A	A	A	A	R	R	R	R	R	A	A	A	R	H	A	R	A	H	A	A	A	R	R	R	R	A	R	A
S306_18427	T/A	306	18427	+	NA	T	T	W	T	T	W	T	W	T	W	W	W	W	W	W	W	W	T	T	T	W	W	T	T	W	T	T	T	W	W	T	T	T	W	T	T	T	W	T	W	T	T	T	T
S307_8115	G/A	307	8115	+	NA	G	R	G	R	R	G	R	G	G	G	R	R	R	G	G	G	G	N	G	G	G	G	R	G	R	R	G	G	R	G	R	R	G	G	G	G	G	G	G	G	H	G	R	G
S310_9649	C/T	310	9649	+	NA	Y	Y	C	C	C	Y	Y	Y	Y	Y	Y	C	C	Y	C	Y	C	C	C	Y	C	C	Y	Y	Y	C	Y	C	C	C	Y	C	C	C	Y	Y	C	Y	C	C	Y	N	Y	Y
S312_62323	A/G	312	62323	+	NA	A	A	R	R	A	R	A	A	A	A	R	R	A	R	A	R	R	A	A	R	R	R	A	A	A	R	R	R	A	R	R	R	R	A	A	A	A	R	A	R	A	R	A	A
S313_25243	A/G	313	25243	+	NA	A	R	R	R	R	R	R	R	A	A	R	A	R	A	A	A	A	A	A	R	R	R	R	A	A	A	A	A	R	A	R	R	A	R	R	A	A	R	R	A	A	A	A	R
S314_5595	A/T	314	5595	+	NA	A	W	A	A	W	A	W	A	W	W	W	A	A	A	A	W	W	A	A	A	A	A	W	A	A	A	A	W	A	A	A	A	A	A	A	A	W	A	W	N	A	A	W	A
S321_6860	T/G	321	6860	+	NA	T	T	T	K	K	H	T	T	T	K	K	K	T	T	T	K	T	T	T	T	K	T	K	T	T	K	T	K	T	T	K	T	K	T	K	K	T	T	T	K	T	K	T	K
S321_67332	A/T	321	67332	+	NA	A	W	A	A	A	H	W	W	A	W	H	A	W	A	N	W	N	A	A	A	A	A	A	A	A	A	W	W	W	A	A	A	A	A	A	A	A	A	A	W	H	A	A	A
S323_9595	G/A	323	9595	+	NA	G	G	R	G	G	R	G	R	G	R	G	R	R	G	G	G	G	G	G	R	G	G	R	G	G	G	R	G	R	G	R	H	R	N	H	G	G	H	G	N	G	G	G	R
S324_26271	G/C	324	26271	+	NA	S	S	S	S	G	N	S	G	G	S	S	S	S	S	G	S	S	G	G	G	G	G	G	G	S	H	G	S	S	S	S	N	G	G	G	G	G	G	G	H	N	G	G	G
S326_1215	T/A	326	1215	+	NA	T	T	T	W	W	W	T	T	T	W	W	W	T	T	T	W	W	N	T	T	W	T	T	T	W	W	T	W	T	T	W	T	T	T	W	W	T	T	T	N	T	W	T	W
S327_23728	G/A	327	23728	+	NA	G	G	G	R	R	R	R	G	R	R	R	G	G	G	R	R	R	G	G	G	G	G	R	R	G	G	G	R	G	G	G	R	R	G	G	R	R	G	G	G	G	G	R	R
S328_9555	T/C	328	9555	+	NA	Y	Y	Y	Y	T	T	Y	T	Y	Y	Y	T	T	Y	T	T	T	Y	Y	T	T	H	T	T	T	T	Y	Y	T	T	T	N	Y	T	T	T	Y	Y	T	N	N	T	Y	Y
S328_62231	C/G	328	62231	+	NA	S	S	S	S	C	C	S	C	S	S	S	C	C	S	C	C	C	S	S	C	C	S	C	C	S	C	S	S	C	C	C	H	S	C	C	C	S	S	C	S	N	C	S	S
S329_33429	G/T	329	33429	+	NA	G	G	G	K	G	K	K	G	K	K	K	K	G	G	K	G	K	G	G	G	K	G	K	K	K	G	G	K	G	G	K	K	G	G	K	K	G	G	G	G	G	G	G	K
S331_29960	T/C	331	29960	+	NA	T	Y	T	T	T	T	Y	Y	Y	T	T	T	T	Y	T	T	T	Y	Y	T	T	T	Y	T	T	T	T	T	Y	Y	T	T	T	T	Y	Y	Y	T	Y	T	T	T	Y	T
S332_49125	C/T	332	49125	+	NA	Y	C	Y	C	Y	C	C	Y	Y	Y	C	Y	Y	Y	C	C	C	C	C	C	Y	Y	Y	C	Y	C	C	C	Y	Y	C	H	C	Y	C	C	C	Y	Y	C	Y	C	Y	C
S333_10574	G/A	333	10574	+	NA	G	R	G	G	G	G	R	R	R	R	G	G	G	R	G	G	G	H	R	G	G	G	R	G	G	G	G	G	R	R	G	G	G	G	R	R	G	G	R	G	G	G	R	G
S334_31061	C/T	334	31061	+	NA	C	C	C	Y	Y	Y	Y	C	Y	Y	Y	C	C	C	H	Y	Y	C	C	C	C	C	Y	Y	C	C	C	Y	C	C	C	Y	Y	C	C	Y	Y	C	C	C	N	C	Y	Y
S335_10856	G/C	335	10856	+	NA	G	S	G	G	G	G	G	G	S	S	G	S	G	S	S	G	S	S	S	G	S	G	G	S	G	S	G	G	G	G	G	G	S	S	G	G	S	S	G	G	G	S	G	G
S335_62215	C/A	335	62215	+	NA	C	M	C	C	C	C	C	C	M	M	C	M	C	M	M	C	M	M	M	C	M	C	C	M	C	M	C	C	C	C	C	C	M	M	C	C	M	M	C	C	C	C	C	C
S336_30203	C/T	336	30203	+	NA	C	C	C	Y	C	C	Y	C	C	Y	Y	Y	Y	Y	C	Y	C	C	C	Y	Y	Y	C	C	Y	C	C	C	Y	Y	C	C	C	C	C	C	C	Y	C	C	N	C	C	C
S340_635	T/C	340	635	+	NA	Y	Y	T	Y	T	T	Y	T	Y	Y	Y	T	T	Y	T	T	T	Y	Y	T	T	Y	T	T	Y	T	Y	Y	T	T	T	Y	Y	T	T	T	Y	Y	T	T	Y	T	Y	Y
S340_54110	A/G	340	54110	+	NA	R	R	A	R	A	A	R	A	R	A	R	A	A	R	A	A	A	R	R	A	A	R	A	A	R	A	R	R	R	A	A	R	R	A	A	A	R	R	A	A	R	A	R	R
S343_15338	A/T	343	15338	+	NA	A	W	A	A	A	A	W	A	W	W	A	W	A	W	W	A	W	W	W	A	A	A	A	W	A	W	A	A	A	A	A	A	A	A	A	A	W	W	A	A	A	W	A	A
S344_14673	A/T	344	14673	+	NA	W	W	W	W	A	W	W	A	A	W	W	N	A	W	N	A	A	W	W	A	A	W	A	A	W	A	W	W	A	A	A	H	A	A	N	A	W	W	A	N	A	A	W	W
S345_13817	T/G	345	13817	+	NA	T	K	T	T	T	T	K	K	K	K	K	N	T	K	T	K	T	T	T	K	T	T	K	K	K	T	K	T	T	T	K	T	T	T	K	K	T	K	T	N	N	K	K	H
S345_64048	T/G	345	64048	+	NA	T	K	T	T	T	T	K	K	K	K	K	T	T	K	T	K	K	T	T	K	T	T	K	K	K	T	K	T	T	T	K	T	T	T	K	K	T	K	T	T	T	K	K	K
S346_3563	G/A	346	3563	+	NA	R	G	R	G	R	R	R	G	R	G	G	G	R	R	R	G	G	G	G	G	G	R	R	R	R	G	G	G	R	G	G	R	G	G	G	R	G	R	R	G	G	R	R	G
S346_60312	C/T	346	60312	+	NA	Y	C	Y	C	Y	H	C	C	Y	C	C	C	Y	Y	Y	C	C	N	C	C	C	Y	Y	C	Y	C	C	C	Y	C	C	H	C	N	C	Y	C	Y	Y	N	N	H	Y	C
S348_8945	G/A	348	8945	+	NA	G	G	H	R	G	N	G	G	G	G	R	R	G	R	R	R	R	G	G	G	G	R	G	G	G	R	R	R	G	H	R	R	R	G	G	G	G	R	G	G	N	R	G	G
S348_71011	G/C	348	71011	+	NA	G	G	S	S	G	S	G	G	G	G	S	S	G	S	S	S	S	G	G	G	G	S	G	G	G	S	S	S	G	S	S	S	S	G	G	G	G	S	G	S	G	S	G	G
S349_32889	A/G	349	32889	+	NA	R	R	R	R	A	A	R	A	A	R	R	R	R	R	A	R	A	A	A	R	A	R	A	A	H	H	A	A	R	R	R	N	A	A	A	A	A	R	A	H	H	A	A	A
S350_39492	A/G	350	39492	+	NA	R	A	A	A	R	N	R	H	R	R	A	A	A	R	A	A	A	A	A	R	A	R	R	A	N	R	A	A	R	N	A	N	A	A	R	R	R	A	R	H	N	A	R	A
S351_3669	G/A	351	3669	+	NA	G	G	R	R	G	R	G	R	G	G	R	R	R	G	R	G	G	G	G	R	R	G	R	G	G	R	R	G	R	G	R	R	G	R	R	G	G	R	R	G	G	G	G	R
S352_7190	C/T	352	7190	+	NA	C	Y	Y	Y	C	C	Y	C	Y	C	C	C	C	Y	N	C	C	Y	Y	C	C	Y	C	C	C	C	Y	Y	C	C	C	N	Y	C	C	C	Y	Y	C	N	Y	N	H	C
S352_80658	A/G	352	80658	+	NA	R	R	R	R	A	R	R	A	R	R	R	A	A	H	A	A	A	R	R	A	A	R	A	A	A	A	R	R	A	A	A	H	R	A	A	A	H	R	A	N	N	A	R	R
S353_25316	C/A	353	25316	+	NA	C	M	M	M	M	M	M	M	C	C	M	C	M	C	M	C	C	C	C	M	M	C	M	C	C	C	C	C	M	C	M	M	C	M	M	C	C	M	M	C	C	C	C	M
S355_37695	A/G	355	37695	+	NA	R	R	R	R	R	R	R	A	R	R	R	R	A	A	A	A	R	R	R	A	A	R	A	A	A	H	R	R	A	A	R	H	A	A	A	A	R	R	A	R	A	A	R	R
S357_4960	A/G	357	4960	+	NA	R	A	A	A	R	A	R	A	R	R	R	R	A	A	A	R	A	A	A	A	R	A	A	A	R	R	R	R	R	R	R	R	R	A	A	A	A	R	A	R	A	A	A	R
S358_28028	T/C	358	28028	+	NA	T	T	Y	Y	T	Y	T	T	T	T	T	Y	T	Y	Y	Y	Y	T	T	T	T	Y	T	T	T	Y	Y	Y	T	Y	Y	Y	Y	T	T	T	T	T	T	Y	T	T	T	T
S359_6825	G/T	359	6825	+	NA	K	G	G	G	K	G	G	G	K	K	K	G	G	G	G	H	G	N	G	K	G	G	K	G	G	K	K	K	K	G	K	G	K	G	K	K	G	K	G	H	K	G	K	H
S361_6701	A/T	361	6701	+	NA	A	A	W	W	A	H	A	A	A	A	A	W	A	H	W	W	H	A	A	A	A	W	A	A	A	W	A	W	A	W	W	W	W	A	A	A	A	A	A	N	N	A	A	A
S361_57330	C/G	361	57330	+	NA	C	C	S	S	C	S	C	C	C	C	C	S	C	S	C	S	S	C	C	C	C	H	C	C	C	S	C	S	C	S	S	S	S	C	C	C	C	C	C	N	C	C	C	C
S364_20986	G/T	364	20986	+	NA	G	K	G	G	H	H	K	K	G	G	K	G	K	G	G	K	K	K	K	K	K	G	G	K	K	G	K	K	K	G	G	H	G	K	G	G	G	G	G	H	G	N	K	K
S365_41022	T/G	365	41022	+	NA	T	K	T	T	K	T	K	K	K	K	T	T	T	K	T	T	T	T	T	T	T	T	K	T	T	K	T	T	K	K	T	T	T	T	K	K	K	T	K	T	T	T	K	T
S366_2295	C/T	366	2295	+	NA	Y	C	Y	C	Y	C	C	Y	Y	Y	C	Y	Y	Y	C	C	C	C	C	C	Y	Y	Y	C	Y	C	C	C	Y	Y	C	Y	C	Y	C	C	C	Y	Y	Y	Y	C	Y	C
S367_14329	A/C	367	14329	+	NA	M	M	M	M	A	M	M	A	A	M	M	H	M	M	M	M	M	A	A	M	M	M	A	A	H	M	A	A	M	M	M	M	A	M	A	A	A	M	A	N	N	A	A	A
S368_15731	A/G	368	15731	+	NA	A	A	A	R	R	A	R	A	R	R	R	A	A	A	R	R	R	A	A	A	A	A	R	R	A	A	A	R	A	A	A	A	R	A	A	R	R	A	A	R	A	A	R	H
S374_9019	G/A	374	9019	+	NA	R	R	G	R	G	G	R	G	R	G	G	G	G	R	G	G	R	G	R	G	G	R	G	G	R	G	R	R	R	G	G	G	R	G	G	G	R	R	G	R	H	G	G	R
S375_2087	T/C	375	2087	+	NA	T	Y	T	T	T	T	T	T	T	T	Y	Y	T	T	Y	T	Y	Y	Y	T	Y	T	T	T	T	Y	T	T	T	T	T	T	Y	Y	T	T	T	Y	T	T	T	Y	T	T
S376_8084	A/G	376	8084	+	NA	A	A	A	R	R	R	A	A	A	R	R	A	A	A	H	H	R	A	A	A	R	A	R	A	R	R	A	H	A	A	R	R	R	A	R	R	A	A	A	H	A	A	A	A
S378_29971	G/T	378	29971	+	NA	G	G	G	G	K	G	G	K	K	G	G	G	G	K	G	K	G	G	G	K	G	G	K	G	G	K	G	G	K	H	G	G	G	G	K	G	K	G	K	K	G	G	K	G
S379_11443	G/A	379	11443	+	NA	G	G	R	R	G	G	G	G	G	G	R	R	G	R	G	R	R	G	G	G	R	R	G	G	G	R	R	R	G	R	R	R	R	G	G	G	G	R	G	N	G	R	G	G
S380_8107	T/C	380	8107	+	NA	T	Y	Y	Y	Y	T	Y	Y	T	T	Y	T	Y	T	Y	T	T	T	T	Y	Y	Y	Y	T	T	T	T	T	Y	T	Y	Y	T	H	Y	T	T	Y	H	T	N	T	T	Y
S380_67302	C/T	380	67302	+	NA	C	Y	H	C	Y	N	Y	Y	C	C	Y	C	Y	C	Y	C	C	C	C	Y	Y	Y	Y	C	C	C	C	C	Y	C	Y	C	C	C	Y	C	C	Y	Y	C	C	C	C	Y
S381_34117	G/C	381	34117	+	NA	S	S	G	S	S	G	G	G	G	G	S	S	S	G	G	G	G	N	G	G	G	G	S	G	S	S	G	G	G	G	S	S	S	G	G	G	G	G	G	N	S	G	S	G
S382_12822	C/T	382	12822	+	NA	C	Y	C	C	Y	C	Y	Y	Y	Y	C	C	C	Y	C	C	C	C	C	C	C	C	Y	C	C	C	C	C	Y	Y	C	C	C	C	Y	Y	Y	C	Y	Y	C	C	Y	C
S384_1118	T/G	384	1118	+	NA	T	T	T	K	K	T	K	T	K	K	K	N	T	T	K	K	K	T	T	T	T	T	K	K	T	T	T	K	T	T	T	N	T	T	T	T	H	T	T	T	T	T	K	K
S385_7948	G/A	385	7948	+	NA	G	G	G	R	R	R	G	G	G	R	R	R	G	G	G	R	R	G	G	G	R	G	R	G	R	R	G	R	G	G	R	G	G	G	R	R	G	G	G	R	G	R	G	R
S386_8939	G/A	386	8939	+	NA	R	R	R	R	G	G	R	G	G	R	R	R	R	R	R	R	R	G	G	R	G	R	G	G	R	R	G	R	R	R	R	H	G	G	G	G	G	R	G	R	R	G	G	R
S387_6276	A/C	387	6276	+	NA	M	A	A	A	M	A	M	A	M	M	M	M	A	A	A	M	A	A	A	A	M	M	A	A	M	M	M	M	M	M	A	M	M	N	A	A	A	M	A	M	A	A	A	M
S388_2626	A/G	388	2626	+	NA	A	R	A	A	R	R	R	R	A	A	R	A	R	A	H	R	R	R	R	R	R	A	A	H	R	A	R	R	R	A	A	A	A	H	A	A	A	A	A	H	N	R	R	R
S388_52999	T/C	388	52999	+	NA	Y	Y	Y	Y	T	N	Y	T	Y	Y	Y	T	T	Y	T	T	T	Y	Y	T	T	Y	T	T	Y	T	Y	Y	T	T	T	N	Y	T	T	T	Y	Y	T	H	T	T	Y	T
S395_33666	C/T	395	33666	+	NA	C	Y	C	C	C	C	C	C	Y	Y	C	Y	C	Y	Y	C	Y	Y	Y	C	Y	C	C	Y	C	Y	C	C	C	C	C	C	Y	Y	C	C	Y	Y	C	C	C	Y	C	C
S396_10413	G/A	396	10413	+	NA	R	R	R	R	G	G	R	G	G	R	R	R	R	R	G	R	G	G	G	R	G	R	G	G	R	R	G	R	R	R	R	R	G	G	G	G	G	R	G	H	R	G	G	H
S397_1621	A/G	397	1621	+	NA	A	R	N	R	R	R	R	R	A	A	R	A	A	A	A	R	R	R	R	R	R	A	A	R	R	A	R	R	R	A	A	N	A	H	A	A	A	A	A	A	N	A	H	A
S398_10631	A/C	398	10631	+	NA	A	M	A	M	A	H	M	A	A	A	A	A	A	A	H	M	M	M	M	M	M	A	A	M	H	A	M	M	M	N	A	A	A	M	A	A	N	A	A	N	N	N	M	A
S399_24394	A/G	399	24394	+	NA	R	A	A	A	R	N	A	A	R	A	A	H	R	R	A	A	A	A	A	A	R	R	R	A	N	A	A	A	R	H	A	A	R	R	A	A	A	R	A	H	R	A	R	R
S401_33462	T/C	401	33462	+	NA	T	T	Y	Y	T	Y	T	T	T	T	Y	Y	T	Y	T	Y	Y	T	T	Y	Y	Y	T	T	T	Y	Y	Y	T	Y	Y	Y	T	T	T	T	T	Y	T	T	T	Y	T	T
S404_32370	A/T	404	32370	+	NA	A	A	W	W	A	W	A	A	A	A	W	W	A	W	A	W	W	A	A	W	W	W	A	A	A	A	W	W	A	W	W	W	W	A	A	A	A	W	A	W	N	W	A	A
S405_5541	T/C	405	5541	+	NA	T	Y	T	T	Y	Y	Y	T	Y	T	T	Y	T	Y	Y	Y	Y	T	T	Y	T	T	Y	Y	T	T	Y	T	T	T	T	T	T	T	Y	Y	Y	Y	T	T	T	Y	Y	T
S405_57021	T/C	405	57021	+	NA	T	Y	T	T	Y	Y	Y	T	Y	T	T	Y	T	Y	Y	Y	Y	T	T	Y	T	T	Y	Y	T	T	Y	T	T	T	T	T	T	T	Y	Y	Y	Y	T	N	T	Y	Y	T
S406_22099	T/A	406	22099	+	NA	T	T	T	W	W	T	T	T	T	W	W	W	T	T	H	W	W	T	T	T	W	T	W	T	W	T	T	W	T	T	W	N	W	T	W	W	T	T	T	H	T	T	T	H
S408_16053	G/C	408	16053	+	NA	G	G	S	S	G	S	G	G	G	G	S	S	G	S	G	S	S	G	G	S	S	S	G	G	G	S	S	S	G	S	S	S	G	G	G	G	G	S	G	S	G	S	G	G
S409_41038	C/A	409	41038	+	NA	C	C	M	M	C	M	C	M	C	C	M	M	M	C	M	C	C	C	C	M	C	C	M	C	C	M	M	C	M	C	M	N	C	C	M	C	C	M	M	C	C	C	C	M
S410_10991	C/A	410	10991	+	NA	M	M	M	M	C	C	M	C	M	M	M	C	C	M	C	C	C	M	M	C	C	C	C	C	M	C	M	M	C	C	C	H	C	C	C	C	M	M	C	H	M	C	M	M
S412_1963	A/G	412	1963	+	NA	A	R	A	A	A	N	A	A	R	R	A	R	A	R	R	A	R	A	R	A	R	A	A	R	A	R	A	A	A	A	A	A	R	H	A	A	R	R	A	N	A	R	A	A
S414_13356	G/A	414	13356	+	NA	G	R	G	R	G	R	R	R	G	G	G	G	G	G	R	R	R	R	R	R	R	G	G	R	R	G	R	R	R	G	G	G	G	R	G	G	G	G	G	R	G	R	R	G
S414_63910	T/G	414	63910	+	NA	T	T	K	K	T	K	T	T	T	T	T	K	T	K	K	K	K	T	T	T	T	K	T	T	T	K	H	K	T	T	K	K	K	T	N	T	T	T	T	H	T	N	T	T
S415_35342	C/T	415	35342	+	NA	C	Y	C	C	Y	Y	Y	Y	C	C	Y	C	Y	C	Y	Y	Y	Y	Y	Y	Y	C	C	Y	Y	C	Y	Y	Y	C	C	Y	C	Y	C	C	C	C	C	Y	N	Y	Y	C
S416_12024	A/G	416	12024	+	NA	A	A	A	R	R	R	R	A	R	R	R	A	A	A	R	A	R	A	A	A	R	A	R	A	A	A	A	R	A	A	R	H	R	A	A	R	A	A	A	A	A	A	A	R
S417_5431	A/G	417	5431	+	NA	R	R	R	A	A	A	A	R	R	R	A	A	R	A	A	A	R	A	A	R	A	A	A	R	A	A	R	A	R	R	A	A	A	A	R	A	A	A	R	A	R	A	A	A
S418_41589	T/C	418	41589	+	NA	T	T	T	Y	Y	Y	Y	T	Y	Y	Y	T	T	T	Y	T	Y	T	T	T	Y	T	Y	Y	T	T	T	Y	T	T	Y	H	Y	T	T	Y	T	T	T	Y	T	T	T	Y
S420_12128	A/G	420	12128	+	NA	A	A	R	A	R	R	A	R	A	R	A	R	R	R	R	R	R	A	A	A	R	R	A	A	R	A	A	A	R	R	A	A	A	R	A	A	A	R	A	R	A	A	A	A
S421_4007	A/G	421	4007	+	NA	A	R	R	R	R	A	R	R	A	A	R	A	R	A	R	A	A	A	A	A	R	R	R	A	R	A	A	R	R	A	R	R	A	R	R	A	A	R	R	A	A	A	A	R
S423_8252	G/T	423	8252	+	NA	K	G	G	K	G	G	G	G	G	G	K	G	G	G	G	K	K	G	K	G	G	G	K	G	K	G	K	G	G	K	K	G	G	K	G	G	K	K	G	N	G	K	G	G
S424_8259	T/C	424	8259	+	NA	Y	Y	T	Y	Y	Y	T	T	Y	T	Y	Y	T	Y	T	T	N	Y	H	T	T	N	Y	T	T	H	Y	Y	Y	T	T	T	Y	T	T	Y	T	T	T	T	T	T	T	T
S429_22683	G/T	429	22683	+	NA	G	K	G	G	K	K	K	H	K	K	K	K	K	G	G	K	K	G	K	G	K	G	G	H	K	G	K	K	K	G	G	N	K	K	G	G	K	G	G	G	G	H	K	K
S430_11901	C/T	430	11901	+	NA	C	Y	C	C	Y	C	Y	Y	Y	Y	C	C	C	Y	C	C	C	C	C	C	C	C	Y	C	C	C	C	C	Y	Y	C	C	C	C	Y	Y	Y	C	Y	N	C	C	Y	C
S431_20164	G/A	431	20164	+	NA	R	G	G	G	R	G	G	G	R	G	G	G	R	R	G	G	G	G	G	G	R	R	R	R	R	G	G	G	R	R	G	H	G	G	G	G	G	R	R	N	R	G	H	G
S431_74638	C/G	431	74638	+	NA	S	C	S	C	S	C	C	S	S	C	C	C	S	S	C	C	C	C	C	C	S	S	S	S	S	C	C	C	S	S	C	H	C	S	C	C	C	S	S	S	N	C	S	C
S432_3266	T/C	432	3266	+	NA	T	T	T	Y	Y	Y	T	T	T	Y	Y	Y	T	T	Y	Y	Y	T	T	T	Y	T	Y	T	Y	Y	T	Y	T	T	Y	Y	Y	T	Y	Y	T	T	T	Y	T	T	T	Y
S433_5584	A/C	433	5584	+	NA	M	M	A	M	M	M	A	A	M	A	M	A	A	M	A	A	A	M	M	A	A	A	A	A	M	M	M	M	M	A	A	M	M	A	A	A	A	A	A	A	M	M	A	A
S433_56192	T/A	433	56192	+	NA	W	H	T	W	W	H	T	T	W	T	W	N	T	T	T	T	T	W	W	T	T	T	T	T	T	W	W	W	W	T	T	H	W	T	T	T	T	T	T	N	T	T	T	T
S434_13388	T/A	434	13388	+	NA	T	T	T	W	W	W	T	T	T	T	T	T	W	W	W	T	T	T	T	T	T	W	W	W	W	T	T	T	T	T	W	W	T	T	W	W	T	W	W	W	T	H	W	T
S435_10490	A/T	435	10490	+	NA	W	A	W	A	W	W	W	W	W	A	A	A	W	W	A	A	A	A	A	A	W	W	W	W	W	A	A	A	W	A	A	W	A	W	A	A	A	W	W	W	W	A	W	A
S440_2053	A/C	440	2053	+	NA	M	A	M	A	M	A	A	M	M	M	A	M	M	A	A	A	M	A	A	A	M	A	M	A	M	A	A	A	M	M	A	M	M	M	A	A	A	M	A	M	M	A	M	M
S441_4617	A/G	441	4617	+	NA	R	A	R	A	R	R	R	R	R	A	A	A	R	R	A	A	A	A	A	A	R	R	R	R	R	A	A	A	R	A	A	R	A	R	A	A	A	R	R	R	R	A	R	A
S441_56338	A/G	441	56338	+	NA	R	A	R	A	R	H	R	R	R	A	A	A	R	R	A	A	A	A	A	A	R	R	R	R	R	A	A	A	R	A	A	R	A	R	A	A	A	R	R	N	R	A	R	A
S444_10773	C/T	444	10773	+	NA	Y	C	Y	C	Y	C	C	Y	Y	Y	C	Y	Y	Y	C	C	Y	C	C	C	Y	Y	Y	C	Y	C	C	C	Y	Y	C	Y	Y	Y	C	C	C	C	C	C	H	C	C	C
S445_5655	C/T	445	5655	+	NA	Y	Y	C	Y	Y	C	C	C	Y	C	Y	Y	C	C	C	C	C	C	C	C	C	C	Y	C	Y	Y	Y	Y	Y	C	Y	Y	Y	C	C	C	C	C	C	C	Y	C	Y	C
S445_59463	C/T	445	59463	+	NA	Y	Y	C	Y	C	C	C	C	C	C	Y	Y	C	C	C	C	C	C	C	C	C	C	Y	C	Y	Y	Y	Y	C	C	Y	C	Y	C	C	C	C	C	C	C	Y	C	C	C
S446_3426	T/C	446	3426	+	NA	T	T	T	Y	Y	T	T	T	T	Y	Y	T	T	T	Y	T	T	T	T	T	Y	T	Y	T	Y	Y	T	Y	T	T	Y	Y	Y	T	Y	Y	T	T	T	H	T	T	T	Y
S447_17978	C/G	447	17978	+	NA	C	C	S	C	C	S	S	C	C	S	S	S	S	S	S	S	C	C	C	S	S	S	C	C	S	C	C	C	S	S	C	S	C	S	C	C	C	S	C	C	C	C	C	C
S448_24135	T/C	448	24135	+	NA	T	Y	T	T	Y	T	Y	Y	T	T	Y	T	Y	T	Y	Y	Y	Y	Y	Y	Y	T	T	Y	Y	T	T	Y	Y	T	T	H	T	N	T	T	T	T	T	N	T	Y	Y	Y
S449_10352	C/T	449	10352	+	NA	Y	Y	C	C	Y	C	C	C	Y	Y	Y	C	C	C	C	Y	C	C	C	Y	C	C	Y	Y	H	C	Y	Y	C	C	Y	C	H	C	Y	Y	C	Y	C	C	N	C	Y	Y
S451_5149	T/A	451	5149	+	NA	T	W	T	T	T	T	W	H	W	W	T	T	T	T	T	T	N	W	T	T	T	T	W	T	T	T	T	T	W	N	T	T	T	T	W	W	W	T	W	N	T	T	W	T
S452_9347	T/G	452	9347	+	NA	T	K	K	T	K	H	K	K	T	T	K	T	K	T	T	K	K	K	K	K	K	T	T	K	K	T	K	K	K	T	T	K	T	T	T	T	T	T	T	H	T	N	K	K
S453_19393	G/A	453	19393	+	NA	G	R	G	G	G	R	R	G	R	G	G	R	R	R	R	G	R	G	G	G	G	G	R	R	G	G	R	G	G	G	G	G	G	G	R	R	R	R	G	G	G	R	R	G
S455_11310	T/A	455	11310	+	NA	T	T	W	W	T	W	W	W	T	T	W	T	W	T	W	T	T	T	T	W	W	T	W	T	T	T	T	T	W	T	W	W	T	W	W	T	T	W	W	T	T	T	T	W
S456_26761	T/C	456	26761	+	NA	T	Y	T	Y	T	N	Y	Y	T	T	T	T	T	T	Y	T	T	Y	Y	Y	Y	T	Y	Y	Y	Y	T	Y	Y	Y	T	T	T	Y	H	Y	T	T	Y	Y	T	Y	T	T
S458_10110	T/G	458	10110	+	NA	T	T	K	T	T	T	K	T	T	K	K	K	K	K	K	K	K	T	T	K	K	K	T	T	K	T	T	T	K	K	T	T	T	K	T	T	T	K	T	H	T	T	T	T
S458_72422	T/C	458	72422	+	NA	T	T	Y	T	T	Y	Y	T	T	Y	Y	Y	Y	Y	Y	Y	Y	T	T	Y	Y	Y	T	T	Y	T	T	T	Y	Y	T	Y	T	Y	T	T	T	Y	T	H	T	T	T	T
S459_44827	G/A	459	44827	+	NA	R	R	G	G	R	G	G	G	R	G	R	R	G	G	G	R	G	G	G	R	G	G	R	G	R	G	R	R	R	G	R	R	G	G	R	R	G	R	G	G	H	G	R	R
S460_18654	T/G	460	18654	+	NA	T	T	K	K	T	T	K	T	T	T	K	T	K	T	K	T	T	T	T	K	K	T	K	T	T	T	T	T	K	T	K	T	T	K	K	K	T	K	K	T	T	T	T	K
S460_69495	G/A	460	69495	+	NA	G	G	R	R	G	R	R	R	G	G	R	G	R	G	R	G	G	G	G	G	R	G	R	G	G	G	G	G	R	G	H	H	G	N	R	G	G	R	R	N	G	G	G	R
S462_32843	A/C	462	32843	+	NA	M	M	M	M	A	M	M	A	A	M	A	A	A	M	H	M	M	A	A	A	A	A	A	A	A	M	A	M	A	M	M	A	M	A	A	A	A	A	A	M	M	A	A	A
S463_2173	T/C	463	2173	+	NA	Y	Y	T	Y	Y	T	T	T	Y	T	Y	H	T	T	T	T	T	T	T	T	T	T	Y	T	Y	Y	T	Y	Y	T	Y	T	Y	T	T	Y	T	T	T	T	N	T	Y	T
S464_34940	C/G	464	34940	+	NA	C	C	C	S	C	S	C	C	C	C	S	S	C	S	C	H	S	C	C	C	S	S	C	C	C	S	S	S	C	S	S	H	S	C	C	C	C	S	C	S	C	S	C	C
S465_9539	A/G	465	9539	+	NA	A	R	A	A	R	R	R	N	R	R	R	A	R	A	H	H	R	A	H	R	R	A	A	H	R	A	R	R	R	A	A	A	A	R	A	A	N	A	A	A	R	R	R	A
S466_11139	A/G	466	11139	+	NA	A	A	R	R	A	R	A	A	A	A	A	R	A	R	R	R	R	A	A	A	A	R	A	A	A	R	A	R	A	R	R	R	R	A	A	A	A	A	A	R	A	A	A	A
S467_20681	G/T	467	20681	+	NA	K	K	G	K	G	G	G	G	G	G	K	H	G	K	G	G	G	G	G	G	G	G	K	G	K	K	K	K	G	G	G	G	K	G	G	K	G	G	G	G	K	G	G	G
S470_14639	C/T	470	14639	+	NA	Y	Y	Y	Y	C	Y	Y	C	C	Y	C	Y	C	Y	Y	Y	Y	C	C	C	C	Y	C	C	C	C	C	Y	C	Y	Y	Y	Y	C	C	C	C	C	C	Y	Y	C	C	Y
S471_548	C/A	471	548	+	NA	C	C	C	C	M	C	C	M	M	M	C	C	C	M	C	C	C	C	C	M	C	C	C	C	C	M	C	C	M	N	C	C	C	C	M	M	M	C	M	N	N	C	M	C
S474_3085	G/A	474	3085	+	NA	R	R	G	R	R	G	G	G	R	G	R	R	G	G	G	G	G	R	R	G	G	G	R	G	R	R	R	G	R	G	G	G	G	G	G	R	G	G	G	N	R	G	G	G
S476_66680	G/C	476	66680	+	NA	S	S	S	S	G	S	S	G	S	S	S	G	G	G	G	G	G	S	S	G	G	S	G	G	S	G	S	S	G	G	G	S	S	G	G	G	H	S	G	S	G	G	S	S
S478_9355	A/G	478	9355	+	NA	A	A	R	A	R	R	A	R	A	R	A	R	R	R	R	R	R	A	A	A	R	R	A	A	R	A	A	A	R	R	A	N	A	A	A	A	A	R	A	A	A	N	A	A
S480_16335	A/G	480	16335	+	NA	A	A	R	R	A	A	R	A	A	R	A	R	A	R	R	R	R	A	A	A	A	R	A	A	A	R	A	R	A	R	R	R	R	A	A	A	A	A	A	H	A	A	A	A
S481_55504	A/T	481	55504	+	NA	W	A	W	W	W	A	A	A	A	W	W	W	W	A	A	W	A	A	A	W	A	W	A	A	W	W	A	W	W	W	A	W	W	A	A	A	A	W	A	A	H	W	A	W
S483_8022	T/C	483	8022	+	NA	T	Y	T	Y	T	H	T	Y	T	N	T	T	T	T	T	T	Y	Y	Y	Y	Y	T	T	Y	H	Y	T	Y	Y	T	T	T	T	H	H	H	T	T	Y	T	T	Y	T	T
S486_4588	T/C	486	4588	+	NA	Y	T	Y	Y	Y	N	T	T	T	Y	Y	Y	Y	T	T	Y	T	T	T	Y	T	Y	T	T	Y	Y	T	Y	Y	Y	T	T	Y	T	T	T	T	Y	T	N	N	T	T	Y
S491_13080	A/G	491	13080	+	NA	A	A	R	R	A	R	A	A	A	A	R	R	A	R	R	R	R	A	A	A	A	R	A	A	A	R	R	R	A	R	R	R	R	A	A	A	A	A	A	N	A	R	A	A
S492_28531	A/C	492	28531	+	NA	M	M	M	M	A	A	M	A	A	M	M	M	M	M	M	M	M	A	A	M	A	M	A	A	M	M	A	M	M	M	M	M	A	A	A	A	A	M	A	M	M	A	A	M
S496_1650	G/A	496	1650	+	NA	G	R	G	G	G	R	G	G	G	G	R	R	G	G	G	G	R	R	R	G	R	G	G	G	G	G	G	G	G	R	G	R	R	R	G	G	G	R	G	G	G	R	G	G
S497_19474	A/G	497	19474	+	NA	A	A	R	R	A	R	A	A	A	A	R	R	A	R	A	R	R	A	A	R	R	R	A	A	A	R	R	R	A	R	R	H	R	N	A	A	A	R	A	R	A	R	A	A
S501_35904	G/A	501	35904	+	NA	G	R	G	G	G	G	G	G	G	G	R	R	G	G	R	G	R	R	R	G	R	G	G	G	G	R	G	G	G	G	G	H	R	R	G	G	G	R	G	G	N	H	G	G
S502_16008	T/G	502	16008	+	NA	K	K	T	T	T	T	T	T	T	K	K	T	T	K	T	K	T	T	T	K	T	T	K	H	K	T	K	K	T	T	K	K	K	T	K	K	T	K	T	T	H	T	K	H
S503_30613	T/C	503	30613	+	NA	Y	Y	T	T	Y	T	T	T	Y	Y	Y	T	T	Y	T	Y	T	T	T	Y	T	T	Y	Y	Y	T	Y	Y	T	T	Y	Y	Y	T	Y	Y	T	Y	T	T	Y	T	Y	Y
S504_16660	C/T	504	16660	+	NA	Y	Y	C	Y	C	C	C	C	Y	C	Y	Y	C	Y	C	C	C	Y	Y	C	C	C	Y	C	Y	Y	Y	Y	Y	C	C	N	Y	C	C	Y	C	C	C	C	C	C	C	C
S504_67341	T/G	504	67341	+	NA	K	K	T	K	K	T	T	T	K	T	K	K	T	K	T	T	T	K	K	T	T	T	K	T	K	K	K	K	K	T	T	K	K	T	T	K	T	T	T	T	K	T	T	T
S505_5922	G/C	505	5922	+	NA	G	S	G	G	S	G	S	S	S	S	G	G	G	S	G	G	G	G	G	G	G	G	S	G	G	S	G	G	S	S	G	G	G	G	S	S	S	G	S	N	G	G	S	G
S507_4761	G/C	507	4761	+	NA	G	S	S	S	S	S	S	S	G	G	S	G	S	G	S	G	G	G	G	S	S	S	S	G	G	G	G	G	S	G	S	S	G	S	S	G	G	S	S	G	G	G	G	S
S508_5360	A/G	508	5360	+	NA	A	R	A	A	R	R	H	R	R	H	R	A	R	A	R	R	R	H	R	R	R	A	A	R	R	A	R	R	R	A	A	R	A	R	A	A	R	A	A	A	N	R	R	R
S510_30359	C/T	510	30359	+	NA	C	Y	Y	Y	Y	C	Y	C	C	C	Y	Y	Y	C	C	C	C	C	C	C	C	C	Y	C	Y	Y	C	C	Y	C	Y	Y	Y	C	C	C	C	C	C	C	Y	C	Y	C
S511_18150	C/T	511	18150	+	NA	Y	C	Y	Y	Y	C	C	C	C	Y	Y	Y	Y	C	C	Y	C	C	C	Y	C	Y	C	C	Y	H	C	Y	Y	Y	C	N	C	C	C	C	C	Y	C	H	C	H	C	Y
S512_52777	T/A	512	52777	+	NA	W	W	T	T	T	W	T	T	W	W	W	T	T	W	T	W	T	T	T	W	T	T	W	W	T	T	W	T	T	T	W	T	W	T	W	W	T	W	T	T	W	T	W	W
S513_10735	T/C	513	10735	+	NA	T	T	Y	T	T	Y	T	Y	T	Y	Y	Y	Y	Y	Y	Y	Y	T	T	T	Y	Y	T	T	Y	T	T	T	Y	Y	T	T	T	Y	T	T	T	Y	T	Y	T	T	T	T
S513_61080	T/G	513	61080	+	NA	T	T	K	T	T	K	T	K	T	K	K	K	K	K	K	K	K	T	T	T	K	K	T	T	K	T	T	T	K	K	T	T	T	K	T	T	T	K	T	K	T	T	T	T
S514_24164	G/A	514	24164	+	NA	G	G	R	R	G	G	R	G	G	R	R	R	G	R	N	R	R	G	G	R	R	R	G	G	R	R	G	G	R	R	G	N	G	N	G	G	G	H	G	R	N	G	G	G
S516_2350	C/G	516	2350	+	NA	S	C	S	S	C	C	S	C	S	S	S	C	C	C	C	C	C	S	C	C	C	S	C	C	S	C	S	S	C	C	C	S	S	C	C	C	S	S	C	H	C	C	C	C
S517_24259	C/T	517	24259	+	NA	C	Y	C	C	C	C	Y	Y	Y	Y	C	C	C	Y	C	C	C	Y	Y	C	C	C	Y	C	C	C	C	C	Y	Y	C	C	C	C	Y	Y	Y	C	C	N	C	C	Y	C
S520_28569	T/C	520	28569	+	NA	T	Y	T	Y	Y	Y	Y	Y	T	T	Y	T	Y	N	Y	T	T	T	T	Y	Y	Y	Y	T	T	T	T	T	Y	T	Y	Y	T	Y	Y	T	T	Y	Y	T	T	T	T	Y
S523_16616	T/A	523	16616	+	NA	T	T	W	W	T	T	T	W	T	T	T	T	W	T	W	T	T	T	T	W	T	T	W	T	T	W	W	T	W	T	W	T	T	T	W	T	T	W	W	T	T	T	T	W
S524_26059	A/T	524	26059	+	NA	W	W	A	A	W	A	A	A	W	W	W	A	A	W	A	W	A	A	A	W	A	A	W	A	W	A	W	W	W	A	W	H	W	A	W	W	A	W	A	A	H	A	W	W
S525_15693	A/C	525	15693	+	NA	A	M	A	A	A	A	M	M	M	M	A	A	A	M	A	A	A	M	M	A	A	A	M	A	A	A	A	A	M	M	A	A	A	A	M	M	M	A	M	A	A	A	M	A
S528_10469	G/A	528	10469	+	NA	G	R	G	G	R	R	R	G	R	G	G	R	G	R	R	R	R	G	G	G	G	G	R	R	G	G	R	G	G	G	G	G	G	G	R	R	R	R	G	G	G	R	R	G
S529_24151	G/C	529	24151	+	NA	G	S	G	G	S	N	S	G	H	G	S	S	S	G	G	S	S	S	S	G	S	G	G	H	S	G	S	S	S	G	G	N	S	H	G	G	H	G	G	N	G	G	S	S
S532_14487	T/G	532	14487	+	NA	K	K	T	T	T	K	T	T	K	K	K	T	T	K	T	K	T	T	T	K	T	T	K	K	K	T	K	T	T	T	K	T	K	T	K	K	T	K	T	T	H	T	K	K
S534_5205	T/C	534	5205	+	NA	T	Y	T	T	T	T	T	T	Y	Y	T	Y	T	Y	Y	T	Y	Y	Y	T	Y	T	T	Y	T	Y	T	T	T	T	T	T	Y	Y	T	T	Y	Y	T	T	T	Y	T	T
S535_1219	G/A	535	1219	+	NA	G	G	R	G	G	R	G	R	G	G	G	R	R	G	R	G	G	G	G	R	G	G	R	G	G	R	R	G	R	G	R	R	G	G	R	G	G	R	R	R	G	G	G	R
S535_67139	A/T	535	67139	+	NA	A	A	W	A	A	W	A	W	A	A	A	W	W	A	W	A	A	A	A	A	A	A	W	A	A	W	W	A	A	A	W	N	A	A	W	A	A	W	W	N	A	A	A	A
S536_38738	A/G	536	38738	+	NA	R	R	A	A	R	A	A	A	R	R	R	A	A	R	A	R	A	A	A	R	A	A	R	A	R	A	R	R	R	A	R	R	R	A	R	R	A	R	A	A	R	A	R	R
S537_28232	G/T	537	28232	+	NA	K	K	K	K	G	H	K	G	G	K	K	K	K	K	K	K	K	G	G	K	K	K	G	G	K	K	G	G	K	K	G	N	G	G	G	G	G	K	G	H	G	G	G	G
S538_6269	T/C	538	6269	+	NA	T	T	Y	T	T	Y	T	Y	T	Y	T	Y	Y	T	T	T	T	T	T	Y	T	T	H	T	T	T	Y	T	Y	T	Y	H	T	T	H	T	T	T	T	T	T	T	T	Y
S539_351	T/A	539	351	+	NA	T	W	T	T	T	W	W	W	T	W	W	T	W	T	W	W	T	N	T	T	T	T	T	N	W	T	W	W	W	T	T	T	T	T	T	T	T	T	T	T	T	T	T	T
S540_3047	T/G	540	3047	+	NA	T	K	T	T	T	T	K	T	K	K	T	T	T	K	T	T	T	K	T	T	T	T	H	T	T	T	T	T	K	K	T	T	T	N	K	K	K	T	K	N	T	T	K	T
S541_10942	G/A	541	10942	+	NA	G	G	R	R	G	R	R	G	G	R	G	R	G	G	R	R	R	G	G	G	G	R	G	G	G	R	G	R	G	R	R	H	H	G	G	G	G	G	G	N	R	G	G	G
S541_64631	T/A	541	64631	+	NA	T	T	W	W	T	N	W	T	T	W	T	W	T	W	W	W	W	T	T	T	T	W	T	T	T	W	T	W	T	W	W	H	W	T	T	T	T	T	T	H	N	T	T	W
S543_17879	C/T	543	17879	+	NA	Y	Y	Y	Y	C	C	Y	C	C	Y	Y	Y	Y	Y	Y	Y	Y	C	C	Y	Y	Y	C	C	Y	Y	C	C	Y	Y	Y	Y	C	H	C	C	C	Y	C	Y	C	C	C	C
S544_21369	T/A	544	21369	+	NA	W	W	T	T	T	W	W	T	W	W	W	T	T	W	T	W	T	T	T	W	T	T	W	W	W	T	W	T	T	T	W	T	T	T	W	W	T	W	T	T	W	T	W	W
S545_15611	A/G	545	15611	+	NA	R	R	A	R	A	A	R	A	R	R	R	A	A	R	A	A	R	R	R	A	A	R	A	A	R	A	R	R	R	A	A	A	R	A	A	A	R	R	A	N	R	A	A	R
S546_13485	C/T	546	13485	+	NA	C	C	C	Y	Y	Y	C	C	C	Y	Y	Y	C	C	Y	Y	H	C	C	C	Y	C	Y	C	Y	Y	C	Y	C	C	Y	Y	Y	C	Y	C	C	C	C	Y	C	C	C	Y
S551_10179	G/A	551	10179	+	NA	G	G	G	R	R	R	G	G	G	R	R	R	G	G	R	R	R	G	G	G	R	G	R	G	R	R	G	R	G	G	R	H	R	G	R	R	G	G	G	R	G	G	G	R
S552_35848	G/A	552	35848	+	NA	G	R	R	R	R	G	R	G	G	G	R	R	R	G	G	G	G	G	G	G	G	G	R	G	R	R	G	G	R	G	R	G	R	G	G	R	G	G	G	G	N	G	R	G
S554_11567	A/T	554	11567	+	NA	A	W	W	W	A	A	W	W	A	A	W	A	W	A	W	A	A	A	A	W	W	W	W	A	A	A	A	A	W	A	W	W	A	W	W	A	A	A	W	A	A	A	A	W
S555_13471	G/C	555	13471	+	NA	S	S	S	S	G	S	S	G	G	S	S	S	S	S	S	S	S	G	G	S	S	S	G	G	S	S	G	G	S	S	G	S	G	S	G	G	G	S	G	S	G	G	G	G
S558_47007	G/A	558	47007	+	NA	G	R	G	G	R	G	R	R	R	R	R	H	R	G	G	R	R	R	R	G	R	G	G	R	R	G	R	R	R	G	G	R	R	G	G	G	R	G	G	R	G	R	G	R
S560_11208	T/C	560	11208	+	NA	T	Y	T	T	T	T	T	T	Y	Y	T	Y	T	Y	H	T	Y	H	Y	T	Y	T	T	Y	T	Y	T	T	T	T	T	T	Y	Y	T	T	Y	T	T	T	T	H	T	T
S561_8813	A/C	561	8813	+	NA	A	A	M	M	A	H	A	M	A	A	M	M	M	A	M	A	A	A	A	M	A	A	M	A	M	M	M	A	M	A	M	N	A	A	M	A	A	M	M	N	N	A	A	H
S563_9531	A/C	563	9531	+	NA	M	M	A	M	A	A	M	A	M	A	A	A	A	M	A	A	M	M	M	A	A	M	A	A	M	A	M	M	M	A	A	M	M	A	A	A	M	M	A	M	M	A	A	M
S566_50671	A/G	566	50671	+	NA	A	R	A	A	R	R	R	R	R	R	R	A	R	A	R	R	R	R	R	R	R	A	A	R	R	A	R	R	R	A	A	N	A	A	A	A	R	A	A	N	A	R	R	R
S567_14205	T/C	567	14205	+	NA	T	Y	T	Y	Y	T	Y	T	Y	Y	Y	T	T	T	T	Y	Y	T	T	T	T	T	Y	Y	T	T	T	Y	T	T	T	Y	T	T	T	T	Y	T	Y	T	T	T	Y	Y
S570_26956	G/A	570	26956	+	NA	G	G	R	R	G	R	G	R	G	G	R	R	R	G	R	G	G	G	G	G	G	G	R	G	G	R	R	G	G	G	R	G	G	G	R	G	G	G	R	G	G	G	G	G
S572_49726	T/C	572	49726	+	NA	Y	Y	T	Y	T	T	Y	T	Y	T	T	T	T	Y	T	T	Y	Y	Y	T	T	Y	T	T	Y	T	Y	Y	Y	T	T	Y	Y	T	T	T	Y	Y	T	Y	Y	T	T	T
S573_6215	A/T	573	6215	+	NA	A	A	A	A	A	W	W	W	A	A	W	A	W	A	W	W	W	A	A	A	A	A	A	A	W	A	W	W	W	A	A	N	A	A	A	A	A	A	A	N	A	A	A	A
S574_15504	C/T	574	15504	+	NA	C	C	Y	Y	C	Y	C	C	C	C	C	Y	C	Y	Y	Y	Y	C	C	C	C	Y	C	C	C	Y	Y	Y	C	Y	Y	Y	Y	C	C	C	C	C	C	C	C	Y	C	C
S574_80794	T/C	574	80794	+	NA	T	T	Y	Y	T	Y	T	T	T	T	T	Y	T	Y	Y	Y	Y	T	T	T	T	Y	T	T	T	Y	Y	Y	T	Y	Y	Y	Y	T	T	T	T	T	T	Y	T	Y	T	T
S575_37195	G/A	575	37195	+	NA	G	G	R	R	G	R	G	G	G	G	G	R	G	R	R	R	R	G	G	G	G	R	G	G	G	R	G	R	G	R	R	R	R	G	G	G	G	G	G	R	G	G	G	G
S576_15229	G/A	576	15229	+	NA	G	R	G	R	R	G	G	G	R	G	R	R	G	H	G	G	G	G	R	G	G	G	R	G	G	R	R	R	R	G	R	G	R	G	G	R	G	G	G	N	N	G	G	G
S576_69322	T/C	576	69322	+	NA	Y	T	T	Y	Y	T	T	T	Y	T	Y	Y	T	Y	T	T	T	T	Y	T	T	T	T	T	Y	Y	T	Y	Y	T	T	N	T	T	T	Y	T	T	T	T	T	T	T	T
S577_14503	C/G	577	14503	+	NA	C	S	C	C	C	S	C	C	C	C	S	S	C	C	C	C	S	S	S	C	S	C	C	C	C	C	C	C	C	S	C	H	S	S	C	C	C	S	C	C	C	H	C	C
S578_5981	G/C	578	5981	+	NA	G	S	G	G	G	G	S	S	S	S	G	G	G	S	G	G	G	G	S	G	G	G	S	G	G	G	G	G	S	S	G	G	G	G	S	S	S	G	S	S	G	S	S	G
S578_57340	C/A	578	57340	+	NA	C	M	C	C	C	C	M	M	M	M	C	C	C	M	C	C	C	M	M	C	C	C	M	C	C	C	C	C	M	M	C	C	C	C	M	M	M	C	M	N	C	M	M	C
S579_23454	T/A	579	23454	+	NA	W	T	W	T	W	T	T	T	W	T	T	N	W	W	T	T	T	T	T	T	W	W	H	T	W	T	T	T	W	W	T	W	T	H	T	T	T	W	W	N	T	N	W	T
S580_6054	T/C	580	6054	+	NA	Y	Y	Y	Y	T	T	Y	T	T	Y	Y	Y	Y	Y	N	Y	T	T	T	Y	T	Y	T	T	Y	Y	T	Y	Y	Y	Y	H	T	T	T	T	T	Y	T	N	N	T	T	Y
S582_3148	T/C	582	3148	+	NA	T	T	T	Y	Y	Y	T	T	T	Y	Y	Y	T	T	T	Y	Y	T	T	T	Y	T	Y	T	Y	Y	T	Y	T	T	Y	T	T	T	Y	Y	T	T	T	Y	T	Y	T	H
S583_14312	A/G	583	14312	+	NA	R	R	R	R	A	A	R	A	R	R	R	A	A	R	A	A	A	R	R	A	A	R	A	A	R	A	R	R	A	A	A	R	R	A	A	A	R	R	A	N	N	A	R	R
S584_36914	T/G	584	36914	+	NA	T	K	T	T	T	T	K	K	K	K	T	T	T	K	T	T	T	K	K	T	T	T	K	T	T	T	T	T	K	K	T	T	T	T	K	K	K	T	K	H	T	T	K	T
S585_4906	A/C	585	4906	+	NA	A	M	A	M	M	M	M	M	A	A	M	A	A	A	A	M	M	M	M	M	M	A	A	M	M	A	M	M	M	A	A	A	A	M	A	A	A	A	A	A	A	M	M	M
S585_56311	A/G	585	56311	+	NA	A	R	A	R	R	R	R	R	A	A	R	A	A	A	N	R	R	R	R	R	R	A	A	R	R	A	R	R	R	A	A	R	A	R	A	A	A	A	A	R	A	R	R	R
S586_19027	C/T	586	19027	+	NA	C	Y	C	Y	Y	C	Y	C	C	C	Y	Y	Y	C	C	C	C	C	C	C	C	C	Y	C	Y	Y	C	C	Y	C	Y	H	Y	C	C	C	C	C	C	C	Y	C	Y	C
S587_24710	T/A	587	24710	+	NA	T	W	T	T	W	W	W	W	W	W	W	W	W	T	T	W	W	W	W	T	W	T	T	W	W	T	W	W	W	T	T	W	W	T	T	T	W	T	T	H	T	W	T	W
S590_1961	T/A	590	1961	+	NA	T	T	H	W	T	W	W	T	T	T	W	W	W	W	T	W	W	T	T	W	W	W	T	T	W	N	T	T	W	W	T	T	T	T	T	T	T	W	T	N	T	T	T	T
S591_7568	G/A	591	7568	+	NA	G	R	G	G	R	H	R	R	R	R	R	R	R	G	G	R	R	R	R	G	R	G	R	R	R	G	R	R	R	G	G	R	R	G	R	H	R	G	R	R	G	R	G	R
S592_6069	G/T	592	6069	+	NA	G	G	G	K	K	K	G	G	G	G	G	G	K	K	G	G	G	G	G	G	G	K	K	K	K	G	G	G	K	G	G	H	G	N	K	K	G	K	K	G	N	G	K	G
S593_49955	T/A	593	49955	+	NA	W	T	W	T	W	H	W	T	W	T	T	N	W	W	T	T	T	T	T	T	W	W	W	W	T	T	T	T	W	W	T	N	T	T	T	T	T	W	T	H	N	T	W	T
S596_7371	T/C	596	7371	+	NA	Y	Y	Y	Y	T	T	Y	T	T	Y	Y	Y	Y	Y	T	Y	T	T	T	Y	T	Y	T	T	Y	Y	T	Y	Y	Y	Y	Y	T	T	T	T	T	Y	T	Y	Y	T	T	Y
S599_18827	G/C	599	18827	+	NA	G	S	G	G	G	G	S	G	S	S	S	G	G	G	G	S	S	G	G	G	G	G	S	S	G	G	G	S	G	G	G	G	G	G	G	G	S	G	S	G	G	G	S	G
S600_1522	T/C	600	1522	+	NA	T	T	T	Y	Y	Y	T	T	T	T	Y	Y	T	T	T	Y	Y	T	T	T	Y	T	Y	T	Y	Y	T	Y	T	T	Y	T	T	T	Y	Y	T	Y	T	Y	T	Y	T	Y
S600_59462	A/G	600	59462	+	NA	A	A	A	R	R	R	A	A	A	A	R	H	A	A	A	R	A	A	A	A	R	A	R	A	R	R	A	R	A	A	R	A	A	A	R	R	A	R	A	N	A	R	A	R
S601_16985	G/A	601	16985	+	NA	G	G	G	R	R	R	R	G	R	R	R	R	G	G	R	G	R	G	G	G	R	G	R	R	R	G	G	R	G	G	R	R	H	G	R	R	G	G	G	G	G	G	G	R
S602_22295	A/G	602	22295	+	NA	R	R	A	R	R	A	A	A	R	A	R	R	A	R	A	A	A	R	R	A	A	A	R	A	R	R	R	R	R	A	R	R	R	A	A	R	A	A	A	A	A	A	R	A
S603_6615	G/T	603	6615	+	NA	K	K	K	K	G	G	K	G	G	K	K	K	K	K	G	K	G	G	G	K	G	H	G	G	K	K	G	K	K	K	G	N	G	G	G	G	N	K	G	K	G	G	G	K
S605_10629	A/C	605	10629	+	NA	A	M	A	A	A	A	M	M	M	M	A	A	A	M	A	A	A	M	M	A	A	A	M	A	A	A	A	A	M	A	A	A	A	A	M	M	M	A	M	M	A	M	M	A
S606_9261	A/T	606	9261	+	NA	A	W	A	A	A	A	W	W	W	W	W	A	W	A	W	W	H	W	W	W	W	A	A	W	W	A	W	W	W	A	A	A	W	N	A	A	W	A	A	A	H	W	W	W
S608_6204	A/G	608	6204	+	NA	A	R	A	A	R	A	R	A	R	R	R	A	A	A	A	R	R	A	A	A	A	A	R	R	A	A	A	R	A	A	A	R	A	A	A	A	R	A	R	A	A	A	R	A
S609_11017	A/C	609	11017	+	NA	M	M	A	A	M	A	A	A	M	M	M	A	A	M	A	M	A	A	A	M	A	A	M	M	M	A	M	M	A	A	M	M	M	A	M	M	A	M	A	A	H	A	M	M
S609_62146	C/G	609	62146	+	NA	S	S	C	C	S	C	C	C	S	S	S	C	C	S	N	S	N	N	C	S	C	C	S	S	S	C	S	S	C	C	S	H	S	C	S	H	C	S	C	C	H	C	H	S
S610_2908	C/T	610	2908	+	NA	Y	Y	C	Y	C	C	Y	C	Y	C	C	C	C	Y	C	C	Y	Y	Y	C	C	Y	C	C	Y	C	Y	Y	Y	C	C	Y	Y	C	C	C	Y	Y	C	Y	Y	C	C	Y
S611_7908	G/C	611	7908	+	NA	G	G	G	S	S	S	G	G	G	S	S	S	G	G	S	G	S	G	G	G	S	G	S	G	G	S	G	S	G	G	S	S	S	G	S	S	G	G	G	S	G	G	G	S
S611_58984	G/C	611	58984	+	NA	G	G	G	S	S	H	G	G	G	G	S	H	G	G	H	G	S	G	G	G	S	G	S	G	S	S	G	S	G	G	S	N	S	G	S	S	G	G	G	H	G	G	G	G
S612_32387	A/T	612	32387	+	NA	A	W	W	A	A	A	W	H	W	W	A	A	A	W	A	A	A	W	W	A	A	A	W	A	A	A	A	A	W	W	A	A	A	A	W	W	H	A	H	W	A	A	W	A
S613_9533	T/C	613	9533	+	NA	T	T	T	Y	Y	T	T	T	Y	Y	Y	T	T	T	T	Y	Y	T	T	T	T	T	Y	Y	T	T	T	Y	T	T	T	Y	T	T	T	T	Y	T	T	T	T	T	Y	Y
S614_11629	A/G	614	11629	+	NA	R	A	R	A	R	A	A	R	R	R	A	R	R	R	A	A	A	A	A	A	R	R	R	A	R	A	A	A	R	R	A	R	A	R	A	A	A	R	A	R	R	A	R	A
S615_55882	G/A	615	55882	+	NA	R	R	R	R	G	R	R	G	R	R	R	R	G	G	G	G	R	R	R	G	G	R	G	G	R	R	R	R	G	G	G	R	G	G	G	G	R	R	G	R	G	G	R	R
S616_10961	C/A	616	10961	+	NA	M	M	C	M	C	C	M	C	M	C	C	C	C	M	C	C	M	M	M	C	C	M	C	C	M	C	M	M	M	C	C	M	M	C	C	C	M	M	C	M	M	C	C	C
S617_42832	T/A	617	42832	+	NA	H	H	T	W	W	H	T	T	W	T	W	H	T	W	T	T	T	W	W	T	T	T	H	T	W	W	W	W	H	T	T	H	W	T	T	W	N	T	T	N	T	T	T	T
S618_5376	T/A	618	5376	+	NA	T	W	T	W	T	T	W	T	T	T	W	W	W	T	T	T	T	T	T	T	T	T	W	T	W	W	T	T	T	T	W	W	W	T	T	T	T	T	T	T	W	T	T	T
S619_21281	A/C	619	21281	+	NA	M	M	M	M	A	A	M	A	M	M	M	A	A	A	A	A	A	M	M	A	A	M	A	A	M	A	M	M	A	A	A	A	M	A	A	A	M	M	A	A	A	A	M	M
S620_26813	T/C	620	26813	+	NA	T	Y	T	T	T	T	Y	T	Y	Y	T	Y	T	Y	Y	T	Y	Y	Y	T	T	T	T	Y	T	Y	T	T	T	T	T	T	T	T	T	T	Y	Y	T	T	T	Y	T	T
S621_7034	A/G	621	7034	+	NA	R	R	A	A	A	A	A	A	R	R	R	A	A	R	A	R	A	A	A	R	A	A	R	R	R	A	R	R	A	A	R	H	R	A	R	R	A	R	A	A	H	A	R	A
S622_17958	C/T	622	17958	+	NA	C	Y	Y	C	C	C	Y	C	Y	Y	C	C	C	Y	Y	C	Y	Y	Y	C	C	C	C	Y	C	Y	C	C	C	C	C	C	C	C	C	C	Y	Y	C	C	C	Y	C	C
S626_6930	T/A	626	6930	+	NA	W	H	W	W	T	W	W	T	W	T	W	W	T	T	T	T	W	H	W	T	T	W	T	T	H	W	W	W	T	T	T	H	T	T	T	T	W	W	T	W	N	T	W	W
S628_8319	G/A	628	8319	+	NA	G	G	R	G	R	H	G	H	G	R	G	G	R	R	R	R	R	G	G	G	R	R	G	G	R	G	G	G	R	R	G	G	G	R	G	G	G	R	G	G	G	G	G	G
S628_63678	T/C	628	63678	+	NA	T	T	Y	T	Y	Y	T	Y	T	Y	T	Y	Y	Y	Y	Y	Y	T	T	T	Y	Y	T	T	Y	Y	T	T	Y	Y	T	T	T	Y	T	T	T	Y	T	H	T	T	T	T
S629_7216	C/T	629	7216	+	NA	C	C	Y	C	C	Y	C	Y	C	C	C	Y	Y	C	C	C	C	C	C	Y	C	C	Y	C	C	C	Y	C	Y	C	Y	N	Y	C	Y	C	C	Y	C	C	C	C	C	Y
S631_1111	C/T	631	1111	+	NA	C	Y	C	C	C	Y	C	C	C	C	Y	Y	C	C	C	C	C	Y	Y	C	Y	C	C	C	C	C	C	C	C	Y	C	Y	Y	Y	C	C	C	Y	C	C	C	Y	C	C
S632_8399	G/A	632	8399	+	NA	G	G	R	R	R	R	R	R	G	G	R	G	R	G	R	G	G	G	G	R	R	G	R	G	G	G	G	G	R	G	R	R	G	R	R	G	G	R	R	G	G	G	G	R
S633_42475	G/A	633	42475	+	NA	G	G	R	R	G	R	G	G	G	G	R	R	G	R	G	R	R	G	G	R	R	R	G	G	G	R	R	R	G	R	R	G	G	G	G	G	G	R	G	N	G	R	G	G
S635_16421	A/G	635	16421	+	NA	A	R	A	A	A	A	R	R	R	R	A	A	A	R	A	A	A	R	R	A	A	A	R	A	A	A	A	A	R	R	A	A	A	A	R	R	R	A	R	R	A	A	R	A
S637_12092	A/T	637	12092	+	NA	A	A	A	W	W	W	A	A	A	W	W	W	A	A	A	W	W	A	A	A	W	A	W	A	W	W	A	W	A	A	W	W	W	A	W	W	A	A	A	W	A	A	A	W
S643_4665	C/G	643	4665	+	NA	C	S	S	S	S	S	S	S	C	C	S	C	S	C	H	C	C	C	C	S	S	S	S	C	C	C	C	C	S	C	S	S	C	S	S	C	C	S	C	C	C	C	C	S
S645_23025	T/A	645	23025	+	NA	T	W	T	T	T	H	W	T	W	W	T	T	W	W	W	T	W	W	W	T	T	T	W	W	T	W	W	T	T	T	T	T	T	T	W	W	W	W	T	T	T	W	W	T
S647_11616	T/C	647	11616	+	NA	T	Y	T	Y	T	Y	Y	Y	T	T	T	T	T	T	Y	Y	Y	Y	Y	Y	Y	T	T	Y	Y	T	T	Y	Y	T	T	T	T	Y	T	T	T	T	T	Y	T	Y	Y	T
S647_64498	A/T	647	64498	+	NA	A	H	A	W	A	W	W	A	A	A	A	A	A	A	H	W	W	W	W	W	W	A	A	W	W	A	A	W	W	A	A	A	A	W	A	A	A	A	A	W	A	W	W	A
S648_9396	G/A	648	9396	+	NA	R	G	R	R	R	G	G	G	G	R	R	R	R	G	G	R	G	G	G	R	G	R	G	G	R	R	G	R	R	R	G	R	R	G	G	G	G	R	G	R	R	R	G	R
S649_12415	A/G	649	12415	+	NA	A	R	A	A	A	A	A	A	R	R	A	R	A	R	R	A	R	R	R	A	R	A	A	R	A	R	A	A	A	A	A	A	R	R	A	A	R	R	A	A	A	R	A	A
S651_3592	C/A	651	3592	+	NA	M	H	C	M	C	C	M	C	H	M	M	C	C	M	C	C	C	M	M	C	C	C	C	C	M	C	M	M	C	C	C	N	M	C	C	C	M	M	C	N	N	C	M	M
S652_11451	A/C	652	11451	+	NA	M	M	M	M	A	M	M	A	A	M	A	M	A	M	M	M	H	A	A	A	A	H	A	A	A	A	A	M	A	N	A	N	M	A	A	A	A	A	A	N	H	A	A	H
S653_10290	T/C	653	10290	+	NA	Y	Y	Y	Y	Y	T	Y	N	H	H	Y	Y	T	T	T	T	Y	T	Y	T	T	Y	T	T	T	Y	Y	Y	T	T	Y	Y	T	T	T	T	Y	T	T	T	T	T	Y	Y
S655_2307	A/T	655	2307	+	NA	A	W	A	A	W	W	W	W	W	W	W	W	W	A	A	W	W	W	W	A	W	A	A	A	W	A	W	W	W	A	A	W	W	A	A	A	H	A	A	N	A	A	A	W
S655_59655	T/G	655	59655	+	NA	T	K	T	T	K	T	K	K	K	H	K	K	K	T	T	K	K	K	K	T	K	T	T	K	K	T	K	K	K	T	T	T	K	T	T	T	H	T	T	H	T	K	T	K
S664_27558	G/T	664	27558	+	NA	G	K	G	G	H	H	H	K	K	K	K	G	K	G	G	K	K	K	H	G	K	G	G	K	K	G	K	K	K	G	G	H	K	G	G	G	K	G	G	H	G	K	G	K
S665_42109	T/C	665	42109	+	NA	T	Y	T	T	T	T	T	T	T	T	Y	Y	T	T	Y	T	Y	Y	Y	T	Y	T	T	T	T	Y	T	T	T	T	T	Y	Y	Y	T	T	T	Y	T	T	T	Y	T	T
S668_40566	A/C	668	40566	+	NA	A	A	A	M	M	M	A	A	M	M	M	M	A	A	M	A	M	A	A	A	M	A	M	A	M	M	A	M	A	A	M	M	M	A	M	M	A	A	A	M	A	A	A	M
S669_16834	T/A	669	16834	+	NA	W	T	W	T	W	T	T	W	W	W	T	W	W	W	T	T	T	T	T	T	W	W	W	T	W	T	T	T	W	W	T	W	W	W	T	T	T	W	T	W	W	T	W	W
S671_9476	G/T	671	9476	+	NA	G	G	G	K	K	K	K	G	K	K	K	K	G	G	K	G	K	G	G	G	K	G	K	K	K	G	G	K	G	G	K	K	K	G	K	K	G	G	G	G	G	G	G	K
S672_20488	C/T	672	20488	+	NA	Y	Y	C	Y	C	C	Y	C	Y	Y	Y	C	C	Y	C	C	Y	Y	Y	C	C	Y	C	C	Y	C	Y	Y	Y	C	C	Y	Y	C	C	C	Y	Y	C	H	Y	C	C	Y
S674_27352	G/C	674	27352	+	NA	S	G	G	G	S	G	G	G	S	H	S	S	G	G	G	S	G	G	G	S	S	G	S	G	S	S	S	S	S	S	S	S	S	G	S	S	G	S	G	N	G	G	S	S
S675_3463	C/T	675	3463	+	NA	Y	C	Y	C	Y	C	C	Y	Y	Y	C	Y	Y	Y	C	C	C	C	C	C	Y	Y	C	C	Y	C	C	C	Y	C	C	C	C	Y	C	C	C	Y	Y	Y	N	C	Y	C
S677_12705	T/A	677	12705	+	NA	T	T	T	W	W	H	W	T	W	W	W	W	T	T	W	T	W	T	T	T	W	T	W	W	W	T	T	W	T	T	W	W	W	T	W	W	T	T	T	W	T	T	T	W
S678_20986	T/C	678	20986	+	NA	Y	Y	Y	Y	T	T	Y	T	T	Y	Y	Y	Y	Y	T	Y	T	T	T	Y	T	Y	T	T	Y	Y	T	Y	Y	Y	Y	N	T	T	T	T	T	Y	T	Y	T	T	T	H
S679_14022	T/C	679	14022	+	NA	Y	T	T	T	Y	T	Y	T	Y	Y	Y	Y	T	T	T	Y	T	T	T	T	Y	T	T	T	Y	Y	Y	Y	Y	Y	Y	Y	Y	T	T	T	T	Y	T	Y	T	T	T	Y
S680_4295	C/T	680	4295	+	NA	C	C	Y	Y	C	Y	C	C	C	C	Y	Y	C	Y	C	Y	Y	C	C	C	Y	Y	C	C	C	Y	Y	Y	C	Y	Y	Y	Y	C	C	C	C	Y	C	C	C	Y	C	C
S682_7006	A/T	682	7006	+	NA	A	W	A	A	W	A	W	W	W	W	A	A	A	W	A	A	A	N	A	A	A	A	W	A	A	W	A	A	A	W	A	N	A	A	W	W	W	A	W	H	N	A	W	A
S683_7635	G/A	683	7635	+	NA	G	G	G	R	R	H	R	G	R	R	R	R	G	G	N	G	R	G	G	G	R	G	R	R	R	G	G	R	G	G	G	R	R	G	R	R	G	G	G	R	G	G	G	R
S685_48541	G/A	685	48541	+	NA	G	R	G	G	G	G	H	R	R	R	R	G	G	R	G	R	R	G	G	R	G	G	R	R	H	G	R	G	G	G	G	G	G	G	R	R	G	R	G	N	N	R	R	R
S686_20761	T/C	686	20761	+	NA	T	T	Y	Y	T	Y	Y	T	T	T	T	Y	T	Y	Y	Y	Y	T	T	T	T	Y	T	T	N	Y	T	Y	T	Y	Y	Y	Y	T	T	T	T	T	T	H	T	T	T	T
S688_16325	T/C	688	16325	+	NA	T	T	T	Y	T	Y	Y	T	Y	Y	Y	T	T	T	Y	T	H	T	T	T	Y	T	Y	Y	T	T	T	Y	T	T	Y	Y	T	T	T	Y	T	T	T	N	T	T	T	Y
S690_21883	T/C	690	21883	+	NA	T	T	T	Y	Y	Y	Y	T	Y	Y	Y	T	T	T	Y	T	Y	T	T	T	Y	T	Y	Y	T	T	T	Y	T	T	T	Y	Y	T	T	Y	T	T	T	Y	T	T	T	Y
S691_14120	T/G	691	14120	+	NA	K	K	T	T	K	K	T	K	K	T	T	T	K	K	T	K	K	T	K	K	T	T	T	T	K	K	T	T	K	T	K	T	K	T	T	K	T	T	K	K	T	K	T	K
S698_1365	T/C	698	1365	+	NA	T	Y	T	T	T	T	Y	Y	Y	Y	T	T	T	Y	T	T	T	Y	Y	T	T	T	Y	T	T	T	T	T	Y	Y	T	T	T	T	Y	Y	Y	T	Y	Y	T	T	Y	T
S699_11404	A/C	699	11404	+	NA	M	M	M	M	A	A	M	A	M	A	M	A	A	M	N	A	A	A	M	A	A	M	A	A	M	A	M	M	A	A	A	M	M	A	A	A	H	M	A	A	A	A	M	M
S700_1372	A/G	700	1372	+	NA	R	A	R	A	R	R	H	R	R	A	A	A	R	H	A	A	A	A	A	A	R	R	R	R	R	A	A	A	R	R	A	N	A	R	A	A	A	R	R	H	H	A	R	A
S700_54996	C/A	700	54996	+	NA	M	C	M	C	M	M	M	M	M	C	C	C	M	M	C	C	C	C	C	C	M	M	M	M	M	C	C	C	M	M	C	M	C	M	C	C	C	M	M	H	M	C	M	C
S701_337	C/A	701	337	+	NA	C	M	C	M	C	M	M	M	C	C	C	C	C	C	M	M	C	C	M	M	M	C	C	M	C	C	C	M	M	C	C	C	C	M	C	C	C	C	C	N	C	M	M	C
S703_40199	G/A	703	40199	+	NA	G	G	R	R	G	R	R	G	G	R	G	R	G	G	R	R	R	G	G	G	G	R	G	G	G	R	G	R	G	R	R	R	R	G	G	G	G	G	N	G	H	G	G	R
S706_24809	G/A	706	24809	+	NA	R	R	G	R	R	R	G	G	R	G	R	G	G	G	G	G	G	G	R	G	G	G	R	G	G	R	R	R	R	G	G	N	R	G	G	R	G	G	G	N	H	G	G	G
S707_5758	C/A	707	5758	+	NA	C	C	M	M	C	M	C	C	C	C	M	M	C	M	C	M	M	C	C	M	M	M	C	C	C	M	M	M	C	M	M	M	M	C	C	C	C	M	C	C	C	M	C	C
S709_10830	G/A	709	10830	+	NA	G	G	G	R	R	R	R	G	R	R	R	H	G	G	R	G	R	G	G	G	R	G	R	R	R	G	G	R	G	G	R	H	R	G	R	R	G	G	G	R	G	G	G	R
S711_17925	T/C	711	17925	+	NA	T	Y	T	T	T	T	Y	T	Y	Y	T	Y	T	Y	Y	T	Y	Y	Y	T	T	T	T	Y	T	Y	T	T	T	T	T	N	T	T	T	T	Y	Y	T	N	T	Y	T	T
S712_12933	G/A	712	12933	+	NA	R	G	G	G	G	G	R	G	R	R	R	R	G	G	G	R	G	G	G	G	R	G	G	G	G	R	R	R	R	R	R	R	R	G	G	G	G	R	G	G	G	G	G	R
S712_66988	T/C	712	66988	+	NA	T	Y	T	T	Y	Y	Y	Y	Y	Y	Y	Y	Y	T	T	Y	Y	Y	Y	T	Y	T	T	Y	Y	T	Y	Y	Y	T	T	Y	Y	T	T	T	Y	T	T	Y	T	Y	T	Y
S715_46190	A/G	715	46190	+	NA	R	R	A	R	A	A	R	A	R	A	A	R	A	R	A	A	R	R	R	A	A	R	A	A	R	A	R	R	R	A	A	H	R	A	A	A	R	R	A	A	R	A	A	A
S716_22775	C/G	716	22775	+	NA	S	C	S	S	C	C	S	C	C	S	S	S	S	S	C	S	C	C	C	S	C	S	C	C	C	S	C	S	S	S	C	C	C	C	C	C	C	S	C	C	S	H	C	S
S717_40716	C/T	717	40716	+	NA	C	Y	C	C	C	C	Y	C	Y	Y	Y	C	C	C	C	Y	Y	C	C	C	C	C	Y	Y	C	C	C	Y	C	C	C	C	C	C	C	C	Y	C	Y	C	C	C	Y	C
S718_4764	G/A	718	4764	+	NA	G	G	G	R	R	R	G	G	R	R	R	G	G	G	H	G	R	N	G	G	R	G	R	R	G	G	G	R	G	G	G	H	R	G	G	R	G	G	G	N	G	G	R	R
S719_11842	G/A	719	11842	+	NA	G	G	R	G	G	R	G	R	G	G	G	R	R	G	G	G	G	G	G	R	G	G	R	G	G	R	R	G	R	G	R	H	R	G	R	R	G	R	G	G	G	G	G	R
S720_34784	A/G	720	34784	+	NA	A	A	R	R	A	R	R	A	A	R	A	R	A	R	R	R	R	A	A	A	A	R	A	A	A	R	A	R	A	R	R	R	R	A	A	A	A	A	A	R	R	A	A	A
S721_10009	A/T	721	10009	+	NA	W	W	A	A	H	A	W	A	W	W	W	W	A	A	A	W	A	A	A	W	W	A	W	A	W	W	W	W	W	W	W	W	W	A	W	W	A	W	A	W	A	A	A	W
S724_41797	C/T	724	41797	+	NA	Y	Y	C	Y	C	C	Y	C	Y	Y	Y	C	C	Y	C	C	Y	Y	Y	C	C	Y	C	C	Y	C	Y	Y	Y	C	C	Y	Y	C	C	C	Y	Y	C	Y	Y	C	C	Y
S725_51713	G/A	725	51713	+	NA	G	R	G	G	R	R	R	R	R	R	R	G	R	G	R	R	R	R	R	G	R	G	G	R	R	G	R	R	R	G	G	R	R	R	G	G	R	G	G	R	G	R	R	R
S729_11975	T/A	729	11975	+	NA	T	W	T	T	T	T	W	T	W	W	T	W	W	W	W	T	W	W	W	T	T	T	W	W	T	W	T	T	T	T	T	T	T	T	W	W	W	W	T	T	T	W	W	T
S730_7661	C/T	730	7661	+	NA	Y	C	Y	C	Y	H	Y	C	Y	C	C	C	Y	Y	Y	C	C	C	C	C	C	Y	Y	Y	C	C	C	C	Y	C	C	H	C	C	C	C	C	Y	Y	H	C	Y	Y	C
S732_6044	G/T	732	6044	+	NA	G	K	G	G	G	G	G	G	G	G	K	K	G	G	K	G	K	K	K	G	K	G	G	G	G	G	G	G	G	G	G	K	G	K	G	G	G	K	G	G	G	K	G	G
S733_25268	T/C	733	25268	+	NA	T	Y	T	Y	Y	T	Y	T	T	T	Y	Y	Y	T	T	T	T	T	T	T	T	T	Y	T	H	Y	T	T	Y	T	Y	Y	Y	T	T	T	T	T	T	T	H	T	Y	T
S735_11779	A/G	735	11779	+	NA	A	R	A	R	A	R	R	R	A	A	A	A	A	A	R	R	R	R	R	R	R	A	A	R	R	A	A	R	R	A	A	A	A	R	A	A	A	A	A	R	A	R	R	A
S736_7972	A/C	736	7972	+	NA	M	M	A	M	A	N	M	A	M	M	A	A	A	A	A	A	A	A	M	A	A	M	M	A	H	A	M	M	A	A	A	M	M	A	A	A	M	A	A	H	A	A	M	M
S737_53452	T/C	737	53452	+	NA	Y	Y	T	Y	Y	T	T	T	Y	T	Y	Y	T	T	T	T	T	Y	Y	T	T	T	Y	T	Y	Y	Y	Y	Y	T	T	N	Y	N	T	Y	T	T	T	N	Y	T	Y	T
S738_25589	C/A	738	25589	+	NA	C	C	C	M	M	M	M	C	M	M	M	C	C	C	M	M	M	C	C	C	C	C	M	M	C	C	C	M	C	C	C	M	M	C	C	M	M	C	C	C	C	C	M	M
S739_33623	C/T	739	33623	+	NA	C	C	Y	C	Y	Y	C	Y	C	Y	C	Y	Y	Y	Y	Y	Y	C	C	C	Y	Y	C	C	Y	C	C	C	Y	Y	C	C	C	Y	C	C	C	Y	C	Y	C	C	C	C
S742_14043	T/C	742	14043	+	NA	T	T	T	Y	Y	Y	T	T	Y	Y	Y	T	T	T	Y	T	Y	T	T	T	Y	T	Y	Y	T	T	T	Y	T	T	T	T	Y	T	T	Y	T	T	T	T	N	T	T	T
S743_2197	G/A	743	2197	+	NA	G	G	R	R	G	R	R	G	G	R	G	R	G	R	R	R	R	G	G	G	G	R	G	G	G	R	G	R	G	R	R	R	R	G	G	G	G	G	G	H	N	G	G	R
S746_3654	T/A	746	3654	+	NA	W	T	T	T	W	T	W	W	W	T	T	T	W	W	T	T	T	T	T	T	W	T	W	T	T	T	T	T	W	W	T	W	T	T	T	T	N	W	W	N	W	T	W	T
S749_13964	G/A	749	13964	+	NA	G	G	R	R	G	R	G	G	G	G	R	R	G	R	G	R	R	G	G	R	R	R	G	G	G	R	R	R	G	R	R	R	G	G	G	G	G	R	G	G	G	R	G	G
S750_31525	G/A	750	31525	+	NA	G	R	G	G	R	G	R	G	R	H	R	G	R	G	H	R	R	H	R	G	R	G	G	R	H	G	R	R	R	G	G	R	R	H	G	G	R	G	G	N	N	R	R	R
S752_4895	G/A	752	4895	+	NA	G	R	G	G	G	G	G	G	G	R	R	R	G	G	R	G	R	R	R	G	R	G	G	G	G	R	G	G	G	G	G	R	R	R	G	G	G	R	G	G	G	R	G	G
S756_3284	G/T	756	3284	+	NA	G	G	K	K	G	K	G	G	G	G	G	K	G	K	K	K	K	G	G	G	G	K	G	G	G	K	G	K	G	K	K	K	K	G	G	G	G	G	G	K	G	G	G	G
S758_24310	A/C	758	24310	+	NA	A	M	A	A	A	A	A	A	A	M	M	M	A	A	M	A	M	M	M	A	M	A	A	A	A	A	A	A	A	A	A	A	M	H	A	A	A	M	A	A	A	M	A	A
S760_12891	G/T	760	12891	+	NA	G	G	G	K	K	H	K	G	K	K	K	G	G	G	K	G	K	G	G	G	K	G	K	K	G	G	G	K	G	G	G	K	K	G	G	K	G	G	G	N	G	G	G	K
S761_11224	C/T	761	11224	+	NA	Y	Y	H	Y	C	C	Y	C	C	Y	Y	Y	Y	Y	Y	Y	Y	C	C	Y	C	Y	C	C	Y	Y	C	C	Y	H	Y	C	C	C	C	C	C	Y	C	H	C	C	C	C
S768_3207	T/C	768	3207	+	NA	T	T	Y	T	T	H	T	Y	T	Y	T	Y	Y	T	T	T	T	T	T	Y	T	T	Y	T	T	T	Y	T	Y	T	Y	N	Y	T	H	T	T	Y	T	T	T	T	T	Y
S769_868	T/C	769	868	+	NA	Y	Y	T	Y	Y	H	T	T	Y	T	Y	T	T	Y	T	T	T	Y	Y	T	T	T	Y	T	Y	Y	Y	T	Y	T	T	T	Y	T	Y	Y	T	T	T	T	N	Y	T	T
S770_10139	C/T	770	10139	+	NA	Y	C	Y	Y	Y	Y	C	C	Y	C	C	C	Y	C	Y	C	C	C	C	C	C	Y	Y	Y	Y	C	C	C	C	C	C	Y	C	C	Y	Y	C	Y	Y	N	C	Y	Y	C
S770_77367	G/A	770	77367	+	NA	R	G	R	G	R	R	G	G	R	G	G	G	R	R	R	G	G	G	G	G	G	R	R	R	R	G	G	G	H	G	G	H	G	G	R	R	G	R	R	R	N	H	R	G
S771_10604	A/T	771	10604	+	NA	A	W	A	A	W	W	W	W	A	A	W	A	W	A	W	W	W	W	W	A	H	A	A	A	W	A	W	W	A	A	A	N	A	A	A	A	A	A	A	W	A	W	W	W
S772_1496	T/G	772	1496	+	NA	K	K	T	T	T	K	T	T	T	H	K	T	T	K	N	K	T	T	T	K	T	T	K	K	K	T	K	T	T	T	K	N	T	N	K	K	T	K	T	N	K	N	K	K
S773_1272	T/C	773	1272	+	NA	T	T	T	Y	Y	Y	T	T	T	Y	Y	Y	T	T	Y	Y	Y	T	T	T	Y	T	Y	T	Y	Y	T	Y	T	T	Y	Y	Y	T	Y	Y	T	T	T	Y	T	T	T	Y
S776_28341	G/A	776	28341	+	NA	G	G	G	R	R	N	G	G	G	R	R	R	G	G	R	G	G	N	G	G	R	G	R	G	R	G	G	R	G	G	R	G	R	N	R	R	G	G	G	R	G	G	G	H
S777_20979	G/T	777	20979	+	NA	G	K	K	K	K	N	K	N	G	G	K	G	K	G	G	G	G	G	G	G	K	K	K	G	K	G	G	G	K	G	K	G	G	K	K	G	G	K	K	G	G	G	G	K
S778_3529	G/A	778	3529	+	NA	G	R	G	G	G	G	R	R	R	R	R	G	G	R	G	R	R	G	G	R	G	G	R	R	R	G	R	G	G	G	R	G	G	G	R	R	G	R	G	G	R	R	R	R
S779_2539	C/T	779	2539	+	NA	C	C	C	Y	Y	Y	C	C	C	Y	Y	Y	C	C	C	Y	Y	C	C	C	Y	C	Y	C	H	Y	C	Y	C	C	Y	C	C	C	Y	Y	C	C	C	N	C	C	C	Y
S779_55417	T/C	779	55417	+	NA	T	T	T	Y	H	H	T	T	T	Y	Y	Y	T	T	T	Y	Y	T	T	T	Y	T	H	T	Y	Y	T	H	T	T	Y	T	T	T	Y	Y	T	T	T	N	N	Y	T	Y
S780_11985	C/T	780	11985	+	NA	Y	Y	Y	Y	C	Y	Y	C	Y	Y	Y	Y	C	C	C	C	C	Y	Y	C	C	Y	C	C	Y	C	Y	Y	C	C	C	C	Y	C	C	C	Y	Y	C	N	C	C	Y	Y
S781_13464	C/T	781	13464	+	NA	C	C	Y	Y	C	H	C	Y	C	C	Y	Y	Y	C	Y	C	C	C	C	Y	Y	C	Y	C	C	Y	Y	C	Y	C	Y	Y	C	Y	Y	C	C	Y	Y	C	C	C	C	Y
S782_1988	G/C	782	1988	+	NA	G	G	S	S	G	S	S	G	G	H	G	S	G	S	S	S	S	G	G	G	G	S	G	G	G	S	G	S	G	S	S	H	S	G	G	G	G	G	G	N	H	G	G	S
S782_53005	T/C	782	53005	+	NA	T	T	Y	Y	T	Y	Y	T	T	Y	T	Y	T	Y	Y	Y	Y	T	T	T	T	Y	T	T	T	Y	T	Y	T	Y	Y	Y	Y	T	T	T	T	T	T	N	T	T	T	Y
S784_33145	G/C	784	33145	+	NA	S	S	N	G	S	G	G	G	S	H	S	S	G	G	G	S	G	G	G	G	S	G	G	G	S	S	S	S	S	H	S	G	S	G	G	G	G	G	G	N	G	G	G	S
S785_20571	G/T	785	20571	+	NA	G	K	G	G	G	K	G	G	G	G	K	K	G	G	G	G	K	K	K	G	K	G	G	G	G	G	G	G	G	K	G	G	K	G	G	G	G	K	G	G	G	K	G	G
S787_7436	A/G	787	7436	+	NA	R	A	R	A	R	R	A	R	R	A	A	A	R	R	A	A	A	A	A	A	R	R	R	R	R	A	A	A	R	R	A	R	A	R	A	A	A	R	R	R	N	A	R	A
S788_71961	C/A	788	71961	+	NA	C	C	M	M	C	M	C	C	C	C	M	M	C	M	C	M	M	C	C	C	M	M	C	C	C	H	M	M	C	M	C	H	M	C	C	C	C	M	C	H	C	M	C	C
S791_10415	G/A	791	10415	+	NA	G	G	G	G	R	N	R	R	G	G	R	N	G	G	G	R	R	N	R	R	R	G	G	R	R	G	R	R	R	G	G	H	G	N	G	G	G	G	G	G	N	H	R	R
S794_18687	C/T	794	18687	+	NA	C	Y	C	Y	Y	Y	Y	Y	C	C	Y	C	C	C	Y	Y	Y	Y	Y	Y	Y	C	C	Y	Y	C	Y	Y	Y	C	C	Y	C	Y	C	C	C	C	C	C	C	Y	Y	Y
S795_15171	A/G	795	15171	+	NA	A	R	A	A	R	R	R	R	R	R	R	H	R	A	A	R	H	R	R	A	R	A	A	R	R	A	R	R	R	A	A	R	R	A	A	A	R	A	A	N	A	R	A	R
S796_8267	C/G	796	8267	+	NA	C	S	C	C	C	C	S	C	S	S	C	S	S	S	S	C	S	H	S	C	C	C	S	H	C	S	C	C	C	C	C	C	C	C	S	S	S	S	C	C	C	S	S	C
S798_3055	A/T	798	3055	+	NA	A	A	A	A	W	A	A	W	W	A	A	A	A	W	A	W	A	A	A	W	A	A	W	A	A	W	A	A	W	W	A	A	A	A	W	A	W	A	W	H	A	A	W	A
S803_43570	A/G	803	43570	+	NA	A	R	A	A	A	A	R	R	R	R	R	A	A	R	A	R	R	A	A	R	A	A	R	R	R	A	R	A	A	A	R	A	A	A	R	R	A	R	A	A	R	R	R	R
S804_8571	A/G	804	8571	+	NA	A	A	H	A	R	H	A	R	A	R	R	R	R	R	H	R	R	A	A	A	R	R	A	A	R	A	A	A	R	R	A	A	A	R	A	A	A	R	A	N	N	A	A	A
S805_36650	C/G	805	36650	+	NA	S	S	C	S	S	C	C	C	S	C	S	S	C	S	C	C	C	S	S	C	C	C	S	C	S	S	S	S	S	C	S	S	S	C	C	S	C	C	C	N	S	C	S	C
S806_4752	G/T	806	4752	+	NA	G	K	G	G	K	K	G	G	K	G	G	G	G	K	G	G	G	K	G	K	K	K	K	G	K	K	G	K	K	G	G	K	G	G	K	K	G	G	G	G	G	G	K	K
S809_1748	T/C	809	1748	+	NA	T	Y	Y	Y	Y	Y	Y	Y	T	T	Y	T	Y	T	Y	T	T	T	T	Y	Y	Y	Y	T	T	T	T	T	Y	T	Y	Y	T	Y	Y	T	T	Y	Y	T	T	T	T	Y
S811_33936	T/C	811	33936	+	NA	T	Y	T	T	T	T	T	T	Y	Y	T	Y	T	Y	Y	T	Y	Y	Y	T	Y	T	T	Y	T	Y	T	T	T	T	T	T	Y	T	T	T	Y	Y	T	T	T	Y	T	T
S815_13028	C/T	815	13028	+	NA	Y	Y	Y	Y	C	C	Y	C	C	Y	Y	Y	Y	Y	Y	Y	Y	C	C	Y	C	Y	C	C	Y	Y	C	Y	Y	Y	Y	Y	C	C	C	C	C	Y	C	Y	Y	C	C	Y
S816_13008	A/T	816	13008	+	NA	A	A	W	W	A	W	A	W	A	A	W	A	W	A	W	A	A	A	A	W	W	A	W	A	A	A	W	A	W	A	W	W	A	W	W	A	A	W	W	N	A	A	A	W
S818_6631	T/C	818	6631	+	NA	T	T	T	Y	Y	T	T	T	T	Y	Y	T	T	T	T	Y	Y	T	T	T	Y	T	Y	T	T	Y	T	Y	T	T	Y	T	T	T	Y	Y	T	T	T	H	T	T	T	Y
S818_66682	G/A	818	66682	+	NA	G	G	G	R	R	R	G	G	G	R	R	R	G	G	G	R	R	G	G	G	R	G	R	G	R	R	G	R	G	G	R	G	R	G	R	R	G	G	G	H	G	R	G	R
S820_14104	C/G	820	14104	+	NA	C	S	S	S	S	C	S	C	C	C	S	S	S	C	C	C	C	C	C	C	C	C	S	C	S	S	C	C	S	C	S	S	S	C	S	C	C	C	C	C	H	C	S	C
S822_6059	C/A	822	6059	+	NA	M	M	C	M	M	C	C	C	M	C	M	M	C	C	C	C	C	C	C	C	C	C	M	C	M	M	C	M	M	C	M	M	M	C	C	C	C	C	C	C	M	C	M	C
S823_6533	G/T	823	6533	+	NA	G	K	G	K	G	H	K	K	G	G	G	K	G	G	K	G	H	G	K	H	K	G	G	K	G	K	G	K	K	G	G	N	G	G	H	K	G	G	H	N	G	K	G	G
S828_28234	A/T	828	28234	+	NA	W	A	A	A	W	A	W	A	W	W	W	W	A	A	A	W	A	A	A	A	W	A	A	A	W	W	W	W	W	W	A	W	W	A	A	A	A	W	A	H	A	A	A	W
S830_15079	C/T	830	15079	+	NA	C	Y	C	C	C	N	Y	Y	Y	Y	Y	C	C	Y	C	Y	Y	C	C	Y	C	C	Y	Y	Y	C	Y	C	C	C	Y	C	C	C	Y	Y	C	Y	C	N	Y	H	Y	Y
S833_9949	C/A	833	9949	+	NA	M	C	M	C	M	N	C	H	M	M	C	C	M	M	C	C	H	C	C	C	M	M	C	N	M	C	C	C	M	C	C	H	M	M	C	C	C	C	C	N	H	C	M	M
S836_6904	G/A	836	6904	+	NA	R	R	G	R	R	G	G	G	G	G	R	R	R	G	G	G	G	G	G	G	G	G	R	G	R	R	G	G	R	G	R	G	R	G	G	G	G	G	G	N	H	G	R	G
S843_21078	G/A	843	21078	+	NA	G	R	G	G	G	G	G	R	R	G	R	G	G	G	G	R	G	G	G	R	G	G	R	R	R	G	R	G	G	G	R	N	G	G	R	R	G	R	G	G	N	G	H	H
S844_20901	T/C	844	20901	+	NA	T	T	Y	Y	T	Y	T	Y	T	T	Y	Y	Y	T	Y	T	T	T	T	Y	T	T	Y	T	T	Y	Y	T	Y	T	Y	Y	T	T	Y	T	T	Y	Y	T	T	T	T	Y
S845_9387	G/T	845	9387	+	NA	G	G	K	K	G	K	G	G	G	G	K	K	G	K	G	K	K	G	G	K	K	K	G	G	G	K	K	K	G	K	K	G	G	G	G	G	G	K	G	K	G	K	G	G
S846_15052	G/A	846	15052	+	NA	G	R	G	G	G	G	R	G	R	R	G	R	R	R	R	G	H	G	R	G	G	G	R	H	G	R	G	G	G	G	G	G	G	G	R	R	N	R	G	G	G	R	R	G
S850_12213	C/T	850	12213	+	NA	C	Y	C	C	C	C	Y	Y	Y	Y	C	C	C	Y	C	C	C	Y	Y	C	C	C	Y	C	C	C	C	C	Y	C	C	C	C	C	Y	Y	Y	C	Y	Y	C	Y	Y	C
S851_14792	T/C	851	14792	+	NA	Y	Y	T	Y	T	T	Y	T	Y	T	T	T	T	Y	T	T	Y	Y	Y	T	T	Y	T	T	Y	T	Y	Y	Y	T	T	Y	Y	T	T	T	Y	Y	T	Y	Y	T	T	T
S852_5598	C/T	852	5598	+	NA	Y	Y	C	C	C	N	C	C	Y	Y	Y	C	C	Y	C	Y	N	C	C	Y	C	C	C	Y	Y	C	Y	C	C	C	C	N	Y	C	Y	Y	C	Y	C	C	Y	C	Y	Y
S853_7171	C/A	853	7171	+	NA	C	C	C	M	M	M	C	C	M	M	M	C	C	C	M	C	M	C	C	C	M	C	M	M	C	C	C	M	C	C	C	M	M	C	C	M	M	C	C	H	C	C	M	M
S855_56762	C/T	855	56762	+	NA	C	C	Y	Y	C	Y	C	Y	C	C	Y	Y	Y	C	Y	C	C	C	C	Y	Y	C	Y	C	C	Y	Y	C	Y	C	Y	Y	C	Y	Y	C	C	Y	Y	C	C	C	C	Y
S857_11768	T/C	857	11768	+	NA	T	Y	T	T	Y	Y	Y	T	Y	T	T	Y	T	Y	Y	Y	H	T	T	Y	T	T	H	Y	T	T	Y	T	T	T	T	T	T	T	Y	Y	H	Y	T	T	T	Y	Y	T
S862_36043	C/T	862	36043	+	NA	C	Y	C	C	C	C	C	C	Y	Y	C	Y	C	Y	Y	C	Y	C	Y	C	Y	C	C	Y	C	Y	C	C	C	C	C	C	Y	Y	C	C	Y	Y	C	C	C	C	C	C
S866_13863	C/T	866	13863	+	NA	C	Y	C	C	C	C	Y	Y	Y	Y	C	C	C	Y	C	C	C	Y	Y	C	C	C	Y	C	C	C	C	C	Y	Y	C	C	C	C	Y	Y	Y	C	Y	Y	C	C	Y	C
S867_33125	A/G	867	33125	+	NA	A	R	A	A	A	A	A	A	A	R	R	R	A	A	R	A	R	R	R	A	R	A	A	A	A	R	A	A	A	A	A	R	R	R	A	A	A	R	A	A	A	R	A	A
S868_4881	T/A	868	4881	+	NA	W	T	W	T	W	T	T	W	W	W	T	W	W	W	T	T	T	T	T	T	W	W	W	T	W	T	T	T	W	W	T	W	T	W	T	T	T	W	W	W	W	T	W	T
S869_32903	G/A	869	32903	+	NA	H	R	G	R	G	G	R	G	G	R	G	R	G	R	G	R	R	G	G	G	G	R	G	G	G	R	G	R	G	R	R	G	R	G	G	G	G	G	G	N	H	G	G	R
S870_2841	T/A	870	2841	+	NA	T	W	T	T	W	W	W	W	T	T	W	T	W	T	W	W	W	T	T	T	T	T	T	T	W	T	W	W	W	T	T	N	T	T	T	T	T	T	T	N	T	N	W	T
S872_15551	C/G	872	15551	+	NA	S	C	S	C	S	S	S	C	S	C	C	C	S	H	C	C	C	C	C	C	C	S	S	S	S	C	C	C	S	C	C	S	C	C	C	C	C	S	S	C	C	S	S	C
S874_13438	A/C	874	13438	+	NA	M	M	A	M	M	A	A	A	M	A	M	M	A	A	A	A	A	M	M	A	A	A	M	A	M	M	M	M	M	A	M	M	M	A	A	M	A	A	A	A	M	A	M	A
S877_9528	G/A	877	9528	+	NA	G	G	R	R	G	R	G	R	G	G	R	R	G	G	R	G	G	G	G	R	R	G	R	G	G	R	R	G	R	G	H	R	G	R	R	G	G	R	R	G	N	G	G	R
S880_17533	C/T	880	17533	+	NA	C	Y	C	C	C	C	Y	Y	Y	Y	C	C	C	Y	C	C	C	Y	Y	C	C	C	Y	C	C	C	C	C	Y	C	C	C	C	C	Y	Y	Y	C	Y	H	C	C	Y	C
S882_7712	T/C	882	7712	+	NA	T	T	T	Y	Y	T	Y	T	Y	Y	Y	T	T	T	T	Y	H	N	T	T	T	T	Y	T	T	T	T	Y	T	T	T	T	Y	T	T	T	Y	T	T	N	T	T	Y	Y
S888_13019	G/A	888	13019	+	NA	G	G	R	R	G	R	G	G	G	G	R	R	G	R	G	R	R	G	G	G	R	R	G	G	G	R	R	R	G	R	R	R	R	G	G	G	G	R	G	R	G	R	G	G
S891_3142	T/A	891	3142	+	NA	T	W	T	T	T	T	W	W	W	W	W	T	T	W	T	W	T	T	T	W	T	T	T	W	W	N	W	T	T	T	W	T	T	T	W	W	T	W	T	T	T	T	W	W
S892_19474	A/G	892	19474	+	NA	R	R	A	R	R	A	A	A	H	A	R	R	A	R	A	A	A	R	H	A	A	A	R	A	H	R	R	R	H	A	A	R	R	A	A	R	A	A	A	A	H	A	A	A
S893_17245	G/T	893	17245	+	NA	K	K	K	K	G	K	K	G	G	K	G	K	G	K	G	K	G	G	G	G	G	K	G	G	G	K	G	K	G	H	K	G	K	G	G	G	G	G	G	N	K	G	G	K
S895_1275	T/C	895	1275	+	NA	T	T	Y	T	Y	T	T	Y	Y	T	Y	T	Y	Y	T	Y	T	T	T	Y	T	T	Y	T	Y	Y	Y	Y	Y	Y	T	T	T	T	T	T	Y	T	Y	Y	Y	Y	T	T
S899_8178	A/T	899	8178	+	NA	A	A	W	A	A	W	A	W	A	W	A	W	W	A	A	A	A	N	A	W	A	A	W	A	A	A	W	A	W	A	W	H	W	A	H	A	A	A	A	N	A	A	A	W
S900_19106	G/T	900	19106	+	NA	K	K	G	G	G	K	K	G	K	K	K	G	G	K	G	K	G	G	G	K	G	G	K	K	K	G	K	G	G	G	K	G	K	G	K	K	G	K	G	G	K	G	K	K
S902_32092	C/T	902	32092	+	NA	C	C	C	C	Y	C	C	Y	Y	C	C	C	Y	Y	C	Y	C	C	C	Y	C	C	Y	C	C	Y	Y	C	Y	Y	C	C	C	C	Y	C	Y	C	Y	N	N	C	Y	C
S903_8842	T/A	903	8842	+	NA	T	T	W	W	W	W	T	T	T	T	W	W	W	T	T	T	T	T	T	W	W	W	W	T	T	W	H	T	H	T	W	H	T	W	T	T	T	W	H	T	N	T	T	W
S905_6005	A/G	905	6005	+	NA	A	R	A	A	R	R	R	H	R	A	R	A	R	A	R	R	R	R	R	R	R	A	A	R	R	A	R	R	H	A	A	A	R	N	A	A	R	A	A	A	R	H	R	A
S909_25015	A/G	909	25015	+	NA	R	R	A	R	A	A	R	A	R	H	R	A	A	R	A	A	A	R	R	A	A	R	A	A	R	A	R	R	R	A	A	N	R	A	A	A	R	R	A	A	A	A	R	A
S910_2362	C/T	910	2362	+	NA	C	Y	C	C	Y	Y	Y	Y	Y	Y	Y	Y	Y	C	C	Y	Y	Y	Y	C	Y	C	C	Y	Y	C	Y	Y	Y	C	C	Y	Y	Y	C	C	Y	C	C	Y	C	Y	Y	Y
S911_14615	G/A	911	14615	+	NA	R	G	R	G	R	R	R	R	R	G	G	G	R	R	G	G	G	G	G	G	R	R	R	R	R	G	G	G	R	R	G	R	G	R	G	G	G	R	R	R	R	G	R	G
S913_33509	A/T	913	33509	+	NA	A	W	A	A	A	A	W	W	W	W	A	A	A	W	A	A	A	W	W	A	A	A	W	A	A	A	A	A	W	W	A	A	A	A	W	W	W	A	W	A	A	W	W	A
S916_37882	T/A	916	37882	+	NA	T	W	W	T	T	T	W	T	W	W	T	W	T	W	W	T	W	W	W	T	T	T	T	W	T	W	T	T	T	T	T	T	T	T	T	T	W	W	T	T	T	W	T	T
S917_20243	C/T	917	20243	+	NA	C	C	C	Y	Y	Y	Y	C	Y	Y	Y	C	C	C	Y	C	Y	C	C	C	Y	C	Y	Y	C	C	C	Y	C	C	Y	Y	Y	C	C	Y	C	C	C	C	C	C	C	Y
S918_12909	G/C	918	12909	+	NA	G	H	G	G	G	S	S	G	S	S	S	G	G	S	G	S	G	G	G	S	G	G	N	S	G	G	S	G	G	G	S	G	H	G	S	G	G	G	G	N	N	G	S	S
S920_5057	G/C	920	5057	+	NA	G	S	G	S	S	N	G	G	S	G	S	G	G	G	G	G	G	G	S	G	G	G	S	G	S	S	S	S	S	G	H	S	H	G	G	S	G	G	G	N	H	G	S	G
S921_1804	T/C	921	1804	+	NA	T	Y	T	T	T	T	T	T	T	T	Y	Y	T	T	Y	T	Y	Y	Y	T	Y	T	T	T	T	Y	T	T	T	T	T	Y	Y	Y	T	T	T	Y	T	T	T	Y	T	T
S922_8697	T/G	922	8697	+	NA	T	K	T	T	T	K	K	T	K	T	T	K	T	K	K	T	K	T	T	T	T	T	K	K	T	T	K	T	T	T	T	T	T	T	K	K	K	K	T	T	T	K	K	T
S925_12507	A/G	925	12507	+	NA	A	A	R	A	R	A	A	R	R	A	A	A	R	R	A	R	A	A	A	R	A	A	R	A	R	R	R	R	R	R	A	A	A	A	A	A	R	A	R	H	R	R	A	A
S928_14483	T/C	928	14483	+	NA	Y	Y	Y	Y	T	Y	Y	T	T	Y	T	Y	T	Y	Y	Y	Y	T	T	T	T	Y	T	T	T	Y	T	Y	T	Y	Y	Y	Y	T	T	T	T	T	T	Y	Y	T	T	Y
S929_7737	A/C	929	7737	+	NA	M	M	M	M	A	M	M	A	A	M	A	M	A	M	M	M	H	A	A	A	A	A	A	A	A	A	A	M	A	M	M	M	M	A	A	A	A	A	A	A	H	A	A	M
S932_230	A/G	932	230	+	NA	A	A	A	R	A	R	A	A	A	R	R	R	A	A	N	A	R	A	A	A	R	A	R	A	R	A	A	R	A	A	R	A	R	A	R	R	A	A	A	R	A	A	A	R
S934_6716	G/A	934	6716	+	NA	G	R	N	G	R	G	R	R	R	G	R	G	R	G	N	R	R	R	R	H	R	G	G	G	R	G	R	R	R	N	G	R	R	R	G	G	R	G	G	G	R	R	R	R
S935_22307	T/C	935	22307	+	NA	Y	Y	Y	Y	T	T	Y	T	Y	Y	Y	Y	T	T	T	T	Y	N	Y	T	T	Y	T	T	Y	Y	Y	Y	T	T	T	Y	T	T	T	T	Y	Y	T	H	T	T	Y	Y
S937_11714	G/T	937	11714	+	NA	G	G	G	K	K	N	K	G	G	G	K	K	K	G	G	G	G	N	G	G	G	G	K	G	K	G	G	G	K	G	K	G	K	G	G	G	G	G	G	G	H	G	K	G
S938_7770	A/T	938	7770	+	NA	W	W	H	W	A	A	W	A	A	W	W	N	W	W	W	W	A	N	A	W	W	W	A	A	W	W	A	A	W	W	W	W	A	W	A	A	A	A	A	N	N	A	A	A
S939_25188	A/G	939	25188	+	NA	R	R	A	A	A	R	R	A	R	R	R	A	A	R	A	R	A	A	A	R	A	A	H	R	R	A	R	A	A	A	R	A	R	A	R	R	A	R	A	A	R	A	R	R
S940_62425	G/T	940	62425	+	NA	K	K	G	K	K	G	G	G	K	G	K	K	G	G	G	G	G	G	G	G	G	G	K	G	K	K	K	K	K	G	K	K	K	G	G	G	G	G	G	G	H	G	K	G
S941_12780	A/G	941	12780	+	NA	R	R	R	R	A	R	A	A	A	R	A	R	A	R	A	R	R	A	A	A	A	A	A	A	A	A	A	R	A	R	A	A	A	A	A	A	A	A	A	R	R	A	A	R
S942_6094	T/C	942	6094	+	NA	T	Y	T	Y	Y	T	Y	T	T	T	Y	Y	Y	T	T	T	T	T	T	T	T	T	Y	T	Y	Y	T	T	Y	T	Y	Y	Y	T	T	T	T	T	T	T	N	T	Y	T
S944_20668	T/G	944	20668	+	NA	T	T	K	K	T	K	K	T	T	K	T	K	T	K	K	K	K	T	T	T	T	K	T	T	T	K	T	K	T	K	K	K	K	T	T	T	T	T	T	N	K	T	T	K
S945_1773	T/C	945	1773	+	NA	Y	T	Y	T	Y	T	T	T	Y	Y	T	T	Y	Y	T	T	T	T	T	T	Y	Y	Y	T	Y	T	T	T	Y	Y	T	H	T	H	T	T	T	Y	Y	Y	H	N	Y	T
S947_651	T/G	947	651	+	NA	T	K	T	K	K	T	K	T	K	K	K	T	T	T	T	K	K	T	T	T	T	T	K	K	T	T	T	K	T	T	T	K	T	T	T	T	K	T	T	T	T	T	K	K
S948_9992	T/C	948	9992	+	NA	T	Y	T	T	Y	N	Y	Y	Y	Y	Y	T	Y	T	T	Y	Y	N	Y	T	Y	T	T	Y	Y	T	Y	Y	Y	T	T	N	Y	T	T	T	Y	T	T	Y	T	Y	Y	Y
S951_18378	A/T	951	18378	+	NA	W	W	W	W	A	A	W	A	A	W	W	W	W	W	W	W	W	A	A	W	A	W	A	A	W	W	A	A	W	W	W	H	A	A	A	A	A	W	A	W	A	A	A	A
S953_22353	T/A	953	22353	+	NA	T	W	T	T	T	W	T	T	T	T	W	W	T	T	T	T	W	W	W	T	W	T	T	T	T	T	T	T	T	T	T	W	W	W	T	T	T	W	T	T	T	W	T	T
S956_8153	G/T	956	8153	+	NA	K	K	G	G	G	H	K	K	K	K	K	G	G	K	N	K	G	G	G	K	G	G	K	K	K	G	K	G	G	G	K	G	G	G	K	K	G	K	G	G	N	G	K	K
S957_7187	G/A	957	7187	+	NA	G	R	G	G	R	R	R	R	R	R	R	R	R	G	R	R	R	R	R	G	R	G	G	R	R	G	R	R	R	G	G	R	R	R	G	G	R	G	G	R	G	R	R	R
S960_32579	G/A	960	32579	+	NA	G	R	G	R	G	G	H	R	G	G	G	G	G	G	H	G	N	H	R	R	R	G	R	R	R	R	G	R	R	G	G	N	G	G	H	R	N	G	G	G	N	N	G	G
S961_14317	C/G	961	14317	+	NA	C	C	C	S	S	S	C	C	C	S	S	S	C	C	C	C	S	C	C	C	S	C	S	C	S	S	C	S	C	C	S	S	C	C	S	S	C	C	C	N	C	C	C	S
S962_28531	T/G	962	28531	+	NA	K	K	K	K	T	T	K	T	T	H	K	K	K	K	T	K	K	T	T	K	T	K	T	T	K	K	T	K	K	K	K	N	T	T	T	T	T	H	T	T	K	T	T	K
S963_7543	A/T	963	7543	+	NA	A	A	W	W	A	W	A	W	A	A	W	W	W	A	W	A	A	A	A	W	W	A	W	A	A	W	W	A	W	A	W	W	A	W	W	A	A	W	W	A	A	A	A	W
S964_6348	G/A	964	6348	+	NA	G	R	G	R	G	G	G	R	G	G	G	G	G	G	R	G	N	R	R	R	R	G	G	R	H	R	G	R	R	R	G	G	G	H	H	R	G	G	R	N	G	G	G	G
S966_19801	G/T	966	19801	+	NA	K	K	K	K	G	K	K	G	G	K	G	K	G	K	K	K	K	G	G	G	G	K	G	G	G	K	G	K	G	K	K	H	K	N	G	G	G	G	G	G	N	G	G	K
S967_15494	T/C	967	15494	+	NA	T	T	Y	T	T	T	T	Y	T	T	T	Y	Y	T	Y	T	T	T	T	Y	T	T	Y	T	T	Y	Y	T	Y	T	Y	H	T	T	Y	T	T	Y	Y	T	T	T	T	Y
S968_7963	T/G	968	7963	+	NA	K	K	T	T	T	T	K	K	K	K	K	T	T	K	T	K	T	T	T	K	T	T	K	K	K	T	K	T	T	T	K	T	T	T	K	K	T	K	T	T	H	T	K	K
S969_12938	G/A	969	12938	+	NA	R	R	R	R	G	R	R	G	R	H	R	R	G	G	G	G	R	R	R	G	G	R	G	G	R	R	R	R	G	G	G	R	G	G	G	G	R	R	G	H	N	G	R	R
S971_15987	A/T	971	15987	+	NA	A	W	A	W	W	A	W	A	A	A	W	W	W	A	A	A	A	A	A	A	A	A	W	A	W	W	A	A	W	A	W	H	W	A	A	A	A	A	A	A	W	A	W	A
S971_68777	C/T	971	68777	+	NA	C	Y	C	Y	Y	C	Y	C	C	C	Y	Y	Y	C	C	C	N	C	C	C	C	C	Y	C	N	H	C	C	Y	C	Y	Y	Y	C	C	C	C	C	C	N	N	C	Y	C
S973_5144	A/G	973	5144	+	NA	A	R	A	A	A	A	A	A	A	A	R	R	A	A	R	A	R	R	R	A	R	A	A	A	A	R	A	A	A	A	A	R	A	R	A	A	A	R	A	A	A	R	A	A
S975_5082	C/T	975	5082	+	NA	Y	C	Y	Y	C	C	Y	C	C	Y	Y	Y	Y	Y	C	Y	C	C	C	Y	C	Y	C	C	Y	Y	C	Y	Y	Y	C	N	Y	C	C	C	C	Y	C	C	Y	Y	C	Y
S976_5353	A/G	976	5353	+	NA	A	A	A	A	R	R	R	A	A	A	R	A	R	A	R	R	A	R	R	R	R	A	A	R	R	A	R	R	R	A	A	N	A	N	A	A	A	A	N	R	N	N	R	R
S977_12066	G/T	977	12066	+	NA	G	K	G	G	G	G	K	K	K	K	G	G	G	K	G	G	G	K	K	G	G	G	K	G	G	G	G	G	K	K	G	N	G	G	K	K	K	G	K	N	G	G	K	G
S978_17534	C/A	978	17534	+	NA	C	M	M	M	M	C	M	M	C	C	M	C	M	C	M	C	C	C	C	M	M	M	C	C	M	C	C	C	M	C	M	C	C	M	M	C	C	M	M	C	C	C	C	M
S981_5304	T/C	981	5304	+	NA	T	T	T	Y	Y	Y	T	T	T	Y	Y	T	T	T	Y	T	Y	T	T	T	Y	T	Y	T	Y	Y	T	T	T	T	Y	Y	Y	T	Y	Y	T	T	T	H	N	T	T	Y
S982_33214	C/T	982	33214	+	NA	Y	Y	C	Y	C	C	Y	C	Y	C	C	C	C	Y	C	C	Y	Y	Y	C	C	Y	C	C	Y	C	Y	Y	Y	C	C	Y	Y	C	C	C	Y	Y	C	C	H	C	C	C
S984_23534	A/G	984	23534	+	NA	A	R	A	A	A	A	A	A	R	R	A	R	A	R	R	A	R	N	R	A	A	A	A	R	A	R	A	A	A	A	A	A	R	A	A	A	R	R	A	A	A	R	A	A
S987_8967	G/T	987	8967	+	NA	K	G	K	K	K	G	G	G	G	K	K	K	K	G	G	K	G	G	G	K	G	K	G	G	K	K	G	K	K	K	G	K	K	G	G	G	G	K	G	K	K	K	G	K
S988_3520	G/A	988	3520	+	NA	G	R	G	R	R	G	R	G	R	R	R	G	G	G	G	R	R	G	G	G	G	G	R	R	G	G	G	R	G	G	G	R	G	G	G	G	R	G	R	G	G	G	R	R
S990_23006	A/G	990	23006	+	NA	R	R	R	R	A	R	R	A	R	R	R	A	A	A	A	A	R	R	R	A	A	R	A	A	R	R	R	R	A	A	A	R	R	A	A	A	R	R	A	R	A	A	R	R
S992_2985	C/G	992	2985	+	NA	S	C	S	S	C	C	S	C	C	S	S	S	S	C	C	S	C	C	C	H	C	S	C	C	S	S	C	S	S	S	C	N	S	N	C	C	N	S	C	N	N	S	C	S
S994_10987	T/A	994	10987	+	NA	T	W	W	W	W	W	W	W	T	T	W	T	W	T	W	T	T	T	T	W	W	W	W	T	T	T	T	T	W	T	W	W	T	W	W	T	T	W	W	T	T	T	T	W
S995_969	G/T	995	969	+	NA	K	K	G	G	K	G	K	G	K	K	K	K	G	G	G	K	G	G	G	G	K	G	G	G	K	K	K	K	K	K	K	K	K	G	G	G	G	K	G	K	G	G	G	K
S998_9099	C/T	998	9099	+	NA	C	C	C	C	Y	H	Y	Y	H	Y	Y	H	Y	C	C	C	C	C	Y	C	Y	C	C	C	Y	C	Y	Y	Y	C	C	N	C	Y	C	C	Y	C	C	H	N	Y	Y	Y
S999_1117	A/G	999	1117	+	NA	R	R	R	A	A	R	R	A	A	R	A	R	A	R	R	R	R	A	A	A	A	R	A	A	A	A	A	R	A	R	R	R	R	A	A	A	A	A	A	R	R	A	A	R
S1002_5972	T/C	1002	5972	+	NA	T	T	Y	T	T	T	T	Y	T	T	T	Y	Y	T	N	T	T	T	T	Y	T	T	Y	T	T	Y	Y	T	Y	T	Y	T	T	T	Y	T	T	Y	T	T	T	T	T	Y
S1003_7159	A/G	1003	7159	+	NA	A	A	R	R	A	R	A	A	A	A	R	R	A	R	A	A	R	A	A	R	R	R	A	A	A	R	R	R	A	R	R	R	R	A	A	A	A	R	A	A	A	A	A	A
S1003_59297	G/C	1003	59297	+	NA	G	G	S	S	G	S	G	G	G	G	S	S	G	S	G	S	S	G	G	S	S	S	G	G	G	S	S	S	G	S	S	S	S	G	G	G	G	S	G	S	G	S	G	G
S1008_13019	T/A	1008	13019	+	NA	W	W	W	W	T	W	W	T	W	W	W	W	T	T	T	T	W	W	W	T	T	W	T	T	W	W	W	W	T	T	T	W	T	T	T	T	W	W	T	W	T	T	W	W
S1011_12637	T/C	1011	12637	+	NA	T	Y	T	T	T	Y	Y	T	Y	Y	T	Y	Y	Y	Y	T	Y	T	T	T	T	T	Y	Y	T	Y	Y	T	T	T	T	T	T	T	Y	Y	Y	Y	T	N	T	Y	Y	T
S1013_2337	C/T	1013	2337	+	NA	C	Y	Y	Y	Y	C	Y	C	C	C	Y	Y	Y	C	C	C	C	C	C	C	C	C	Y	C	Y	Y	C	C	Y	C	Y	Y	Y	C	Y	C	C	C	C	C	Y	C	Y	C
S1014_7575	T/C	1014	7575	+	NA	Y	Y	Y	Y	T	Y	Y	T	T	Y	T	Y	T	Y	T	Y	Y	T	T	T	T	Y	T	T	T	T	T	Y	T	Y	Y	H	Y	T	T	T	T	T	T	Y	T	T	T	Y
S1015_12834	C/T	1015	12834	+	NA	Y	C	Y	C	Y	Y	Y	C	Y	C	C	C	Y	Y	C	C	C	C	C	C	Y	Y	Y	Y	Y	C	C	C	Y	C	C	Y	C	Y	C	C	C	Y	Y	C	Y	C	Y	C
S1017_3278	A/G	1017	3278	+	NA	A	R	R	R	R	A	R	A	A	R	R	R	R	A	A	A	A	N	A	A	A	A	R	A	H	R	A	A	R	R	A	N	R	A	R	A	A	A	A	N	H	N	R	A
S1018_15758	T/C	1018	15758	+	NA	Y	Y	T	Y	T	T	Y	T	Y	Y	Y	T	T	Y	T	T	T	Y	Y	T	T	Y	T	T	Y	T	Y	Y	T	T	T	T	Y	T	T	T	Y	Y	T	N	T	T	Y	H
S1019_24985	A/C	1019	24985	+	NA	M	M	A	A	M	A	A	A	M	M	M	A	A	M	A	M	A	A	A	M	A	A	M	M	M	A	M	M	M	A	M	M	M	A	M	M	A	M	A	A	M	A	M	M
S1020_923	A/C	1020	923	+	NA	A	A	A	M	M	A	A	A	A	A	M	M	A	A	A	M	M	A	A	A	M	A	A	A	M	M	A	M	A	A	M	A	A	A	M	M	A	M	A	M	A	M	A	M
S1021_13325	G/T	1021	13325	+	NA	G	K	K	K	K	G	K	G	G	K	K	K	K	G	G	G	G	G	G	G	G	G	K	G	K	K	G	G	K	G	K	K	K	G	K	G	G	G	G	G	K	G	K	G
S1023_25855	C/T	1023	25855	+	NA	C	Y	Y	Y	Y	C	Y	Y	C	C	Y	C	Y	C	Y	C	C	C	C	C	Y	Y	Y	C	Y	C	C	Y	Y	C	Y	Y	C	Y	Y	C	C	Y	Y	C	C	C	C	C
S1024_6468	C/T	1024	6468	+	NA	C	Y	C	C	C	Y	Y	C	Y	Y	Y	C	Y	C	N	Y	Y	C	Y	Y	Y	C	C	Y	Y	C	Y	Y	Y	C	C	H	Y	Y	C	C	Y	C	C	N	N	H	Y	Y
S1025_3089	C/T	1025	3089	+	NA	Y	C	Y	Y	C	Y	Y	C	C	Y	C	C	C	Y	N	Y	Y	C	C	C	C	Y	C	C	C	Y	C	Y	C	Y	C	C	Y	C	C	C	C	C	C	N	Y	C	C	Y
S1026_8383	A/G	1026	8383	+	NA	A	R	A	A	A	A	R	R	R	R	A	A	A	R	A	A	A	R	R	A	A	A	R	A	A	A	A	A	R	A	A	A	A	A	R	R	R	A	R	N	A	H	R	A
S1028_2298	T/C	1028	2298	+	NA	T	Y	T	T	Y	T	Y	Y	Y	Y	T	T	T	Y	T	T	T	T	T	T	T	T	Y	T	T	Y	T	T	Y	Y	T	T	T	T	Y	Y	Y	T	Y	Y	T	T	Y	T
S1029_8160	T/C	1029	8160	+	NA	T	Y	Y	Y	Y	T	Y	T	T	T	Y	Y	Y	T	T	T	T	T	T	T	T	T	Y	T	Y	Y	T	T	Y	T	Y	Y	Y	T	Y	T	T	T	T	T	T	T	Y	T
S1030_6880	G/T	1030	6880	+	NA	G	K	G	G	G	G	K	G	K	K	G	K	K	K	K	G	K	K	K	G	G	G	G	K	G	K	G	G	G	G	G	G	G	G	G	G	K	K	G	G	G	K	K	G
S1033_14146	A/G	1033	14146	+	NA	A	R	A	A	A	A	R	A	R	R	A	R	R	R	H	A	R	R	R	A	A	A	A	R	A	R	A	A	A	A	A	A	A	A	A	A	R	R	A	A	A	R	R	A
S1037_9426	T/G	1037	9426	+	NA	T	K	T	T	T	T	T	T	K	K	T	K	T	K	K	T	K	K	K	T	K	T	T	T	T	K	T	T	T	T	T	K	K	K	T	T	K	K	T	T	T	K	T	T
S1038_11283	A/G	1038	11283	+	NA	A	R	A	A	R	R	R	R	R	A	R	N	R	R	R	R	R	R	R	A	R	A	A	R	R	A	R	R	R	A	A	R	R	R	A	A	R	A	A	N	A	R	R	R
S1040_11733	G/A	1040	11733	+	NA	R	R	G	R	R	G	G	G	G	G	R	R	R	G	G	G	G	G	G	G	G	G	R	G	R	R	G	G	R	G	R	G	R	G	G	G	G	G	G	G	N	G	R	G
S1041_2622	G/C	1041	2622	+	NA	G	S	S	S	S	G	S	S	G	G	S	G	S	G	S	G	G	G	G	S	S	S	S	G	S	G	G	G	S	G	S	S	G	S	S	G	G	S	S	G	G	G	G	S
S1043_13730	A/G	1043	13730	+	NA	R	R	A	A	A	H	R	A	R	R	R	R	A	A	A	R	A	A	A	R	A	A	R	R	R	A	R	A	A	A	R	A	A	A	R	R	A	R	N	A	H	A	R	R
S1047_12480	A/G	1047	12480	+	NA	R	R	R	R	A	R	R	A	A	R	A	R	A	R	R	R	R	A	A	A	A	R	A	A	A	R	A	R	A	R	R	R	R	A	A	A	A	A	A	R	R	A	A	R
S1052_18801	G/A	1052	18801	+	NA	R	R	R	R	G	R	R	G	G	R	R	R	R	R	R	R	R	G	G	R	R	R	G	G	R	R	G	G	R	R	G	R	G	R	G	G	G	G	G	R	G	G	G	G
S1054_14068	A/C	1054	14068	+	NA	A	M	A	A	A	M	M	A	M	A	A	M	M	M	M	A	A	A	A	A	A	A	M	M	A	A	M	A	A	A	A	N	A	A	M	M	M	M	A	N	A	A	M	A
S1056_8511	A/G	1056	8511	+	NA	R	H	A	A	A	R	A	A	H	R	R	A	A	A	A	A	A	A	A	R	A	A	R	R	R	A	R	A	N	A	R	A	R	A	R	R	A	R	A	A	A	A	R	R
S1059_2712	T/C	1059	2712	+	NA	T	T	Y	T	T	Y	T	Y	T	T	T	Y	Y	T	T	T	T	T	T	Y	T	T	Y	T	T	Y	Y	T	Y	T	Y	Y	T	T	Y	T	T	Y	T	T	T	T	T	Y
S1060_9429	C/T	1060	9429	+	NA	Y	C	Y	Y	C	Y	Y	C	Y	Y	Y	Y	C	C	C	C	Y	Y	Y	C	C	Y	C	C	Y	Y	Y	Y	C	C	C	C	C	C	C	C	Y	Y	C	Y	C	C	Y	Y
S1061_7520	A/T	1061	7520	+	NA	W	W	A	A	W	A	A	A	W	W	W	W	A	A	A	W	A	A	A	W	A	A	W	A	W	W	W	W	W	A	W	W	W	A	W	W	A	W	A	A	W	A	W	W
S1063_9594	A/T	1063	9594	+	NA	W	A	W	A	W	A	A	W	W	W	A	W	W	W	A	A	A	A	A	A	W	W	W	A	W	A	A	A	A	A	A	W	A	W	A	A	A	W	A	A	A	A	W	A
S1064_27328	G/A	1064	27328	+	NA	G	R	G	R	R	G	R	G	G	G	R	R	R	G	G	G	G	G	G	G	G	G	R	G	R	R	G	G	R	G	R	R	R	G	G	G	G	G	G	G	R	G	R	G
S1065_25798	A/T	1065	25798	+	NA	A	W	W	W	W	A	W	A	A	W	W	W	W	A	A	A	A	A	A	A	A	A	W	A	W	H	A	A	H	A	W	A	W	N	W	A	A	A	A	A	N	A	W	A
S1066_5137	C/T	1066	5137	+	NA	Y	C	Y	Y	C	C	Y	C	C	H	Y	H	Y	Y	C	Y	C	C	C	Y	C	Y	Y	C	Y	Y	C	Y	C	Y	C	C	Y	C	C	C	C	Y	C	H	C	Y	C	Y
S1067_33099	A/G	1067	33099	+	NA	R	R	A	R	A	A	R	A	R	A	A	A	A	R	A	A	R	R	R	A	A	R	A	A	R	A	R	R	R	A	A	N	R	A	A	A	R	R	A	H	H	A	A	A
S1068_31525	A/T	1068	31525	+	NA	A	A	A	W	W	N	W	A	W	W	W	A	A	A	W	W	W	A	A	A	A	A	W	W	A	A	A	W	A	A	A	H	W	A	A	W	W	A	A	N	A	A	W	W
S1070_12839	A/G	1070	12839	+	NA	A	R	A	A	R	R	R	R	A	A	R	A	R	A	R	R	R	R	R	R	R	A	A	R	R	A	R	R	R	A	A	R	A	R	A	A	A	A	A	R	A	R	R	R
S1071_2646	A/T	1071	2646	+	NA	A	W	A	A	A	A	W	W	W	W	A	A	A	W	A	A	A	W	W	A	A	A	W	A	A	A	A	A	W	W	A	A	A	A	W	W	W	A	W	W	A	A	W	A
S1072_26271	C/A	1072	26271	+	NA	C	C	C	C	M	C	C	M	M	C	C	C	C	M	C	M	C	C	C	M	C	C	M	C	C	M	C	C	H	M	C	C	C	C	M	C	M	C	H	M	C	C	M	C
S1073_25250	G/C	1073	25250	+	NA	G	G	G	G	S	G	S	S	S	G	G	G	G	S	G	G	G	G	G	S	G	G	S	G	G	S	G	G	S	S	G	G	G	G	S	G	S	G	S	S	G	G	S	G
S1075_25440	G/A	1075	25440	+	NA	R	G	R	G	R	R	R	G	R	G	G	G	R	R	G	G	G	G	G	G	R	R	R	R	R	G	G	G	R	G	G	R	G	R	G	G	G	R	R	R	R	G	R	G
S1077_38131	C/T	1077	38131	+	NA	C	C	Y	Y	C	Y	Y	C	C	Y	C	Y	C	Y	Y	Y	Y	C	C	C	C	Y	C	C	C	Y	C	Y	C	Y	Y	Y	Y	C	C	C	C	C	C	Y	Y	C	C	C
S1082_5693	G/T	1082	5693	+	NA	G	G	G	K	K	K	K	G	K	K	K	G	G	G	K	G	K	G	G	G	K	G	K	K	K	G	G	K	G	G	K	K	K	G	G	K	G	G	G	G	G	G	G	K
S1084_6689	T/A	1084	6689	+	NA	W	W	W	W	T	T	W	T	T	W	W	W	W	W	H	W	W	T	T	W	T	W	T	T	W	W	T	W	W	W	W	H	T	T	T	T	T	W	T	T	H	N	T	T
S1086_36906	T/G	1086	36906	+	NA	T	T	T	K	K	K	T	T	T	K	K	T	T	T	K	K	K	T	T	T	K	T	K	T	K	K	T	K	T	T	K	K	K	T	K	K	T	T	T	N	T	T	T	K
S1087_8314	T/A	1087	8314	+	NA	T	W	W	W	W	T	W	T	T	W	W	W	W	T	T	T	T	T	T	T	T	T	W	T	W	W	T	T	W	T	W	W	W	T	W	T	T	T	T	T	W	T	W	T
S1089_24117	C/A	1089	24117	+	NA	M	M	M	M	C	M	M	C	C	M	C	M	C	M	H	M	M	C	C	C	C	M	C	C	C	M	C	M	C	M	M	N	M	C	C	C	C	C	C	H	H	C	C	C
S1093_15802	G/A	1093	15802	+	NA	R	R	G	G	G	R	R	G	R	R	R	G	G	R	G	R	G	G	G	R	G	G	R	R	R	G	R	G	G	G	R	G	R	G	R	R	G	R	G	G	R	G	R	R
S1099_3567	G/C	1099	3567	+	NA	H	S	H	S	G	G	S	G	S	S	S	N	G	G	G	G	S	G	S	G	G	S	G	G	S	S	S	S	G	G	G	G	G	G	G	G	G	S	G	G	G	G	S	H
S1100_41107	C/A	1100	41107	+	NA	C	M	C	C	M	C	M	M	M	M	C	C	C	M	C	C	C	C	C	C	C	C	M	C	C	M	C	C	M	M	C	C	C	C	M	M	C	C	M	M	N	C	M	C
S1101_541	G/A	1101	541	+	NA	G	R	G	G	G	G	G	G	R	R	G	R	G	R	R	G	R	R	R	G	R	G	G	R	G	H	G	G	G	G	G	G	R	R	G	G	G	R	G	G	G	R	G	G
S1103_8161	G/C	1103	8161	+	NA	G	G	G	S	S	S	G	G	G	S	S	S	G	G	S	S	S	G	G	G	S	G	S	G	S	S	G	S	G	G	S	S	S	G	S	S	G	G	G	H	G	G	G	S
S1104_6211	A/T	1104	6211	+	NA	W	A	W	A	W	W	W	H	W	A	A	A	W	W	A	A	A	A	A	A	W	W	W	W	W	A	A	A	W	W	A	W	A	H	A	A	A	W	W	A	H	A	W	A
S1104_62729	C/T	1104	62729	+	NA	Y	C	Y	C	Y	Y	Y	Y	Y	C	C	C	Y	Y	C	C	C	C	C	C	Y	Y	Y	Y	Y	C	C	C	Y	Y	C	Y	C	Y	C	C	C	Y	Y	Y	Y	C	Y	C
S1108_8372	A/G	1108	8372	+	NA	A	R	R	H	R	A	R	R	A	A	R	A	R	A	R	A	A	A	A	R	R	R	H	A	R	A	A	A	R	A	R	A	A	R	R	A	A	R	R	A	N	A	A	R
S1110_3640	T/C	1110	3640	+	NA	Y	Y	T	T	T	T	T	T	Y	Y	Y	T	T	Y	T	Y	T	T	T	Y	T	T	Y	Y	Y	T	Y	Y	T	T	Y	Y	Y	T	Y	Y	T	Y	T	T	Y	T	Y	Y
S1112_19722	G/A	1112	19722	+	NA	R	R	G	R	R	H	G	G	R	G	R	G	G	R	G	G	G	G	R	G	G	G	R	G	N	R	R	R	R	G	G	N	R	N	G	R	G	G	G	N	N	G	G	G
S1113_3316	T/A	1113	3316	+	NA	T	T	W	W	W	T	W	W	T	T	W	T	W	T	W	T	T	T	T	W	W	T	W	T	T	T	T	T	W	T	W	W	T	W	W	T	T	W	W	T	N	T	T	W
S1114_5332	T/C	1114	5332	+	NA	T	Y	T	Y	T	T	Y	Y	T	T	T	T	T	T	Y	Y	Y	Y	Y	Y	Y	T	T	Y	Y	Y	T	Y	Y	T	T	T	T	Y	T	T	T	T	T	T	T	Y	Y	T
S1118_10323	T/C	1118	10323	+	NA	T	T	T	Y	Y	Y	Y	T	Y	T	Y	Y	T	T	Y	T	Y	T	T	T	Y	T	Y	Y	Y	T	T	Y	T	T	Y	Y	Y	T	Y	Y	T	T	T	Y	T	T	T	Y
S1119_13304	T/G	1119	13304	+	NA	T	K	T	T	K	T	K	K	K	K	T	T	T	K	T	T	T	T	T	T	T	T	K	T	T	K	T	T	K	K	T	T	T	T	K	K	K	T	K	K	T	T	K	T
S1121_29154	C/T	1121	29154	+	NA	C	Y	C	C	C	Y	Y	C	Y	C	C	Y	C	C	Y	C	H	C	C	C	C	C	Y	Y	C	C	Y	C	C	C	C	C	C	C	Y	Y	Y	Y	C	C	C	Y	Y	C
S1122_9700	C/G	1122	9700	+	NA	C	C	S	C	C	C	C	S	C	S	C	S	S	C	C	C	C	C	C	S	C	C	S	C	C	C	S	C	S	C	S	S	S	C	H	C	C	S	C	N	C	C	C	S
S1124_12279	A/C	1124	12279	+	NA	A	A	A	A	M	A	A	M	M	A	A	A	M	M	A	M	A	A	A	M	A	A	M	A	A	M	M	A	M	M	A	A	A	A	M	A	M	A	M	M	A	A	M	A
S1134_19366	C/G	1134	19366	+	NA	C	C	C	S	S	S	C	C	C	S	S	S	C	C	C	S	S	C	C	C	S	C	S	C	S	S	C	S	C	C	S	C	C	C	S	S	C	C	C	H	C	H	C	S
S1138_21311	A/G	1138	21311	+	NA	R	R	A	R	A	A	A	A	A	A	R	R	A	A	A	A	A	A	A	A	A	A	R	A	R	R	R	R	A	A	R	A	R	A	A	R	A	A	A	A	H	A	A	A
S1139_32660	C/T	1139	32660	+	NA	C	C	Y	Y	C	Y	C	C	C	C	Y	Y	C	Y	C	Y	H	C	C	Y	Y	Y	C	C	C	Y	Y	Y	C	Y	Y	Y	Y	C	C	C	C	Y	C	N	C	Y	C	C
S1142_9426	A/C	1142	9426	+	NA	M	A	H	A	M	N	M	A	H	A	A	A	M	M	A	A	A	A	A	A	A	M	M	H	M	A	A	A	M	A	A	N	A	A	A	M	A	M	M	N	A	H	M	A
S1145_31476	G/A	1145	31476	+	NA	H	N	G	G	R	G	G	R	R	H	G	R	R	R	G	G	H	G	G	G	R	R	R	G	R	G	G	G	R	G	G	G	R	H	G	G	G	H	G	G	N	G	R	R
S1146_28060	T/G	1146	28060	+	NA	K	K	T	T	K	T	T	T	K	K	K	K	T	T	T	K	T	T	T	K	K	T	K	T	K	K	K	K	K	K	K	K	K	T	K	K	T	K	T	K	T	T	K	K
S1147_10653	T/A	1147	10653	+	NA	W	T	T	T	T	W	W	T	W	W	W	T	T	W	T	W	T	N	T	W	T	T	T	H	W	T	W	T	T	T	W	T	W	T	W	W	T	W	T	N	T	T	W	W
S1153_23008	G/T	1153	23008	+	NA	G	G	K	K	G	K	G	G	G	G	G	H	G	K	K	K	K	G	G	G	G	K	G	G	G	K	K	K	G	K	K	K	K	G	G	G	G	G	G	K	G	K	G	G
S1155_9530	T/G	1155	9530	+	NA	T	K	K	K	H	T	K	T	T	K	K	K	K	T	T	T	T	T	T	T	T	T	K	T	K	K	T	T	K	N	K	N	K	T	K	T	T	T	T	N	H	T	K	T
S1156_1264	A/G	1156	1264	+	NA	R	R	A	R	A	A	R	A	R	A	A	A	A	R	A	A	R	N	R	A	A	R	A	A	R	A	R	R	R	A	A	H	R	A	A	A	A	R	A	R	R	A	A	R
S1158_2684	G/A	1158	2684	+	NA	G	R	G	G	G	G	R	R	R	R	G	G	G	R	G	G	G	R	G	G	G	G	R	G	G	G	G	G	R	G	G	N	G	G	R	R	R	G	R	H	G	R	R	G
S1161_22026	T/C	1161	22026	+	NA	T	Y	Y	Y	Y	T	Y	T	T	T	Y	Y	Y	T	T	T	T	T	T	T	T	T	Y	T	Y	Y	T	T	T	T	Y	T	Y	T	Y	T	T	T	T	T	T	T	Y	T
S1162_5161	C/T	1162	5161	+	NA	C	Y	Y	Y	Y	C	Y	C	C	C	Y	Y	Y	C	C	C	C	C	C	C	C	C	Y	C	Y	Y	C	C	Y	C	Y	Y	Y	C	C	C	C	C	C	C	Y	C	Y	C
S1163_10732	T/C	1163	10732	+	NA	T	T	Y	Y	T	Y	Y	T	T	Y	T	Y	T	Y	Y	Y	Y	T	T	T	T	Y	T	T	T	H	T	Y	T	Y	Y	Y	Y	T	T	T	T	T	T	T	T	T	T	T
S1164_5983	A/C	1164	5983	+	NA	A	A	A	A	M	A	A	M	M	A	A	A	M	M	A	M	A	A	A	M	A	A	M	A	A	M	A	A	M	M	A	A	A	A	M	A	M	A	M	A	A	A	M	A
S1166_15340	G/C	1166	15340	+	NA	G	G	S	G	G	S	G	S	G	G	G	S	S	G	S	G	G	G	G	S	G	G	S	G	G	S	S	G	S	G	S	S	G	G	S	G	G	S	G	G	G	G	G	S
S1167_18127	T/C	1167	18127	+	NA	T	Y	T	T	T	Y	Y	T	Y	Y	T	H	Y	Y	T	T	Y	Y	Y	T	T	T	Y	Y	Y	Y	T	T	T	T	T	T	T	T	Y	Y	Y	Y	T	T	T	Y	T	T
S1168_31016	G/T	1168	31016	+	NA	G	K	G	G	K	H	K	H	G	G	K	G	K	G	K	K	K	N	K	K	K	G	G	K	K	G	K	G	K	G	G	H	G	K	G	G	G	G	G	N	N	K	K	K
S1169_30041	A/G	1169	30041	+	NA	A	A	H	R	A	N	R	A	A	R	R	R	R	R	N	R	R	A	A	R	R	R	A	A	R	A	A	A	R	R	A	R	A	A	A	A	A	R	A	H	N	A	A	A
S1172_491	T/A	1172	491	+	NA	T	W	T	T	W	W	W	W	W	W	W	T	W	T	W	W	W	W	W	T	W	T	T	T	W	T	W	W	W	T	T	W	W	T	T	T	W	T	T	W	W	W	W	W
S1174_7923	C/T	1174	7923	+	NA	Y	Y	C	Y	C	N	H	C	C	H	Y	C	Y	Y	H	Y	C	C	C	Y	C	Y	C	C	Y	Y	C	C	C	N	Y	N	C	C	C	C	C	Y	C	H	C	C	C	C
S1175_8533	A/T	1175	8533	+	NA	A	A	W	W	A	W	A	A	A	A	W	W	A	W	A	W	W	A	A	W	W	W	A	A	A	W	W	W	A	W	W	W	W	A	A	A	A	W	A	W	A	W	A	A
S1176_16940	C/A	1176	16940	+	NA	C	C	C	M	M	N	M	C	M	M	M	M	C	C	M	M	M	C	C	C	C	C	N	M	C	C	C	M	C	C	C	M	M	C	C	C	M	C	C	C	N	C	M	M
S1177_36569	T/C	1177	36569	+	NA	T	Y	T	Y	Y	T	Y	T	Y	Y	Y	T	T	T	Y	Y	Y	T	T	T	T	T	Y	Y	T	T	T	Y	T	T	T	Y	T	T	T	T	Y	T	T	T	T	T	Y	Y
S1179_19499	G/T	1179	19499	+	NA	G	K	G	G	G	G	K	K	K	K	G	G	G	K	G	G	G	G	K	G	G	G	K	G	G	G	G	G	K	K	G	G	G	G	K	K	K	G	K	H	G	G	K	G
S1180_9939	A/C	1180	9939	+	NA	A	A	M	M	A	A	A	M	A	A	A	M	M	A	M	A	A	A	A	M	A	A	M	A	A	M	M	A	M	A	M	M	A	A	M	A	A	M	M	A	A	A	A	H
S1183_18555	A/T	1183	18555	+	NA	A	A	A	A	W	A	A	W	W	A	A	A	W	W	A	W	A	A	A	W	A	A	W	A	A	W	W	A	W	W	A	A	A	A	W	A	W	A	W	W	A	A	W	A
S1184_16820	T/G	1184	16820	+	NA	T	T	T	K	K	K	K	T	K	K	K	T	T	T	K	K	K	T	T	T	T	T	K	K	T	T	T	K	T	T	T	K	K	T	T	K	K	T	T	T	T	T	K	K
S1188_5544	G/T	1188	5544	+	NA	G	G	G	G	K	G	K	K	K	K	G	G	G	K	G	G	G	G	G	K	G	G	K	G	G	K	G	G	K	K	G	G	G	G	K	K	K	G	K	K	G	G	K	G
S1189_7067	C/G	1189	7067	+	NA	S	C	S	S	C	S	S	C	C	S	S	C	C	C	C	C	C	S	S	C	C	S	C	C	N	C	S	S	C	C	C	C	S	C	C	C	S	S	C	N	H	C	S	S
S1191_3803	A/C	1191	3803	+	NA	A	A	A	M	M	M	M	A	M	M	M	M	A	A	M	A	M	M	A	A	M	A	M	M	M	A	A	M	A	A	M	M	M	A	M	M	A	A	A	M	A	A	A	M
S1195_27959	T/C	1195	27959	+	NA	Y	Y	T	Y	Y	Y	T	T	Y	T	Y	T	T	Y	T	T	T	H	Y	T	T	T	Y	T	Y	Y	Y	Y	Y	T	T	Y	Y	T	T	Y	T	T	T	T	Y	T	T	T
S1196_1446	C/G	1196	1446	+	NA	S	C	S	C	S	S	S	C	S	C	C	C	S	S	C	C	C	C	C	C	C	S	S	S	S	C	C	C	S	C	C	S	C	C	C	C	C	S	S	S	C	S	S	C
S1198_13840	A/C	1198	13840	+	NA	M	M	A	A	M	A	A	A	M	M	M	A	A	M	A	M	A	A	A	M	A	A	M	M	M	A	M	M	A	A	M	M	M	A	M	M	A	M	A	A	M	A	M	M
S1199_23713	C/A	1199	23713	+	NA	M	M	M	M	C	C	M	C	C	M	M	M	M	M	M	M	M	C	C	M	C	M	C	C	M	M	C	M	M	M	M	M	C	C	C	C	C	M	C	M	M	C	C	C
S1200_22798	G/A	1200	22798	+	NA	G	G	R	G	H	G	G	R	R	G	G	G	R	G	G	R	G	G	G	R	G	G	R	G	R	R	R	R	R	R	G	G	G	G	G	G	R	G	R	N	H	R	G	G
S1202_16065	G/A	1202	16065	+	NA	G	R	R	R	R	G	R	R	G	G	R	G	R	G	R	G	G	G	G	G	R	R	R	G	R	G	G	R	R	G	R	R	G	R	R	G	G	R	R	G	G	G	G	G
S1203_871	A/G	1203	871	+	NA	A	R	A	R	R	A	R	A	A	A	A	R	R	A	A	A	A	A	A	A	A	A	R	A	R	R	A	A	R	A	R	N	A	A	A	A	A	A	A	A	R	A	R	A
S1204_24052	T/G	1204	24052	+	NA	T	K	T	T	K	K	K	K	K	K	K	K	K	T	T	K	K	K	K	T	K	T	T	K	K	T	K	K	K	T	T	T	K	T	T	T	K	T	T	T	T	K	T	H
S1213_9641	A/G	1213	9641	+	NA	A	R	R	A	A	A	A	R	A	A	R	R	R	A	R	A	R	H	R	A	R	R	A	A	A	A	A	A	A	R	A	N	R	R	A	A	A	H	A	N	A	R	R	A
S1214_3879	C/T	1214	3879	+	NA	Y	C	C	C	Y	C	Y	C	Y	Y	C	Y	C	C	C	Y	C	C	C	C	Y	Y	C	C	Y	Y	Y	Y	Y	Y	C	Y	Y	C	C	C	C	Y	C	H	N	C	C	Y
S1215_13596	C/A	1215	13596	+	NA	C	M	C	C	C	C	C	C	C	C	M	M	C	C	M	C	M	M	M	C	M	C	C	C	C	M	C	C	C	C	C	M	M	C	C	C	C	M	C	C	C	M	C	C
S1217_9896	A/G	1217	9896	+	NA	R	R	R	R	A	R	R	A	R	R	R	A	A	A	A	A	A	R	R	A	A	R	A	A	R	A	R	R	A	A	A	R	R	A	A	A	R	R	A	R	A	A	R	R
S1218_20861	C/T	1218	20861	+	NA	C	Y	C	C	C	Y	Y	C	Y	Y	C	Y	Y	Y	Y	C	Y	Y	Y	C	C	C	Y	Y	C	Y	C	C	C	C	C	C	C	C	Y	Y	Y	Y	C	C	C	Y	Y	C
S1220_3489	A/G	1220	3489	+	NA	A	R	A	R	A	R	R	R	A	A	A	A	A	A	R	A	R	R	R	R	R	A	R	R	R	R	A	R	R	A	A	A	A	H	H	R	A	A	R	H	A	R	R	A
S1221_19587	C/A	1221	19587	+	NA	C	C	C	M	M	M	M	C	M	M	M	C	C	C	M	M	M	C	C	C	C	C	C	M	C	C	C	M	C	C	C	N	M	C	C	M	N	C	C	N	C	N	C	M
S1222_11023	C/G	1222	11023	+	NA	C	C	S	S	C	S	S	S	C	C	S	C	S	C	S	C	C	C	C	S	S	C	S	C	C	S	S	C	S	C	S	S	C	S	S	C	C	S	S	C	C	C	C	S
S1223_36825	A/C	1223	36825	+	NA	M	M	A	A	H	A	A	A	M	H	M	A	A	M	A	H	A	A	A	M	A	A	M	H	M	M	H	M	A	A	M	N	M	A	H	H	A	M	A	N	M	A	M	M
S1225_32178	A/C	1225	32178	+	NA	M	M	A	A	A	M	M	A	M	M	M	N	A	M	A	M	A	A	A	M	A	A	M	M	M	A	M	A	A	A	M	A	M	A	M	M	A	M	A	A	N	A	M	M
S1227_18884	C/G	1227	18884	+	NA	S	C	S	C	S	C	C	S	S	S	C	S	S	C	C	C	C	C	C	C	S	S	S	C	S	C	C	C	S	S	C	S	C	H	C	C	C	S	C	H	C	C	S	C
S1228_7238	A/G	1228	7238	+	NA	R	A	R	A	R	R	R	A	R	A	A	A	R	R	A	A	A	A	A	A	A	R	R	R	R	A	A	A	R	A	A	R	A	A	A	A	A	R	R	A	A	R	R	A
S1230_15417	A/C	1230	15417	+	NA	A	M	M	M	M	A	M	M	A	A	M	A	M	A	H	A	A	N	A	A	M	M	M	A	M	A	A	M	H	A	M	M	A	M	M	A	A	M	M	A	A	A	A	M
S1232_37910	A/C	1232	37910	+	NA	A	M	A	A	M	M	M	M	M	M	M	M	M	A	A	M	M	H	M	A	M	A	M	A	M	A	M	M	M	A	A	A	M	A	M	H	M	A	M	A	A	H	A	M
S1233_14418	T/A	1233	14418	+	NA	W	T	W	W	W	T	T	T	T	W	W	W	W	T	T	W	T	T	T	W	T	W	T	T	H	T	T	W	T	W	T	H	N	T	T	T	T	W	T	N	N	N	T	W
S1234_5415	C/G	1234	5415	+	NA	S	S	C	C	S	C	S	C	S	S	S	S	C	C	C	S	C	C	C	S	S	C	S	C	S	S	S	S	S	S	S	H	S	S	S	S	C	S	C	C	C	C	C	S
S1236_20163	C/T	1236	20163	+	NA	Y	Y	C	C	Y	C	C	C	Y	Y	Y	H	C	C	N	Y	C	C	C	Y	Y	C	Y	C	Y	Y	Y	Y	Y	Y	Y	Y	Y	C	Y	Y	C	Y	C	N	C	C	C	Y
S1237_29227	C/T	1237	29227	+	NA	Y	Y	C	C	Y	C	C	C	Y	Y	Y	C	C	Y	C	Y	C	C	C	Y	C	C	Y	Y	Y	C	Y	Y	Y	C	Y	H	Y	C	Y	Y	C	Y	C	N	H	C	Y	Y
S1240_7633	G/C	1240	7633	+	NA	G	G	S	S	S	G	S	S	G	G	S	G	S	G	S	G	G	G	G	G	S	S	S	G	S	G	G	S	S	G	S	S	G	S	S	G	G	S	S	G	G	G	G	G
S1242_6067	A/G	1242	6067	+	NA	A	A	A	A	R	A	A	R	R	A	A	A	A	R	A	R	A	A	A	R	A	A	R	A	A	R	A	A	R	R	A	A	A	A	R	A	R	A	R	R	A	A	R	A
S1249_303	C/G	1249	303	+	NA	S	C	S	S	S	C	S	C	C	S	S	S	S	C	C	S	C	C	C	S	C	S	C	C	S	S	C	S	S	S	C	N	S	C	C	C	C	S	C	N	H	H	C	S
S1250_21397	A/C	1250	21397	+	NA	M	M	A	A	A	M	M	A	M	M	M	A	A	A	A	M	A	A	A	M	A	A	M	M	M	A	M	A	A	A	M	A	A	A	M	M	A	M	A	A	M	A	M	M
S1251_16684	T/C	1251	16684	+	NA	Y	Y	Y	Y	T	Y	Y	T	T	Y	T	H	T	Y	Y	Y	T	T	T	T	T	Y	T	T	T	T	T	Y	T	Y	Y	Y	Y	T	T	T	T	T	T	T	Y	T	T	Y
S1253_12021	C/G	1253	12021	+	NA	C	C	S	S	C	S	S	C	C	S	C	S	C	S	S	S	S	C	C	C	C	S	C	C	C	S	C	S	C	C	C	C	S	C	C	C	C	C	C	S	S	C	C	S
S1254_8313	A/G	1254	8313	+	NA	R	R	A	A	R	A	A	A	R	R	R	R	A	A	A	R	A	A	A	R	R	A	R	A	R	R	R	R	R	R	R	R	R	A	R	R	A	R	A	R	A	A	R	R
S1260_19072	A/G	1260	19072	+	NA	R	R	A	R	R	A	A	A	R	A	R	R	A	R	A	A	A	R	R	A	A	A	R	A	R	R	R	R	R	A	R	H	R	A	A	R	A	A	A	N	R	A	R	A
S1262_3570	A/G	1262	3570	+	NA	A	A	R	R	R	R	R	R	A	A	R	A	R	A	N	A	A	A	A	R	R	A	R	A	A	A	A	A	R	A	R	R	A	R	R	A	A	R	R	N	A	A	A	R
S1265_5741	C/G	1265	5741	+	NA	C	S	C	C	C	C	S	C	S	S	C	S	C	S	C	C	S	S	S	C	C	C	C	S	C	S	C	C	C	C	C	C	S	C	C	C	S	S	C	C	C	S	C	C
S1267_11170	G/A	1267	11170	+	NA	G	R	R	R	R	G	R	R	G	G	R	G	R	G	R	G	G	G	G	R	R	R	R	G	R	G	G	G	R	G	R	R	G	R	R	G	G	R	R	G	G	G	G	R
S1268_7814	A/G	1268	7814	+	NA	R	R	R	R	A	N	R	A	H	R	R	R	A	A	A	A	H	R	R	A	A	R	A	A	R	R	R	R	A	A	A	R	A	A	A	A	R	R	A	R	N	A	R	R
S1269_23168	G/A	1269	23168	+	NA	R	G	R	G	R	G	G	R	R	R	G	R	R	R	G	G	G	G	G	G	R	R	R	G	R	G	G	G	R	R	G	R	R	R	G	G	G	R	G	R	R	G	R	R
S1271_248	T/C	1271	248	+	NA	T	T	Y	Y	T	Y	T	T	T	T	Y	Y	T	Y	T	Y	Y	T	T	Y	Y	Y	T	T	T	Y	Y	Y	T	T	Y	T	Y	T	T	T	T	Y	T	H	N	Y	T	T
S1272_2626	G/A	1272	2626	+	NA	G	G	R	R	G	R	G	G	G	G	R	R	G	R	G	R	R	G	G	R	R	R	G	G	G	R	R	R	G	R	R	G	G	G	G	G	G	R	G	R	G	R	G	G
S1273_26523	C/T	1273	26523	+	NA	Y	C	Y	C	Y	C	C	C	Y	Y	C	N	Y	Y	C	C	Y	C	C	C	Y	Y	N	C	Y	C	C	C	Y	H	C	Y	Y	Y	C	C	C	Y	C	N	N	C	Y	Y
S1274_17050	T/C	1274	17050	+	NA	T	T	Y	Y	T	Y	T	T	T	T	Y	H	T	Y	Y	Y	Y	T	T	T	T	Y	T	T	T	Y	Y	Y	T	Y	Y	T	Y	T	T	T	T	T	T	H	T	N	T	T
S1275_32670	C/T	1275	32670	+	NA	C	C	Y	Y	C	C	Y	C	C	Y	Y	Y	Y	Y	Y	Y	Y	C	C	Y	Y	Y	C	C	Y	Y	C	C	Y	Y	C	C	C	Y	C	C	C	Y	C	Y	C	C	C	C
S1276_6207	A/C	1276	6207	+	NA	M	A	M	A	M	M	M	M	M	A	A	A	M	M	A	A	A	A	A	A	M	M	M	M	M	A	A	A	M	A	A	M	A	M	A	A	A	M	M	M	M	A	M	A
S1276_60059	C/G	1276	60059	+	NA	H	S	S	C	H	H	S	S	C	S	S	C	S	S	C	S	C	C	C	C	S	S	S	H	S	C	S	C	S	C	S	C	S	S	S	C	C	S	S	N	S	C	S	C
S1278_9181	T/C	1278	9181	+	NA	T	T	T	Y	Y	Y	Y	T	Y	Y	Y	T	T	T	Y	Y	Y	T	T	T	T	T	Y	Y	T	T	T	Y	T	T	T	Y	Y	T	T	Y	Y	T	T	T	T	T	Y	Y
S1279_8349	A/T	1279	8349	+	NA	H	W	H	W	A	A	W	A	A	A	W	N	W	W	A	W	W	A	A	A	A	W	A	A	W	W	A	A	W	W	W	W	A	A	A	A	A	W	A	H	A	A	A	A
S1284_3226	C/T	1284	3226	+	NA	C	Y	C	C	Y	H	C	H	Y	N	Y	H	Y	C	N	Y	Y	N	Y	C	Y	C	Y	C	Y	C	Y	Y	Y	C	C	Y	Y	C	H	H	N	C	Y	N	C	Y	C	Y
S1285_10564	T/C	1285	10564	+	NA	T	Y	T	Y	T	H	Y	H	T	T	T	N	T	T	Y	Y	Y	Y	Y	Y	Y	T	T	Y	H	T	Y	Y	Y	T	T	T	T	T	T	T	T	T	T	T	T	Y	Y	T
S1286_9584	T/A	1286	9584	+	NA	T	T	W	T	T	W	T	W	T	W	T	W	W	T	T	T	T	T	T	W	T	T	W	T	T	T	W	T	W	T	W	W	W	T	H	T	T	W	T	T	T	T	T	W
S1288_3247	C/T	1288	3247	+	NA	Y	Y	C	C	Y	C	C	C	Y	Y	Y	Y	C	C	C	Y	C	C	C	Y	Y	C	Y	C	Y	Y	Y	Y	Y	Y	Y	C	Y	C	Y	Y	C	Y	C	N	C	C	Y	Y
S1289_13943	A/T	1289	13943	+	NA	A	W	A	A	A	W	W	A	W	W	A	H	W	W	W	A	H	W	W	A	A	A	H	W	A	W	W	A	A	A	A	A	A	A	W	W	H	W	A	A	N	W	W	A
S1290_11898	A/C	1290	11898	+	NA	A	M	M	H	M	A	M	M	A	A	H	A	A	A	A	M	A	M	M	A	M	A	A	M	M	A	M	M	M	A	A	A	A	A	A	A	A	A	A	A	A	N	M	H
S1291_22290	A/G	1291	22290	+	NA	A	R	A	A	R	R	R	R	R	R	R	R	R	A	A	R	R	R	R	A	R	A	R	R	R	A	R	R	R	A	A	R	R	A	R	H	R	A	R	A	A	R	A	R
S1292_10800	C/T	1292	10800	+	NA	Y	C	Y	C	Y	C	C	Y	Y	Y	C	Y	Y	Y	C	C	C	C	C	C	Y	Y	Y	C	Y	C	C	C	Y	Y	C	Y	C	Y	C	C	C	Y	C	N	C	C	Y	C
S1294_5795	T/G	1294	5795	+	NA	K	K	K	K	T	K	K	T	T	K	T	K	T	K	K	K	K	T	T	T	T	K	T	T	T	K	T	K	T	K	K	K	K	T	T	T	T	T	T	T	K	T	T	K
S1295_16578	G/A	1295	16578	+	NA	R	R	G	R	R	R	G	G	R	G	R	H	G	H	G	G	G	R	R	G	G	G	R	G	H	R	R	R	R	G	G	H	R	G	G	R	G	G	G	N	R	G	G	G
S1301_8837	A/C	1301	8837	+	NA	M	A	M	A	M	M	A	A	M	A	A	A	M	M	M	A	A	A	A	A	A	M	M	M	M	A	A	A	M	A	A	M	A	A	A	M	A	M	M	M	A	M	M	A
S1302_27308	A/C	1302	27308	+	NA	A	A	M	M	A	N	A	A	A	A	M	A	A	M	A	M	M	A	A	A	M	M	A	A	A	M	M	M	A	M	M	A	M	A	A	A	A	M	A	N	A	M	A	A
S1304_21007	C/T	1304	21007	+	NA	C	Y	C	C	C	C	Y	Y	Y	Y	C	C	C	Y	C	C	C	Y	Y	C	C	C	Y	C	C	C	C	C	Y	Y	C	C	C	C	Y	Y	Y	C	Y	Y	C	C	Y	C
S1305_26068	T/G	1305	26068	+	NA	K	K	T	K	K	K	T	T	K	T	K	K	T	K	T	T	T	K	K	T	T	T	K	T	K	K	K	K	K	T	T	K	K	T	K	K	T	T	T	N	K	H	T	T
S1308_4738	G/A	1308	4738	+	NA	G	G	G	R	R	N	R	G	R	G	R	G	G	G	R	G	H	G	G	G	R	G	R	R	G	G	G	R	G	G	G	N	R	G	G	R	G	G	G	N	N	G	G	R
S1314_28754	G/C	1314	28754	+	NA	S	S	S	S	G	G	S	G	G	S	S	S	S	S	S	S	S	G	G	S	G	S	G	G	S	S	G	S	S	S	S	S	G	G	G	G	G	S	G	S	S	G	G	S
S1316_16386	A/C	1316	16386	+	NA	A	M	A	A	A	M	M	M	M	M	M	M	M	A	A	M	M	M	M	A	A	A	A	M	M	A	M	M	M	A	A	M	M	A	A	A	M	A	A	N	A	A	M	M
S1323_42159	G/A	1323	42159	+	NA	R	R	G	G	R	G	G	G	R	R	R	R	G	G	G	R	G	G	G	R	R	G	R	G	R	R	R	R	R	R	R	R	R	G	R	R	G	R	G	R	G	G	G	R
S1324_9858	T/G	1324	9858	+	NA	K	K	K	K	K	H	T	T	K	T	H	T	T	K	T	T	T	H	K	T	T	T	T	T	K	K	K	K	K	T	T	H	K	T	T	K	T	T	T	T	T	N	T	T
S1328_10302	T/C	1328	10302	+	NA	T	Y	T	T	Y	H	Y	Y	Y	Y	Y	N	Y	T	T	Y	Y	T	Y	T	Y	T	T	Y	T	T	Y	Y	Y	T	T	H	Y	T	T	T	T	T	T	Y	T	T	Y	H
S1331_11616	G/T	1331	11616	+	NA	G	K	K	K	K	G	K	G	G	G	K	K	K	G	G	G	G	G	G	G	G	G	K	G	K	K	G	G	K	G	K	K	K	G	G	G	G	G	G	G	K	G	K	G
S1332_9835	G/A	1332	9835	+	NA	G	G	G	R	R	H	R	G	R	R	R	G	G	G	G	G	R	G	G	G	R	G	R	R	G	G	G	R	G	G	G	H	R	G	G	R	G	G	G	H	N	G	G	R
S1334_17180	G/A	1334	17180	+	NA	G	R	G	G	R	R	R	H	R	R	R	G	R	G	N	R	R	R	R	G	R	G	G	R	R	G	R	R	R	G	G	G	H	H	G	G	R	G	G	N	G	R	R	H
S1337_6879	A/G	1337	6879	+	NA	R	R	A	A	A	R	R	A	R	H	R	A	A	R	A	R	A	A	A	R	A	A	R	R	R	A	R	A	A	A	R	A	R	A	R	R	A	R	A	A	R	A	R	R
S1340_3375	C/T	1340	3375	+	NA	Y	Y	C	Y	Y	C	C	C	Y	C	Y	C	C	Y	C	C	C	Y	Y	C	C	C	C	C	Y	Y	Y	Y	Y	C	Y	N	Y	C	C	Y	C	C	C	C	N	C	Y	C
S1344_25082	T/C	1344	25082	+	NA	Y	T	Y	T	Y	T	T	Y	Y	Y	T	Y	Y	Y	T	T	Y	T	T	T	Y	Y	Y	T	Y	T	T	T	Y	Y	T	Y	Y	Y	T	T	T	T	T	Y	Y	T	Y	Y
S1345_17404	C/T	1345	17404	+	NA	C	C	C	Y	Y	C	Y	C	Y	Y	Y	C	C	C	Y	Y	Y	C	C	C	C	C	Y	Y	C	C	C	Y	C	C	C	Y	Y	C	C	Y	Y	C	C	C	C	C	Y	Y
S1349_14834	T/A	1349	14834	+	NA	W	W	W	W	T	W	W	T	T	W	T	W	T	W	W	W	W	T	T	T	T	W	T	T	T	W	T	W	T	W	W	W	W	T	T	T	T	T	T	W	W	T	T	W
S1350_7675	G/A	1350	7675	+	NA	R	R	G	G	G	R	G	G	H	R	R	G	G	R	G	H	G	N	G	R	G	G	R	R	R	G	R	G	G	G	N	G	R	G	R	R	G	R	G	G	H	G	R	R
S1352_37735	T/G	1352	37735	+	NA	T	T	T	T	K	T	T	K	K	T	T	T	K	K	T	K	T	T	T	K	T	T	K	T	T	K	T	T	K	K	T	T	T	T	K	T	H	T	K	T	T	T	K	T
S1353_14459	G/A	1353	14459	+	NA	G	R	G	G	G	G	G	G	R	R	G	R	G	R	R	G	R	R	R	G	G	G	G	R	G	R	G	G	G	G	G	N	R	N	G	G	R	R	G	N	G	R	G	G
S1354_24528	A/C	1354	24528	+	NA	A	M	A	A	A	M	A	A	A	A	M	M	A	A	A	A	M	M	M	A	M	A	A	A	A	A	A	A	A	M	A	M	M	M	A	A	A	M	A	A	A	M	A	A
S1355_8715	T/C	1355	8715	+	NA	Y	Y	T	T	Y	T	T	T	Y	Y	Y	Y	T	T	T	Y	T	T	T	Y	T	T	Y	T	Y	T	Y	Y	Y	T	Y	H	Y	T	Y	Y	T	Y	T	T	Y	T	Y	Y
S1356_6351	C/T	1356	6351	+	NA	C	Y	Y	Y	C	C	Y	C	C	Y	H	C	C	H	N	Y	Y	C	C	Y	Y	Y	C	C	H	Y	C	C	C	Y	Y	N	C	Y	C	C	N	Y	C	N	N	C	C	C
S1357_3621	G/T	1357	3621	+	NA	K	K	K	K	G	G	K	G	G	K	K	K	K	K	K	K	K	G	G	G	G	G	G	G	K	K	G	G	K	K	K	G	G	G	G	G	G	G	G	K	G	G	G	G
S1358_15281	C/T	1358	15281	+	NA	C	Y	C	C	Y	H	Y	H	C	H	Y	C	Y	C	Y	Y	Y	C	Y	Y	Y	C	C	Y	C	C	Y	Y	Y	C	C	N	C	Y	C	C	Y	C	C	C	C	Y	Y	C
S1359_29516	T/A	1359	29516	+	NA	W	W	T	T	W	T	T	T	W	W	W	W	T	T	T	W	T	T	T	W	T	T	W	T	W	T	W	W	W	T	W	W	W	T	W	W	T	W	T	T	W	T	W	W
S1361_19782	C/T	1361	19782	+	NA	C	Y	C	C	C	C	Y	Y	Y	Y	C	C	C	C	C	C	C	H	Y	C	C	C	Y	C	C	C	C	C	Y	Y	C	C	C	C	Y	Y	Y	C	Y	C	C	C	Y	C
S1363_16938	A/G	1363	16938	+	NA	R	A	H	A	R	A	A	R	R	R	A	R	R	R	A	A	A	A	A	A	R	R	R	A	R	A	A	A	R	R	A	A	A	A	A	A	A	R	A	R	N	A	R	A
S1364_10407	A/G	1364	10407	+	NA	A	R	A	R	R	A	R	A	A	A	R	R	R	A	A	A	A	A	A	A	A	A	R	A	R	R	A	A	R	A	R	R	R	A	A	A	A	A	A	A	R	A	R	A
S1365_37675	C/T	1365	37675	+	NA	Y	C	Y	Y	C	C	Y	C	C	Y	C	N	Y	Y	C	Y	C	C	C	Y	C	Y	C	C	Y	Y	C	Y	Y	Y	Y	N	C	C	C	C	C	Y	C	C	N	C	C	Y
S1367_6202	A/G	1367	6202	+	NA	A	R	R	R	H	R	R	R	A	A	R	A	R	A	N	A	A	A	A	R	R	R	R	A	A	A	A	A	R	A	R	R	A	H	R	A	A	R	R	N	A	A	A	R
S1369_14386	A/G	1369	14386	+	NA	R	R	R	R	R	R	R	A	R	R	R	R	A	A	A	A	R	R	R	A	A	R	A	A	R	R	R	R	A	A	R	R	A	A	A	A	R	R	A	R	A	A	R	R
S1370_18361	C/T	1370	18361	+	NA	Y	C	H	Y	C	C	Y	C	C	Y	Y	C	Y	Y	C	Y	C	C	C	Y	C	Y	C	C	Y	Y	C	Y	C	Y	C	H	C	C	C	C	C	Y	C	C	Y	Y	C	Y
S1379_2111	A/G	1379	2111	+	NA	R	R	A	A	A	R	A	A	R	R	R	A	A	R	A	R	A	A	A	R	A	A	R	R	R	A	R	A	A	A	R	A	R	A	R	R	A	R	A	A	R	A	R	R
S1384_15134	T/A	1384	15134	+	NA	W	T	T	T	W	T	W	T	W	T	T	W	T	T	T	W	T	T	T	T	W	W	T	T	W	W	W	W	W	W	T	H	W	T	T	T	T	W	T	T	T	T	T	W
S1385_15190	C/T	1385	15190	+	NA	C	Y	C	C	C	C	C	C	Y	Y	C	Y	C	Y	Y	C	Y	Y	Y	C	Y	C	C	Y	C	Y	C	C	C	C	C	C	Y	Y	C	C	Y	Y	C	C	C	H	C	C
S1386_10191	A/G	1386	10191	+	NA	A	A	R	R	R	R	A	A	A	A	A	A	R	R	R	A	A	A	A	A	A	R	R	R	R	A	A	A	R	A	R	R	A	A	R	R	A	R	R	R	A	R	R	A
S1387_24359	C/T	1387	24359	+	NA	Y	Y	Y	Y	C	C	Y	C	C	Y	Y	Y	Y	Y	C	Y	C	C	C	Y	C	Y	C	C	Y	Y	C	Y	Y	Y	Y	Y	C	C	C	C	C	Y	C	Y	Y	C	C	Y
S1391_38664	T/C	1391	38664	+	NA	Y	Y	Y	T	T	Y	Y	T	T	Y	T	Y	T	Y	Y	Y	Y	T	T	T	T	Y	T	T	T	T	T	Y	T	Y	T	Y	Y	T	T	T	T	T	T	Y	Y	T	T	Y
S1396_9738	T/C	1396	9738	+	NA	Y	T	Y	Y	Y	T	T	T	T	Y	Y	Y	Y	T	T	Y	T	T	T	Y	T	Y	T	T	Y	Y	T	Y	H	H	T	T	Y	T	T	T	T	Y	T	Y	Y	Y	T	Y
S1397_13394	A/T	1397	13394	+	NA	A	W	A	A	W	A	W	W	W	H	A	A	A	W	A	A	A	A	A	A	A	A	W	A	A	W	A	A	W	W	A	A	A	A	W	W	W	A	W	W	A	A	W	A
S1398_1010	A/T	1398	1010	+	NA	W	W	A	W	A	A	W	A	W	W	W	A	A	W	A	A	A	H	H	A	A	W	A	A	W	A	W	W	W	A	A	A	W	A	A	A	W	W	A	N	N	A	W	W
S1399_2877	C/A	1399	2877	+	NA	M	M	C	C	C	M	M	C	M	M	M	C	C	M	C	M	C	C	C	M	C	C	C	C	C	C	M	C	C	C	M	N	M	C	M	C	C	M	C	C	C	C	C	M
S1400_1079	G/T	1400	1079	+	NA	K	K	G	K	K	G	G	G	K	G	K	K	G	K	G	G	G	H	K	G	G	G	K	G	K	K	K	K	K	G	G	K	K	G	G	K	G	G	G	G	G	G	G	G
S1401_5292	T/G	1401	5292	+	NA	T	K	T	T	T	T	K	T	K	K	T	K	T	K	K	T	K	K	K	T	T	T	T	K	T	K	T	T	T	T	T	T	T	T	T	T	K	K	T	T	T	K	T	T
S1404_8585	T/C	1404	8585	+	NA	T	Y	T	Y	Y	Y	Y	Y	T	T	Y	T	T	T	Y	Y	Y	H	Y	Y	Y	T	T	Y	Y	T	Y	Y	H	T	T	T	T	Y	T	T	T	T	T	Y	N	H	Y	Y
S1406_15386	C/A	1406	15386	+	NA	C	M	C	C	M	M	M	C	C	M	M	C	M	C	M	M	M	M	M	M	M	C	C	M	M	C	M	M	M	C	C	C	C	M	C	C	C	C	C	H	C	C	M	M
S1410_14795	G/A	1410	14795	+	NA	R	G	R	G	R	G	G	G	R	G	G	G	R	R	G	G	R	G	G	G	R	R	R	G	R	G	G	G	H	R	G	N	R	R	G	G	G	H	G	H	N	G	R	R
S1411_19844	C/T	1411	19844	+	NA	C	Y	Y	Y	Y	C	Y	C	C	Y	Y	C	Y	C	C	C	C	C	C	C	C	C	Y	C	Y	Y	C	C	C	C	Y	Y	Y	C	Y	C	C	C	C	C	H	C	Y	C
S1413_17054	A/C	1413	17054	+	NA	A	A	M	M	A	M	M	A	A	M	A	M	A	M	M	M	M	A	A	A	A	M	A	A	A	M	A	M	A	M	M	M	M	A	A	A	A	A	A	M	M	A	A	A
S1415_3269	C/T	1415	3269	+	NA	C	C	Y	Y	C	Y	C	C	C	C	Y	Y	C	Y	C	Y	Y	C	C	C	Y	Y	C	C	C	Y	Y	Y	C	Y	Y	Y	Y	C	C	C	C	Y	C	C	C	Y	C	C
S1416_3112	G/C	1416	3112	+	NA	S	G	G	G	S	G	H	G	S	S	G	S	G	G	G	S	G	G	G	G	S	S	G	G	S	S	S	S	H	S	G	H	S	G	G	G	G	S	G	N	G	G	G	S
S1417_4244	T/C	1417	4244	+	NA	Y	Y	Y	Y	T	T	Y	T	T	Y	Y	Y	Y	Y	Y	Y	Y	T	T	Y	T	Y	T	T	Y	Y	T	Y	Y	Y	Y	Y	T	T	T	T	T	Y	T	Y	Y	T	T	T
S1419_37402	T/C	1419	37402	+	NA	Y	Y	Y	Y	T	T	Y	T	T	Y	Y	Y	Y	Y	Y	Y	Y	T	T	Y	T	Y	T	T	Y	Y	T	Y	Y	Y	Y	Y	T	T	T	T	T	Y	T	Y	Y	T	T	Y
S1420_29803	G/A	1420	29803	+	NA	R	G	G	R	R	G	G	G	G	R	R	R	R	G	G	R	G	G	G	R	G	R	G	G	R	R	G	R	R	R	G	H	R	G	G	G	G	R	G	G	R	R	G	R
S1421_12759	G/T	1421	12759	+	NA	G	K	G	G	G	G	K	K	K	K	G	G	G	K	G	G	G	H	K	G	G	G	K	G	G	G	G	G	K	K	G	G	G	G	K	K	K	G	K	K	G	G	K	G
S1422_14650	G/A	1422	14650	+	NA	G	R	G	G	G	G	R	R	H	H	G	G	G	G	G	G	N	R	R	G	G	G	R	G	G	G	G	G	R	H	G	G	G	G	R	G	R	G	R	G	G	G	R	G
S1423_27966	T/A	1423	27966	+	NA	T	T	T	W	W	W	T	T	W	W	W	T	T	T	W	T	W	T	T	T	W	T	W	W	T	T	T	W	T	T	T	W	W	T	T	W	T	T	T	W	T	T	W	W
S1425_19951	C/T	1425	19951	+	NA	C	Y	C	C	Y	Y	Y	Y	Y	Y	Y	C	Y	C	Y	Y	Y	Y	Y	C	Y	C	C	Y	Y	C	Y	Y	Y	C	C	C	Y	Y	C	C	Y	C	C	Y	C	Y	Y	Y
S1426_5376	G/A	1426	5376	+	NA	G	R	G	G	G	G	G	G	R	R	G	R	G	R	H	G	G	R	R	G	R	G	G	R	G	R	G	G	G	G	G	G	R	R	G	G	H	R	G	G	G	R	G	G
S1428_15431	A/G	1428	15431	+	NA	R	R	R	R	A	R	R	A	R	R	R	R	A	A	A	A	R	R	R	A	A	R	A	A	R	R	R	R	A	A	A	N	A	A	A	A	R	R	A	A	A	A	R	R
S1429_14882	C/T	1429	14882	+	NA	Y	C	C	C	Y	N	C	Y	Y	C	C	C	Y	Y	N	C	C	N	C	C	Y	Y	Y	Y	Y	C	C	C	H	C	C	H	C	Y	C	C	C	Y	Y	N	N	C	Y	C
S1430_35534	C/T	1430	35534	+	NA	C	C	Y	Y	C	Y	C	C	C	C	C	Y	C	Y	Y	Y	Y	C	C	C	C	Y	C	C	C	Y	C	Y	C	Y	Y	Y	Y	C	C	C	C	C	C	C	C	C	C	C
S1431_10411	A/G	1431	10411	+	NA	R	R	A	R	R	R	A	A	R	A	R	R	A	R	A	A	A	R	R	A	A	A	R	A	R	R	R	R	R	A	A	R	R	A	A	R	A	A	A	A	R	A	A	A
S1433_6571	C/T	1433	6571	+	NA	C	C	Y	Y	C	Y	C	C	C	C	C	Y	C	Y	Y	Y	Y	C	C	C	C	Y	C	C	C	Y	Y	Y	C	Y	Y	Y	Y	C	C	C	C	C	C	Y	C	Y	C	C
S1438_366	T/C	1438	366	+	NA	Y	T	Y	Y	Y	T	Y	T	T	Y	Y	Y	Y	T	T	Y	T	T	T	Y	T	Y	T	T	Y	Y	T	Y	Y	Y	T	Y	Y	T	T	T	T	Y	T	Y	Y	Y	T	Y
S1446_12568	G/T	1446	12568	+	NA	K	K	K	K	G	H	K	G	G	K	G	G	G	K	K	G	K	G	G	G	G	K	G	G	G	G	G	K	G	K	H	H	K	G	G	G	G	G	G	K	K	G	G	K
S1447_19218	A/G	1447	19218	+	NA	R	R	R	R	A	A	R	A	A	R	R	R	R	R	R	R	R	A	A	R	A	R	A	A	R	R	A	R	R	R	R	R	A	A	A	A	A	R	A	R	R	A	A	A
S1452_16131	G/A	1452	16131	+	NA	R	R	R	R	G	R	R	G	R	R	R	G	G	G	G	G	N	H	R	G	G	R	G	G	R	G	R	R	G	G	G	G	R	G	G	G	R	R	G	R	N	G	R	R
S1456_10718	C/T	1456	10718	+	NA	C	C	C	C	Y	C	Y	Y	C	Y	C	C	C	Y	C	C	C	C	C	C	C	C	Y	C	C	C	C	C	Y	Y	C	C	C	C	Y	Y	Y	C	Y	C	C	C	Y	C
S1462_1549	C/G	1462	1549	+	NA	C	S	C	C	S	S	S	C	S	S	S	C	S	C	S	S	S	S	S	C	S	C	C	S	S	C	S	S	S	C	C	S	S	S	C	C	C	C	C	C	C	S	S	S
S1465_23132	T/A	1465	23132	+	NA	T	T	T	W	W	W	W	T	W	W	W	T	T	T	N	T	W	T	T	T	W	T	W	W	T	T	T	W	T	T	T	W	W	T	T	W	T	T	T	W	T	T	T	W
S1467_10387	T/C	1467	10387	+	NA	T	T	T	Y	Y	Y	T	T	Y	Y	Y	Y	T	T	Y	T	Y	T	T	T	Y	T	Y	Y	T	T	T	Y	T	T	T	Y	Y	T	T	Y	T	T	T	Y	T	T	T	Y
S1468_21494	A/G	1468	21494	+	NA	A	A	A	R	R	A	A	A	H	H	R	R	A	A	H	A	R	A	A	A	R	A	H	R	A	A	A	R	A	A	A	H	R	A	A	R	A	A	A	H	A	A	R	R
S1475_10418	A/C	1475	10418	+	NA	M	A	M	A	M	M	M	M	M	A	A	A	M	M	A	A	A	A	A	A	M	M	M	M	M	A	A	A	M	A	A	M	A	M	A	A	A	M	M	N	M	A	M	A
S1477_47954	T/C	1477	47954	+	NA	Y	Y	T	T	Y	T	Y	T	Y	Y	Y	Y	T	T	T	Y	T	T	T	Y	Y	T	T	T	Y	Y	Y	Y	Y	Y	Y	H	Y	T	T	T	T	Y	T	T	T	T	T	Y
S1478_3879	A/G	1478	3879	+	NA	A	A	R	A	A	R	R	A	A	H	R	R	R	R	A	R	H	A	A	R	R	R	A	A	H	A	A	A	R	R	A	R	A	N	A	A	A	H	A	R	A	A	A	A
S1479_30452	G/A	1479	30452	+	NA	G	G	G	R	R	R	R	G	R	R	R	G	G	G	R	R	R	G	G	G	G	G	R	R	G	G	G	R	G	G	G	R	R	G	G	R	R	G	G	G	G	G	R	R
S1481_19760	G/C	1481	19760	+	NA	G	S	G	G	S	S	S	S	S	G	S	G	S	G	S	S	S	H	S	G	S	G	G	S	G	G	S	S	S	G	G	S	S	S	G	G	S	G	G	G	G	G	S	S
S1485_10991	C/T	1485	10991	+	NA	C	C	C	Y	Y	Y	C	C	Y	Y	Y	C	C	C	Y	C	Y	C	C	C	Y	C	Y	Y	C	C	C	Y	C	C	C	Y	Y	C	C	Y	C	C	C	Y	C	C	C	Y
S1489_12407	A/G	1489	12407	+	NA	A	R	A	A	R	R	R	R	R	R	R	R	R	A	A	R	R	R	R	A	R	A	A	R	R	A	R	R	R	A	A	R	R	A	A	A	R	A	A	R	A	R	R	R
S1490_7597	T/A	1490	7597	+	NA	T	W	T	T	T	T	W	W	W	W	T	T	T	W	T	T	T	W	W	T	T	T	W	T	T	T	T	T	W	W	T	T	T	T	W	W	W	T	W	W	T	T	W	T
S1492_23162	C/T	1492	23162	+	NA	Y	Y	Y	Y	C	Y	Y	C	Y	Y	Y	Y	C	C	C	C	Y	Y	Y	C	C	Y	C	C	Y	Y	Y	Y	C	C	C	Y	C	C	C	C	Y	Y	C	H	C	C	Y	Y
S1493_16810	T/A	1493	16810	+	NA	T	W	T	T	T	N	T	T	W	H	T	W	T	W	H	T	W	H	W	T	T	T	T	W	T	W	T	T	T	T	T	N	T	T	T	T	W	W	T	T	N	W	T	T
S1496_2811	G/C	1496	2811	+	NA	G	G	G	S	S	S	G	G	G	G	G	G	S	S	S	G	G	G	G	G	G	S	S	S	S	G	G	G	G	G	S	S	G	G	S	S	G	S	S	G	G	S	S	G
S1497_8811	G/T	1497	8811	+	NA	G	K	K	K	G	G	K	G	G	G	K	G	K	G	G	G	G	G	G	G	G	G	K	G	N	K	G	G	G	G	K	K	K	G	G	G	G	G	G	G	G	G	G	G
S1498_8181	G/A	1498	8181	+	NA	R	G	R	G	R	G	G	R	R	R	G	R	R	R	G	G	R	G	G	G	R	R	R	G	G	G	G	G	R	R	G	N	R	R	G	G	G	G	G	N	N	G	R	R
S1502_16452	A/C	1502	16452	+	NA	M	M	A	M	A	A	A	A	M	M	A	M	A	A	M	M	M	M	M	M	A	M	A	A	M	A	M	M	A	A	M	M	M	M	M	A	M	A	M	H	A	M	M	M
S1503_1599	C/A	1503	1599	+	NA	M	M	C	M	C	C	M	C	M	C	C	C	C	M	C	C	M	M	M	C	C	M	C	C	M	C	M	M	M	C	C	M	M	C	C	C	M	M	C	C	M	C	C	C
S1506_2077	A/G	1506	2077	+	NA	R	R	A	R	R	A	A	A	R	A	R	A	A	R	N	A	A	R	R	A	A	A	R	A	R	R	R	R	A	A	N	A	R	A	A	H	A	A	N	A	A	A	H	A
S1507_8584	T/A	1507	8584	+	NA	T	T	W	W	T	W	T	W	T	T	W	W	W	T	W	T	T	T	T	W	T	T	W	T	T	W	W	T	W	T	W	H	T	T	W	T	T	W	W	T	T	T	T	W
S1508_14651	C/G	1508	14651	+	NA	C	C	S	S	C	S	S	S	C	C	S	C	S	C	S	C	C	C	C	S	S	C	S	C	C	C	C	C	S	C	S	S	C	S	S	C	C	S	S	C	C	C	C	S
S1509_698	A/G	1509	698	+	NA	A	A	A	R	R	R	A	A	A	R	R	R	A	A	H	R	H	A	A	A	R	A	R	A	R	R	A	R	A	A	R	A	R	A	R	R	A	A	A	A	A	A	A	R
S1509_50894	G/T	1509	50894	+	NA	G	G	G	K	K	H	G	G	G	K	K	K	G	G	G	K	K	G	G	G	K	G	K	G	K	K	G	K	G	G	H	K	K	G	K	K	G	G	G	N	N	G	G	K
S1510_10003	C/G	1510	10003	+	NA	C	C	C	S	S	S	S	C	S	S	S	S	C	C	S	C	S	C	C	C	S	C	S	H	S	C	C	S	C	C	S	C	S	C	S	S	C	C	C	N	N	C	C	S
S1514_1757	G/C	1514	1757	+	NA	S	S	S	S	G	G	S	G	G	S	S	S	S	S	S	S	S	G	G	S	G	S	G	G	S	S	G	S	S	S	S	S	G	G	G	G	G	S	G	S	G	G	G	G
S1519_11743	T/C	1519	11743	+	NA	Y	T	T	T	Y	T	T	T	Y	Y	Y	Y	T	T	T	Y	T	T	T	T	Y	Y	T	T	Y	T	Y	Y	Y	Y	T	H	Y	T	T	T	T	Y	T	N	N	T	T	Y
S1522_1230	A/G	1522	1230	+	NA	A	A	R	R	A	R	R	A	A	R	A	R	A	R	A	R	R	A	A	A	A	A	A	A	A	R	A	R	A	H	R	A	R	A	A	A	A	A	A	R	A	A	A	A
S1523_14417	T/C	1523	14417	+	NA	T	T	T	Y	Y	Y	T	T	T	T	Y	Y	T	T	T	Y	Y	T	T	T	Y	T	Y	T	Y	Y	T	Y	T	T	Y	T	T	T	Y	Y	T	T	T	T	T	Y	T	Y
S1524_22550	A/G	1524	22550	+	NA	R	R	R	R	A	A	R	A	A	R	R	R	R	R	A	R	A	A	A	R	A	R	A	A	R	R	A	R	R	R	R	R	A	A	A	A	A	R	A	R	R	A	A	R
S1525_11312	G/C	1525	11312	+	NA	S	S	G	G	S	G	G	G	H	S	S	G	G	G	G	S	G	G	G	S	G	G	S	G	S	S	S	S	S	S	S	G	S	G	H	S	G	S	G	S	G	G	S	S
S1526_5660	A/T	1526	5660	+	NA	A	A	A	W	W	A	W	A	W	W	W	A	A	A	W	A	H	A	A	A	W	A	W	W	A	A	A	W	A	A	A	A	W	A	A	W	A	A	A	W	A	A	A	W
S1527_7563	G/A	1527	7563	+	NA	R	G	R	R	G	G	R	G	G	R	R	R	R	R	G	R	G	G	G	R	G	R	G	G	G	R	G	R	R	R	G	R	R	G	G	G	G	R	G	N	N	R	G	R
S1528_14638	A/G	1528	14638	+	NA	A	R	R	R	R	A	R	R	A	A	R	A	R	A	R	A	A	A	A	R	R	R	R	A	R	A	A	A	R	A	R	R	A	R	R	A	A	R	R	A	A	A	A	R
S1529_20309	C/A	1529	20309	+	NA	C	C	C	M	C	M	C	N	N	M	M	C	C	C	M	M	M	C	C	C	M	C	M	C	M	M	C	M	C	C	C	H	H	C	M	M	N	C	C	N	C	C	C	M
S1533_5262	A/G	1533	5262	+	NA	A	R	A	A	A	A	A	A	A	A	R	R	A	A	R	A	R	R	R	A	R	A	A	A	A	A	A	A	A	A	A	R	R	R	A	A	A	R	A	A	A	R	A	A
S1534_10859	C/G	1534	10859	+	NA	C	C	S	S	S	S	C	C	S	C	C	C	S	S	C	C	C	C	C	C	C	S	S	S	S	C	C	C	S	C	C	N	C	C	S	S	C	S	S	C	C	H	S	C
S1536_15649	A/G	1536	15649	+	NA	R	A	R	A	R	R	R	R	R	A	A	A	R	R	A	A	A	A	A	A	R	R	R	R	R	A	A	A	R	R	A	R	A	R	A	A	A	R	R	R	R	A	R	A
S1542_11060	C/T	1542	11060	+	NA	C	Y	C	C	C	Y	C	C	C	C	Y	Y	C	C	C	C	Y	Y	Y	C	Y	C	C	C	C	C	C	C	C	C	C	Y	Y	Y	C	C	C	Y	C	C	C	Y	C	C
S1550_17529	G/A	1550	17529	+	NA	G	R	R	R	R	G	R	R	G	G	R	G	R	G	R	G	G	G	G	R	R	R	R	G	G	G	G	G	R	G	R	R	G	R	R	G	G	R	R	G	G	G	G	R
S1552_55458	T/C	1552	55458	+	NA	T	Y	Y	Y	T	T	N	T	T	T	Y	H	Y	T	T	T	T	T	T	T	T	T	Y	T	Y	Y	T	T	Y	T	Y	Y	Y	T	Y	Y	T	T	T	N	N	T	T	T
S1553_10335	A/G	1553	10335	+	NA	A	A	A	A	R	A	R	R	R	R	A	N	A	R	A	A	A	A	A	R	A	A	R	A	A	R	A	A	H	R	A	A	A	A	R	R	A	A	R	A	A	A	R	A
S1556_21033	C/T	1556	21033	+	NA	C	Y	C	C	Y	Y	Y	Y	Y	Y	Y	Y	Y	C	C	Y	Y	Y	Y	C	Y	C	C	Y	Y	C	Y	Y	Y	C	C	Y	Y	C	C	C	Y	C	C	Y	C	Y	C	Y
S1557_4738	C/T	1557	4738	+	NA	C	Y	C	C	Y	C	Y	Y	Y	Y	C	C	C	H	C	C	C	C	C	C	C	C	Y	C	C	Y	C	C	Y	Y	C	C	C	C	Y	Y	Y	C	Y	H	N	C	C	C
S1558_14444	C/T	1558	14444	+	NA	C	Y	Y	Y	Y	C	Y	C	C	C	Y	Y	Y	C	C	C	C	C	C	C	C	C	Y	C	Y	Y	C	C	Y	C	Y	Y	Y	C	Y	C	C	C	C	C	Y	C	Y	C
S1563_7958	G/A	1563	7958	+	NA	G	R	H	R	R	G	R	G	G	G	R	G	R	G	G	G	G	G	G	G	G	G	R	G	R	R	G	G	R	G	R	N	R	G	R	G	G	G	G	N	H	G	R	G
S1565_271	A/T	1565	271	+	NA	A	W	W	W	W	A	W	A	A	A	W	A	W	A	W	A	A	A	A	A	W	W	W	A	W	A	A	A	W	A	W	W	A	W	W	A	A	W	W	A	A	A	A	W
S1567_7479	C/T	1567	7479	+	NA	C	Y	C	C	C	C	C	C	C	Y	Y	Y	C	C	Y	C	C	Y	Y	C	Y	C	C	C	C	Y	C	C	C	C	C	N	Y	C	C	C	C	Y	C	N	C	Y	C	C
S1568_10990	T/A	1568	10990	+	NA	W	T	W	T	W	T	T	H	W	W	T	W	W	H	T	T	T	T	T	T	W	W	H	T	H	T	T	T	W	T	T	W	T	W	T	T	T	W	T	N	T	T	W	T
S1569_14436	G/A	1569	14436	+	NA	G	R	G	G	G	G	G	G	G	R	R	R	G	G	R	G	R	R	R	G	R	G	G	G	G	R	G	G	G	G	G	R	R	R	G	G	G	R	G	G	G	R	G	G
S1570_3571	A/C	1570	3571	+	NA	A	M	A	A	A	M	M	A	H	A	A	M	M	M	M	A	H	A	A	A	A	A	M	M	A	M	M	A	A	A	A	A	A	A	M	M	M	M	A	A	A	M	M	A
S1573_15079	G/C	1573	15079	+	NA	G	G	S	S	G	S	G	G	G	G	G	S	G	S	S	S	S	G	G	G	G	S	G	G	G	S	S	S	G	S	S	S	S	G	G	G	G	G	G	G	G	S	G	G
S1574_17105	A/T	1574	17105	+	NA	A	W	A	A	A	W	W	A	W	W	A	W	W	W	W	A	W	W	W	A	A	A	W	W	A	W	A	A	A	A	A	A	A	A	W	W	W	W	A	A	A	W	W	A
S1586_14058	T/A	1586	14058	+	NA	W	T	W	T	W	T	T	W	W	W	T	W	W	W	T	T	W	T	T	T	W	W	W	T	H	T	T	T	W	W	T	W	W	W	T	T	T	W	T	T	N	T	W	W
S1590_2776	G/T	1590	2776	+	NA	G	G	K	K	G	K	G	G	G	G	K	K	G	K	K	K	K	G	G	G	G	K	G	G	G	K	K	K	G	K	K	K	K	G	G	G	G	K	G	H	G	K	G	G
S1590_57649	A/G	1590	57649	+	NA	A	A	R	R	A	R	A	A	A	A	R	R	A	R	R	R	R	A	A	A	A	R	A	A	A	R	R	R	A	R	R	A	R	A	A	A	A	R	A	R	A	H	A	A
S1592_3196	G/T	1592	3196	+	NA	G	G	G	G	K	G	K	K	K	K	G	G	G	K	G	G	G	G	G	K	G	G	K	G	G	K	G	G	K	K	G	G	G	G	K	K	K	G	K	H	G	G	K	G
S1593_1750	A/G	1593	1750	+	NA	A	A	R	A	R	A	A	R	R	A	A	A	R	R	A	R	A	A	A	R	A	A	R	A	R	R	R	R	R	R	A	A	A	A	A	A	R	A	R	R	R	R	A	A
S1594_1001	C/T	1594	1001	+	NA	Y	C	H	C	Y	Y	Y	Y	Y	C	C	C	Y	Y	N	C	C	C	C	C	Y	Y	Y	Y	Y	C	C	C	Y	Y	C	H	C	C	C	C	C	Y	Y	N	H	C	Y	C
S1603_20448	G/A	1603	20448	+	NA	G	R	G	G	R	G	R	G	G	H	R	G	R	G	G	R	H	R	R	R	R	G	G	R	R	G	R	R	R	G	G	R	G	G	G	G	G	G	G	G	N	G	R	R
S1604_10723	T/C	1604	10723	+	NA	Y	Y	Y	Y	T	Y	Y	T	Y	Y	Y	H	T	T	T	T	Y	N	Y	T	T	Y	T	T	Y	Y	Y	Y	T	T	N	Y	T	T	T	T	Y	Y	T	N	N	T	Y	Y
S1605_13071	C/T	1605	13071	+	NA	Y	Y	Y	Y	C	C	Y	C	C	Y	Y	Y	Y	Y	C	Y	N	C	C	Y	C	Y	C	C	H	C	C	Y	Y	H	H	Y	C	C	C	C	C	H	C	N	Y	C	C	Y
S1606_14817	A/C	1606	14817	+	NA	A	M	A	A	M	M	M	M	A	A	M	A	M	A	M	M	M	M	M	M	M	A	A	M	M	A	M	M	M	A	A	A	A	M	A	A	A	A	A	M	A	M	M	M
S1612_3367	G/A	1612	3367	+	NA	R	G	R	R	R	G	G	G	G	R	R	R	R	G	G	R	G	G	G	R	G	R	G	G	R	R	G	R	R	R	G	R	R	G	G	G	G	R	G	R	R	R	G	R
S1613_14289	G/A	1613	14289	+	NA	G	G	R	G	G	G	G	R	G	G	G	R	R	G	R	G	G	G	G	G	G	G	R	G	G	R	R	G	G	G	R	G	G	G	R	G	G	R	G	G	G	G	G	G
S1614_2846	T/A	1614	2846	+	NA	T	W	T	T	T	T	W	W	W	H	T	T	T	W	T	T	T	W	W	T	T	T	W	T	T	T	T	T	W	T	T	T	T	T	H	W	W	T	W	T	T	W	W	T
S1615_8270	T/C	1615	8270	+	NA	T	Y	T	T	Y	T	Y	T	T	T	Y	T	Y	T	Y	Y	Y	Y	Y	Y	Y	T	T	Y	Y	T	Y	Y	Y	T	T	H	T	Y	T	T	T	T	T	T	T	T	Y	Y
S1616_7797	T/C	1616	7797	+	NA	Y	Y	Y	Y	T	H	Y	T	T	H	Y	Y	Y	Y	T	Y	Y	T	T	Y	Y	Y	T	T	Y	Y	T	T	Y	Y	H	Y	T	Y	T	T	T	Y	T	Y	T	T	T	T
S1617_7569	C/T	1617	7569	+	NA	Y	Y	Y	Y	C	Y	Y	C	Y	Y	Y	C	C	C	C	C	C	H	H	C	C	Y	C	C	C	C	Y	Y	N	C	C	N	Y	C	C	C	Y	Y	C	N	C	C	Y	Y
S1618_3820	G/T	1618	3820	+	NA	K	K	G	K	K	G	G	G	K	G	K	K	G	K	G	G	G	K	K	G	G	G	K	G	K	K	K	K	K	G	G	K	K	G	G	K	G	G	G	G	K	G	G	G
S1620_3729	A/C	1620	3729	+	NA	A	A	H	M	M	A	A	A	A	M	M	A	M	A	A	A	A	A	A	A	A	A	M	A	M	M	A	A	M	A	M	A	M	A	H	A	A	A	A	A	A	A	M	A
S1627_20170	T/A	1627	20170	+	NA	T	W	T	T	T	N	W	W	W	W	T	T	T	T	T	T	T	W	W	T	T	T	W	T	T	T	T	T	W	W	T	T	T	T	W	W	H	T	W	N	T	T	W	T
S1628_16076	T/C	1628	16076	+	NA	Y	Y	Y	Y	T	T	Y	T	T	Y	Y	Y	Y	Y	Y	Y	Y	T	T	Y	T	Y	T	T	Y	Y	T	T	Y	Y	Y	T	T	T	T	T	T	Y	T	Y	T	T	T	T
S1629_38316	A/G	1629	38316	+	NA	R	R	H	R	A	R	R	A	A	R	A	H	A	R	R	R	R	A	A	A	A	R	A	A	A	A	A	R	A	R	R	R	R	A	A	A	A	A	A	N	A	A	A	R
S1630_3448	T/C	1630	3448	+	NA	T	Y	Y	Y	Y	Y	Y	Y	T	T	Y	T	Y	T	Y	T	T	T	T	Y	Y	Y	Y	T	T	T	T	T	Y	T	Y	Y	T	Y	Y	T	T	Y	Y	T	T	T	T	Y
S1631_2498	C/A	1631	2498	+	NA	C	M	C	C	M	C	C	H	M	C	M	H	M	C	M	M	M	M	M	C	M	C	C	M	M	C	M	M	M	C	N	N	M	C	C	C	C	C	C	N	N	H	M	C
S1636_4090	G/A	1636	4090	+	NA	G	R	G	G	R	R	R	R	R	R	R	R	R	G	G	R	R	R	R	G	R	G	G	R	R	G	R	R	R	G	G	R	R	G	G	G	R	G	G	R	G	R	R	R
S1637_3430	C/T	1637	3430	+	NA	C	Y	C	Y	C	Y	Y	Y	C	C	C	C	C	C	C	Y	Y	Y	Y	Y	Y	C	C	Y	Y	C	C	Y	Y	C	C	C	C	Y	C	C	C	C	C	C	C	Y	Y	C
S1640_11609	G/A	1640	11609	+	NA	G	G	R	R	G	G	G	R	G	G	R	G	R	G	H	G	G	G	G	R	R	G	R	G	G	R	R	G	R	G	R	R	G	R	R	G	G	R	R	G	G	G	G	R
S1642_30707	A/C	1642	30707	+	NA	M	M	M	M	A	A	M	A	A	M	M	A	M	M	A	M	A	A	A	M	A	M	A	A	M	M	A	M	M	N	M	N	A	N	A	A	A	M	A	N	N	A	A	M
S1644_10298	A/G	1644	10298	+	NA	A	R	R	R	A	N	R	A	R	R	R	R	A	A	A	A	R	R	R	A	A	R	A	A	R	R	R	R	A	A	A	A	A	A	A	A	R	R	A	R	A	A	R	R
S1645_29637	C/A	1645	29637	+	NA	C	M	H	M	M	C	M	C	C	M	M	H	M	C	C	C	C	C	C	C	C	C	M	C	M	C	C	C	H	C	M	M	M	C	M	C	C	C	C	N	N	C	M	C
S1646_13473	G/C	1646	13473	+	NA	G	G	S	G	S	S	G	S	G	S	S	S	S	S	G	S	S	G	G	G	S	S	G	G	S	G	G	G	S	S	G	G	G	H	G	G	G	S	G	N	G	G	G	G
S1647_14165	G/A	1647	14165	+	NA	R	R	G	R	G	R	R	G	G	R	G	R	G	R	H	R	R	G	G	G	G	R	G	G	G	G	G	R	G	R	G	G	R	G	G	G	G	G	G	N	H	G	G	R
S1651_30096	C/T	1651	30096	+	NA	C	C	Y	Y	C	Y	C	C	C	C	Y	Y	C	Y	Y	Y	Y	C	C	C	Y	Y	C	C	C	Y	Y	Y	C	Y	Y	Y	Y	C	C	C	C	Y	C	Y	C	Y	C	C
S1654_3219	C/T	1654	3219	+	NA	Y	Y	Y	Y	C	C	Y	C	C	Y	Y	Y	Y	Y	Y	Y	Y	C	C	Y	Y	Y	C	C	Y	C	C	C	Y	Y	Y	Y	C	Y	C	C	C	Y	C	N	C	C	C	C
S1657_8313	C/T	1657	8313	+	NA	Y	C	Y	Y	Y	C	Y	C	C	Y	Y	C	Y	C	C	C	C	C	C	Y	C	Y	C	C	Y	Y	C	Y	Y	Y	C	H	Y	C	C	C	C	Y	C	C	H	Y	C	Y
S1658_26763	G/T	1658	26763	+	NA	K	G	G	G	K	G	K	G	K	K	K	N	G	G	G	K	G	G	G	G	K	G	G	G	K	H	K	K	K	H	K	K	K	G	G	G	G	K	G	N	G	G	G	K
S1659_17763	A/T	1659	17763	+	NA	W	W	A	W	W	A	A	A	W	A	W	W	A	W	A	A	A	W	A	A	A	A	W	A	A	A	W	W	W	A	W	N	W	N	A	H	A	A	A	N	W	A	W	A
S1661_19553	G/C	1661	19553	+	NA	G	S	G	G	G	S	S	G	S	N	G	G	S	S	G	G	S	S	S	G	G	G	S	S	G	S	G	G	G	G	G	N	G	G	S	S	N	S	G	G	G	G	S	G
S1662_51078	C/T	1662	51078	+	NA	C	Y	C	C	C	Y	Y	C	Y	C	C	Y	C	Y	C	Y	Y	C	C	C	C	C	Y	H	C	C	Y	C	C	C	C	C	C	C	Y	Y	Y	Y	C	C	C	Y	Y	C
S1664_40456	C/G	1664	40456	+	NA	C	S	C	C	S	S	S	S	C	C	S	C	S	C	S	S	S	S	S	S	S	C	C	S	S	C	S	S	S	C	C	S	C	S	C	C	C	C	C	S	C	S	S	S
S1665_4073	A/G	1665	4073	+	NA	A	R	A	A	A	A	R	R	R	R	A	A	A	R	A	A	A	R	R	A	A	A	R	A	A	A	A	A	R	R	A	A	A	A	R	R	R	A	R	R	A	A	R	A
S1666_21746	G/A	1666	21746	+	NA	R	R	G	R	G	G	R	G	R	G	G	G	G	R	G	G	R	R	R	G	G	R	G	G	R	G	R	R	R	G	G	R	R	G	G	G	R	R	G	R	R	G	G	G
S1668_21065	C/A	1668	21065	+	NA	M	M	M	M	C	C	H	C	C	M	M	M	M	M	C	M	C	C	C	M	C	M	C	C	M	M	C	M	M	M	M	N	C	C	C	C	C	M	C	N	N	C	C	H
S1670_6613	A/G	1670	6613	+	NA	A	R	A	A	A	R	A	A	A	A	R	R	A	A	A	A	R	R	R	A	R	A	A	A	A	A	A	A	A	R	A	R	R	R	A	A	A	R	A	A	A	R	A	A
S1673_4596	T/C	1673	4596	+	NA	T	Y	T	T	T	Y	Y	T	Y	Y	T	T	Y	Y	Y	T	Y	T	T	T	T	T	Y	Y	T	Y	Y	T	T	T	T	T	T	T	Y	Y	Y	Y	T	T	T	Y	Y	T
S1675_11376	G/A	1675	11376	+	NA	R	R	R	R	G	G	R	G	G	R	R	R	R	R	H	R	G	G	G	R	G	R	G	G	R	R	G	R	R	R	R	H	G	G	G	G	G	R	G	H	R	G	G	R
S1679_15608	T/C	1679	15608	+	NA	Y	T	Y	T	Y	T	T	Y	Y	T	T	T	Y	Y	T	T	T	T	T	T	Y	Y	Y	Y	Y	T	T	T	Y	Y	T	T	T	Y	T	T	T	Y	Y	Y	Y	T	Y	T
S1681_26618	G/T	1681	26618	+	NA	K	K	K	K	G	K	K	G	G	K	G	K	G	K	K	K	K	G	G	G	G	K	G	G	G	G	G	K	G	K	K	K	K	G	G	G	G	G	G	K	G	G	G	K
S1682_2941	C/A	1682	2941	+	NA	M	M	C	M	M	H	C	C	M	C	M	M	C	M	C	C	C	N	M	C	C	C	M	C	M	M	C	M	M	C	C	M	M	N	M	M	C	C	C	N	H	C	C	C
S1683_1813	A/G	1683	1813	+	NA	A	R	A	A	A	A	R	A	R	R	R	A	A	A	A	R	R	A	A	A	A	A	R	R	A	A	A	R	A	A	A	A	A	A	A	A	R	A	R	A	A	A	R	A
S1686_6504	A/G	1686	6504	+	NA	A	R	A	A	A	H	R	A	R	R	A	R	R	R	A	A	R	A	A	A	A	A	R	R	A	R	R	A	A	A	A	A	A	A	R	R	R	R	A	A	A	R	R	A
S1692_24449	T/C	1692	24449	+	NA	T	T	T	Y	Y	Y	Y	T	Y	Y	Y	Y	T	T	Y	T	Y	T	T	T	Y	T	Y	Y	Y	T	T	Y	T	T	Y	Y	Y	T	Y	Y	T	T	T	Y	T	T	T	Y
S1695_3292	C/T	1695	3292	+	NA	C	Y	Y	Y	Y	C	Y	Y	C	C	Y	C	Y	C	Y	C	C	C	C	Y	Y	Y	Y	C	C	C	C	C	Y	C	Y	N	C	Y	Y	C	C	Y	Y	C	C	C	C	Y
S1697_12436	T/G	1697	12436	+	NA	T	T	K	T	T	K	K	T	T	K	K	K	K	K	K	K	K	T	T	T	K	K	T	T	K	T	T	T	K	K	T	K	T	K	T	T	T	K	T	K	T	T	T	T
S1701_26784	C/T	1701	26784	+	NA	C	C	Y	C	C	Y	Y	C	C	Y	Y	Y	Y	Y	C	Y	Y	C	C	Y	Y	Y	C	C	Y	C	C	C	Y	Y	C	N	C	Y	C	C	C	Y	C	C	C	C	C	C
S1702_5129	C/T	1702	5129	+	NA	C	C	C	C	C	C	Y	Y	Y	Y	C	C	C	Y	C	C	C	C	C	Y	C	C	Y	C	C	Y	C	C	Y	Y	C	C	C	C	Y	Y	C	C	Y	Y	C	C	Y	C
S1710_2189	G/T	1710	2189	+	NA	K	K	G	G	K	G	K	G	K	K	K	K	G	G	G	K	G	G	G	K	K	G	G	G	G	G	K	K	K	K	K	G	K	G	G	G	G	K	G	N	G	G	G	K
S1715_12759	C/A	1715	12759	+	NA	M	M	M	M	C	H	M	C	C	M	C	N	C	M	C	M	M	C	C	C	C	M	C	C	C	C	C	M	C	M	M	M	M	C	C	C	C	C	C	N	M	C	C	M
S1716_12476	C/T	1716	12476	+	NA	Y	Y	C	Y	C	C	Y	C	Y	Y	Y	C	C	Y	C	C	C	Y	Y	C	C	Y	C	C	Y	C	Y	Y	Y	C	C	Y	Y	C	C	C	Y	Y	C	Y	Y	C	Y	Y
S1721_778	A/T	1721	778	+	NA	A	A	W	A	A	H	A	W	A	A	A	A	W	A	A	A	A	A	A	W	A	A	W	A	A	W	W	A	H	A	W	H	A	A	W	A	A	W	A	A	A	A	A	W
S1722_25904	C/A	1722	25904	+	NA	C	M	C	C	C	C	C	M	M	M	M	N	C	M	C	M	C	C	C	M	C	C	M	M	N	C	M	C	C	C	M	N	C	C	M	M	C	M	C	N	H	C	M	M
S1724_20646	T/C	1724	20646	+	NA	Y	Y	T	Y	T	T	Y	T	Y	T	T	T	T	H	T	T	Y	Y	Y	T	T	Y	T	T	Y	T	Y	Y	Y	T	T	Y	Y	T	T	T	Y	Y	T	Y	H	T	T	Y
S1727_4393	A/G	1727	4393	+	NA	R	R	A	R	A	N	H	H	A	A	A	A	A	A	R	R	H	R	R	H	R	A	A	R	R	A	R	R	R	A	A	A	A	N	A	A	A	A	A	N	N	R	R	A
S1728_13812	A/C	1728	13812	+	NA	M	A	M	M	A	A	M	A	A	M	M	M	M	M	A	M	A	A	A	M	A	M	M	A	M	M	A	M	M	M	A	A	M	A	A	A	A	M	A	A	M	M	A	M
S1732_12095	T/G	1732	12095	+	NA	T	T	T	K	T	H	T	T	T	K	K	T	T	T	T	T	K	N	T	T	K	T	K	T	K	H	T	K	T	T	K	T	T	T	K	K	T	T	T	T	T	T	T	K
S1735_3870	C/T	1735	3870	+	NA	Y	Y	Y	Y	C	C	Y	C	C	Y	Y	Y	Y	Y	Y	Y	Y	C	C	Y	C	Y	C	C	Y	Y	C	Y	Y	Y	C	Y	C	C	C	C	C	Y	C	C	Y	C	C	Y
S1737_5760	C/T	1737	5760	+	NA	C	Y	C	Y	Y	Y	C	C	Y	Y	Y	C	C	C	H	C	Y	C	C	C	Y	C	Y	Y	C	C	C	Y	C	C	C	Y	Y	C	C	Y	C	C	C	C	N	C	Y	Y
S1740_30015	C/A	1740	30015	+	NA	M	M	M	M	C	H	M	C	M	M	M	C	C	M	C	C	C	M	M	C	C	M	C	C	M	C	M	M	C	C	C	H	M	C	C	C	M	M	C	M	C	C	M	M
S1741_16104	A/G	1741	16104	+	NA	R	R	R	R	A	R	R	A	R	R	R	A	A	R	A	A	A	R	R	A	A	R	A	A	R	A	R	R	A	A	A	A	R	A	A	A	R	R	A	A	R	A	R	R
S1746_1744	T/C	1746	1744	+	NA	T	Y	T	Y	Y	T	Y	T	Y	Y	Y	T	T	T	Y	Y	Y	T	T	T	T	T	Y	Y	T	T	T	Y	T	T	T	N	T	T	T	T	H	T	T	T	T	T	Y	H
S1748_12557	C/G	1748	12557	+	NA	C	C	S	S	C	S	C	C	C	C	S	S	C	S	S	S	S	C	C	C	C	S	C	C	C	S	S	S	C	S	S	C	S	C	C	C	C	C	C	N	C	S	C	C
S1749_6785	G/T	1749	6785	+	NA	G	G	K	G	G	K	G	K	G	G	G	K	K	G	K	G	G	G	G	K	G	G	K	G	G	K	K	G	K	G	K	K	G	G	K	G	G	K	K	G	G	G	G	K
S1750_11431	T/A	1750	11431	+	NA	T	H	T	T	T	W	W	T	W	W	T	W	W	W	W	T	W	W	W	T	T	T	W	W	T	W	W	T	T	T	T	N	T	T	W	W	W	W	T	N	T	W	W	T
S1752_24450	G/C	1752	24450	+	NA	G	S	G	G	G	G	G	G	S	S	G	S	G	H	S	G	S	H	S	G	S	G	G	S	G	S	G	G	G	G	G	G	S	S	G	G	S	S	G	N	G	S	G	G
S1753_8522	A/G	1753	8522	+	NA	A	A	R	R	A	R	R	R	A	A	R	A	R	A	R	A	A	A	A	R	R	A	R	A	A	A	A	A	R	A	R	N	A	A	R	A	A	R	R	N	A	A	A	R
S1755_981	A/G	1755	981	+	NA	A	R	A	A	R	R	R	R	A	A	R	A	R	A	R	R	R	R	R	R	R	A	A	R	R	A	R	R	R	A	A	R	A	R	A	A	A	A	A	R	A	R	R	R
S1756_9852	A/G	1756	9852	+	NA	A	A	A	R	R	R	A	A	A	R	R	H	A	A	A	R	R	A	A	A	R	A	R	A	R	R	A	R	A	A	R	R	R	A	R	R	A	A	A	H	A	A	A	R
S1757_3087	T/C	1757	3087	+	NA	T	Y	T	T	Y	T	Y	T	Y	Y	Y	T	T	T	T	Y	Y	T	T	T	T	T	Y	Y	T	T	T	Y	T	T	T	T	T	T	T	T	Y	T	Y	T	T	T	Y	T
S1759_7530	T/C	1759	7530	+	NA	T	T	T	Y	Y	T	T	T	T	Y	Y	T	T	T	Y	Y	Y	T	T	T	Y	T	Y	T	Y	T	T	Y	T	T	T	T	Y	T	Y	Y	T	T	T	T	T	T	T	Y
S1760_6005	T/C	1760	6005	+	NA	Y	Y	Y	Y	T	T	Y	T	T	Y	Y	N	Y	Y	T	Y	T	T	T	Y	T	Y	T	T	Y	T	T	H	Y	H	Y	H	T	T	T	T	T	Y	T	N	N	T	T	Y
S1763_2479	G/A	1763	2479	+	NA	G	R	G	G	G	G	G	G	R	R	G	R	G	R	R	G	R	R	R	G	R	G	G	R	G	R	G	G	G	G	G	G	R	R	G	G	R	R	G	G	G	R	G	G
S1764_5150	G/A	1764	5150	+	NA	G	R	R	R	R	G	R	R	G	G	R	G	R	G	R	G	G	G	G	G	R	R	R	G	R	G	G	G	R	G	R	R	G	R	R	G	G	R	R	G	G	G	G	R
S1765_6439	C/T	1765	6439	+	NA	C	Y	C	C	C	Y	Y	C	Y	C	C	Y	Y	Y	Y	C	Y	C	C	C	C	C	Y	Y	C	C	Y	C	C	C	C	C	C	C	Y	Y	Y	Y	C	C	C	Y	Y	C
S1766_7665	T/C	1766	7665	+	NA	T	T	T	Y	Y	H	Y	T	T	Y	Y	Y	T	T	H	T	H	T	T	T	Y	T	T	Y	T	Y	T	Y	T	T	H	T	T	N	Y	Y	T	T	T	N	T	T	T	T
S1767_14259	C/T	1767	14259	+	NA	C	Y	C	Y	Y	C	Y	C	C	C	Y	Y	Y	C	C	C	C	C	C	C	C	C	Y	C	Y	Y	C	C	Y	C	Y	Y	Y	C	C	C	C	C	C	C	Y	C	Y	C
S1768_8062	A/C	1768	8062	+	NA	A	M	A	A	M	M	M	M	M	H	H	A	M	A	N	M	M	N	M	M	M	A	A	M	M	A	M	M	M	A	A	N	A	H	A	A	H	A	A	N	H	M	M	M
S1769_7633	C/A	1769	7633	+	NA	C	C	C	C	M	C	C	M	M	C	C	C	C	M	C	M	C	C	C	M	C	C	M	C	C	M	C	C	M	M	C	C	C	C	M	C	M	C	M	N	C	C	M	C
S1771_10563	G/C	1771	10563	+	NA	S	S	S	S	G	G	S	G	G	S	S	G	S	S	G	S	G	G	G	S	G	S	G	G	S	S	G	S	S	S	S	S	G	G	G	G	G	S	G	G	H	G	G	S
S1772_9927	A/G	1772	9927	+	NA	R	R	R	R	A	A	R	A	A	R	R	R	R	R	A	R	A	A	A	R	A	R	A	A	R	R	A	R	R	R	R	H	A	A	A	A	A	R	A	R	A	A	A	R
S1773_4387	G/C	1773	4387	+	NA	G	G	G	S	S	G	S	G	S	S	S	G	G	G	G	S	S	N	G	G	G	G	S	S	G	G	G	S	G	G	G	G	S	G	G	S	H	G	G	G	G	G	S	S
S1774_2786	T/C	1774	2786	+	NA	T	T	T	Y	Y	Y	Y	T	Y	Y	Y	Y	T	T	Y	T	Y	T	T	T	Y	T	H	Y	Y	T	T	Y	T	T	H	Y	Y	T	Y	Y	T	T	T	H	T	T	T	Y
S1778_24044	T/A	1778	24044	+	NA	T	W	W	W	W	T	W	W	T	T	W	T	W	T	W	T	T	T	T	T	W	W	W	T	W	T	T	W	W	T	W	W	T	W	W	T	T	W	W	T	T	T	T	W
S1779_3797	A/C	1779	3797	+	NA	M	A	A	A	A	A	M	A	A	M	A	M	A	M	A	M	A	A	A	A	M	M	A	A	M	H	M	M	M	M	A	M	M	A	A	A	A	A	A	A	A	A	A	M
S1781_2547	G/A	1781	2547	+	NA	R	R	R	R	G	G	R	G	G	R	R	R	R	R	R	R	R	G	G	R	G	R	G	G	R	R	G	R	R	R	R	R	G	G	G	G	G	R	G	R	G	G	G	G
S1784_5348	T/A	1784	5348	+	NA	W	W	T	T	W	T	T	T	W	W	W	W	T	T	T	W	T	N	T	W	W	T	W	T	W	W	W	W	W	W	W	W	W	T	W	W	T	W	T	N	T	T	T	W
S1786_6637	A/G	1786	6637	+	NA	R	A	R	A	R	A	A	R	R	R	A	R	R	R	A	A	A	A	A	A	R	R	R	A	R	A	A	A	R	R	A	R	R	R	A	A	A	R	A	H	R	A	R	A
S1788_24779	A/G	1788	24779	+	NA	A	A	R	R	A	R	R	A	A	A	A	R	A	R	R	R	R	A	A	A	A	R	A	A	A	R	A	R	A	R	R	R	R	A	A	A	A	A	A	R	R	A	A	A
S1792_11924	G/A	1792	11924	+	NA	G	G	G	G	R	G	G	R	R	G	G	G	R	R	G	R	G	G	G	R	G	G	R	G	G	R	R	R	R	H	G	G	G	G	G	G	R	G	R	G	N	G	G	G
S1793_3790	T/C	1793	3790	+	NA	Y	T	Y	Y	T	Y	Y	T	T	Y	T	Y	T	Y	Y	Y	Y	T	T	T	T	Y	T	T	T	Y	T	Y	T	Y	Y	Y	H	T	T	T	T	T	T	Y	T	T	T	Y
S1794_16024	G/T	1794	16024	+	NA	K	K	K	K	G	K	K	G	K	H	K	G	G	G	G	G	K	K	K	G	G	H	G	G	K	K	K	K	G	G	G	H	K	G	G	G	K	K	G	H	G	G	K	K
S1796_10008	T/A	1796	10008	+	NA	W	W	W	W	T	T	W	T	T	W	W	W	W	W	W	W	W	T	T	W	T	W	T	T	W	W	T	T	W	W	W	N	T	T	T	T	T	W	T	H	T	T	T	T
S1797_7731	A/T	1797	7731	+	NA	A	W	A	A	W	A	W	A	W	W	W	A	A	A	A	W	W	A	A	A	A	A	W	W	A	A	A	W	A	A	A	A	A	A	A	A	W	A	W	A	A	A	W	A
S1800_11686	C/A	1800	11686	+	NA	M	M	M	M	C	C	M	C	C	M	M	H	M	M	C	M	C	C	C	M	C	M	C	C	M	M	C	M	M	M	M	C	C	C	C	C	C	M	C	C	C	C	C	M
S1801_11751	A/C	1801	11751	+	NA	A	A	A	M	M	M	A	A	M	M	M	A	A	A	M	A	H	A	A	A	A	A	M	M	A	A	A	M	A	A	A	M	M	A	A	M	A	A	A	A	A	A	M	M
S1802_13787	C/T	1802	13787	+	NA	Y	Y	Y	Y	C	Y	Y	C	Y	C	Y	C	C	C	C	C	Y	N	Y	C	C	Y	C	C	Y	Y	C	Y	C	C	N	H	C	C	C	C	Y	H	C	N	C	C	C	H
S1803_29615	G/A	1803	29615	+	NA	G	G	G	R	G	G	R	G	R	R	R	G	G	G	H	R	R	G	G	G	G	G	R	R	G	G	G	R	G	G	G	G	R	G	G	G	R	G	G	N	G	G	R	R
S1805_19947	G/A	1805	19947	+	NA	G	R	G	G	G	G	G	G	R	R	G	R	G	R	R	G	R	R	R	G	G	G	G	R	G	R	G	G	G	G	G	G	R	G	G	G	R	R	G	G	G	R	G	G
S1806_11137	A/T	1806	11137	+	NA	W	W	A	A	A	W	W	A	W	W	W	A	A	W	A	W	A	A	A	W	A	A	W	W	W	A	W	A	A	A	W	A	W	A	W	W	A	W	A	A	W	A	W	W
S1808_3163	A/G	1808	3163	+	NA	A	A	A	R	H	H	A	A	A	H	R	R	A	A	A	R	R	A	N	A	H	A	H	A	R	R	A	R	A	A	R	N	A	A	R	R	A	A	A	N	N	R	A	H
S1810_24989	G/A	1810	24989	+	NA	G	G	R	G	G	R	R	G	G	R	R	R	R	R	R	R	R	G	G	G	R	R	G	G	R	G	G	G	R	R	G	R	G	R	G	G	G	R	G	R	G	G	G	G
S1813_18804	A/G	1813	18804	+	NA	R	R	A	A	A	R	A	A	R	R	R	A	A	R	A	R	A	A	A	R	A	A	R	R	R	A	R	A	A	A	R	A	R	A	R	R	A	R	A	A	R	A	R	R
S1815_2080	A/C	1815	2080	+	NA	A	M	A	M	A	H	M	M	A	A	A	A	A	A	M	M	H	M	M	M	M	A	A	A	M	A	A	M	M	A	A	A	A	M	A	A	A	A	A	N	N	M	M	A
S1816_23391	C/T	1816	23391	+	NA	Y	Y	C	Y	C	C	Y	C	Y	C	C	C	C	Y	C	C	Y	Y	Y	C	C	Y	C	C	Y	C	Y	Y	Y	C	C	Y	Y	C	C	C	Y	Y	C	H	Y	C	C	Y
S1819_5886	A/G	1819	5886	+	NA	R	R	R	R	A	A	R	A	A	R	R	R	R	A	R	R	R	A	A	R	A	R	A	A	R	R	A	R	R	R	R	A	A	A	A	A	A	R	A	H	A	A	A	R
S1820_29889	C/T	1820	29889	+	NA	Y	C	Y	C	Y	Y	Y	Y	Y	C	C	C	Y	Y	C	C	C	C	C	C	Y	Y	Y	Y	Y	C	C	C	Y	Y	C	Y	C	Y	C	C	C	Y	Y	Y	Y	C	Y	C
S1824_21528	T/C	1824	21528	+	NA	H	Y	Y	Y	T	T	Y	T	T	Y	Y	H	Y	Y	T	Y	N	T	T	Y	T	Y	T	T	H	Y	T	Y	Y	Y	Y	T	T	T	T	T	T	Y	T	T	Y	T	T	Y
S1829_17727	T/C	1829	17727	+	NA	T	T	Y	Y	T	Y	T	T	T	T	Y	Y	T	Y	T	Y	Y	T	T	T	Y	Y	T	T	T	Y	Y	Y	T	Y	T	Y	T	T	T	T	T	Y	T	T	T	Y	T	T
S1830_1554	T/G	1830	1554	+	NA	T	K	T	K	K	K	K	K	T	T	K	T	T	T	K	K	H	K	K	K	H	T	T	K	K	T	K	K	K	T	T	T	T	H	T	T	T	T	T	N	N	K	K	K
S1834_12733	G/A	1834	12733	+	NA	R	R	R	R	G	G	R	G	G	R	R	R	R	R	R	R	R	G	G	R	G	R	G	G	R	R	G	R	R	R	R	R	G	G	G	G	G	R	G	R	R	G	G	R
S1835_4170	G/C	1835	4170	+	NA	G	S	G	G	S	G	S	S	S	S	S	G	S	G	S	S	S	S	S	S	S	G	G	H	S	G	S	S	S	G	G	G	G	S	G	G	S	G	G	N	N	S	G	G
S1839_27137	G/A	1839	27137	+	NA	R	G	R	G	R	G	G	R	R	R	G	G	R	R	G	G	G	G	G	G	R	R	R	G	R	G	G	G	R	R	G	H	G	R	G	G	G	R	R	N	R	G	G	G
S1842_14742	A/G	1842	14742	+	NA	A	A	R	A	A	R	R	A	A	R	R	R	R	R	A	R	R	A	A	R	R	R	A	A	R	A	A	A	R	R	A	R	A	R	A	A	A	R	A	N	A	A	A	A
S1845_2125	G/A	1845	2125	+	NA	R	H	R	R	G	H	R	G	G	H	G	H	G	R	R	R	R	G	G	G	G	R	G	G	G	R	G	R	G	R	R	H	R	G	G	G	G	G	G	H	N	G	G	R
S1846_27398	T/G	1846	27398	+	NA	K	K	T	T	K	T	T	T	K	K	K	T	T	K	T	K	T	T	T	K	T	T	K	T	K	T	K	K	K	T	K	N	K	T	K	K	T	K	T	T	K	T	K	K
S1847_6650	T/G	1847	6650	+	NA	K	K	T	T	T	K	K	T	K	K	K	T	T	K	T	K	T	K	T	K	T	T	K	K	K	T	K	T	T	T	K	T	K	T	K	K	T	K	T	T	K	T	K	K
S1850_8556	G/A	1850	8556	+	NA	G	G	R	R	G	R	R	G	G	R	R	G	G	R	R	R	G	G	G	G	R	R	G	G	R	G	G	G	R	R	G	G	G	H	G	G	G	R	G	G	G	G	G	G
S1855_10352	A/G	1855	10352	+	NA	A	A	A	R	R	R	A	A	R	R	R	A	A	A	R	A	R	A	A	A	R	A	R	R	A	A	A	R	A	A	A	R	R	A	A	R	A	A	A	R	A	A	R	R
S1857_9893	C/T	1857	9893	+	NA	C	C	C	Y	Y	Y	Y	C	Y	Y	Y	Y	C	C	Y	C	Y	C	C	C	Y	C	Y	Y	Y	C	C	Y	C	C	Y	Y	Y	C	Y	Y	C	C	C	Y	C	C	C	Y
S1861_38248	A/G	1861	38248	+	NA	A	R	A	A	A	A	R	R	R	R	A	A	A	R	A	A	A	R	R	A	A	A	R	A	A	A	A	A	R	R	A	A	A	A	R	R	R	A	R	R	A	R	R	A
S1864_10346	G/A	1864	10346	+	NA	G	R	R	R	R	R	R	R	G	G	R	G	R	G	R	G	G	G	G	R	R	G	R	G	G	G	G	G	R	G	R	R	G	R	R	G	G	R	R	G	G	G	G	R
S1866_18822	T/G	1866	18822	+	NA	K	K	K	K	T	T	K	T	K	K	K	K	T	T	T	T	K	K	K	T	T	K	T	T	K	T	K	K	T	T	T	K	T	T	T	T	K	K	T	T	T	T	K	K
S1867_21058	C/G	1867	21058	+	NA	S	S	C	C	S	C	C	C	C	S	S	C	C	S	C	S	C	C	C	C	C	C	S	C	S	C	S	S	C	C	S	C	S	C	S	S	C	S	C	C	S	C	S	C
S1876_23970	T/C	1876	23970	+	NA	Y	T	Y	T	H	T	T	Y	Y	Y	T	Y	Y	Y	T	T	T	T	T	T	Y	Y	Y	T	H	T	T	T	Y	Y	T	H	Y	Y	T	T	T	Y	T	H	Y	T	Y	T
S1878_25068	G/A	1878	25068	+	NA	G	G	G	G	R	G	R	R	R	R	G	G	G	R	G	G	G	G	G	R	G	G	R	G	G	R	G	G	R	R	G	G	G	G	R	R	R	G	R	R	G	G	R	G
S1879_9319	C/T	1879	9319	+	NA	Y	C	Y	C	Y	C	C	Y	Y	Y	C	Y	Y	Y	C	C	Y	C	C	C	Y	Y	Y	C	Y	C	C	C	Y	Y	C	Y	Y	Y	C	C	C	C	C	Y	Y	C	Y	Y
S1884_34276	C/G	1884	34276	+	NA	C	S	C	C	C	C	C	C	C	S	S	S	C	C	N	C	S	H	S	C	S	C	C	C	C	S	C	C	C	C	C	S	S	S	C	C	C	S	S	C	N	S	C	C
S1889_13782	C/T	1889	13782	+	NA	C	Y	C	C	C	C	Y	Y	Y	Y	C	C	C	Y	C	C	C	Y	Y	C	C	C	Y	C	C	C	C	C	Y	Y	C	C	C	C	Y	Y	Y	C	Y	Y	C	Y	Y	C
S1890_4324	T/C	1890	4324	+	NA	T	T	T	Y	Y	Y	T	T	T	T	T	T	Y	Y	Y	T	T	T	T	T	T	Y	Y	Y	Y	T	T	T	Y	T	Y	Y	T	N	H	Y	T	Y	Y	Y	T	H	Y	T
S1891_6326	C/T	1891	6326	+	NA	C	C	C	Y	Y	N	Y	C	Y	Y	Y	Y	C	C	H	C	Y	C	C	C	Y	C	Y	N	Y	C	C	Y	C	C	Y	H	Y	C	C	Y	C	C	C	N	N	C	C	Y
S1892_8882	G/A	1892	8882	+	NA	G	G	R	R	G	R	R	G	G	R	G	R	G	R	R	R	H	G	G	G	G	R	G	G	G	H	G	R	G	R	R	G	R	G	G	G	G	G	G	R	G	G	G	R
S1894_40449	A/C	1894	40449	+	NA	A	A	M	M	A	M	A	A	A	A	M	M	A	M	A	M	M	A	A	A	M	M	A	A	A	M	M	M	A	M	M	M	M	A	A	A	A	M	A	M	A	M	A	A
S1899_10209	A/T	1899	10209	+	NA	A	W	A	A	A	W	W	A	W	W	A	W	W	W	A	A	W	A	A	A	A	A	W	W	A	W	W	A	A	A	A	A	A	A	W	W	W	W	A	A	A	W	W	A
S1901_8530	G/A	1901	8530	+	NA	R	R	H	R	G	R	H	G	R	H	R	G	G	G	G	G	H	R	R	G	G	R	G	G	R	R	R	R	G	N	G	G	G	G	G	G	R	G	G	H	N	G	R	R
S1904_2689	C/T	1904	2689	+	NA	C	Y	C	C	Y	C	Y	C	Y	Y	Y	C	Y	C	Y	Y	Y	C	Y	C	Y	C	C	Y	Y	C	Y	Y	Y	C	C	Y	Y	Y	C	C	Y	C	C	Y	C	Y	Y	Y
S1905_15583	A/C	1905	15583	+	NA	A	A	A	M	M	M	M	A	M	M	M	A	A	A	M	A	M	A	A	A	M	A	M	M	A	A	A	M	A	A	A	M	M	A	A	M	A	A	A	H	N	A	A	M
S1907_8361	C/G	1907	8361	+	NA	C	S	S	S	S	S	S	S	C	C	S	C	S	C	S	C	C	C	C	S	S	S	S	C	C	C	C	C	S	C	S	S	C	S	S	C	C	S	S	C	C	C	C	S
S1908_151	G/C	1908	151	+	NA	G	G	G	S	G	S	S	G	S	S	S	G	G	G	S	G	S	G	G	G	S	G	S	S	S	G	G	S	G	G	S	S	G	G	G	S	G	G	G	G	G	G	G	S
S1909_13768	T/C	1909	13768	+	NA	T	Y	T	Y	T	H	Y	Y	T	T	T	T	T	T	H	T	N	Y	Y	Y	Y	T	T	T	Y	Y	T	Y	Y	H	T	N	T	H	H	Y	T	T	Y	H	T	H	T	T
S1910_13503	T/G	1910	13503	+	NA	K	T	K	K	T	K	K	T	T	K	T	K	T	K	H	K	K	T	T	T	T	K	T	T	T	K	T	K	T	K	K	K	K	T	T	T	T	T	T	K	K	T	T	K
S1911_9020	A/G	1911	9020	+	NA	A	R	A	A	R	R	R	R	H	R	R	R	R	A	A	R	R	H	R	A	R	A	A	R	R	A	R	R	R	N	A	H	R	R	A	A	R	A	A	A	A	R	R	R
S1913_13802	T/C	1913	13802	+	NA	Y	Y	H	Y	T	Y	Y	T	Y	Y	Y	Y	T	T	T	T	Y	N	Y	T	T	T	T	T	Y	Y	Y	Y	T	T	T	N	T	T	T	T	Y	Y	T	Y	N	T	Y	T
S1916_9140	A/C	1916	9140	+	NA	A	A	M	M	M	M	A	A	A	A	A	A	M	M	M	A	A	A	A	A	A	M	M	M	M	A	A	A	M	A	M	M	A	A	M	M	A	M	M	M	A	M	M	A
S1919_10608	A/G	1919	10608	+	NA	A	R	A	A	A	A	R	A	R	R	A	R	R	R	R	A	R	R	R	A	A	A	R	R	A	R	A	A	A	A	A	A	A	A	R	R	R	R	A	A	A	R	R	A
S1923_1594	G/T	1923	1594	+	NA	G	G	K	G	G	K	G	G	G	G	G	G	K	G	K	G	G	G	G	K	G	G	K	G	G	K	K	G	K	G	K	G	G	G	K	G	G	K	K	G	G	G	G	K
S1924_18779	C/G	1924	18779	+	NA	C	C	C	C	S	N	C	S	C	C	C	C	C	S	C	S	C	C	C	S	C	C	S	C	C	S	C	C	S	S	C	C	C	C	S	C	S	C	S	N	N	N	S	C
S1926_4023	T/C	1926	4023	+	NA	T	Y	T	Y	Y	T	Y	T	Y	Y	Y	T	T	T	T	Y	T	N	T	T	T	T	H	Y	T	T	T	Y	T	T	T	Y	T	T	T	T	Y	T	Y	T	T	T	Y	Y
S1927_14813	C/T	1927	14813	+	NA	C	C	Y	Y	C	Y	C	C	C	C	Y	Y	C	Y	C	Y	Y	C	C	Y	Y	Y	C	C	C	Y	Y	Y	C	Y	Y	N	C	C	C	C	C	Y	C	Y	C	N	C	C
S1929_9861	T/A	1929	9861	+	NA	T	W	T	T	W	W	W	W	W	W	W	T	W	T	W	W	W	W	W	W	W	T	T	W	W	T	W	W	W	T	T	W	W	W	T	T	W	T	T	W	W	W	W	W
S1930_647	G/C	1930	647	+	NA	G	S	G	G	G	G	S	G	S	S	G	S	S	S	S	G	S	S	S	G	G	G	S	S	G	S	G	G	G	G	G	G	G	G	S	S	S	S	G	G	G	S	S	G
S1932_24678	C/T	1932	24678	+	NA	C	C	C	C	Y	C	Y	C	Y	Y	Y	C	C	C	Y	Y	Y	C	C	C	C	C	C	Y	C	C	C	Y	C	C	C	C	Y	C	C	Y	Y	C	C	C	C	C	Y	Y
S1934_10032	T/G	1934	10032	+	NA	T	T	K	K	T	H	T	K	T	T	K	K	K	T	K	T	T	T	T	K	K	T	H	T	T	T	K	T	K	N	K	N	T	H	K	T	T	H	K	N	N	T	T	K
S1935_9265	G/C	1935	9265	+	NA	S	S	S	S	G	G	S	G	G	S	S	S	S	S	S	S	S	G	G	S	S	S	G	G	S	S	G	G	S	S	S	H	G	S	G	G	G	S	G	G	G	G	G	G
S1936_10829	G/C	1936	10829	+	NA	G	S	G	G	S	S	S	S	G	S	S	S	S	G	N	S	S	S	S	G	S	G	G	S	S	G	S	G	S	G	G	H	S	G	G	G	S	G	G	N	G	N	G	S
S1938_308	C/T	1938	308	+	NA	Y	Y	C	C	Y	C	C	C	Y	Y	Y	Y	C	C	C	Y	C	C	C	Y	C	C	Y	C	Y	Y	Y	Y	Y	Y	Y	Y	Y	C	Y	Y	C	Y	C	Y	Y	C	Y	Y
S1939_11536	A/G	1939	11536	+	NA	R	R	A	A	A	R	R	R	R	R	R	A	A	R	A	R	A	A	A	R	A	A	R	R	R	A	R	A	A	A	R	A	A	A	R	R	A	R	A	A	R	A	R	R
S1941_26182	G/A	1941	26182	+	NA	G	R	G	G	G	G	R	G	R	R	G	R	R	R	G	G	R	R	R	G	G	G	R	R	G	R	G	G	G	G	G	G	G	N	R	R	R	R	G	N	G	R	R	G
S1942_23071	A/T	1942	23071	+	NA	A	W	W	W	W	A	W	W	A	A	W	A	W	A	W	A	A	A	A	W	W	W	W	A	A	A	A	A	W	A	W	W	A	W	W	A	A	W	W	A	A	A	A	W
S1943_17593	A/G	1943	17593	+	NA	R	R	R	R	A	A	R	A	A	R	R	A	R	R	R	R	R	A	A	R	R	A	A	A	A	A	A	A	R	A	R	A	A	R	A	A	A	R	A	N	A	A	A	A
S1944_14349	A/G	1944	14349	+	NA	R	R	R	R	A	R	R	A	R	R	R	A	A	R	A	A	A	R	R	A	A	R	A	A	R	A	R	R	A	A	A	R	R	A	A	A	R	R	A	R	A	A	R	R
S1946_8322	G/A	1946	8322	+	NA	G	R	G	G	G	G	R	R	R	R	G	G	G	R	G	G	G	R	R	G	G	G	R	G	G	G	G	G	R	G	G	G	G	G	H	R	R	G	R	H	G	R	R	G
S1948_26855	G/A	1948	26855	+	NA	G	R	G	R	R	G	R	G	G	G	R	N	R	G	N	G	N	G	G	G	G	G	R	G	R	R	G	G	R	N	R	H	R	G	R	G	G	G	G	N	G	G	R	G
S1952_19934	C/G	1952	19934	+	NA	C	S	S	S	S	H	S	H	C	C	S	C	S	C	S	C	C	C	C	S	S	S	S	C	C	C	C	C	S	C	S	C	C	S	S	C	C	S	S	N	N	N	C	S
S1954_147	A/G	1954	147	+	NA	A	R	R	R	A	A	R	A	A	R	A	R	R	R	R	R	H	A	A	R	A	R	A	A	H	R	A	H	R	R	R	R	A	N	A	A	A	R	A	H	H	A	A	H
S1955_10293	C/G	1955	10293	+	NA	C	C	C	S	S	C	S	C	S	H	S	C	C	C	S	S	H	C	C	C	C	C	S	S	C	C	C	S	C	C	C	N	S	C	C	S	S	C	C	C	N	C	S	S
S1957_10189	A/C	1957	10189	+	NA	A	H	A	A	A	A	M	A	M	M	A	A	M	M	M	A	M	N	M	A	A	A	M	A	A	H	A	A	A	A	A	N	N	A	M	M	M	M	A	A	A	M	M	A
S1958_9472	A/C	1958	9472	+	NA	M	M	M	M	A	N	M	A	A	M	M	M	M	M	H	M	H	A	A	M	A	M	A	A	M	M	A	M	M	M	M	M	A	A	A	A	A	H	A	N	H	A	A	H
S1959_13268	A/G	1959	13268	+	NA	R	R	A	R	A	A	R	A	R	R	R	A	A	R	A	A	A	R	R	A	A	R	A	A	R	A	R	R	R	A	A	R	R	A	A	A	R	R	A	A	A	A	R	R
S1960_17196	G/A	1960	17196	+	NA	R	R	R	R	G	R	R	G	G	R	R	R	G	G	G	G	R	H	H	G	G	R	G	G	R	R	R	R	G	G	G	G	G	G	G	G	R	R	G	R	G	G	R	R
S1961_4312	C/T	1961	4312	+	NA	Y	Y	Y	Y	C	C	Y	C	C	Y	C	Y	C	H	C	Y	Y	C	C	C	C	Y	C	C	C	C	C	Y	C	Y	Y	Y	Y	C	C	C	C	C	C	N	H	C	C	Y
S1962_7888	T/G	1962	7888	+	NA	T	T	K	K	T	K	K	K	T	T	K	T	K	T	K	T	T	T	T	K	K	T	K	T	T	K	K	T	K	T	K	K	T	K	K	T	T	K	K	N	T	T	T	K
S1964_2446	G/A	1964	2446	+	NA	G	R	H	R	R	G	R	R	G	G	R	G	R	G	R	G	G	G	G	R	R	R	R	G	R	G	G	G	R	G	R	R	G	R	R	G	G	R	H	G	N	G	G	R
S1967_1103	G/T	1967	1103	+	NA	H	K	K	K	G	G	K	G	K	K	K	K	G	G	N	G	G	K	K	G	G	K	G	G	G	K	K	K	G	G	K	K	G	G	G	G	K	K	G	N	N	G	K	K
S1968_11361	T/C	1968	11361	+	NA	T	Y	Y	Y	Y	N	H	Y	T	T	Y	T	Y	T	Y	T	N	T	T	Y	Y	Y	Y	Y	Y	T	T	T	Y	T	Y	Y	T	N	Y	T	T	Y	Y	T	T	T	T	Y
S1971_7398	A/G	1971	7398	+	NA	R	R	R	R	A	A	R	A	A	R	R	H	R	R	A	R	A	N	A	R	A	R	A	A	R	R	A	R	R	R	R	H	A	A	A	A	A	R	A	R	N	A	A	R
S1972_19932	C/G	1972	19932	+	NA	S	C	N	C	S	C	C	H	S	S	C	H	S	H	C	C	N	C	C	C	S	S	S	C	S	C	C	C	H	S	C	C	C	S	C	C	C	S	S	N	N	C	S	C
S1978_13453	G/A	1978	13453	+	NA	G	G	G	R	R	R	R	G	R	R	R	R	G	G	R	G	R	G	G	G	R	G	R	R	R	G	G	R	G	G	R	R	R	G	R	R	G	G	G	R	G	G	G	R
S1979_10701	T/C	1979	10701	+	NA	T	T	T	T	H	T	Y	Y	Y	Y	T	T	T	Y	T	T	T	T	T	Y	T	T	Y	T	T	Y	T	T	Y	Y	T	T	T	T	Y	Y	Y	T	Y	H	T	T	Y	T
S1982_5445	G/C	1982	5445	+	NA	G	G	G	S	S	H	S	G	S	S	S	G	G	G	H	S	S	N	G	G	G	G	S	S	G	G	G	S	G	G	G	G	S	G	G	S	S	G	G	G	N	G	S	S
S1984_702	T/C	1984	702	+	NA	T	Y	T	T	T	T	Y	Y	Y	Y	T	T	T	Y	T	T	T	Y	Y	T	T	T	Y	T	T	T	T	T	Y	Y	T	T	T	T	Y	Y	Y	T	Y	Y	T	T	Y	T
S1985_26135	G/C	1985	26135	+	NA	G	G	S	G	S	G	G	S	S	G	G	G	S	S	G	S	G	G	G	S	G	G	S	G	G	S	S	S	S	S	G	G	G	G	G	G	S	G	S	S	G	S	G	G
S1986_27240	T/C	1986	27240	+	NA	T	T	Y	Y	T	Y	T	T	T	T	T	Y	T	Y	Y	Y	Y	T	T	T	T	Y	T	T	T	Y	Y	Y	T	Y	Y	Y	Y	T	T	T	T	T	T	N	T	T	T	T
S1988_19104	G/C	1988	19104	+	NA	S	G	G	G	S	G	G	S	S	S	G	S	S	S	G	G	S	N	G	G	S	S	S	G	S	G	G	G	S	S	G	S	S	S	G	G	G	G	G	N	S	G	S	G
S1989_16840	T/C	1989	16840	+	NA	Y	Y	H	Y	Y	T	Y	N	Y	Y	Y	T	T	T	T	T	Y	Y	Y	T	T	Y	T	T	T	Y	Y	Y	T	T	H	H	T	T	T	T	Y	Y	T	H	T	T	Y	Y
S1990_1146	C/T	1990	1146	+	NA	C	Y	C	C	Y	Y	Y	Y	Y	Y	Y	C	Y	C	N	Y	H	H	Y	N	Y	C	C	Y	Y	C	H	Y	Y	C	C	Y	Y	Y	C	C	Y	C	C	H	N	H	Y	Y
S1991_15678	T/C	1991	15678	+	NA	Y	T	Y	Y	T	H	Y	N	T	Y	Y	N	T	T	T	T	T	T	Y	T	T	Y	T	T	Y	T	Y	Y	T	T	T	N	Y	T	T	T	Y	T	T	T	T	T	Y	Y
S1992_13552	A/G	1992	13552	+	NA	A	A	R	R	A	R	A	A	A	A	A	R	A	R	R	R	R	A	A	A	A	R	A	A	A	R	R	R	A	R	R	R	R	A	A	A	A	A	A	R	A	R	A	A
S1993_19258	T/G	1993	19258	+	NA	T	K	T	T	T	T	T	T	K	K	T	K	T	K	H	T	K	H	K	T	K	T	T	K	T	K	T	T	T	T	T	T	K	H	T	T	K	K	T	T	T	K	T	T
S1994_8538	T/C	1994	8538	+	NA	T	Y	T	Y	Y	H	Y	Y	T	T	Y	N	T	T	Y	Y	H	H	Y	H	Y	T	T	Y	Y	T	Y	H	Y	T	T	N	T	Y	T	T	T	T	T	N	T	Y	Y	T
S1997_11911	T/C	1997	11911	+	NA	T	T	T	Y	Y	N	Y	T	H	Y	Y	T	T	T	Y	T	Y	T	T	T	Y	T	Y	Y	T	T	T	Y	T	T	T	Y	Y	T	T	Y	T	T	T	N	T	T	T	Y
S2000_4127	G/A	2000	4127	+	NA	R	R	R	R	R	G	R	G	R	R	R	R	G	G	N	G	R	R	R	G	G	R	G	G	G	R	R	R	G	G	R	R	G	G	G	G	R	R	G	R	G	G	R	R
S2004_15627	A/G	2004	15627	+	NA	A	R	A	A	R	N	R	A	R	A	A	A	A	A	A	A	A	N	A	A	A	A	R	A	N	A	A	A	R	R	A	N	A	A	H	R	R	A	R	A	N	A	R	A
S2006_10869	C/T	2006	10869	+	NA	Y	Y	C	C	C	Y	Y	Y	Y	Y	Y	C	C	Y	C	Y	C	C	C	Y	C	C	Y	C	Y	C	Y	C	C	C	Y	C	C	C	Y	Y	C	Y	C	C	H	C	Y	Y
S2007_594	T/C	2007	594	+	NA	Y	Y	Y	Y	T	Y	Y	T	T	Y	Y	Y	Y	Y	Y	Y	Y	T	T	Y	Y	Y	T	T	Y	Y	T	T	Y	Y	T	Y	T	Y	T	T	T	Y	T	T	T	T	T	T
S2008_2703	T/G	2008	2703	+	NA	K	K	K	K	T	T	K	T	T	K	K	K	K	K	K	K	K	T	T	K	T	K	T	T	K	K	T	K	K	K	K	K	T	T	T	T	T	K	T	K	K	T	T	K
S2010_12652	G/A	2010	12652	+	NA	G	R	N	G	G	G	R	H	R	R	G	N	G	R	G	G	G	R	R	G	G	G	R	G	G	G	G	G	R	H	G	G	G	G	R	R	R	G	R	H	G	G	R	G
S2011_32104	A/C	2011	32104	+	NA	A	M	M	M	M	A	M	N	A	M	M	H	M	A	A	A	A	A	A	A	A	A	M	A	M	M	A	A	M	N	M	M	M	A	M	A	A	A	A	A	A	A	M	A
S2013_13236	C/T	2013	13236	+	NA	C	Y	C	C	Y	Y	Y	Y	N	C	Y	C	Y	C	H	Y	Y	C	Y	Y	Y	C	C	Y	Y	C	Y	Y	Y	C	C	C	C	C	C	C	C	C	C	H	N	H	Y	Y
S2020_17240	A/T	2020	17240	+	NA	A	W	W	W	W	A	W	W	A	A	W	A	W	A	W	A	A	A	A	A	W	W	W	A	W	A	A	A	W	A	W	W	A	W	W	A	A	W	W	A	A	A	A	W
S2021_9032	C/T	2021	9032	+	NA	C	Y	C	C	Y	C	Y	Y	Y	H	C	C	C	Y	C	C	C	C	C	C	C	C	Y	C	C	Y	C	C	Y	Y	C	C	C	C	Y	Y	Y	C	Y	H	C	C	Y	C
S2023_12851	G/T	2023	12851	+	NA	G	K	G	G	K	G	K	K	K	K	G	G	G	K	G	G	G	G	G	G	G	G	K	G	G	G	G	G	K	K	G	G	G	G	K	K	K	G	K	G	G	G	K	G
S2024_14841	A/T	2024	14841	+	NA	A	W	A	A	A	A	A	W	W	W	A	A	A	W	A	A	A	W	W	A	A	A	W	A	A	A	A	A	W	W	A	A	A	A	W	W	W	A	W	A	A	A	W	A
S2025_18704	T/C	2025	18704	+	NA	T	T	T	Y	Y	Y	T	T	T	Y	Y	N	T	T	T	Y	Y	T	T	T	Y	T	H	T	Y	Y	T	Y	T	T	Y	T	T	T	Y	Y	T	T	T	T	T	T	T	Y
S2026_24420	T/C	2026	24420	+	NA	Y	Y	T	Y	Y	Y	T	T	Y	T	Y	T	T	Y	T	T	T	Y	Y	T	T	T	T	T	Y	Y	Y	Y	Y	T	T	Y	Y	T	T	T	T	T	T	T	Y	Y	T	T
S2028_1541	T/G	2028	1541	+	NA	T	K	T	K	T	N	K	K	T	T	T	T	T	T	H	K	K	T	K	K	K	T	T	K	K	T	T	K	K	T	T	T	T	N	T	T	T	T	T	T	N	K	K	T
S2029_3312	C/T	2029	3312	+	NA	C	C	C	Y	Y	H	C	C	Y	Y	Y	N	C	N	H	C	Y	C	C	C	Y	C	Y	Y	C	C	C	Y	C	N	C	Y	Y	C	C	Y	C	C	C	C	N	C	Y	Y
S2030_25536	A/C	2030	25536	+	NA	M	M	M	M	A	M	M	A	M	M	M	A	A	M	A	A	A	M	M	A	A	M	A	A	M	A	M	M	A	A	A	M	M	A	A	A	M	M	A	H	M	A	M	M
S2034_19582	C/T	2034	19582	+	NA	C	C	Y	C	C	Y	C	Y	C	C	C	C	Y	C	C	C	C	C	C	Y	C	C	Y	C	C	C	Y	C	Y	C	Y	C	C	C	Y	C	C	Y	Y	C	C	C	C	Y
S2039_15637	T/A	2039	15637	+	NA	T	T	W	W	T	W	T	T	T	T	T	W	T	W	H	W	W	T	T	T	T	W	T	T	T	W	T	W	T	W	W	W	W	T	T	T	T	T	T	H	T	T	T	T
S2041_17604	G/T	2041	17604	+	NA	G	G	G	K	K	G	K	G	K	K	K	G	G	G	K	K	K	G	G	G	G	G	K	K	G	G	G	K	G	G	G	K	G	G	G	G	K	G	G	G	G	G	K	K
S2042_16033	A/C	2042	16033	+	NA	M	M	A	M	M	M	A	A	M	A	M	A	A	M	A	A	N	H	M	A	A	A	A	A	M	M	M	M	M	A	A	N	M	A	A	A	A	A	N	A	N	M	A	A
S2046_6183	G/A	2046	6183	+	NA	G	G	G	R	R	G	G	G	G	R	R	G	G	G	G	R	R	G	G	G	R	G	R	G	R	R	G	R	G	G	R	G	G	G	R	G	G	G	G	R	G	R	G	R
S2047_16755	A/C	2047	16755	+	NA	A	M	A	M	A	A	M	A	A	M	M	A	M	M	M	M	A	A	A	M	M	M	A	A	M	M	A	A	M	N	A	M	A	M	A	A	A	M	A	A	A	A	A	A
S2053_19645	T/C	2053	19645	+	NA	T	Y	Y	Y	Y	T	Y	Y	T	T	Y	T	Y	T	Y	T	T	T	T	Y	Y	Y	Y	T	Y	T	T	T	Y	T	Y	Y	T	Y	Y	T	T	Y	Y	T	T	T	T	Y
S2061_11077	T/A	2061	11077	+	NA	T	W	T	T	W	W	H	W	W	W	W	T	W	T	W	W	W	W	W	W	W	T	T	W	W	T	W	W	W	T	T	W	T	W	T	T	W	T	T	W	W	W	W	W
S2068_12576	T/A	2068	12576	+	NA	T	W	T	T	T	W	W	T	W	W	T	W	W	W	W	T	W	T	T	T	T	T	H	W	T	W	W	T	T	T	T	T	T	T	W	W	W	W	T	N	T	W	W	T
S2069_15026	A/T	2069	15026	+	NA	A	A	A	A	W	A	A	W	W	A	A	A	A	W	A	W	A	A	A	W	A	A	W	A	A	W	A	A	W	W	A	A	A	A	W	A	W	A	W	A	A	A	W	A
S2074_16850	T/C	2074	16850	+	NA	Y	T	T	Y	Y	T	Y	T	T	Y	Y	T	Y	T	T	Y	T	T	T	Y	T	Y	T	T	Y	Y	T	Y	Y	Y	T	Y	Y	T	T	T	T	Y	T	H	T	Y	T	Y
S2077_4124	T/A	2077	4124	+	NA	W	T	W	W	T	T	W	T	T	W	W	W	W	W	T	W	T	T	T	W	T	W	T	T	W	W	T	W	W	W	T	W	W	T	T	T	T	W	T	W	W	W	T	W
S2078_16771	T/A	2078	16771	+	NA	T	W	T	T	W	T	W	W	W	W	W	T	W	T	N	W	T	W	W	W	T	T	T	W	W	T	W	W	W	T	T	N	T	T	T	T	W	T	T	N	N	T	W	T
S2079_276	G/A	2079	276	+	NA	G	R	G	G	R	R	R	R	G	G	R	G	R	G	R	R	R	R	R	R	R	G	G	R	R	G	R	R	R	G	G	G	G	H	G	G	G	G	G	R	G	R	R	R
S2081_25686	A/C	2081	25686	+	NA	A	M	M	M	M	A	M	M	A	A	M	A	M	A	M	A	A	A	A	M	M	M	M	A	A	A	A	A	M	A	M	M	A	M	M	A	A	M	M	A	A	A	A	M
S2084_26066	C/T	2084	26066	+	NA	Y	Y	Y	Y	C	Y	Y	C	C	Y	C	Y	C	Y	Y	Y	Y	C	C	C	C	Y	C	C	C	C	C	Y	C	Y	Y	Y	Y	C	C	C	C	C	C	H	Y	C	C	Y
S2085_12578	G/A	2085	12578	+	NA	G	R	R	R	R	G	R	G	G	R	R	R	R	G	G	G	G	G	G	G	G	G	R	G	R	R	G	G	R	G	R	R	R	G	R	G	G	G	G	G	G	G	R	G
S2088_12428	C/A	2088	12428	+	NA	C	C	C	M	M	M	C	C	C	M	M	M	C	C	M	M	M	C	C	C	M	C	M	C	M	M	C	M	C	C	M	M	M	C	M	M	C	C	C	M	C	C	C	M
S2089_9086	C/T	2089	9086	+	NA	H	C	C	C	C	C	C	C	Y	Y	Y	C	C	H	C	Y	C	C	C	Y	C	C	Y	Y	C	C	Y	Y	C	N	Y	Y	Y	C	Y	Y	C	Y	C	C	N	C	Y	Y
S2090_12025	T/A	2090	12025	+	NA	W	W	W	W	T	T	W	T	T	W	W	W	W	W	T	W	T	T	T	W	T	W	T	T	T	W	T	W	W	W	W	W	T	T	T	T	T	W	T	T	T	T	T	W
S2095_7493	T/C	2095	7493	+	NA	T	Y	T	T	Y	T	Y	Y	Y	Y	T	T	T	Y	N	T	T	T	T	T	T	T	Y	T	T	Y	T	T	T	Y	T	N	T	T	Y	Y	Y	T	Y	T	T	T	Y	T
S2101_11365	C/T	2101	11365	+	NA	C	C	Y	C	C	Y	C	Y	C	Y	Y	Y	Y	Y	Y	Y	Y	C	C	C	Y	Y	C	C	Y	C	C	C	Y	Y	C	C	C	Y	C	C	C	Y	C	Y	C	N	C	C
S2102_6239	G/A	2102	6239	+	NA	G	R	G	G	G	G	R	G	R	R	G	R	R	R	R	G	R	R	R	G	G	G	G	R	G	R	G	G	G	G	G	N	G	G	G	G	R	R	G	G	G	G	G	G
S2105_917	C/A	2105	917	+	NA	M	C	M	C	M	C	C	M	M	M	C	M	M	M	C	C	M	C	C	C	M	M	M	C	M	C	C	C	C	C	C	M	C	M	C	C	C	M	C	C	C	C	M	M
S2112_28564	C/T	2112	28564	+	NA	C	C	Y	Y	C	Y	C	Y	C	C	Y	Y	Y	C	Y	C	C	C	C	Y	Y	C	Y	C	C	Y	Y	C	Y	C	Y	Y	C	Y	Y	C	C	Y	Y	C	C	C	C	Y
S2116_3966	C/G	2116	3966	+	NA	C	S	H	S	S	C	S	H	C	C	S	C	S	C	S	C	C	C	C	S	S	S	S	C	C	C	C	C	S	C	S	S	C	S	S	C	C	S	S	N	N	C	C	S
S2119_15759	A/G	2119	15759	+	NA	A	A	R	R	A	H	A	A	A	A	R	R	A	R	A	R	R	A	A	R	R	R	A	A	A	R	R	R	A	R	R	H	R	A	A	A	A	R	A	H	A	R	A	A
S2120_845	T/G	2120	845	+	NA	K	T	K	K	K	T	T	T	T	K	K	K	K	T	T	K	T	T	T	K	T	K	T	T	K	K	T	K	K	K	T	K	K	T	T	T	T	K	T	K	K	K	T	K
S2122_14671	G/T	2122	14671	+	NA	K	K	K	K	G	K	K	G	K	K	K	K	G	G	G	G	K	K	K	G	G	K	G	G	K	K	K	K	G	G	G	K	G	G	G	G	K	K	G	K	G	G	K	K
S2124_11974	T/G	2124	11974	+	NA	T	T	N	K	T	K	K	T	T	K	K	K	K	T	H	K	K	T	T	K	H	K	T	T	K	K	T	T	K	K	T	N	T	H	T	T	T	T	T	N	T	T	T	T
S2126_4125	T/C	2126	4125	+	NA	T	Y	T	T	Y	T	Y	Y	Y	Y	T	T	T	Y	T	T	T	T	T	T	T	T	Y	T	T	Y	T	T	Y	Y	T	T	T	T	Y	Y	Y	T	Y	N	T	T	Y	T
S2127_3355	A/G	2127	3355	+	NA	A	A	R	R	A	R	A	A	A	A	R	R	A	R	A	R	A	A	A	R	R	R	A	A	A	R	R	R	A	R	R	A	A	A	A	A	A	R	A	A	A	R	A	A
S2131_8610	G/A	2131	8610	+	NA	G	G	R	G	G	R	G	R	G	G	G	R	R	G	G	G	G	N	G	R	G	G	G	G	G	R	R	G	R	G	R	R	G	G	R	G	G	R	R	G	G	G	G	R
S2134_17119	A/C	2134	17119	+	NA	M	A	M	M	A	A	M	A	A	M	M	A	H	M	N	M	A	A	A	M	A	M	A	A	A	H	A	M	M	M	M	H	A	A	A	A	A	M	A	N	N	A	A	A
S2135_16647	A/G	2135	16647	+	NA	A	A	A	R	R	R	R	A	H	R	R	H	A	A	A	A	R	N	A	A	R	A	R	R	A	R	A	R	A	A	H	N	R	A	R	R	N	A	A	A	N	N	A	R
S2138_13618	G/A	2138	13618	+	NA	G	R	R	R	R	R	R	R	G	G	R	G	R	G	R	G	G	G	G	R	R	R	R	G	G	G	G	G	R	G	R	R	G	R	R	G	G	R	R	G	G	G	G	R
S2139_9363	C/T	2139	9363	+	NA	C	Y	H	Y	Y	Y	Y	Y	C	C	Y	Y	Y	C	Y	C	C	C	C	Y	Y	C	Y	C	C	C	C	C	Y	C	Y	Y	C	Y	Y	C	C	Y	Y	N	C	C	C	Y
S2140_11865	T/C	2140	11865	+	NA	T	Y	Y	Y	T	Y	Y	Y	T	T	Y	N	Y	T	Y	T	T	T	T	Y	Y	Y	T	T	T	T	T	T	Y	T	H	H	T	Y	Y	T	T	Y	T	T	T	T	T	Y
S2143_19349	C/T	2143	19349	+	NA	C	Y	C	C	C	C	Y	C	Y	Y	C	Y	C	Y	Y	C	Y	Y	Y	C	C	C	C	Y	C	Y	C	C	C	C	C	C	C	C	C	C	Y	Y	C	C	C	Y	C	C
S2146_11112	G/A	2146	11112	+	NA	G	G	G	R	R	R	G	G	G	R	R	R	G	G	R	G	R	G	G	G	R	G	R	G	R	R	G	R	G	G	R	R	R	G	R	R	G	G	G	R	G	G	G	R
S2147_19160	C/G	2147	19160	+	NA	C	C	S	S	C	S	C	C	C	C	S	S	C	S	C	S	S	C	C	C	S	S	C	C	C	S	S	S	C	S	S	S	S	C	C	C	C	S	C	S	C	S	C	C
S2148_8957	A/G	2148	8957	+	NA	R	R	H	R	A	A	R	A	A	H	R	N	R	A	R	R	R	A	A	R	A	R	A	A	R	A	A	R	R	N	H	A	A	A	A	A	A	A	A	A	N	A	A	A
S2150_11367	G/T	2150	11367	+	NA	G	K	G	K	K	K	K	K	G	G	K	G	G	G	H	K	G	G	K	K	K	G	G	K	G	G	K	K	K	G	G	G	G	K	G	G	G	G	G	K	G	K	K	K
S2153_13661	C/A	2153	13661	+	NA	C	H	N	C	M	C	M	M	M	M	M	C	M	C	M	M	H	M	M	M	M	C	C	M	C	C	M	C	H	C	C	N	C	H	C	C	M	C	C	C	M	M	M	M
S2154_32188	A/G	2154	32188	+	NA	A	A	A	R	R	R	R	A	H	R	R	A	A	A	A	R	R	A	A	A	A	A	H	R	A	A	A	R	A	A	A	A	R	A	A	R	R	A	A	N	A	A	R	R
S2156_6888	A/C	2156	6888	+	NA	M	A	M	M	M	A	M	A	A	M	M	M	M	A	A	M	A	A	A	M	A	M	A	A	M	M	A	M	M	M	A	M	M	A	A	A	A	M	A	M	M	M	A	M
S2158_6341	A/G	2158	6341	+	NA	A	A	R	R	A	R	R	A	A	R	A	R	A	R	R	R	R	A	A	A	A	R	A	A	A	R	A	R	A	R	R	R	R	A	A	A	A	A	A	R	R	A	A	H
S2159_8491	T/C	2159	8491	+	NA	T	T	T	T	Y	T	T	Y	Y	T	T	T	T	Y	T	Y	T	T	T	Y	T	T	Y	T	T	Y	T	T	Y	Y	T	T	T	T	Y	T	Y	T	Y	N	N	T	Y	T
S2161_1577	T/G	2161	1577	+	NA	T	K	T	T	K	T	K	K	T	T	K	T	K	T	H	K	K	K	K	K	K	T	T	H	T	T	K	K	K	T	T	H	T	H	T	T	T	T	T	K	T	K	K	T
S2162_11261	G/C	2162	11261	+	NA	G	S	S	S	S	G	S	G	G	G	S	S	S	G	G	G	G	G	G	G	G	G	S	G	S	S	G	G	S	G	S	S	S	G	S	G	G	G	G	G	S	G	S	G
S2165_12524	C/T	2165	12524	+	NA	C	Y	C	C	C	C	Y	Y	H	Y	C	C	C	Y	C	C	C	Y	Y	C	C	C	Y	C	C	C	C	C	Y	C	C	C	C	C	H	Y	Y	C	Y	Y	C	C	Y	C
S2166_14136	C/T	2166	14136	+	NA	C	C	Y	Y	C	Y	C	C	C	C	Y	Y	C	Y	Y	Y	Y	C	C	C	C	Y	C	C	C	Y	Y	Y	C	Y	Y	Y	Y	C	C	C	C	C	C	Y	C	Y	C	C
S2168_9232	A/G	2168	9232	+	NA	R	R	R	R	A	H	R	A	A	R	A	R	A	R	R	R	R	A	A	A	A	R	A	A	A	R	A	R	A	R	R	R	R	A	A	A	A	A	A	R	R	A	A	R
S2170_17823	A/G	2170	17823	+	NA	R	A	H	A	R	A	A	R	R	A	A	R	R	A	A	A	H	A	A	A	R	R	R	A	R	A	A	A	R	R	A	R	R	N	A	A	A	A	A	A	H	A	R	R
S2172_5373	G/C	2172	5373	+	NA	G	S	G	G	G	G	S	G	S	S	G	N	S	S	H	G	S	H	S	G	G	G	S	S	G	G	S	G	G	G	G	N	G	G	S	H	G	S	G	G	G	S	S	G
S2183_6989	C/G	2183	6989	+	NA	C	C	C	S	S	C	C	C	S	S	S	C	C	C	S	C	C	C	C	C	S	C	S	S	C	C	C	S	C	C	C	S	S	C	C	S	C	C	C	C	C	C	S	S
S2186_14670	A/G	2186	14670	+	NA	A	A	R	R	A	R	R	R	A	A	R	A	R	A	R	A	A	N	A	R	R	A	A	A	A	R	R	A	H	A	R	A	A	R	R	A	A	R	R	A	A	A	A	R
S2188_383	C/T	2188	383	+	NA	C	Y	Y	Y	Y	C	Y	C	C	Y	Y	Y	Y	C	C	C	C	C	C	C	C	C	Y	C	Y	Y	C	C	Y	Y	Y	Y	Y	C	Y	C	C	C	C	C	Y	C	Y	C
S2190_9353	A/C	2190	9353	+	NA	A	M	A	A	M	A	M	M	M	M	A	A	A	M	A	A	A	A	A	A	A	A	M	A	A	A	A	A	M	A	A	A	A	A	M	M	M	A	M	A	A	A	M	A
S2200_16232	C/T	2200	16232	+	NA	Y	Y	C	C	Y	C	C	C	Y	Y	Y	C	C	Y	C	Y	C	C	C	Y	C	C	Y	Y	Y	C	Y	Y	C	C	Y	C	Y	C	Y	Y	C	Y	C	C	H	C	Y	Y
S2201_5312	C/T	2201	5312	+	NA	C	H	Y	Y	Y	N	Y	Y	C	C	Y	C	Y	C	Y	C	C	C	C	C	Y	Y	Y	C	Y	C	C	Y	Y	C	Y	Y	C	Y	Y	C	C	Y	C	N	C	C	C	Y
S2202_13577	A/C	2202	13577	+	NA	M	H	M	M	A	M	M	A	M	M	M	M	A	A	A	A	M	M	M	A	A	M	A	A	M	M	M	M	A	A	A	M	A	A	A	A	H	M	A	A	A	A	M	M
S2206_3914	C/T	2206	3914	+	NA	C	Y	C	C	C	C	Y	C	Y	Y	C	C	C	Y	C	C	C	Y	Y	C	C	C	Y	C	C	C	C	C	Y	Y	C	C	C	C	Y	Y	Y	C	Y	Y	C	C	Y	C
S2210_19938	C/T	2210	19938	+	NA	C	Y	Y	Y	C	C	Y	C	C	Y	Y	Y	Y	Y	H	Y	Y	C	C	H	Y	Y	C	C	H	Y	C	C	H	C	C	H	C	Y	C	C	C	Y	C	C	N	C	C	C
S2211_10850	A/G	2211	10850	+	NA	R	A	H	A	R	A	A	R	R	R	A	R	R	R	A	A	R	N	A	A	R	R	N	A	R	A	A	A	R	R	A	A	R	A	A	A	A	A	A	N	H	A	R	R
S2212_16837	A/C	2212	16837	+	NA	A	A	A	A	M	A	M	M	M	M	A	A	A	M	A	A	A	A	A	M	A	A	M	A	A	M	A	A	M	M	A	A	A	A	M	A	M	A	M	H	A	A	M	A
S2214_8204	A/G	2214	8204	+	NA	R	R	A	R	R	A	A	A	R	A	R	A	A	R	A	A	A	A	R	A	A	A	R	A	A	R	R	R	R	A	R	R	H	A	A	R	A	A	A	A	N	A	R	A
S2216_19934	T/C	2216	19934	+	NA	T	T	Y	T	T	Y	T	T	T	Y	Y	Y	Y	Y	T	Y	T	T	T	T	Y	Y	T	T	Y	T	T	T	Y	Y	T	T	T	Y	T	T	T	Y	T	N	N	T	T	T
S2222_13699	A/T	2222	13699	+	NA	A	A	W	W	A	H	A	A	A	A	W	W	A	W	W	W	W	A	A	A	W	W	A	A	A	W	W	W	A	A	W	W	A	A	A	A	A	W	A	A	A	W	A	A
S2223_13920	T/G	2223	13920	+	NA	K	K	K	K	K	K	K	T	K	K	K	T	T	T	T	T	K	K	K	T	T	K	T	T	K	K	K	K	T	T	K	K	T	T	T	T	K	K	T	K	T	T	K	K
S2224_3049	C/T	2224	3049	+	NA	Y	Y	C	Y	C	C	Y	C	Y	C	C	C	C	Y	C	C	Y	Y	Y	C	C	Y	C	C	Y	C	Y	Y	Y	C	C	Y	Y	C	C	C	Y	Y	C	Y	Y	C	C	C
S2229_7592	A/G	2229	7592	+	NA	A	A	R	R	A	R	R	R	A	A	R	A	R	A	R	A	A	A	A	R	R	A	R	A	A	R	R	A	R	A	R	R	A	R	R	A	A	R	R	A	A	A	A	R
S2230_3102	C/T	2230	3102	+	NA	H	Y	Y	Y	C	C	Y	C	C	Y	Y	H	Y	Y	C	Y	C	C	C	Y	C	Y	C	C	Y	Y	C	Y	Y	Y	Y	H	C	C	C	C	C	Y	C	N	Y	N	C	Y
S2231_3522	A/T	2231	3522	+	NA	A	W	A	A	A	A	W	W	W	W	A	A	A	W	A	A	A	W	W	A	A	A	W	A	A	A	A	A	W	W	A	A	A	A	W	W	W	A	W	W	A	A	W	A
S2234_23220	G/A	2234	23220	+	NA	R	G	R	G	R	R	G	G	R	G	G	G	R	R	R	G	G	G	G	G	G	R	R	R	R	G	G	G	R	G	G	R	G	G	R	R	G	R	R	G	G	R	R	G
S2235_13340	T/A	2235	13340	+	NA	W	T	W	T	W	T	T	W	W	W	T	W	W	W	T	T	T	T	T	T	W	W	W	T	W	T	T	T	T	T	T	W	T	W	T	T	T	W	W	T	T	T	W	T
S2244_23887	C/T	2244	23887	+	NA	C	C	C	Y	Y	Y	C	C	Y	Y	Y	C	C	C	Y	C	Y	C	C	C	Y	C	Y	Y	C	C	C	Y	C	C	C	N	Y	C	C	Y	C	C	C	C	C	C	Y	Y
S2245_11312	G/A	2245	11312	+	NA	R	R	G	R	G	G	R	G	R	G	G	G	G	R	G	G	R	R	R	G	G	R	G	G	R	G	R	R	R	G	G	R	R	G	G	G	R	R	G	R	R	G	G	G
S2252_9722	T/A	2252	9722	+	NA	W	W	T	W	W	T	T	T	W	T	W	W	T	W	T	T	T	T	W	T	T	T	W	N	W	W	W	W	W	T	T	H	W	T	T	W	T	T	T	N	H	T	T	T
S2253_12515	T/G	2253	12515	+	NA	T	K	T	K	K	K	H	H	T	T	K	T	T	T	T	K	N	K	H	K	K	T	T	H	K	T	K	K	K	T	T	N	T	K	T	T	T	T	T	N	N	K	T	T
S2256_4489	A/C	2256	4489	+	NA	M	M	A	M	A	A	M	A	M	M	M	A	A	M	A	A	A	H	M	A	A	M	A	A	A	A	M	M	M	A	A	M	M	A	A	A	M	M	A	A	M	A	M	M
S2258_13840	T/C	2258	13840	+	NA	T	Y	Y	Y	Y	T	Y	Y	T	T	Y	T	Y	T	Y	T	T	T	T	Y	Y	Y	Y	T	T	T	T	T	Y	T	Y	Y	T	Y	Y	T	T	Y	Y	T	T	T	T	Y
S2260_24126	T/C	2260	24126	+	NA	T	Y	T	T	T	Y	Y	T	Y	Y	T	Y	Y	Y	T	T	Y	T	Y	T	T	T	Y	Y	T	Y	T	T	T	T	T	T	T	T	Y	Y	T	Y	T	N	T	Y	Y	T
S2261_17607	T/C	2261	17607	+	NA	T	T	Y	Y	Y	T	Y	Y	T	T	Y	T	Y	T	N	T	N	T	T	T	Y	Y	Y	T	Y	T	T	Y	Y	T	Y	T	T	T	Y	T	T	Y	Y	N	T	T	T	T
S2262_8517	T/A	2262	8517	+	NA	W	T	W	W	W	W	W	T	W	W	W	T	T	T	T	T	T	W	W	T	T	W	T	T	T	W	W	W	T	T	W	W	T	T	T	T	W	W	T	N	T	T	W	W
S2265_21796	G/T	2265	21796	+	NA	G	G	G	K	K	G	K	G	K	K	K	G	G	G	G	G	K	G	G	G	K	G	K	N	G	G	G	K	G	G	G	H	K	G	G	K	G	G	G	K	G	G	G	K
S2269_18000	T/C	2269	18000	+	NA	Y	Y	T	T	T	Y	Y	T	Y	Y	Y	T	T	Y	T	Y	T	T	T	Y	T	T	Y	Y	Y	T	Y	T	T	T	Y	T	Y	T	T	Y	T	Y	T	T	H	N	Y	Y
S2270_21000	C/T	2270	21000	+	NA	C	Y	C	C	C	C	Y	Y	Y	Y	C	C	C	Y	C	C	C	Y	Y	C	C	C	Y	C	C	C	C	C	Y	Y	C	C	C	C	Y	Y	Y	C	Y	Y	C	C	Y	C
S2271_15465	A/G	2271	15465	+	NA	A	R	A	A	R	A	R	H	R	R	R	H	R	N	R	R	R	R	R	A	R	A	A	R	R	A	R	R	R	A	A	N	R	H	A	A	R	A	A	N	A	R	R	H
S2273_18161	T/G	2273	18161	+	NA	T	T	T	K	K	K	T	T	K	K	K	T	T	T	K	T	K	T	T	T	K	T	K	K	T	T	T	K	T	T	T	N	T	T	T	T	T	T	T	H	T	T	K	K
S2280_9969	G/T	2280	9969	+	NA	G	G	G	G	K	G	K	K	K	K	G	G	G	K	G	G	G	G	G	G	G	G	K	G	G	K	G	G	K	H	G	G	G	G	K	G	K	G	K	K	G	G	K	G
S2281_9103	T/C	2281	9103	+	NA	T	Y	T	T	Y	Y	Y	Y	Y	Y	Y	T	Y	T	Y	Y	Y	Y	Y	Y	Y	T	T	Y	Y	T	Y	Y	Y	T	T	H	T	Y	T	T	Y	T	T	H	Y	Y	Y	Y
S2283_1199	T/C	2283	1199	+	NA	T	T	T	Y	Y	Y	T	T	T	Y	Y	Y	T	T	T	Y	Y	T	T	T	Y	T	Y	T	Y	Y	T	Y	T	T	Y	T	T	T	Y	Y	T	T	T	H	T	Y	T	Y
S2284_22277	T/C	2284	22277	+	NA	Y	Y	Y	Y	T	T	H	T	T	Y	Y	H	Y	Y	T	Y	T	T	T	H	T	Y	T	T	Y	H	T	Y	Y	Y	H	T	T	T	T	T	T	Y	T	T	N	T	T	Y
S2285_8100	G/A	2285	8100	+	NA	R	G	R	G	R	G	G	R	R	G	G	R	R	R	N	G	G	G	G	G	G	R	R	G	R	G	G	G	R	R	G	N	G	R	G	G	G	R	R	N	H	G	R	G
S2287_15098	A/T	2287	15098	+	NA	A	W	A	A	W	W	W	W	A	A	W	A	W	A	A	W	W	W	W	W	W	A	A	W	W	A	W	W	W	A	A	W	A	W	A	A	A	A	A	W	A	A	W	W
S2288_22176	G/T	2288	22176	+	NA	G	G	G	K	K	K	K	G	K	K	K	G	G	G	G	G	K	G	G	G	K	G	K	K	G	G	G	K	G	G	G	K	K	G	G	K	G	G	G	K	G	G	G	G
S2291_42726	C/T	2291	42726	+	NA	Y	Y	C	C	Y	C	C	C	Y	Y	Y	C	C	Y	C	Y	C	C	C	Y	C	C	Y	H	Y	C	Y	Y	C	C	Y	Y	Y	C	Y	Y	C	Y	C	N	H	C	Y	C
S2294_5086	C/G	2294	5086	+	NA	C	S	C	C	C	C	C	C	S	S	C	S	C	S	S	C	S	S	S	C	S	C	C	S	C	S	C	C	C	C	C	N	S	S	C	C	S	S	C	C	N	S	C	C
S2296_20321	A/C	2296	20321	+	NA	A	M	M	M	M	M	M	M	A	A	M	A	M	A	M	A	A	A	A	M	M	A	M	A	A	A	A	A	M	A	M	A	A	H	M	A	A	M	M	A	A	A	A	M
S2297_10227	A/T	2297	10227	+	NA	A	W	W	W	A	A	W	A	A	A	W	N	W	A	A	A	A	A	A	A	A	A	W	A	H	W	A	A	W	A	W	W	W	A	W	A	A	A	A	A	H	A	A	N
S2298_17225	G/A	2298	17225	+	NA	G	R	R	R	R	R	R	R	G	G	R	G	R	G	R	G	G	G	G	R	R	R	R	G	G	G	G	G	R	G	R	R	G	R	R	G	G	R	R	G	G	G	G	R
S2302_13786	G/A	2302	13786	+	NA	G	R	R	R	R	G	R	G	G	G	R	R	R	G	G	G	G	G	G	G	G	G	R	G	R	R	G	G	R	G	R	G	R	G	G	G	G	G	G	G	R	G	R	G
S2305_99	T/A	2305	99	+	NA	W	W	T	W	W	T	T	T	W	T	W	H	T	W	T	T	T	H	T	T	T	T	W	T	W	W	W	H	W	T	T	W	W	T	T	W	T	T	T	T	H	T	T	T
S2306_4723	T/C	2306	4723	+	NA	T	Y	T	T	Y	T	Y	T	Y	Y	Y	N	T	T	T	Y	H	N	T	T	T	T	Y	Y	T	T	T	Y	T	T	T	Y	T	T	T	T	Y	T	Y	N	N	N	Y	T
S2308_378	T/C	2308	378	+	NA	T	T	Y	Y	T	H	T	T	T	T	T	Y	T	Y	H	Y	Y	T	T	T	T	Y	T	T	T	Y	Y	Y	T	Y	Y	N	Y	T	T	T	T	T	T	H	T	Y	T	T
S2309_2028	G/C	2309	2028	+	NA	G	G	H	S	G	S	G	S	G	G	S	S	S	G	S	G	G	G	G	S	G	G	S	G	G	S	S	G	S	G	S	H	G	G	S	G	G	S	S	N	G	G	G	H
S2310_27626	C/G	2310	27626	+	NA	S	C	S	S	C	S	S	C	C	H	C	S	C	S	C	S	S	C	C	C	C	S	C	C	C	S	C	S	C	S	S	S	S	C	C	C	C	C	C	H	H	C	C	S
S2312_3077	A/G	2312	3077	+	NA	A	R	A	A	A	A	R	A	R	R	A	R	R	R	R	A	R	R	R	A	A	A	R	R	A	R	A	A	A	A	A	A	A	A	R	R	R	R	A	A	A	R	R	A
S2313_7402	A/G	2313	7402	+	NA	R	R	R	R	A	A	R	A	A	R	R	R	R	R	R	R	R	A	A	R	R	R	A	A	R	R	A	A	R	R	R	R	A	R	A	A	A	R	A	R	A	A	A	A
S2314_14700	A/G	2314	14700	+	NA	A	R	A	A	A	A	A	A	R	R	A	R	A	R	R	A	R	R	R	A	R	A	A	R	A	R	A	A	A	A	A	A	R	R	A	A	R	R	A	A	N	R	A	A
S2315_3191	T/C	2315	3191	+	NA	Y	Y	T	Y	Y	T	T	T	Y	T	Y	H	T	T	T	T	T	Y	Y	T	T	T	Y	T	Y	Y	Y	Y	Y	T	Y	N	Y	T	T	T	T	T	T	N	H	T	Y	T
S2319_18347	G/C	2319	18347	+	NA	G	S	G	G	S	S	S	H	S	S	S	H	H	G	G	S	S	S	S	G	S	G	G	S	H	G	S	S	S	G	G	S	S	G	G	G	S	G	G	H	G	S	G	S
S2320_23079	A/C	2320	23079	+	NA	A	M	A	A	A	A	M	A	M	M	M	A	A	M	A	M	M	N	A	M	A	A	M	M	M	A	M	A	A	A	A	N	A	A	M	M	A	M	A	N	N	M	M	M
S2321_11185	C/G	2321	11185	+	NA	S	S	C	C	C	C	C	C	S	S	S	C	C	S	C	S	C	C	C	S	C	C	S	S	S	C	S	S	C	C	S	S	S	C	S	S	C	S	C	C	S	C	S	S
S2325_15568	T/C	2325	15568	+	NA	Y	Y	T	Y	Y	T	T	T	Y	T	Y	Y	T	T	T	T	T	T	T	T	T	T	Y	T	Y	Y	Y	Y	Y	T	Y	Y	Y	T	T	T	T	T	T	T	Y	T	Y	T
S2326_3361	A/G	2326	3361	+	NA	R	R	R	R	A	R	R	A	H	R	R	A	A	R	A	A	A	R	R	A	A	R	A	A	R	A	R	R	A	A	A	A	R	A	A	A	A	R	A	A	A	A	R	R
S2327_11749	T/C	2327	11749	+	NA	T	T	Y	Y	T	Y	Y	T	T	Y	T	Y	T	Y	Y	Y	Y	T	T	T	T	Y	T	T	T	Y	T	Y	T	Y	Y	Y	Y	T	T	T	T	T	T	Y	Y	T	T	T
S2330_20730	A/G	2330	20730	+	NA	A	R	H	R	R	A	R	A	A	A	R	A	R	A	A	A	A	A	A	A	A	A	R	A	R	R	A	A	R	A	R	H	R	A	R	A	A	A	A	N	R	A	R	A
S2331_17889	A/T	2331	17889	+	NA	A	W	A	W	W	W	W	W	A	A	W	A	A	A	W	W	W	W	W	W	W	A	A	W	W	A	W	W	W	A	A	A	A	W	A	A	A	A	A	W	A	W	W	A
S2332_2816	T/A	2332	2816	+	NA	T	T	T	T	W	T	W	W	W	W	T	T	T	W	T	T	T	T	T	W	T	T	W	T	T	W	T	T	W	W	T	T	T	T	W	W	W	T	W	T	N	T	W	T
S2333_539	A/G	2333	539	+	NA	A	A	R	A	A	R	R	A	A	R	R	R	R	R	R	R	R	A	A	R	R	R	A	A	R	A	A	A	R	R	A	A	A	R	A	A	A	R	A	R	A	A	A	A
S2338_12561	C/T	2338	12561	+	NA	C	C	Y	Y	C	Y	C	C	C	C	Y	Y	C	Y	Y	Y	Y	C	C	C	C	Y	C	C	C	Y	Y	Y	C	Y	Y	Y	Y	C	C	C	C	C	C	Y	C	Y	C	C
S2339_38527	A/C	2339	38527	+	NA	A	A	M	A	M	A	A	M	A	M	A	M	M	M	M	M	M	A	A	A	M	M	A	A	A	A	A	A	M	M	A	A	A	M	A	A	A	M	A	H	N	A	A	A
S2341_4725	A/G	2341	4725	+	NA	A	A	A	R	H	N	A	A	R	R	R	A	A	A	N	A	R	A	A	A	R	A	R	R	A	A	A	R	A	A	A	N	H	A	A	R	A	A	A	A	A	A	R	R
S2344_6507	G/A	2344	6507	+	NA	R	R	R	R	G	G	R	G	G	R	R	R	R	R	G	R	G	G	G	R	G	R	G	G	R	R	G	R	R	R	R	N	G	G	G	G	G	R	G	G	R	G	G	R
S2347_13556	A/G	2347	13556	+	NA	R	A	R	A	R	A	R	A	R	A	A	A	R	R	R	A	A	A	A	A	A	R	R	R	R	A	A	A	R	A	A	R	A	A	A	A	A	R	R	A	A	A	R	A
S2348_2464	C/T	2348	2464	+	NA	Y	Y	C	Y	C	Y	Y	C	C	Y	C	Y	C	Y	H	Y	Y	C	C	C	C	Y	C	C	C	Y	C	Y	C	Y	Y	C	Y	C	C	C	C	C	C	N	H	C	C	Y
S2349_3880	A/C	2349	3880	+	NA	M	M	M	M	A	M	M	A	A	M	A	M	A	M	M	M	M	A	A	A	A	M	A	A	A	M	A	M	A	M	M	H	M	A	A	A	A	A	A	N	M	A	A	M
S2350_15641	T/C	2350	15641	+	NA	Y	T	Y	T	Y	T	T	N	Y	Y	T	H	Y	Y	T	T	T	T	T	T	Y	Y	Y	T	Y	T	T	T	Y	Y	T	T	Y	Y	T	T	T	Y	T	N	T	T	Y	Y
S2351_8743	T/C	2351	8743	+	NA	Y	Y	T	Y	Y	T	T	T	Y	T	Y	Y	T	Y	T	T	T	Y	Y	T	T	T	H	T	Y	Y	Y	Y	Y	T	T	H	Y	T	T	Y	T	T	T	T	Y	T	T	T
S2352_3780	T/A	2352	3780	+	NA	T	W	T	T	T	T	W	T	W	T	T	W	T	W	W	T	W	W	W	T	T	T	T	W	T	W	T	T	T	T	T	T	T	T	T	T	W	W	T	N	T	W	T	T
S2355_11885	T/C	2355	11885	+	NA	T	Y	Y	Y	Y	T	Y	T	T	T	Y	T	Y	T	T	T	T	T	T	T	T	T	Y	T	Y	Y	T	T	Y	T	Y	Y	Y	T	Y	T	T	T	T	T	N	T	Y	T
S2356_18482	C/T	2356	18482	+	NA	C	Y	Y	Y	Y	C	Y	Y	C	C	Y	C	Y	C	Y	C	C	C	C	Y	Y	Y	Y	C	Y	C	C	C	Y	C	Y	Y	C	Y	Y	C	C	Y	Y	C	C	C	C	Y
S2357_3357	G/C	2357	3357	+	NA	G	G	G	S	S	S	G	G	G	G	S	H	G	G	G	S	G	G	G	G	S	G	S	G	S	S	G	S	G	G	S	G	G	G	G	S	G	S	G	G	G	S	G	S
S2360_6375	C/T	2360	6375	+	NA	Y	Y	C	C	Y	C	C	C	Y	Y	Y	C	C	Y	C	Y	C	C	C	Y	C	C	Y	C	C	C	Y	Y	Y	C	H	N	C	N	Y	Y	C	Y	C	C	N	C	Y	Y
S2361_22682	A/G	2361	22682	+	NA	A	R	A	A	A	A	R	A	A	R	R	A	A	R	A	R	H	A	A	A	A	A	R	A	R	A	R	A	A	A	R	N	A	A	R	R	A	R	A	A	A	A	R	A
S2362_12696	A/G	2362	12696	+	NA	A	R	A	R	R	A	R	A	A	A	R	R	R	A	A	A	A	A	A	A	A	A	R	A	R	R	A	A	R	A	R	H	R	A	A	A	A	A	A	N	A	A	R	A
S2363_5924	A/T	2363	5924	+	NA	W	W	W	W	A	A	W	A	A	W	W	W	W	W	A	W	A	A	A	W	A	W	A	A	W	W	A	W	W	W	W	A	A	A	A	A	A	W	A	W	W	A	A	W
S2365_15683	G/T	2365	15683	+	NA	G	K	K	K	G	G	K	G	G	K	K	G	K	K	G	K	G	G	G	K	G	K	G	G	K	K	G	K	K	K	K	G	G	G	G	G	G	K	G	G	K	G	G	K
S2366_14293	C/G	2366	14293	+	NA	S	S	C	C	C	S	S	C	S	S	S	C	C	S	C	S	C	C	C	S	C	C	S	S	S	C	S	C	C	C	S	C	S	C	S	H	C	S	C	N	S	C	H	S
S2369_22229	A/G	2369	22229	+	NA	R	R	A	A	A	H	R	A	R	R	R	A	A	R	A	R	A	A	A	R	A	A	R	R	R	A	R	A	A	A	R	A	H	A	A	R	A	A	A	N	H	N	R	R
S2370_10731	T/G	2370	10731	+	NA	K	T	H	T	K	K	H	T	K	T	T	T	K	K	N	T	T	T	T	T	K	K	K	T	T	T	T	T	T	T	T	K	T	K	T	T	T	K	K	N	H	T	K	T
S2371_101	A/G	2371	101	+	NA	A	R	A	A	R	H	R	R	R	R	A	A	R	A	H	R	A	A	R	A	H	A	A	R	R	A	R	R	R	A	A	N	A	R	A	A	R	A	A	N	A	N	R	R
S2374_6137	A/T	2374	6137	+	NA	W	A	W	A	W	A	A	A	W	W	A	H	W	W	A	A	W	A	A	A	W	W	W	A	W	A	A	A	W	W	A	N	W	W	A	A	A	W	A	N	W	A	W	A
S2384_12182	G/A	2384	12182	+	NA	R	G	R	G	R	G	G	R	R	R	G	R	R	R	G	G	G	G	G	G	R	R	R	G	R	G	G	G	R	R	G	R	G	R	G	G	G	R	R	R	R	G	R	G
S2385_11896	C/T	2385	11896	+	NA	Y	C	Y	Y	C	C	Y	C	C	Y	Y	Y	Y	Y	H	Y	Y	C	C	Y	C	Y	C	C	Y	Y	C	Y	C	Y	Y	Y	C	C	C	C	C	Y	C	C	N	C	C	Y
S2388_6560	G/T	2388	6560	+	NA	K	K	G	G	G	H	G	G	K	K	K	G	G	H	G	K	G	G	G	K	G	G	K	K	K	G	K	G	G	G	K	G	K	G	K	K	G	K	G	G	H	G	K	K
S2392_21291	A/T	2392	21291	+	NA	W	W	W	W	A	A	W	A	A	W	W	W	W	W	A	W	W	A	A	W	A	W	A	A	W	W	A	W	W	W	W	W	A	A	A	A	A	W	A	A	A	A	A	W
S2393_6077	T/A	2393	6077	+	NA	T	W	T	W	W	T	T	T	W	H	W	T	T	T	T	W	W	T	T	T	T	T	W	W	T	T	T	W	T	T	T	W	T	T	T	T	W	T	W	T	T	T	W	T
S2400_15098	C/A	2400	15098	+	NA	M	M	M	M	M	H	M	C	M	M	M	M	C	M	C	C	M	M	M	C	C	M	C	C	C	M	M	M	C	C	M	M	C	C	C	C	M	M	C	C	C	C	M	M
S2402_9392	G/T	2402	9392	+	NA	K	K	K	K	G	K	K	G	G	K	G	K	G	K	K	K	K	G	G	G	G	K	G	G	G	K	G	K	G	K	K	K	K	G	G	G	G	G	G	K	K	G	G	K
S2405_9698	T/G	2405	9698	+	NA	K	T	T	T	K	T	K	T	K	T	T	K	T	T	T	K	T	T	T	T	K	K	T	T	K	K	K	K	K	K	T	T	K	T	T	T	T	K	T	H	T	T	T	K
S2412_31818	G/A	2412	31818	+	NA	G	R	G	G	R	R	R	R	R	H	R	G	R	G	R	R	R	R	R	R	R	G	G	R	R	G	R	R	R	G	G	G	G	R	G	G	R	G	G	R	N	R	R	R
S2418_3170	A/T	2418	3170	+	NA	W	A	A	A	W	A	W	A	W	W	A	W	A	A	A	W	A	A	A	A	W	W	A	A	W	W	A	W	A	W	W	W	W	N	A	A	A	W	A	H	A	A	A	H
S2420_2855	G/T	2420	2855	+	NA	K	K	K	K	G	G	K	G	G	K	K	K	K	K	K	K	K	G	G	K	G	K	G	G	K	K	G	G	K	K	G	K	G	G	G	G	G	K	G	K	G	G	G	G
S2431_27096	G/A	2431	27096	+	NA	G	R	G	G	G	R	R	G	R	G	G	R	R	R	G	G	R	G	G	G	G	G	R	R	G	G	R	G	G	G	G	G	G	G	R	R	R	R	G	N	N	H	R	G
S2433_30735	T/C	2433	30735	+	NA	Y	T	Y	Y	T	T	Y	T	T	Y	Y	Y	Y	T	T	Y	T	T	T	Y	T	Y	T	T	Y	Y	T	Y	Y	T	Y	H	T	T	T	T	T	Y	T	N	H	Y	T	Y
S2434_7019	A/T	2434	7019	+	NA	A	A	A	W	W	W	A	A	A	W	W	W	A	A	W	W	W	A	A	A	W	A	W	A	W	W	A	W	A	A	W	W	W	A	W	W	A	A	A	W	A	A	A	W
S2435_19085	T/G	2435	19085	+	NA	T	T	K	T	T	K	K	T	T	K	K	K	K	K	K	K	K	T	T	K	K	K	T	T	K	T	T	T	K	K	T	K	T	T	T	T	T	K	T	H	T	T	T	T
S2457_4441	T/C	2457	4441	+	NA	T	Y	T	T	T	T	T	T	Y	Y	T	Y	T	Y	Y	T	Y	Y	Y	T	Y	T	T	Y	T	Y	T	T	T	T	T	T	Y	Y	T	T	Y	Y	T	T	T	Y	T	T
S2458_10600	C/G	2458	10600	+	NA	S	H	H	S	N	N	S	C	C	S	S	C	S	S	C	S	C	C	C	S	C	S	C	C	S	S	C	S	S	S	C	C	C	C	C	C	C	S	C	N	C	C	C	C
S2460_5517	A/C	2460	5517	+	NA	A	A	A	M	A	M	M	A	M	M	M	A	A	A	M	A	M	A	A	A	M	A	M	M	A	A	A	M	A	A	M	M	A	A	A	M	A	A	A	A	A	A	A	M
S2462_8316	T/C	2462	8316	+	NA	Y	H	T	T	Y	T	T	T	Y	Y	Y	T	T	Y	T	Y	T	N	T	Y	T	T	Y	T	H	T	Y	Y	Y	T	Y	T	Y	T	Y	Y	T	Y	T	T	H	T	Y	H
S2463_19715	A/T	2463	19715	+	NA	W	A	W	A	W	A	A	W	W	W	A	A	W	W	A	A	A	A	A	A	W	W	W	A	W	A	A	A	W	W	A	W	A	W	A	A	A	W	W	W	W	A	W	A
S2473_20428	T/A	2473	20428	+	NA	W	W	W	W	T	T	W	T	T	W	W	H	W	H	W	W	W	T	T	W	T	W	T	T	W	H	T	W	W	H	W	T	T	T	T	T	T	W	T	N	H	T	T	W
S2476_5048	G/A	2476	5048	+	NA	G	G	R	G	G	R	G	R	G	G	G	R	R	G	R	G	G	G	G	R	G	G	R	G	G	R	R	G	R	G	R	R	G	G	R	G	G	R	R	G	G	G	G	R
S2478_10268	A/G	2478	10268	+	NA	A	R	A	A	A	H	R	A	R	R	A	R	R	R	R	A	R	N	R	A	A	A	R	R	A	R	A	A	A	A	A	A	A	A	R	R	R	R	A	A	A	H	R	A
S2490_22008	G/A	2490	22008	+	NA	R	R	R	R	G	G	R	G	G	R	R	G	R	R	R	R	R	G	G	R	R	R	G	G	R	R	G	G	R	H	R	R	G	H	G	G	G	R	G	N	G	G	G	G
S2497_15463	T/C	2497	15463	+	NA	Y	T	Y	T	Y	Y	Y	Y	Y	T	T	T	Y	Y	T	T	T	T	T	T	Y	Y	Y	Y	Y	T	T	T	Y	Y	T	Y	T	Y	T	T	T	Y	Y	Y	Y	T	Y	T
S2499_24145	G/C	2499	24145	+	NA	G	S	S	S	G	G	S	G	S	S	S	G	G	G	N	G	S	S	S	G	G	S	G	G	S	S	S	S	G	G	G	N	G	G	G	G	S	S	G	H	G	N	S	S
S2501_21853	A/T	2501	21853	+	NA	W	W	W	W	A	A	H	A	A	H	W	W	W	H	A	W	N	A	A	W	A	W	A	A	A	W	A	W	W	W	A	N	A	A	A	A	A	W	A	N	H	A	A	W
S2502_7193	G/A	2502	7193	+	NA	G	G	R	R	G	R	G	G	G	G	R	R	G	R	G	R	R	G	G	R	R	R	G	G	G	R	R	R	G	R	R	G	G	G	G	G	G	R	G	G	G	R	G	G
S2503_17366	A/G	2503	17366	+	NA	R	H	R	R	A	A	R	A	R	R	R	R	A	A	A	A	R	R	R	A	A	R	A	A	R	R	R	R	A	A	R	H	A	A	A	A	H	R	A	N	N	A	R	R
S2513_5208	A/T	2513	5208	+	NA	A	W	A	A	A	A	W	W	W	W	A	A	A	W	A	A	A	A	W	A	A	A	W	A	A	A	A	A	W	W	A	A	A	A	W	W	W	A	W	H	A	A	W	A
S2515_2905	G/C	2515	2905	+	NA	G	S	G	G	G	G	S	G	G	S	S	S	S	G	G	S	S	G	G	G	G	G	G	G	S	G	S	S	S	G	G	G	G	G	G	G	G	G	G	N	G	G	G	G
S2516_4258	T/G	2516	4258	+	NA	T	T	K	K	K	T	K	K	T	T	K	T	K	T	K	T	T	T	T	T	K	K	K	T	K	T	T	K	K	T	K	K	T	K	K	T	T	K	K	T	T	T	T	T
S2520_2723	G/A	2520	2723	+	NA	R	R	G	R	R	G	G	G	R	G	R	H	G	G	G	G	G	G	G	G	G	G	R	G	R	R	G	R	R	G	R	R	R	G	G	G	G	G	G	G	R	G	R	G
S2521_17275	T/G	2521	17275	+	NA	T	T	K	K	T	T	K	T	T	K	T	K	T	K	K	K	K	T	T	T	T	K	T	T	T	K	T	K	T	K	K	K	K	T	T	T	T	T	T	H	K	T	T	K
S2525_7842	G/A	2525	7842	+	NA	G	G	R	R	R	G	R	G	G	G	R	G	R	G	R	G	G	G	G	R	R	R	R	G	R	G	G	G	R	G	R	N	G	R	R	G	G	R	R	N	N	G	G	R
S2527_4611	G/A	2527	4611	+	NA	R	G	H	G	R	R	R	R	R	G	G	G	R	R	R	G	R	G	G	G	R	R	R	R	R	G	G	G	R	N	G	H	G	R	G	G	G	R	R	N	R	N	R	G
S2530_9823	T/C	2530	9823	+	NA	T	Y	T	T	T	T	Y	Y	Y	Y	T	T	T	Y	T	T	T	Y	Y	T	T	T	Y	T	T	T	T	T	Y	Y	T	T	T	T	Y	Y	Y	T	Y	H	T	T	Y	T
S2532_21237	T/C	2532	21237	+	NA	T	T	Y	T	Y	Y	T	Y	T	Y	T	Y	Y	Y	Y	Y	Y	T	T	T	Y	Y	T	T	Y	T	T	T	Y	Y	T	T	T	Y	T	T	T	Y	T	Y	T	T	T	T
S2533_45191	T/C	2533	45191	+	NA	T	Y	T	Y	T	Y	Y	H	T	T	T	T	T	T	Y	T	T	Y	Y	Y	Y	T	Y	Y	Y	Y	T	Y	Y	Y	T	T	T	T	H	Y	T	T	H	Y	N	Y	T	T
S2534_12217	G/A	2534	12217	+	NA	G	R	G	G	R	R	R	H	H	R	R	G	R	G	N	G	R	R	R	R	R	G	G	G	R	G	R	R	R	G	G	G	G	G	G	G	H	G	G	N	N	R	R	R
S2543_17318	T/G	2543	17318	+	NA	T	K	T	T	K	K	K	H	T	T	K	T	K	T	K	K	H	T	K	K	K	T	T	K	K	T	K	K	K	T	T	N	T	T	T	T	T	T	T	H	N	K	K	K
S2545_16562	G/A	2545	16562	+	NA	G	G	G	R	G	R	R	R	G	G	R	G	R	G	R	G	G	G	G	R	R	G	H	G	G	R	R	G	R	G	R	R	G	R	R	G	G	R	R	G	G	G	G	R
S2547_20519	A/C	2547	20519	+	NA	M	M	M	M	A	A	M	A	M	M	M	A	A	A	A	A	A	M	M	A	A	M	A	A	M	M	M	M	A	A	A	M	A	A	A	A	M	M	A	N	A	A	M	M
S2554_5761	G/A	2554	5761	+	NA	R	R	G	R	R	R	G	G	R	G	G	G	G	R	G	G	G	R	R	G	G	G	G	G	R	R	R	R	G	G	G	G	R	G	G	G	G	G	G	N	G	R	G	G
S2555_10538	T/A	2555	10538	+	NA	T	W	T	T	T	W	H	T	W	T	T	W	W	W	N	T	W	T	T	T	T	T	W	T	T	W	W	T	T	T	T	N	T	T	W	W	T	W	T	T	T	W	H	T
S2560_8913	T/C	2560	8913	+	NA	Y	Y	Y	Y	T	T	Y	T	T	Y	Y	Y	Y	H	T	H	T	T	T	Y	T	Y	T	T	H	Y	T	Y	Y	Y	Y	Y	T	T	T	T	T	Y	T	T	H	T	T	Y
S2562_2212	T/G	2562	2212	+	NA	T	T	K	K	T	T	T	T	T	T	K	K	T	K	K	K	K	T	T	T	T	K	T	T	T	T	K	K	T	K	K	H	K	T	T	T	T	K	T	N	T	K	T	T
S2563_25208	A/C	2563	25208	+	NA	A	A	A	A	M	M	M	M	H	M	M	A	M	A	A	M	H	H	M	M	M	A	A	M	M	A	M	M	A	A	N	M	A	M	A	A	M	A	A	N	N	M	M	M
S2568_9768	G/C	2568	9768	+	NA	S	S	G	S	G	G	S	G	S	G	G	G	G	S	G	G	S	S	S	G	G	S	G	G	S	G	S	S	S	G	G	G	S	G	G	G	S	S	G	S	N	G	G	G
S2573_14442	G/A	2573	14442	+	NA	G	R	R	R	R	G	R	G	G	R	R	R	R	G	G	G	G	G	G	G	G	G	R	G	R	H	G	G	R	G	R	R	R	G	R	G	G	G	G	G	R	G	R	G
S2579_11357	A/G	2579	11357	+	NA	A	A	A	A	R	A	A	R	R	A	A	A	R	A	A	R	A	A	A	R	A	A	R	A	A	R	R	A	R	N	A	A	A	A	R	A	R	A	R	A	N	A	R	A
S2580_11217	G/C	2580	11217	+	NA	S	S	S	S	G	N	S	G	G	S	H	H	S	H	N	S	S	G	G	S	G	S	G	G	H	S	G	G	H	S	N	S	G	G	G	G	G	S	G	N	H	G	G	G
S2586_6680	G/T	2586	6680	+	NA	K	G	H	G	K	G	G	K	K	K	G	G	K	K	G	G	G	G	G	G	K	K	K	G	G	G	G	G	K	H	G	K	K	K	G	G	G	K	G	N	H	G	K	G
S2589_8035	A/C	2589	8035	+	NA	A	M	A	A	M	A	M	M	M	M	M	A	M	A	M	M	M	M	M	H	M	A	A	M	M	A	M	M	M	A	A	H	A	H	A	A	H	A	A	H	M	H	M	M
S2590_9243	G/C	2590	9243	+	NA	G	G	S	S	G	S	G	S	G	G	S	S	S	G	S	G	G	G	G	S	G	G	S	G	G	S	S	G	S	G	S	S	G	G	S	G	G	S	S	G	G	G	G	S
S2593_452	C/T	2593	452	+	NA	Y	Y	C	Y	Y	Y	C	C	Y	C	Y	Y	C	Y	C	C	C	Y	Y	C	C	C	Y	C	Y	Y	Y	Y	Y	C	C	Y	Y	C	Y	Y	C	C	C	C	Y	Y	C	C
S2594_8556	T/C	2594	8556	+	NA	T	Y	T	Y	Y	T	Y	T	Y	Y	Y	T	T	T	Y	Y	Y	T	T	T	T	T	Y	Y	T	T	T	Y	T	T	T	T	T	T	T	T	T	T	T	T	T	T	Y	Y
S2595_9623	T/A	2595	9623	+	NA	T	W	T	T	T	T	W	W	W	W	T	T	T	W	T	T	T	W	W	T	T	T	W	T	T	T	T	T	H	W	T	T	T	T	W	W	W	T	W	W	T	T	W	T
S2598_2370	A/G	2598	2370	+	NA	A	R	A	A	A	A	R	R	R	R	A	A	A	R	A	A	A	R	R	A	A	A	R	A	A	A	A	A	R	R	A	A	A	A	R	R	R	A	R	R	A	A	R	A
S2601_5004	T/C	2601	5004	+	NA	Y	Y	Y	Y	Y	Y	Y	T	Y	Y	Y	Y	T	T	T	T	Y	Y	Y	T	T	Y	T	T	T	Y	Y	Y	T	T	Y	H	T	T	T	T	Y	Y	T	Y	T	T	Y	Y
S2605_3045	T/G	2605	3045	+	NA	K	T	K	T	K	T	T	K	K	K	T	K	K	K	T	T	K	T	T	T	K	K	K	T	K	T	T	T	K	K	T	H	K	K	T	T	T	T	T	K	K	T	K	K
S2606_1400	C/A	2606	1400	+	NA	C	M	C	M	M	C	M	C	M	M	M	C	C	C	M	M	M	C	C	C	C	C	M	M	C	C	C	M	C	C	C	M	C	C	C	C	M	C	C	C	C	C	M	M
S2607_14693	T/A	2607	14693	+	NA	T	W	T	T	T	T	W	W	W	W	W	T	T	W	T	W	W	T	T	W	T	T	W	W	H	T	W	T	T	T	W	T	T	T	W	W	T	W	T	T	W	N	W	W
S2608_7944	G/A	2608	7944	+	NA	G	R	G	G	G	R	R	R	R	R	R	G	R	G	H	R	R	N	R	R	R	G	G	R	R	G	R	R	R	G	G	G	G	R	G	G	R	G	G	G	R	R	R	R
S2609_5998	A/G	2609	5998	+	NA	A	R	A	A	H	N	R	R	R	A	R	A	R	A	A	R	A	A	R	R	R	A	A	A	H	A	R	R	R	A	A	H	A	A	A	A	N	A	A	N	R	H	R	A
S2610_16797	G/A	2610	16797	+	NA	R	R	R	R	G	G	R	G	G	R	R	R	R	R	G	R	R	G	G	R	G	R	G	G	R	R	G	R	R	G	R	G	G	G	G	G	G	R	G	N	R	G	G	R
S2612_3258	T/C	2612	3258	+	NA	Y	T	Y	T	Y	Y	Y	Y	T	T	T	T	Y	Y	T	T	T	N	T	T	Y	Y	T	H	Y	T	T	T	Y	Y	T	N	T	H	T	T	T	Y	Y	H	Y	N	T	T
S2616_9104	A/T	2616	9104	+	NA	A	W	A	A	W	W	W	W	W	W	W	A	W	A	W	W	W	W	W	W	W	A	A	W	W	A	W	W	W	A	A	W	W	W	A	A	W	A	A	H	W	W	W	W
S2617_16527	A/G	2617	16527	+	NA	R	R	A	A	A	R	R	R	R	R	R	A	A	R	A	R	N	A	A	R	A	A	R	R	R	A	R	A	A	A	R	A	A	A	R	R	A	R	A	A	R	A	R	R
S2621_9732	T/A	2621	9732	+	NA	T	W	T	W	W	T	W	T	T	T	W	W	W	T	T	T	T	T	T	T	T	T	W	T	W	W	T	T	W	T	W	W	W	T	T	T	T	T	T	T	W	T	W	T
S2623_8322	T/C	2623	8322	+	NA	T	T	Y	T	T	Y	T	Y	T	Y	Y	Y	Y	Y	Y	Y	Y	T	T	T	Y	Y	T	T	Y	T	T	T	Y	Y	T	Y	T	Y	T	T	T	Y	T	Y	T	T	T	T
S2626_1221	G/C	2626	1221	+	NA	G	S	G	G	G	G	S	S	S	S	G	G	G	S	G	G	G	S	S	G	G	G	S	G	G	G	G	G	S	G	G	N	G	G	S	S	H	G	S	S	G	S	S	G
S2628_19682	G/T	2628	19682	+	NA	K	K	K	K	G	K	K	G	G	K	G	K	G	K	N	K	G	G	G	G	G	K	G	G	G	K	G	K	G	H	K	N	K	N	G	G	G	G	G	N	N	N	G	K
S2635_18480	G/A	2635	18480	+	NA	G	R	G	G	G	R	R	G	H	R	G	R	R	R	R	G	H	R	R	G	G	G	R	R	G	R	G	G	G	G	G	G	G	N	R	R	R	G	G	G	G	R	R	G
S2639_15148	G/T	2639	15148	+	NA	K	G	K	G	K	G	G	K	K	K	G	K	K	K	G	G	K	G	G	G	K	K	K	G	G	G	G	G	K	K	G	K	K	K	G	G	G	K	G	H	G	G	K	K
S2642_22414	G/T	2642	22414	+	NA	G	G	K	G	G	K	G	K	G	K	K	K	K	K	K	K	K	G	G	G	K	K	G	G	H	G	G	G	K	K	G	G	G	K	G	G	G	K	G	G	G	G	G	G
S2649_8853	T/C	2649	8853	+	NA	T	T	T	Y	Y	T	T	T	Y	Y	Y	N	T	T	Y	T	Y	T	T	T	T	T	Y	Y	T	T	T	Y	T	T	T	Y	Y	T	T	Y	T	T	T	N	N	T	Y	T
S2652_7489	A/T	2652	7489	+	NA	A	A	W	W	A	W	A	A	A	A	H	W	A	W	A	W	W	A	A	A	W	W	A	A	A	W	W	W	A	W	W	W	A	A	A	A	A	W	A	A	A	W	A	A
S2654_7081	T/C	2654	7081	+	NA	Y	Y	T	T	T	T	Y	T	Y	Y	Y	T	T	Y	T	Y	T	T	T	Y	T	T	T	Y	Y	T	Y	T	T	N	Y	T	T	T	Y	Y	T	Y	T	N	Y	T	Y	Y
S2656_5665	T/G	2656	5665	+	NA	T	K	T	T	K	K	K	K	T	K	K	T	K	T	K	K	K	T	T	T	T	T	T	T	K	T	K	K	K	T	T	T	T	T	T	T	T	T	T	T	T	T	K	T
S2657_19421	G/A	2657	19421	+	NA	G	R	G	G	R	G	R	R	R	R	G	G	G	R	G	G	G	G	G	G	G	G	R	G	G	R	G	G	R	R	G	G	G	G	R	R	R	G	R	G	G	G	R	G
S2665_1436	C/G	2665	1436	+	NA	S	S	S	S	C	C	S	C	C	H	S	S	S	S	C	S	S	C	C	S	C	S	C	C	S	C	C	S	S	C	S	C	C	C	C	C	C	S	C	N	S	C	C	C
S2668_16081	G/A	2668	16081	+	NA	G	H	R	R	R	G	H	G	G	R	R	R	R	G	G	G	G	G	G	G	G	G	R	G	G	R	G	G	R	G	R	G	R	G	R	G	G	G	G	G	H	G	R	G
S2669_13628	A/T	2669	13628	+	NA	A	A	A	W	W	W	W	A	W	W	W	A	A	A	W	A	W	A	A	A	W	A	W	W	A	A	A	W	A	A	W	W	W	A	A	W	A	A	A	W	A	A	A	W
S2676_22764	T/A	2676	22764	+	NA	T	T	T	W	W	W	W	T	W	W	W	T	T	T	W	T	W	T	T	T	W	T	W	W	T	T	T	W	T	T	W	W	W	T	T	W	T	T	T	H	T	T	T	W
S2679_6732	C/A	2679	6732	+	NA	C	C	C	C	M	C	C	M	M	C	C	C	C	M	C	M	C	C	C	M	C	C	M	C	C	M	C	C	C	M	C	C	C	C	M	C	M	C	M	M	C	C	M	C
S2681_3561	T/C	2681	3561	+	NA	T	Y	Y	Y	Y	T	Y	Y	T	T	Y	T	Y	T	Y	T	T	T	T	T	Y	Y	Y	T	Y	T	T	Y	Y	T	Y	H	T	Y	Y	T	T	Y	Y	T	T	T	T	Y
S2682_3888	A/G	2682	3888	+	NA	R	R	A	A	A	R	A	A	R	R	R	A	A	R	A	R	A	A	A	R	A	A	R	R	R	A	R	A	A	A	R	A	R	A	R	R	A	R	A	N	A	A	R	R
S2683_9820	G/A	2683	9820	+	NA	G	G	G	R	R	R	R	G	R	R	R	G	G	G	R	G	R	G	G	G	R	G	R	R	G	G	G	R	G	G	R	R	R	G	G	R	G	G	G	R	G	G	G	R
S2687_9263	T/A	2687	9263	+	NA	W	W	W	W	T	W	W	T	T	T	T	W	T	W	H	W	W	T	T	T	T	W	T	T	T	W	T	W	T	W	W	W	W	T	T	T	T	T	T	H	N	T	T	W
S2691_8082	G/A	2691	8082	+	NA	R	R	G	R	R	R	G	G	R	G	R	G	G	R	G	G	G	G	R	G	G	G	G	G	R	R	R	R	R	G	G	R	R	N	R	R	G	G	G	G	H	R	G	G
S2701_9375	T/A	2701	9375	+	NA	T	T	T	T	W	T	T	W	W	T	T	T	W	W	T	W	T	T	T	W	T	T	W	T	T	W	W	W	W	W	T	T	T	T	T	T	W	T	W	W	T	W	T	T
S2703_5556	C/A	2703	5556	+	NA	C	M	C	C	M	M	M	M	M	M	M	C	M	C	M	M	M	M	M	M	M	C	C	M	M	C	M	M	M	C	C	M	C	M	C	C	M	C	C	M	H	M	M	M
S2706_2026	A/G	2706	2026	+	NA	A	A	R	R	A	A	R	A	A	A	R	A	R	A	A	R	N	A	A	R	A	R	N	A	R	R	A	R	A	R	A	A	R	N	A	A	A	R	A	N	N	A	A	R
S2710_660	T/A	2710	660	+	NA	T	W	T	T	W	W	W	W	T	W	H	T	W	T	T	W	W	W	W	W	W	T	T	W	W	T	W	W	H	T	T	T	T	H	T	T	T	T	T	N	T	T	W	W
S2711_9657	C/G	2711	9657	+	NA	C	S	S	S	S	S	S	S	C	C	S	C	S	C	H	C	C	C	C	S	S	S	S	C	C	C	C	C	S	C	S	N	C	S	S	C	C	S	S	C	C	C	C	S
S2715_9280	T/G	2715	9280	+	NA	K	K	K	K	T	T	K	T	T	K	K	K	K	K	T	K	T	T	T	K	T	K	T	T	K	K	T	K	K	K	K	K	T	T	T	T	T	K	T	K	K	T	T	K
S2718_5736	C/T	2718	5736	+	NA	C	Y	Y	Y	Y	Y	Y	Y	C	C	Y	C	Y	C	Y	C	C	C	C	Y	Y	Y	Y	C	C	C	C	C	Y	C	Y	Y	C	Y	Y	C	C	Y	Y	C	C	C	C	Y
S2725_10034	A/G	2725	10034	+	NA	A	R	N	A	R	N	A	R	R	R	R	A	R	N	A	R	A	R	R	A	R	A	A	H	H	A	R	R	R	A	A	N	A	R	A	A	H	A	A	N	N	R	R	R
S2727_38444	T/C	2727	38444	+	NA	Y	T	Y	Y	Y	T	Y	T	T	Y	Y	Y	Y	T	T	Y	T	T	T	Y	T	Y	T	T	Y	H	T	Y	Y	Y	T	H	Y	T	T	T	T	Y	T	N	H	Y	T	Y
S2729_13893	G/T	2729	13893	+	NA	G	K	G	G	G	G	K	K	K	K	G	G	G	K	G	G	G	K	K	G	G	G	K	G	G	G	G	G	K	K	G	G	G	G	K	K	K	G	K	K	G	K	K	G
S2732_11069	A/T	2732	11069	+	NA	A	W	A	A	A	A	W	W	W	W	H	A	A	W	A	W	W	A	A	W	A	A	W	W	W	A	W	A	A	A	W	A	A	A	W	W	A	W	A	A	H	W	W	W
S2739_2915	T/C	2739	2915	+	NA	T	T	Y	Y	T	Y	T	T	T	T	Y	Y	T	Y	Y	Y	Y	T	T	T	T	Y	T	T	T	Y	Y	Y	T	Y	Y	Y	Y	T	T	T	T	T	T	Y	T	Y	T	T
S2740_13146	C/T	2740	13146	+	NA	C	Y	Y	Y	Y	C	Y	C	C	Y	Y	Y	Y	C	C	C	C	C	C	C	C	C	Y	C	Y	Y	C	C	Y	C	Y	Y	Y	C	Y	C	C	C	C	C	Y	C	Y	C
S2742_15250	C/T	2742	15250	+	NA	C	C	C	Y	Y	H	Y	C	Y	Y	Y	C	C	C	H	C	Y	C	C	C	Y	C	Y	Y	Y	C	C	Y	C	C	H	H	Y	C	C	Y	C	C	C	N	C	N	C	Y
S2743_1001	C/T	2743	1001	+	NA	C	Y	C	C	Y	C	Y	C	Y	Y	Y	C	C	C	C	Y	Y	C	C	C	C	C	Y	H	C	C	C	Y	C	C	C	Y	C	C	C	C	Y	C	Y	C	C	C	Y	C
S2751_26827	C/T	2751	26827	+	NA	C	Y	C	C	Y	Y	H	Y	Y	Y	Y	C	Y	C	Y	Y	Y	H	Y	Y	Y	C	N	Y	H	C	Y	Y	Y	C	C	N	Y	C	C	C	C	C	C	N	N	H	Y	H
S2753_13099	G/A	2753	13099	+	NA	G	R	G	R	R	G	R	R	R	R	R	R	R	N	N	G	G	G	G	G	G	G	R	N	R	G	G	G	R	G	R	H	R	G	R	G	G	G	G	N	H	G	R	G
S2756_4451	C/T	2756	4451	+	NA	Y	C	Y	Y	C	Y	Y	C	C	H	C	Y	C	Y	Y	Y	Y	N	C	C	C	Y	C	C	C	Y	C	Y	C	Y	Y	Y	Y	C	C	C	C	C	C	C	Y	C	C	N
S2759_5983	G/A	2759	5983	+	NA	G	R	G	G	R	H	R	R	R	R	R	G	R	G	N	R	H	R	R	R	R	G	G	R	R	G	R	R	R	G	G	G	R	R	G	G	R	G	G	N	N	R	G	H
S2762_22783	T/C	2762	22783	+	NA	T	Y	T	Y	Y	T	Y	T	Y	Y	Y	T	T	T	T	Y	Y	T	T	T	T	T	Y	Y	T	T	T	Y	T	T	T	T	T	T	T	T	Y	T	Y	T	T	T	Y	Y
S2764_1167	A/C	2764	1167	+	NA	A	M	M	M	M	A	M	M	A	A	M	A	M	A	A	A	A	A	A	M	M	M	M	A	A	A	A	A	M	A	M	M	A	M	M	A	A	M	M	A	A	A	A	M
S2768_8591	T/C	2768	8591	+	NA	Y	Y	T	T	Y	T	T	T	Y	Y	Y	T	T	Y	T	Y	T	T	T	Y	T	T	Y	T	Y	T	Y	Y	Y	T	Y	Y	Y	T	Y	Y	T	Y	T	T	Y	T	Y	Y
S2769_2100	G/A	2769	2100	+	NA	R	R	G	G	R	G	G	G	R	R	R	R	G	G	G	R	G	G	G	R	R	G	R	G	R	R	R	R	R	H	R	R	R	G	R	R	G	R	G	R	G	G	R	R
S2770_20808	G/A	2770	20808	+	NA	G	G	R	R	G	R	R	G	G	R	G	H	G	R	R	R	R	G	G	G	G	R	G	G	G	R	G	R	G	R	R	R	R	G	G	G	G	G	G	H	G	G	G	R
S2773_11317	T/C	2773	11317	+	NA	T	Y	T	T	Y	H	Y	H	Y	Y	T	T	Y	T	H	Y	T	Y	Y	Y	Y	T	T	H	Y	T	Y	Y	N	T	T	N	T	Y	T	T	Y	T	T	N	N	N	Y	T
S2777_20067	G/A	2777	20067	+	NA	R	R	G	R	G	G	R	G	R	G	G	G	G	R	G	G	R	R	R	G	G	R	G	G	R	G	R	R	R	G	G	R	R	G	G	G	R	R	G	R	R	G	G	R
S2786_5904	A/G	2786	5904	+	NA	A	A	A	A	A	R	A	A	A	A	A	R	R	A	R	A	A	A	A	R	A	A	R	A	A	R	R	A	R	A	R	N	A	N	R	A	A	H	R	A	A	A	A	R
S2789_23889	G/A	2789	23889	+	NA	R	R	G	R	G	G	G	G	R	R	G	G	G	R	G	G	G	H	R	G	G	R	G	G	H	G	R	R	G	G	G	H	R	G	G	G	R	R	G	H	R	G	R	R
S2801_13832	C/T	2801	13832	+	NA	Y	Y	C	C	C	H	Y	C	Y	Y	Y	C	C	Y	C	Y	C	C	C	H	C	C	Y	N	Y	C	Y	C	C	C	Y	C	Y	C	Y	Y	C	Y	C	N	C	N	Y	Y
S2802_13207	A/G	2802	13207	+	NA	A	A	A	R	R	R	A	A	A	A	A	A	R	R	R	A	A	A	A	A	A	R	R	R	R	A	A	A	R	A	R	R	A	A	R	R	A	R	R	N	A	R	R	A
S2803_1594	A/G	2803	1594	+	NA	A	A	A	A	R	A	R	R	R	A	A	A	A	R	A	A	A	A	A	R	A	A	R	A	A	R	A	A	R	R	A	A	A	A	R	A	R	A	R	A	N	A	R	A
S2805_9034	A/G	2805	9034	+	NA	A	A	R	R	A	R	R	A	A	R	R	R	R	R	R	R	R	A	A	R	R	R	A	A	R	R	A	A	R	R	A	R	A	R	A	A	A	R	A	R	A	A	A	A
S2806_15632	C/T	2806	15632	+	NA	Y	Y	Y	Y	C	C	Y	C	C	Y	Y	Y	Y	Y	Y	Y	Y	C	C	Y	C	Y	C	C	Y	Y	C	Y	Y	Y	Y	Y	C	C	C	C	C	Y	C	Y	Y	C	C	C
S2812_472	C/T	2812	472	+	NA	Y	Y	Y	Y	C	Y	Y	C	C	Y	C	Y	C	Y	Y	Y	Y	C	C	C	C	Y	C	C	C	Y	C	Y	C	Y	Y	Y	Y	C	C	C	C	C	C	Y	Y	C	C	Y
S2814_8767	A/C	2814	8767	+	NA	A	M	A	A	M	M	M	A	M	M	M	A	M	A	N	M	M	H	M	M	M	A	A	M	H	A	M	M	M	A	A	N	A	M	A	A	M	A	A	N	N	N	M	M
S2818_15107	T/C	2818	15107	+	NA	T	T	T	Y	Y	Y	T	T	Y	Y	Y	T	T	T	Y	T	T	T	T	T	Y	T	H	Y	T	T	T	Y	T	T	T	Y	Y	T	T	Y	T	T	T	N	T	T	Y	Y
S2821_6784	T/G	2821	6784	+	NA	T	T	T	K	T	T	K	T	K	K	K	K	T	T	K	T	H	T	T	T	K	T	K	K	K	T	T	K	T	T	K	T	T	T	T	K	T	T	T	N	N	N	T	K
S2824_1749	T/C	2824	1749	+	NA	T	T	T	Y	Y	Y	T	T	T	Y	Y	Y	T	T	Y	Y	Y	T	T	T	Y	T	Y	T	Y	Y	T	Y	T	T	Y	Y	Y	T	Y	Y	T	T	T	Y	T	T	T	Y
S2825_5004	T/A	2825	5004	+	NA	T	W	T	T	T	W	T	T	W	T	T	W	W	W	N	T	W	H	W	T	T	T	W	W	T	T	W	T	T	T	T	T	T	T	W	W	W	H	T	N	T	W	W	T
S2827_6052	T/C	2827	6052	+	NA	T	Y	T	T	Y	H	Y	Y	Y	Y	Y	H	Y	T	T	Y	Y	Y	Y	T	Y	T	T	Y	Y	T	Y	Y	Y	T	T	H	Y	T	T	T	Y	T	T	Y	T	H	Y	Y
S2829_21422	T/A	2829	21422	+	NA	T	W	T	T	T	T	T	W	W	T	W	T	T	W	N	W	W	T	T	W	T	T	W	W	W	T	W	T	T	T	W	T	T	T	W	W	N	W	T	T	T	N	W	W
S2833_37474	C/G	2833	37474	+	NA	C	C	S	S	C	S	C	C	C	C	S	S	C	S	C	S	S	C	C	C	S	S	C	C	C	S	S	S	C	S	S	N	S	C	C	C	C	S	C	C	C	C	C	C
S2834_20875	T/A	2834	20875	+	NA	T	T	T	W	W	T	W	T	W	W	W	T	T	T	W	W	W	T	T	T	T	T	W	W	T	T	T	W	T	T	T	N	T	T	T	W	H	T	T	T	T	T	W	W
S2836_11347	T/A	2836	11347	+	NA	W	W	W	W	T	W	W	T	W	W	W	W	T	T	T	T	W	W	W	T	T	W	T	T	W	W	W	W	T	T	T	W	T	T	T	T	W	W	T	W	T	T	W	W
S2839_11697	T/G	2839	11697	+	NA	K	K	K	K	T	T	K	N	T	K	K	K	K	K	K	K	K	T	T	K	T	K	T	T	K	K	T	K	K	K	T	K	T	T	T	T	T	K	T	K	K	N	T	T
S2847_10367	G/T	2847	10367	+	NA	G	K	G	G	G	K	K	G	K	G	G	H	K	K	K	G	H	G	G	G	G	G	G	K	G	G	K	G	G	G	G	G	G	G	K	K	K	K	G	G	G	K	K	G
S2850_26931	A/G	2850	26931	+	NA	A	R	R	R	A	A	R	A	A	R	R	R	R	R	N	R	R	A	A	R	A	H	A	A	R	R	A	A	R	R	R	H	A	A	A	A	N	H	A	N	A	A	A	A
S2851_33625	C/T	2851	33625	+	NA	Y	Y	Y	Y	C	C	Y	C	C	Y	Y	C	Y	Y	Y	Y	Y	C	C	Y	Y	Y	C	C	Y	Y	C	C	Y	C	Y	Y	C	Y	C	C	C	Y	C	C	C	C	C	C
S2852_8207	G/C	2852	8207	+	NA	G	S	S	S	S	G	S	G	G	S	S	S	S	G	G	G	G	G	G	G	G	G	S	G	S	S	G	G	S	G	S	S	S	G	S	G	G	G	G	G	S	G	S	G
S2853_2888	G/A	2853	2888	+	NA	R	R	G	R	G	G	R	G	R	R	R	G	G	R	G	G	G	R	R	G	G	R	G	G	R	G	R	R	R	G	G	R	R	G	G	G	R	R	G	N	R	G	R	R
S2854_15359	G/T	2854	15359	+	NA	G	K	G	G	K	G	K	G	K	K	K	G	G	G	G	K	K	G	G	G	G	G	K	K	G	G	G	K	G	G	G	G	G	G	G	G	K	G	K	G	G	G	K	G
S2859_8915	G/A	2859	8915	+	NA	R	R	R	G	G	R	R	G	R	R	R	G	G	R	R	R	G	G	G	R	G	G	R	R	R	G	R	G	G	G	R	G	G	G	R	R	G	R	G	G	R	G	R	R
S2861_3378	A/C	2861	3378	+	NA	M	M	A	A	M	N	A	A	M	M	M	M	A	A	A	M	A	A	A	M	A	A	M	A	H	M	M	M	M	A	M	N	M	A	M	M	A	M	A	A	N	A	M	A
S2862_10427	A/C	2862	10427	+	NA	A	A	M	A	M	A	A	M	M	A	A	A	M	M	A	M	A	A	A	M	A	A	M	A	M	M	M	M	M	M	A	A	A	A	A	A	M	A	M	M	M	M	A	A
S2864_9635	T/C	2864	9635	+	NA	Y	Y	T	Y	T	T	Y	T	Y	T	T	T	T	Y	T	T	Y	Y	Y	T	T	Y	T	T	Y	T	Y	Y	Y	T	T	Y	Y	T	T	T	Y	Y	T	T	Y	T	T	T
S2867_13771	C/T	2867	13771	+	NA	C	C	H	C	Y	C	C	Y	Y	C	C	C	Y	Y	N	Y	N	C	C	C	C	C	Y	C	Y	Y	Y	Y	Y	Y	C	C	C	C	C	C	Y	C	Y	Y	N	Y	C	C
S2869_23142	A/G	2869	23142	+	NA	R	H	A	R	A	A	R	A	R	R	R	A	A	R	N	A	A	R	R	A	A	R	A	A	R	A	R	R	R	A	A	A	R	A	A	A	R	R	A	H	R	A	R	R
S2870_15102	G/A	2870	15102	+	NA	G	R	G	G	G	G	R	G	R	R	G	G	G	R	G	G	G	R	R	G	G	G	R	G	G	G	G	G	R	H	G	N	G	G	R	R	R	G	R	H	G	G	R	G
S2871_2063	A/T	2871	2063	+	NA	W	W	W	W	A	W	W	A	W	W	W	W	A	A	A	A	W	W	W	A	A	W	A	A	W	W	W	W	A	A	A	W	A	A	A	A	H	W	A	A	A	A	W	W
S2872_5130	C/T	2872	5130	+	NA	Y	C	Y	C	H	Y	Y	C	Y	C	C	C	Y	H	C	C	C	C	C	C	C	Y	Y	Y	Y	C	C	C	Y	C	C	C	C	C	C	C	C	Y	Y	N	N	Y	Y	C
S2873_4881	C/T	2873	4881	+	NA	C	C	C	Y	Y	Y	Y	C	Y	Y	Y	C	C	C	Y	Y	Y	C	C	C	C	C	Y	Y	C	C	C	Y	C	C	C	Y	Y	C	C	Y	Y	C	C	C	C	C	Y	Y
S2874_16302	T/G	2874	16302	+	NA	K	K	T	K	T	T	K	T	K	T	T	T	T	K	T	T	K	K	K	T	T	K	T	T	K	T	K	K	K	T	T	K	K	T	T	T	K	K	T	K	K	T	T	K
S2875_1749	A/C	2875	1749	+	NA	A	M	A	A	M	A	M	A	M	M	M	N	A	A	A	M	M	A	A	A	A	A	M	M	A	A	A	M	A	A	A	A	A	A	A	M	M	A	M	A	A	A	M	A
S2880_6222	A/C	2880	6222	+	NA	A	M	A	A	M	M	M	M	M	M	M	M	M	A	A	M	M	M	M	A	M	A	A	M	M	A	M	M	M	A	A	M	M	M	A	A	M	A	A	M	A	M	M	M
S2881_18668	G/A	2881	18668	+	NA	G	G	G	R	R	R	R	G	R	R	R	G	G	G	R	R	R	G	G	G	G	G	R	R	G	G	G	R	G	G	G	R	R	G	G	R	R	G	G	R	G	G	R	R
S2886_13708	C/A	2886	13708	+	NA	C	M	C	C	M	M	M	M	M	M	M	M	M	C	M	M	M	C	M	C	M	C	C	C	M	C	M	M	M	C	C	H	M	M	C	C	M	C	C	H	C	M	M	M
S2887_3217	C/G	2887	3217	+	NA	S	S	S	S	C	S	S	C	S	S	S	C	C	S	C	C	C	S	S	C	C	S	C	C	S	C	S	S	C	C	C	S	C	C	C	C	S	S	C	C	C	C	S	S
S2888_9525	G/A	2888	9525	+	NA	G	R	R	R	R	G	R	G	G	G	R	R	R	G	G	G	G	G	G	G	G	G	R	G	R	R	G	G	R	G	R	R	R	G	R	G	G	G	G	G	R	G	R	G
S2890_5770	C/A	2890	5770	+	NA	M	M	C	C	C	C	M	M	M	M	M	N	C	M	N	M	C	C	C	C	C	C	M	M	M	C	M	C	C	C	M	C	C	N	M	M	C	M	C	C	C	C	M	M
S2892_12876	A/C	2892	12876	+	NA	M	M	M	M	A	A	M	A	A	M	M	A	M	A	A	M	A	A	A	M	A	A	A	A	A	M	A	M	A	A	M	M	A	A	A	A	A	M	A	N	H	A	A	M
S2893_9332	T/C	2893	9332	+	NA	T	T	T	T	Y	T	Y	Y	Y	Y	T	T	T	Y	T	T	T	T	T	Y	T	T	Y	T	T	T	T	T	Y	T	T	T	T	T	Y	Y	H	T	Y	N	N	T	Y	T
S2894_15778	C/A	2894	15778	+	NA	M	M	M	M	C	M	M	C	C	M	C	C	C	C	H	M	M	C	C	C	C	M	C	C	C	M	C	M	C	M	M	C	M	C	C	C	C	C	C	H	H	C	C	M
S2895_2739	A/G	2895	2739	+	NA	A	R	A	A	A	A	R	R	R	R	A	A	A	R	A	A	A	R	R	A	A	A	R	A	A	A	A	A	R	R	A	A	A	A	R	R	R	A	R	H	A	A	R	A
S2899_6795	G/T	2899	6795	+	NA	G	G	K	K	G	K	K	G	G	K	K	K	K	K	K	K	K	G	G	K	K	K	G	G	K	K	G	G	K	K	G	K	G	K	G	G	G	K	G	K	G	G	G	G
S2900_9181	A/G	2900	9181	+	NA	A	R	A	R	A	R	R	R	A	A	A	A	A	A	R	R	R	R	R	R	R	A	A	R	R	A	R	R	R	A	A	A	A	R	A	A	A	A	A	H	N	H	R	A
S2905_19384	G/A	2905	19384	+	NA	G	R	G	G	G	G	G	G	R	R	G	R	G	R	R	G	R	R	R	G	R	G	G	R	G	R	G	G	G	G	G	G	R	R	G	G	R	R	G	G	G	R	G	G
S2906_8448	G/C	2906	8448	+	NA	S	S	G	G	G	S	S	G	S	S	S	G	G	S	G	S	G	G	G	S	G	G	S	S	S	G	S	G	G	G	S	G	S	G	S	S	G	S	G	G	G	G	S	S
S2907_2946	T/C	2907	2946	+	NA	T	T	T	Y	Y	Y	Y	T	Y	Y	Y	Y	T	T	Y	T	T	T	T	T	Y	T	Y	Y	Y	T	T	Y	T	T	Y	H	Y	T	Y	Y	T	T	T	T	T	T	T	Y
S2910_19860	A/T	2910	19860	+	NA	W	W	A	W	A	A	W	A	W	A	A	A	A	W	A	A	W	W	W	A	A	W	A	A	W	A	W	W	W	A	A	W	W	A	A	A	W	W	A	N	H	A	A	A
S2913_1585	A/C	2913	1585	+	NA	M	M	M	M	A	M	H	A	A	M	A	M	A	M	H	M	M	A	A	A	A	M	A	A	A	M	A	M	A	M	M	M	M	A	A	A	A	A	A	H	N	A	A	M
S2914_19891	C/T	2914	19891	+	NA	C	C	C	Y	Y	Y	Y	C	Y	Y	Y	C	C	C	Y	Y	Y	C	C	C	C	C	Y	Y	C	C	C	Y	C	C	C	Y	Y	C	C	Y	Y	C	C	C	C	C	Y	Y
S2922_537	G/T	2922	537	+	NA	G	G	G	G	K	G	K	H	K	H	G	G	G	K	G	G	G	G	G	K	G	G	K	G	G	K	G	G	K	K	G	N	G	G	K	K	N	G	K	H	N	G	K	G
S2924_7308	G/T	2924	7308	+	NA	K	K	K	K	G	G	K	G	K	K	K	G	G	K	G	G	G	G	K	G	G	K	G	G	K	G	K	K	G	G	G	K	K	G	G	G	H	K	G	N	K	G	K	K
S2925_5809	C/T	2925	5809	+	NA	C	H	C	C	Y	Y	H	H	Y	H	Y	C	Y	C	H	Y	H	Y	Y	C	H	C	C	H	Y	C	Y	Y	Y	C	C	H	Y	Y	C	C	Y	C	C	H	C	Y	H	Y
S2926_9612	G/A	2926	9612	+	NA	G	G	G	R	R	R	G	G	R	R	R	G	G	G	R	G	H	G	G	G	R	G	R	R	G	G	G	R	G	G	G	R	R	N	G	R	G	G	G	N	G	G	R	R
S2932_18347	C/T	2932	18347	+	NA	Y	C	Y	C	Y	C	C	Y	Y	Y	C	Y	Y	Y	C	C	C	C	C	C	Y	Y	Y	C	Y	C	C	C	Y	Y	C	H	Y	Y	C	C	C	Y	C	C	Y	C	Y	Y
S2937_931	C/T	2937	931	+	NA	Y	Y	Y	Y	C	C	Y	C	C	Y	Y	Y	Y	Y	Y	Y	Y	C	C	Y	C	Y	C	C	Y	Y	C	C	Y	Y	Y	Y	C	C	C	C	C	Y	C	Y	C	C	C	C
S2938_11650	C/T	2938	11650	+	NA	Y	Y	C	C	Y	C	C	C	Y	Y	Y	C	C	Y	C	Y	C	C	C	Y	C	C	Y	C	Y	C	Y	Y	Y	C	Y	C	Y	C	Y	Y	C	Y	C	C	Y	C	Y	Y
S2940_5153	A/G	2940	5153	+	NA	A	A	R	A	R	R	A	R	A	R	A	R	R	R	R	R	R	A	A	A	R	R	A	A	R	A	A	A	R	R	A	N	A	H	A	A	A	R	A	H	N	A	A	A
S2941_8286	C/T	2941	8286	+	NA	Y	Y	Y	Y	C	C	Y	C	C	Y	Y	Y	Y	Y	C	Y	C	C	C	Y	C	Y	C	C	Y	Y	C	Y	Y	Y	Y	Y	C	C	C	C	C	Y	C	H	N	C	C	Y
S2942_8709	T/C	2942	8709	+	NA	Y	Y	T	Y	Y	Y	T	T	Y	T	Y	Y	T	Y	T	T	T	Y	Y	T	T	T	Y	T	Y	Y	Y	Y	Y	T	T	Y	Y	T	Y	Y	T	T	T	T	Y	Y	T	T
S2947_16514	T/C	2947	16514	+	NA	Y	Y	T	Y	T	T	Y	T	Y	T	T	T	T	Y	T	T	Y	Y	Y	T	T	Y	T	T	Y	T	Y	Y	Y	T	T	Y	Y	T	T	T	Y	Y	T	Y	Y	T	T	T
S2954_14196	T/C	2954	14196	+	NA	Y	T	Y	T	Y	T	T	H	Y	Y	T	Y	Y	Y	T	T	Y	T	T	T	Y	Y	Y	T	Y	T	T	T	Y	Y	T	Y	Y	Y	T	T	T	Y	T	T	H	T	Y	Y
S2955_30132	C/T	2955	30132	+	NA	C	C	C	Y	Y	C	Y	C	Y	Y	Y	Y	C	C	Y	C	Y	C	C	C	Y	C	Y	Y	Y	C	C	Y	C	C	Y	C	Y	C	Y	Y	C	C	C	C	C	C	C	Y
S2963_372	A/G	2963	372	+	NA	A	R	A	R	R	A	R	A	R	R	R	A	A	A	A	R	R	A	A	A	A	A	R	R	A	A	A	R	A	A	A	R	A	A	A	A	R	A	R	A	A	A	R	R
S2965_15483	G/C	2965	15483	+	NA	S	S	G	G	G	S	G	G	S	S	S	G	G	S	G	S	G	G	G	S	G	G	S	S	S	G	S	G	G	G	S	G	S	G	S	S	G	S	G	G	S	G	S	S
S2976_37840	A/G	2976	37840	+	NA	A	R	A	A	A	A	R	H	R	R	A	A	A	R	N	A	A	R	R	A	A	A	R	A	A	A	A	A	R	R	A	A	A	A	R	R	R	A	R	N	A	A	R	A
S2979_9886	G/A	2979	9886	+	NA	R	R	R	R	G	H	R	G	G	R	G	R	G	R	R	R	R	G	G	G	G	R	G	G	G	G	G	R	G	R	G	R	R	G	G	G	G	G	G	N	H	G	G	R
S2981_18080	C/A	2981	18080	+	NA	M	M	M	C	C	M	M	C	C	M	C	M	C	M	M	M	M	C	C	C	C	M	C	C	C	C	C	M	C	M	C	M	M	C	C	C	C	C	C	C	M	C	C	M
S2985_5513	C/T	2985	5513	+	NA	C	C	Y	Y	C	Y	C	C	C	C	Y	Y	C	Y	C	Y	Y	C	C	Y	Y	Y	C	C	C	Y	Y	Y	C	Y	Y	C	C	C	C	C	C	Y	C	C	C	Y	C	C
S2986_7054	T/C	2986	7054	+	NA	Y	T	Y	Y	T	T	Y	T	T	Y	Y	N	Y	Y	T	Y	T	T	T	T	T	Y	T	T	Y	Y	T	Y	Y	T	T	H	Y	T	T	T	T	T	T	N	N	Y	T	Y
S2989_2719	T/C	2989	2719	+	NA	T	T	Y	T	Y	Y	T	Y	T	Y	T	Y	Y	Y	Y	Y	Y	T	T	T	Y	Y	T	T	Y	T	T	T	Y	Y	T	T	T	Y	T	T	T	Y	T	T	T	T	T	T
S2992_10406	C/T	2992	10406	+	NA	Y	C	Y	C	Y	Y	Y	C	Y	C	C	C	Y	Y	Y	C	C	C	C	C	C	Y	Y	Y	Y	C	C	C	Y	C	C	Y	C	C	C	C	C	Y	Y	Y	C	Y	Y	C
S2995_8897	A/C	2995	8897	+	NA	A	A	A	M	M	M	M	A	M	M	M	A	A	A	M	M	M	A	A	A	A	A	M	M	A	A	A	M	A	A	A	M	M	A	A	M	M	A	A	H	A	A	M	M
S3000_15031	A/G	3000	15031	+	NA	A	A	R	R	A	R	A	A	A	A	R	R	A	R	A	R	R	A	A	A	R	R	A	A	A	R	R	R	A	R	R	H	R	A	A	A	A	R	A	H	A	H	A	A
S3002_16976	T/G	3002	16976	+	NA	K	K	T	T	T	H	K	T	K	K	K	T	T	K	T	K	T	T	T	K	T	T	K	H	K	T	K	T	T	T	K	T	K	T	K	K	T	K	T	N	T	T	K	K
S3006_2948	C/T	3006	2948	+	NA	Y	C	Y	C	Y	C	C	Y	Y	Y	C	Y	Y	C	C	C	Y	C	C	C	Y	Y	Y	C	Y	C	C	C	Y	Y	C	Y	Y	Y	C	C	C	Y	C	C	H	C	Y	Y
S3009_4322	G/A	3009	4322	+	NA	R	G	R	G	R	G	G	R	R	R	G	R	R	R	G	G	R	G	G	G	R	R	R	G	R	G	G	G	R	R	G	R	R	R	G	G	G	R	G	R	R	G	R	R
S3018_6803	A/G	3018	6803	+	NA	R	R	A	R	A	R	R	A	R	R	R	R	A	A	A	A	R	A	R	A	A	R	A	A	R	R	R	R	A	A	A	A	A	A	A	A	H	H	A	R	N	A	R	R
S3019_6941	T/A	3019	6941	+	NA	T	T	W	W	T	W	W	T	T	W	W	W	W	W	W	W	W	T	T	W	W	W	T	T	W	W	T	T	W	W	T	W	T	W	T	T	T	W	T	W	T	T	T	T
S3020_2312	G/A	3020	2312	+	NA	G	R	R	R	R	G	R	G	G	G	R	R	R	G	G	G	G	G	G	G	G	G	R	G	R	R	G	G	R	G	R	R	R	G	R	G	G	G	G	G	R	G	R	G
S3022_6501	G/T	3022	6501	+	NA	K	G	K	K	K	G	K	G	G	K	K	K	K	G	G	K	G	G	G	K	G	K	G	G	K	K	G	K	K	K	G	K	K	G	G	G	G	K	G	K	K	K	G	K
S3024_5981	C/T	3024	5981	+	NA	C	H	C	C	C	Y	Y	C	Y	C	C	Y	Y	Y	Y	C	Y	C	C	C	C	C	Y	Y	C	Y	Y	C	C	C	C	C	C	C	Y	Y	Y	Y	C	C	C	Y	Y	C
S3025_15586	G/A	3025	15586	+	NA	G	R	G	R	G	H	R	R	G	G	R	G	G	G	H	R	H	R	G	G	R	G	G	H	R	G	R	R	R	G	G	G	G	R	G	G	G	G	G	R	G	R	R	G
S3029_1094	G/C	3029	1094	+	NA	S	S	G	G	G	S	S	S	S	S	S	G	G	S	G	S	G	G	G	S	G	G	S	S	S	G	S	G	G	G	S	G	G	G	S	S	G	S	G	G	S	G	S	S
S3032_19324	C/T	3032	19324	+	NA	C	Y	C	C	Y	C	Y	Y	Y	Y	C	C	C	Y	C	C	C	C	C	C	C	C	Y	C	C	Y	C	C	Y	Y	C	C	C	C	Y	Y	Y	C	Y	Y	C	C	Y	C
S3046_26305	A/C	3046	26305	+	NA	A	A	A	M	M	M	M	A	M	M	M	M	A	A	M	A	M	A	A	A	M	A	M	M	M	A	A	M	A	A	M	M	M	A	M	M	A	A	A	M	A	A	A	M
S3053_13581	A/G	3053	13581	+	NA	R	R	R	R	A	A	R	A	A	R	R	R	R	R	A	R	R	A	A	R	A	R	A	A	R	R	A	R	R	R	R	R	A	A	A	A	A	R	A	R	R	A	A	R
S3058_2618	C/G	3058	2618	+	NA	C	S	C	C	S	S	S	S	C	S	S	C	S	C	S	S	S	S	S	S	S	C	C	S	S	C	S	S	S	C	C	S	C	S	C	C	C	C	C	S	C	S	S	S
S3060_26587	A/G	3060	26587	+	NA	A	A	R	A	R	R	A	R	A	R	A	A	R	R	R	R	R	A	A	A	R	R	A	A	H	A	A	A	R	R	A	A	A	R	A	A	A	R	A	H	A	A	A	A
S3070_13625	A/G	3070	13625	+	NA	A	R	A	A	R	A	R	R	R	R	R	R	R	A	A	R	R	R	R	A	R	A	R	R	R	A	R	R	R	A	A	R	R	A	R	H	R	A	R	A	A	R	A	R
S3080_14562	G/A	3080	14562	+	NA	G	R	R	R	R	G	R	R	G	G	R	G	R	G	R	G	G	G	G	G	R	R	R	G	R	G	G	R	R	G	R	R	G	R	R	G	G	R	R	G	G	G	G	R
S3081_18893	C/T	3081	18893	+	NA	C	Y	C	C	C	C	C	C	C	C	Y	Y	C	C	Y	C	Y	Y	Y	C	Y	C	C	C	C	C	C	C	C	C	C	Y	Y	Y	C	C	C	Y	C	C	C	Y	C	C
S3082_10250	G/A	3082	10250	+	NA	H	R	R	R	G	G	R	G	G	R	R	R	R	R	G	R	G	G	G	R	G	G	G	G	R	R	G	R	R	R	R	R	G	G	G	G	G	R	G	G	N	G	G	R
S3088_12661	G/A	3088	12661	+	NA	G	G	G	G	R	G	R	R	R	R	G	G	G	R	G	G	G	G	G	R	G	G	R	G	G	H	G	G	R	R	G	G	G	G	R	R	R	G	R	R	G	G	R	G
S3093_7556	A/T	3093	7556	+	NA	A	W	A	A	W	A	W	W	W	W	A	A	A	W	A	A	A	A	A	A	A	A	W	A	A	W	A	A	W	W	A	A	A	A	W	W	W	A	W	W	A	A	W	A
S3095_27307	A/G	3095	27307	+	NA	A	A	R	R	A	R	A	R	A	A	R	R	R	A	R	A	A	A	A	R	R	A	R	A	A	R	R	A	R	A	R	R	A	R	R	A	A	R	R	A	A	A	A	R
S3107_4230	C/T	3107	4230	+	NA	Y	Y	C	C	Y	C	C	C	Y	Y	Y	C	C	C	C	Y	C	C	C	Y	C	C	Y	Y	H	C	Y	Y	C	C	Y	Y	Y	C	Y	Y	C	Y	C	C	Y	C	Y	Y
S3108_1127	G/A	3108	1127	+	NA	R	G	R	R	G	G	R	G	G	R	R	R	R	R	N	R	G	N	G	R	G	R	G	G	H	R	G	R	R	R	G	G	G	G	G	G	G	R	G	H	H	G	G	G
S3109_2385	A/G	3109	2385	+	NA	A	A	R	R	A	R	R	A	A	H	R	R	R	R	N	R	N	A	A	R	R	R	A	A	R	R	A	A	R	R	A	N	A	H	A	A	A	R	A	N	A	A	A	A
S3115_16855	A/G	3115	16855	+	NA	A	R	A	R	A	H	R	R	A	A	A	A	A	A	R	A	R	R	R	R	R	A	R	R	R	R	A	R	R	A	A	A	A	R	H	R	A	A	R	A	A	R	A	A
S3116_8456	G/A	3116	8456	+	NA	G	G	R	G	R	R	G	R	G	R	G	R	R	R	R	R	R	G	G	G	R	R	G	G	R	G	G	G	R	R	G	G	G	R	G	G	G	R	G	R	G	G	G	G
S3127_6282	G/T	3127	6282	+	NA	K	G	H	G	K	G	G	H	K	K	G	H	K	H	G	G	K	G	G	G	K	K	K	G	K	G	G	G	K	H	G	K	G	K	G	G	G	K	G	N	G	G	K	K
S3136_3500	G/A	3136	3500	+	NA	R	R	R	R	G	R	R	G	G	R	G	R	G	R	R	R	R	G	G	G	G	R	G	G	G	R	G	R	G	R	R	R	R	G	G	G	G	G	G	G	R	G	G	R
S3140_17267	T/A	3140	17267	+	NA	W	W	N	W	T	T	W	T	W	W	W	T	T	W	T	T	T	W	W	T	T	W	N	T	W	T	W	W	W	T	T	W	W	T	T	T	W	W	T	N	W	T	W	W
S3141_4631	G/A	3141	4631	+	NA	G	G	G	R	R	R	G	G	G	R	R	R	G	G	R	G	R	G	G	G	R	G	R	G	R	R	G	R	G	G	R	R	R	G	R	R	G	G	G	R	G	G	G	R
S3143_19801	G/A	3143	19801	+	NA	G	G	H	R	G	R	G	G	G	G	R	R	G	R	G	R	G	N	G	R	R	R	G	G	G	R	R	R	G	R	R	G	G	G	G	G	G	R	G	H	G	H	G	G
S3146_11030	G/C	3146	11030	+	NA	S	S	G	S	S	G	G	G	S	G	S	G	G	S	G	G	G	S	S	G	G	G	S	G	S	S	G	S	S	G	G	G	S	G	G	S	G	G	G	G	S	G	G	G
S3148_8343	T/C	3148	8343	+	NA	H	Y	Y	Y	T	Y	H	T	Y	Y	Y	T	T	Y	T	T	T	H	Y	T	T	Y	T	T	Y	T	Y	Y	T	T	T	N	Y	T	T	T	T	Y	T	Y	T	T	H	Y
S3149_7002	G/T	3149	7002	+	NA	K	G	K	G	K	N	K	K	K	G	G	G	K	K	G	G	G	G	G	G	K	K	K	K	K	G	G	G	K	G	G	K	G	H	G	G	G	K	K	H	G	G	K	G
S3152_23871	C/T	3152	23871	+	NA	C	Y	C	C	Y	Y	Y	Y	Y	Y	Y	C	Y	C	Y	Y	Y	Y	Y	Y	Y	C	C	Y	Y	C	Y	Y	Y	C	C	C	Y	C	C	C	Y	C	C	C	H	Y	Y	Y
S3153_27449	G/C	3153	27449	+	NA	G	S	G	S	G	N	S	S	G	G	G	S	G	G	H	S	G	G	S	S	S	G	G	G	S	S	G	S	S	G	G	G	G	S	G	G	G	G	G	G	G	G	S	G
S3161_8825	A/G	3161	8825	+	NA	R	A	R	A	R	A	A	R	R	A	A	A	R	R	A	A	A	A	A	A	R	R	R	A	R	A	A	A	R	R	A	R	A	R	A	A	A	R	R	R	R	A	R	A
S3162_5491	A/G	3162	5491	+	NA	R	R	A	A	A	A	A	A	R	R	R	A	A	R	A	R	A	A	A	R	A	A	R	R	R	A	R	R	A	A	R	A	R	A	R	R	A	R	A	A	R	A	R	R
S3164_2435	T/C	3164	2435	+	NA	T	Y	T	T	Y	Y	Y	T	Y	Y	Y	Y	Y	T	T	Y	Y	T	Y	T	Y	T	T	Y	Y	T	Y	Y	Y	T	T	H	Y	Y	T	T	Y	T	T	Y	T	Y	Y	Y
S3168_16869	A/T	3168	16869	+	NA	A	W	A	A	A	A	W	A	W	W	A	A	W	W	A	A	W	W	W	A	A	A	W	W	A	W	A	A	A	A	A	A	A	A	W	W	W	A	A	A	A	A	W	A
S3169_7579	A/G	3169	7579	+	NA	A	A	A	R	R	A	R	A	R	R	R	A	A	A	R	R	R	A	A	A	A	A	R	R	A	A	A	R	A	A	A	R	R	N	A	A	R	A	A	A	A	A	R	R
S3171_10405	C/A	3171	10405	+	NA	M	M	M	C	C	M	M	C	C	M	C	M	C	M	M	M	M	C	C	C	C	M	C	C	C	C	C	M	C	M	C	M	M	C	C	C	C	C	C	C	M	C	C	M
S3173_2370	A/C	3173	2370	+	NA	A	M	A	A	M	M	M	M	M	M	M	A	M	A	M	M	M	M	M	M	M	A	A	M	M	A	M	M	M	A	A	H	M	M	A	A	A	A	A	A	H	H	M	M
S3174_15128	C/T	3174	15128	+	NA	Y	Y	Y	Y	C	C	Y	C	C	Y	Y	Y	Y	Y	C	Y	C	C	C	Y	C	Y	C	C	Y	Y	C	Y	Y	Y	Y	Y	C	C	C	C	C	Y	C	H	Y	C	C	Y
S3175_29938	T/G	3175	29938	+	NA	T	T	T	K	K	T	K	T	K	K	K	T	T	T	K	K	K	T	T	T	T	T	K	K	T	T	T	K	T	T	T	K	T	T	T	T	K	T	T	T	T	T	K	K
S3176_5714	A/G	3176	5714	+	NA	A	A	A	A	R	A	R	R	R	R	A	A	A	R	A	A	A	A	A	R	A	A	R	A	A	R	A	A	R	R	A	A	A	A	R	R	R	A	R	R	A	A	R	A
S3180_1371	G/A	3180	1371	+	NA	G	R	G	G	H	H	H	H	R	R	R	G	R	G	R	R	H	R	R	R	R	G	G	G	R	G	R	R	R	G	G	N	R	R	G	G	G	G	G	N	G	R	R	R
S3185_5969	A/T	3185	5969	+	NA	A	A	H	W	W	A	W	W	A	A	W	A	H	A	W	A	A	A	A	A	W	W	W	A	H	A	A	W	W	A	W	W	A	W	W	A	A	W	W	N	A	A	A	A
S3186_18553	G/T	3186	18553	+	NA	G	K	G	K	G	K	K	K	G	G	G	G	G	G	K	G	G	K	K	K	K	G	K	K	K	K	G	K	K	K	G	G	G	K	H	K	G	G	K	K	G	K	G	G
S3190_3611	C/T	3190	3611	+	NA	C	Y	Y	Y	Y	Y	Y	Y	C	C	Y	C	Y	C	Y	C	C	C	C	Y	Y	C	Y	C	C	C	C	C	Y	C	Y	Y	C	C	Y	C	C	Y	Y	C	C	C	C	Y
S3193_14090	C/G	3193	14090	+	NA	C	C	S	S	C	S	C	C	C	C	S	S	C	S	C	S	S	C	C	S	S	S	C	C	C	S	S	S	C	S	S	S	S	C	C	C	C	S	C	C	C	S	C	C
S3194_7556	G/A	3194	7556	+	NA	R	R	R	R	G	R	R	G	G	R	G	G	G	R	R	R	R	G	G	G	G	R	G	G	G	R	G	R	G	R	R	R	G	G	G	G	G	G	G	N	G	G	G	R
S3196_6566	T/G	3196	6566	+	NA	T	K	T	T	K	K	K	K	K	K	K	T	K	T	T	K	K	K	K	K	K	T	T	K	K	T	K	K	K	T	T	H	T	T	T	T	K	T	T	N	N	K	K	K
S3200_15745	A/C	3200	15745	+	NA	A	A	A	M	M	A	M	A	M	M	M	A	A	A	M	A	M	A	A	A	M	A	M	M	A	A	A	M	A	A	M	M	M	A	A	M	A	A	A	H	A	A	A	M
S3202_4987	G/T	3202	4987	+	NA	G	K	G	G	G	G	K	K	G	K	K	G	G	K	G	K	G	G	G	G	G	G	K	G	K	G	K	G	G	G	K	G	G	N	K	K	G	K	G	N	H	G	K	G
S3205_14589	G/T	3205	14589	+	NA	K	K	K	K	G	G	K	G	K	K	K	K	G	G	G	G	K	G	K	G	G	K	G	G	K	G	K	K	G	G	G	K	G	G	G	G	K	K	G	G	G	G	G	K
S3213_4315	A/T	3213	4315	+	NA	A	W	W	W	W	A	W	A	A	W	W	W	W	A	A	A	A	A	A	A	A	A	W	A	W	W	A	A	W	A	W	W	W	A	W	A	A	A	A	A	W	W	W	A
S3214_2192	C/A	3214	2192	+	NA	C	M	C	C	C	C	M	M	M	M	C	C	C	M	C	C	C	M	M	C	C	C	M	C	C	C	C	C	M	M	C	C	C	C	M	M	M	C	M	M	C	C	M	C
S3217_4557	A/T	3217	4557	+	NA	A	W	A	A	A	A	W	A	W	A	A	W	W	W	W	A	W	A	A	A	A	A	W	W	A	W	W	A	A	A	A	A	A	A	W	W	W	W	A	A	A	W	W	A
S3220_14719	C/A	3220	14719	+	NA	M	M	C	C	M	C	C	C	C	M	M	C	C	M	C	M	C	C	C	C	C	C	M	C	M	C	M	M	C	C	M	C	M	C	M	M	C	M	C	C	M	C	M	C
S3221_9885	G/C	3221	9885	+	NA	S	S	G	G	G	S	S	G	S	S	S	G	G	S	G	S	G	G	G	S	G	G	H	S	S	G	S	G	G	G	S	N	S	G	S	S	G	S	G	G	G	G	S	S
S3222_25911	G/A	3222	25911	+	NA	G	R	R	R	R	G	R	G	G	R	R	H	H	G	G	G	G	G	G	G	G	G	H	G	R	H	G	G	R	G	R	G	R	G	H	G	G	G	G	G	N	G	R	G
S3223_4176	A/G	3223	4176	+	NA	A	R	A	A	A	A	N	H	A	R	R	A	A	R	A	R	R	A	A	A	A	A	R	R	R	A	R	A	A	A	A	A	A	A	R	R	A	R	A	A	H	R	R	R
S3228_1315	A/G	3228	1315	+	NA	R	A	R	A	R	R	R	A	R	A	A	A	R	R	R	A	A	A	A	A	A	R	R	R	R	A	A	A	R	A	A	R	A	A	A	R	A	R	R	A	A	R	R	A
S3234_10922	A/C	3234	10922	+	NA	M	A	M	M	A	A	M	A	A	M	M	M	M	M	M	M	M	A	A	M	A	M	A	A	M	M	A	M	H	M	M	M	A	A	A	A	A	M	A	H	N	N	A	M
S3236_7117	A/G	3236	7117	+	NA	A	A	R	A	A	R	A	R	A	R	R	R	R	R	R	R	R	A	A	A	R	R	A	A	R	A	A	A	R	R	A	A	A	R	A	A	A	R	A	R	A	A	A	A
S3237_16957	A/T	3237	16957	+	NA	W	A	W	W	A	A	W	A	A	W	W	H	W	W	A	W	W	A	A	W	A	W	A	A	W	W	A	W	W	W	W	W	A	A	A	A	A	W	A	A	A	A	A	W
S3242_1765	A/G	3242	1765	+	NA	A	A	R	R	A	R	R	A	A	R	R	R	R	R	R	R	R	A	A	R	R	R	A	A	R	R	A	A	R	R	A	H	A	R	A	A	A	R	A	A	A	A	A	A
S3251_6044	A/T	3251	6044	+	NA	W	W	W	W	A	H	W	A	W	H	W	W	A	A	A	A	H	A	W	A	A	W	A	A	W	W	W	W	A	A	A	H	A	A	A	A	W	W	A	N	A	A	W	W
S3254_18799	G/A	3254	18799	+	NA	G	R	G	G	R	H	R	R	R	R	R	G	R	G	R	R	R	R	R	R	R	G	G	R	R	G	R	R	R	G	G	G	G	R	G	G	R	G	G	G	H	R	R	R
S3260_15211	C/T	3260	15211	+	NA	C	Y	C	C	C	C	Y	Y	Y	Y	C	C	C	Y	C	C	C	Y	Y	C	C	C	Y	C	C	C	C	C	Y	Y	C	C	C	C	Y	Y	Y	C	Y	Y	C	C	Y	C
S3278_4914	C/A	3278	4914	+	NA	C	C	C	M	M	M	C	C	C	M	M	M	C	C	H	M	M	C	C	C	M	C	M	C	H	M	C	M	C	C	H	M	M	C	M	H	C	C	C	C	C	C	C	C
S3283_4287	C/A	3283	4287	+	NA	C	M	M	M	M	C	M	M	C	C	M	C	M	C	M	C	C	C	C	M	M	M	M	C	C	C	C	C	M	C	M	M	C	M	M	C	C	M	M	C	C	C	C	M
S3292_21115	T/G	3292	21115	+	NA	K	T	K	T	K	K	K	K	K	T	T	T	K	K	T	T	T	T	T	T	K	K	T	K	K	T	T	T	K	K	T	K	T	K	T	T	T	K	K	T	N	T	K	T
S3296_3627	C/G	3296	3627	+	NA	S	S	S	S	C	H	S	C	C	S	C	S	C	S	C	S	S	C	C	C	C	S	C	C	C	S	C	S	C	C	S	H	S	N	C	C	C	C	C	N	N	C	C	S
S3298_5052	A/G	3298	5052	+	NA	A	A	R	R	A	R	R	A	A	R	A	H	A	R	R	R	R	A	A	A	A	R	A	A	A	R	A	R	A	R	R	R	R	A	A	A	A	A	A	N	R	A	A	A
S3302_1367	C/T	3302	1367	+	NA	C	Y	Y	Y	Y	N	Y	Y	C	C	Y	C	Y	C	Y	C	C	C	C	C	Y	Y	Y	C	Y	C	C	Y	Y	C	H	H	C	Y	Y	C	C	Y	Y	N	C	C	C	Y
S3305_7731	T/C	3305	7731	+	NA	T	Y	T	T	Y	Y	Y	Y	Y	Y	Y	T	Y	T	Y	Y	Y	Y	Y	Y	Y	T	T	Y	Y	T	Y	Y	Y	T	T	Y	T	Y	T	T	Y	T	T	Y	Y	Y	Y	Y
S3307_18236	G/A	3307	18236	+	NA	G	G	G	G	R	G	G	R	R	G	G	G	R	R	G	R	G	G	G	R	G	G	R	G	G	R	R	R	R	R	G	G	G	G	G	G	R	G	R	R	G	R	G	G
S3311_6450	T/C	3311	6450	+	NA	Y	Y	H	Y	T	H	H	T	Y	Y	Y	H	T	T	T	T	Y	H	H	T	T	Y	T	T	H	Y	Y	Y	T	T	T	Y	T	T	T	T	Y	Y	T	N	N	T	Y	Y
S3324_9664	G/T	3324	9664	+	NA	K	K	K	K	G	G	K	G	G	K	K	K	K	K	K	K	K	G	G	K	G	K	G	G	K	K	G	K	K	K	K	K	G	G	G	G	G	K	G	K	K	G	G	G
S3325_7689	G/A	3325	7689	+	NA	R	R	G	R	R	R	G	G	R	G	R	R	G	R	G	G	G	R	R	G	G	G	R	G	R	R	R	R	R	G	G	G	R	G	R	R	G	G	G	G	R	R	G	G
S3332_6433	A/C	3332	6433	+	NA	A	M	A	A	M	A	M	M	M	M	M	A	M	A	H	M	A	M	M	A	M	A	A	M	A	A	H	M	M	A	A	N	M	M	A	A	N	A	A	A	M	A	M	M
S3335_3299	A/C	3335	3299	+	NA	A	M	A	M	A	A	M	H	A	A	A	A	A	A	A	A	M	M	M	M	M	A	A	A	A	A	A	M	M	A	A	A	A	M	A	A	N	A	A	N	N	M	M	A
S3342_5544	G/C	3342	5544	+	NA	S	S	G	G	S	G	G	G	S	S	S	S	G	G	G	S	G	G	G	S	S	G	S	G	S	S	S	S	S	S	S	S	S	G	S	S	G	S	G	S	G	G	S	S
S3343_9742	C/T	3343	9742	+	NA	C	C	C	Y	Y	Y	Y	C	Y	Y	Y	C	C	C	Y	C	Y	C	C	C	Y	C	Y	Y	C	C	C	Y	C	C	Y	Y	Y	C	C	Y	C	C	C	Y	C	C	C	Y
S3346_8082	A/T	3346	8082	+	NA	W	W	H	W	A	N	W	A	A	W	W	W	H	H	A	W	H	A	A	W	A	W	A	A	W	W	A	W	W	H	W	W	A	N	A	A	A	W	A	W	N	A	A	W
S3351_12109	T/C	3351	12109	+	NA	T	Y	Y	Y	Y	T	Y	T	N	T	Y	T	Y	T	T	T	T	T	T	T	T	T	Y	T	Y	H	T	T	H	T	Y	N	Y	T	Y	T	T	T	T	T	H	T	Y	T
S3358_8112	A/G	3358	8112	+	NA	A	R	A	A	R	A	R	H	R	R	R	A	R	A	R	R	A	N	R	A	R	A	A	R	R	A	R	R	R	A	A	R	R	A	A	A	A	A	A	H	N	H	R	R
S3361_11560	T/C	3361	11560	+	NA	Y	Y	H	Y	T	N	Y	Y	Y	Y	Y	T	T	T	T	T	Y	Y	Y	T	T	Y	T	T	Y	Y	Y	Y	T	N	T	T	Y	T	T	T	N	Y	T	H	T	T	Y	Y
S3362_11509	C/T	3362	11509	+	NA	C	C	C	Y	Y	Y	Y	C	Y	Y	Y	C	C	C	Y	Y	Y	C	C	C	C	C	Y	Y	C	C	C	Y	C	C	C	Y	Y	C	C	Y	Y	C	C	N	C	C	Y	Y
S3363_8302	A/C	3363	8302	+	NA	A	A	M	A	A	M	A	M	A	A	A	M	M	A	A	A	A	A	A	M	A	A	M	A	A	M	M	A	M	A	M	M	A	A	M	A	A	M	A	A	A	A	A	M
S3364_17123	A/T	3364	17123	+	NA	A	A	W	A	A	A	W	A	A	W	A	A	A	H	N	W	W	N	A	A	A	W	A	A	A	H	A	W	A	W	W	A	W	A	A	A	A	A	A	W	N	A	A	W
S3368_4715	T/A	3368	4715	+	NA	W	T	W	W	T	W	W	T	T	W	T	W	T	W	W	W	W	T	T	T	T	W	T	T	T	W	T	W	T	W	W	W	W	T	T	T	T	T	T	H	W	T	T	W
S3369_10267	C/A	3369	10267	+	NA	C	C	M	M	C	M	C	M	C	C	M	M	M	C	M	C	C	C	C	C	C	C	M	C	C	M	M	C	C	C	M	C	C	C	M	C	C	C	M	C	C	C	C	C
S3380_10414	G/A	3380	10414	+	NA	G	H	R	R	R	G	R	G	G	R	R	R	R	G	G	G	G	G	G	G	G	G	R	G	R	R	G	G	R	G	R	G	R	G	R	G	G	G	G	N	H	G	R	G
S3391_11595	T/G	3391	11595	+	NA	K	K	T	K	K	T	T	T	K	T	K	K	T	T	T	T	T	T	T	T	T	T	K	T	K	K	T	K	K	T	K	K	K	T	T	T	T	T	T	T	K	T	K	T
S3395_11492	A/C	3395	11492	+	NA	M	M	M	M	A	A	M	A	A	M	M	M	M	M	M	M	M	A	A	M	A	M	A	A	M	M	A	M	M	M	M	M	A	A	A	A	A	M	A	M	M	A	A	M
S3402_12892	A/G	3402	12892	+	NA	R	R	A	R	R	A	A	A	R	A	R	R	A	R	A	A	A	R	R	A	A	A	R	A	R	R	R	R	R	A	R	H	R	A	A	R	A	A	A	A	H	A	R	A
S3405_9192	G/T	3405	9192	+	NA	G	K	K	K	K	G	K	G	G	G	K	K	K	G	G	G	G	G	G	G	G	G	K	G	K	K	G	G	K	G	K	K	K	G	K	G	G	G	G	G	K	G	K	G
S3410_549	C/T	3410	549	+	NA	Y	C	C	C	Y	C	Y	C	Y	C	C	Y	C	C	C	Y	C	C	C	C	Y	Y	C	C	Y	Y	Y	Y	Y	Y	C	Y	Y	C	C	C	C	Y	C	Y	C	C	C	Y
S3411_6977	C/A	3411	6977	+	NA	C	M	C	C	C	H	M	C	M	C	C	M	C	M	M	M	M	C	C	C	C	C	M	M	C	C	M	C	C	C	C	C	C	C	M	M	C	M	C	C	N	M	M	C
S3416_15347	T/G	3416	15347	+	NA	T	K	T	T	K	K	K	K	T	T	K	T	K	T	K	K	K	K	K	K	K	T	T	K	K	T	K	K	K	T	T	K	T	K	T	T	T	T	T	K	T	K	K	K
S3419_8782	C/T	3419	8782	+	NA	C	C	C	Y	Y	H	C	C	C	Y	Y	Y	C	C	Y	C	Y	C	C	C	Y	C	Y	C	N	Y	C	Y	C	C	Y	C	Y	C	Y	Y	C	C	C	N	C	C	C	Y
S3424_14361	T/C	3424	14361	+	NA	T	Y	T	T	T	T	Y	Y	Y	Y	Y	T	T	Y	T	Y	T	T	T	Y	T	T	Y	Y	Y	T	Y	T	T	T	Y	T	T	T	Y	Y	T	Y	T	T	Y	T	Y	Y
S3432_8538	T/C	3432	8538	+	NA	Y	T	Y	T	Y	T	T	Y	H	Y	T	Y	Y	Y	T	T	H	T	T	T	Y	Y	Y	T	T	T	T	T	T	T	T	T	T	Y	T	T	T	Y	T	T	T	T	Y	Y
S3436_11849	A/C	3436	11849	+	NA	A	A	A	M	M	M	M	A	M	M	M	A	A	A	M	A	M	A	A	A	M	A	M	M	A	A	A	M	A	A	M	M	M	A	A	M	A	A	A	M	A	A	A	M
S3439_4080	A/G	3439	4080	+	NA	R	A	R	R	A	A	R	A	A	R	R	R	R	R	A	R	A	A	A	R	A	R	A	A	R	R	A	R	R	R	A	H	R	A	A	A	A	R	A	N	R	N	A	R
S3444_2986	G/C	3444	2986	+	NA	S	S	S	S	G	G	S	G	G	S	S	S	H	G	S	S	S	G	G	G	G	G	G	G	S	S	G	S	S	S	S	G	G	G	G	G	G	G	G	H	H	G	G	G
S3452_3121	C/G	3452	3121	+	NA	C	S	C	C	C	C	S	C	S	S	C	S	C	S	S	C	S	S	S	C	C	C	C	S	C	S	C	C	C	C	C	C	C	C	C	C	S	S	C	C	C	S	C	C
S3460_7732	G/A	3460	7732	+	NA	G	R	G	G	R	R	H	R	R	R	R	G	R	G	H	R	H	N	R	R	R	G	G	R	G	G	R	R	R	G	G	G	G	H	G	G	G	G	G	N	G	G	R	R
S3461_8727	A/G	3461	8727	+	NA	R	R	R	R	A	A	R	A	A	R	R	R	R	R	A	R	A	A	A	R	A	R	A	A	R	R	A	R	R	R	R	R	A	A	A	A	A	R	A	R	R	A	A	R
S3463_18554	G/A	3463	18554	+	NA	R	R	R	R	G	R	R	G	H	R	R	R	G	G	G	G	R	R	R	G	G	H	G	G	R	R	R	R	G	G	G	G	G	G	G	G	H	R	G	H	G	G	R	R
S3464_11174	G/C	3464	11174	+	NA	S	S	S	S	G	G	S	G	G	S	S	S	S	S	G	S	G	G	G	S	G	S	G	G	S	S	G	S	S	S	S	S	G	G	G	G	G	S	G	S	S	G	G	S
S3466_13633	C/G	3466	13633	+	NA	C	S	C	C	S	C	C	S	S	S	S	C	S	C	H	S	S	H	S	S	S	C	C	S	S	C	S	S	S	C	C	C	C	C	C	C	S	C	C	C	C	H	S	S
S3468_34906	T/C	3468	34906	+	NA	T	T	T	Y	Y	Y	Y	T	Y	Y	Y	Y	T	T	N	T	H	T	T	T	Y	T	Y	Y	Y	T	T	Y	T	T	Y	T	Y	T	Y	Y	T	T	T	T	T	T	T	T
S3470_8204	G/A	3470	8204	+	NA	R	R	G	G	G	R	R	R	R	R	R	G	G	R	G	R	G	G	G	R	G	G	R	R	R	G	R	G	G	G	R	G	G	G	R	R	G	R	G	G	R	G	R	R
S3475_13920	A/G	3475	13920	+	NA	R	R	A	A	A	R	R	A	R	R	R	A	A	R	A	R	A	A	A	R	A	A	R	R	R	A	R	A	A	A	R	A	R	A	R	R	A	R	A	A	R	A	R	R
S3476_7626	C/T	3476	7626	+	NA	C	C	Y	Y	C	Y	Y	C	C	Y	C	Y	C	Y	Y	Y	Y	C	C	C	C	Y	C	C	C	Y	C	Y	C	Y	Y	Y	Y	C	C	C	C	C	C	Y	C	C	C	Y
S3477_6343	G/T	3477	6343	+	NA	G	K	G	K	G	N	G	K	G	G	G	G	G	G	K	G	K	G	K	K	K	G	K	H	K	K	G	K	G	G	G	G	G	K	H	K	G	G	K	N	N	H	G	G
S3481_1067	G/A	3481	1067	+	NA	R	R	R	R	G	R	R	G	G	R	R	R	R	R	R	R	R	G	G	R	R	R	G	G	R	R	G	G	R	R	R	R	G	R	G	G	G	R	G	R	G	G	G	G
S3486_13806	A/G	3486	13806	+	NA	A	A	R	R	A	H	A	A	A	A	R	A	A	R	A	R	R	A	A	R	R	R	A	A	A	A	A	R	A	R	R	A	A	A	A	A	A	R	A	R	A	R	A	A
S3490_4526	A/G	3490	4526	+	NA	R	R	R	R	A	A	R	A	A	R	R	R	R	R	R	R	H	A	A	R	A	R	A	A	R	R	A	R	R	H	R	R	A	A	A	A	A	R	A	A	R	A	A	R
S3491_780	G/A	3491	780	+	NA	G	R	G	G	R	G	R	R	R	R	G	G	G	R	G	G	G	G	G	G	G	G	R	G	G	G	G	G	R	R	G	G	G	G	R	R	R	G	R	G	G	G	R	G
S3493_11130	T/C	3493	11130	+	NA	T	T	Y	Y	T	Y	Y	T	T	Y	T	Y	T	Y	Y	Y	Y	T	T	T	T	T	T	T	T	Y	T	Y	T	Y	Y	N	Y	T	T	T	T	T	T	T	Y	T	T	T
S3503_4072	A/G	3503	4072	+	NA	A	R	A	A	A	A	R	R	R	R	A	A	A	R	A	A	A	R	R	A	A	A	R	A	A	A	A	A	R	A	A	N	A	A	H	R	R	A	R	R	A	R	R	A
S3505_3474	T/A	3505	3474	+	NA	T	W	T	T	W	T	W	W	W	H	T	T	T	W	T	T	T	T	T	T	T	T	W	T	T	W	T	T	W	W	T	T	T	T	W	T	W	T	W	N	T	T	W	T
S3507_3762	T/C	3507	3762	+	NA	T	Y	Y	Y	Y	Y	Y	Y	T	T	Y	T	Y	T	Y	T	T	T	T	Y	Y	T	Y	T	T	T	T	T	Y	T	Y	Y	T	Y	Y	T	T	Y	Y	T	T	T	T	Y
S3508_2650	A/G	3508	2650	+	NA	A	R	R	R	R	A	R	R	A	A	R	A	R	A	R	A	A	A	A	A	R	R	R	A	R	A	A	A	R	A	R	R	A	R	R	A	A	R	R	A	A	A	A	R
S3511_2539	G/A	3511	2539	+	NA	R	R	G	R	G	G	R	G	R	R	R	G	G	R	G	G	G	R	R	G	G	R	G	G	R	G	R	R	R	G	G	R	R	G	G	G	R	R	G	H	R	G	G	R
S3512_1281	A/G	3512	1281	+	NA	A	A	A	A	R	A	R	R	R	R	A	A	A	A	A	A	A	A	A	R	A	A	R	A	A	R	A	A	R	A	A	A	A	A	R	R	N	A	R	N	N	A	R	A
S3513_9335	A/G	3513	9335	+	NA	A	A	R	A	R	R	A	R	A	R	A	R	R	R	R	R	R	A	A	A	R	R	A	A	R	A	A	A	R	R	A	A	A	R	A	A	A	R	A	H	A	A	A	A
S3514_3232	G/A	3514	3232	+	NA	G	R	G	R	R	R	R	R	G	G	R	G	G	G	R	R	R	R	R	R	R	G	G	R	R	G	R	R	R	G	G	G	G	R	G	G	G	G	G	H	G	R	R	G
S3516_8696	T/C	3516	8696	+	NA	T	Y	T	T	Y	N	Y	T	Y	H	Y	T	Y	T	T	Y	Y	T	Y	T	Y	T	T	Y	H	T	Y	Y	Y	T	T	N	T	T	N	T	Y	T	T	T	T	Y	T	Y
S3519_3609	C/T	3519	3609	+	NA	Y	Y	C	Y	Y	Y	C	C	Y	C	Y	Y	C	Y	C	C	C	Y	Y	C	C	C	Y	C	Y	Y	Y	Y	Y	C	C	Y	Y	C	Y	Y	C	C	C	C	C	Y	C	C
S3520_20809	A/T	3520	20809	+	NA	W	A	A	A	A	W	A	W	A	A	A	A	W	A	W	W	W	A	A	W	A	A	A	A	W	A	W	A	A	W	W	N	A	W	A	A	W	A	A	A	W	W	A	A
S3524_1543	T/C	3524	1543	+	NA	T	H	T	Y	H	Y	Y	Y	T	T	H	T	T	T	H	Y	H	Y	Y	Y	Y	T	T	Y	Y	T	H	H	Y	T	T	N	T	Y	N	T	T	T	T	H	T	H	H	H
S3526_1508	T/C	3526	1508	+	NA	Y	T	Y	Y	Y	T	T	T	T	Y	Y	Y	Y	T	T	Y	T	T	T	Y	T	Y	T	T	Y	Y	T	Y	Y	T	T	H	Y	T	T	T	T	Y	T	H	Y	Y	T	Y
S3530_19978	T/C	3530	19978	+	NA	T	Y	T	T	T	T	Y	Y	Y	Y	Y	T	T	Y	T	Y	Y	T	T	Y	T	T	Y	T	Y	T	Y	T	T	T	Y	T	T	T	Y	T	T	Y	T	T	H	T	Y	Y
S3534_10021	C/T	3534	10021	+	NA	C	C	C	H	Y	H	C	C	Y	Y	Y	Y	C	C	Y	C	H	N	C	C	Y	C	Y	Y	Y	N	C	Y	C	N	Y	C	Y	C	Y	Y	C	N	C	N	C	C	C	Y
S3535_5084	A/G	3535	5084	+	NA	R	R	R	R	A	A	R	A	A	R	R	R	R	R	R	R	R	A	A	R	A	R	A	A	R	R	A	R	R	R	R	A	A	A	A	A	A	R	A	A	R	A	A	A
S3539_6216	A/G	3539	6216	+	NA	R	R	R	R	R	R	R	A	R	R	R	R	A	A	A	A	R	R	R	A	A	R	A	A	A	R	R	R	A	A	R	R	A	A	A	A	R	R	A	R	A	A	R	R
S3546_1561	C/G	3546	1561	+	NA	C	C	S	C	S	S	S	S	S	C	C	C	S	S	C	C	C	C	C	C	S	S	S	S	S	C	C	C	S	C	C	N	C	N	C	C	C	S	H	N	C	C	S	C
S3548_371	C/G	3548	371	+	NA	C	C	C	C	S	C	C	S	S	C	C	C	S	S	C	S	C	C	C	S	C	C	S	C	C	S	S	C	S	S	C	C	C	C	S	C	S	C	S	C	C	C	S	C
S3549_4849	T/C	3549	4849	+	NA	Y	Y	T	T	T	Y	Y	T	Y	Y	Y	T	T	Y	T	Y	T	T	T	Y	T	T	Y	Y	Y	T	Y	T	T	T	Y	T	Y	T	Y	Y	T	Y	T	T	Y	T	Y	Y
S3552_24535	T/C	3552	24535	+	NA	T	T	T	Y	H	H	Y	T	Y	Y	Y	T	T	T	Y	Y	Y	T	T	T	T	T	Y	Y	T	T	T	Y	T	T	T	Y	Y	T	T	Y	Y	T	T	Y	T	T	Y	Y
S3553_18917	T/C	3553	18917	+	NA	T	Y	T	Y	T	T	Y	Y	T	T	T	T	T	T	T	Y	H	H	Y	Y	Y	T	T	Y	Y	T	Y	Y	H	T	T	N	T	H	T	T	T	T	T	N	T	H	Y	T
S3557_7551	T/C	3557	7551	+	NA	T	T	Y	Y	T	Y	T	T	T	T	T	Y	T	Y	Y	Y	Y	T	T	T	T	Y	T	T	T	Y	T	Y	T	Y	Y	T	Y	T	T	T	T	T	T	Y	T	T	T	T
S3561_2331	G/A	3561	2331	+	NA	G	R	R	R	R	H	R	R	G	G	R	G	R	G	R	G	G	G	G	R	R	R	R	G	G	G	G	G	R	G	R	R	G	R	R	G	G	R	R	G	G	G	G	R
S3565_11628	T/C	3565	11628	+	NA	T	Y	Y	Y	Y	N	T	T	T	T	Y	Y	Y	T	T	T	T	N	T	T	T	T	Y	T	Y	H	T	T	Y	T	N	T	H	N	T	Y	N	T	T	T	Y	T	Y	T
S3568_5399	T/A	3568	5399	+	NA	W	W	W	W	T	N	W	T	W	W	W	T	T	T	T	T	W	W	W	T	T	H	T	T	W	W	W	T	T	T	T	N	T	T	T	T	W	W	T	N	T	T	W	H
S3571_6550	A/G	3571	6550	+	NA	A	R	R	R	R	A	R	A	A	R	R	R	R	A	A	A	A	A	A	A	A	A	R	A	R	R	A	A	R	A	R	R	R	A	R	A	A	A	A	A	R	A	R	A
S3572_11038	G/T	3572	11038	+	NA	G	K	K	K	K	G	K	G	G	K	K	K	K	G	G	G	G	G	G	G	G	G	K	G	K	K	G	G	K	G	K	H	K	G	K	G	G	G	G	G	K	G	K	G
S3573_14498	T/C	3573	14498	+	NA	Y	Y	Y	Y	T	Y	Y	T	Y	Y	Y	T	T	Y	T	T	T	Y	Y	T	T	Y	T	T	Y	T	Y	Y	T	T	T	Y	Y	T	T	T	Y	Y	T	Y	Y	T	Y	Y
S3575_4000	G/A	3575	4000	+	NA	R	R	R	R	G	R	R	G	R	R	R	G	G	G	G	G	R	R	R	G	G	R	G	G	R	R	R	R	G	G	G	H	G	G	G	G	R	R	G	H	N	G	R	R
S3576_33180	T/C	3576	33180	+	NA	T	Y	T	T	T	T	T	T	Y	Y	T	Y	T	Y	Y	T	T	T	Y	T	Y	T	T	Y	T	Y	T	T	T	T	T	T	Y	Y	T	T	Y	Y	T	N	T	Y	T	T
S3577_8638	A/C	3577	8638	+	NA	A	M	A	A	M	M	M	M	M	M	M	A	M	A	M	M	M	M	M	M	M	A	A	M	M	A	M	M	M	A	A	H	A	M	A	A	M	A	A	M	M	M	M	M
S3578_18692	T/C	3578	18692	+	NA	Y	T	Y	Y	T	Y	Y	T	T	Y	T	Y	T	Y	Y	Y	Y	T	T	T	T	Y	T	T	T	Y	T	Y	T	Y	Y	Y	Y	T	T	T	T	T	T	Y	Y	T	T	Y
S3580_14257	C/T	3580	14257	+	NA	Y	C	Y	C	Y	C	C	Y	Y	Y	C	Y	Y	Y	N	C	Y	C	C	C	Y	Y	Y	C	C	C	C	C	H	Y	C	C	Y	Y	C	C	C	Y	C	N	C	C	Y	Y
S3585_12149	C/T	3585	12149	+	NA	C	C	Y	Y	C	H	Y	C	C	H	Y	Y	Y	Y	Y	Y	H	C	C	Y	H	Y	C	C	C	C	C	C	Y	Y	C	H	C	Y	C	C	C	Y	C	N	C	C	C	C
S3586_7804	G/A	3586	7804	+	NA	G	G	G	R	R	R	G	G	R	R	R	G	G	G	R	G	R	G	G	G	R	G	R	R	G	G	G	R	G	G	G	R	R	G	G	R	G	G	G	R	G	G	R	R
S3587_4134	T/C	3587	4134	+	NA	Y	Y	T	Y	Y	T	T	T	Y	T	Y	Y	T	Y	T	T	T	Y	Y	T	T	T	Y	T	Y	Y	Y	Y	Y	T	Y	Y	Y	T	T	Y	T	T	T	T	Y	T	T	T
S3588_7667	A/G	3588	7667	+	NA	R	R	R	R	A	N	R	A	A	R	R	R	A	A	N	A	H	A	A	A	A	A	A	A	A	H	R	R	A	A	R	A	A	N	A	A	A	A	A	R	A	A	A	A
S3589_8894	G/A	3589	8894	+	NA	G	R	R	R	R	G	R	G	G	G	R	H	R	G	G	G	G	G	G	G	G	G	R	G	R	R	G	G	H	G	R	R	R	G	R	G	G	G	G	N	H	G	R	G
S3590_10922	T/C	3590	10922	+	NA	Y	Y	T	T	T	Y	Y	Y	T	Y	Y	T	T	H	T	Y	T	T	T	T	T	T	Y	T	H	T	Y	T	T	T	Y	T	T	T	Y	Y	T	Y	T	T	Y	T	Y	T
S3591_16126	A/T	3591	16126	+	NA	W	W	W	W	A	A	W	A	A	W	W	W	W	W	W	W	W	A	A	W	A	W	A	A	W	W	A	A	H	H	W	A	A	A	A	A	A	W	A	N	A	A	A	A
S3592_9372	A/C	3592	9372	+	NA	M	M	M	M	A	M	M	A	A	M	A	M	A	M	M	M	M	A	A	A	A	M	A	A	A	M	A	M	A	M	M	M	M	A	A	A	A	A	A	H	M	A	A	M
S3594_22889	C/T	3594	22889	+	NA	C	C	C	C	Y	C	C	Y	Y	C	C	C	C	Y	C	Y	C	C	C	Y	C	C	Y	C	C	Y	C	C	Y	Y	C	C	C	C	Y	C	Y	C	Y	Y	C	C	Y	C
S3595_1420	T/G	3595	1420	+	NA	T	K	T	T	K	K	K	K	K	K	K	T	K	T	K	K	K	K	K	K	K	T	T	K	K	T	K	K	K	T	T	K	K	K	T	T	K	T	T	N	K	K	K	K
S3603_899	C/T	3603	899	+	NA	Y	Y	C	C	C	N	H	C	Y	H	Y	C	C	Y	C	Y	N	C	C	Y	C	C	H	Y	Y	C	Y	C	C	C	Y	N	Y	C	Y	C	C	Y	C	C	C	C	Y	Y
S3605_2953	T/C	3605	2953	+	NA	Y	Y	T	Y	Y	T	T	T	Y	T	Y	T	T	N	T	T	T	Y	Y	T	T	T	T	T	Y	H	Y	Y	Y	T	T	T	T	T	T	T	T	T	T	N	T	Y	T	T
S3606_6690	G/A	3606	6690	+	NA	R	R	G	R	R	G	G	G	R	G	R	R	G	G	G	G	G	G	G	G	G	G	R	G	R	R	G	R	R	G	R	R	R	G	G	G	G	G	G	G	R	G	R	G
S3608_7315	T/C	3608	7315	+	NA	Y	Y	T	Y	T	Y	H	T	T	Y	Y	T	T	T	T	T	N	Y	Y	T	T	T	T	T	Y	T	Y	Y	T	T	Y	T	T	T	T	T	T	Y	T	T	N	T	Y	Y
S3609_6135	T/C	3609	6135	+	NA	T	T	Y	T	Y	T	T	Y	Y	T	T	N	Y	Y	T	Y	T	T	T	Y	T	T	Y	T	H	Y	Y	Y	Y	Y	T	T	T	T	T	T	Y	T	Y	N	N	Y	T	T
S3610_25307	G/A	3610	25307	+	NA	R	R	G	R	G	G	R	G	R	H	R	G	G	R	G	G	G	R	R	G	G	R	G	G	R	G	R	R	R	G	G	R	R	G	G	G	R	R	G	R	N	G	R	R
S3616_7905	T/G	3616	7905	+	NA	T	T	H	T	T	K	K	T	T	K	K	K	K	K	K	K	K	T	T	T	K	K	T	T	K	T	T	T	K	K	T	K	T	K	T	T	T	H	T	H	N	T	T	T
S3619_8908	C/A	3619	8908	+	NA	M	C	M	C	M	C	C	M	M	M	C	M	M	C	C	C	C	C	C	C	H	M	M	C	M	C	C	C	M	M	C	N	C	M	C	C	C	M	M	N	M	C	M	C
S3620_3729	T/A	3620	3729	+	NA	W	W	T	T	T	T	W	T	W	W	W	T	T	W	T	W	T	T	T	W	T	T	W	W	W	T	W	T	T	T	W	T	T	T	W	W	T	W	T	T	W	T	W	W
S3622_13132	G/T	3622	13132	+	NA	G	G	G	K	K	K	G	G	K	K	K	G	G	G	H	G	K	G	G	G	K	G	K	K	G	G	G	K	G	G	G	G	K	G	G	K	G	G	G	H	G	G	K	K
S3624_1227	A/G	3624	1227	+	NA	R	R	A	A	A	R	A	A	R	R	R	A	A	R	A	R	A	A	A	R	A	A	R	A	R	A	R	A	A	A	R	A	R	A	R	R	A	R	A	N	R	A	R	R
S3626_5537	G/A	3626	5537	+	NA	G	R	R	R	R	G	R	R	G	G	R	G	R	G	R	G	G	G	G	G	R	R	R	G	R	G	G	G	R	G	R	R	G	R	R	G	G	R	R	G	G	G	G	R
S3627_17523	A/C	3627	17523	+	NA	A	M	A	A	M	A	M	M	M	M	A	A	A	M	A	A	A	A	A	A	A	A	M	A	A	M	A	A	M	M	A	A	A	A	M	M	M	A	M	A	A	A	M	A
S3629_11815	T/C	3629	11815	+	NA	T	Y	Y	Y	Y	Y	Y	Y	T	T	Y	T	Y	T	Y	T	T	T	T	Y	Y	Y	Y	T	T	T	T	T	Y	T	Y	Y	T	Y	Y	T	T	Y	Y	T	T	T	T	Y
S3635_15761	G/A	3635	15761	+	NA	R	G	R	G	R	R	R	R	R	G	G	G	R	R	G	G	G	G	G	G	R	R	R	R	R	G	G	G	R	G	G	R	G	R	G	G	G	R	R	R	R	G	R	G
S3653_16636	C/T	3653	16636	+	NA	Y	Y	Y	Y	C	C	Y	C	C	Y	Y	Y	Y	Y	C	Y	N	C	C	Y	C	Y	C	C	Y	Y	C	Y	Y	C	Y	C	C	N	C	C	C	Y	C	N	H	C	C	C
S3654_5605	T/A	3654	5605	+	NA	T	W	T	T	T	W	W	T	W	W	T	W	W	W	W	T	W	W	W	T	T	T	T	W	T	W	T	T	T	T	T	T	T	T	W	W	W	W	T	T	T	W	W	T
S3656_16264	G/A	3656	16264	+	NA	G	G	G	G	R	G	R	R	R	R	G	G	G	R	G	G	G	G	G	R	G	G	R	G	G	R	G	G	R	R	G	G	G	G	R	G	R	G	R	R	G	G	R	G
S3658_18694	G/C	3658	18694	+	NA	G	S	G	G	S	G	S	S	S	S	G	G	G	S	G	G	G	G	G	G	G	G	H	G	G	H	G	G	S	N	G	G	G	G	S	S	S	G	S	G	G	G	S	G
S3659_3386	T/C	3659	3386	+	NA	T	T	T	Y	Y	H	Y	T	Y	Y	Y	Y	T	T	Y	T	T	T	T	T	Y	T	Y	T	Y	T	T	Y	T	T	Y	H	Y	T	T	Y	T	T	T	N	T	T	T	T
S3665_16184	G/A	3665	16184	+	NA	R	G	R	G	R	R	R	R	R	G	G	G	R	R	G	G	G	G	G	G	R	R	R	R	R	G	G	G	R	G	G	H	G	R	G	G	G	R	R	N	R	G	R	G
S3676_10368	A/T	3676	10368	+	NA	A	A	A	W	W	W	W	A	W	W	W	W	A	A	H	W	W	A	A	A	A	A	W	W	A	A	A	W	A	A	A	W	W	A	A	W	W	A	A	W	A	A	W	W
S3681_10596	C/T	3681	10596	+	NA	Y	Y	Y	Y	C	C	Y	C	C	Y	Y	Y	Y	Y	Y	Y	Y	C	C	Y	C	Y	C	C	Y	Y	C	Y	Y	Y	Y	Y	C	C	C	C	C	Y	C	H	Y	C	C	Y
S3684_19246	G/A	3684	19246	+	NA	G	R	G	G	R	R	R	R	R	R	R	R	R	G	G	R	R	R	R	G	R	G	G	R	R	G	R	R	R	G	G	R	R	G	G	G	R	G	G	G	G	R	G	R
S3687_591	C/A	3687	591	+	NA	C	M	C	C	M	M	C	C	C	C	M	N	M	C	M	M	M	M	M	C	M	C	C	C	C	C	M	M	C	C	C	C	C	C	C	C	C	C	C	N	N	C	M	M
S3688_3776	G/A	3688	3776	+	NA	R	R	R	R	G	R	R	G	G	R	G	R	G	R	R	R	R	G	G	G	G	R	G	G	G	R	G	R	G	R	R	R	R	G	G	G	G	G	G	R	R	G	G	R
S3697_10066	T/C	3697	10066	+	NA	Y	Y	T	Y	Y	T	T	T	T	T	Y	Y	Y	T	T	T	T	T	T	T	T	T	Y	T	Y	Y	T	T	Y	T	Y	Y	Y	T	T	T	T	T	T	T	Y	T	Y	T
S3698_1151	G/T	3698	1151	+	NA	K	H	G	G	G	G	G	G	K	K	K	G	G	K	G	K	G	G	G	G	G	G	K	K	K	G	H	K	G	G	K	N	K	G	K	K	G	K	G	N	G	G	K	K
S3701_14313	C/A	3701	14313	+	NA	C	C	C	M	M	M	M	C	M	M	M	C	C	C	M	C	M	C	C	C	M	C	M	M	C	C	C	M	C	C	M	M	M	C	C	C	C	C	C	C	C	C	C	M
S3704_26044	A/T	3704	26044	+	NA	A	A	W	W	A	A	A	A	A	A	A	W	A	W	A	W	W	A	A	W	W	W	A	A	A	W	W	W	A	W	W	A	W	A	A	A	A	W	A	W	N	W	A	A
S3705_16812	G/T	3705	16812	+	NA	G	G	G	K	K	G	G	G	K	K	K	G	G	G	N	G	G	G	G	G	K	G	G	G	G	G	G	K	G	G	G	K	K	G	G	K	G	G	G	G	G	G	K	K
S3707_6156	T/C	3707	6156	+	NA	Y	Y	Y	Y	T	Y	Y	T	Y	Y	Y	T	T	T	T	T	Y	Y	Y	T	T	Y	T	T	Y	T	Y	Y	T	T	T	Y	Y	T	T	T	Y	Y	T	Y	T	T	Y	Y
S3708_5887	T/A	3708	5887	+	NA	T	T	T	W	W	T	W	T	W	W	W	T	T	T	N	W	W	T	T	T	T	T	W	W	T	T	T	W	T	T	T	N	W	T	T	H	H	T	T	H	T	N	W	W
S3711_3576	T/A	3711	3576	+	NA	W	W	W	W	W	W	W	T	W	W	W	W	T	T	T	T	W	W	W	T	T	W	T	T	T	W	W	W	T	T	W	T	T	T	T	T	W	W	T	W	T	T	W	W
S3713_9704	C/T	3713	9704	+	NA	C	C	C	Y	Y	Y	C	C	C	Y	Y	Y	C	C	C	Y	Y	C	C	C	Y	C	Y	C	Y	Y	C	Y	C	C	Y	C	C	C	Y	Y	C	C	C	N	C	H	C	Y
S3727_5827	T/C	3727	5827	+	NA	T	Y	Y	Y	Y	H	Y	Y	T	T	Y	T	Y	T	Y	T	T	T	T	Y	Y	Y	Y	T	T	T	T	T	Y	T	Y	T	T	T	Y	T	T	Y	Y	T	T	T	T	T
S3729_14450	A/C	3729	14450	+	NA	A	A	A	A	M	A	A	M	M	A	A	A	A	M	A	M	A	A	A	M	A	A	M	A	A	M	A	A	M	M	A	A	A	A	M	A	M	A	M	M	A	A	M	A
S3731_2663	T/C	3731	2663	+	NA	T	T	Y	Y	T	Y	Y	T	T	Y	T	Y	T	Y	Y	Y	Y	T	T	T	T	Y	T	T	T	Y	T	Y	T	Y	Y	Y	Y	T	T	T	T	T	T	Y	T	T	T	T
S3737_7620	T/C	3737	7620	+	NA	T	Y	T	T	Y	Y	Y	Y	T	Y	Y	T	Y	T	T	Y	Y	T	Y	Y	Y	T	T	Y	Y	T	Y	Y	Y	T	T	T	T	Y	T	T	T	T	T	Y	T	T	Y	Y
S3739_4397	C/G	3739	4397	+	NA	C	C	S	S	C	S	C	C	C	C	S	S	C	S	C	S	S	C	C	S	S	S	C	C	C	S	S	S	C	S	S	C	C	C	C	C	C	S	C	S	C	S	C	C
S3740_6564	T/G	3740	6564	+	NA	K	K	K	K	T	T	K	T	K	K	K	K	T	T	T	T	K	K	K	T	T	K	T	T	K	K	K	K	T	T	T	T	T	T	T	T	H	K	T	T	T	T	K	K
S3742_6602	A/G	3742	6602	+	NA	R	A	R	A	R	A	A	R	R	R	A	H	R	R	A	A	R	A	A	A	R	R	R	A	R	A	A	A	H	R	A	A	R	R	A	A	A	R	A	N	A	A	R	H
S3743_10136	G/A	3743	10136	+	NA	G	G	R	R	G	R	R	R	G	G	R	G	R	G	R	G	G	G	G	R	R	G	R	G	G	G	G	G	R	G	R	H	G	R	R	G	G	R	R	G	G	G	G	R
S3744_16445	A/G	3744	16445	+	NA	R	A	R	A	R	A	A	R	R	R	A	R	R	R	A	A	A	A	A	A	R	R	R	A	R	A	A	A	R	R	A	A	R	R	A	A	A	A	A	A	A	A	R	R
S3748_22981	G/A	3748	22981	+	NA	G	G	G	R	R	R	R	G	R	R	R	G	G	G	R	R	G	G	G	G	G	G	R	R	G	G	G	R	G	G	G	R	R	G	G	R	R	G	G	N	G	G	R	R
S3751_7523	T/G	3751	7523	+	NA	T	T	T	K	K	K	T	T	K	K	K	T	T	T	K	T	H	T	T	T	K	T	K	K	T	T	T	K	T	T	T	H	K	T	T	K	T	T	T	T	T	T	T	K
S3764_973	A/G	3764	973	+	NA	R	R	A	R	A	A	R	A	R	R	R	A	A	R	A	A	R	R	R	A	A	R	A	A	R	A	R	R	R	A	A	R	R	A	A	A	R	R	A	A	R	A	A	R
S3769_2885	C/T	3769	2885	+	NA	C	Y	C	C	Y	Y	Y	Y	Y	Y	Y	C	Y	C	C	Y	Y	Y	Y	C	Y	C	Y	Y	Y	C	Y	Y	Y	C	C	Y	Y	C	Y	H	Y	C	Y	C	C	Y	C	Y
S3779_31183	C/T	3779	31183	+	NA	C	C	Y	Y	C	Y	C	C	C	C	C	Y	C	Y	Y	Y	Y	C	C	C	C	Y	C	C	C	Y	Y	Y	C	Y	Y	Y	Y	C	C	C	C	C	C	H	C	Y	C	C
S3783_17785	A/T	3783	17785	+	NA	A	W	A	W	W	A	W	A	W	W	W	A	A	A	A	W	W	A	A	A	A	A	W	W	A	A	A	W	A	A	A	W	A	A	A	A	W	A	A	A	A	A	W	W
S3796_7560	A/T	3796	7560	+	NA	A	W	A	A	W	W	W	W	W	W	W	N	W	A	W	W	N	A	W	H	W	A	A	H	A	A	W	W	W	A	A	A	A	A	A	A	A	A	A	W	A	W	W	W
S3803_20368	T/A	3803	20368	+	NA	W	T	W	W	W	T	T	T	T	W	W	W	W	T	T	W	T	T	T	W	T	W	T	T	W	H	T	W	W	T	T	H	W	T	T	T	T	W	T	T	N	W	T	T
S3818_5846	G/A	3818	5846	+	NA	G	G	G	G	R	G	G	R	R	G	G	G	G	R	G	R	G	G	G	R	G	G	R	G	G	R	G	G	R	R	G	G	G	G	R	G	R	G	R	R	G	G	R	G
S3822_14050	T/C	3822	14050	+	NA	H	Y	Y	Y	T	H	Y	T	Y	Y	Y	Y	T	T	T	T	H	H	Y	T	T	Y	T	T	H	Y	H	Y	T	T	T	N	T	N	T	T	Y	Y	T	Y	N	T	T	Y
S3823_12888	G/A	3823	12888	+	NA	R	R	G	R	R	G	G	G	R	G	R	R	G	G	G	G	G	R	R	G	G	G	R	G	R	R	R	R	R	G	R	G	R	G	G	R	G	G	G	N	H	G	R	G
S3830_12518	T/G	3830	12518	+	NA	T	T	T	T	K	T	K	K	H	K	T	T	T	K	T	T	T	T	T	K	T	T	K	T	T	K	T	T	K	K	T	T	T	T	K	K	K	T	K	K	T	T	K	T
S3838_9911	T/G	3838	9911	+	NA	K	K	K	K	T	T	K	T	T	H	K	K	K	K	K	K	H	T	T	K	T	K	T	T	K	K	T	K	K	K	H	T	T	T	T	T	T	K	T	N	T	T	T	K
S3841_13521	A/G	3841	13521	+	NA	R	R	R	R	A	R	R	A	R	R	R	R	A	A	A	A	R	R	R	A	A	R	A	A	R	A	R	R	A	A	A	N	A	A	A	A	R	R	A	R	A	A	R	R
S3846_15897	A/G	3846	15897	+	NA	R	R	R	R	A	R	R	A	R	R	R	R	A	A	A	A	R	R	R	A	A	R	A	A	R	R	R	R	A	A	A	R	A	A	A	A	R	R	A	R	A	A	R	R
S3851_19176	G/A	3851	19176	+	NA	R	R	G	G	G	G	R	G	R	G	R	G	G	R	G	R	G	G	G	R	G	G	R	R	H	G	R	G	G	G	R	G	R	G	R	R	G	R	G	G	R	G	R	R
S3852_4149	C/T	3852	4149	+	NA	C	Y	Y	Y	Y	C	Y	C	C	Y	Y	C	Y	C	C	C	C	C	C	C	C	C	Y	C	Y	Y	C	C	Y	C	Y	C	Y	C	Y	C	C	C	C	N	Y	C	Y	C
S3859_22431	G/A	3859	22431	+	NA	R	G	R	G	R	G	G	R	R	H	G	R	R	G	G	G	R	G	G	G	R	R	G	G	R	G	G	G	R	R	G	N	R	G	G	G	G	R	G	N	H	G	R	R
S3862_1629	A/G	3862	1629	+	NA	R	R	A	A	A	R	R	A	R	R	R	A	A	R	A	R	A	A	A	R	A	A	R	A	R	A	R	A	A	A	R	A	A	A	R	A	A	R	A	A	A	A	R	A
S3868_5633	C/A	3868	5633	+	NA	M	H	C	C	C	C	C	C	M	M	M	C	C	M	C	M	C	C	C	M	C	C	M	M	M	C	M	M	C	C	C	C	M	C	M	M	C	M	C	C	C	C	M	M
S3876_12596	G/A	3876	12596	+	NA	G	G	R	G	R	R	G	R	G	R	G	R	R	R	R	R	R	G	G	G	R	R	G	G	R	G	G	G	R	R	G	G	G	R	G	G	G	R	G	G	G	G	G	G
S3883_6840	G/A	3883	6840	+	NA	R	G	H	R	G	G	G	G	G	R	R	N	R	G	G	R	G	G	G	R	G	R	G	G	R	R	G	R	R	N	R	N	G	G	G	G	G	G	G	H	N	G	G	G
S3885_16408	T/A	3885	16408	+	NA	W	W	W	T	T	W	W	T	T	W	T	W	T	W	W	W	W	T	T	T	T	T	T	T	T	T	T	W	T	W	W	H	W	T	T	T	T	T	T	H	W	T	T	W
S3890_4106	T/C	3890	4106	+	NA	T	Y	H	Y	Y	T	T	T	T	Y	Y	T	T	T	T	T	T	T	T	T	T	T	Y	T	Y	Y	T	T	Y	T	Y	Y	Y	N	Y	T	T	T	T	T	Y	T	Y	T
S3895_9743	T/C	3895	9743	+	NA	T	T	T	Y	Y	Y	T	T	T	T	Y	T	T	T	T	Y	Y	T	T	T	Y	T	Y	T	Y	Y	T	Y	T	T	Y	T	T	T	Y	Y	T	Y	T	T	T	Y	T	Y
S3900_9579	G/A	3900	9579	+	NA	G	R	G	G	G	N	H	G	R	R	G	H	H	N	H	G	G	N	R	G	G	G	R	H	G	R	G	G	G	G	G	G	G	G	R	R	R	R	G	N	G	R	R	G
S3903_8296	C/T	3903	8296	+	NA	Y	Y	H	Y	C	Y	Y	C	C	H	C	H	C	Y	Y	Y	H	C	C	C	C	Y	C	C	C	Y	C	Y	C	Y	Y	Y	Y	C	C	C	C	C	C	H	N	C	C	Y
S3908_16550	T/G	3908	16550	+	NA	K	K	T	T	T	H	K	T	K	K	H	T	T	T	T	K	T	N	T	K	T	T	K	K	K	T	H	T	T	T	T	T	K	T	K	T	T	K	T	T	H	N	K	K
S3916_7390	A/G	3916	7390	+	NA	A	A	A	A	R	A	A	R	R	A	A	A	A	A	A	R	A	A	A	R	A	A	H	A	A	R	A	A	R	R	A	A	A	A	R	A	R	A	A	R	A	A	R	A
S3917_15853	G/A	3917	15853	+	NA	G	R	R	R	R	G	R	G	G	G	R	R	R	G	G	G	G	G	G	G	G	G	R	G	R	R	G	G	R	G	R	R	R	G	R	G	G	G	G	G	R	G	R	G
S3920_7236	T/C	3920	7236	+	NA	T	T	T	Y	Y	Y	Y	T	Y	Y	Y	Y	T	T	Y	T	Y	T	T	T	Y	T	Y	Y	Y	T	T	Y	T	T	Y	T	Y	T	Y	Y	T	T	T	Y	T	T	T	Y
S3921_6175	G/C	3921	6175	+	NA	S	S	S	S	G	S	S	G	S	S	S	S	G	G	G	G	S	S	S	G	G	S	G	G	S	S	S	S	G	G	G	S	G	G	G	G	S	S	G	S	G	G	S	S
S3923_9158	C/G	3923	9158	+	NA	C	C	C	S	S	C	C	C	C	S	S	S	C	C	S	C	S	C	C	C	S	C	H	C	C	H	C	S	C	C	S	S	S	C	S	H	C	C	C	N	C	C	C	S
S3925_10160	G/T	3925	10160	+	NA	K	K	K	K	G	G	K	G	G	K	G	K	G	K	K	K	K	G	G	G	G	K	G	G	G	G	G	K	G	K	K	K	K	G	G	G	G	G	G	H	H	G	G	K
S3927_17827	G/C	3927	17827	+	NA	G	S	G	G	G	S	S	G	S	S	G	H	S	G	G	G	G	S	S	G	G	G	S	G	G	S	G	G	G	G	G	G	G	N	N	S	S	S	G	N	G	N	S	G
S3930_9519	A/C	3930	9519	+	NA	M	M	M	M	A	A	M	A	A	H	M	A	M	M	A	A	A	A	A	M	A	M	A	A	M	H	A	M	M	H	A	N	A	A	A	A	A	M	A	N	A	A	A	M
S3932_6886	T/G	3932	6886	+	NA	T	K	T	T	K	K	K	K	K	K	K	T	K	T	K	K	K	K	K	T	K	T	T	K	K	T	K	K	K	T	T	K	K	K	T	T	K	T	T	K	T	K	K	K
S3933_5375	A/C	3933	5375	+	NA	M	M	M	M	A	A	M	A	A	M	M	M	M	M	A	M	A	A	A	M	A	M	A	A	M	M	A	M	M	M	M	M	A	A	A	A	A	M	A	M	M	A	A	M
S3935_3491	A/C	3935	3491	+	NA	M	M	M	M	A	A	M	A	A	M	M	M	M	M	H	M	M	A	A	A	A	A	A	A	M	M	A	A	M	M	M	A	A	A	A	A	A	A	A	A	A	A	A	A
S3937_9954	A/T	3937	9954	+	NA	W	W	W	W	A	W	W	A	W	W	W	H	A	A	A	A	W	W	W	A	A	W	A	A	W	W	W	W	A	A	A	H	A	A	A	A	W	W	A	H	A	A	W	W
S3938_7382	G/A	3938	7382	+	NA	G	R	G	G	R	R	R	R	G	G	R	G	R	G	R	R	N	R	R	R	R	G	G	R	H	G	R	R	R	G	G	G	G	H	G	G	G	G	G	R	G	R	R	R
S3939_8805	T/C	3939	8805	+	NA	T	T	T	T	Y	T	Y	Y	Y	T	T	T	T	Y	T	Y	T	T	T	Y	T	T	Y	T	T	Y	T	T	Y	Y	T	T	T	T	Y	T	Y	T	Y	Y	T	T	Y	T
S3941_14129	A/G	3941	14129	+	NA	A	R	A	A	A	R	R	A	R	R	A	R	R	R	R	A	R	R	R	A	A	A	R	R	A	R	A	A	A	A	A	A	A	A	R	R	R	R	A	N	A	R	R	A
S3942_2565	T/C	3942	2565	+	NA	Y	Y	Y	Y	T	T	Y	T	T	Y	Y	Y	Y	Y	T	Y	T	T	T	Y	T	Y	T	T	Y	Y	T	Y	Y	Y	Y	Y	T	T	T	T	T	Y	T	H	Y	T	T	Y
S3944_6092	T/A	3944	6092	+	NA	T	W	T	T	W	W	W	W	W	W	W	W	W	T	T	W	W	W	W	T	W	T	T	H	W	T	W	W	W	T	T	W	W	W	T	T	W	T	T	W	T	W	W	W
S3945_5874	C/A	3945	5874	+	NA	C	M	M	M	M	C	M	C	C	C	M	H	M	C	C	C	C	C	C	C	C	C	M	C	H	M	C	C	M	C	M	N	M	C	M	C	C	C	C	C	N	C	M	C
S3948_11398	A/G	3948	11398	+	NA	R	A	R	A	R	A	A	R	R	R	A	R	R	R	A	A	R	A	A	A	R	R	R	A	R	A	A	A	R	R	A	N	R	R	A	A	A	R	A	R	A	A	R	R
S3949_29381	A/G	3949	29381	+	NA	A	A	A	R	R	A	R	A	R	H	R	R	A	A	R	A	R	A	A	A	R	A	R	H	A	R	A	R	A	A	R	R	R	A	R	R	A	A	A	R	A	A	A	R
S3958_5840	G/A	3958	5840	+	NA	G	R	G	G	G	G	R	R	R	R	R	G	G	R	G	R	R	G	G	R	G	G	R	R	R	G	R	G	G	G	H	N	G	G	R	R	G	R	G	G	N	R	R	R
S3959_2572	C/T	3959	2572	+	NA	C	Y	C	C	C	C	Y	Y	Y	Y	C	C	C	Y	C	C	C	Y	Y	C	C	C	Y	C	C	C	C	C	Y	Y	C	C	C	C	Y	Y	Y	C	Y	H	C	C	Y	C
S3960_15199	G/A	3960	15199	+	NA	G	R	G	G	R	R	R	R	R	R	R	G	R	G	R	R	R	H	R	R	R	G	G	R	R	G	R	R	R	G	G	R	G	R	G	G	R	G	G	R	R	R	R	R
S3961_3105	T/C	3961	3105	+	NA	Y	T	Y	T	Y	T	T	Y	Y	Y	T	Y	Y	Y	T	T	H	T	T	T	Y	Y	T	T	Y	T	T	T	Y	Y	T	T	Y	Y	T	T	T	T	T	N	N	T	Y	Y
S3963_5753	T/C	3963	5753	+	NA	T	Y	T	T	Y	N	Y	H	Y	Y	Y	T	Y	T	Y	Y	Y	H	Y	Y	Y	T	T	Y	H	T	Y	Y	T	T	T	T	T	Y	T	T	Y	T	T	Y	H	H	Y	Y
S3964_16615	A/G	3964	16615	+	NA	A	A	A	R	R	R	A	A	R	R	R	A	A	A	R	A	H	A	A	A	A	A	R	R	A	A	A	R	A	A	A	R	R	A	A	R	A	A	A	H	A	A	R	R
S3966_11274	T/C	3966	11274	+	NA	T	Y	Y	Y	Y	T	Y	Y	T	T	Y	T	Y	T	Y	T	T	T	T	Y	Y	Y	Y	T	Y	T	T	T	Y	T	Y	Y	T	Y	Y	T	T	Y	Y	T	T	T	T	Y
S3968_6401	A/G	3968	6401	+	NA	H	A	R	R	A	A	R	A	A	R	R	R	R	A	R	R	R	A	A	R	A	R	A	A	R	R	A	R	R	R	H	H	A	N	A	A	A	R	A	H	A	A	A	R
S3974_8057	A/G	3974	8057	+	NA	A	R	A	A	A	R	R	A	R	A	A	R	R	R	A	A	R	A	A	A	A	A	R	R	A	A	R	A	A	A	A	A	A	A	R	R	R	R	A	A	A	R	R	A
S3978_4219	C/T	3978	4219	+	NA	Y	C	Y	C	Y	C	C	Y	Y	Y	C	Y	Y	Y	C	C	C	C	C	C	Y	Y	Y	C	Y	C	C	C	Y	Y	C	Y	Y	Y	C	C	C	Y	C	Y	Y	C	Y	C
S3979_19411	T/G	3979	19411	+	NA	T	T	K	K	T	K	K	T	T	K	T	K	T	K	K	K	K	T	T	T	T	K	T	T	T	K	T	K	T	K	K	K	K	T	T	T	T	T	T	K	K	T	T	K
S3984_27100	T/C	3984	27100	+	NA	T	Y	T	T	Y	H	Y	Y	T	T	Y	T	Y	T	Y	Y	Y	T	Y	Y	Y	T	T	Y	Y	T	Y	Y	H	T	T	Y	T	H	T	T	T	T	T	Y	T	Y	Y	Y
S3986_3906	T/A	3986	3906	+	NA	T	W	T	W	W	W	W	W	T	T	W	T	T	T	T	W	W	T	W	W	W	T	T	W	W	T	W	W	W	T	T	H	T	W	T	T	T	T	T	N	T	W	W	W
S3989_13340	G/A	3989	13340	+	NA	R	R	R	R	G	G	R	G	G	R	R	G	R	R	G	R	G	G	G	R	G	R	G	G	R	R	G	R	R	R	R	G	G	G	G	G	G	R	G	G	R	G	G	R
S3995_22581	G/A	3995	22581	+	NA	G	R	G	G	R	R	R	R	R	R	R	R	R	G	G	R	R	R	R	G	R	G	G	R	G	N	R	R	R	G	G	R	R	G	G	G	R	G	G	R	G	R	G	R
S3999_8237	T/C	3999	8237	+	NA	T	Y	T	T	T	Y	Y	T	Y	Y	T	Y	Y	T	Y	T	Y	T	Y	T	T	T	Y	Y	T	Y	T	T	T	T	T	N	T	T	Y	Y	Y	Y	T	T	T	Y	Y	T
S4003_17114	G/A	4003	17114	+	NA	R	G	G	G	R	G	G	G	R	R	G	R	R	R	G	G	H	G	G	G	R	R	R	G	R	G	G	G	R	R	G	G	R	R	G	G	G	R	G	N	H	G	R	R
S4007_16016	T/G	4007	16016	+	NA	T	K	T	T	T	T	K	K	T	K	T	T	T	K	T	T	T	K	K	T	T	T	K	T	T	T	T	T	K	K	T	N	T	T	K	K	K	T	K	H	T	T	T	T
S4009_3067	A/G	4009	3067	+	NA	R	R	A	A	A	R	A	A	R	R	R	A	A	R	A	R	A	A	A	A	A	A	R	R	R	A	R	A	A	A	R	A	R	A	R	R	A	R	A	N	A	A	R	H
S4020_13932	G/A	4020	13932	+	NA	R	G	G	G	R	G	G	R	R	R	G	R	R	R	G	G	H	G	G	G	R	R	R	G	R	G	G	G	G	R	G	G	R	R	G	G	G	R	G	N	R	G	R	R
S4023_8811	A/G	4023	8811	+	NA	A	A	A	R	R	R	A	A	R	R	R	A	A	A	R	A	R	A	A	A	R	A	R	R	A	A	A	R	A	A	A	R	R	A	A	R	A	A	A	R	N	A	R	R
S4031_1931	C/T	4031	1931	+	NA	C	Y	C	C	C	C	Y	C	Y	Y	C	Y	C	Y	Y	C	Y	Y	Y	C	C	C	C	Y	C	Y	C	C	C	C	C	C	C	C	C	C	Y	Y	C	C	C	Y	C	C
S4033_8269	T/C	4033	8269	+	NA	Y	Y	T	T	Y	T	Y	T	H	Y	Y	Y	T	T	N	Y	T	T	T	Y	Y	T	T	T	Y	Y	Y	Y	Y	Y	Y	H	Y	T	T	T	T	Y	T	T	T	T	T	Y
S4034_15810	T/A	4034	15810	+	NA	W	W	W	W	T	W	W	T	T	W	W	W	T	T	T	T	W	T	T	T	T	T	T	T	W	W	W	W	T	T	W	T	T	T	T	T	T	T	T	W	T	T	T	T
S4041_3340	G/T	4041	3340	+	NA	K	K	K	K	G	G	K	G	K	K	K	G	G	G	G	G	G	K	K	G	G	K	G	G	K	G	K	K	G	G	G	H	K	G	G	G	K	K	G	H	G	G	K	K
S4046_14583	C/G	4046	14583	+	NA	S	C	S	S	C	C	S	C	C	S	S	C	S	S	C	S	C	C	C	S	C	S	C	C	S	S	C	S	C	S	C	S	C	C	C	C	C	S	C	C	C	S	C	S
S4047_519	G/C	4047	519	+	NA	G	G	G	G	S	G	G	S	S	G	G	G	S	S	G	S	G	G	G	S	G	G	S	G	G	S	S	G	S	S	G	G	G	G	S	G	S	G	S	G	G	G	S	G
S4049_2347	C/T	4049	2347	+	NA	Y	Y	C	C	Y	C	C	C	Y	Y	Y	C	C	Y	C	Y	C	C	C	Y	C	C	Y	C	Y	C	Y	Y	Y	C	Y	C	Y	C	Y	H	C	Y	C	C	Y	C	Y	Y
S4060_5808	T/C	4060	5808	+	NA	T	T	T	T	Y	T	T	Y	Y	T	T	T	T	Y	T	Y	T	T	T	Y	T	T	Y	T	T	Y	T	T	Y	Y	T	T	T	T	Y	T	Y	T	Y	Y	T	T	Y	T
S4062_7454	A/G	4062	7454	+	NA	A	R	R	R	A	A	R	A	A	A	R	R	R	A	A	A	A	A	A	A	A	A	R	A	R	R	A	A	A	A	R	R	R	A	A	A	A	A	A	A	R	A	A	A
S4068_20392	G/T	4068	20392	+	NA	G	K	G	G	G	K	K	G	K	K	G	G	K	K	K	G	K	K	K	G	G	G	K	K	G	K	K	G	G	G	G	G	G	G	K	K	K	K	G	G	G	K	K	G
S4072_14538	A/G	4072	14538	+	NA	A	A	A	A	R	A	A	R	R	A	A	A	R	R	A	R	A	A	A	R	A	A	R	A	A	R	R	R	R	R	A	A	A	A	A	A	R	A	R	R	A	R	A	A
S4076_24880	G/A	4076	24880	+	NA	G	R	R	R	R	R	R	G	G	G	R	G	R	G	G	G	G	G	G	R	R	R	R	G	G	G	G	G	R	G	R	N	G	R	R	G	G	R	R	G	G	G	G	R
S4077_6703	A/G	4077	6703	+	NA	A	R	R	R	R	N	R	R	A	A	R	A	R	A	R	A	A	A	A	R	R	A	R	A	A	A	A	A	R	A	R	A	A	H	R	A	A	R	R	N	A	A	A	R
S4079_12676	C/T	4079	12676	+	NA	C	Y	C	C	Y	Y	Y	Y	Y	H	Y	C	Y	C	H	Y	Y	Y	Y	Y	Y	C	C	Y	Y	C	Y	Y	Y	C	C	Y	Y	Y	C	C	Y	C	C	H	Y	Y	Y	Y
S4081_11978	A/G	4081	11978	+	NA	A	R	A	A	R	R	R	R	R	R	R	R	R	A	R	R	R	R	R	A	R	A	A	R	R	A	R	R	R	A	A	R	R	R	A	A	R	A	A	R	A	R	R	R
S4088_9005	G/A	4088	9005	+	NA	G	R	R	R	R	H	R	H	G	G	R	G	R	G	R	G	G	G	G	R	R	R	R	G	G	G	G	G	R	N	R	R	G	H	R	G	G	R	R	N	G	G	G	R
S4092_3071	G/A	4092	3071	+	NA	R	R	R	R	G	G	N	G	G	R	R	H	R	R	N	R	G	G	G	R	G	R	G	G	R	R	G	G	R	G	R	N	G	G	G	G	G	R	G	N	G	G	G	G
S4093_13436	T/G	4093	13436	+	NA	T	K	T	T	T	K	K	T	K	T	T	T	K	K	K	T	T	T	T	T	T	T	K	K	T	K	K	T	T	T	T	T	T	T	K	K	K	K	T	T	T	K	K	T
S4098_10509	G/A	4098	10509	+	NA	G	R	G	G	R	G	R	R	R	R	G	G	G	H	G	G	G	G	G	G	G	G	R	G	G	R	G	G	R	R	G	G	G	G	R	R	R	G	R	G	G	G	R	G
S4099_10202	T/C	4099	10202	+	NA	T	Y	T	T	T	T	Y	T	Y	Y	T	Y	Y	Y	Y	T	Y	Y	Y	T	T	T	Y	Y	T	Y	T	T	T	T	T	T	T	T	Y	Y	Y	Y	T	T	T	Y	Y	T
S4105_6755	G/A	4105	6755	+	NA	G	G	R	R	G	R	G	R	G	G	R	R	R	G	R	G	G	G	G	R	G	G	R	G	G	R	R	G	R	G	R	R	G	G	R	G	G	R	R	G	G	G	G	R
S4114_1646	G/A	4114	1646	+	NA	R	R	R	R	G	R	R	G	R	R	R	G	G	G	G	G	G	R	R	G	G	R	G	G	H	G	R	R	G	G	G	R	R	G	G	G	R	R	G	R	G	G	R	R
S4115_4149	A/T	4115	4149	+	NA	A	A	W	W	A	W	W	A	A	W	A	W	A	W	W	W	W	A	A	A	A	W	A	A	A	W	A	W	A	W	W	W	W	A	A	A	A	A	A	W	W	A	A	A
S4127_24549	T/G	4127	24549	+	NA	T	T	T	K	K	K	K	T	K	K	K	T	T	T	K	T	K	T	T	T	K	T	K	K	T	T	T	K	T	T	T	K	K	T	T	K	T	T	T	K	T	T	T	K
S4136_6847	C/T	4136	6847	+	NA	Y	Y	Y	Y	C	C	Y	C	C	Y	Y	Y	Y	Y	Y	Y	Y	C	C	Y	C	Y	C	C	Y	Y	C	Y	Y	Y	Y	Y	C	C	C	C	C	Y	C	Y	Y	C	C	Y
S4139_7480	C/G	4139	7480	+	NA	S	S	C	S	S	S	C	C	S	C	S	C	C	S	C	C	C	S	S	C	C	C	C	C	S	S	S	S	S	C	C	S	S	C	C	C	C	C	C	N	S	S	C	C
S4146_22132	T/A	4146	22132	+	NA	W	T	H	T	W	T	T	W	W	W	T	W	W	W	N	T	T	T	T	T	W	W	W	T	W	T	T	T	W	T	T	W	H	W	T	T	T	W	T	W	H	N	W	T
S4149_3661	A/G	4149	3661	+	NA	A	R	A	A	A	A	A	A	A	R	A	R	A	R	R	A	R	R	R	A	R	A	A	A	A	R	A	A	A	A	A	R	R	R	A	A	A	R	A	A	A	R	A	A
S4166_2221	C/G	4166	2221	+	NA	C	S	C	S	S	C	S	N	C	C	S	H	S	C	C	C	C	C	C	C	C	C	C	C	N	S	C	C	S	C	S	S	C	C	C	C	C	C	C	N	S	C	S	C
S4170_3155	T/C	4170	3155	+	NA	Y	Y	Y	Y	T	N	Y	T	T	Y	T	T	T	Y	Y	Y	T	N	T	T	T	Y	T	T	T	Y	T	Y	T	H	Y	Y	Y	T	T	T	T	T	T	N	Y	T	T	Y
S4171_1028	C/T	4171	1028	+	NA	Y	Y	C	C	C	Y	Y	C	Y	Y	Y	C	C	Y	C	Y	C	C	C	Y	C	C	Y	Y	Y	C	Y	C	C	C	Y	C	Y	C	Y	Y	C	Y	C	C	Y	C	Y	Y
S4175_8583	A/G	4175	8583	+	NA	R	R	R	R	A	R	R	A	A	R	A	R	A	R	R	R	R	A	A	A	A	R	A	A	A	A	A	R	A	R	R	R	R	A	A	A	A	A	A	A	R	A	A	R
S4178_14126	A/G	4178	14126	+	NA	R	R	N	R	A	A	A	A	A	H	R	N	R	A	A	R	A	A	A	R	A	R	A	A	R	A	A	R	R	N	R	R	A	A	A	A	N	R	A	N	A	A	A	R
S4179_5626	T/A	4179	5626	+	NA	T	W	W	T	T	H	W	T	W	W	T	W	W	W	H	T	W	T	T	T	T	T	W	H	T	W	W	T	T	T	T	N	T	T	W	W	T	W	T	T	T	W	W	T
S4185_8564	A/T	4185	8564	+	NA	A	W	A	A	W	A	W	A	W	W	W	A	A	A	A	W	W	A	A	A	A	A	W	W	A	A	A	W	A	A	A	A	A	A	A	A	W	A	W	A	A	A	W	A
S4186_22093	T/A	4186	22093	+	NA	T	T	T	W	W	W	W	T	W	W	W	W	T	T	W	T	W	T	T	T	W	T	W	W	W	T	T	W	T	T	W	W	W	T	W	W	T	T	T	W	T	T	T	W
S4197_14746	C/T	4197	14746	+	NA	C	C	C	Y	Y	Y	Y	C	Y	Y	Y	Y	C	C	Y	C	Y	C	C	C	Y	C	Y	Y	Y	C	C	Y	C	C	Y	Y	Y	C	Y	Y	C	C	C	Y	C	C	C	Y
S4200_1234	A/G	4200	1234	+	NA	R	R	A	A	R	A	A	A	R	R	R	A	A	R	A	R	A	A	A	R	A	A	R	A	R	A	R	R	R	A	R	R	R	A	R	R	A	R	A	A	R	A	R	R
S4204_7565	G/A	4204	7565	+	NA	G	R	R	R	R	G	R	R	G	G	R	G	R	G	R	G	G	G	G	R	R	R	R	G	G	G	G	G	R	G	R	R	G	R	R	G	G	R	R	G	G	G	G	R
S4208_7524	T/C	4208	7524	+	NA	Y	T	Y	T	Y	T	T	Y	Y	Y	T	Y	Y	T	T	T	Y	T	T	T	Y	Y	Y	T	Y	T	T	T	Y	Y	T	H	Y	Y	T	T	T	Y	T	T	T	T	Y	Y
S4220_17190	C/A	4220	17190	+	NA	C	C	C	M	M	M	M	C	M	M	M	C	C	C	M	C	M	C	C	C	M	C	H	M	C	C	C	M	C	C	C	N	M	C	C	M	C	C	C	M	C	C	C	M
S4229_16929	C/T	4229	16929	+	NA	Y	Y	C	C	C	Y	Y	Y	Y	Y	Y	C	C	Y	C	Y	C	C	C	Y	C	C	Y	Y	Y	C	Y	C	C	C	Y	C	C	C	Y	Y	C	C	C	N	C	C	Y	C
S4231_25294	A/G	4231	25294	+	NA	A	A	R	R	A	A	R	A	A	R	A	R	A	R	R	R	R	A	A	A	A	R	A	A	R	R	A	R	A	R	R	A	R	A	A	A	A	A	A	A	N	A	A	R
S4243_5718	A/C	4243	5718	+	NA	A	M	A	A	M	M	A	M	M	M	M	A	M	A	A	M	M	M	M	A	M	A	A	A	M	A	M	M	M	A	A	M	M	A	A	A	M	A	A	N	A	M	A	M
S4246_12793	A/G	4246	12793	+	NA	A	A	R	A	R	R	A	A	A	R	A	A	R	A	A	R	R	A	A	A	A	A	A	R	R	A	R	R	A	A	A	A	A	A	A	A	R	A	R	R	A	A	A	A
S4248_15132	A/G	4248	15132	+	NA	A	A	A	R	R	R	R	A	R	R	R	A	A	A	R	A	R	A	A	A	R	A	R	R	A	A	A	R	A	A	A	R	R	A	A	R	A	A	A	R	A	A	A	R
S4262_16330	A/C	4262	16330	+	NA	M	M	A	A	M	A	A	A	M	M	M	M	A	A	A	M	A	A	A	M	A	A	M	A	M	M	M	M	M	A	A	M	M	A	M	M	A	M	A	H	N	A	M	M
S4263_46365	T/C	4263	46365	+	NA	Y	Y	T	T	Y	T	Y	T	Y	Y	Y	Y	T	T	T	Y	T	T	T	Y	Y	T	T	T	Y	H	Y	Y	Y	Y	T	T	Y	T	T	T	T	Y	T	Y	T	T	T	Y
S4264_33150	T/A	4264	33150	+	NA	W	W	W	W	T	T	W	T	T	W	W	W	W	W	T	W	W	T	T	W	T	W	T	T	W	W	T	W	W	W	W	W	T	T	T	T	T	W	T	N	W	T	T	W
S4267_1780	A/G	4267	1780	+	NA	A	R	A	A	R	R	R	A	R	A	A	R	A	R	R	R	R	A	A	R	A	A	R	R	A	A	R	A	A	A	A	A	A	A	R	R	R	R	A	A	A	R	R	A
S4273_2964	G/C	4273	2964	+	NA	G	G	G	S	G	S	G	G	S	S	S	G	G	G	H	G	S	G	G	G	S	G	S	S	G	G	G	S	G	G	G	S	G	G	G	S	G	G	G	G	G	G	G	S
S4274_10009	G/A	4274	10009	+	NA	G	R	G	R	G	R	R	R	G	G	G	G	G	G	R	R	R	R	R	R	R	G	G	R	R	G	R	R	R	G	G	G	G	R	G	G	G	G	G	R	G	R	R	G
S4275_25140	A/G	4275	25140	+	NA	R	R	R	R	A	A	R	A	R	R	R	R	A	A	A	A	R	R	R	A	A	R	A	A	R	R	R	R	A	A	A	R	A	A	A	A	R	R	A	R	A	A	R	R
S4277_9374	C/A	4277	9374	+	NA	C	C	C	C	M	C	M	M	M	M	C	C	C	M	C	C	C	C	C	M	C	C	M	C	C	M	C	C	M	M	C	C	C	C	M	M	M	C	M	M	C	C	M	C
S4281_27513	T/C	4281	27513	+	NA	T	Y	T	T	T	T	Y	Y	Y	Y	T	T	T	Y	T	T	T	Y	Y	T	T	T	Y	T	T	T	T	T	Y	T	T	T	T	T	Y	Y	Y	T	Y	Y	T	Y	T	T
S4284_14389	T/G	4284	14389	+	NA	T	K	T	T	T	T	K	K	K	K	T	T	T	K	T	T	T	K	K	T	T	T	K	T	T	T	T	T	K	K	T	T	T	T	K	K	K	T	K	T	T	T	K	T
S4287_12606	G/A	4287	12606	+	NA	G	R	G	G	G	N	R	G	R	G	R	G	G	H	G	R	N	G	G	R	G	G	R	R	H	G	R	G	G	G	R	G	G	G	R	R	G	R	G	G	G	G	R	R
S4288_19480	T/C	4288	19480	+	NA	Y	Y	Y	Y	T	Y	Y	T	Y	Y	Y	Y	T	T	T	T	Y	Y	Y	T	T	Y	T	T	T	Y	Y	Y	T	T	T	H	T	T	T	T	T	Y	T	Y	T	T	Y	Y
S4290_6797	A/C	4290	6797	+	NA	A	M	A	A	A	A	H	M	M	M	M	A	A	A	A	M	A	A	A	M	A	A	M	M	M	A	M	A	A	A	M	N	A	A	M	M	A	M	A	A	H	A	M	M
S4300_17466	T/G	4300	17466	+	NA	T	T	T	T	K	T	K	K	K	K	T	T	T	K	T	T	T	T	T	K	T	T	K	T	T	K	T	T	K	K	T	T	T	T	K	K	K	T	K	K	T	T	K	T
S4301_25293	C/T	4301	25293	+	NA	C	Y	C	C	Y	C	Y	Y	Y	Y	C	C	C	Y	C	C	C	C	C	C	C	C	Y	C	C	Y	C	C	Y	Y	C	C	C	C	Y	Y	Y	C	Y	Y	C	C	Y	C
S4307_12741	C/A	4307	12741	+	NA	C	M	M	M	M	C	M	M	C	C	M	C	M	C	C	C	C	C	C	M	M	M	M	C	C	C	C	C	M	C	M	M	C	M	M	C	C	M	M	C	C	C	C	M
S4308_7992	C/G	4308	7992	+	NA	S	S	C	C	S	C	S	C	S	S	S	C	C	C	C	S	C	C	C	C	S	C	C	C	S	S	S	S	S	C	S	H	S	C	C	C	C	S	C	C	C	C	C	S
S4311_9707	C/A	4311	9707	+	NA	M	M	M	M	C	C	M	C	C	M	M	M	M	M	C	M	M	C	C	M	C	M	C	C	M	M	C	M	M	M	M	M	C	C	C	C	C	M	C	M	M	C	C	M
S4329_13665	T/G	4329	13665	+	NA	K	K	K	K	T	T	K	T	T	H	K	T	K	K	T	K	T	T	T	K	T	T	T	T	H	K	T	K	K	K	K	H	T	T	T	T	T	K	N	H	N	T	T	T
S4330_15870	A/G	4330	15870	+	NA	A	A	A	R	R	R	A	A	R	R	R	A	A	A	R	A	R	A	A	A	R	A	H	R	A	A	A	R	A	A	A	A	R	A	A	R	A	A	A	N	A	A	R	R
S4332_1333	T/C	4332	1333	+	NA	Y	Y	Y	Y	T	T	Y	T	T	Y	Y	Y	Y	Y	T	Y	Y	T	T	Y	T	Y	T	T	Y	Y	T	Y	Y	Y	Y	T	T	T	T	T	T	Y	T	Y	H	T	T	T
S4338_17129	C/A	4338	17129	+	NA	C	C	C	C	M	C	C	M	H	C	C	C	M	M	C	M	C	C	C	M	C	C	M	C	C	M	M	C	M	N	C	C	C	C	C	C	M	C	C	M	C	C	C	C
S4342_8327	T/C	4342	8327	+	NA	T	T	T	Y	Y	Y	T	T	T	Y	Y	Y	T	T	Y	T	Y	T	T	T	Y	T	Y	T	Y	Y	T	Y	T	T	Y	Y	Y	T	Y	Y	T	T	T	Y	T	T	T	Y
S4346_3687	G/C	4346	3687	+	NA	S	S	G	G	S	G	G	G	S	S	S	S	G	G	G	S	G	G	G	S	S	G	S	G	S	S	S	S	S	S	S	S	S	G	S	S	G	S	G	S	G	G	G	S
S4355_13587	C/A	4355	13587	+	NA	C	M	C	C	C	C	C	C	M	M	C	M	C	M	M	C	M	M	M	C	C	C	C	M	C	M	C	C	C	C	C	C	M	C	C	C	M	M	C	C	C	M	C	C
S4373_5204	C/G	4373	5204	+	NA	S	S	S	S	S	S	S	C	S	S	S	S	C	C	C	C	S	C	S	C	C	S	C	C	C	S	S	S	C	C	S	S	C	C	C	C	S	S	C	N	C	C	S	S
S4375_4502	C/T	4375	4502	+	NA	C	C	C	Y	Y	Y	C	C	C	Y	Y	H	C	C	C	Y	C	C	C	C	Y	C	Y	C	Y	Y	C	Y	C	C	Y	N	C	N	H	H	C	C	C	Y	C	Y	C	Y
S4377_9057	A/G	4377	9057	+	NA	A	R	A	A	R	A	R	R	R	R	A	A	A	R	N	A	A	A	A	A	A	A	H	A	A	R	A	A	R	R	A	A	A	A	R	R	R	A	R	A	A	A	R	A
S4379_3692	A/G	4379	3692	+	NA	A	A	A	R	R	N	R	R	A	A	R	A	R	A	R	A	A	A	A	A	R	R	R	A	A	A	A	R	R	A	R	N	A	R	R	A	A	R	R	N	A	A	R	A
S4396_21497	C/T	4396	21497	+	NA	C	Y	C	C	C	N	Y	Y	Y	Y	Y	C	C	Y	C	Y	C	C	C	Y	C	C	C	Y	H	C	Y	C	C	C	Y	C	C	C	Y	Y	C	Y	C	N	N	C	Y	Y
S4412_14289	G/A	4412	14289	+	NA	R	R	R	R	G	G	R	G	G	R	G	H	G	R	R	R	G	G	G	G	G	R	G	G	G	G	G	R	G	R	H	N	R	G	G	G	G	G	G	G	H	G	G	R
S4414_10436	G/A	4414	10436	+	NA	R	R	R	R	G	R	R	G	G	R	G	R	G	R	R	R	R	G	G	G	G	R	G	G	G	R	G	R	G	R	R	R	R	G	G	G	G	G	G	R	R	G	G	R
S4418_7611	C/A	4418	7611	+	NA	C	C	M	C	C	M	C	M	C	C	C	M	M	C	M	C	C	C	C	M	C	C	M	C	C	M	M	C	M	C	M	M	C	C	M	C	C	M	M	C	C	C	C	M
S4419_9361	C/T	4419	9361	+	NA	Y	Y	Y	Y	C	C	Y	C	C	Y	Y	Y	Y	Y	Y	Y	Y	C	C	Y	C	Y	C	C	Y	Y	C	Y	Y	Y	Y	Y	C	C	C	C	C	Y	C	Y	Y	C	C	Y
S4423_1536	A/G	4423	1536	+	NA	R	A	R	A	R	A	A	R	R	R	A	R	R	R	A	A	A	A	A	A	R	R	R	A	A	A	A	A	R	R	A	R	R	R	A	A	A	R	A	N	R	A	R	R
S4424_15373	C/A	4424	15373	+	NA	M	C	M	C	M	C	C	M	M	M	C	C	M	M	C	C	C	C	C	C	M	M	M	C	M	C	C	C	C	C	C	M	C	M	C	C	C	M	M	C	C	C	M	C
S4425_6068	T/C	4425	6068	+	NA	T	Y	T	Y	T	T	Y	T	T	T	T	Y	Y	T	N	T	T	T	T	T	T	T	Y	T	Y	Y	T	T	Y	T	Y	N	Y	T	Y	T	T	T	T	T	H	T	T	T
S4431_7442	C/T	4431	7442	+	NA	C	Y	C	C	C	Y	Y	C	Y	Y	C	C	Y	Y	Y	C	Y	H	Y	C	C	C	Y	Y	C	Y	C	C	C	C	C	C	C	C	Y	Y	Y	Y	C	C	C	Y	Y	C
S4432_9524	G/C	4432	9524	+	NA	G	S	S	S	S	G	S	S	G	G	S	G	S	G	S	G	G	G	G	G	S	G	S	G	S	G	G	G	S	G	S	S	G	S	S	G	G	S	S	G	N	G	G	S
S4434_15290	A/G	4434	15290	+	NA	A	A	R	A	A	R	R	A	A	R	R	R	R	R	R	R	R	A	A	A	R	R	A	A	R	A	A	A	R	R	A	R	A	R	A	A	A	R	A	A	A	A	A	A
S4436_7675	T/C	4436	7675	+	NA	T	Y	T	T	Y	Y	Y	Y	T	T	Y	T	Y	T	Y	Y	Y	Y	Y	Y	Y	T	T	Y	Y	T	Y	Y	Y	T	T	Y	T	H	T	T	T	T	T	T	T	Y	Y	Y
S4437_5923	T/C	4437	5923	+	NA	T	T	Y	Y	T	H	Y	T	T	Y	Y	Y	Y	H	Y	Y	Y	T	T	Y	Y	Y	T	T	Y	T	T	T	Y	Y	T	T	T	Y	T	T	T	Y	T	N	T	T	T	T
S4440_1732	T/C	4440	1732	+	NA	T	T	T	T	Y	T	Y	Y	Y	Y	T	T	T	Y	T	T	T	T	T	Y	T	T	Y	T	T	Y	T	T	Y	Y	T	N	T	T	Y	Y	Y	T	Y	H	N	T	Y	T
S4442_6935	G/A	4442	6935	+	NA	R	R	R	R	G	G	R	G	G	R	R	R	R	R	R	R	R	G	G	R	G	R	G	G	R	R	G	R	R	R	R	R	G	G	G	G	G	R	G	R	R	G	G	G
S4449_2472	C/T	4449	2472	+	NA	C	Y	Y	Y	C	C	Y	C	C	Y	Y	Y	Y	Y	Y	Y	Y	C	C	Y	Y	Y	C	C	Y	Y	C	C	Y	Y	C	C	C	Y	C	C	C	Y	C	H	C	C	C	C
S4454_10938	G/A	4454	10938	+	NA	R	R	R	G	G	R	R	G	G	R	G	R	G	R	R	R	R	G	G	G	G	R	G	G	G	G	G	R	G	R	R	R	R	G	G	G	G	G	G	H	R	G	G	R
S4460_4268	C/G	4460	4268	+	NA	C	C	C	S	H	H	S	C	S	S	S	C	C	C	H	S	C	C	C	C	C	C	S	S	C	C	C	S	C	C	C	C	S	N	C	S	C	C	C	C	C	C	S	S
S4462_15785	C/G	4462	15785	+	NA	C	S	C	C	S	C	S	S	S	S	C	C	C	S	C	C	C	C	C	C	C	C	S	C	C	S	C	C	S	S	C	C	C	C	S	S	S	C	S	S	C	C	S	C
[truncated: 1,109 more rows]
[truncated: 49 more columns]
