# Supplementary material for: Ultra-High-Density Genetic Maps of Jatropha curcas × Jatropha integerrima and Anchoring Jatropha curcas Genome Assembly Scaffolds
Source: MDPI journal article supplement (doi:10.3390/f14091907), 2023-09-19
Supplement: s1 [file s1 › Supplementary Table S4_Map Positions of Markers and SNPs Per Scaffold Jat_r4.5_JatCur_1.0.xlsx]

## Sheet: Jat_r4.5 Map Marker Position 
Supplementary Table S4a: Linkage map positions of AFLP and microsatellite markers, and Jat_r.5 scaffolds, and the number of SNPs per scaffold
No.	Locus	Group	Position	No. of SNPs/Scaffold
1	E-AACXM-CAT04	1	0	0
2	S1326	1	5.783	1
3	W_Jcuint070	1	7.778	0
4	S10192	1	8.815	1
5	S3962	1	10.149	21
6	S3952	1	10.986	3
7	S5300	1	11.457	1
8	S4164	1	12.033	2
9	S6999	1	13.019	7
10	E-ACTXM-CTA04	1	13.669	0
11	S8626	1	14.412	1
12	S4034	1	14.665	3
13	S3608	1	15.217	1
14	S2130	1	15.851	1
15	S11929	1	16.027	1
16	S1913	1	16.637	4
17	S4982	1	17.17	1
18	S4307	1	17.325	3
19	S3711	1	17.959	2
20	S1802	1	18.465	1
21	S3822	1	18.825	5
22	S201	1	19.212	1
23	S1921	1	19.742	4
24	S1099	1	20.144	4
25	S3575	1	20.635	7
26	S5678	1	21.266	1
27	S2099	1	21.72	6
28	S6778	1	22.182	3
29	S2262	1	22.405	4
30	S1989	1	22.851	3
31	S355	1	23.135	6
32	S4767	1	23.538	2
33	S653	1	24.533	4
34	S3539	1	24.845	9
35	E-ACTXM-CTG08	1	25.249	0
36	S2400	1	25.784	1
37	S15604	1	26.054	3
38	S4864	1	26.624	5
39	S3463	1	26.831	2
40	S9079	1	27.156	2
41	S9645	1	27.382	1
42	S1901	1	27.803	5
43	S5116	1	28.222	2
44	S7574	1	28.39	2
45	S28289	1	28.517	2
46	S8512	1	28.793	3
47	S4373	1	29.123	6
48	S2601	1	29.256	2
49	S5539	1	29.295	1
50	S7272	1	29.295	2
51	S2000	1	29.301	2
52	S626	1	29.92	8
53	S2223	1	30.142	2
54	S1369	1	30.271	1
55	S5110	1	30.583	2
56	S6317	1	30.866	7
57	S17662	1	31.046	3
58	S3568	1	31.417	8
59	S16227	1	31.643	2
60	S9076	1	31.893	3
61	S6953	1	32.082	3
62	S9474	1	32.282	6
63	S3205	1	32.618	11
64	S2503	1	32.737	2
65	S15811	1	33.057	2
66	S6968	1	33.376	3
67	S10783	1	33.692	6
68	W_Jcuint220	1	33.845	0
69	S46	1	34.038	5
70	S2381	1	34.186	8
71	S1960	1	34.281	2
72	S3740	1	34.35	4
73	S1428	1	34.551	5
74	S3937	1	34.647	3
75	S2871	1	34.752	2
76	S17314	1	34.923	2
77	S16912	1	35.041	3
78	S1492	1	35.117	1
79	S9901	1	35.322	1
80	S2122	1	35.349	9
81	S27081	1	35.349	5
82	S3251	1	35.349	5
83	S3846	1	35.349	3
84	S6592	1	35.349	11
85	S2836	1	35.504	3
86	S1268	1	35.529	4
87	S1964	1	35.83	4
88	S12916	1	35.954	4
89	S11075	1	36.281	6
90	S7544	1	36.579	2
91	S1008	1	36.758	4
92	S4275	1	36.907	2
93	S3841	1	36.979	2
94	S7450	1	37.166	1
95	S4985	1	37.568	9
96	S2547	1	37.782	2
97	S11223	1	38.199	7
98	S6385	1	38.504	2
99	S2202	1	38.769	1
100	S5050	1	39.011	1
101	S7663	1	39.176	4
102	S3921	1	39.197	1
103	S4971	1	39.197	4
104	S7480	1	39.197	3
105	S5717	1	39.255	2
106	S1553	1	39.656	5
107	S4496	1	39.698	3
108	S2410	1	39.961	4
109	S4288	1	40.255	1
110	S1604	1	40.512	1
111	S1060	1	40.77	17
112	S5779	1	41.155	1
113	S3018	1	41.408	7
114	S7502	1	41.598	3
115	S2499	1	41.721	6
116	S6640	1	42.137	2
117	E-ACTXM-CTA03a	1	42.6	0
118	E-ACTXM-CAT02	1	42.844	0
119	S3361	1	43.18	12
120	S8129	1	43.335	2
121	S15134	1	43.349	1
122	S990	1	43.349	6
123	S7805	1	43.902	4
124	S1794	1	44.158	4
125	S3707	1	44.394	4
126	S780	1	44.773	1
127	S4523	1	45.025	8
128	S4114	1	45.44	1
129	S1217	1	45.715	2
130	S4636	1	45.715	2
131	S619	1	45.803	6
132	S5418	1	45.819	2
133	S21287	1	45.99	5
134	S1991	1	46.078	15
135	S516	1	46.164	6
136	S1622	1	46.479	14
137	S18314	1	46.658	2
138	S547	1	46.658	6
139	S6415	1	46.92	4
140	S4041	1	47.025	3
141	S3148	1	47.361	5
142	S1944	1	47.572	12
143	S344	1	47.816	6
144	S1081	1	48.022	4
145	S3573	1	48.022	7
146	S1741	1	48.082	7
147	S352	1	48.082	18
148	S2326	1	48.269	10
149	S16636	1	48.44	4
150	S40	1	48.57	26
151	S45	1	48.671	12
152	S1740	1	48.789	2
153	S1644	1	48.974	6
154	S102	1	49.256	9
155	S1189	1	49.385	13
156	S4974	1	49.385	6
157	W_Jcuint349	1	49.555	0
158	S2887	1	49.777	6
159	S736	1	49.924	2
160	S15738	1	50.094	5
161	S12802	1	50.146	1
162	S328	1	50.411	14
163	S583	1	50.483	9
164	S5872	1	50.67	2
165	S615	1	50.829	5
166	S2789	1	50.988	4
167	S594	1	51.139	10
168	S699	1	51.251	14
169	S2924	1	51.374	8
170	S388	1	51.754	25
171	S1452	1	51.916	3
172	S7817	1	52.273	3
173	S935	1	52.62	3
174	S2030	1	52.865	6
175	S1617	1	53.745	6
176	S476	1	54.436	4
177	S410	1	54.995	12
178	S17116	1	55.393	1
179	S10158	1	55.861	3
180	S7791	1	56.207	2
181	S4746	1	56.966	3
182	S4670	1	57.323	1
183	S8266	1	58.444	5
184	S651	1	58.71	2
185	S340	1	59.097	17
186	S2869	1	59.191	13
187	S256	1	59.399	23
188	S3140	1	59.555	2
189	S3311	1	59.922	1
190	S14369	1	60.422	1
191	S1018	1	60.628	2
192	S1398	1	61.216	3
193	S2853	1	61.383	2
194	S4540	1	61.782	10
195	S1959	1	62.208	2
196	S1716	1	62.584	1
197	S17253	1	62.584	5
198	S279	1	62.584	5
199	S909	1	62.861	2
200	S14117	1	63.311	1
201	S42	1	63.615	20
202	S3610	1	64.079	2
203	S3511	1	64.797	7
204	S2256	1	65.196	1
205	S545	1	65.63	3
206	S294	1	65.961	13
207	S724	1	66.988	10
208	S7494	1	67.161	4
209	S2359	1	67.661	12
210	S288	1	67.96	2
211	S3764	1	68.55	7
212	S672	1	68.674	9
213	S230	1	70.235	9
214	S33	1	70.642	16
215	S610	1	70.642	4
216	S1816	1	71.2	3
217	S1724	1	72.334	10
218	S2874	1	72.531	2
219	S563	1	72.531	3
220	S7	1	72.531	17
221	S7386	1	72.531	3
222	S2777	1	72.61	1
223	S226	1	72.753	11
224	S374	1	72.99	4
225	S11667	1	73.166	1
226	S1156	1	73.463	8
227	S2245	1	74.069	9
228	S106	1	74.362	15
229	S11063	1	75.464	4
230	S15398	1	75.464	2
231	S2947	1	75.464	7
232	S616	1	75.464	6
233	S1067	1	75.465	10
234	S2864	1	75.465	2
235	S2910	1	75.465	4
236	S1666	1	75.881	15
237	S1503	1	75.932	6
238	S11446	1	76.457	2
239	S3730	1	76.661	1
240	S2568	1	77.243	3
241	S112	1	78.476	16
242	S982	1	78.948	6
243	S572	1	79.857	4
244	S715	1	80.752	2
245	S5252	1	82.7	14
246	S10330	1	82.739	2
247	E-AACXM-CAT06	1	84.38	0
248	E-AACXM-CAG04	2	0	0
249	S2727	2	0	1
250	S6232	2	5.582	3
251	S4027	2	7.246	8
252	E-AAGXM-CAT14	2	10.414	0
253	S11746	2	11.872	4
254	S8418	2	13.479	1
255	S1420	2	14.265	6
256	S987	2	15.433	6
257	S4046	2	17.604	2
258	S481	2	18.763	9
259	S5510	2	18.763	14
260	S12878	2	19.191	2
261	S363	2	20.396	2
262	S210	2	22.026	6
263	S1527	2	22.855	10
264	S1897	2	23.252	5
265	S975	2	24.406	12
266	S12123	2	25.08	6
267	S3883	2	26.007	1
268	S2077	2	27.633	8
269	S9892	2	30.746	2
270	S3252	2	31.364	5
271	S3942	2	32.573	3
272	S1009	2	33.225	1
273	S3346	2	34.521	7
274	S396	2	34.758	8
275	S3933	2	34.919	5
276	S10236	2	35.843	8
277	S10853	2	36.615	3
279	S10074	2	37.182	1
278	S8613	2	37.182	3
280	S2392	2	38.649	4
281	S3237	2	39.031	3
282	S4534	2	39.433	6
283	S3053	2	39.68	4
284	S815	2	41.949	1
285	S2839	2	43.75	2
286	S3324	2	44.129	6
287	S5716	2	44.158	4
288	S3838	2	44.407	4
289	S1819	2	44.478	4
290	S1781	2	44.741	2
291	S2580	2	44.779	8
292	S3535	2	45.23	3
293	S3681	2	45.433	2
294	S3968	2	45.591	10
295	S1314	2	45.6	4
296	S147	2	46.125	22
297	S4536	2	46.366	8
298	S6717	2	46.391	5
299	S14270	2	46.451	3
300	S11921	2	46.774	3
301	S1417	2	46.774	1
302	S646	2	46.775	14
303	S6586	2	46.787	8
309	S14128	2	47.07	2
310	S1419	2	47.07	1
311	S3395	2	47.07	2
313	S4136	2	47.07	3
304	S4507	2	47.07	1
308	S4892	2	47.07	1
312	S492	2	47.07	3
306	S4973	2	47.07	6
305	S6841	2	47.07	4
307	S7738	2	47.07	5
314	S8440	2	47.084	2
315	S1393	2	47.094	2
316	S8387	2	47.147	4
317	S386	2	47.148	4
318	S2816	2	47.177	2
320	S4311	2	47.217	2
319	S8427	2	47.217	1
321	S4419	2	47.647	3
322	S1447	2	48.151	5
323	S19790	2	48.246	1
324	S4442	2	48.246	8
325	S5015	2	48.246	1
326	S962	2	48.328	3
327	S1514	2	48.931	4
328	S4938	2	49.084	5
329	S2008	2	49.132	1
330	S16231	2	49.237	1
331	S5811	2	49.389	3
332	S5272	2	49.637	5
333	S7201	2	49.858	3
334	S1735	2	50.041	6
335	S1279	2	51.229	17
336	S3591	2	51.651	7
337	S2420	2	51.832	2
338	S261	2	52.328	1
339	S14977	2	52.998	3
340	S4332	2	54.725	4
341	S1628	2	55.578	2
342	S15149	2	56.536	2
343	S2850	2	56.988	4
344	S349	2	58.474	7
345	S2501	2	59.333	3
346	S2473	2	60.673	2
347	S2134	2	64.278	4
348	S13255	2	64.968	3
349	S6672	2	66.667	3
350	S2830	2	74.295	1
351	S3616	2	82.148	3
352	S2642	2	85.308	3
353	S5188	2	87.606	2
354	S2216	2	88.132	2
355	S804	2	90.889	8
356	S20580	2	92.35	1
357	S61	2	96.947	13
358	S1646	2	97.478	2
359	S3876	2	99.554	2
360	S628	2	101.223	15
361	S2753	3	-2.695	1
362	S6363	3	-1.751	1
363	S7215	3	-0.656	1
364	S5821	3	0	3
365	E-AAGXM-CAT03	3	0.853	0
366	S4577	3	1.296	4
367	S3351	3	1.742	4
368	S14095	3	2.239	3
369	S3890	3	2.895	1
370	S3950	3	3.417	5
371	S1645	3	4.093	1
372	S1411	3	4.415	3
373	S4030	3	4.843	7
374	S5759	3	5.151	4
375	S6837	3	5.613	4
376	S7471	3	6.027	1
377	S5921	3	6.488	7
378	S5873	3	7.054	3
379	S2507	3	7.503	3
380	S3945	3	7.641	3
381	S1552	3	8.196	3
382	S15755	3	8.518	6
383	S1161	3	9.058	2
384	S2085	3	9.603	3
385	S2573	3	9.747	6
386	S2011	3	10.206	11
387	S10696	3	10.429	1
388	S983	3	10.787	5
389	S3380	3	11.087	5
390	S11322	3	11.442	1
391	S5568	3	11.74	2
392	S2188	3	12.218	3
393	S2740	3	12.443	6
394	S806	3	12.458	4
395	S6670	3	12.549	2
396	S5402	3	12.713	2
397	S2040	3	12.725	4
398	S17242	3	12.872	8
399	S1021	3	12.902	4
400	S14368	3	13.019	2
401	S1065	3	13.212	6
402	S15206	3	13.313	2
403	S1620	3	13.544	4
404	S3956	3	13.869	9
405	S1948	3	14.143	4
406	S5047	3	14.632	3
407	S162	3	14.92	5
408	S4885	3	15.137	4
409	S7673	3	15.438	8
410	S1563	3	15.679	2
411	S15102	3	15.98	5
412	S17810	3	16.268	5
413	S3589	3	16.654	4
414	S4828	3	16.862	5
415	S4425	3	16.984	4
416	S7391	3	17.394	3
417	S1558	3	17.625	2
418	S4492	3	17.955	4
419	S26196	3	18.3	6
420	S2718	3	18.806	4
421	S2302	3	19.504	15
422	S1497	3	19.664	4
423	S3405	3	20.152	5
424	S6566	3	20.609	2
425	S175	3	21.131	4
426	S552	3	21.464	5
427	S90	3	22.001	10
428	S2843	3	22.502	4
429	S618	3	22.785	2
430	S863	3	23.034	13
431	S733	3	23.292	8
432	S198	3	24.254	6
433	S1203	3	25.069	6
434	S6476	3	25.609	3
435	S95	3	26.043	4
436	S26585	3	26.921	6
437	S586	3	27.437	4
438	S2364	3	28.18	2
439	S25290	3	29.05	1
440	S307	3	29.962	7
441	S216	3	33.648	18
442	S4946	3	35.358	1
443	S9210	3	36.497	4
444	S2520	3	38.585	4
445	S5552	3	39.495	5
446	S940	3	40.109	2
447	S5450	3	41.106	10
448	S8524	3	42.758	1
449	S8414	3	43.883	3
450	S1392	3	44.494	6
451	S2214	3	44.917	11
452	S920	3	45.652	10
453	S5084	3	45.997	2
454	S1659	3	46.95	2
455	S64	3	47.68	18
456	S737	3	48.588	3
457	E-AACXM-CTA12	3	49.087	0
458	S225	3	50.775	3
459	S197	3	52.319	16
460	S250	3	53.732	1
461	S18804	3	54.801	3
462	S1295	3	55.216	3
463	S2351	3	56.564	1
464	S7389	3	57.102	3
465	S1400	3	57.986	3
466	S6379	3	58.338	2
467	S504	3	58.524	16
468	S7296	3	59.04	4
469	S467	3	59.485	13
470	S474	3	59.764	5
471	S706	3	60.751	11
472	S1195	3	61.037	8
473	S3325	3	61.794	10
474	S2691	3	62.293	2
475	S291	3	62.834	16
476	S2942	3	63.276	2
477	S105	3	63.365	27
478	S1112	3	64.222	3
479	S4463	3	65.265	10
480	S10365	3	66.161	1
481	S4907	3	67.6	2
482	S63	3	67.941	24
483	S5144	3	68.49	4
484	S21278	3	69.641	2
485	S5976	3	70.718	5
486	S295	3	71.66	12
487	S2042	3	72.182	5
488	S892	3	73.572	1
489	S7297	3	77.307	3
490	S7298	3	79.459	5
491	E-AACXM-CAG01	3	84.653	0
492	S2418	4	0	4
493	S1779	4	3.693	3
494	S22614	4	12.038	2
495	S2	4	13.748	37
496	S387	4	15.035	3
497	S1416	4	17.238	16
498	S712	4	19.934	12
499	S6	4	20.98	16
500	S784	4	22.737	3
501	S182	4	24.898	19
502	S5936	4	27.219	3
503	S13938	4	28.382	2
504	S1710	4	29.538	2
505	S8433	4	31.245	1
506	S4925	4	32.086	2
507	S30	4	33.467	13
508	S9122	4	34.53	5
509	S146	4	35.696	19
510	S13638	4	36.52	8
511	S1236	4	37.512	2
512	S674	4	38.02	6
513	S1288	4	38.871	10
514	S4262	4	40.332	5
515	S2861	4	41.173	6
516	S1061	4	41.58	8
517	S67	4	42.394	25
518	S9910	4	43.167	3
519	SJCR4U29009	4	44.606	1
520	S359	4	45.367	6
521	S459	4	47.148	6
522	S6073	4	47.637	2
523	S1846	4	49.277	3
524	S223	4	50.852	14
525	S11776	4	51.689	3
526	S2291	4	53.058	1
527	S1237	4	53.848	2
528	S283	4	54.642	3
529	S3220	4	55.275	2
530	S5052	4	56.194	4
531	S103	4	56.744	13
532	S4999	4	58.261	4
533	S2089	4	58.911	3
534	S6094	4	60.495	5
535	S6671	4	62.597	2
536	S852	4	63.706	6
537	S4009	4	64.695	9
538	S3002	4	65.454	2
539	S8384	4	65.99	1
540	S512	4	66.333	6
541	S3624	4	66.579	2
542	S6487	4	67.123	1
543	S2388	4	67.544	2
544	S2682	4	67.964	2
545	S2737	4	68.316	6
546	S3603	4	68.773	1
547	S5807	4	69.386	2
548	S1250	4	70.08	3
549	S2366	4	70.749	6
550	S4953	4	71.131	4
551	S7303	4	71.177	2
552	S3221	4	71.431	8
553	S939	4	72.051	3
554	S7370	4	72.343	4
555	S104	4	72.471	2
556	S1225	4	72.849	2
557	S12374	4	73.353	1
558	S8682	4	73.593	1
559	S12891	4	73.789	2
560	S2859	4	74.01	2
561	S3851	4	74.231	1
562	S4541	4	74.713	2
563	S1806	4	75.46	5
564	S9516	4	75.956	1
565	S11957	4	76.433	1
566	S8867	4	76.846	2
567	S1147	4	77.18	1
568	S1399	4	77.788	3
569	S1608	4	78.554	4
570	S2617	4	80.068	3
571	S2006	4	80.674	4
572	S4287	4	81.124	4
573	S13399	4	81.657	2
574	S1270	4	81.85	6
575	S6821	4	81.984	2
576	S310	4	82.251	1
577	S3470	4	82.714	5
578	S2654	4	83.072	9
579	S956	4	83.853	1
580	S2890	4	84.187	13
581	S968	4	84.721	2
582	S9384	4	85.628	3
583	S3590	4	86.324	5
584	S22171	4	87.027	4
585	S5721	4	87.605	3
586	S4285	4	88.214	4
587	S891	4	88.926	8
588	S4396	4	89.567	2
589	S4290	4	89.69	6
590	S4229	4	90.371	1
591	S1939	4	91.131	8
592	S1722	4	91.725	3
593	S5234	4	92.442	2
594	E-ACAXM-CAT04	4	93.142	0
595	S3202	4	93.972	11
596	S251	4	94.591	6
597	S830	4	94.978	6
598	S2607	4	95.743	1
599	S3530	4	96.325	4
600	S8550	4	96.819	2
601	S2829	4	97.197	3
602	S7363	4	97.705	1
603	S4089	4	98.707	6
604	S125	4	99.199	6
605	S778	4	99.764	4
606	S3958	4	100.114	10
607	S345	4	100.392	12
608	S3223	4	101.385	7
609	S7358	4	101.679	4
610	S7644	4	102.809	2
611	S685	4	103.605	2
612	S2320	4	104.449	2
613	S2732	4	105.214	1
614	S843	4	105.847	7
615	S15774	4	106.326	2
616	S26121	4	107.867	2
617	E-ACTXM-CAT06	4	108.81	0
618	S2361	4	111.27	2
619	SJCR4U31392	4	112.788	3
620	S6387	4	114.018	2
621	E-ACAXM-CTG01	4	118.236	0
622	S9366	4	121.996	3
623	S1663	5	0	2
624	E-AAGXM-CAT10	5	4.507	0
625	S7775	5	10.695	1
626	S3456	5	12.147	3
627	S14026	5	13.758	2
628	S5682	5	14.839	3
629	S4941	5	15.526	3
630	S1410	5	16.65	1
631	S24719	5	17.033	2
632	S7190	5	17.55	1
633	S17924	5	18.014	5
634	S3432	5	18.43	3
635	S8704	5	18.946	1
636	S15731	5	19.466	2
637	S10854	5	19.859	1
638	E-ACTXM-CTG01	5	20.165	0
639	S4531	5	20.619	1
640	S1988	5	21.045	2
641	S289	5	21.538	3
642	S1586	5	21.9	3
643	S4020	5	22.367	1
644	S6579	5	22.598	2
645	S6518	5	22.907	2
646	S14330	5	23.269	3
647	S5297	5	23.559	4
648	S5063	5	24.003	3
649	S11964	5	24.188	3
650	S6457	5	24.677	1
651	S19768	5	25.025	3
652	S19344	5	25.18	2
653	S2605	5	25.581	9
654	S6065	5	25.812	3
655	S3961	5	25.895	3
656	S2540	5	26.307	4
657	S6391	5	26.708	3
658	S5210	5	26.966	7
659	S6418	5	27.298	7
660	S444	5	27.781	1
661	S1498	5	27.962	6
662	S1344	5	28.368	2
663	S14024	5	28.622	2
664	S2170	5	28.866	4
665	S7478	5	28.975	1
666	S1145	5	29.24	2
667	S1273	5	29.292	6
668	S4815	5	29.421	4
669	S440	5	29.522	8
670	S5361	5	29.675	2
671	S5573	5	29.81	2
672	S6852	5	30.018	4
673	S207	5	30.249	3
674	S8063	5	30.397	2
675	S7312	5	30.508	4
676	S17097	5	30.632	1
677	S5550	5	30.766	2
678	S8535	5	31.107	1
679	S5075	5	31.567	3
680	S72	5	31.908	13
681	S4003	5	32.413	3
682	S9231	5	32.907	3
683	S3359	5	33.186	7
684	S1171	5	33.568	6
685	S7643	5	33.703	2
686	S2586	5	33.913	4
687	S4146	5	34.278	6
688	S4423	5	34.597	4
689	S3978	5	34.974	2
690	S1876	5	35.12	4
691	S1063	5	35.317	4
692	S6651	5	35.448	4
693	S18761	5	35.941	5
694	S14672	5	36.559	1
695	S9468	5	36.909	5
696	S1363	5	37.643	6
697	S2350	5	37.955	1
698	S1136	5	38.406	8
699	S2374	5	38.951	2
700	S11262	5	39.176	4
701	S187	5	39.562	25
702	S6028	5	39.695	4
703	S4817	5	40.041	1
704	S1568	5	40.74	3
705	S161	5	41.304	18
706	S44	5	41.581	11
707	S1839	5	41.959	2
708	S3619	5	42.286	1
709	S675	5	42.839	5
710	S1954	5	43.267	11
711	S2463	5	43.786	4
712	S2235	5	44.354	1
713	W_Jatr739	5	44.612	0
714	TERI_JcSSR2626	5	45.101	0
715	S5374	5	45.381	1
716	S249	5	46.213	7
717	S313	5	46.856	11
718	S5019	5	47.899	3
719	S94	5	48.781	14
720	S579	5	50.054	1
721	S35	5	52.277	21
722	S213	5	52.871	13
723	S1679	5	53.619	2
724	W_Jcuint002	5	53.978	0
725	S3161	5	54.92	8
726	S787	5	55.857	1
727	S114	5	57.967	14
728	S2527	5	58.715	7
729	S3454	5	59.229	8
730	S3546	5	60.445	6
731	S4484	5	61.35	5
732	S700	5	62.624	11
733	S9	5	63.505	27
734	S3149	5	64.099	9
735	S1594	5	64.975	3
736	S2370	5	65.676	6
737	S911	5	66.303	2
738	S1104	5	66.712	23
739	S100	5	67.233	10
740	S1429	5	67.662	7
741	S11093	5	67.717	8
742	S111	5	68.333	10
743	S15091	5	69.204	5
744	S190	5	69.863	4
745	S593	5	71.093	1
746	S269	5	72.924	11
747	S441	5	73.787	21
748	S3665	5	75.057	8
749	S5952	5	76.788	1
750	S6018	5	78.219	1
751	S7213	5	80.168	1
752	S4	5	81.386	33
753	S872	5	84.304	1
754	E-ACTXM-CAT07	5	87.714	0
755	S28	5	89.563	30
756	S160	5	90.561	5
757	S346	5	91.519	18
758	S5111	5	92.744	4
759	S2234	5	94.795	6
760	S770	5	95.174	16
761	S1	5	96.562	30
762	S3	5	98.456	24
763	S670	5	99.315	12
764	S2802	5	101.041	4
765	S5493	5	102.916	8
766	S39	5	104.193	12
767	S592	5	105.297	4
768	S19478	5	105.954	2
769	S434	5	106.986	4
770	S1890	5	109.117	2
771	S9155	5	111.258	1
772	S10676	5	113.847	1
773	E-ACTXM-CTA13	5	115.43	0
774	E-AAXM-CTG03	6	0	0
775	S300	6	6.843	7
776	S2393	6	7.622	2
777	S2041	6	10.734	3
778	S1932	6	12.693	2
779	S3169	6	13.785	2
780	S882	6	14.755	9
781	S1176	6	15.725	3
782	E-AACXM-CAG05	6	17.988	0
783	S6488	6	19.128	3
784	S3362	6	20.415	1
785	S334	6	21.007	2
786	S6897	6	22.136	2
787	S8449	6	23.156	2
788	S228	6	24.033	22
789	S6964	6	24.314	4
790	S12917	6	25.211	1
791	E-ACTXM-CTA05	6	26.3	0
792	S6066	6	26.824	3
793	S7813	6	27.556	5
794	S2154	6	28.501	4
795	S1068	6	29.12	2
796	S368	6	29.834	6
797	S303	6	30.065	13
798	S8598	6	31.12	1
799	S4546	6	31.894	2
800	S16855	6	32.78	2
801	S3748	6	33.088	8
802	S3552	6	33.533	8
803	S7963	6	34.129	2
804	S8655	6	35.096	1
805	S2265	6	35.358	3
806	S2273	6	36.131	4
807	E-ACTXM-CTA10	6	36.976	0
808	S4533	6	37.443	4
809	S4330	6	38.191	1
810	S2631	6	38.81	2
811	S853	6	38.984	13
812	S6325	6	39.25	2
813	S4701	6	39.455	2
814	S2686	6	39.903	3
815	S2183	6	40.572	6
816	S4939	6	40.868	6
817	S2919	6	41.8	2
818	S6951	6	42.166	2
819	S1332	6	42.546	4
820	S742	6	42.868	4
821	S5051	6	43.172	2
822	S14191	6	43.663	4
823	S690	6	43.926	3
824	SJCR4U39085	6	44.449	1
825	S2676	6	44.669	1
826	S3701	6	45.019	4
827	S19705	6	45.115	2
828	S2460	6	45.305	6
829	S17796	6	45.568	2
830	S416	6	46.068	4
831	S7347	6	47.901	1
832	S2742	6	48.466	4
833	S1908	6	48.761	2
834	S152	6	49.075	8
835	S19826	6	49.606	1
836	S1280	6	50.197	9
837	S10886	6	50.646	9
838	S2821	6	51.286	4
839	S262	6	52.323	11
840	S683	6	52.772	3
841	S8363	6	52.969	1
842	S1774	6	53.577	9
843	S4186	6	54.103	4
844	S16496	6	54.428	3
845	S11114	6	54.874	4
846	S1692	6	55.152	4
847	S7402	6	55.339	2
848	S101	6	55.459	16
849	S2135	6	56.131	12
850	S3534	6	56.48	9
851	S3468	6	56.843	1
852	S3517	6	57.51	1
853	S1559	6	57.982	9
854	S5590	6	58.51	4
855	S2619	6	59.049	2
856	S22238	6	59.338	2
857	S12906	6	59.96	1
858	S3659	6	60.484	3
859	S1766	6	60.888	4
860	S3949	6	61.401	1
861	S5353	6	61.818	4
862	E-ACTXM-CTG09	6	62.421	0
863	E-AAXM-CTG04	6	63.238	0
864	S668	6	63.743	1
865	S2146	6	64.469	2
866	S5738	6	65.239	3
867	S9705	6	66.04	1
868	S82	6	67.122	2
869	S31	6	67.623	5
870	S8021	6	67.806	2
871	S17612	6	68.297	1
872	S3419	6	69.051	1
873	S9010	6	69.376	1
874	S932	6	70.162	3
875	S2824	6	71.057	5
876	S14161	6	71.391	1
877	S1529	6	71.886	4
878	S4564	6	72.464	3
879	S1759	6	73.168	1
880	S1086	6	73.822	5
881	S551	6	74.106	4
882	S135	6	74.688	24
883	S10370	6	75.714	4
884	S8480	6	76.449	2
885	S99	6	77.09	18
886	S3278	6	77.666	5
887	S3784	6	78.389	8
888	S5584	6	78.706	4
889	S818	6	79.215	8
890	S17290	6	80.102	3
891	S16938	6	80.848	2
892	S5664	6	81.593	3
893	S2025	6	83.263	11
894	S265	6	84.377	15
895	S326	6	84.854	11
896	S7968	6	85.339	4
897	S4375	6	85.97	8
898	S4736	6	86.581	5
899	S1808	6	87.577	22
900	S27054	6	87.864	2
901	S4717	6	88.397	6
902	S27	6	88.88	18
903	S3713	6	89.752	11
904	S5122	6	90.488	3
905	S2046	6	91.225	1
906	S1732	6	91.895	12
907	S1157	6	92.993	3
908	S192	6	94.852	1
909	S3895	6	96.524	7
910	S2841	6	99.677	1
911	S1869	7	0	3
912	S16786	7	1.999	3
913	S4081	7	3.197	3
914	S558	7	5.734	8
915	S10620	7	6.32	3
916	S3070	7	7.127	3
917	S1232	7	7.365	8
918	S2966	7	8.057	3
919	E-ACTXM-CTA11	7	8.996	0
920	TERI_JcSSR2742	7	9.54	0
921	S3995	7	10.748	2
922	S2725	7	11.208	1
923	S1108	7	11.487	7
924	S6744	7	11.909	2
925	S1204	7	12.821	1
926	S795	7	12.998	10
927	S11338	7	13.415	3
928	S12997	7	13.779	3
929	E-ACTXM-CAT05	7	13.964	0
930	S9914	7	14.413	1
931	S7819	7	14.614	1
932	S8879	7	15.175	2
933	S118	7	15.405	13
934	S132	7	15.465	18
935	S664	7	15.721	4
936	S11	7	16.084	17
937	S7641	7	16.477	1
938	S1001	7	16.813	7
939	S3796	7	17.091	3
940	S2751	7	17.684	1
941	S910	7	17.853	11
942	S1983	7	18.238	4
943	S1316	7	18.656	7
944	S7743	7	18.854	7
945	S2814	7	19.074	2
946	S5154	7	19.258	5
947	S750	7	19.565	7
948	S2880	7	19.753	10
949	S6192	7	20.154	7
950	S8	7	20.308	31
951	S2319	7	20.494	3
952	S8824	7	20.744	1
953	S21749	7	20.938	2
954	S1835	7	21.471	1
955	S2003	7	21.82	9
956	S529	7	22.02	11
957	S21380	7	22.269	1
958	S13743	7	22.664	4
959	S14452	7	22.932	4
960	S10464	7	23.125	3
961	S7468	7	23.467	5
962	S1334	7	23.81	6
963	S1038	7	24.159	3
964	S2078	7	24.56	1
965	S2773	7	24.747	1
966	S13976	7	25.071	5
967	S587	7	25.25	10
968	S3231	7	25.569	5
969	S5941	7	26.021	3
970	S1911	7	26.346	7
971	S4936	7	26.398	10
972	S9659	7	26.855	4
973	S8073	7	27.271	1
974	S1936	7	27.529	11
975	S3164	7	27.674	11
976	S8267	7	27.919	2
977	S3460	7	28.156	8
978	S1489	7	28.571	4
979	S472	7	28.679	8
980	S47	7	28.884	15
981	S429	7	29.007	22
982	S4923	7	29.657	10
983	S3352	7	29.915	1
984	S2827	7	30.179	4
985	S2271	7	30.468	12
986	W_Jatr845	7	30.81	0
987	S15203	7	31.073	4
988	S80	7	31.348	14
989	E-ACAXM-CAT05	7	31.682	0
990	S2563	7	31.968	7
991	S11956	7	32.096	1
992	S1462	7	32.452	9
993	S539	7	32.594	15
994	S2886	7	32.664	3
995	S1631	7	33.051	2
996	S15720	7	33.15	1
997	S5928	7	33.357	4
998	S8202	7	33.625	3
999	S2608	7	33.964	3
1000	S4689	7	34.335	4
1001	S3466	7	34.413	1
1002	S2759	7	34.735	2
1003	S4871	7	34.796	2
1004	S3332	7	34.951	4
1005	S2925	7	35.107	6
1006	S905	7	35.209	4
1007	S1990	7	35.574	10
1008	S1481	7	35.815	10
1009	S12522	7	35.896	1
1010	S5496	7	36.143	4
1011	S25825	7	36.254	3
1012	S8038	7	36.515	1
1013	S2382	7	36.646	4
1014	S566	7	36.912	14
1015	S8974	7	37.044	2
1016	S217	7	37.124	12
1017	S8407	7	37.287	2
1018	S227	7	37.407	17
1019	TERI_JcSSR2749	7	37.674	0
1020	S2371	7	37.84	2
1021	S934	7	37.992	22
1022	S3152	7	38.074	2
1023	S6047	7	38.234	4
1024	S1172	7	38.343	13
1025	S3595	7	38.576	12
1026	S2616	7	38.763	6
1027	S12029	7	38.885	1
1028	S1929	7	39.066	14
1029	S179	7	39.346	12
1030	S4663	7	39.628	1
1031	S3173	7	39.807	3
1032	S6538	7	39.955	4
1033	S3254	7	40.18	1
1034	S8648	7	40.384	2
1035	S2061	7	40.46	1
1036	S10209	7	40.793	2
1037	S5070	7	40.836	6
1038	S2412	7	41.089	8
1039	S2703	7	41.194	2
1040	S3196	7	41.345	4
1041	S252	7	41.459	17
1042	S6720	7	41.604	5
1043	S4520	7	41.855	7
1044	S10860	7	42.148	2
1045	S5405	7	42.395	3
1046	S2609	7	42.632	5
1047	S508	7	42.759	6
1048	S8997	7	42.992	5
1049	S5082	7	43.091	4
1050	S4079	7	43.487	7
1051	S2534	7	43.687	3
1052	S6076	7	43.972	15
1053	S1603	7	44.543	6
1054	S6914	7	44.735	4
1055	S2589	7	44.873	4
1056	S1798	7	45.3	4
1057	S3963	7	45.372	2
1058	S5146	7	45.764	2
1059	S11769	7	45.984	5
1060	S6604	7	46.246	3
1061	S848	7	46.434	2
1062	S4852	7	46.745	2
1063	S3358	7	46.947	1
1064	S4929	7	47.333	4
1065	S4747	7	47.43	2
1066	S870	7	47.686	4
1067	S2153	7	47.849	2
1068	S3737	7	48.05	2
1069	S5800	7	48.267	2
1070	S1406	7	48.66	2
1071	S889	7	48.912	1
1072	S7896	7	49.314	8
1073	S452	7	49.533	3
1074	S3984	7	49.811	2
1075	S8473	7	50.075	5
1076	S6658	7	50.243	2
1077	S448	7	50.617	2
1078	S364	7	50.69	4
1079	S2079	7	50.929	10
1080	S415	7	51.039	6
1081	S5073	7	51.144	2
1082	S1615	7	51.247	9
1083	S7899	7	51.642	8
1084	S1070	7	51.833	11
1085	S3938	7	52.044	4
1086	S4808	7	52.197	3
1087	S2161	7	52.325	5
1088	S573	7	52.601	2
1089	S20437	7	52.655	1
1090	S1918	7	52.937	4
1091	S2013	7	53.094	2
1092	S1168	7	53.246	9
1093	S58	7	53.606	9
1094	S791	7	53.878	2
1095	S5429	7	54.086	4
1096	S2287	7	54.227	6
1097	S9282	7	54.607	2
1098	S13936	7	54.795	2
1099	S1290	7	55.125	2
1100	S976	7	55.413	5
1101	S2191	7	55.719	3
1102	S70	7	56.133	12
1103	S9732	7	56.363	2
1104	S771	7	56.825	2
1105	S3986	7	57.293	2
1106	S585	7	57.574	8
1107	S7295	7	57.662	3
1108	S169	7	57.806	16
1109	S1830	7	57.905	2
1110	S2295	7	58.316	8
1111	S5310	7	58.784	1
1112	S10152	7	59.046	5
1113	S691	7	59.195	4
1114	S1358	7	59.485	2
1115	S3180	7	59.818	3
1116	S6126	7	60.313	4
1117	S7648	7	60.505	8
1118	S1610	7	60.903	15
1119	S6236	7	61.241	3
1120	S4557	7	61.645	1
1121	S2710	7	62.083	3
1122	S2150	7	62.67	2
1123	S12816	7	63.282	4
1124	S9894	7	63.472	5
1125	S2331	7	64.114	9
1126	S969	7	64.566	9
1127	S2656	7	64.848	3
1128	S7767	7	65.332	1
1129	S1404	7	65.581	5
1130	S7990	7	66.258	10
1131	S4625	7	66.431	4
1132	S3514	7	66.528	1
1133	S2543	7	66.877	8
1134	S8554	7	67.345	5
1135	S19556	7	67.603	1
1136	S19052	7	67.878	2
1137	S1994	7	68.622	5
1138	S397	7	68.979	14
1139	S3025	7	69.273	6
1140	S6479	7	69.928	7
1141	S1727	7	70.639	4
1142	S398	7	70.85	7
1143	S321	7	71.59	10
1144	S15773	7	72.631	3
1145	S7307	7	73.012	3
1146	S13	7	73.318	31
1147	S2900	7	73.81	1
1148	S1637	7	74.175	2
1149	S701	7	74.346	2
1150	S735	7	74.837	8
1151	S11023	7	75.534	2
1152	S3335	7	76.115	8
1153	S5044	7	76.538	4
1154	S1114	7	77.621	11
1155	S10967	7	78.265	1
1156	S3153	7	78.946	3
1157	S4739	7	79.554	5
1158	S9725	7	80.656	1
1159	S9094	7	83.211	2
1160	S3553	7	84.088	2
1161	S1102	7	86.339	13
1162	S1220	7	87.599	1
1163	S483	7	88.433	10
1164	S98	7	89.57	45
1165	S2300	7	90.558	10
1166	S456	7	91.304	20
1167	S148	7	92.069	7
1168	S17173	7	93.436	6
1169	S2533	7	94.662	1
1170	S960	7	95.954	2
1171	S9740	7	97.42	8
1172	S11738	7	98.243	3
1173	S3115	7	99.392	1
1174	S3477	7	100.165	2
1175	S964	7	101.537	7
1176	TERI_JcSSR2741	7	102.532	0
1177	S3186	7	103.339	4
1178	S3850	7	104.986	6
1179	S1909	7	107.102	3
1180	S5753	7	109.104	1
1181	E-ACTXM-CTA03	8	0	0
1182	S2985	8	6.91	11
1183	S57	8	11.536	27
1184	S11643	8	12.197	4
1185	S27170	8	16.584	1
1186	S1927	8	19.119	6
1187	S497	8	19.857	11
1188	S404	8	21.034	6
1189	S22	8	21.576	22
1190	S2147	8	22.803	6
1191	S1003	8	23.803	6
1192	S232	8	25.27	19
1193	S379	8	26.596	13
1194	S7026	8	27.926	1
1195	S1651	8	29.36	2
1196	S9408	8	29.781	4
1197	S9905	8	30.411	3
1198	S2562	8	31.325	10
1199	S348	8	32.1	4
1200	S2338	8	33.216	4
1201	S36	8	33.556	16
1202	S1748	8	35.266	2
1203	S1573	8	37.414	2
1204	S1153	8	38.578	1
1205	S74	8	41.411	9
1206	S84	8	47.59	3
1207	S6267	8	50.733	15
1208	S1788	8	52.467	2
1209	S3298	8	54.961	2
1210	E-AAGXM-CAT06	8	56.337	0
1211	S652	8	57.959	1
1212	S110	8	59.427	5
1213	S229	8	60.352	2
1214	S5837	8	62.596	6
1215	S3731	8	63.337	2
1216	S9152	8	63.984	1
1217	S7128	8	64.72	1
1218	S188	8	65.18	6
1219	S24	8	65.78	5
1220	S13027	8	66.355	5
1221	S12052	8	66.75	2
1222	S2756	8	67.221	3
1223	S12	8	67.54	12
1224	S8972	8	67.877	1
1225	S5097	8	68.193	4
1226	S6983	8	68.347	2
1227	S6851	8	68.731	4
1228	S462	8	69.345	4
1229	S3245	8	69.467	4
1230	S14427	8	69.843	3
1231	S7559	8	70.121	5
1232	S1089	8	70.49	2
1233	S1910	8	70.98	10
1234	S3578	8	71.067	2
1235	S7887	8	71.328	2
1236	S4170	8	71.556	6
1237	S11028	8	71.693	5
1238	S1629	8	72.187	1
1239	S1647	8	72.538	1
1240	S966	8	72.984	2
1241	S893	8	73.364	10
1242	S6676	8	73.636	1
1243	S32	8	73.83	2
1244	S1294	8	73.936	4
1245	S2913	8	73.999	4
1246	S2894	8	74.065	2
1247	S3194	8	74.362	6
1248	S2349	8	74.664	2
1249	S2687	8	75.012	1
1250	S5483	8	75.264	4
1251	S2979	8	75.526	1
1252	S6347	8	75.724	4
1253	S1961	8	75.878	4
1254	S7634	8	76.023	4
1255	S470	8	76.079	5
1256	S259	8	76.338	13
1257	S7152	8	76.463	4
1258	S8151	8	77.023	2
1259	S2168	8	77.55	7
1260	S12091	8	77.782	3
1261	S3903	8	78.264	3
1262	S21439	8	78.684	2
1263	S8644	8	79.137	3
1264	S2628	8	79.527	2
1265	S2084	8	79.965	3
1266	SJCR4U39008	8	80.288	3
1267	S13983	8	80.677	1
1268	S166	8	81.187	9
1269	S773	8	81.443	12
1270	S3885	8	81.69	8
1271	S1014	8	82.131	15
1272	S3296	8	82.569	1
1273	S4921	8	83.061	1
1274	S929	8	83.587	5
1275	S1446	8	84.34	1
1276	S4412	8	84.946	2
1277	S11834	8	85.366	2
1278	S9487	8	85.849	3
1279	S1648	8	87.045	11
1280	E-ACAXM-CTA04	8	88.704	0
1281	E-AACXM-CTA08	8	89.294	0
1282	S3364	8	90.693	1
1283	E-ACTXM-CTA06	9	0	0
1284	S14414	9	4.303	2
1285	S8291	9	6.616	2
1286	E-ACTXM-CTA12	9	8.386	0
1287	S3302	9	10.256	1
1288	S7198	9	11.866	1
1289	S206	9	13.412	10
1290	S6185	9	13.532	4
1291	S194	9	15.172	8
1292	S1565	9	15.485	2
1293	E-AAGXM-CAT12	9	16.07	0
1294	S5733	9	17.702	2
1295	S4432	9	18.892	2
1296	S978	9	19.873	4
1297	S1952	9	21.861	1
1298	S6679	9	23.202	3
1299	S10	9	23.977	9
1300	S19	9	29.411	2
1301	E-ACAXM-CTG04	9	31.515	0
1302	S56	9	35.27	8
1303	W_Jatr698	9	36.937	0
1304	S2186	9	37.631	3
1305	S998	9	39.549	5
1306	S2545	9	41.231	7
1307	S6273	9	43.376	3
1308	S783	9	45.509	11
1309	S8160	9	47.133	4
1310	S128	9	47.349	20
1311	S5453	9	47.787	2
1312	S1733	9	48.18	6
1313	S7479	9	49.315	1
1314	S2112	9	50.03	7
1315	S855	9	50.886	7
1316	S570	9	51.64	4
1317	S7224	9	53.638	2
1318	S1934	9	54.407	12
1319	S903	9	55.606	14
1320	S71	9	56.461	32
1321	S409	9	56.859	6
1322	S844	9	57.705	8
1323	S4105	9	58.754	2
1324	S8559	9	59.26	2
1325	S10051	9	60.051	8
1326	S150	9	61.874	22
1327	S4418	9	62.062	6
1328	S2034	9	64.237	4
1329	S13254	9	65.787	2
1330	S97	9	66.478	10
1331	S1002	9	71.683	6
1332	S85	9	73.49	9
1333	E-ACTXM-CTG06	9	81.653	0
1334	S96	9	83.32	17
1335	S768	9	84.835	3
1336	S151	9	87.878	9
1337	S108	9	90.248	10
1338	S4506	9	92.89	3
1339	S4588	9	101.634	2
1340	E-ACTXM-CTG04	9	110.374	0
1341	E-ACAXM-CTG03	10	0	0
1342	S1296	10	5.571	4
1343	S2165	10	8.237	3
1344	S10758	10	9.879	2
1345	S13021	10	10.605	1
1346	S6599	10	11.793	4
1347	S1861	10	13.169	3
1348	S113	10	13.747	9
1349	S6500	10	14.9	2
1350	S1665	10	15.844	2
1351	S1026	10	16.648	3
1352	S2010	10	16.804	1
1353	S2870	10	17.68	3
1354	S2626	10	18.545	5
1355	S18000	10	19.055	2
1356	S5289	10	19.56	6
1357	S14422	10	20.121	2
1358	S6908	10	20.618	2
1359	S540	10	21.227	9
1360	S254	10	21.736	2
1361	S333	10	22.043	4
1362	S1071	10	23.029	5
1363	S2513	10	23.478	6
1364	S977	10	24.234	4
1365	S1421	10	24.794	2
1366	S9090	10	25.647	4
1367	S5700	10	26.944	4
1368	S331	10	27.094	2
1369	S525	10	27.469	2
1370	S430	10	30.823	2
1371	S6539	10	34.937	4
1372	S2095	10	35.53	1
1373	S10011	10	36.639	3
1374	S2004	10	37.616	3
1375	S8629	10	37.984	4
1376	S7359	10	38.784	2
1377	S365	10	39.666	1
1378	S4098	10	40.534	1
1379	S17185	10	41.369	2
1380	S2280	10	41.925	1
1381	S5577	10	43.153	1
1382	S19703	10	43.992	2
1383	S5414	10	44.656	2
1384	S3830	10	45.318	2
1385	S1188	10	47.012	5
1386	S9302	10	47.972	2
1387	S4684	10	49.607	2
1388	S350	10	50.94	1
1389	S1073	10	53.169	6
1390	S4809	10	55.572	6
1391	S798	10	56.542	8
1392	E-ACAXM-CAT06	10	58.628	0
1393	S1164	10	61.532	4
1394	S14146	10	62.505	2
1395	S11638	10	63.669	1
1396	E-AACXM-CTA10a	10	65.066	0
1397	S4072	10	67.43	4
1398	S1751	10	70.416	3
1399	S73	10	75.145	6
1400	S5675	10	79.774	3
1401	S785	11	0	4
1402	S1884	11	5.105	1
1403	S1567	11	7.639	5
1404	S21	11	8.623	13
1405	S1215	11	9.352	4
1406	S758	11	11.23	3
1407	S5	11	17.314	27
1408	S5166	11	18.932	2
1409	S11084	11	21.499	4
1410	S136	11	22.522	2
1411	S1101	11	22.987	6
1412	S811	11	24.671	9
1413	S87	11	26.7	7
1414	S8601	11	30.983	5
1415	S297	11	36.397	6
1416	S620	11	36.465	2
1417	S10460	11	38.706	3
1418	E-ACTXM-CAT04	11	41.302	0
1419	S1030	11	44.136	6
1420	E-AACXM-CAT12	11	44.958	0
1421	S9138	11	46.422	2
1422	S3927	11	47.667	3
1423	S11241	11	49.05	3
1424	S1957	11	49.937	1
1425	S1289	11	50.401	1
1426	S7235	11	51.586	2
1427	S5986	11	52.469	1
1428	S3900	11	53.443	3
1429	S7919	11	54.448	1
1430	S27044	11	55.045	3
1431	S299	11	55.389	7
1432	S15726	11	56.075	1
1433	S8463	11	56.978	1
1434	S1750	11	57.766	3
1435	S8119	11	58.182	1
1436	S8740	11	59.425	4
1437	S16319	11	59.593	2
1438	S1032	11	59.866	4
1439	S3654	11	60.121	8
1440	S9974	11	60.677	6
1441	S1919	11	60.875	8
1442	S645	11	61.011	10
1443	S846	11	61.352	2
1444	S6527	11	62.044	4
1445	S3168	11	62.632	4
1446	S4431	11	63.151	5
1447	S2260	11	63.651	1
1448	S1661	11	64.218	14
1449	S2825	11	64.948	4
1450	S3326	11	65.501	7
1451	S7531	11	65.83	2
1452	S2068	11	66.709	4
1453	S2555	11	67.046	1
1454	S1686	11	68.058	2
1455	S5852	11	69.176	2
1456	S5086	11	69.2	6
1457	S11823	11	69.589	1
1458	S1011	11	69.994	5
1459	S7995	11	70.329	2
1460	S4708	11	70.97	4
1461	S7341	11	71.717	1
1462	S3024	11	72.388	2
1463	S453	11	72.729	8
1464	S4093	11	72.902	4
1465	S2847	11	73.67	9
1466	S2431	11	74.1	2
1467	S8593	11	74.593	1
1468	S12473	11	75.536	1
1469	S1570	11	75.903	1
1470	S5363	11	76.931	1
1471	S1673	11	77.859	3
1472	S4575	11	78.331	9
1473	S4179	11	79.397	1
1474	S1662	11	81.169	2
1475	S290	11	82.096	10
1476	S29	11	83.114	6
1477	S234	11	84.343	18
1478	E-AAGXM-CAT09	11	85.888	0
1479	S4591	11	87.373	2
1480	S857	11	88.59	5
1481	S13205	11	89.458	3
1482	S1005	11	90.647	3

## Sheet: JatCur_1.0 Map Marker Position
Supplementary Table S4b: Linkage map positions of AFLP and microsatellite markers, and JatCur_1.0 ccaffolds, and the number of SNPs per scaffold
No.	Locus	Group	Position	No. of SNPs/Scaffold
1	E-AACXM-CAT04	1	0	0
2	W_Jcuint070	1	2.886	0
3	S521_Wu	1	9.094	1
4	S478_Wu	1	12.405	1
5	S206_Wu	1	13.66	4
6	S202_Wu	1	18.352	1
7	S681_Wu	1	20.163	2
8	S314_Wu	1	20.871	1
9	S139_Wu	1	21.748	6
10	S116_Wu	1	23.982	27
11	E-ACTXM-CTA03a	1	24.642	0
12	W_Jcuint220	1	25.828	0
13	S362_Wu	1	26.211	4
14	S1036_Wu	1	26.836	3
15	S593_Wu	1	27.199	3
16	S903_Wu	1	27.235	4
17	S482_Wu	1	27.286	1
18	S163_Wu	1	27.388	4
19	S494_Wu	1	27.508	3
20	S57_Wu	1	27.591	10
21	S287_Wu	1	27.627	12
22	S37_Wu	1	27.633	9
23	S114_Wu	1	27.678	2
24	S659_Wu	1	27.704	6
25	S268_Wu	1	27.719	4
26	S355_Wu	1	27.982	2
27	S55_Wu	1	28.128	9
28	S393_Wu	1	28.873	14
29	S43_Wu	1	30.681	28
30	S264_Wu	1	30.707	12
31	S675_Wu	1	30.77	17
32	S2362_Wu	1	30.953	2
33	S477_Wu	1	31.314	1
34	S469_Wu	1	32.382	6
35	S465_Wu	1	33.236	17
36	S123_Wu	1	34.568	2
37	S147_Wu	1	36.184	1
38	E-ACTXM-CAT02	1	38.407	0
39	S108_Wu	1	39.566	183
40	E-ACTXM-CTG08	1	41.973	0
41	W_Jcuint349	1	42.682	0
42	E-ACTXM-CTA04	1	45.672	0
43	S1969_Wu	1	46.778	5
44	S31_Wu	1	50.06	1
45	S419_Wu	1	50.412	1
46	S359_Wu	1	51.51	33
47	E-ACAXM-CTA11	1	53.28	0
48	S119_Wu	1	56.951	129
49	S542_Wu	1	71.498	70
50	E-AACXM-CAT06	1	76.415	0
51	S84_Wu	2	0	189
52	E-AACXM-CAT07	2	5.935	0
53	S1565_Wu	2	13.079	1
54	E-AACXM-CAG06	2	16.142	0
55	E-ACAXM-CAT09	2	20.667	0
56	S191_Wu	2	22.262	120
57	E-AAXM-CTG05	2	23.81	0
58	S956_Wu	2	27.137	1
59	S395_Wu	2	28.435	1
60	S762_Wu	2	29.739	1
61	E-ACTXM-CTG07	2	31.466	0
62	S404_Wu	2	33.706	1
63	S930_Wu	2	35.007	2
64	S547_Wu	2	36.383	1
65	S18_Wu	2	37.729	154
66	S304_Wu	2	37.946	12
67	S324_Wu	2	38.348	21
68	S44_Wu	2	38.67	3
69	S376_Wu	2	40.163	1
70	S217_Wu	2	40.883	3
71	S421_Wu	2	40.986	6
72	S155_Wu	2	41.697	5
73	S1936_Wu	2	42.251	4
74	S595_Wu	2	42.31	40
75	S386_Wu	2	42.764	3
76	S138_Wu	2	42.827	3
77	S12_Wu	2	43.039	3
78	S406_Wu	2	43.124	1
79	S471_Wu	2	43.346	4
80	S302_Wu	2	43.358	3
81	S712_Wu	2	43.403	5
82	S647_Wu	2	43.499	3
83	S129_Wu	2	43.534	14
84	S1376_Wu	2	43.548	1
85	S1_Wu	2	43.885	2
86	S814_Wu	2	44.169	1
87	S354_Wu	2	44.609	3
88	S540_Wu	2	45.329	31
89	S96_Wu	2	46.257	151
90	S246_Wu	2	47.408	1
91	E-AACXM-CAG04	2	49.015	0
92	S479_Wu	2	50.164	2
93	S531_Wu	2	52.772	1
94	S520_Wu	2	53.69	2
95	S262_Wu	2	55.222	1
96	S236_Wu	2	57.254	1
97	E-ACAXM-CTA09	2	58.587	0
98	S67_Wu	2	60.377	25
99	E-AACXM-CAT10	2	61.57	0
100	S79_Wu	2	62.084	83
101	E-AACXM-CAG08	2	67.127	0
102	E-AAGXM-CAT14	2	74.146	0
103	S183_Wu	2	77.473	1
104	S684_Wu	3	0	339
105	E-AACXM-CTA02	3	12.782	0
106	E-AACXM-CTA12	3	13.555	0
107	S160_Wu	3	19.203	136
108	E-AACXM-CTA06	3	20.552	0
109	S552_Wu	3	35.665	1
110	S484_Wu	3	37.649	1
111	S252_Wu	3	39.101	1
112	S385_Wu	3	40.827	1
113	S384_Wu	3	41.483	1
114	S456_Wu	3	42.63	2
115	S581_Wu	3	43.225	2
116	S26_Wu	3	45.215	60
117	S50_Wu	3	45.653	2
118	S1137_Wu	3	46.082	3
119	S102_Wu	3	46.119	1
120	S34_Wu	3	46.339	6
121	S1122_Wu	3	46.377	3
122	S290_Wu	3	46.514	5
123	S300_Wu	3	46.58	13
124	S338_Wu	3	46.684	1
125	S168_Wu	3	46.713	2
126	S490_Wu	3	46.724	8
127	S579_Wu	3	46.744	10
128	S200_Wu	3	47.273	14
129	S718_Wu	3	47.535	4
130	S148_Wu	3	47.852	2
131	S496_Wu	3	48.406	3
132	E-AAGXM-CAT01	3	49.425	0
133	E-ACAXM-CTA13	3	50.426	0
134	S27_Wu	3	50.961	125
135	E-AAGXM-CAT03	3	53.368	0
136	S925_Wu	3	57.926	1
137	E-AACXM-CAT09	3	68.229	0
138	S221_Wu	4	0	73
139	S159_Wu	4	5.839	107
140	E-AACXM-CAT05	4	7.443	0
141	S46_Wu	4	22.68	222
142	E-ACAXM-CAT08	4	24.501	0
143	S907_Wu	4	28.936	2
144	S2654_Wu	4	34.484	5
145	S339_Wu	4	37.042	83
146	S941_Wu	4	41.513	1
147	S585_Wu	4	43.706	5
148	S639_Wu	4	46.353	2
149	S320_Wu	4	46.916	6
150	S269_Wu	4	47.173	1
151	S358_Wu	4	47.32	9
152	S1173_Wu	4	47.422	10
153	S307_Wu	4	47.441	5
154	S15_Wu	4	47.524	4
155	S711_Wu	4	47.567	4
156	S1168_Wu	4	47.591	1
157	S312_Wu	4	47.644	6
158	S86_Wu	4	47.827	41
159	S310_Wu	4	48.282	1
160	S120_Wu	4	48.701	6
161	S89_Wu	4	49.764	2
162	S498_Wu	4	51.03	3
163	S705_Wu	4	53.139	1
164	S401_Wu	4	56.677	4
165	S5_Wu	4	61.243	104
166	S1514_Wu	4	63.796	1
167	S611_Wu	4	67.206	24
168	E-ACAXM-CAT04	4	73.117	0
169	E-ACTXM-CAT06	4	79.421	0
170	E-ACAXM-CTG01	4	90.722	0
171	S145_Wu	5	0	4
172	S1198_Wu	5	8.04	1
173	E-AAGXM-CAT10	5	12.281	0
174	S665_Wu	5	18.68	1
175	S107_Wu	5	20.917	1
176	S267_Wu	5	24.432	1
177	S146_Wu	5	26.067	2
178	S257_Wu	5	26.773	1
179	S523_Wu	5	27.595	51
180	S311_Wu	5	28.779	1
181	S650_Wu	5	29.039	4
182	S913_Wu	5	29.483	7
183	S32_Wu	5	29.585	4
184	S318_Wu	5	29.748	3
185	S332_Wu	5	29.766	20
186	S101_Wu	5	29.996	4
187	S234_Wu	5	30.08	10
188	S260_Wu	5	30.102	6
189	S1250_Wu	5	30.128	2
190	S95_Wu	5	30.146	7
191	S251_Wu	5	30.195	109
192	S158_Wu	5	30.24	3
193	S208_Wu	5	30.274	9
194	S1991_Wu	5	30.448	2
195	S424_Wu	5	30.496	5
196	S984_Wu	5	30.718	2
197	S515_Wu	5	30.94	2
198	S3_Wu	5	31.307	19
199	S374_Wu	5	31.611	2
200	S572_Wu	5	33.277	1
201	E-ACAXM-CTA01	5	34.47	0
202	S976_Wu	5	35.268	2
203	E-AAGXM-CAT02	5	36.053	0
204	S1106_Wu	5	38.951	1
205	E-ACTXM-CTG01	5	39.74	0
206	S568_Wu	5	40.497	1
207	TERI_JcSSR2626	5	43.175	0
208	W_Jatr739	5	44.012	0
209	S328_Wu	5	49.987	249
210	W_Jcuint002	5	52.699	0
211	S403_Wu	5	53.516	1
212	E-ACTXM-CAT07	5	72.391	0
213	S906_Wu	5	80.631	221
214	E-AAXM-CTG01	5	85.627	0
215	S2166_Wu	5	89.497	9
216	S734_Wu	5	90.64	42
217	E-ACTXM-CTA13	5	101.352	0
218	E-AAGXM-CAT15	6	0	0
219	E-AAXM-CTG03	6	14	0
220	S273_Wu	6	18.294	2
221	S473_Wu	6	21.57	55
222	S729_Wu	6	23.925	12
223	S565_Wu	6	24.969	2
224	S682_Wu	6	28.041	29
225	S897_Wu	6	32.239	17
226	S349_Wu	6	33.925	3
227	S1286_Wu	6	34.18	14
228	S201_Wu	6	35.621	10
229	E-AACXM-CAG05	6	36.366	0
230	E-ACTXM-CTA07	6	37.306	0
231	S241_Wu	6	40.324	56
232	S944_Wu	6	42.152	1
233	S1559_Wu	6	43.422	1
234	S106_Wu	6	44.422	2
235	S161_Wu	6	44.989	1
236	S1334_Wu	6	46.242	1
237	S948_Wu	6	46.814	1
238	S604_Wu	6	47.462	1
239	E-ACTXM-CTA10	6	48.579	0
240	S699_Wu	6	49.015	1
241	S958_Wu	6	49.241	2
242	S1781_Wu	6	50.088	1
243	S156_Wu	6	50.365	1
244	S485_Wu	6	50.45	1
245	S192_Wu	6	50.521	5
246	S69_Wu	6	50.835	3
247	S151_Wu	6	50.995	1
248	S1002_Wu	6	51.258	4
249	S1056_Wu	6	51.676	3
250	S407_Wu	6	51.946	2
251	S258_Wu	6	52.477	6
252	S199_Wu	6	52.493	3
253	S475_Wu	6	52.518	4
254	S709_Wu	6	52.734	1
255	S1174_Wu	6	52.854	1
256	S389_Wu	6	53.262	5
257	S250_Wu	6	54.515	68
258	S845_Wu	6	55.248	1
259	S843_Wu	6	56.897	55
260	S196_Wu	6	57.658	1
261	S1457_Wu	6	58.408	1
262	E-ACTXM-CTA05	6	63.85	0
263	S1055_Wu	6	64.964	42
264	S1078_Wu	6	66.355	69
265	S247_Wu	6	68.66	3
266	S122_Wu	6	70.985	105
267	S2033_Wu	6	73.274	16
268	E-ACTXM-CTG09	6	75.375	0
269	E-AAXM-CTG04	6	76.447	0
270	S1266_Wu	6	77.201	2
271	S779_Wu	6	90.79	291
272	S813_Wu	7	-13.516	1
273	S975_Wu	7	-8.374	1
274	TERI_JcSSR2742	7	0	0
275	E-ACAXM-CTA12	7	2.499	0
276	E-ACTXM-CTA11	7	5.082	0
277	E-ACTXM-CAT05	7	7.284	0
278	S170_Wu	7	9.808	2
279	S870_Wu	7	11.352	1
280	S502_Wu	7	12.67	300
281	W_Jatr845	7	13.977	0
282	S61_Wu	7	15.499	1
283	S1579_Wu	7	17.182	1
284	TERI_JcSSR2749	7	18.597	0
285	S42_Wu	7	19.708	62
286	S1121_Wu	7	21.163	11
287	E-AAXM-CTG06	7	21.719	0
288	S1149_Wu	7	22.512	8
289	S529_Wu	7	22.797	53
290	S390_Wu	7	22.804	38
291	S838_Wu	7	22.88	9
292	S391_Wu	7	23.657	3
293	S143_Wu	7	24.136	5
294	S653_Wu	7	24.547	1
295	S708_Wu	7	24.976	20
296	S82_Wu	7	25.199	12
297	S749_Wu	7	25.253	23
298	S430_Wu	7	25.361	13
299	S878_Wu	7	25.379	10
300	S410_Wu	7	25.483	6
301	S657_Wu	7	25.49	7
302	S551_Wu	7	25.597	14
303	S414_Wu	7	25.628	3
304	S508_Wu	7	25.642	4
305	S255_Wu	7	26.028	73
306	S578_Wu	7	26.565	2
307	S1762_Wu	7	26.885	1
308	S431_Wu	7	27.582	2
309	E-AAGXM-CAT11	7	28.263	0
310	S8_Wu	7	30.541	40
311	S537_Wu	7	31.083	42
312	S1103_Wu	7	33.018	2
313	E-ACAXM-CAT05	7	36.022	0
314	E-ACTXM-CTA04a	7	37.559	0
315	S795_Wu	7	39.873	1
316	S341_Wu	7	41.982	220
317	S1296_Wu	7	46.581	1
318	S2976_Wu	7	50.33	1
319	S1445_Wu	7	58.926	1
320	S905_Wu	7	67.949	101
321	TERI_JcSSR2741	7	80.374	0
322	E-AAGXM-CAT06	8	0	0
323	E-ACAXM-CTA04	8	7.732	0
324	S470_Wu	8	10.519	1
325	S76_Wu	8	11.821	3
326	S664_Wu	8	12.362	2
327	S51_Wu	8	12.703	2
328	S1327_Wu	8	13.601	2
329	S1081_Wu	8	14.127	1
330	S1855_Wu	8	15.224	38
331	S259_Wu	8	15.603	9
332	S550_Wu	8	15.783	23
333	S1005_Wu	8	16.345	2
334	S41_Wu	8	16.981	12
335	S1074_Wu	8	17.115	2
336	S363_Wu	8	17.439	31
337	S226_Wu	8	17.519	12
338	S49_Wu	8	17.635	5
339	S128_Wu	8	17.818	4
340	S983_Wu	8	18.005	4
341	S136_Wu	8	18.178	3
342	S315_Wu	8	18.303	15
343	S230_Wu	8	18.504	3
344	S127_Wu	8	18.664	33
345	S509_Wu	8	19.084	2
346	S636_Wu	8	19.263	4
347	S297_Wu	8	19.825	19
348	S399_Wu	8	21.025	1
349	S229_Wu	8	22.103	3
350	S23_Wu	8	22.468	40
351	S594_Wu	8	24.34	1
352	S1719_Wu	8	26.236	1
353	E-AACXM-CTA08	8	28.06	0
354	S185_Wu	8	33.788	2
355	E-ACTXM-CTG04	9	0	0
356	W_Jatr324	9	22.764	0
357	E-ACTXM-CTG06	9	26.398	0
358	S660_Wu	9	35.159	235
359	S799_Wu	9	41.015	2
360	W_Jatr698	9	47.821	0
361	S137_Wu	9	54.509	64
362	E-AACXM-CAT08a	9	56.142	0
363	S617_Wu	9	57.892	55
364	E-AAGXM-CAT13	9	61.426	0
365	S382_Wu	9	64.68	1
366	S174_Wu	9	66.831	1
367	E-ACTXM-CTA01	9	68.623	0
368	E-AAGXM-CAT07	9	69.172	0
369	S1210_Wu	9	70.223	7
370	S366_Wu	9	71.325	10
371	S733_Wu	9	71.434	17
372	S39_Wu	9	72.937	2
373	S759_Wu	9	73.641	1
374	S285_Wu	9	74.073	16
375	S150_Wu	9	74.524	2
376	S22_Wu	9	74.666	3
377	S1033_Wu	9	75.132	2
378	S242_Wu	9	75.426	1
379	S173_Wu	9	75.79	4
380	S103_Wu	9	75.811	3
381	S175_Wu	9	75.894	4
382	S413_Wu	9	75.951	4
383	E-AACXM-CTA11	9	76.274	0
384	S1369_Wu	9	76.665	2
385	S70_Wu	9	76.781	4
386	E-ACTXM-CAT08	9	77.156	0
387	S898_Wu	9	77.978	22
388	S2_Wu	9	79.174	38
389	S388_Wu	9	79.721	4
390	S223_Wu	9	79.81	5
391	E-ACAXM-CAT10	9	80.109	0
392	S872_Wu	9	80.265	14
393	S72_Wu	9	82.6	34
394	E-ACTXM-CTA12	9	85.191	0
395	E-AACXM-CAG03	9	87.692	0
396	S815_Wu	9	89.07	12
397	E-ACTXM-CTA06	9	93.924	0
398	S805_Wu	10	0	2
399	E-ACAXM-CTG03	10	13.882	0
400	S1735_Wu	10	18.627	20
401	E-ACAXM-CAT11	10	20.196	0
402	S48_Wu	10	22.686	42
403	S165_Wu	10	26.105	21
404	S104_Wu	10	28.581	34
405	S539_Wu	10	31.616	4
406	S265_Wu	10	31.656	1
407	S266_Wu	10	31.827	18
408	S210_Wu	10	32.048	5
409	S47_Wu	10	33.411	34
410	S1769_Wu	10	34.545	1
411	S357_Wu	10	38.802	1
412	S45_Wu	10	40.019	5
413	S80_Wu	10	40.304	3
414	E-AACXM-CTA03	10	41.967	0
415	S1304_Wu	10	42.919	1
416	S797_Wu	10	43.172	4
417	S557_Wu	10	43.271	6
418	S133_Wu	10	43.337	6
419	S110_Wu	10	43.343	12
420	S532_Wu	10	43.349	4
421	S1184_Wu	10	43.358	4
422	S544_Wu	10	43.405	3
423	S1114_Wu	10	43.816	2
424	S7_Wu	10	43.886	6
425	S400_Wu	10	44.323	3
426	S91_Wu	10	46.07	10
427	S275_Wu	10	47.198	4
428	S20_Wu	10	47.204	23
429	S528_Wu	10	47.224	4
430	S281_Wu	10	47.245	6
431	S397_Wu	10	48.203	8
432	S63_Wu	10	49.25	12
433	S387_Wu	10	49.854	1
434	S931_Wu	10	52.916	1
435	S464_Wu	10	55.922	9
436	E-ACAXM-CAT06	10	58.798	0
437	S11_Wu	10	61.671	112
438	E-AACXM-CTA10	10	62.705	0
439	E-AAGXM-CAT05	10	63.439	0
440	E-AACXM-CAT01a	10	64.56	0
441	E-AACXM-CTA10a	10	65.289	0
442	E-AACXM-CAT01	10	71.088	0
443	S1365_Wu	10	74.17	26
444	E-AACXM-CTA04	10	76.315	0
445	E-AACXM-CTA13	10	85.47	0
446	S1132_Wu	11	0	1
447	S438_Wu	11	1.863	1
448	S330_Wu	11	5.123	1
449	E-ACTXM-CAT03	11	5.786	0
450	E-AACXM-CAT12	11	9.282	0
451	S365_Wu	11	12.93	98
452	S77_Wu	11	16.025	5
453	S276_Wu	11	18.661	17
454	S1360_Wu	11	20.435	1
455	S613_Wu	11	20.815	4
456	S135_Wu	11	21.122	6
457	S16_Wu	11	21.698	3
458	E-AAGXM-CAT08	11	22.396	0
459	S466_Wu	11	23.177	2
460	S1045_Wu	11	23.574	3
461	S218_Wu	11	23.787	6
462	S693_Wu	11	23.8	2
463	S690_Wu	11	23.806	3
464	S336_Wu	11	23.895	3
465	S141_Wu	11	24.615	9
466	S75_Wu	11	24.694	8
467	S645_Wu	11	24.776	18
468	S974_Wu	11	24.851	8
469	S331_Wu	11	24.889	1
470	S177_Wu	11	25.534	10
471	S240_Wu	11	26.022	11
472	S488_Wu	11	27.415	32
473	S890_Wu	11	29.572	1
474	S713_Wu	11	32.303	1
475	E-AAGXM-CAT09	11	35.576	0
476	S394_Wu	11	38.601	1
477	E-ACTXM-CAT04	11	40.957	0
478	S437_Wu	11	41.763	1
479	S153_Wu	11	42.615	40
480	S435_Wu	11	43.157	1
481	W_Jatr684	11	45.628	0
482	E-AAGXM-CAT04	11	48.103	0
483	E-ACAXM-CAT07	11	56.025	0
484	W_Jcuint020	11	58.623	0
485	S211_Wu	11	63.425	249
486	E-ACAXM-CAT03	11	71.713	0
				7698
