# Supplementary material for: Ultra-High-Density Genetic Maps of Jatropha curcas × Jatropha integerrima and Anchoring Jatropha curcas Genome Assembly Scaffolds
Source: MDPI journal article supplement (doi:10.3390/f14091907), 2023-09-19
Supplement: s1 [file s1 › Supplementary Table S5_JatCur_1.0 Scaffold Genotype Average.xlsx]

## Sheet: JatCur_1.0_Scaffold Av Genotype
Supplementary Table S5. The average Jat_r4.5 scaffold SNP genotype value calculation. While constructing linkage map, scaffolds with an average below 0.5 were categorized as "a," indicating a lower value, while those with an average above 0.5 were labeled as "h," representing a higher value. Any scaffolds with an average of exactly 0.5 were treated as missing data.
Scaffolds	chrom	BC1_35:C4Y4MACXX:5:250355293	BC1_04:C4Y4MACXX:5:250355263	BC1_91:C4Y4MACXX:5:250355344	BC1_13:C4Y4MACXX:5:250355272	BC1_51:C4Y4MACXX:5:250355306	BC1_60:C4Y4MACXX:5:250355315	BC1_73:C4Y4MACXX:5:250355328	BC1_22:C4Y4MACXX:5:250355281	BC1_08:C4Y4MACXX:5:250355267	BC1_69:C4Y4MACXX:5:250355324	BC1_47:C4Y4MACXX:5:250355302	BC1_87:C4Y4MACXX:5:250355340	BC1_95:C4Y4MACXX:5:250355348	BC1_26:C4Y4MACXX:5:250355285	BC1_44:C4Y4MACXX:5:250355299	BC1_65:C4Y4MACXX:5:250355320	BC1_43:C4Y4MACXX:5:250355298	BC1_52:C4Y4MACXX:5:250355307	BC1_92:C4Y4MACXX:5:250355345	BC1_27:C4Y4MACXX:5:250355286	BC1_68:C4Y4MACXX:5:250355323	BC1_96:C4Y4MACXX:5:250355349	BC1_64:C4Y4MACXX:5:250355319	BC1_56:C4Y4MACXX:5:250355311	BC1_90:C4Y4MACXX:5:250355343	BC1_05:C4Y4MACXX:5:250355264	BC1_14:C4Y4MACXX:5:250355273	BC1_23:C4Y4MACXX:5:250355282	BC1_81:C4Y4MACXX:5:250355335	BC1_12:C4Y4MACXX:5:250355271	BC1_50:C4Y4MACXX:5:250355305	BC1_38:C4Y4MACXX:5:250355296	BC1_99:C4Y4MACXX:5:250355350	BC1_59:C4Y4MACXX:5:250355314	BC1_57:C4Y4MACXX:5:250355312	BC1_36:C4Y4MACXX:5:250355294	BC1_66:C4Y4MACXX:5:250355321	BC1_30:C4Y4MACXX:5:250355289	BC1_21:C4Y4MACXX:5:250355280	BC1_29:C4Y4MACXX:5:250355288	BC1_82:C4Y4MACXX:5:250355336	BC1_37:C4Y4MACXX:5:250355295	BC1_58:C4Y4MACXX:5:250355313	BC1_74:C4Y4MACXX:5:250355329	BC1_15:C4Y4MACXX:5:250355274	BC1_80:C4Y4MACXX:5:250355334	BC1_24:C4Y4MACXX:5:250355283	BC1_71:C4Y4MACXX:5:250355326
S1_227016	1	0	1	0	1	0	0	0	1	0	0	0	0	1	1	1	0	0	1	1	0	0	1	0	1	1	0	0	0	0	1	0	0	1	1	1	0	1	1	0	1	0	0	1	0	1	0	0	1
S1_344995	1	0	1	0	1	0	0	0	0	0	1	0	0	1	1	1	0	0	1	1	0	1	1	0	0	1	0	1	0	1	1	0	0	1	1	0	0	1	1	0	1	0	0	1	0	1	0	0	1
	1 Average	0	1	0	1	0	0	0	0.5	0	0.5	0	0	1	1	1	0	0	1	1	0	0.5	1	0	0.5	1	0	0.5	0	0.5	1	0	0	1	1	0.5	0	1	1	0	1	0	0	1	0	1	0	0	1
S2_54658	2	1	1	0	1	0	1	0	1	1	0	0	0	1	0	0	0	1	0	0	0	1	0	0	0	0	1	0	1	1	0	0	0	0	0	1	1	0	0	1	1	1	0	0	0	1	1	0	0
S2_249128	2	1	1	0	1	0	1	0	1	1	0	0	0	1	0	0	0	1	0	0	0	1	0	0	0	0	1	0	1	1	0	0	0	0	0	1	1	0	0	1	1	1	0	0	0	1	1	0	0
S2_250099	2	1	1	0	1	0	1	0	1	1	0	0	0	1	0	0	0	1	0	0	0	1	0	0	0	0	1	0	1	1	0	0	0	0	0	1	1	0	0	1	1	1	0	0	0	0	1	0	0
S2_250343	2	0	1	0	1	0	0	0	0	1	0	0	0	1	0	0	0	1	0	0	0	1	0	0	0	0	1	0	1	0	0	0	0	0	0	1	1	0	0	1	1	1	0	0	0	1	1	0	0
S2_254119	2	1	1	0	1	0	0	0	1	1	0	0	0	0	0	0	0	1	0	0	0	1	0	0	0	0	1	0	1	1	0	0	0	0	0	1	1	0	1	1	1	1	0	0	0	0	1	0	0
S2_330349	2	1	1	0	1	0	1	0	1	1	0	0	0	1	0	0	0	1	0	0	0	1	0	0	0	0	1	0	1	1	0	0	0	0	0	1	1	0	0	1	1	1	0	0	0	1	1	0	0
S2_389962	2	-	1	0	1	0	0	0	1	1	0	0	0	1	0	0	0	0	0	0	0	1	0	0	0	0	1	0	1	1	0	0	0	0	0	1	1	0	0	1	0	1	0	0	0	1	1	0	0
S2_508219	2	1	1	0	1	0	1	0	1	1	0	0	0	1	0	0	0	1	0	0	0	1	0	0	0	0	1	0	1	1	0	0	0	0	0	1	1	0	0	1	1	1	0	0	0	1	1	0	0
S2_521872	2	1	1	0	1	0	1	0	1	1	0	0	0	1	0	0	0	1	0	0	0	1	0	0	0	0	1	0	1	1	0	0	0	0	0	1	1	0	0	1	1	1	0	0	0	1	1	0	0
S2_523653	2	1	1	0	1	0	0	0	1	1	0	0	0	1	0	0	0	1	0	0	0	1	0	0	0	0	1	0	1	1	0	0	0	0	0	1	1	0	0	1	1	1	0	0	0	0	1	0	0
S2_605915	2	1	1	0	1	0	1	0	1	1	0	0	0	1	0	0	0	1	0	0	0	1	0	0	0	0	1	0	1	1	0	0	0	0	0	1	1	0	0	1	1	1	0	0	0	1	1	0	0
S2_621519	2	1	1	0	1	0	1	0	1	1	0	0	0	1	0	0	0	1	0	0	0	1	0	0	0	0	1	0	1	1	0	0	0	0	0	1	1	0	0	1	1	1	0	0	0	1	1	0	0
S2_641277	2	1	1	0	1	0	1	0	1	1	0	0	0	1	0	0	0	1	0	0	0	1	0	0	0	0	1	0	1	1	0	0	0	0	0	1	1	0	0	1	1	1	0	0	0	1	1	0	0
S2_646428	2	1	1	0	1	0	0	0	1	1	0	0	0	1	0	0	0	1	0	0	0	1	0	0	0	0	1	0	1	1	0	0	0	0	0	1	1	0	0	1	1	1	0	0	0	1	1	0	0
S2_648635	2	1	1	0	1	0	1	0	1	1	0	0	0	1	0	0	0	1	0	0	0	1	0	0	0	0	1	0	1	1	0	0	0	0	0	1	1	0	0	1	1	1	0	0	0	1	1	0	0
S2_706163	2	1	1	0	1	0	1	0	1	0	0	0	0	1	0	0	0	1	0	0	0	1	0	0	0	0	1	0	1	1	0	0	0	0	0	1	1	0	0	1	1	1	0	0	0	1	1	0	0
S2_754963	2	1	1	0	1	0	0	0	1	1	0	0	0	1	0	0	0	1	0	0	0	1	0	0	0	0	1	0	1	1	0	0	0	0	0	1	1	0	0	1	1	1	0	0	0	1	1	0	0
S2_930366	2	1	1	0	1	0	-	0	1	1	0	0	0	1	0	0	0	1	0	0	0	1	0	0	0	0	1	0	1	0	0	0	0	0	0	1	1	0	0	1	1	1	0	0	0	1	1	0	0
S2_958874	2	0	1	1	1	0	1	0	1	1	0	0	0	1	0	0	0	1	0	0	0	1	0	0	0	0	1	0	1	1	0	0	0	0	0	1	1	0	0	1	1	1	0	0	0	0	1	0	0
S2_986473	2	1	1	0	1	0	-	0	1	1	0	0	0	1	0	0	0	1	0	0	0	1	0	0	0	0	1	0	1	1	0	0	0	0	0	1	1	0	0	1	1	1	0	0	0	1	1	0	0
S2_993525	2	1	1	0	1	0	1	0	1	1	0	0	0	1	0	0	0	1	0	0	0	1	0	0	0	0	1	0	1	1	0	0	0	0	0	1	1	0	0	1	1	1	0	0	0	1	1	0	0
S2_1004391	2	1	1	0	1	0	0	0	1	1	0	0	0	1	0	0	-	1	0	0	0	1	0	0	0	0	1	0	1	1	0	0	0	0	0	1	1	0	0	1	1	1	0	0	0	0	1	0	0
S2_1007498	2	1	1	0	1	0	1	0	1	-	0	0	-	1	0	0	0	1	0	0	0	1	0	0	0	0	1	0	1	0	0	0	0	0	0	0	1	0	0	1	1	1	0	0	0	0	1	0	0
S2_1066523	2	1	1	0	1	0	1	0	1	1	0	0	0	1	0	0	0	1	0	0	0	1	0	0	0	0	1	0	1	1	0	0	0	0	0	1	1	0	0	1	1	1	0	0	0	1	1	0	0
S2_1080574	2	0	1	0	1	0	1	0	1	1	0	0	0	1	0	-	0	1	0	0	0	0	0	0	0	0	1	0	1	0	0	0	0	0	0	1	1	0	0	1	1	1	0	0	0	1	1	0	0
S2_1084154	2	0	1	0	1	0	1	0	1	1	0	0	0	1	0	0	0	1	0	0	0	1	0	0	0	0	1	0	1	1	0	0	0	0	0	1	1	0	0	1	1	1	0	0	0	1	1	0	0
S2_1133029	2	1	1	0	1	0	1	0	1	1	0	0	0	1	0	0	0	1	0	0	0	1	0	0	0	0	1	0	1	1	0	0	0	0	0	1	1	0	0	1	1	1	0	0	0	1	1	0	0
S2_1133194	2	1	1	0	1	0	0	0	1	1	0	0	0	1	0	0	0	1	0	0	0	1	0	0	0	0	1	0	1	0	0	0	0	0	0	1	1	0	0	1	1	1	0	0	0	0	1	0	0
S2_1133611	2	1	1	0	1	0	0	0	1	1	0	0	0	1	0	0	0	1	0	0	0	0	0	0	0	0	1	0	1	1	0	0	0	0	0	1	1	0	0	1	1	1	0	0	0	0	1	0	0
S2_1175137	2	1	1	0	1	0	1	0	1	1	0	0	0	0	0	0	0	1	0	0	0	1	0	0	0	0	1	0	1	1	0	0	0	0	0	1	1	0	0	1	1	1	0	0	0	1	1	0	0
S2_1175881	2	1	1	0	1	0	0	0	1	1	0	0	0	1	0	0	0	1	0	0	0	1	0	0	0	0	1	0	1	0	0	0	0	0	0	1	1	0	0	1	1	1	0	0	0	1	1	0	0
S2_1241272	2	1	1	0	1	0	1	0	1	1	0	0	0	1	0	0	0	1	0	0	0	1	0	0	0	0	1	0	1	1	0	0	0	0	0	1	1	0	0	1	1	1	0	0	0	1	1	0	0
S2_1254611	2	1	1	-	1	-	0	-	1	1	-	-	-	1	-	-	-	1	-	-	-	0	-	-	-	-	0	-	1	1	0	-	-	-	-	0	1	-	-	1	1	1	-	-	-	1	1	-	-
S2_1273907	2	0	1	0	1	-	1	0	1	1	0	0	0	0	0	0	0	1	0	0	0	1	0	0	0	0	1	0	1	1	0	0	0	0	0	1	1	0	0	1	1	1	0	0	0	-	1	0	0
S2_1319464	2	1	1	0	1	0	1	0	1	1	0	0	0	1	0	0	0	1	0	0	0	1	0	0	0	0	1	0	1	1	0	0	0	0	0	1	1	0	0	1	1	1	0	0	0	1	1	0	0
S2_1323407	2	1	1	0	1	0	0	0	1	0	0	0	0	1	0	0	0	1	0	0	0	1	0	0	0	0	1	0	1	1	-	0	0	0	0	1	1	0	0	1	0	0	0	0	0	1	1	0	0
S2_1341073	2	1	1	0	1	0	1	0	1	1	0	0	0	1	0	0	0	1	0	0	0	1	0	0	0	0	1	0	1	1	0	0	0	0	0	1	1	0	0	1	1	1	0	0	0	1	1	0	0
S2_1356009	2	1	1	0	1	0	0	0	1	1	0	0	0	1	0	0	0	1	0	0	0	1	0	0	0	0	1	0	1	0	-	0	0	0	0	1	1	0	0	1	1	1	0	0	0	1	1	0	0
	2 Average	0.864865	1	0.027027	1	0	0.638889	0	0.973684	0.945946	0	0	0	0.921053	0	0	0	0.973684	0	0	0	0.921053	0	0	0	0	0.973684	0	1	0.815789	0	0	0	0	0	0.947368	1	0	0.027027	1	0.947368	0.973684	0	0	0	0.783784	1	0	0
S3_62936	3	1	0	0	1	-	0	1	1	1	0	1	0	1	0	0	0	0	0	0	0	-	0	1	1	0	1	1	0	0	0	0	0	1	0	1	0	1	1	1	1	0	0	0	0	0	0	0	0
S3_285766	3	1	0	0	1	1	0	1	1	1	0	1	0	1	0	0	0	0	1	0	0	1	0	1	1	0	1	1	1	0	1	0	0	1	0	1	0	1	1	1	1	0	0	0	0	0	0	0	0
S3_350678	3	1	0	0	1	0	-	1	1	1	0	1	0	1	0	-	0	0	0	0	0	0	0	1	1	0	1	1	1	0	1	0	0	1	-	1	0	1	1	1	1	0	0	0	0	0	0	0	0
S3_410649	3	1	0	0	1	0	0	0	1	0	0	1	0	1	0	0	0	0	1	0	0	1	0	1	1	0	1	1	1	0	1	0	0	1	1	1	0	1	1	1	1	0	0	0	0	0	0	0	0
S3_410761	3	1	0	0	1	0	0	1	1	1	0	1	0	1	0	0	0	0	1	0	0	1	0	1	1	0	1	1	1	0	1	0	0	1	0	1	0	1	1	1	1	0	0	0	0	0	0	0	0
S3_451195	3	1	0	0	1	0	0	1	1	1	0	1	-	1	0	1	0	0	0	0	0	0	0	1	1	0	0	1	1	0	0	0	0	1	-	1	0	1	1	1	1	0	0	0	0	0	0	0	0
S3_452676	3	-	0	0	1	0	0	1	1	1	0	1	0	1	0	0	0	0	1	0	0	1	0	1	1	0	1	1	1	0	-	0	0	1	0	1	0	1	1	1	1	0	0	0	0	0	0	0	0
S3_481569	3	1	0	0	1	1	0	1	1	1	0	1	0	1	0	1	0	0	1	0	0	1	0	1	1	0	1	1	1	0	1	0	0	1	0	1	0	1	1	1	1	0	0	0	0	0	0	0	0
S3_494670	3	1	0	0	1	-	-	1	1	1	0	1	0	1	0	0	0	0	1	0	0	1	0	1	1	0	1	0	1	0	1	0	0	1	0	1	0	1	1	1	1	0	0	0	0	0	0	0	0
S3_499503	3	1	0	0	1	1	0	1	1	1	0	1	0	1	0	1	0	0	1	0	0	1	0	1	1	0	1	1	1	0	1	0	0	1	0	1	0	1	1	1	1	0	0	0	0	0	0	0	0
S3_564084	3	1	0	0	1	0	0	1	1	1	0	1	0	1	0	1	0	0	1	0	0	1	0	1	1	0	1	1	1	0	1	0	0	1	0	1	0	1	1	1	1	0	0	0	0	0	0	0	0
S3_601407	3	1	0	0	1	-	0	1	1	1	0	1	0	1	0	0	0	0	1	0	0	1	0	1	1	0	1	1	1	0	0	0	0	1	0	1	0	1	0	1	1	0	0	0	0	0	0	0	0
S3_607107	3	1	0	0	1	1	0	1	1	1	0	1	0	1	0	1	0	0	1	0	0	1	0	1	1	0	1	1	1	0	1	0	0	1	0	1	0	1	1	1	1	0	0	0	0	0	0	0	0
S3_611335	3	0	0	0	1	0	0	1	1	1	0	1	0	1	0	0	0	0	1	0	0	1	0	1	1	0	1	1	1	0	1	0	0	1	-	1	0	1	1	1	1	0	0	0	0	0	0	0	0
S3_628491	3	1	0	0	1	1	0	1	1	1	0	1	0	1	0	0	0	0	1	0	0	1	0	1	1	0	1	1	1	0	1	0	0	1	0	1	0	1	1	1	1	0	0	0	0	0	0	0	0
S3_705999	3	1	0	0	1	1	0	1	1	1	0	1	0	1	0	0	0	0	0	0	0	1	0	1	1	0	1	1	1	0	1	0	0	1	0	1	0	1	1	1	1	0	0	0	0	0	0	0	0
S3_706108	3	1	0	0	1	1	0	1	1	1	0	1	0	1	0	1	0	0	1	0	0	1	0	1	1	0	1	1	1	0	1	0	0	1	0	1	0	1	1	1	1	0	0	0	0	0	0	0	0
S3_710767	3	0	0	0	1	0	0	1	0	1	0	1	0	1	0	0	0	0	0	0	0	0	0	1	1	0	1	1	1	0	1	0	0	1	0	1	0	0	1	1	1	0	0	0	0	0	0	0	0
S3_712534	3	1	0	0	1	0	-	1	1	0	0	1	0	0	0	-	0	0	0	0	0	0	0	1	1	0	1	1	1	0	1	0	0	1	0	1	0	1	1	1	1	0	0	0	0	0	0	0	0
	3 Average	0.888889	0	0	1	0.4375	0	0.947368	0.947368	0.894737	0	1	0	0.947368	0	0.352941	0	0	0.684211	0	0	0.777778	0	1	1	0	0.947368	0.947368	0.947368	0	0.833333	0	0	1	0.0625	1	0	0.947368	0.947368	1	1	0	0	0	0	0	0	0	0
S5_98792	5	0	1	0	1	0	-	1	0	-	1	1	0	1	1	0	0	0	1	1	0	1	0	1	1	0	1	0	1	0	0	0	0	0	0	0	1	0	0	0	1	0	0	1	0	0	1	0	0
S5_166628	5	-	0	0	0	1	-	1	0	1	1	1	1	1	0	-	0	0	1	0	0	1	0	1	0	0	0	1	1	-	0	0	0	0	0	1	0	1	0	0	0	0	1	1	1	-	0	1	0
S5_200502	5	0	0	0	0	0	0	1	0	1	1	1	1	1	0	0	0	0	1	0	1	1	0	1	0	0	0	1	1	0	0	0	0	0	0	1	1	1	0	0	0	0	1	0	1	0	0	0	0
S5_226739	5	0	0	0	0	-	0	1	0	0	1	1	1	1	0	0	0	0	1	0	1	1	0	1	0	0	0	1	1	0	0	0	0	0	0	1	1	0	-	0	0	0	1	0	1	0	0	0	0
S5_286060	5	0	0	0	0	1	0	1	0	1	1	1	1	1	0	0	0	0	1	0	1	1	0	1	0	0	0	1	1	0	0	0	0	0	0	1	1	1	0	0	0	0	1	1	1	0	0	1	0
S5_287242	5	0	0	1	0	1	0	1	0	1	1	1	1	1	0	0	0	0	1	0	1	1	0	1	0	0	0	1	1	0	0	0	0	0	0	1	1	1	0	0	0	0	1	1	1	0	0	1	0
S5_335937	5	0	0	0	0	1	0	1	0	1	1	1	1	1	0	0	0	0	1	0	1	1	0	1	0	0	0	1	1	0	0	0	0	0	0	1	1	1	0	0	0	0	1	1	1	0	0	1	0
S5_336130	5	0	0	0	0	0	0	1	0	1	0	1	1	1	-	0	0	0	1	0	1	1	0	1	0	0	0	1	1	0	0	0	0	0	0	1	1	1	0	0	0	0	1	1	1	0	0	1	0
S5_339064	5	1	0	0	1	1	1	1	0	1	0	1	0	1	0	1	1	0	1	1	1	1	1	0	0	1	1	0	0	1	0	1	1	1	1	0	0	1	0	1	1	1	0	1	1	1	0	1	1
S5_344959	5	0	0	0	0	0	0	1	0	1	1	1	1	1	0	0	0	0	1	0	1	1	0	1	0	0	0	1	1	0	0	0	0	0	0	1	1	1	0	0	0	0	1	0	1	0	0	0	0
S5_462981	5	0	0	0	0	0	0	1	0	1	1	1	1	0	0	-	0	0	-	0	1	1	0	1	0	0	0	1	1	0	0	0	0	0	-	1	1	1	0	0	0	0	1	0	1	0	0	0	0
S5_470257	5	0	0	0	0	0	-	1	0	1	1	1	1	1	0	-	0	0	1	0	1	0	0	1	0	0	0	0	0	0	-	0	0	0	0	1	1	1	0	0	0	0	1	1	1	0	0	1	-
S5_470357	5	-	0	0	0	0	-	1	0	1	0	1	1	1	0	-	-	0	-	0	1	0	0	1	0	0	0	1	1	0	0	0	0	0	0	1	1	1	0	0	0	0	1	1	1	-	0	1	0
S5_635148	5	0	0	0	0	0	0	1	0	1	1	1	1	1	0	0	0	0	1	0	1	1	0	1	0	0	0	1	1	-	0	0	0	0	0	1	1	1	0	0	0	0	1	0	1	0	0	0	0
S5_651644	5	0	0	0	0	1	0	1	0	1	1	1	1	1	0	0	0	0	1	0	1	1	0	1	0	0	0	1	1	0	0	0	0	0	0	1	1	1	0	0	0	0	1	1	1	0	0	1	0
S5_671033	5	0	0	0	0	1	0	1	0	0	1	1	1	1	0	0	0	0	1	0	1	1	0	1	0	0	0	1	1	0	0	0	0	0	0	1	1	1	0	0	0	0	1	1	1	0	0	1	0
S5_704051	5	0	0	0	0	-	0	1	0	1	1	1	0	1	0	-	0	0	0	0	1	1	0	1	0	0	0	1	-	0	0	0	0	0	0	1	1	1	0	0	0	0	1	0	1	0	0	0	0
S5_724700	5	0	0	0	0	0	0	1	0	0	1	1	0	0	0	0	0	0	0	0	1	0	0	1	0	0	0	1	1	0	0	0	0	0	0	1	1	1	0	0	0	0	1	1	1	0	0	0	-
S5_729050	5	0	0	0	0	0	-	1	0	1	1	1	1	1	0	0	-	0	1	0	1	1	0	1	0	0	0	1	1	0	0	0	0	0	0	0	0	1	0	0	0	0	1	0	1	0	0	0	0
S5_757404	5	0	0	0	0	1	0	1	0	1	1	1	1	1	0	0	0	0	1	0	1	1	0	1	0	0	0	1	1	0	0	0	0	0	0	1	1	1	0	0	0	0	1	1	1	0	0	1	0
S5_758532	5	0	0	0	0	0	0	1	0	0	1	1	1	1	0	0	-	0	0	0	1	0	0	1	0	0	0	1	1	0	0	0	0	0	0	1	1	1	0	0	0	0	1	1	1	0	0	1	0
S5_760143	5	0	0	0	0	1	0	1	0	1	1	1	1	1	0	0	0	0	1	0	1	1	0	1	0	0	0	1	1	0	0	0	0	0	0	1	1	1	0	0	0	0	1	1	1	0	0	1	0
S5_761136	5	0	0	0	0	0	0	1	0	1	1	1	1	1	0	0	0	0	1	0	1	1	0	1	0	0	0	1	1	0	0	0	0	0	0	1	1	1	0	0	0	0	1	0	1	0	0	0	0
S5_763846	5	0	0	0	0	1	0	1	0	1	1	1	1	1	0	0	0	0	0	0	1	1	0	1	0	0	0	1	1	0	0	0	0	0	0	1	1	1	0	0	0	0	1	1	1	0	0	1	0
S5_798132	5	0	0	0	0	0	0	1	0	1	1	1	1	0	0	0	0	0	1	0	1	1	0	1	0	0	0	1	1	0	0	0	0	0	0	1	1	1	0	0	0	0	1	1	1	0	0	1	0
S5_804514	5	0	0	0	0	0	0	1	0	0	0	1	1	1	0	0	-	0	1	0	1	1	0	1	0	0	0	1	0	0	0	0	0	0	0	1	1	1	0	0	0	0	1	1	1	0	0	0	0
S5_821595	5	0	0	0	0	-	-	1	0	1	1	1	1	1	-	0	0	0	1	0	1	0	0	1	0	0	0	1	0	-	0	0	0	0	0	1	1	1	0	0	0	0	1	1	1	0	0	1	0
S5_848886	5	0	0	0	0	1	0	1	0	1	1	1	0	1	0	0	0	0	1	0	1	1	0	1	0	0	0	1	1	0	0	0	0	0	0	1	1	1	0	0	0	0	1	1	1	0	0	1	0
S5_849095	5	0	0	0	0	0	0	1	0	1	1	1	0	0	0	-	0	0	1	0	1	0	0	1	0	0	0	1	1	0	0	0	0	0	0	1	1	0	0	0	0	0	1	1	1	0	0	1	0
S5_869773	5	0	0	1	0	1	0	1	0	1	1	1	1	1	0	0	0	0	1	0	1	1	0	1	0	0	0	1	1	0	0	0	0	0	0	1	1	1	0	0	0	0	1	1	1	0	0	1	0
S5_895983	5	0	0	0	0	1	-	1	0	1	1	1	1	1	0	0	0	0	0	0	1	1	0	1	0	0	0	1	1	0	0	0	0	0	0	1	1	0	0	0	0	0	1	1	1	0	0	1	0
S5_958552	5	0	0	0	0	0	0	1	0	1	1	1	1	1	0	0	0	0	1	0	1	1	0	1	0	0	0	1	1	0	0	0	0	0	0	1	1	1	0	0	0	0	1	0	1	0	0	0	0
S5_969674	5	0	0	0	0	1	0	1	0	1	1	1	1	1	0	0	0	0	1	0	1	1	0	1	0	0	0	1	1	0	0	0	0	0	0	1	1	1	0	0	0	0	1	1	1	0	0	1	0
S5_1016079	5	0	0	0	0	1	0	1	0	1	1	1	1	1	0	0	0	0	1	0	1	1	0	1	0	0	0	1	1	0	0	0	0	0	0	1	1	1	0	0	0	0	1	1	1	0	0	1	0
S5_1017588	5	0	0	0	0	0	0	1	0	1	1	1	1	1	0	0	0	0	1	0	1	1	0	1	0	0	0	1	1	0	0	0	0	0	0	1	1	1	0	0	0	0	1	1	1	0	0	1	0
S5_1028306	5	0	0	0	0	-	-	1	0	0	0	1	1	0	0	0	0	0	0	0	1	1	0	1	0	0	0	1	0	-	0	0	0	0	0	1	1	1	0	0	0	0	1	1	1	0	0	1	0
S5_1034917	5	0	1	0	0	0	0	1	1	0	1	1	1	1	1	1	0	0	1	1	1	1	0	0	1	0	0	0	0	1	1	0	1	0	1	1	0	1	0	0	0	0	0	1	1	0	0	0	0
S5_1120217	5	0	0	0	0	0	-	1	0	1	0	1	0	1	0	-	-	0	1	0	1	1	0	1	0	0	0	1	1	0	-	0	0	0	0	0	1	1	0	0	0	0	1	1	1	0	0	1	0
S5_1122629	5	-	0	0	0	1	-	1	0	1	1	0	1	1	0	0	0	0	0	-	1	0	0	0	0	0	0	1	1	-	0	0	0	0	0	0	1	1	0	0	0	0	1	1	1	0	0	1	0
S5_1191642	5	0	0	0	0	0	0	1	0	1	1	1	1	1	0	-	0	0	1	0	1	0	0	1	0	0	0	1	1	0	0	0	0	0	0	1	1	1	0	0	0	0	1	0	1	0	0	0	0
S5_1224799	5	0	0	0	0	0	0	1	0	1	1	1	1	1	0	0	0	0	1	0	1	1	0	1	0	0	0	1	1	-	0	0	0	0	0	1	1	1	0	0	0	0	1	1	1	0	0	0	0
S5_1256812	5	0	0	0	0	1	0	1	0	0	1	1	1	1	0	0	0	0	1	0	1	1	0	1	0	0	0	1	1	0	0	0	0	0	0	1	1	1	0	0	0	0	1	1	1	0	0	1	0
S5_1318180	5	0	0	0	0	0	0	1	0	1	1	1	1	1	0	0	0	0	1	0	1	1	0	1	0	0	0	1	1	0	0	0	0	0	0	1	1	0	0	0	0	0	1	1	1	0	0	1	0
S5_1359288	5	0	0	0	0	1	0	1	0	1	1	1	1	1	0	0	0	0	0	0	1	1	0	1	0	0	0	0	1	0	0	0	0	0	0	1	1	0	0	0	0	0	1	1	1	0	0	1	0
S5_1362277	5	0	0	0	0	-	0	1	0	1	1	1	1	1	-	0	0	0	-	0	1	1	0	1	0	0	0	1	1	0	0	0	0	0	0	1	1	0	0	0	0	0	1	0	1	0	0	0	0
S5_1437413	5	0	0	0	0	-	0	1	0	1	0	1	1	0	0	-	0	0	0	0	1	1	0	1	0	0	0	1	1	-	-	0	0	0	0	1	1	0	0	0	0	0	1	0	1	0	0	1	0
S5_1438500	5	0	0	0	0	0	0	1	0	1	1	1	1	1	0	0	0	0	1	0	1	1	0	1	0	0	0	1	1	0	0	0	0	0	0	1	1	0	0	0	0	0	1	0	1	0	0	0	0
S5_1440417	5	0	0	0	0	1	0	1	0	1	1	1	1	1	0	0	0	0	1	0	1	1	0	1	0	0	0	1	1	0	0	0	0	0	0	1	1	0	0	0	0	0	1	1	1	0	0	1	0
S5_1447745	5	0	0	0	0	0	0	1	0	1	0	1	1	1	0	0	0	0	1	0	1	1	0	1	0	0	0	1	1	0	0	0	0	0	0	1	1	0	0	0	0	0	1	1	1	0	0	1	0
S5_1453102	5	0	0	0	0	1	0	1	0	1	1	1	1	1	0	0	0	0	1	0	1	1	0	1	0	0	0	1	1	0	0	0	0	0	0	1	1	0	0	0	0	0	1	1	1	0	0	1	0
S5_1556798	5	0	0	-	0	1	0	1	0	0	0	1	0	1	0	0	0	0	1	0	1	0	0	1	0	0	0	0	1	0	0	0	0	0	0	1	0	0	0	0	0	0	1	1	1	-	0	1	0
S5_1562111	5	0	0	0	0	-	-	1	0	1	1	1	1	1	0	0	0	0	0	0	1	1	0	1	0	0	0	1	1	0	0	0	0	0	0	1	1	0	0	0	0	0	1	1	1	0	0	1	0
S5_1565473	5	-	0	0	0	0	0	1	0	1	1	1	1	1	0	-	0	0	0	0	1	1	0	1	0	0	0	0	1	0	0	0	0	0	0	1	1	0	0	0	0	0	1	0	1	0	0	0	0
S5_1598749	5	0	0	0	0	0	0	1	0	1	1	1	1	1	0	-	0	0	1	0	1	1	0	1	0	0	0	1	1	0	0	0	0	0	0	1	1	0	-	0	0	0	1	1	1	0	0	1	0
S5_1687115	5	0	0	0	0	1	0	1	0	1	-	1	1	1	0	0	0	0	0	0	1	1	0	1	0	0	0	1	1	0	0	0	0	0	0	0	1	0	0	0	0	0	1	1	1	0	0	1	0
S5_1718816	5	0	0	0	0	1	-	1	0	1	1	1	1	0	0	0	0	0	1	0	1	0	0	1	0	0	0	1	-	0	0	0	0	0	0	0	1	0	0	0	0	0	1	1	0	0	0	0	0
S5_1748828	5	0	0	0	0	-	0	1	0	1	1	1	1	1	0	-	0	0	0	0	1	1	0	1	0	0	0	1	1	0	0	0	0	0	0	0	1	0	0	0	0	0	1	1	1	0	0	1	0
S5_1813805	5	0	0	0	0	1	0	1	0	1	1	1	1	1	0	0	0	0	1	0	1	1	0	1	0	0	0	1	1	0	0	0	0	0	0	0	1	0	0	0	0	0	1	1	1	0	0	1	0
S5_1894697	5	0	0	1	0	0	0	1	0	1	1	1	0	1	0	-	0	0	1	0	1	1	0	1	0	0	0	1	1	0	0	0	0	0	0	0	1	0	0	0	0	0	1	0	1	0	0	1	0
S5_1899626	5	-	0	0	0	-	0	1	0	1	0	1	1	1	0	0	0	0	1	0	1	1	0	1	0	0	0	1	0	0	0	0	0	0	0	0	1	0	0	0	0	0	0	0	1	0	0	1	0
S5_1920862	5	0	0	0	0	0	0	1	0	1	1	1	1	1	0	0	0	0	1	0	1	1	0	1	0	0	0	1	1	0	0	0	0	0	0	0	1	0	0	0	0	0	1	1	1	0	0	1	0
S5_1991593	5	0	0	0	0	0	0	1	0	1	1	1	1	1	0	0	0	0	1	0	1	1	0	1	0	0	0	0	1	-	0	0	0	0	0	0	1	0	0	0	0	0	1	1	1	0	0	1	0
S5_2016461	5	0	0	0	0	-	0	1	0	0	1	1	0	1	0	0	0	0	1	0	1	1	0	1	0	0	0	1	1	0	0	0	0	0	0	0	1	0	0	0	0	0	1	1	1	0	0	1	0
S5_2025659	5	0	0	0	0	0	0	1	0	1	1	1	1	1	0	0	0	0	0	0	1	1	0	1	0	0	0	1	1	0	0	0	0	0	0	0	1	0	0	0	0	0	1	0	1	0	0	0	0
S5_2025796	5	0	0	0	0	0	0	1	0	1	1	1	1	1	0	0	0	0	0	0	1	1	0	1	0	0	0	1	1	0	0	0	0	0	0	0	1	0	0	0	0	0	1	0	1	0	0	0	0
S5_2032809	5	0	0	0	0	1	0	1	0	1	1	1	1	1	0	0	0	0	1	0	1	1	0	1	0	0	0	1	1	0	0	0	0	0	0	0	1	0	0	0	0	0	1	1	1	0	0	1	0
S5_2125056	5	0	0	0	0	0	0	1	0	1	1	1	1	1	0	0	0	0	0	0	1	0	0	1	0	0	0	1	1	0	0	0	0	0	0	0	1	0	0	0	0	0	1	0	1	0	0	0	0
S5_2125211	5	0	0	0	0	0	0	1	0	1	0	1	1	0	0	-	0	0	1	0	1	1	0	0	0	0	0	0	1	0	0	0	-	0	0	0	1	0	0	0	0	0	0	1	1	0	0	1	0
S5_2127569	5	0	0	0	0	1	0	1	0	1	1	1	1	0	0	0	0	0	0	0	1	1	0	1	0	0	0	1	1	0	0	0	0	0	0	0	1	0	0	0	0	0	1	1	1	0	0	1	0
S5_2128962	5	0	0	0	0	1	0	1	0	1	1	1	1	1	0	0	0	0	0	0	1	1	0	1	0	0	0	1	1	0	0	0	0	0	0	0	1	0	0	0	0	0	1	1	1	0	0	1	0
S5_2159503	5	0	0	0	0	-	0	1	0	1	1	1	1	1	0	0	0	0	0	0	1	1	0	1	0	0	0	1	1	0	0	0	0	0	0	0	1	0	0	0	0	0	0	1	1	0	0	0	0
S5_2163863	5	0	0	1	0	-	0	1	0	1	1	1	0	1	0	0	0	0	1	0	1	1	0	1	0	0	0	1	1	0	0	0	0	0	0	0	1	0	0	0	0	0	1	1	1	0	0	1	0
S5_2180318	5	0	0	0	0	0	0	1	0	1	1	1	1	1	0	0	0	0	1	0	1	-	0	1	0	0	0	1	1	0	0	0	0	0	0	0	1	0	0	0	0	0	0	1	1	0	0	1	0
S5_2201250	5	0	0	0	0	0	0	0	0	1	0	0	0	1	0	-	0	0	0	0	1	0	0	1	0	0	0	1	1	0	0	0	0	0	0	0	1	0	0	0	0	0	1	1	1	0	0	1	0
S5_2216816	5	0	0	0	0	1	0	1	0	1	1	1	1	1	0	0	0	0	1	0	1	1	0	1	0	0	0	1	1	0	0	0	0	0	0	0	1	0	0	0	0	0	1	1	1	0	0	1	0
S5_2219567	5	0	0	0	0	0	0	1	0	1	1	1	1	1	0	0	0	0	0	0	1	1	0	1	0	0	0	0	1	0	0	0	0	0	0	0	1	0	0	0	0	0	1	1	1	0	0	1	0
S5_2248627	5	0	0	0	0	1	0	1	0	1	1	1	1	1	0	0	1	0	1	0	1	1	0	1	0	0	0	1	1	0	0	0	0	0	0	0	1	0	0	0	0	0	1	0	1	0	0	1	0
S5_2262588	5	0	0	0	0	-	0	1	0	1	0	1	1	1	0	-	0	0	1	0	1	1	0	1	0	0	0	1	1	0	0	0	0	0	0	0	1	0	0	0	0	0	1	1	1	0	0	0	0
S5_2298961	5	0	0	0	0	-	0	1	0	0	1	1	0	1	0	0	1	0	1	0	1	1	0	1	0	0	0	1	1	0	0	0	0	0	0	0	0	0	0	0	0	0	0	1	1	0	0	1	0
S5_2300122	5	0	0	0	0	1	0	1	0	1	1	1	1	1	0	0	1	0	1	0	1	1	0	1	0	0	0	1	1	0	0	0	0	0	0	0	1	0	0	0	0	0	1	1	1	0	0	1	0
S5_2314249	5	0	0	0	0	1	0	1	0	1	1	1	1	1	0	0	1	0	1	0	1	1	0	1	0	0	0	1	1	0	0	0	0	0	0	0	1	0	0	0	0	0	1	1	1	0	0	1	0
S5_2323537	5	0	0	1	0	-	0	1	0	1	1	1	1	1	0	0	1	0	1	0	1	1	0	1	0	0	0	1	1	0	0	0	0	0	-	0	1	0	0	0	0	0	1	1	1	0	0	1	0
S5_2357783	5	-	0	0	0	1	0	1	0	1	1	1	1	1	0	-	1	0	1	0	0	1	0	0	0	0	0	0	1	0	0	0	-	-	0	0	0	0	0	0	0	0	1	0	1	0	0	1	0
S5_2377878	5	0	0	0	0	0	0	1	0	1	1	1	1	1	0	0	1	0	0	0	1	1	0	1	0	0	0	1	1	0	0	0	0	0	0	0	1	0	0	0	0	0	1	0	1	0	0	0	0
S5_2420152	5	0	0	0	0	0	0	1	0	1	0	1	1	1	0	-	1	0	1	0	1	1	0	1	0	0	0	1	0	-	-	0	0	0	0	0	1	0	0	0	0	0	0	1	1	0	0	0	0
S5_2430018	5	0	0	0	0	0	0	1	0	1	1	1	1	1	0	0	1	0	0	0	1	1	0	1	0	0	0	1	1	0	0	0	0	0	0	0	1	0	0	0	0	0	1	0	1	0	0	0	0
S5_2453936	5	0	0	0	0	1	0	1	0	1	1	1	1	1	0	0	1	0	1	0	1	1	0	1	0	0	0	1	1	0	0	0	0	0	0	0	1	0	0	0	0	0	1	1	1	0	0	1	0
S5_2475230	5	0	0	0	0	0	0	1	0	1	1	1	1	1	0	0	1	0	1	0	1	1	0	1	0	0	0	1	1	0	0	0	0	0	0	0	1	0	0	0	0	0	1	1	1	0	0	1	0
S5_2511185	5	0	0	0	0	1	0	1	0	1	0	1	1	1	0	-	1	0	-	0	1	1	0	1	0	0	0	-	1	-	0	0	0	0	0	0	1	0	0	0	0	0	1	0	1	0	0	1	0
S5_2511287	5	0	0	0	0	0	0	1	0	1	1	1	0	1	0	0	0	0	0	0	1	1	0	1	0	0	0	1	1	0	0	0	-	0	0	0	1	0	0	0	0	-	1	1	1	0	0	1	0
S5_2519154	5	0	0	0	0	1	0	1	0	1	1	1	1	1	0	0	1	0	1	0	1	1	0	1	0	0	0	1	1	0	0	0	0	0	0	0	1	0	0	0	0	0	1	1	1	0	0	1	0
S5_2522183	5	0	0	0	0	1	0	1	0	1	1	1	1	1	0	0	1	0	1	0	1	1	0	1	0	0	0	1	1	0	0	0	0	0	0	0	1	0	0	0	0	0	1	1	1	0	0	1	0
S5_2524124	5	0	0	0	0	0	0	1	0	1	1	1	1	1	0	0	1	0	0	0	1	1	0	1	0	0	0	1	1	0	0	0	0	0	0	0	1	0	0	0	0	0	1	0	1	0	0	0	0
S5_2577501	5	0	0	0	0	0	0	1	0	1	0	1	1	1	0	0	0	0	0	0	1	1	0	1	0	0	0	1	1	0	0	0	0	0	0	0	1	0	0	0	0	0	1	0	1	0	0	0	0
S5_2583538	5	0	0	0	0	1	0	1	0	0	1	1	1	1	0	0	1	0	0	0	1	1	0	1	0	0	0	0	0	0	0	0	-	0	0	0	0	0	0	0	0	0	0	1	1	0	0	1	0
S5_2606316	5	0	0	0	0	0	0	1	0	1	1	0	1	1	0	0	1	0	1	0	1	1	0	1	0	0	0	1	1	0	0	0	0	0	0	0	1	0	0	0	0	0	1	1	1	0	0	1	0
S5_2611697	5	0	0	0	0	0	0	1	0	1	1	1	1	1	0	0	1	0	0	0	1	0	0	1	0	0	0	1	1	0	0	0	0	0	0	0	1	0	0	0	0	0	1	0	1	0	0	0	0
S5_2649690	5	0	0	0	0	1	0	1	0	1	1	1	1	1	0	0	1	0	1	0	1	1	0	1	0	0	0	1	1	0	0	0	0	0	0	0	1	0	0	0	0	0	1	1	1	0	0	1	0
S5_2663159	5	0	0	0	0	0	0	1	0	1	1	1	1	1	0	0	1	0	1	0	1	1	0	1	0	0	0	1	1	0	0	0	0	0	0	0	1	0	0	0	0	0	1	1	1	0	0	1	0
S5_2667741	5	0	0	0	0	0	0	1	0	1	1	1	0	1	0	0	1	0	1	0	1	1	0	1	0	0	0	1	1	0	0	0	0	0	0	0	1	0	0	0	0	0	1	1	1	0	0	1	0
S5_2667879	5	0	0	0	0	-	0	1	0	1	1	1	1	1	0	-	1	0	0	0	1	0	0	1	0	0	0	1	1	0	0	0	0	0	0	0	1	0	0	0	0	0	1	1	1	0	0	-	0
S5_2668000	5	0	0	0	0	0	0	1	0	1	1	1	1	1	0	0	1	0	0	0	1	0	0	1	0	0	0	1	1	0	0	0	0	0	0	0	1	0	0	0	0	0	1	0	1	0	0	0	0
S5_2669374	5	0	0	0	0	-	0	1	-	0	1	1	1	1	0	-	1	0	1	0	0	0	0	1	0	0	-	0	1	0	0	0	-	0	-	0	1	0	0	0	-	-	1	1	1	-	0	1	0
S5_2699074	5	0	0	0	0	1	0	1	0	0	1	1	1	1	0	0	1	0	1	0	1	1	0	1	0	0	0	1	1	0	0	0	0	0	0	0	1	0	0	0	0	0	1	1	1	0	0	1	0
	5 Average	0.0102041	0.0192308	0.0485437	0.0192308	0.448276	0.0108696	0.990385	0.00970874	0.864078	0.84466	0.971154	0.855769	0.913462	0.019802	0.0240964	0.262626	0	0.7	0.0291262	0.961538	0.84466	0.00961538	0.951923	0.0192308	0.00961538	0.0194175	0.873786	0.911765	0.0212766	0.01	0.00961538	0.020202	0.00970874	0.019802	0.471154	0.923077	0.365385	0	0.00961538	0.0194175	0.00980392	0.903846	0.730769	0.980769	0.01	0.00961538	0.699029	0.00980392
S7_124258	7	0	0	0	0	0	-	1	0	0	1	1	0	0	0	0	0	1	0	1	0	0	0	1	1	0	1	0	1	0	0	0	1	1	1	1	0	1	1	0	1	0	1	1	0	0	0	0	0
S7_237047	7	0	0	0	0	0	0	1	0	1	1	1	0	0	0	-	0	1	0	1	0	1	0	1	1	0	1	1	1	0	0	0	1	1	1	1	1	1	1	0	1	0	1	1	0	0	0	0	0
S7_358250	7	0	0	0	0	0	0	1	0	1	1	1	0	0	0	1	0	1	0	1	0	1	0	1	1	0	1	1	1	0	0	0	0	1	1	1	1	1	0	0	1	0	1	1	0	0	0	0	0
S7_370657	7	0	0	0	0	0	0	1	0	1	0	1	0	0	0	-	0	1	0	1	0	0	0	1	1	0	1	1	1	0	0	0	1	1	1	1	1	1	0	0	1	0	0	1	0	0	0	0	0
S7_446093	7	0	0	0	0	1	0	1	0	1	1	1	0	0	0	1	0	1	0	1	0	1	0	1	1	0	1	1	1	0	0	0	1	1	1	1	1	1	1	0	1	0	1	1	0	0	0	0	0
S7_446449	7	0	0	0	0	0	0	1	0	1	1	1	0	0	0	0	0	1	0	1	0	0	0	1	1	0	1	1	1	0	0	0	1	1	1	0	1	1	1	0	1	0	1	1	0	0	0	0	0
	7 Average	0	0	0	0	0.166667	0	1	0	0.833333	0.833333	1	0	0	0	0.5	0	1	0	1	0	0.5	0	1	1	0	1	0.833333	1	0	0	0	0.833333	1	1	0.833333	0.833333	1	0.666667	0	1	0	0.833333	1	0	0	0	0	0
S8_79981	8	1	0	0	1	1	0	1	0	1	0	1	0	1	0	1	1	0	1	1	1	0	1	0	0	1	1	0	0	1	0	1	0	0	1	0	0	1	0	1	1	1	0	0	1	1	0	1	1
S8_85511	8	1	0	0	1	1	1	1	0	1	0	1	0	1	0	1	1	0	1	1	1	1	1	0	0	1	1	0	0	1	0	1	0	0	1	0	0	1	0	1	1	1	0	0	1	1	0	1	1
S8_112887	8	0	0	0	1	1	1	1	0	1	0	1	0	1	0	1	1	0	1	1	1	1	1	0	0	1	1	0	0	1	0	1	0	0	1	0	0	0	0	1	1	1	0	0	1	1	0	1	1
S8_175741	8	1	0	0	1	0	0	1	0	0	0	1	0	1	0	0	0	0	1	0	1	0	1	0	0	0	1	0	0	1	0	1	0	0	1	0	0	1	0	1	1	1	0	0	1	1	0	1	1
S8_176793	8	1	0	0	1	1	1	1	0	1	0	1	0	1	0	0	1	0	1	1	1	0	1	0	0	1	1	0	0	1	0	1	0	0	1	0	0	1	0	1	1	1	0	0	1	1	0	1	1
S8_182083	8	0	0	0	1	-	0	-	0	0	0	1	0	1	0	-	1	0	1	1	1	0	0	0	0	1	0	0	0	0	0	1	0	0	-	0	0	1	0	1	0	1	0	0	1	1	0	1	1
S8_182232	8	0	0	-	1	0	-	1	0	1	0	0	0	1	0	-	0	-	-	0	1	1	1	0	0	1	1	-	0	0	0	1	0	0	-	-	0	1	0	1	1	1	0	0	1	1	0	1	1
S8_193728	8	0	0	0	1	0	1	1	0	1	0	0	0	1	0	0	1	0	0	1	1	1	1	0	0	1	0	0	0	1	0	0	0	0	0	0	0	1	0	0	1	1	0	0	1	1	0	0	1
S8_220227	8	1	0	0	1	1	0	1	0	1	0	1	0	1	0	-	1	0	1	1	1	0	1	0	0	1	1	0	0	1	0	1	0	0	1	0	0	0	0	1	1	1	0	0	1	1	0	1	1
S8_220359	8	1	0	0	1	0	-	1	0	1	0	1	0	1	0	-	1	0	1	1	1	0	1	0	0	1	1	0	0	1	0	1	0	0	0	0	0	1	0	0	1	0	0	0	1	1	0	1	1
S8_242787	8	0	1	0	0	0	0	1	1	0	1	1	1	1	1	1	0	0	1	1	1	1	0	0	1	1	1	0	0	1	1	1	1	0	1	1	0	1	0	0	0	0	0	1	1	0	0	0	0
S8_257079	8	1	0	0	1	1	1	1	0	1	0	1	0	1	0	0	1	0	1	1	1	1	1	0	0	1	1	0	0	1	0	1	0	0	1	0	0	1	0	1	1	1	0	0	1	1	0	1	1
S8_302121	8	1	0	0	1	1	1	1	0	1	0	1	0	1	0	1	1	0	1	1	1	0	1	0	0	1	1	0	0	1	0	1	0	0	1	0	0	1	0	1	1	1	0	0	1	1	0	1	1
S8_304001	8	0	0	0	0	0	0	1	0	1	-	1	-	0	0	0	1	0	1	1	1	0	1	0	0	1	1	0	0	0	0	1	0	0	0	0	0	1	0	1	1	-	0	0	1	1	1	1	1
S8_316525	8	0	0	0	1	0	1	1	0	1	0	1	-	1	0	0	1	0	1	0	1	0	1	0	0	1	1	0	0	1	0	1	0	0	1	0	0	1	0	1	1	1	0	0	1	1	0	1	1
S8_316673	8	0	0	0	1	0	0	1	0	1	0	1	0	1	0	0	1	0	1	1	1	1	1	0	0	1	1	0	0	1	0	1	0	0	1	0	0	1	0	1	1	1	0	0	1	0	0	0	0
S8_389134	8	1	0	0	1	1	1	1	0	1	0	0	0	1	0	1	1	0	1	1	1	1	0	0	0	1	1	0	0	1	0	1	0	0	0	0	0	1	0	1	1	1	0	0	1	1	0	1	1
S8_409121	8	1	0	0	1	1	0	1	0	1	0	1	0	1	0	0	1	0	1	1	1	0	1	0	0	1	1	0	0	1	0	1	0	0	1	0	0	1	0	1	1	1	0	0	1	0	0	1	1
S8_409293	8	0	0	0	1	0	1	1	0	1	0	0	0	1	0	0	1	0	0	1	1	0	1	0	0	1	0	0	0	1	0	0	0	0	1	0	0	1	0	0	1	1	0	0	1	1	0	0	1
S8_411579	8	1	0	0	1	1	1	1	0	1	0	1	0	1	0	1	0	0	1	1	1	0	1	0	0	1	1	0	0	0	0	1	0	0	1	0	0	1	0	1	1	1	0	0	1	0	0	1	1
S8_436290	8	1	0	0	1	1	0	1	0	1	0	1	0	1	0	0	1	0	1	1	1	0	1	0	0	1	1	0	0	1	0	1	0	0	0	0	0	1	0	1	1	0	0	0	1	1	0	1	1
S8_466495	8	1	0	0	1	1	1	1	0	0	0	1	0	1	0	0	1	0	0	1	1	1	1	0	0	1	1	0	0	1	0	1	0	0	1	0	0	1	0	1	1	1	0	0	1	0	0	1	1
S8_489751	8	0	0	0	1	0	1	0	0	1	0	0	0	1	0	0	1	-	0	1	1	0	1	0	0	1	0	0	0	-	0	1	0	0	1	0	0	1	0	0	1	1	0	0	1	1	0	0	1
S8_489939	8	0	0	0	1	0	0	1	0	1	0	1	0	0	0	0	1	0	1	1	1	1	1	0	0	1	1	0	0	1	0	1	0	0	1	0	0	1	0	1	1	1	0	0	1	1	0	1	1
S8_497868	8	1	0	0	1	1	1	1	0	1	0	1	0	0	0	-	1	0	1	1	1	0	0	0	0	1	1	0	0	1	0	1	0	0	1	0	0	1	0	1	1	1	0	0	1	0	0	1	1
S8_559984	8	0	0	0	1	0	0	1	0	1	0	1	0	0	0	-	0	0	1	0	1	0	1	0	0	0	0	0	0	1	0	1	0	0	1	0	0	0	0	1	1	0	0	0	1	1	0	0	1
S8_560094	8	0	0	0	1	0	0	1	0	1	0	1	0	1	0	0	1	0	1	1	1	0	1	0	0	1	1	0	0	0	0	1	0	0	1	0	0	1	0	1	1	1	0	0	1	1	0	1	1
S8_560229	8	0	0	0	1	-	-	1	-	0	-	0	-	-	0	0	0	0	0	0	1	-	1	0	0	1	1	0	-	0	0	1	0	-	1	0	0	1	0	1	1	1	0	0	1	0	0	1	1
S8_585638	8	1	0	0	1	0	0	0	0	1	0	1	0	1	0	0	1	0	0	1	1	0	1	0	0	1	1	0	0	1	0	1	0	0	1	0	0	1	0	1	1	1	0	0	1	0	0	1	1
S8_590734	8	0	0	0	1	0	-	1	0	0	0	1	-	0	0	-	-	0	1	1	0	1	1	0	0	1	1	0	0	0	0	1	0	0	0	0	0	1	0	1	0	0	0	0	1	-	0	0	1
S8_689283	8	0	0	0	1	1	0	1	0	1	0	1	0	1	0	1	1	0	1	1	1	0	1	0	0	1	0	0	0	1	0	1	0	0	0	0	0	1	0	1	1	1	0	0	1	1	0	1	1
S8_764575	8	0	0	0	1	0	0	1	0	0	0	1	0	1	0	0	0	0	1	1	1	0	1	0	0	1	1	0	0	1	0	1	0	0	1	0	0	1	0	1	0	0	0	0	1	-	0	1	1
S8_962107	8	0	0	0	1	0	1	1	0	1	0	1	0	1	0	0	1	0	0	1	1	1	1	0	0	1	1	0	0	1	0	0	0	1	1	0	0	1	0	0	1	1	0	0	1	1	0	0	1
S8_964306	8	0	0	0	1	0	1	1	0	1	0	1	0	1	0	0	1	0	0	1	1	0	1	0	0	1	1	0	0	1	0	0	0	1	1	0	0	1	0	0	1	1	0	0	1	1	0	0	1
S8_971308	8	0	0	0	1	-	0	-	0	1	0	1	0	1	0	0	1	0	1	1	1	0	1	0	0	1	0	0	0	-	0	1	0	0	0	0	0	1	0	1	1	0	0	0	1	0	0	1	1
S8_973832	8	0	0	0	1	0	1	1	0	1	0	1	0	1	0	0	0	0	0	0	1	0	1	0	0	1	1	0	0	1	-	0	0	1	0	0	0	1	-	0	1	1	0	0	1	0	0	0	1
S8_974914	8	1	0	0	1	-	1	1	0	-	0	1	0	0	0	-	0	0	0	1	1	1	1	0	0	1	1	0	0	1	1	1	0	1	0	0	0	1	0	1	1	1	0	0	1	1	0	1	1
S8_1045731	8	0	0	0	1	0	0	1	0	1	0	1	0	1	0	0	1	0	0	1	1	0	1	0	0	1	1	0	0	1	0	0	0	1	1	0	0	1	0	0	1	0	0	0	1	1	0	0	1
S8_1050163	8	0	0	0	1	0	0	1	0	1	0	1	0	1	0	1	1	0	1	1	1	0	1	0	0	1	1	0	0	0	0	1	0	1	1	0	0	1	0	1	1	1	0	0	1	1	0	0	1
S8_1066679	8	0	1	0	0	1	0	1	1	0	0	0	0	1	1	0	0	0	-	1	0	1	0	0	0	0	0	1	0	0	1	1	0	1	0	0	0	1	1	0	0	0	0	0	0	1	0	0	0
	8 Average	0.4	0.05	0	0.925	0.416667	0.472222	0.947368	0.0512821	0.794872	0.0263158	0.825	0.0277778	0.846154	0.05	0.28125	0.74359	0	0.710526	0.85	0.95	0.358974	0.875	0	0.025	0.925	0.8	0.025641	0	0.763158	0.0769231	0.85	0.025	0.179487	0.710526	0.025641	0	0.925	0.025641	0.75	0.875	0.769231	0	0.025	0.975	0.736842	0.025	0.675	0.925
S11_3069	11	0	0	0	1	1	0	1	0	1	1	0	0	1	1	1	0	1	0	0	1	0	0	1	1	0	1	1	1	0	0	0	1	0	0	1	0	1	1	0	1	0	0	1	1	0	0	0	0
S11_4657	11	0	0	0	1	1	0	1	0	1	1	0	0	1	1	0	0	1	0	0	1	0	0	1	1	0	1	1	1	0	0	0	1	0	0	1	0	1	1	0	1	0	0	1	1	0	0	0	0
S11_8680	11	0	0	0	1	1	0	1	0	1	1	0	0	1	1	1	0	1	0	0	1	0	0	1	1	0	1	1	1	0	0	0	1	0	0	1	0	1	1	0	1	0	0	1	1	0	0	0	0
S11_12673	11	0	0	0	1	1	0	1	0	1	1	0	0	1	1	1	0	1	0	0	1	0	0	1	1	0	1	1	1	0	0	0	1	0	0	1	0	1	1	0	1	0	0	1	1	0	0	0	0
S11_16940	11	0	0	0	1	1	-	1	0	1	1	0	0	0	1	1	0	1	0	0	1	0	0	1	1	0	1	1	1	0	0	0	1	0	0	1	0	1	1	0	1	0	0	1	1	-	0	0	0
S11_43043	11	0	0	0	1	0	0	1	0	1	1	0	0	1	1	-	0	1	0	0	1	0	0	1	1	0	1	1	1	0	0	0	1	0	0	1	0	1	1	0	1	0	0	1	1	0	0	0	0
S11_43677	11	0	0	0	1	1	0	1	0	1	1	0	0	1	1	0	0	1	0	0	1	0	0	1	1	0	1	1	1	0	0	0	0	0	0	1	0	1	0	0	1	0	0	1	1	0	0	0	0
S11_43879	11	0	0	0	1	0	-	1	0	1	1	0	0	1	1	-	0	1	0	0	1	0	0	1	1	0	1	1	1	0	0	0	0	0	-	1	0	1	1	0	1	0	0	1	1	0	0	0	0
S11_50479	11	0	0	0	1	1	0	1	0	1	1	0	0	1	1	1	0	1	0	0	1	0	0	1	1	0	1	1	1	0	0	0	1	0	0	1	0	1	1	0	1	0	0	1	1	0	0	0	0
S11_97684	11	0	0	0	0	0	0	1	0	1	1	0	0	1	1	0	0	1	0	0	1	0	0	1	1	0	1	1	1	0	0	0	1	0	0	1	0	1	1	0	1	0	0	1	1	0	0	0	0
S11_120679	11	0	0	0	0	0	0	1	0	1	1	0	0	1	1	0	0	1	0	0	1	0	0	1	1	0	1	1	1	0	0	0	1	0	0	1	0	1	1	0	1	0	0	1	1	0	0	0	0
S11_123774	11	0	0	0	1	-	-	1	0	0	1	0	0	0	1	-	0	1	0	0	1	0	0	1	1	0	1	1	1	-	0	0	0	0	0	1	0	1	1	0	1	0	0	1	1	0	0	0	0
S11_123902	11	0	0	0	1	1	0	1	0	1	1	0	0	1	1	1	0	1	0	0	1	0	0	1	1	0	1	1	1	0	0	0	1	0	0	1	0	1	1	0	1	0	0	1	1	0	0	0	0
S11_184171	11	0	0	0	1	1	0	1	0	1	1	0	0	1	1	1	0	1	0	0	1	0	0	1	1	0	1	1	1	0	0	0	1	0	0	1	0	1	1	0	1	0	0	1	1	0	0	0	0
S11_184275	11	-	0	0	1	0	-	1	0	1	1	0	0	1	1	0	0	0	-	0	1	0	0	1	1	0	1	1	1	0	0	0	1	0	0	1	0	1	1	0	1	0	0	1	1	0	0	0	0
S11_291397	11	0	0	0	1	0	0	1	0	1	1	0	0	1	1	1	0	1	0	0	1	0	0	1	1	0	1	1	1	0	0	0	1	0	1	1	0	1	1	0	1	0	0	1	1	0	0	0	0
S11_291962	11	0	0	0	1	1	0	1	0	1	1	0	0	1	1	1	0	1	0	0	1	0	0	1	1	0	1	1	1	0	0	0	1	0	1	1	0	1	1	0	1	0	0	1	1	0	0	0	0
S11_312873	11	0	0	0	1	0	0	1	0	1	1	0	0	1	1	1	0	1	0	0	1	0	0	1	1	0	1	1	1	0	0	0	1	0	1	1	0	1	1	0	1	0	0	1	1	0	0	0	0
S11_358438	11	0	0	0	0	0	0	1	0	1	1	1	1	1	-	-	0	0	1	0	1	0	0	1	0	0	0	1	1	0	0	0	0	0	0	1	1	1	0	0	0	0	1	1	1	0	0	1	0
S11_376554	11	0	0	0	1	0	0	1	0	1	1	0	0	1	1	1	0	1	0	0	1	0	0	1	1	0	1	0	1	0	0	0	0	0	1	1	0	1	1	0	1	0	0	1	1	0	0	0	0
S11_389679	11	0	0	0	1	1	0	1	0	1	1	0	0	1	1	1	0	0	0	0	1	0	0	1	1	0	1	1	1	0	0	0	1	0	1	1	0	1	1	0	1	0	0	1	1	0	0	0	0
S11_403243	11	0	0	0	1	-	0	1	0	1	1	0	0	1	1	0	0	1	0	0	1	0	0	1	1	0	1	0	1	0	0	0	1	0	1	1	0	1	0	0	1	0	0	1	1	0	0	0	0
S11_403365	11	0	0	0	1	-	0	1	0	1	1	0	0	0	1	-	0	0	0	0	1	0	0	1	1	0	1	1	1	0	0	0	1	0	1	1	0	1	0	0	1	0	0	1	1	0	0	0	0
S11_412939	11	0	0	0	1	1	0	1	0	1	1	0	0	1	1	1	0	1	0	0	1	0	0	1	1	0	1	0	1	0	0	0	1	0	0	1	0	1	1	0	1	0	0	1	1	0	0	0	0
S11_515370	11	0	0	0	1	1	0	1	0	1	1	0	0	1	1	0	0	1	0	0	1	0	0	1	1	0	1	1	1	0	0	0	1	0	1	1	0	1	1	0	1	0	0	1	1	0	0	0	0
S11_515477	11	0	0	0	1	0	0	1	0	1	1	0	0	1	1	1	0	1	0	0	1	0	0	1	1	0	1	1	1	0	0	0	1	0	1	1	0	1	1	0	1	0	0	1	1	0	0	0	0
S11_516306	11	0	0	-	1	1	0	1	0	1	0	0	0	1	1	1	0	1	0	0	1	0	0	1	1	0	1	1	1	0	0	0	1	0	1	1	0	1	1	0	1	0	0	1	1	0	0	0	0
S11_630142	11	0	0	0	1	1	0	1	0	1	1	0	0	1	1	0	0	1	0	0	1	0	0	1	1	0	1	1	1	0	0	0	1	0	1	1	0	1	1	0	1	0	0	1	1	0	0	0	0
S11_637734	11	-	1	1	1	-	1	1	0	-	0	1	1	0	-	0	-	0	-	0	1	0	1	0	1	1	0	0	0	0	0	1	0	-	-	1	0	-	-	1	0	0	0	1	1	-	1	0	1
S11_685810	11	0	0	0	1	1	0	1	0	1	1	0	0	1	1	1	0	1	0	0	1	0	0	1	1	0	1	1	1	0	0	0	0	0	1	1	0	1	1	0	1	0	0	1	1	0	0	0	0
S11_692908	11	0	0	0	1	1	0	1	0	1	1	0	0	1	1	0	0	1	0	0	1	0	0	1	1	0	1	1	1	0	0	0	1	0	1	1	0	1	1	0	1	0	0	1	1	0	0	0	0
S11_806691	11	1	1	0	1	-	-	0	1	-	0	0	-	0	0	0	0	0	-	0	0	1	1	0	1	1	1	0	1	-	0	0	-	0	0	1	0	-	1	1	1	1	1	0	1	0	1	1	1
S11_907762	11	1	1	1	1	-	0	-	0	-	-	1	0	0	-	-	0	1	1	1	1	0	1	0	0	1	0	0	1	0	0	0	0	0	0	0	0	0	1	1	0	0	0	1	1	0	1	1	0
S11_921723	11	0	0	0	1	0	0	1	0	1	0	1	0	1	1	1	0	0	0	0	1	0	0	1	1	0	1	1	1	0	0	0	1	0	1	1	1	0	0	0	1	0	0	1	1	-	0	0	0
S11_922131	11	0	0	1	1	0	-	1	0	1	1	1	0	1	1	0	0	1	0	0	1	0	0	1	1	0	0	0	1	0	0	0	0	0	1	1	1	0	1	0	1	0	0	1	1	-	1	0	0
S11_935394	11	0	0	0	1	0	0	1	0	1	1	1	0	1	1	0	0	1	0	0	1	0	0	1	0	0	1	1	1	0	0	0	0	0	1	1	1	1	1	0	1	0	0	1	1	0	0	0	0
S11_954374	11	0	0	0	1	0	0	1	0	1	1	1	0	1	1	1	0	1	0	0	1	0	0	1	1	0	1	1	1	0	0	0	1	0	1	1	1	1	1	0	1	0	0	1	1	0	0	0	0
S11_996989	11	0	0	1	1	0	-	0	0	1	1	1	0	0	0	1	0	1	0	0	1	0	0	1	1	0	1	1	1	0	0	0	1	0	1	1	1	0	1	0	1	0	0	1	1	0	1	0	0
S11_1043759	11	0	0	0	1	1	0	1	0	0	1	1	0	1	1	0	0	0	0	0	1	0	0	1	1	0	1	1	1	0	0	0	0	0	1	0	1	0	1	0	1	0	0	1	1	0	0	0	0
S11_1047240	11	0	0	0	1	1	0	0	0	1	1	1	0	1	1	1	0	1	0	0	1	0	0	1	1	0	1	1	1	0	0	0	1	0	1	1	1	1	1	0	1	0	0	1	1	0	0	0	0
S11_1120582	11	0	0	0	0	1	0	1	0	-	1	1	1	-	0	-	-	0	1	-	1	1	0	1	0	0	0	0	1	-	-	0	-	0	0	1	1	1	0	0	0	0	1	1	0	0	0	1	-
S11_1146389	11	0	0	0	1	1	0	1	0	1	1	1	0	1	1	1	0	1	0	0	1	0	0	1	1	0	1	1	1	0	0	0	1	0	1	1	1	1	1	0	1	0	0	1	1	0	0	0	0
S11_1158604	11	0	0	0	1	1	0	1	0	1	1	1	0	1	1	1	0	1	0	0	1	0	0	1	1	0	1	1	1	0	0	0	1	0	1	1	1	1	1	0	1	0	0	1	1	0	0	0	0
S11_1182041	11	0	0	0	1	0	0	1	0	1	1	1	0	1	1	1	0	1	0	0	1	0	0	1	1	0	1	1	1	0	0	0	1	0	1	1	1	1	1	0	1	0	0	1	0	0	0	0	0
S11_1234597	11	0	0	0	1	1	0	1	0	1	1	1	0	1	1	1	0	1	0	0	1	0	0	1	1	0	1	1	1	0	0	0	1	0	1	1	1	1	1	0	1	0	0	1	1	0	0	0	0
S11_1238161	11	0	0	0	1	0	0	1	0	1	1	1	0	1	1	-	0	1	0	0	1	0	0	1	1	0	1	1	1	0	0	0	1	0	1	1	1	0	1	0	1	0	0	1	1	0	0	0	0
S11_1319330	11	-	0	0	1	1	0	1	0	0	-	0	0	1	1	-	0	1	0	0	0	0	0	1	1	0	1	1	1	0	0	0	1	0	1	1	1	0	1	0	1	0	0	1	1	0	1	0	0
S11_1333044	11	0	0	0	1	1	0	1	0	1	1	1	0	1	1	1	0	1	0	0	1	0	0	1	1	0	1	1	1	0	0	0	1	0	1	1	1	1	1	0	1	0	0	1	1	0	0	0	0
S11_1336718	11	0	0	0	1	1	0	0	0	1	1	1	0	1	1	1	0	1	0	0	1	0	0	1	1	0	0	1	1	0	0	0	1	0	1	1	1	1	1	0	1	0	0	1	1	0	0	0	0
S11_1345384	11	-	0	0	1	1	0	1	0	1	1	1	0	1	1	-	0	1	0	0	1	0	0	0	1	0	1	1	1	0	0	0	1	0	1	1	1	0	1	0	1	0	0	1	1	0	0	0	0
S11_1381514	11	0	0	0	1	1	0	1	0	1	0	1	0	1	1	0	0	1	0	0	1	0	0	1	1	0	1	1	1	0	0	0	1	0	1	1	1	1	1	0	1	0	0	1	1	0	0	0	0
S11_1401181	11	0	0	0	1	1	0	1	0	1	1	1	0	1	1	1	0	1	0	0	1	0	0	1	1	0	1	1	1	-	0	0	1	0	1	1	1	1	1	0	1	0	0	1	1	0	1	0	0
S11_1401449	11	0	0	0	1	0	0	0	0	1	1	1	0	1	1	1	0	1	0	0	1	0	0	1	1	0	1	1	1	0	0	0	1	0	0	1	1	1	1	0	1	0	0	1	1	0	0	0	0
S11_1421615	11	0	0	0	1	-	0	1	0	1	1	1	0	1	1	1	0	1	0	0	1	0	0	1	1	0	1	1	1	0	0	0	1	0	1	1	1	1	1	0	1	0	0	1	1	0	0	0	0
S11_1438195	11	0	0	0	1	1	0	1	0	1	1	1	0	1	1	1	0	1	0	0	1	0	0	1	1	0	1	1	1	0	0	0	1	0	1	1	1	1	1	0	1	0	0	1	1	0	0	0	0
S11_1443494	11	0	0	0	1	0	-	0	0	1	1	1	0	1	1	0	0	1	0	0	1	0	0	1	1	0	1	0	1	0	0	0	1	0	1	1	1	1	1	0	1	0	0	1	1	0	0	0	0
S11_1514365	11	0	0	0	1	1	0	1	0	1	1	1	0	0	1	1	0	1	0	0	1	0	0	1	1	0	1	1	1	0	0	0	1	0	1	1	1	1	1	0	1	0	0	1	1	0	0	0	0
S11_1528974	11	0	0	0	1	0	0	1	0	0	1	1	0	1	1	0	0	1	0	0	1	0	0	1	1	0	1	1	1	0	0	0	1	0	1	1	0	1	1	0	1	0	0	1	0	0	0	0	0
S11_1536111	11	0	0	0	1	1	-	1	0	1	1	1	0	1	1	1	0	1	0	0	1	0	0	1	1	0	1	1	1	0	0	0	1	0	1	1	1	1	1	0	1	0	0	1	1	0	0	0	0
S11_1548257	11	0	0	0	1	1	0	1	0	1	1	1	0	1	1	1	0	1	0	0	0	0	0	1	1	0	1	1	1	0	0	0	1	0	1	1	1	1	1	0	1	0	0	1	1	0	1	0	0
S11_1548378	11	0	0	0	1	0	0	0	0	1	1	1	0	1	1	-	0	1	0	0	0	0	0	1	1	0	1	1	1	0	0	0	1	0	1	1	1	1	1	0	1	0	0	1	1	0	1	0	0
S11_1566763	11	0	0	0	1	1	0	1	0	1	1	1	0	1	1	1	0	1	0	0	0	0	0	1	1	0	1	1	1	0	0	0	1	0	1	1	1	1	1	0	1	0	0	1	1	0	0	0	0
S11_1584357	11	0	0	0	1	1	0	1	0	1	1	1	0	1	1	1	0	1	0	0	0	0	0	1	1	0	1	1	1	0	0	0	1	0	1	1	1	1	1	0	1	0	0	1	1	0	1	0	0
S11_1683469	11	0	0	0	0	1	0	1	0	1	1	1	0	0	1	1	0	1	0	1	0	0	0	1	1	0	1	1	1	0	0	0	1	1	1	1	1	1	1	0	1	0	0	1	0	0	0	0	0
S11_1760066	11	0	0	1	0	-	0	1	1	1	1	1	1	1	1	1	1	1	0	1	1	0	1	1	1	0	0	1	1	0	0	1	1	1	1	1	1	1	1	1	0	1	1	0	1	0	1	0	0
S11_2109162	11	0	0	0	0	1	0	1	0	1	1	1	0	1	0	-	0	1	0	0	0	0	0	1	1	0	1	1	1	-	0	0	1	0	1	1	1	1	1	0	1	0	0	1	1	0	0	0	0
S11_2109264	11	0	0	0	0	1	0	1	0	1	1	1	0	1	1	0	0	1	0	0	0	0	0	1	1	0	1	1	1	0	0	0	1	0	1	1	1	1	1	0	1	0	0	1	1	0	0	0	0
S11_2121442	11	0	0	0	0	0	0	1	0	1	1	1	0	1	1	1	0	1	0	0	0	0	0	1	1	0	1	1	1	0	0	0	1	0	1	1	1	1	1	0	1	0	0	1	1	0	0	0	0
S11_2121803	11	0	0	0	0	-	0	1	0	0	1	1	0	1	1	1	0	1	0	0	0	0	0	1	1	0	1	1	1	0	0	0	1	0	1	1	1	1	1	0	1	0	0	1	1	0	0	0	0
S11_2130811	11	0	0	0	0	1	0	1	0	1	1	1	0	1	1	1	0	1	0	0	0	0	0	1	1	0	1	1	1	0	0	0	1	0	1	1	1	1	1	0	1	0	0	1	1	0	0	0	0
S11_2131096	11	0	0	0	0	1	0	1	0	1	1	1	0	1	1	1	0	1	0	0	0	0	0	1	1	0	1	1	1	0	0	0	1	0	1	1	1	1	1	0	1	0	0	1	1	0	0	0	0
S11_2134740	11	0	0	0	0	1	0	1	0	1	1	1	0	1	1	1	0	1	0	0	0	0	0	1	1	0	1	1	1	0	0	0	1	0	1	1	1	1	1	0	1	0	0	1	1	0	0	0	0
S11_2141012	11	0	0	0	0	-	0	1	0	1	1	1	0	1	1	1	0	1	0	0	0	0	0	1	1	0	1	1	1	0	0	0	1	0	1	1	1	1	1	0	1	0	0	1	1	0	0	0	0
S11_2184402	11	0	0	0	0	1	0	1	0	1	1	1	0	1	1	1	0	1	0	0	0	0	0	1	1	0	1	1	1	0	0	0	1	0	0	1	1	1	1	0	1	0	0	1	1	0	0	0	0
S11_2287690	11	0	0	0	0	1	0	1	0	1	1	1	0	0	1	1	0	1	0	0	0	0	0	1	1	0	1	1	1	0	0	0	1	0	1	1	1	1	1	0	1	0	0	1	1	0	0	0	0
S11_2288704	11	0	0	0	0	1	0	1	0	1	1	1	0	0	1	1	0	1	0	0	0	0	0	1	1	0	1	1	1	0	0	0	1	0	1	1	1	1	1	0	1	0	0	1	1	0	0	0	0
S11_2289383	11	0	0	0	0	0	0	1	0	1	1	1	0	0	1	-	0	1	0	0	0	0	0	1	1	0	1	1	1	0	0	0	0	0	1	1	1	1	1	0	1	0	0	1	1	0	0	0	0
S11_2421723	11	0	0	0	0	0	0	1	0	1	1	1	0	0	1	0	0	1	0	0	0	0	0	1	1	0	1	1	1	0	0	0	1	0	1	1	1	1	1	0	1	0	0	1	1	0	0	0	0
S11_2454247	11	0	0	0	0	1	0	1	0	1	1	1	0	0	1	1	0	0	0	0	0	0	0	1	1	0	1	0	0	0	0	0	1	0	1	1	1	1	1	0	1	0	0	1	1	0	0	0	0
S11_2491516	11	0	0	0	0	1	0	1	0	1	1	1	0	0	1	1	0	1	0	0	0	1	0	1	1	0	1	1	1	0	0	0	1	0	1	1	1	1	1	0	1	0	0	1	1	0	0	0	0
S11_2651483	11	0	0	0	0	1	0	1	0	1	1	1	0	0	1	1	0	1	0	0	0	0	0	1	1	0	1	1	1	0	0	0	1	0	1	1	1	1	1	0	1	0	0	1	1	0	0	0	0
S11_2711889	11	0	0	1	0	1	0	1	0	1	1	1	0	0	1	1	0	1	0	0	0	1	0	1	1	0	1	1	1	0	0	0	1	0	1	1	1	1	1	0	1	0	0	1	1	0	1	0	0
S11_2728725	11	0	0	0	0	-	0	1	0	1	1	1	0	0	1	1	0	1	0	0	0	1	0	1	1	0	1	0	1	0	0	0	1	0	1	0	1	1	1	0	1	0	0	1	1	0	0	0	0
S11_2728837	11	0	0	0	0	1	0	1	0	1	1	1	0	0	1	0	0	1	0	0	0	1	0	1	1	0	1	0	1	0	0	0	1	0	0	1	1	1	1	0	1	0	0	1	1	0	0	0	0
S11_2728938	11	0	0	0	0	-	0	1	0	1	1	1	0	0	1	1	0	1	-	0	0	0	0	1	1	0	1	1	1	0	0	0	1	0	0	1	1	1	1	0	1	0	0	1	1	0	0	0	0
S11_2748361	11	0	0	0	0	1	0	1	0	1	1	1	0	0	1	1	0	1	0	0	0	0	0	1	1	0	1	1	1	0	0	0	1	0	1	1	1	1	1	0	1	0	0	1	1	0	0	0	0
S11_2758318	11	0	0	0	0	1	0	1	0	1	1	1	0	0	1	0	0	1	0	0	0	0	0	1	1	0	1	1	1	0	0	0	1	0	1	1	1	1	1	0	1	0	0	1	1	0	0	0	0
S11_2761702	11	0	0	0	0	1	0	1	0	1	0	1	0	0	1	0	0	1	0	0	0	0	0	1	1	0	1	1	1	0	0	0	1	0	1	1	1	1	1	0	1	0	0	1	1	0	0	0	0
S11_2791491	11	0	0	0	0	1	0	1	0	1	1	1	0	0	1	1	0	1	0	0	0	1	0	1	1	0	1	1	1	0	0	0	1	0	1	1	1	1	1	0	1	0	0	1	1	0	0	0	0
S11_2807151	11	0	0	0	0	-	0	1	0	1	1	1	0	0	1	0	0	1	0	0	0	0	0	1	1	0	1	1	1	0	0	0	1	0	1	1	1	1	0	0	1	0	0	1	1	0	0	0	0
S11_2808927	11	0	0	0	0	1	0	1	0	1	1	1	0	0	1	1	0	1	0	0	0	0	0	1	1	0	1	1	1	0	0	0	1	0	1	1	1	1	1	0	0	0	0	1	1	0	0	0	0
S11_2821598	11	0	0	0	0	1	0	1	0	1	1	1	0	0	1	1	0	1	0	0	0	0	0	1	1	0	1	1	1	0	0	0	1	0	1	1	1	1	1	0	1	0	0	1	1	0	0	0	0
S11_2842014	11	0	0	0	0	1	0	1	0	1	1	1	0	0	1	-	0	1	0	0	0	1	0	1	1	0	1	1	1	0	0	0	1	0	1	1	1	1	1	0	1	0	0	0	1	0	0	0	0
S11_2858842	11	0	0	1	0	1	-	1	0	1	0	1	0	0	1	0	0	1	0	0	0	0	0	1	1	0	1	1	1	0	0	0	1	0	1	1	1	1	1	0	1	0	0	1	1	0	1	0	0
S11_2892250	11	0	0	0	0	1	0	1	0	1	1	1	0	0	1	1	0	1	0	0	0	1	0	1	1	0	1	1	1	0	0	0	1	0	1	1	1	1	1	0	1	0	0	1	1	0	1	0	0
S11_2895863	11	0	0	0	0	0	0	1	0	1	1	1	0	0	1	0	0	1	0	0	0	1	0	1	1	0	1	1	1	0	0	0	0	0	1	1	1	1	1	0	1	0	0	1	1	0	1	0	0
S11_2916654	11	0	0	0	0	1	0	1	0	1	1	1	0	0	1	0	0	1	0	0	0	1	0	1	1	0	1	1	1	0	0	0	1	0	1	1	1	1	1	0	1	0	0	1	1	0	0	0	0
S11_3023535	11	0	0	0	0	0	0	1	0	1	1	1	0	0	1	1	0	1	0	0	0	0	0	1	1	0	1	1	1	0	0	0	1	0	1	1	1	0	0	0	1	0	0	1	1	0	0	0	0
S11_3051256	11	0	0	0	0	1	0	1	0	1	1	1	0	0	1	0	0	1	0	0	0	0	0	1	1	0	1	1	1	0	0	0	1	0	1	1	1	0	1	0	1	0	0	1	1	0	0	0	0
S11_3053551	11	0	0	0	0	0	0	1	0	1	1	1	0	0	1	1	0	1	0	0	0	1	0	1	1	0	1	1	1	0	0	0	0	0	0	1	1	1	1	0	0	0	0	1	1	0	0	0	0
S11_3087303	11	0	0	0	0	1	0	1	0	1	1	1	0	0	1	1	0	1	0	0	0	0	0	1	1	0	1	1	1	0	0	0	1	0	1	1	1	1	1	0	1	0	0	1	1	0	0	0	0
S11_3123502	11	0	0	0	0	1	0	1	0	1	1	1	0	0	1	1	0	1	0	0	0	1	0	1	1	0	1	1	1	0	0	0	1	0	1	1	1	1	1	0	1	0	0	1	1	0	0	0	0
S11_3130061	11	0	0	0	0	0	0	1	0	1	1	1	0	0	1	-	0	1	0	0	0	0	0	1	1	0	1	1	1	0	0	0	1	0	0	1	1	1	1	0	1	0	0	1	1	0	0	0	0
S11_3141500	11	0	0	0	0	1	0	1	0	1	1	1	0	0	1	1	0	1	0	0	0	1	0	1	1	0	1	1	1	0	0	0	1	0	1	1	1	1	1	0	1	0	0	1	1	0	0	0	0
S11_3183354	11	0	0	1	0	1	0	1	0	1	1	1	0	0	1	0	0	1	0	0	0	1	0	1	1	0	1	1	1	0	0	0	1	0	1	1	1	1	0	0	1	0	0	1	1	0	1	0	0
S11_3183463	11	0	0	0	0	1	0	1	0	1	1	1	0	0	1	1	0	1	0	0	0	1	0	1	1	0	1	1	1	0	0	0	1	0	1	1	1	1	1	0	1	0	0	1	1	0	0	0	0
S11_3183582	11	0	0	1	0	-	0	1	0	1	1	1	0	0	1	0	0	1	0	0	0	1	0	1	1	0	1	1	1	-	0	0	0	0	1	1	1	1	1	0	1	0	0	1	1	0	1	0	0
S11_3262982	11	0	0	0	0	0	0	1	0	0	1	1	0	0	1	0	0	1	0	0	0	0	0	1	1	0	1	1	1	0	0	0	1	0	1	1	1	1	1	0	1	0	0	1	1	0	0	0	0
S11_3263134	11	0	0	0	0	0	0	1	0	1	1	1	0	0	1	0	0	1	1	0	0	0	0	1	1	0	0	1	1	0	0	0	1	0	1	1	1	1	1	0	1	0	0	1	1	0	0	0	0
S11_3279543	11	0	0	0	0	1	0	1	0	1	1	1	0	0	1	1	0	1	0	0	0	1	0	1	1	0	1	1	1	0	0	0	1	0	1	1	1	1	1	0	1	0	0	1	1	0	0	0	0
S11_3454085	11	0	0	0	0	1	0	1	0	1	1	1	0	0	1	1	0	1	0	0	0	0	0	1	1	0	1	1	1	0	0	0	1	0	1	1	1	1	1	0	1	0	0	1	1	0	0	0	0
S11_3571676	11	0	0	0	0	1	0	1	0	1	1	1	0	0	1	1	0	1	0	0	0	1	0	1	1	0	1	1	1	0	0	0	1	0	1	1	1	1	1	0	1	0	0	1	1	0	0	0	0
	11 Average	0.0185185	0.0267857	0.0810811	0.526786	0.693878	0.00980392	0.936937	0.0178571	0.944444	0.936364	0.723214	0.036036	0.576577	0.963303	0.680412	0.00909091	0.910714	0.037037	0.027027	0.517857	0.169643	0.0357143	0.964286	0.964286	0.0267857	0.928571	0.892857	0.982143	0	0	0.0178571	0.863636	0.018018	0.772727	0.973214	0.705357	0.909091	0.918919	0.0357143	0.9375	0.0178571	0.0357143	0.973214	0.964286	0	0.151786	0.0357143	0.018018
S12_90828	12	0	1	1	1	0	0	0	1	0	1	0	0	1	1	1	0	0	1	1	0	1	1	0	1	1	0	1	0	1	1	0	0	1	1	1	0	1	1	0	1	0	0	1	0	1	1	0	1
S12_254020	12	0	1	0	1	0	0	0	0	0	-	0	-	1	1	0	0	0	0	0	0	1	1	0	1	1	0	1	0	0	0	0	0	0	1	1	0	1	1	0	1	0	0	1	0	-	0	-	1
S12_453126	12	0	1	0	1	0	0	0	0	0	0	0	0	1	1	-	0	0	1	1	0	1	1	0	0	1	0	1	0	1	1	0	0	1	1	0	0	1	1	0	1	0	0	0	0	1	0	0	1
	12 Average	0	1	0.333333	1	0	0	0	0.333333	0	0.5	0	0	1	1	0.5	0	0	0.666667	0.666667	0	1	1	0	0.666667	1	0	1	0	0.666667	0.666667	0	0	0.666667	1	0.666667	0	1	1	0	1	0	0	0.666667	0	1	0.333333	0	1
S13_44576	13	0	1	1	1	0	1	1	0	0	0	1	0	1	0	1	0	0	-	1	1	0	1	1	1	1	0	0	0	0	0	1	0	0	1	1	1	0	-	0	1	1	0	0	1	-	1	0	1
S13_64571	13	0	0	0	1	0	1	0	0	0	0	1	0	1	1	-	1	0	0	1	1	1	0	0	0	1	0	1	1	1	1	0	0	0	0	1	1	0	0	0	0	1	1	0	1	1	1	1	0
	13 Average	0	0.5	0.5	1	0	1	0.5	0	0	0	1	0	1	0.5	1	0.5	0	0	1	1	0.5	0.5	0.5	0.5	1	0	0.5	0.5	0.5	0.5	0.5	0	0	0.5	1	1	0	0	0	0.5	1	0.5	0	1	1	1	0.5	0.5
S15_68702	15	0	0	0	0	1	0	1	0	0	1	1	1	0	0	-	0	0	1	0	1	1	0	1	0	0	0	1	1	0	0	0	0	0	0	1	1	1	0	0	0	0	1	1	0	0	0	1	0
S15_255804	15	-	0	0	0	1	0	1	0	0	-	0	0	0	0	-	0	0	-	0	1	1	0	1	0	0	0	1	0	0	0	0	0	-	0	1	1	1	0	0	0	0	1	1	0	0	0	1	0
S15_473281	15	0	0	0	0	1	0	1	0	0	1	1	1	0	0	0	0	0	1	0	1	1	0	1	0	0	0	1	1	0	1	0	0	0	0	1	1	1	0	0	0	0	1	1	0	0	0	1	0
S15_476685	15	0	0	0	0	1	0	1	0	0	1	1	1	0	0	0	0	0	1	0	1	1	0	1	0	0	0	0	1	0	0	0	0	0	0	1	1	1	0	0	0	0	1	1	0	0	0	1	0
	15 Average	0	0	0	0	1	0	1	0	0	1	0.75	0.75	0	0	0	0	0	1	0	1	1	0	1	0	0	0	0.75	0.75	0	0.25	0	0	0	0	1	1	1	0	0	0	0	1	1	0	0	0	1	0
S16_192715	16	0	0	0	1	1	0	0	0	0	0	1	0	1	1	0	1	0	0	1	1	0	0	0	0	1	0	1	1	1	1	0	1	0	0	1	1	0	0	0	0	1	1	0	1	1	1	1	0
S16_627852	16	0	1	0	1	1	0	1	1	1	0	1	1	1	1	-	0	1	1	0	1	0	0	0	1	1	1	1	0	0	0	0	1	1	1	1	0	0	1	1	1	1	1	1	1	0	1	1	0
S16_927864	16	0	0	0	1	0	0	0	0	0	0	0	0	1	1	-	1	0	0	1	1	1	0	0	0	1	0	1	1	1	1	0	0	0	0	0	1	0	0	0	0	1	1	0	1	1	1	0	0
	16 Average	0	0.333333	0	1	0.666667	0	0.333333	0.333333	0.333333	0	0.666667	0.333333	1	1	0	0.666667	0.333333	0.333333	0.666667	1	0.333333	0	0	0.333333	1	0.333333	1	0.666667	0.666667	0.666667	0	0.666667	0.333333	0.333333	0.666667	0.666667	0	0.333333	0.333333	0.333333	1	1	0.333333	1	0.666667	1	0.666667	0
S18_125731	18	0	1	0	1	0	0	0	1	0	1	0	0	0	1	1	0	0	1	1	0	1	1	1	1	1	0	1	0	1	1	0	0	1	1	1	0	1	1	0	1	0	0	1	0	0	0	0	1
S18_259600	18	0	1	0	1	0	0	0	1	0	1	0	0	0	1	1	0	0	1	1	0	1	1	1	1	1	0	1	0	1	1	0	0	1	1	1	0	1	1	0	1	0	0	1	0	0	0	0	1
S18_260166	18	0	1	0	1	0	0	0	1	0	1	0	0	0	1	1	0	0	1	0	0	1	1	1	1	1	0	1	0	1	1	0	0	1	1	1	0	1	1	0	1	0	0	1	0	0	0	0	1
S18_284195	18	0	1	0	1	0	0	0	1	0	1	0	0	0	1	1	0	0	0	1	0	1	1	1	1	1	0	1	0	1	1	0	0	1	1	1	0	1	0	0	1	0	0	1	0	0	0	0	1
S18_294589	18	0	1	0	1	-	0	0	1	0	1	0	0	0	1	-	0	0	-	0	0	1	1	1	1	1	0	0	-	0	1	0	-	0	0	1	0	1	0	0	1	0	0	1	0	-	0	0	1
S18_309274	18	0	1	0	1	0	0	0	1	0	1	0	0	0	1	1	0	0	1	1	0	1	1	1	1	1	0	1	0	1	1	0	0	1	1	1	0	1	1	0	1	0	0	1	1	0	0	0	1
S18_385436	18	0	1	0	1	0	0	0	1	0	1	0	0	0	1	-	0	0	0	1	0	-	1	1	0	1	0	1	0	0	1	0	0	0	0	1	0	1	1	0	1	0	0	1	1	0	0	0	1
S18_386718	18	0	1	0	1	0	0	0	1	0	1	0	0	0	1	1	0	0	1	1	0	1	1	1	1	1	0	1	0	1	1	0	0	1	1	1	0	1	1	0	1	0	0	1	1	0	0	0	1
S18_428370	18	0	1	0	1	0	0	0	1	0	1	0	0	0	1	-	0	0	0	-	0	0	1	1	1	1	0	1	0	-	1	0	0	1	0	1	0	1	1	0	1	0	0	0	0	0	0	0	0
S18_515682	18	0	1	0	1	-	-	0	0	0	0	0	0	0	1	-	0	0	1	0	0	0	1	1	1	1	0	1	0	0	-	0	0	1	0	1	0	1	1	0	1	0	0	1	1	-	0	0	1
S18_531215	18	0	1	0	1	0	0	0	1	0	1	0	0	0	1	0	0	0	1	1	0	1	1	1	1	1	0	1	0	0	0	0	0	1	0	1	0	1	1	0	1	0	0	1	1	0	0	0	1
S18_661880	18	0	1	0	1	0	0	0	1	0	1	0	0	0	1	1	0	0	1	1	0	1	1	1	1	1	0	1	0	1	1	0	0	1	1	1	0	1	1	0	1	0	0	1	1	0	0	0	1
S18_667567	18	0	1	0	1	0	0	0	1	0	1	0	0	0	1	-	0	0	0	1	0	1	1	1	1	1	0	1	0	0	1	0	0	1	0	1	0	1	0	0	1	0	0	1	1	0	0	0	1
S18_778749	18	0	1	0	1	0	0	0	1	0	0	0	0	0	1	1	0	0	1	1	0	1	1	1	1	1	0	1	0	0	0	0	0	1	1	1	0	1	1	0	1	0	0	0	1	0	0	0	1
S18_778849	18	0	1	0	1	-	0	0	1	0	1	0	0	0	1	1	0	0	1	1	0	1	1	1	1	1	0	1	0	1	0	0	0	1	0	1	0	1	1	0	1	0	0	1	1	0	0	0	1
S18_795145	18	0	1	0	1	0	0	0	1	0	1	0	-	0	0	-	0	0	0	1	0	0	1	1	1	1	0	1	0	1	1	0	0	1	-	1	0	1	0	0	1	0	0	1	1	0	0	0	1
S18_834484	18	0	1	0	1	0	0	0	1	0	1	0	0	0	1	1	0	0	1	1	0	1	1	1	1	1	0	1	0	1	1	0	0	1	1	1	0	1	1	0	1	0	0	1	1	0	0	0	1
S18_905173	18	0	1	0	1	-	0	0	1	0	1	0	0	0	0	-	0	0	0	1	0	1	1	1	1	1	0	0	0	-	-	0	-	0	0	1	0	1	-	0	1	0	0	0	1	0	0	0	0
S18_906974	18	0	1	0	1	0	0	0	1	0	1	0	0	0	1	-	0	0	1	1	0	1	1	1	1	1	0	0	0	0	1	0	0	1	1	1	0	1	1	0	1	0	0	1	1	0	0	0	1
S18_942472	18	0	1	0	1	0	0	0	1	0	1	0	-	0	1	0	0	0	1	0	0	1	1	1	1	1	0	0	0	0	1	0	0	1	1	1	0	1	1	0	1	0	0	1	1	0	0	0	1
S18_948315	18	0	1	0	1	0	0	0	1	0	0	0	0	0	1	0	0	0	0	-	0	0	1	1	1	0	0	1	0	1	0	0	0	1	0	1	0	1	0	0	1	0	0	1	1	0	0	0	1
S18_952763	18	0	1	0	1	0	0	0	1	0	1	0	0	0	1	1	0	0	0	1	0	1	1	1	1	1	0	0	0	1	1	0	0	1	0	1	0	1	1	0	1	0	0	1	1	0	0	0	1
S18_970785	18	0	1	0	0	-	-	0	1	0	1	0	0	0	1	0	-	0	1	1	0	1	1	1	1	1	0	1	0	0	0	0	0	1	0	1	0	1	-	0	1	0	0	1	1	0	-	0	1
S18_971509	18	0	1	0	1	0	0	0	1	0	1	0	0	0	1	1	0	0	1	1	0	1	1	1	1	1	0	1	0	1	1	0	0	1	1	1	0	1	1	0	1	0	0	1	1	0	0	0	1
S18_980782	18	0	1	0	1	0	0	0	1	0	1	0	0	0	1	0	0	0	1	1	0	1	1	1	1	1	0	0	0	-	0	0	0	0	1	1	0	1	0	0	1	0	0	1	1	0	0	0	1
S18_980920	18	0	0	0	1	-	-	0	1	0	0	0	0	0	1	0	0	0	1	1	0	-	1	1	1	1	0	0	0	-	-	0	0	1	0	0	0	1	0	0	1	0	0	1	1	0	0	0	0
S18_981843	18	0	1	0	1	0	0	0	1	0	1	0	0	0	1	0	0	0	1	1	0	1	1	1	1	1	0	1	0	1	1	0	0	1	1	1	0	1	1	0	1	0	0	1	1	0	0	0	1
S18_997010	18	0	1	0	1	0	0	0	1	0	1	0	0	0	1	0	0	0	1	1	0	1	1	1	1	1	0	1	0	0	0	0	0	1	1	0	0	1	1	0	1	0	0	1	1	0	0	0	1
S18_998277	18	0	1	0	1	0	0	0	1	0	1	0	0	0	1	0	0	0	1	1	0	1	1	1	1	1	0	1	0	1	1	0	0	1	1	1	0	1	1	0	1	0	0	1	1	0	0	0	1
S18_1023096	18	0	1	0	1	-	0	0	1	0	1	0	0	0	0	0	0	0	1	1	0	0	0	1	1	1	0	1	0	1	0	0	0	0	0	1	0	1	0	0	1	0	0	1	0	0	0	0	0
S18_1034820	18	0	1	0	1	0	0	0	1	0	1	0	0	0	1	1	0	0	1	1	0	1	1	1	1	1	0	1	0	1	1	0	0	1	1	1	0	1	1	0	1	0	0	1	1	0	0	0	1
S18_1086199	18	0	1	0	1	0	0	0	1	0	1	0	0	0	1	1	0	0	1	1	0	0	1	1	1	1	0	1	0	1	0	0	0	1	1	1	0	1	1	0	1	0	0	1	1	0	0	0	1
S18_1102770	18	0	1	1	1	0	0	0	1	0	1	0	0	0	1	1	0	0	1	1	0	1	1	1	1	1	0	1	0	1	1	0	0	1	1	1	0	1	1	0	1	0	0	1	1	0	0	0	1
S18_1111403	18	0	1	0	1	-	0	0	1	0	1	0	0	0	1	1	0	0	1	1	0	1	0	1	1	1	0	1	0	1	0	0	0	1	0	1	0	1	1	0	1	0	0	1	1	0	0	0	1
S18_1111796	18	0	1	0	1	0	0	0	0	0	1	0	0	0	0	-	0	0	0	1	0	0	1	1	0	1	0	1	0	0	0	0	0	0	0	1	0	1	1	0	1	-	0	1	1	0	0	0	1
S18_1123181	18	0	1	0	1	0	0	0	1	0	1	0	0	0	1	0	0	0	1	1	0	0	1	1	1	1	0	1	0	0	1	0	0	1	0	1	0	1	1	0	1	0	0	1	1	0	0	0	1
S18_1141544	18	0	1	0	1	0	0	0	1	0	1	0	0	0	1	-	0	0	1	1	0	1	1	1	1	1	0	1	0	1	1	0	0	1	1	1	0	1	1	0	1	0	0	1	1	0	0	0	1
S18_1143490	18	0	1	-	1	0	-	0	1	-	-	0	0	0	1	-	-	0	0	0	0	1	1	1	1	1	0	1	0	0	0	0	0	1	1	0	0	0	1	0	1	0	0	1	1	0	0	0	1
S18_1147450	18	0	1	0	1	0	0	0	1	0	1	0	0	0	1	0	0	0	1	1	0	1	1	1	1	1	0	1	0	1	1	0	0	0	1	1	0	1	1	0	1	0	0	1	1	0	0	0	1
S18_1160938	18	0	1	0	1	-	0	0	1	0	1	0	0	0	1	0	0	0	0	1	0	1	1	1	1	1	0	1	0	1	0	0	0	0	0	1	0	1	1	0	1	0	0	0	0	0	0	0	1
S18_1189254	18	0	1	0	1	0	-	0	1	0	1	0	0	0	1	0	0	0	1	1	0	0	1	1	1	1	0	1	0	0	1	0	0	1	1	1	0	1	1	0	1	0	0	1	1	0	0	0	1
S18_1238794	18	0	1	0	1	-	-	0	1	0	1	0	0	0	1	-	0	0	0	1	0	0	1	1	1	1	0	1	0	1	1	0	0	1	1	1	0	1	1	0	1	0	0	1	1	-	0	0	1
S18_1252351	18	0	1	0	1	0	0	0	1	0	1	0	0	0	1	0	0	0	0	1	0	0	1	1	1	1	0	1	0	1	1	0	0	1	1	1	0	1	1	0	1	0	0	1	1	0	0	0	1
S18_1259771	18	0	1	0	1	0	0	0	1	0	0	0	0	0	0	-	0	0	0	1	0	1	1	1	1	1	0	1	0	0	1	0	0	0	1	1	0	1	1	0	1	0	0	1	1	0	0	0	1
S18_1394431	18	0	1	0	1	0	0	0	1	0	1	0	0	0	1	1	0	0	1	1	0	1	1	1	1	1	0	1	0	1	1	0	0	1	1	1	0	1	1	0	1	0	0	1	1	0	0	0	1
S18_1402963	18	0	1	0	1	0	0	0	1	0	1	0	0	0	1	1	0	0	1	1	0	1	1	1	1	1	0	1	0	1	0	0	0	1	1	0	0	1	1	0	1	0	0	1	1	0	0	0	1
S18_1403107	18	0	1	0	1	0	0	0	1	0	1	0	0	0	1	1	0	0	1	1	0	1	1	1	1	1	0	1	0	0	0	0	0	1	1	1	0	1	1	0	1	0	0	1	1	0	0	0	1
S18_1445538	18	0	1	0	1	0	0	0	1	0	1	0	0	0	1	1	0	0	1	1	0	1	1	1	1	1	0	1	0	1	1	0	0	1	1	1	0	1	1	0	1	0	0	1	1	0	0	0	1
S18_1447218	18	0	1	0	1	0	1	0	1	0	0	0	0	0	1	-	-	0	1	1	0	0	1	1	1	1	0	1	0	0	1	-	0	1	0	1	0	1	0	0	1	0	0	0	1	0	0	0	0
S18_1448700	18	0	1	0	1	0	0	0	1	0	1	0	0	0	1	0	0	0	0	1	0	1	1	1	1	1	0	1	0	1	1	0	0	1	1	1	0	1	1	0	1	0	0	1	1	0	0	0	1
S18_1455073	18	0	1	0	1	0	-	0	1	0	1	0	0	0	1	-	0	0	0	1	0	1	1	1	1	1	0	1	0	1	0	0	0	1	1	1	0	1	1	0	1	0	0	1	1	0	0	0	1
S18_1486631	18	0	1	0	1	-	-	0	1	0	1	0	0	0	1	0	0	0	0	1	0	0	1	1	1	1	0	1	0	1	-	0	0	1	1	1	0	1	0	0	0	0	0	1	1	0	0	0	1
S18_1540034	18	0	1	0	1	0	0	0	1	0	1	0	0	0	0	1	0	0	1	1	0	1	1	1	1	1	0	1	0	-	1	0	0	1	1	1	0	1	0	0	1	0	0	1	1	0	0	0	1
S18_1540159	18	0	1	0	1	0	0	0	1	0	1	0	0	0	1	0	0	0	0	1	0	1	1	1	1	1	0	1	0	1	1	0	0	1	1	1	0	1	1	0	1	0	0	1	1	0	0	0	1
S18_1592628	18	0	1	0	1	0	0	0	1	0	1	0	0	0	1	0	0	0	0	1	0	1	1	1	1	1	0	1	0	1	1	0	0	1	1	1	0	1	1	0	1	0	0	1	1	0	0	0	1
S18_1592751	18	0	1	0	1	0	0	0	1	0	1	0	0	0	1	1	0	0	1	1	0	1	1	1	1	1	0	1	0	1	1	0	0	1	1	1	0	1	1	0	1	0	0	1	1	0	0	0	1
S18_1596430	18	0	1	-	1	0	0	0	1	0	0	0	0	0	1	-	0	0	1	0	0	1	1	1	1	1	-	1	0	-	0	0	0	1	1	0	0	0	1	0	1	0	0	1	1	0	0	0	1
S18_1644750	18	0	1	0	1	0	-	0	1	0	1	0	0	0	1	-	0	0	1	0	0	0	1	1	1	1	0	1	0	-	1	0	-	1	0	1	0	1	1	0	1	-	0	1	1	0	0	0	1
S18_1682507	18	0	1	0	1	0	0	0	1	0	1	0	0	0	1	0	0	0	1	0	0	1	1	1	1	0	0	1	0	-	0	0	0	1	0	1	0	0	1	0	1	0	0	1	1	0	0	0	1
S18_1720960	18	0	1	0	1	0	-	0	1	0	0	0	0	0	1	-	0	0	0	1	0	1	1	1	1	1	0	1	0	-	0	0	0	1	0	1	0	1	1	0	1	0	0	1	0	0	0	0	1
S18_1794343	18	0	1	0	1	0	0	0	1	0	1	0	0	0	1	0	0	0	1	1	0	1	1	1	1	1	0	1	0	1	1	0	0	0	1	1	0	1	1	0	1	0	0	1	1	0	0	0	1
S18_1847708	18	0	1	0	1	0	0	0	1	0	1	0	0	0	1	-	0	0	0	1	0	1	1	1	1	1	0	1	0	1	1	0	0	1	1	1	0	1	1	0	1	0	0	1	1	0	0	0	1
S18_1884893	18	0	1	0	1	0	0	0	1	0	0	0	-	0	1	0	0	0	1	0	0	1	1	1	1	1	0	0	0	-	1	0	0	1	-	0	0	1	1	0	1	-	0	1	1	0	0	0	1
S18_1886513	18	0	1	0	1	0	0	0	1	0	1	0	0	0	1	1	0	0	1	1	0	1	1	1	1	1	0	1	0	1	1	0	0	1	1	1	0	1	1	0	1	0	0	1	1	0	0	0	1
S18_1887848	18	0	1	0	1	0	0	0	1	0	1	0	0	0	1	1	0	0	1	1	0	1	1	1	1	1	0	1	0	1	1	0	0	1	1	1	0	1	1	0	1	0	0	1	1	0	0	0	1
S18_1946336	18	0	0	0	1	0	0	0	1	0	1	0	0	0	1	1	0	0	0	1	0	0	1	1	1	1	0	0	0	1	1	0	0	0	1	1	0	1	1	0	0	0	0	1	1	0	0	0	1
S18_1979643	18	0	1	0	1	0	-	0	1	0	1	0	0	0	1	1	0	0	1	1	0	1	1	1	1	1	0	1	0	1	1	0	-	1	1	1	0	1	1	0	1	0	0	1	0	0	0	0	1
S18_1984083	18	0	1	0	1	-	-	0	1	0	1	0	0	0	-	1	0	-	-	-	0	-	1	1	1	-	0	1	0	-	-	0	0	1	1	1	0	1	1	0	1	-	0	1	1	0	0	0	1
S18_1985405	18	0	1	0	1	-	0	0	1	0	1	0	0	0	1	0	0	0	1	1	0	1	1	1	1	1	0	1	0	1	1	0	0	0	1	1	0	1	1	0	1	0	0	1	1	0	0	0	1
S18_1990093	18	0	1	0	1	0	0	0	1	0	1	0	0	0	1	1	0	0	1	1	0	1	1	1	1	1	0	1	0	1	1	0	0	1	1	1	0	1	1	0	1	0	0	1	1	0	0	0	1
S18_2023659	18	0	1	0	1	0	0	0	0	0	0	0	0	0	1	1	0	0	0	1	0	1	0	1	1	1	0	1	0	1	1	0	-	1	1	1	0	1	1	0	1	0	0	1	1	0	0	0	1
S18_2051988	18	0	1	0	1	0	0	0	1	0	1	0	0	0	1	0	0	0	1	1	0	1	1	1	1	1	0	1	0	1	1	0	0	1	0	1	0	1	1	0	1	0	0	1	1	0	0	0	1
S18_2059286	18	-	1	0	1	0	-	0	1	0	0	0	-	0	1	-	0	0	-	1	0	-	1	1	1	1	0	1	0	-	0	0	0	1	1	0	0	1	1	0	0	-	0	1	1	0	0	0	1
S18_2061756	18	0	1	0	1	0	0	0	1	0	1	0	0	0	1	1	0	0	1	1	0	1	1	1	1	1	0	1	0	1	1	0	0	1	1	1	0	1	1	0	1	0	0	1	1	0	0	0	1
S18_2089502	18	0	1	0	1	0	0	0	1	0	1	0	0	0	1	1	0	0	1	1	0	1	1	1	1	1	0	1	0	1	1	0	0	1	1	1	0	1	1	0	1	0	0	1	1	0	0	0	1
S18_2102674	18	0	1	0	1	-	0	0	0	0	1	0	0	0	0	-	0	0	-	0	0	1	1	1	1	1	0	0	0	-	0	0	0	1	-	1	0	0	0	0	1	0	0	1	1	-	0	0	0
S18_2109409	18	0	1	0	1	0	0	0	1	0	1	0	0	0	1	-	0	0	1	1	0	1	1	1	1	1	0	1	0	1	0	0	0	1	1	1	0	1	1	0	1	0	0	1	1	0	0	0	1
S18_2189896	18	0	1	0	1	0	0	0	1	0	1	0	0	0	1	-	0	0	1	1	0	1	0	1	1	1	0	1	0	0	0	0	0	1	1	1	0	1	1	0	1	0	0	1	1	0	0	0	1
S18_2225562	18	0	1	0	1	0	0	0	1	0	1	0	0	0	1	1	0	0	1	1	0	1	1	1	1	1	0	1	0	1	1	0	0	1	1	1	0	1	1	0	1	0	0	1	1	0	0	0	1
S18_2225934	18	0	1	0	1	0	0	0	1	0	1	0	0	0	1	0	0	0	1	1	0	1	1	1	1	1	0	1	0	1	1	0	0	1	1	1	0	1	1	0	1	0	0	1	1	0	0	0	1
S18_2226492	18	0	1	0	1	0	0	0	1	0	1	0	0	0	1	0	0	0	1	1	0	1	1	1	1	1	0	1	0	1	1	0	0	1	1	1	0	1	1	0	1	0	0	1	1	0	0	0	1
S18_2226643	18	0	1	0	1	0	0	0	1	0	1	0	0	0	1	1	0	0	1	1	0	1	1	1	1	1	0	1	0	1	1	0	0	1	1	1	0	1	1	0	1	0	0	1	1	0	0	0	1
S18_2260228	18	-	1	-	1	-	-	0	1	0	1	0	0	0	-	0	0	0	0	1	0	-	1	1	1	1	0	1	0	1	-	0	0	1	1	1	0	1	0	0	1	0	0	0	1	0	0	0	1
S18_2260344	18	0	1	0	1	0	0	0	1	0	1	-	0	0	1	0	0	0	-	0	0	1	1	1	1	1	0	1	0	-	0	0	0	1	-	1	0	0	1	0	1	0	0	1	1	0	0	0	-
S18_2274123	18	0	1	0	1	0	0	0	1	0	1	0	0	0	1	-	0	0	0	1	0	1	1	1	1	1	0	0	0	0	1	0	0	1	1	1	0	1	1	0	1	0	0	1	1	0	0	0	1
S18_2287985	18	0	1	0	1	0	0	0	1	0	1	0	0	0	1	1	0	0	1	1	0	1	1	1	1	1	0	1	0	1	1	0	0	0	0	1	0	1	1	0	1	0	0	1	1	0	0	0	0
S18_2290702	18	0	1	0	1	0	0	0	1	0	1	0	0	0	1	1	0	0	1	1	0	1	1	1	1	1	0	1	0	1	1	0	0	1	1	1	0	1	1	0	1	0	0	1	1	0	0	0	1
S18_2301349	18	0	1	0	1	0	0	0	1	0	0	0	0	0	0	0	0	0	0	1	0	0	1	1	1	0	0	1	0	-	0	0	0	1	0	1	0	1	1	0	1	0	0	1	1	0	0	0	1
S18_2301450	18	0	1	0	1	0	0	0	1	0	0	0	0	0	1	-	0	0	1	1	0	0	0	1	1	1	0	1	0	-	-	0	0	0	0	1	0	1	1	0	1	0	0	1	1	0	0	0	1
S18_2304465	18	0	1	0	1	0	-	0	1	0	0	0	0	0	1	-	0	0	1	1	0	-	1	1	1	1	0	0	0	-	0	0	0	1	0	1	0	1	0	0	0	-	0	1	1	0	0	0	1
S18_2305669	18	0	1	0	1	0	0	0	1	0	1	0	0	0	1	0	0	0	1	1	0	1	1	1	1	1	0	1	0	1	0	0	0	1	1	1	0	1	1	0	1	0	0	1	1	0	0	0	1
S18_2316763	18	0	1	0	1	0	0	0	1	0	1	0	0	0	1	0	0	0	1	1	0	1	1	1	1	1	0	1	0	0	1	0	0	1	1	1	0	1	1	0	1	0	0	1	1	0	0	0	1
S18_2322028	18	0	1	0	1	0	0	0	1	0	1	0	0	0	1	-	0	0	1	1	0	0	1	1	1	1	0	1	0	0	1	0	0	1	0	1	0	1	1	0	0	0	0	1	1	0	0	-	1
S18_2323227	18	0	1	0	1	0	0	0	1	0	1	0	0	0	1	0	0	0	1	1	0	1	1	1	1	1	0	1	0	1	1	0	0	1	1	1	0	1	1	0	1	0	0	1	1	0	0	0	1
S18_2374484	18	0	1	0	1	0	0	0	1	0	0	0	0	-	1	0	0	0	1	1	0	1	-	1	1	1	0	1	0	0	1	0	0	0	1	1	0	1	0	0	0	0	-	-	1	-	0	0	1
S18_2374593	18	0	1	0	1	0	0	0	1	0	1	0	0	0	1	0	0	0	1	1	0	1	1	1	1	1	0	1	0	1	1	0	0	1	1	1	0	1	1	0	1	0	0	1	1	0	0	0	1
S18_2376936	18	0	1	0	1	-	0	0	1	0	1	0	0	0	0	1	0	0	0	0	0	1	1	1	1	1	0	1	0	0	-	0	0	1	1	1	0	1	1	0	1	0	0	1	1	0	0	0	1
S18_2386476	18	0	1	0	1	0	0	0	1	0	1	0	0	0	1	-	0	0	0	1	0	0	1	1	1	1	0	1	0	0	0	0	0	1	0	1	0	1	1	0	1	0	0	1	1	-	0	0	1
S18_2387152	18	0	1	0	1	0	0	0	0	0	1	0	0	0	1	0	0	0	1	1	0	1	1	1	1	1	0	1	0	1	1	0	0	1	-	1	0	1	-	0	1	0	0	1	1	0	0	0	1
S18_2406933	18	0	1	0	1	0	0	0	1	0	1	0	0	0	1	0	0	0	1	1	0	1	1	1	1	1	0	1	0	1	1	0	0	1	1	1	0	1	0	0	1	0	0	1	1	0	0	0	1
S18_2474108	18	0	1	0	1	0	0	0	1	0	1	0	0	0	1	0	0	0	0	1	0	0	1	1	1	1	0	1	0	1	1	0	0	0	1	1	0	1	1	0	1	0	0	1	1	0	0	0	1
S18_2486987	18	0	1	0	1	0	0	0	1	0	1	0	0	0	1	1	0	0	1	1	0	1	1	1	1	1	0	1	0	1	1	0	0	1	1	1	0	1	1	0	1	0	0	1	1	0	0	0	1
S18_2526520	18	0	1	0	1	0	0	0	1	0	1	0	0	0	1	1	0	0	1	1	0	1	1	1	1	1	0	1	0	1	1	0	0	1	1	1	0	1	1	0	1	0	0	1	1	0	0	0	1
S18_2533603	18	0	1	-	1	-	-	0	1	0	1	0	0	0	0	0	-	0	0	1	0	1	1	1	1	0	0	1	0	1	0	0	0	1	0	0	0	1	1	0	1	0	0	1	1	0	0	0	1
S18_2544711	18	0	1	0	1	0	0	0	1	0	1	0	0	0	1	1	0	0	1	1	0	1	1	1	1	1	0	1	0	1	1	0	0	1	1	1	0	1	1	0	1	0	0	1	1	0	0	0	1
S18_2596298	18	0	1	0	1	0	0	0	0	0	0	0	0	0	1	0	0	0	1	1	0	0	1	1	1	1	0	1	0	0	1	0	0	1	1	1	0	1	1	0	1	0	0	1	1	0	0	0	1
S18_2651538	18	0	1	0	1	0	0	0	1	0	1	0	0	0	0	1	0	0	1	1	0	1	1	1	1	1	0	1	0	-	1	0	0	0	0	1	0	1	1	0	1	0	0	1	1	0	0	0	1
S18_2662472	18	0	1	0	1	0	0	0	1	0	1	0	0	0	1	1	0	0	1	1	0	1	1	1	1	1	0	1	0	1	1	0	0	1	1	1	0	1	1	0	1	0	0	1	1	0	0	0	1
S18_2684014	18	0	1	0	1	0	0	0	1	0	1	0	0	0	1	0	0	0	0	1	0	1	1	1	1	1	0	1	0	1	0	0	0	1	0	1	0	1	1	0	1	0	0	1	1	0	0	0	1
S18_2725453	18	-	1	0	0	0	0	0	1	0	1	0	0	0	1	0	0	0	0	1	0	1	1	1	1	1	0	1	0	-	0	0	0	1	1	1	0	1	1	0	1	0	0	1	1	0	-	-	1
S18_2735074	18	0	1	0	1	0	0	0	1	0	1	0	0	0	1	0	0	0	1	1	0	1	1	1	1	1	0	1	0	1	1	0	0	1	1	1	0	1	1	0	1	0	0	1	1	0	0	0	1
S18_2735190	18	0	1	0	1	0	0	0	1	0	1	0	0	0	1	1	0	0	1	1	0	1	1	1	1	1	0	1	0	1	1	0	0	1	1	1	0	1	1	0	1	0	0	1	1	0	0	0	1
S18_2759645	18	0	1	0	1	0	0	0	1	0	1	0	0	0	0	-	0	0	0	1	0	1	1	1	-	1	0	1	0	1	-	0	0	0	1	1	0	1	0	0	1	0	0	0	1	0	0	0	0
S18_2866064	18	0	1	0	1	0	0	0	1	0	1	0	0	0	1	0	0	0	1	1	0	1	1	1	1	1	0	1	0	1	1	0	0	0	1	1	0	1	1	0	1	0	0	1	1	0	0	0	0
S18_2897011	18	0	0	0	1	-	0	0	1	-	1	0	0	0	0	0	0	0	1	1	0	0	1	1	1	1	0	0	-	0	1	0	0	1	1	1	0	1	0	0	1	0	0	1	1	-	0	-	1
S18_2923252	18	0	1	0	1	0	-	0	1	0	1	0	0	0	1	0	0	0	1	0	0	-	1	1	1	0	0	1	0	1	1	0	0	1	0	1	0	0	-	0	1	0	0	1	1	0	0	0	1
S18_2923362	18	0	1	0	1	-	0	0	1	0	1	0	0	0	0	0	0	0	0	1	0	0	1	1	1	1	0	1	0	1	0	0	0	0	1	1	0	1	1	0	0	0	0	1	1	0	0	0	1
S18_2973957	18	0	1	0	1	0	0	0	1	0	1	0	0	0	1	1	0	0	1	1	0	1	1	1	1	1	0	1	0	1	1	0	0	1	1	1	0	1	1	0	1	0	0	1	1	0	0	0	1
S18_2978556	18	0	1	0	1	0	0	0	1	0	0	0	0	0	1	0	0	0	1	1	0	1	1	0	1	1	0	1	0	1	1	0	0	1	1	1	0	1	1	0	1	0	0	1	1	0	0	0	1
S18_2978680	18	0	1	0	1	0	-	0	1	0	1	0	0	0	0	-	0	0	1	1	0	1	1	1	1	1	0	1	0	1	1	0	0	0	0	1	0	0	0	0	1	0	0	1	1	0	0	0	1
S18_2978818	18	0	1	0	1	-	-	0	1	0	0	0	0	0	1	-	0	0	1	0	0	1	1	1	1	1	0	1	0	0	0	0	0	1	-	0	0	1	1	0	1	0	0	1	0	0	0	0	1
S18_3133983	18	0	1	0	1	0	0	0	0	0	1	0	0	0	1	0	0	0	1	1	0	1	1	1	1	1	0	0	0	1	1	0	0	1	1	1	0	1	1	0	1	0	0	0	1	0	0	0	0
S18_3197488	18	0	1	0	1	0	0	0	1	0	1	0	0	0	1	0	0	0	0	0	0	1	1	1	1	1	0	1	0	0	0	0	0	1	0	0	0	1	1	0	0	0	0	1	1	0	0	0	1
S18_3236010	18	0	1	0	1	0	0	0	1	0	1	0	0	0	1	0	-	0	0	0	0	1	1	1	1	1	0	1	0	1	0	0	0	1	1	0	0	1	1	0	1	-	0	1	1	0	0	-	1
S18_3237038	18	0	1	0	1	0	-	0	1	0	1	0	0	0	1	-	0	0	1	0	0	1	1	1	0	1	0	1	0	0	1	0	0	1	-	0	0	1	0	0	0	0	0	0	1	0	0	0	1
S18_3238202	18	0	1	0	1	0	0	0	1	0	1	0	0	0	1	0	0	0	1	0	0	1	1	1	1	1	0	0	0	0	1	0	0	1	1	0	0	1	0	0	1	0	0	1	1	0	0	0	1
S18_3266650	18	0	1	0	1	0	0	0	1	0	1	0	0	0	1	0	0	0	0	0	0	1	1	1	1	1	0	1	0	0	0	0	0	1	1	0	0	1	1	0	1	0	0	1	1	0	0	0	0
S18_3266775	18	0	1	0	1	0	-	0	1	0	1	0	0	0	1	-	-	1	1	0	0	1	1	1	1	1	0	0	0	0	1	0	0	1	1	0	0	1	1	0	1	0	0	1	1	0	1	0	0
S18_3266894	18	0	1	0	1	-	0	0	1	0	1	0	0	0	1	-	-	0	0	0	0	0	1	1	1	1	0	1	0	-	1	0	0	1	-	0	0	1	0	0	1	0	0	1	1	-	0	0	1
S18_3267715	18	0	1	0	1	0	-	0	1	0	1	0	0	0	1	0	0	0	1	0	0	1	1	1	1	1	0	1	0	1	1	0	0	1	1	0	0	1	1	0	1	0	0	1	1	0	0	0	1
S18_3322493	18	0	1	0	1	0	0	0	1	0	1	0	0	0	1	0	0	0	0	0	0	1	1	1	1	1	0	1	0	1	1	0	0	1	0	0	0	1	1	0	1	0	0	1	1	-	0	0	1
S18_3328929	18	0	1	0	1	0	0	0	1	0	1	0	0	0	1	-	0	0	1	0	0	1	1	1	1	1	0	1	0	1	1	0	0	1	1	0	0	1	1	0	1	0	0	1	1	0	0	0	1
S18_3356538	18	0	1	0	1	0	0	0	1	0	1	0	0	0	1	-	0	0	0	0	0	0	1	1	1	1	0	1	0	1	1	0	0	1	1	0	0	1	1	0	1	0	0	1	1	0	0	0	1
S18_3357561	18	0	1	0	1	0	0	0	1	0	1	0	0	0	1	1	0	0	1	0	0	1	1	1	1	1	0	1	0	1	1	0	0	1	1	0	0	1	1	0	1	0	0	1	1	0	0	0	1
S18_3367334	18	0	1	0	1	0	0	0	1	0	1	0	0	0	1	1	0	0	1	0	0	1	1	1	1	1	0	1	0	1	1	0	0	1	1	0	0	1	1	0	1	0	0	1	1	0	0	0	1
S18_3374368	18	0	1	0	1	0	0	0	1	0	1	0	0	0	1	1	0	0	1	0	0	1	1	1	1	1	0	1	0	1	1	0	0	1	1	0	0	1	1	0	1	0	0	1	1	0	0	0	1
S18_3380194	18	0	1	0	1	0	0	0	1	0	1	0	0	0	1	0	0	0	1	0	0	1	1	1	1	1	0	1	0	0	1	0	0	1	1	0	0	1	1	0	1	0	0	1	1	0	0	0	1
S18_3387151	18	0	1	0	1	0	0	0	1	0	0	0	0	0	-	-	0	0	0	0	0	1	1	1	1	1	0	0	0	-	0	0	0	1	0	0	0	1	0	0	1	0	0	1	0	0	0	0	1
S18_3407625	18	0	1	0	1	0	0	0	1	0	1	0	0	0	1	1	0	0	1	0	0	1	1	1	1	1	0	1	0	1	1	0	0	1	1	0	0	1	1	0	1	0	0	1	1	0	0	0	1
S18_3408332	18	0	1	0	1	0	0	0	1	0	1	0	0	0	0	-	0	0	0	0	0	0	1	1	1	1	0	1	0	-	1	0	0	1	1	0	0	0	1	0	1	0	0	0	1	0	0	0	1
S18_3408468	18	-	1	0	1	0	0	0	1	0	1	0	0	0	1	0	0	0	0	0	0	0	1	1	1	1	0	1	0	0	0	0	0	0	1	0	0	1	-	0	1	0	0	1	1	-	0	0	1
S18_3412279	18	0	1	0	1	0	0	0	1	0	1	0	0	0	1	1	0	0	1	0	0	1	1	1	1	1	0	1	0	1	1	0	0	1	1	0	0	1	1	0	1	0	0	1	1	0	0	0	1
S18_3412402	18	0	1	0	1	0	0	0	1	0	1	0	0	0	1	0	0	0	1	0	0	1	1	1	1	1	0	1	0	1	1	0	0	1	1	0	0	1	1	0	1	0	0	1	1	0	0	0	1
S18_3444874	18	0	1	-	1	0	0	1	1	1	-	1	0	1	1	-	-	1	1	1	1	-	1	0	0	1	1	1	0	1	-	1	-	-	0	1	1	1	1	0	0	1	1	-	1	0	0	0	0
S18_3454587	18	0	1	0	1	0	0	0	1	0	1	0	0	0	1	1	0	0	1	0	0	1	1	1	1	1	0	1	0	1	1	0	0	1	0	0	0	1	1	0	1	0	0	1	1	0	0	0	1
S18_3479366	18	0	1	0	1	0	0	0	1	0	1	0	0	0	1	0	0	0	0	0	0	0	1	1	1	1	0	1	0	0	1	0	0	1	1	0	0	1	1	0	1	0	0	1	1	0	0	0	1
S18_3511925	18	0	1	0	1	0	0	0	1	0	1	0	0	0	1	1	0	0	1	0	0	1	1	1	1	1	0	1	0	1	0	0	0	1	0	0	0	1	1	0	0	0	0	1	1	0	0	0	1
S18_3512865	18	-	1	0	1	0	0	0	1	0	1	0	0	0	1	-	0	0	0	0	0	1	1	1	1	1	0	1	0	1	1	0	0	1	1	0	0	1	1	0	1	0	0	1	1	0	0	0	1
S18_3532213	18	0	1	0	1	0	0	0	1	0	0	0	0	0	1	0	0	0	1	0	0	1	1	1	1	1	0	1	0	1	1	0	0	1	1	0	0	1	1	0	1	0	0	1	1	0	0	0	1
S18_3533530	18	0	1	0	1	0	-	0	0	0	0	0	0	0	1	1	0	0	1	0	0	1	1	1	1	1	0	1	0	0	1	0	0	0	0	0	0	1	1	0	1	0	0	1	1	0	0	0	1
S18_3547762	18	0	1	0	1	0	0	0	1	0	1	0	0	0	1	-	0	0	1	0	0	0	1	1	1	1	0	1	0	0	1	0	0	1	1	0	0	0	1	0	1	0	0	1	1	0	0	0	1
S18_3552197	18	0	1	0	1	0	0	0	0	0	0	0	0	0	1	0	0	0	0	0	0	0	1	1	1	1	0	1	0	0	1	0	0	1	1	0	0	1	1	0	1	0	0	1	1	0	0	0	0
S18_3569000	18	0	1	0	1	-	0	0	1	0	-	0	0	0	0	-	0	0	-	0	0	-	1	1	1	1	0	1	0	1	1	0	0	1	1	0	0	0	1	0	1	0	0	1	1	0	0	0	0
S18_3640163	18	0	1	0	1	-	0	0	1	0	1	0	0	0	1	0	0	0	0	0	0	1	1	1	1	1	0	1	0	1	1	0	0	1	1	0	0	1	1	0	1	0	0	1	1	0	0	0	1
	18 Average	0	0.980519	0.00671141	0.987013	0	0.00763359	0.00649351	0.941558	0.00657895	0.854305	0.00653595	0	0.00653595	0.887417	0.455357	0	0.0130719	0.682432	0.701987	0.00649351	0.793103	0.96732	0.987013	0.973856	0.96732	0.00653595	0.88961	0	0.712121	0.729167	0.00653595	0	0.849673	0.726027	0.74026	0.00649351	0.935065	0.845638	0	0.928571	0.00680272	0.00653595	0.934211	0.922078	0	0.00657895	0	0.901961
S20_280762	20	0	0	0	0	1	0	1	0	1	1	1	0	0	1	1	0	1	0	1	0	1	0	1	1	0	1	1	1	0	0	0	1	1	1	1	1	1	1	0	1	0	1	1	0	0	1	0	0
S20_487948	20	0	0	0	0	1	0	1	0	0	0	1	0	0	0	0	0	0	1	0	1	1	0	1	0	0	0	1	1	0	0	0	0	0	0	1	1	1	0	0	0	0	1	1	0	0	0	1	1
S20_558087	20	0	0	0	0	1	0	1	0	1	1	1	0	0	1	1	0	1	0	1	0	0	0	1	1	0	1	1	1	0	0	0	1	1	1	1	1	1	1	0	1	0	1	1	0	0	0	0	0
S20_606002	20	0	0	0	0	1	0	1	0	1	1	1	0	0	1	1	0	1	0	1	0	0	0	1	1	0	1	1	1	0	0	0	1	1	1	1	1	1	1	0	1	0	1	1	0	0	0	0	0
S20_609059	20	0	0	0	0	0	0	1	0	1	1	1	0	0	1	1	0	1	0	1	0	1	0	1	1	0	0	1	1	0	0	0	0	1	1	1	1	0	1	0	1	0	1	1	0	0	0	0	0
S20_764157	20	0	0	0	0	1	-	0	0	1	1	1	0	0	1	-	0	0	0	0	0	0	0	1	1	0	1	1	1	0	0	0	0	1	1	1	1	1	1	0	1	0	1	1	0	0	0	0	0
S20_765501	20	0	0	0	0	0	0	1	0	1	1	1	0	0	1	0	0	1	0	1	0	0	0	1	1	0	1	0	1	0	0	0	1	1	1	1	1	1	1	0	1	0	1	1	0	0	0	0	0
S20_812809	20	0	0	0	0	-	-	0	0	0	1	1	0	0	1	-	0	1	0	1	0	1	0	1	1	0	1	1	1	0	0	0	1	1	1	1	1	1	0	0	1	0	1	1	0	0	0	0	0
S20_955720	20	0	0	0	1	1	0	1	0	1	1	1	0	1	1	0	0	1	0	0	1	0	0	1	1	0	1	1	1	0	0	0	1	0	1	1	1	1	1	0	1	0	0	1	1	0	0	0	0
S20_983169	20	0	0	0	0	0	0	1	0	0	1	1	0	0	1	0	0	0	0	1	0	0	0	1	1	0	1	0	1	0	0	0	0	0	1	0	1	1	1	0	1	0	1	1	0	0	1	0	0
S20_1001446	20	0	0	0	0	1	0	1	0	1	1	1	0	0	1	1	0	1	0	1	0	1	0	1	1	0	1	1	1	0	0	0	1	1	1	1	1	1	1	0	1	0	1	1	0	0	0	0	0
S20_1024760	20	0	0	0	0	1	0	1	0	1	1	1	0	0	1	-	0	1	0	1	0	1	0	1	1	0	1	1	1	0	0	0	1	1	1	1	1	1	1	0	1	0	1	1	0	0	0	0	0
S20_1082657	20	0	0	0	0	1	0	1	0	1	1	1	0	0	1	1	0	1	0	1	0	0	0	1	1	0	1	1	1	0	0	0	1	0	0	0	1	1	1	0	1	0	1	1	0	0	0	0	0
S20_1108985	20	0	0	0	0	0	0	1	0	1	1	1	0	0	1	0	0	1	0	1	0	0	0	1	1	0	1	1	1	0	0	0	1	1	1	1	1	1	1	0	1	0	1	1	0	0	0	0	0
S20_1128519	20	0	0	0	0	1	0	1	0	0	1	1	0	0	1	-	0	1	0	1	0	0	0	1	1	0	1	1	1	0	0	0	1	1	-	1	1	1	1	0	1	0	1	1	0	0	0	0	0
S20_1202050	20	0	0	0	0	1	0	1	0	1	1	1	0	0	0	1	0	1	0	1	0	0	0	1	1	0	1	1	1	0	0	0	1	1	1	1	1	1	1	0	1	0	1	1	0	0	0	0	0
S20_1220818	20	0	0	0	0	-	0	0	0	1	1	1	0	0	1	0	0	1	0	1	0	1	0	1	1	0	1	1	1	0	0	0	1	1	1	1	1	1	1	0	1	0	1	1	0	0	0	0	0
S20_1220971	20	0	0	0	0	1	0	1	0	1	1	1	0	0	1	0	0	1	0	1	0	1	0	1	1	0	1	1	1	0	0	0	1	1	1	1	1	1	1	0	1	0	1	1	0	-	0	0	0
S20_1221071	20	0	0	0	0	-	0	1	0	1	1	1	0	0	1	-	0	1	0	1	0	0	0	1	1	0	1	1	0	1	0	0	1	1	1	1	1	1	0	0	1	0	1	1	0	0	0	0	0
S20_1296042	20	0	0	0	0	-	0	1	0	1	1	1	0	0	1	1	0	1	0	1	0	0	0	1	1	0	1	1	1	0	0	0	1	1	1	1	1	0	1	0	1	0	1	1	0	0	0	0	0
S20_1352686	20	0	0	0	0	-	0	1	0	1	1	1	0	0	1	0	0	1	0	1	0	1	0	1	1	0	1	1	1	0	0	0	1	1	1	1	1	1	1	0	1	0	1	1	0	0	0	0	0
S20_1384029	20	0	0	0	0	1	0	1	0	1	1	1	0	0	1	1	0	1	0	1	0	1	0	1	1	0	1	1	1	0	0	0	1	1	1	1	1	1	1	0	1	0	1	1	0	0	0	0	0
S20_1499080	20	0	0	0	0	0	0	1	0	1	1	1	0	0	1	1	0	1	0	1	0	1	0	1	1	0	1	1	1	0	0	0	1	1	1	1	1	1	1	0	1	0	1	1	1	0	0	0	0
	20 Average	0	0	0	0.0434783	0.722222	0	0.869565	0	0.826087	0.956522	1	0	0.0434783	0.913043	0.555556	0	0.869565	0.0434783	0.869565	0.0869565	0.478261	0	1	0.956522	0	0.913043	0.913043	0.956522	0.0434783	0	0	0.826087	0.826087	0.909091	0.913043	1	0.913043	0.869565	0	0.956522	0	0.956522	1	0.0869565	0	0.0869565	0.0434783	0.0434783
S22_219978	22	0	1	0	1	0	-	0	1	1	0	0	0	1	0	-	0	1	0	0	0	1	0	0	0	0	1	0	1	1	0	0	0	0	0	1	1	0	0	1	1	0	0	0	0	-	1	0	0
S22_355300	22	1	1	0	1	0	1	0	1	1	0	0	0	1	0	0	0	1	0	0	0	1	0	0	0	0	1	0	1	1	0	0	0	0	0	1	1	0	0	1	1	0	0	0	0	1	1	0	0
S22_435308	22	1	1	0	1	0	1	0	1	1	0	0	0	1	0	0	0	1	0	0	0	1	0	0	0	0	1	0	1	1	0	0	0	0	0	1	1	0	0	1	1	0	0	0	0	1	1	0	0
	22 Average	0.666667	1	0	1	0	1	0	1	1	0	0	0	1	0	0	0	1	0	0	0	1	0	0	0	0	1	0	1	1	0	0	0	0	0	1	1	0	0	1	1	0	0	0	0	1	1	0	0
S23_66259	23	0	0	0	0	1	1	1	1	0	0	0	0	0	0	1	1	0	0	1	0	1	0	0	0	0	0	1	0	1	1	1	0	1	0	0	0	1	1	0	0	0	0	0	0	1	0	0	0
S23_103906	23	0	0	0	0	0	1	1	0	0	0	0	0	0	0	0	1	0	0	1	0	0	0	0	0	0	0	1	0	1	1	1	0	1	0	0	0	1	1	0	0	0	0	0	0	0	0	0	0
S23_145150	23	0	1	1	1	-	0	0	0	1	0	0	1	0	0	-	0	1	0	1	0	0	1	1	-	0	1	0	0	0	1	0	0	1	0	1	1	1	0	1	-	0	0	0	1	-	1	1	0
S23_171056	23	0	0	0	0	1	1	1	1	0	0	0	0	0	0	0	0	0	0	1	0	1	0	0	0	0	0	1	0	0	1	1	0	1	0	0	0	1	1	0	0	0	0	0	0	1	0	0	0
S23_182526	23	0	0	0	0	1	0	1	1	0	0	0	0	0	0	1	1	0	0	1	0	1	0	0	0	0	0	1	0	0	0	1	0	1	0	0	0	0	0	0	0	0	0	0	0	1	0	0	0
S23_191645	23	0	0	0	0	1	0	1	1	0	0	0	0	0	0	0	0	0	0	1	0	1	0	0	0	0	0	1	0	0	1	1	0	1	0	0	0	1	1	0	0	0	0	0	0	1	0	0	0
S23_196996	23	0	0	0	0	0	1	1	1	0	0	0	0	0	0	0	1	0	0	1	0	1	0	0	0	0	0	1	0	1	1	1	0	1	0	0	0	1	1	0	0	0	0	0	0	1	0	0	0
S23_198710	23	0	0	0	0	1	1	1	1	0	0	0	0	0	0	0	0	0	0	1	0	1	0	0	0	0	0	1	0	1	1	1	0	1	0	0	0	1	1	0	0	0	0	0	0	1	0	0	0
S23_213354	23	0	0	0	0	1	1	1	1	0	0	0	0	0	0	0	1	0	0	1	0	1	0	0	0	0	0	1	0	1	1	1	0	1	0	0	0	1	1	0	0	0	0	0	0	1	0	0	0
S23_230532	23	0	0	0	0	0	0	1	1	0	0	0	0	0	0	1	1	0	0	1	0	1	0	0	0	0	0	1	0	1	1	1	0	1	0	0	0	1	1	0	0	0	0	0	0	1	0	0	0
S23_252836	23	0	0	0	0	1	0	1	1	0	0	0	0	0	0	1	0	0	0	1	0	1	0	0	0	0	0	1	0	1	1	1	0	0	0	0	0	1	1	0	0	0	0	0	0	-	0	0	0
S23_252969	23	0	0	0	0	1	1	1	1	0	0	0	0	0	0	1	1	0	0	1	0	1	0	0	0	0	0	1	0	1	1	1	0	1	0	0	0	1	1	0	0	0	0	0	0	1	0	0	0
S23_281638	23	1	1	0	1	-	0	0	1	1	0	1	0	1	0	1	0	1	0	1	0	1	0	0	1	0	1	1	1	0	0	0	0	1	0	1	1	0	0	1	1	1	0	0	0	0	1	0	0
S23_283396	23	0	1	0	1	0	1	0	1	0	0	1	0	1	-	0	0	1	0	0	0	1	0	0	1	0	0	0	0	1	0	0	0	0	0	0	0	0	0	1	1	1	0	0	0	1	1	0	0
S23_288669	23	0	0	0	0	0	1	1	0	0	0	0	0	0	0	1	1	0	0	1	0	1	0	0	0	0	0	1	0	1	1	1	0	1	0	0	0	1	1	0	0	0	0	0	0	1	0	0	0
S23_288780	23	0	0	0	0	0	0	1	1	0	0	0	0	0	0	0	1	0	0	1	0	1	0	0	0	0	0	0	0	1	1	1	0	1	0	0	0	1	1	0	0	0	0	0	0	0	0	0	0
S23_288908	23	0	0	0	0	1	1	1	1	0	0	0	0	0	0	1	1	0	0	1	0	1	0	0	0	0	0	1	0	1	1	1	0	1	0	0	0	1	1	0	0	0	0	0	0	1	0	0	0
S23_290402	23	0	0	0	0	0	0	1	1	0	0	0	0	0	0	1	1	0	0	1	0	0	0	0	0	0	0	1	0	0	1	1	0	1	0	0	0	1	1	0	0	0	0	0	0	1	0	0	0
S23_300760	23	0	0	0	0	1	1	1	1	0	0	0	0	0	0	1	1	0	0	1	0	1	0	0	0	0	0	1	0	1	1	1	0	1	0	0	0	1	1	0	0	0	0	0	0	1	0	0	0
S23_337316	23	0	0	0	0	1	1	1	1	0	0	0	0	0	0	0	1	0	0	1	0	1	0	0	0	0	0	1	0	1	1	1	0	1	0	0	0	1	1	0	0	0	0	0	0	1	0	0	0
S23_368580	23	0	0	0	0	1	1	1	1	0	0	0	0	0	0	1	1	0	0	1	0	1	0	0	0	0	0	1	0	1	1	1	0	1	0	0	0	1	1	0	0	0	0	0	0	1	0	0	0
S23_385964	23	0	0	0	0	0	1	1	1	0	0	0	0	0	0	0	1	0	0	1	0	1	0	0	0	0	0	1	0	1	1	1	0	1	0	0	0	1	1	0	0	0	0	0	0	1	0	0	0
S23_392435	23	0	0	0	0	-	1	1	1	0	0	0	0	0	0	0	0	0	0	1	0	1	0	0	0	0	0	1	0	1	0	0	0	1	0	0	0	1	1	0	0	0	0	0	0	1	0	0	0
S23_442984	23	0	0	0	0	0	-	1	1	0	0	0	0	0	0	0	1	0	0	1	0	1	0	0	0	0	0	1	0	0	1	1	0	1	0	0	0	1	1	0	0	0	0	0	0	1	0	0	0
S23_640120	23	0	1	0	0	0	0	1	1	0	0	0	0	0	0	-	1	0	0	1	0	1	0	0	0	0	0	1	0	1	1	1	0	1	0	0	0	1	1	0	0	0	0	0	0	1	0	0	0
S23_640248	23	0	1	0	0	1	1	1	1	0	0	0	0	0	0	-	1	0	0	0	0	0	0	0	0	0	0	1	0	0	1	1	0	1	0	0	0	1	1	0	0	0	0	0	0	0	0	0	0
S23_656594	23	0	1	0	0	1	1	1	1	0	0	0	0	0	0	1	1	0	0	1	0	1	0	0	0	0	0	1	0	1	1	1	0	1	0	0	0	1	1	0	0	0	0	0	0	1	0	0	0
S23_666680	23	0	1	0	0	1	1	1	1	0	0	0	0	0	0	-	1	0	0	1	0	1	0	0	0	0	0	1	0	1	1	1	0	1	0	0	0	1	1	0	0	0	0	0	0	1	0	0	0
S23_668396	23	0	1	0	0	-	1	1	1	0	0	0	0	0	0	-	0	0	-	1	0	1	0	0	0	0	0	1	0	-	1	1	0	1	0	0	0	1	1	0	0	0	0	0	0	1	0	0	0
S23_688643	23	0	1	0	0	1	1	1	1	0	0	0	0	0	0	0	1	0	0	1	0	1	0	0	0	0	0	1	0	1	1	1	0	1	0	0	0	1	1	0	0	0	0	0	0	1	0	0	0
S23_720817	23	0	1	0	0	1	0	1	1	0	0	0	0	0	0	0	1	0	0	1	0	1	0	0	0	0	0	1	0	1	1	1	0	1	0	0	0	1	1	0	0	0	0	0	0	1	0	0	0
S23_722826	23	0	1	0	0	1	1	1	1	0	0	0	0	0	0	1	1	0	0	1	0	1	0	0	0	0	0	1	0	1	1	1	0	1	0	0	0	1	1	0	0	0	0	0	0	1	0	0	0
S23_766864	23	0	1	0	0	1	-	1	1	0	0	0	0	0	0	1	1	0	0	1	0	1	0	0	0	0	0	1	0	1	1	1	0	1	0	0	0	1	1	0	0	0	0	0	0	1	0	0	0
S23_767159	23	0	1	0	0	1	1	1	1	0	0	0	0	0	0	1	1	0	0	1	0	1	0	0	0	0	0	1	0	1	1	1	0	1	0	0	0	1	1	0	0	0	0	0	0	1	0	0	0
S23_767337	23	0	1	0	0	1	1	1	1	0	0	0	0	0	0	1	1	0	0	1	0	1	0	0	0	0	0	1	0	1	1	1	0	1	0	0	0	1	1	0	0	0	0	0	0	1	0	0	0
S23_799605	23	0	1	0	0	0	1	1	0	0	0	0	0	0	0	0	1	0	0	1	0	1	0	0	0	0	0	1	0	0	1	1	0	1	0	0	0	1	1	0	0	0	0	0	0	1	0	0	0
S23_799732	23	0	1	0	0	0	0	1	1	0	0	0	0	0	0	0	1	0	0	1	0	1	0	0	0	0	0	0	0	1	1	1	0	1	0	0	0	1	1	0	0	0	0	0	0	0	0	0	0
S23_799841	23	0	1	0	0	0	1	1	0	0	0	0	0	0	0	1	1	0	0	1	0	1	0	0	0	0	0	1	0	1	1	1	0	1	0	0	0	1	1	0	0	0	0	0	0	0	0	0	0
S23_859010	23	-	1	1	1	-	0	0	0	1	1	1	1	1	1	-	-	1	1	1	1	1	1	0	0	0	1	-	1	1	0	0	1	1	1	1	1	0	1	1	1	1	1	0	1	0	1	0	1
S23_861452	23	1	1	1	1	-	-	0	1	1	1	1	0	1	0	0	-	1	1	0	1	0	1	1	1	1	0	-	1	-	-	1	1	-	-	0	1	0	-	1	1	1	0	1	1	-	-	-	1
	23 Average	0.0512821	0.475	0.075	0.125	0.617647	0.675676	0.875	0.85	0.1	0.05	0.1	0.05	0.1	0.025641	0.5	0.763158	0.125	0.0512821	0.925	0.05	0.875	0.075	0.05	0.0769231	0.025	0.075	0.894737	0.075	0.763158	0.871795	0.875	0.05	0.948718	0.025641	0.075	0.1	0.875	0.897436	0.125	0.102564	0.1	0.025	0.025	0.075	0.810811	0.102564	0.025641	0.05
S26_115520	26	0	1	0	1	0	1	0	-	0	1	0	0	1	1	0	0	0	1	1	0	1	0	1	0	0	0	0	0	0	1	1	0	0	0	0	1	0	0	0	1	0	0	1	0	0	1	0	1
S26_259856	26	0	1	0	1	0	1	1	0	0	1	1	0	1	1	0	0	0	1	1	0	1	0	1	1	0	1	0	1	0	1	1	0	0	0	0	1	0	0	0	1	0	0	1	0	0	1	0	1
S26_260182	26	0	1	0	1	0	1	1	0	0	1	1	0	1	1	0	0	0	1	1	0	1	0	1	1	0	1	0	1	0	1	1	0	0	0	0	1	0	0	0	1	0	0	1	0	0	1	0	1
S26_260321	26	0	1	0	1	0	0	1	0	0	1	1	0	1	1	-	0	0	1	1	0	1	0	1	1	0	1	0	1	0	1	0	0	0	0	0	1	0	0	0	0	0	0	1	0	0	1	0	1
S26_272781	26	0	1	0	1	0	0	1	0	0	1	1	0	0	1	0	0	0	-	1	0	1	0	1	1	0	1	0	0	0	-	1	0	0	0	0	0	0	0	0	0	0	0	1	0	0	1	0	1
S26_275230	26	0	1	0	1	0	1	1	0	0	1	1	0	1	1	0	0	0	1	1	0	1	0	1	1	0	1	0	1	0	1	1	0	0	0	0	1	0	0	0	1	0	0	1	0	0	1	0	1
S26_275698	26	0	1	0	1	0	0	1	0	0	1	1	0	1	1	-	-	0	1	1	0	1	0	1	1	0	1	0	1	-	-	1	0	0	-	0	1	0	0	0	1	0	0	1	0	0	0	0	1
S26_298296	26	0	1	0	1	0	0	1	0	0	1	0	0	1	1	0	0	0	1	1	0	0	0	1	1	0	0	0	1	0	1	1	0	0	0	0	1	0	0	0	1	0	0	1	0	-	1	0	1
S26_382714	26	0	1	0	1	0	0	1	0	0	1	1	0	0	1	0	0	0	1	1	0	1	0	1	1	0	1	0	1	0	1	1	0	0	0	0	1	0	0	0	1	0	0	1	0	0	1	0	1
S26_428229	26	0	0	-	1	0	-	1	1	1	0	1	0	1	0	-	0	0	-	0	0	1	0	1	0	0	1	1	1	0	1	0	0	0	0	0	0	1	0	0	1	-	0	0	0	-	0	0	0
S26_446495	26	0	1	0	1	0	1	1	0	0	1	1	0	1	1	0	0	0	1	1	0	1	0	1	1	0	1	0	1	0	1	1	0	0	0	0	1	0	0	0	1	0	0	1	0	0	1	0	1
S26_451675	26	-	1	0	1	0	-	1	0	0	0	1	0	1	0	0	0	0	1	1	0	0	0	1	1	0	1	0	1	-	1	1	-	0	0	0	0	0	0	0	1	0	1	1	0	0	1	0	1
S26_507194	26	0	1	0	1	0	1	1	0	0	1	0	0	1	1	0	0	0	1	1	0	1	0	1	1	0	0	0	1	0	1	1	0	0	0	0	1	0	0	0	1	0	0	1	0	0	1	0	1
S26_525720	26	0	1	0	1	0	1	1	0	0	1	0	0	0	1	0	0	0	1	1	0	1	0	1	1	0	0	0	1	0	1	1	0	0	0	0	1	0	0	0	1	0	0	1	0	0	1	0	1
S26_665935	26	0	1	0	1	0	-	1	0	0	1	1	0	1	1	0	0	0	1	1	0	0	0	1	0	0	1	-	0	0	1	1	0	0	0	0	1	0	0	0	1	0	1	1	0	0	0	0	1
S26_667020	26	0	1	0	1	0	1	1	0	0	1	1	0	1	1	0	0	0	1	1	0	1	0	1	1	0	1	0	1	0	1	1	0	0	0	0	1	0	0	0	1	0	0	1	0	0	1	0	1
S26_680819	26	0	1	0	1	0	1	1	0	0	1	1	0	1	1	0	0	0	1	1	0	1	0	1	1	0	1	0	1	0	1	1	0	0	0	0	1	0	0	0	1	0	0	1	0	0	1	0	1
S26_715883	26	0	1	0	1	0	-	1	0	0	0	1	0	0	1	0	0	0	1	1	0	1	0	1	1	0	1	0	1	0	1	1	0	0	0	0	1	0	0	0	1	0	0	1	0	0	1	0	1
S26_783225	26	0	1	0	1	0	1	1	0	0	1	1	0	1	1	0	0	0	1	1	0	1	0	1	1	0	1	0	1	0	1	0	0	0	0	0	1	0	0	0	1	0	0	1	0	0	1	0	1
S26_836268	26	0	1	0	1	0	1	1	0	0	1	1	0	1	1	0	0	0	1	1	0	1	0	1	1	0	1	0	1	0	1	0	0	0	0	0	1	0	0	0	1	0	0	1	0	0	1	0	1
S26_838935	26	0	1	0	1	0	1	1	0	0	1	1	0	1	1	0	0	0	1	1	0	1	0	1	1	0	1	0	1	0	1	0	0	0	0	0	1	0	0	0	1	0	0	1	0	0	1	0	1
S26_846068	26	0	1	0	1	-	0	1	0	0	0	0	0	0	1	-	0	0	0	1	0	1	0	1	1	0	0	0	1	0	1	0	0	0	0	0	1	0	0	0	1	0	0	1	0	0	1	0	1
S26_924096	26	0	1	0	1	0	1	1	0	0	1	1	0	1	1	0	0	0	1	1	0	1	0	1	1	0	1	0	1	0	1	0	0	0	0	0	1	0	0	0	1	0	0	1	0	0	1	0	1
S26_952919	26	1	1	0	1	1	-	1	1	1	0	0	1	1	1	-	1	1	1	-	1	1	1	1	1	1	-	1	1	0	1	1	1	0	0	1	1	0	1	0	0	1	1	1	1	0	0	1	-
S26_1022229	26	0	1	-	1	-	-	0	1	0	0	0	0	0	1	-	0	1	0	0	1	-	1	0	0	1	0	1	0	1	0	1	1	-	0	1	1	1	1	1	1	0	1	0	0	0	0	1	1
S26_1050584	26	0	1	0	1	-	0	1	0	0	1	0	0	1	1	0	0	0	0	1	0	1	0	1	1	0	0	0	1	0	-	0	0	0	0	0	1	0	0	0	1	0	0	1	0	0	1	0	1
S26_1075253	26	0	1	0	1	0	0	1	0	0	1	1	0	1	1	-	0	0	1	0	0	1	0	1	1	0	1	0	1	0	0	0	0	0	0	0	1	0	0	0	1	0	0	1	0	0	1	0	1
S26_1076677	26	0	1	0	1	-	0	1	0	0	1	1	0	1	1	-	0	0	1	1	0	1	0	1	1	0	1	0	1	0	1	0	0	0	0	0	1	0	0	0	0	0	0	1	0	0	1	0	1
S26_1076788	26	0	1	0	1	0	0	0	0	0	0	1	0	1	1	0	0	0	0	1	0	0	0	1	1	0	1	0	1	0	-	0	0	0	0	0	1	0	0	0	1	0	0	1	0	-	0	0	1
S26_1127510	26	0	1	0	1	0	1	1	0	0	1	1	0	1	1	0	0	0	1	1	0	1	0	1	1	0	1	0	1	0	1	0	0	0	0	0	1	0	0	0	1	0	0	1	0	0	1	0	1
S26_1130165	26	0	1	0	1	0	0	1	0	0	-	1	0	1	1	0	0	0	0	0	0	1	0	1	1	0	1	0	1	0	1	0	0	0	0	0	1	0	0	0	1	0	0	1	0	0	1	0	1
S26_1130284	26	0	1	0	1	0	0	1	0	0	1	1	0	1	1	-	0	0	1	0	0	1	0	1	1	0	1	0	1	0	1	0	0	0	0	0	1	0	0	0	1	0	1	1	0	0	1	0	1
S26_1154121	26	0	1	0	1	-	-	1	0	0	1	0	0	1	1	-	0	0	1	1	0	1	0	1	1	0	0	0	1	0	0	0	0	0	0	0	1	0	0	0	1	0	1	1	0	0	1	0	0
S26_1207319	26	0	1	0	1	0	0	1	0	0	1	1	0	1	1	-	0	0	1	1	0	1	0	1	1	0	1	0	1	0	1	0	0	0	0	0	0	0	0	0	0	0	0	1	0	0	1	0	1
S26_1207419	26	0	1	0	1	0	1	0	0	0	1	1	0	1	0	0	0	0	1	1	0	1	0	1	1	0	1	0	1	0	1	0	0	0	0	0	1	0	0	0	1	0	0	1	0	0	1	0	1
S26_1238087	26	0	1	0	1	0	0	1	0	0	1	1	0	1	1	0	0	0	1	1	0	1	0	1	1	0	1	0	1	0	1	0	0	0	0	0	1	0	0	0	1	0	0	1	0	0	1	0	1
S26_1269608	26	0	1	0	1	-	1	1	0	0	1	1	0	1	1	0	0	0	1	0	0	1	0	1	1	0	1	0	1	0	0	0	0	0	0	0	1	0	0	0	1	0	0	1	0	0	1	0	1
S26_1310962	26	0	1	0	1	0	1	1	0	0	1	1	0	1	1	0	0	0	1	1	0	1	0	1	1	0	1	0	1	0	1	0	0	0	0	0	1	0	0	0	1	0	0	1	0	0	1	0	1
S26_1313057	26	0	1	0	1	0	1	1	0	0	1	1	0	1	1	0	0	0	1	1	0	1	0	1	1	0	1	0	1	0	1	0	0	0	0	0	1	0	0	0	1	0	0	1	0	0	1	0	1
S26_1352787	26	0	1	0	1	0	1	1	0	0	1	1	0	1	1	0	0	0	1	1	0	1	0	1	1	0	1	0	1	0	1	0	0	0	0	0	1	0	0	0	1	0	0	1	0	0	1	0	1
S26_1364305	26	0	1	0	1	0	-	1	0	0	1	1	0	1	1	-	0	0	0	1	0	1	0	1	1	0	1	0	1	0	0	0	0	0	0	0	1	0	0	0	1	0	0	1	0	0	0	0	1
S26_1444797	26	0	1	0	1	0	1	1	0	0	1	0	0	1	1	0	0	0	1	1	0	0	0	1	1	0	0	0	1	0	0	0	0	0	0	0	1	0	0	0	0	0	0	1	0	0	1	0	1
S26_1466155	26	0	1	0	1	0	0	1	0	0	1	1	0	1	1	0	0	0	0	1	0	1	0	1	1	0	1	0	1	0	0	0	0	0	0	0	1	0	0	0	1	0	0	1	0	0	1	0	1
S26_1528491	26	0	1	0	1	0	0	1	0	0	1	1	0	0	1	0	0	0	0	1	0	1	0	1	1	0	1	0	1	0	1	0	0	0	0	0	1	0	0	0	1	0	0	1	0	0	1	0	1
S26_1528596	26	0	1	0	1	0	1	1	0	0	1	1	0	1	1	0	0	0	1	1	0	1	0	1	0	0	1	0	1	-	1	0	0	0	0	0	1	0	0	0	1	0	0	1	0	0	1	0	1
S26_1869630	26	0	1	0	1	0	1	1	0	0	1	1	0	1	1	0	0	0	1	1	0	1	0	1	1	0	1	0	1	0	1	0	0	0	0	0	1	0	0	0	1	0	0	1	0	0	1	0	1
S26_1898880	26	0	1	0	1	-	1	1	0	0	1	1	0	1	1	0	0	0	1	1	0	1	0	1	1	0	1	0	1	0	1	0	1	0	0	0	1	0	0	0	1	0	0	1	0	0	1	0	1
S26_1907670	26	0	1	0	1	0	1	1	0	0	1	1	0	1	1	0	0	0	1	1	0	1	0	1	1	0	1	0	1	0	1	0	0	0	0	0	1	0	0	0	1	0	0	1	0	0	1	0	1
S26_1907781	26	0	1	0	1	0	0	1	0	0	0	1	0	1	1	0	0	0	1	1	0	1	0	1	0	0	1	0	1	0	-	0	0	0	0	0	1	0	0	0	1	0	0	1	0	0	1	0	1
S26_1971261	26	0	1	0	1	0	1	1	0	0	1	1	0	1	1	0	0	0	1	0	0	1	0	1	1	0	1	0	1	0	1	0	0	0	0	0	1	0	0	0	1	0	0	1	0	0	1	0	1
S26_1986163	26	0	1	0	1	0	0	1	0	0	1	0	0	0	1	0	0	0	0	1	0	0	0	1	0	0	1	0	1	0	-	0	0	0	0	0	1	0	0	0	1	0	0	1	0	0	1	0	1
S26_1986265	26	0	1	0	1	0	0	1	0	0	0	1	0	1	1	0	0	0	1	1	0	0	0	1	1	0	1	0	0	0	0	0	0	0	0	0	1	0	0	0	1	0	0	1	0	0	1	0	1
S26_2062773	26	0	1	0	1	0	0	1	0	0	1	1	0	1	1	0	0	0	1	1	0	1	0	1	1	0	1	0	1	0	1	0	0	0	0	0	1	0	0	0	1	0	0	1	0	0	1	0	1
S26_2206887	26	0	1	0	1	0	1	1	0	0	1	0	0	1	1	0	0	0	0	0	0	1	0	1	1	0	0	0	1	0	1	0	0	0	0	0	0	0	0	0	1	0	0	1	0	-	1	0	1
S26_2208036	26	0	1	0	1	0	1	1	0	0	1	1	0	1	1	0	0	0	1	1	0	1	0	1	1	0	1	0	1	0	1	0	0	0	0	0	1	0	0	0	0	0	0	1	0	0	1	0	1
S26_2230098	26	0	1	0	1	0	1	1	0	0	1	1	0	1	1	0	0	0	0	1	0	1	0	1	1	0	1	0	1	0	1	0	-	0	-	0	1	0	0	0	1	0	0	1	0	0	1	0	1
S26_2230248	26	0	1	0	1	0	-	0	0	0	1	1	0	1	1	-	0	0	0	1	0	1	0	1	1	0	1	0	1	0	0	0	0	0	0	0	1	0	0	0	1	0	0	1	0	0	1	0	1
S26_2230360	26	0	1	0	1	-	1	0	0	0	0	0	0	0	0	-	0	0	0	1	0	1	0	1	0	0	0	0	1	0	1	0	0	0	0	0	1	0	0	0	1	0	0	1	0	0	1	0	1
S26_2275243	26	0	1	0	1	0	1	1	0	0	1	1	0	1	1	0	0	0	1	1	0	1	0	1	1	0	1	0	1	1	1	0	0	0	0	0	1	0	0	0	1	0	0	1	0	0	1	0	1
S26_2275634	26	0	1	0	1	0	1	1	0	0	1	1	0	1	1	0	0	0	1	1	0	1	0	1	1	0	1	0	1	1	1	0	0	0	0	0	0	0	0	0	1	0	0	0	0	0	1	0	1
	26 Average	0.0169492	0.983333	0	1	0.0192308	0.607843	0.9	0.0508475	0.0333333	0.830508	0.783333	0.0166667	0.85	0.933333	0	0.0169492	0.0333333	0.775862	0.864407	0.0333333	0.881356	0.0333333	0.983333	0.866667	0.0333333	0.813559	0.0508475	0.916667	0.0526316	0.833333	0.3	0.0517241	0	0	0.0333333	0.9	0.0333333	0.0333333	0.0166667	0.883333	0.0169492	0.1	0.95	0.0166667	0	0.883333	0.0333333	0.966102
S27_2785	27	0	1	0	1	1	1	1	0	0	1	1	0	0	0	0	0	0	1	1	0	1	0	1	1	0	1	0	1	0	1	1	0	0	1	1	0	0	0	0	1	0	0	1	0	0	1	0	1
S27_2900	27	0	1	0	1	1	-	1	0	0	0	1	0	1	1	-	0	0	0	-	0	1	0	1	1	0	1	0	1	-	1	1	0	0	1	1	0	0	0	0	1	0	0	0	0	-	1	0	0
S27_3324	27	0	1	0	1	1	0	1	0	0	1	1	0	1	1	-	0	0	1	1	0	1	0	1	1	0	1	0	1	0	1	1	0	0	1	1	0	0	0	0	1	0	0	1	0	0	1	0	1
S27_7502	27	0	1	0	1	0	1	1	0	0	1	1	0	1	1	0	0	0	1	1	0	1	0	1	1	0	1	0	1	0	1	1	0	0	1	1	0	0	0	0	1	0	0	1	0	0	1	0	1
S27_15353	27	0	1	0	1	-	1	1	0	0	1	1	0	1	0	0	0	0	1	0	0	0	0	1	0	0	1	0	1	0	-	1	0	0	0	1	0	0	0	0	1	0	0	1	0	0	1	0	1
S27_40265	27	0	1	0	1	1	1	1	0	0	1	1	0	1	1	0	0	0	1	1	0	1	0	1	1	0	1	0	1	0	0	1	0	0	1	1	0	0	0	0	1	0	0	1	0	0	1	0	1
S27_43434	27	0	1	0	1	1	1	1	0	0	1	1	0	1	1	0	0	0	1	1	0	1	0	1	1	0	1	0	1	0	1	1	0	0	1	1	0	0	0	0	1	0	0	1	0	0	1	0	1
S27_43651	27	0	1	0	1	0	1	1	0	0	1	0	0	1	1	0	0	0	0	1	0	1	0	1	1	0	1	0	0	0	0	1	0	0	1	1	0	0	0	0	1	0	0	1	0	0	1	0	1
S27_46599	27	0	1	0	1	1	1	1	0	0	1	1	0	1	1	0	0	0	1	1	0	1	0	1	1	0	1	0	1	0	1	1	0	0	1	1	0	0	0	0	1	0	0	1	0	0	1	0	1
S27_48657	27	0	1	0	1	0	0	1	0	0	1	0	0	1	1	0	0	0	1	1	0	1	0	1	0	0	0	0	1	0	1	1	0	0	0	0	0	0	0	0	0	0	0	0	0	0	1	0	1
S27_49017	27	0	1	0	1	1	0	1	0	0	1	1	0	1	1	0	0	0	0	1	0	1	0	1	1	0	1	0	1	0	1	1	0	0	1	1	0	0	0	0	1	0	0	1	0	0	1	0	1
S27_50063	27	0	1	0	1	-	1	1	0	0	1	1	0	1	0	-	0	0	1	0	0	1	0	1	1	0	1	0	1	0	1	1	0	0	1	1	0	0	0	0	1	0	0	1	0	0	1	0	1
S27_52902	27	0	1	0	1	1	-	1	0	0	1	1	0	0	0	0	0	0	1	1	0	1	0	1	0	0	1	0	1	0	1	1	0	0	1	1	0	0	0	0	1	0	0	1	0	0	1	0	1
S27_92970	27	0	1	0	1	1	1	1	0	0	1	1	0	1	1	0	0	0	1	1	0	1	0	1	1	0	1	0	1	0	1	1	0	0	1	1	0	0	0	0	1	0	0	1	0	0	1	0	1
S27_96056	27	0	1	0	1	1	1	1	0	0	1	1	0	1	1	0	0	0	1	1	0	1	0	1	1	0	1	0	1	0	0	1	0	0	1	1	0	0	0	0	1	0	0	1	0	0	1	0	1
S27_99307	27	0	1	0	1	1	1	1	0	0	1	1	0	1	1	0	0	0	0	1	0	1	0	1	1	0	1	0	1	0	1	1	0	0	1	1	0	0	0	0	1	0	0	1	0	0	1	0	1
S27_100229	27	0	1	0	1	-	0	1	0	0	1	1	0	1	1	0	0	0	-	1	0	1	0	1	1	0	1	0	1	0	1	1	0	0	1	1	0	0	0	0	1	0	0	1	0	0	1	0	1
S27_116913	27	0	0	0	0	1	0	1	0	0	1	1	0	0	1	0	0	0	0	1	0	0	0	1	1	0	1	1	1	0	0	0	1	1	1	1	1	1	1	0	1	0	0	1	0	0	0	0	0
S27_147830	27	0	1	0	1	1	0	1	0	0	1	1	0	1	1	0	0	0	1	1	0	1	0	1	1	0	1	0	1	0	1	1	0	0	1	1	0	0	0	0	1	0	0	1	0	0	1	0	1
S27_176002	27	0	1	0	1	1	0	1	0	0	1	1	0	1	1	0	0	0	1	1	0	1	0	1	1	0	1	0	1	0	1	1	0	0	1	1	0	0	0	0	1	0	0	1	0	0	1	0	1
S27_180169	27	0	1	0	1	1	1	1	0	0	1	1	0	1	1	0	0	0	1	1	0	1	0	1	1	0	1	0	1	0	1	1	0	0	1	1	0	0	0	0	1	0	0	1	0	0	1	0	1
S27_186123	27	0	1	0	1	0	0	1	0	0	1	0	0	1	1	0	0	0	1	1	0	1	0	1	0	0	0	0	1	0	1	1	0	0	1	0	0	0	0	0	0	0	0	0	0	0	1	0	1
S27_200089	27	0	1	0	1	0	1	1	0	0	1	0	0	1	1	0	0	0	1	1	0	1	0	1	0	0	0	0	1	0	1	1	0	0	1	0	0	0	0	0	0	0	0	0	0	0	1	0	1
S27_229225	27	0	1	0	1	0	0	1	0	0	1	1	0	1	0	-	0	0	0	1	0	1	0	1	1	0	1	0	1	0	1	1	0	0	0	1	0	0	0	0	1	0	0	1	0	0	1	0	1
S27_243658	27	0	1	0	1	1	0	1	0	0	1	1	0	1	1	0	0	0	0	1	0	1	0	1	1	0	1	0	1	0	0	1	0	0	0	1	0	0	0	0	1	0	0	1	0	0	1	0	1
S27_270074	27	0	1	0	1	0	1	1	0	0	1	0	0	1	1	0	0	0	1	1	0	1	0	1	0	0	0	0	1	0	1	1	0	0	0	0	0	0	0	0	0	0	0	0	0	0	1	0	1
S27_271929	27	0	1	0	1	1	0	1	0	0	1	1	0	1	1	0	0	0	1	1	0	1	0	1	1	0	1	0	1	0	1	1	0	0	0	1	0	0	0	0	1	0	0	1	0	0	1	0	1
S27_317086	27	0	1	0	1	1	1	1	0	0	1	1	0	1	1	0	0	0	1	1	0	1	0	1	1	0	1	0	1	0	1	1	0	0	0	1	0	0	0	0	1	0	0	1	0	0	1	0	1
S27_323286	27	0	1	0	1	1	0	1	0	0	1	1	0	1	1	-	0	0	0	1	0	1	0	1	1	0	1	0	1	0	1	1	0	0	0	1	0	0	0	0	1	0	1	1	0	0	0	0	1
S27_331971	27	0	1	0	1	1	1	1	0	0	1	1	0	1	1	-	0	0	1	1	0	1	0	1	1	0	1	0	1	0	1	1	0	0	0	1	0	0	0	0	1	0	0	1	0	-	1	0	1
S27_336051	27	0	1	0	1	1	1	1	0	0	1	1	0	1	1	-	0	0	1	1	0	1	0	1	1	0	1	0	1	0	1	1	0	0	0	1	0	0	0	0	1	0	0	1	0	0	1	0	1
S27_353901	27	0	1	0	1	1	1	1	0	0	1	1	0	1	1	0	0	0	1	1	0	1	0	1	1	0	1	0	1	0	1	1	0	0	0	1	0	0	0	0	1	0	0	1	0	0	1	0	1
S27_395910	27	0	1	0	1	1	1	1	0	0	1	1	0	1	1	0	0	0	1	1	0	1	0	1	1	0	1	0	1	0	1	1	0	0	0	1	0	0	0	0	1	0	0	1	0	0	1	0	1
S27_409017	27	0	1	1	1	1	1	1	0	0	1	1	0	1	1	0	0	0	1	1	0	1	0	1	1	0	1	0	1	0	1	1	0	0	0	1	0	0	0	0	1	0	0	1	0	0	1	0	1
S27_420227	27	0	1	0	1	1	0	1	0	0	1	1	0	1	1	-	0	0	1	1	0	1	0	1	1	0	1	0	1	0	1	1	0	0	0	1	0	0	0	0	1	0	0	1	0	0	1	0	1
S27_427022	27	0	1	0	1	1	1	1	0	0	1	1	0	1	1	0	0	0	1	1	0	1	0	1	1	0	1	0	0	0	1	1	0	0	0	1	0	0	0	0	1	0	0	1	0	0	1	0	1
S27_445297	27	0	1	0	1	1	1	1	0	0	1	1	0	1	1	0	0	0	1	1	0	1	0	1	1	0	1	0	1	0	1	1	0	0	0	1	0	0	0	0	1	0	0	1	0	0	1	0	1
S27_450828	27	0	1	0	1	1	1	1	0	0	1	1	0	1	1	0	0	0	1	1	0	1	0	1	1	0	1	0	1	0	0	1	0	0	0	1	0	0	0	0	1	0	0	1	0	0	1	0	1
S27_469691	27	0	1	0	1	1	1	1	0	0	1	1	0	1	1	0	0	0	1	1	0	1	0	1	1	0	1	0	1	0	1	1	0	0	0	1	0	0	0	0	1	0	0	1	0	0	1	0	1
S27_469804	27	0	1	0	1	1	0	1	0	0	1	1	0	1	1	0	0	0	1	0	0	1	0	1	1	0	1	0	1	0	1	1	0	0	0	1	0	0	0	0	1	0	0	1	0	0	1	0	1
S27_528890	27	0	1	0	1	0	1	1	0	0	1	0	0	1	1	0	0	0	1	1	0	1	0	1	0	0	0	0	1	0	1	1	0	0	0	0	0	0	0	0	0	0	0	0	0	0	1	0	1
S27_594912	27	0	1	0	1	1	0	1	0	0	1	0	0	1	1	-	0	0	1	1	0	1	0	1	1	0	0	0	1	-	0	1	0	0	0	0	0	0	0	0	0	0	0	0	0	0	1	0	1
S27_610522	27	0	1	0	1	1	1	1	0	0	1	1	0	1	1	0	0	0	1	1	0	1	0	1	1	0	1	0	1	0	1	1	0	0	0	1	0	0	0	0	1	0	0	1	0	0	1	0	1
S27_627865	27	0	1	0	1	1	1	1	0	0	1	1	0	1	1	0	0	0	1	1	0	1	0	1	1	0	1	0	1	0	1	1	0	0	0	1	0	0	0	0	1	0	0	1	0	0	1	0	1
S27_643122	27	0	1	0	1	1	1	1	0	0	1	1	0	1	1	0	0	0	1	1	0	1	0	1	1	0	1	0	1	0	1	1	0	0	0	1	0	0	0	0	1	0	0	1	0	0	1	0	1
S27_659468	27	0	1	0	1	1	1	1	0	0	1	1	0	1	1	0	0	0	1	1	0	1	0	1	1	0	1	0	1	1	1	1	0	0	0	1	0	0	0	0	1	0	0	1	0	0	1	0	1
S27_671672	27	0	1	0	1	1	1	1	0	0	1	1	0	1	1	0	0	0	1	1	0	1	0	1	1	0	1	0	1	0	1	1	0	0	0	1	0	0	0	0	1	0	0	1	0	0	1	0	1
S27_684395	27	0	1	0	1	0	-	1	0	0	1	1	0	1	1	0	0	0	-	1	0	0	0	1	1	0	1	0	1	0	1	1	0	0	0	1	0	0	0	0	1	0	0	0	0	0	0	0	1
S27_728164	27	0	1	0	1	0	1	1	0	0	1	1	0	1	1	-	0	0	1	1	0	1	0	1	1	0	1	0	1	0	1	1	0	0	0	1	0	0	0	0	1	0	0	1	0	0	1	0	1
S27_740458	27	0	1	0	1	0	1	1	0	0	1	1	0	1	1	0	0	0	1	1	0	1	0	1	1	0	1	0	1	0	1	1	0	0	0	1	0	0	0	0	1	0	0	1	0	0	0	0	1
S27_796564	27	0	1	0	1	0	1	1	0	0	1	1	0	1	1	0	0	0	1	1	0	1	0	1	1	0	1	0	1	0	1	1	0	0	0	1	0	0	0	0	1	0	0	1	0	0	1	0	1
S27_809311	27	0	1	0	1	0	1	1	0	0	1	1	0	1	1	0	0	0	0	1	0	0	0	1	1	0	1	0	1	0	1	1	0	0	0	1	0	0	0	0	1	0	0	1	0	0	1	0	1
S27_815490	27	0	1	0	1	0	1	1	0	0	1	1	0	1	1	0	0	0	1	1	0	1	0	1	1	0	1	0	1	0	1	1	0	0	0	1	0	0	0	0	1	0	0	1	0	0	1	0	1
S27_842614	27	0	1	0	1	0	1	1	0	0	0	1	-	1	1	-	0	0	1	1	0	1	0	1	1	0	1	0	0	0	0	0	0	0	0	1	0	0	0	0	1	0	0	1	0	0	1	0	1
S27_845911	27	0	1	0	1	0	1	1	0	0	1	1	0	1	1	-	0	0	1	1	0	1	0	1	1	0	1	0	1	0	1	1	0	0	0	1	0	0	0	0	1	0	0	1	0	0	1	0	1
S27_848607	27	0	1	0	1	-	-	1	0	0	1	1	0	1	0	-	0	0	1	0	0	1	0	1	1	0	1	0	1	0	0	1	0	0	0	1	0	0	0	0	1	0	0	1	0	0	1	0	0
S27_848732	27	0	1	0	1	0	-	1	0	0	1	1	0	1	1	-	0	0	0	1	0	1	0	1	1	0	1	0	1	0	0	1	0	0	0	-	0	0	0	0	1	0	0	1	0	0	1	0	1
S27_850151	27	-	1	0	1	-	1	1	0	0	0	1	0	1	1	-	0	0	1	1	0	0	0	1	1	0	1	0	1	0	1	1	0	0	0	1	0	0	0	0	1	0	0	1	0	0	1	0	1
S27_850952	27	0	1	0	1	0	1	1	0	0	1	1	0	1	1	0	0	0	1	1	0	1	0	1	1	0	1	0	1	0	1	1	0	0	0	1	0	0	0	0	1	0	0	1	0	0	1	0	1
S27_860289	27	0	1	0	1	0	1	1	0	0	1	1	0	1	1	0	0	0	1	1	0	1	0	1	1	0	1	0	1	0	1	1	0	0	0	1	0	0	0	0	1	0	0	1	0	0	1	0	1
S27_865433	27	0	1	0	1	0	1	1	0	0	1	1	0	1	1	0	0	0	1	1	0	1	0	1	1	0	1	0	1	0	1	1	0	0	0	1	0	0	0	0	1	0	0	1	0	0	1	0	1
S27_894064	27	0	1	0	1	0	-	1	0	0	1	1	0	1	1	0	0	0	1	1	0	1	0	1	1	0	1	0	1	0	1	1	0	0	0	1	0	0	0	0	1	0	0	1	0	0	0	0	1
S27_897502	27	0	1	0	1	0	1	1	0	0	1	1	0	1	1	0	0	0	0	1	0	1	0	1	1	0	1	0	1	0	1	1	0	0	0	1	0	0	0	0	1	0	0	1	0	0	1	0	1
S27_920369	27	0	1	0	1	0	1	1	0	0	1	1	0	1	1	0	0	0	1	1	0	1	0	1	1	0	1	0	1	0	1	1	0	0	0	1	0	0	0	0	1	0	0	1	0	0	1	0	1
S27_955874	27	0	1	0	1	-	-	0	0	0	1	1	0	1	1	-	-	0	1	1	0	1	0	1	1	0	1	0	1	0	0	1	0	0	-	1	0	0	0	0	1	0	0	1	0	0	1	0	1
S27_972465	27	0	1	0	1	0	0	1	0	0	1	1	0	1	0	0	0	0	0	1	0	0	0	1	1	0	1	0	1	0	1	1	0	0	0	1	0	0	0	0	1	0	0	1	0	0	1	0	1
S27_982109	27	0	1	0	1	0	1	1	0	0	1	1	0	1	1	0	0	0	1	1	0	1	0	1	1	0	1	0	1	0	1	1	0	0	0	1	0	0	0	0	1	0	0	1	0	0	1	0	1
S27_982919	27	0	1	0	1	0	1	1	0	0	1	1	0	1	1	0	0	0	1	1	0	1	0	1	1	0	1	0	1	0	1	1	0	0	0	1	0	0	0	0	1	0	0	1	0	0	1	0	1
S27_983036	27	0	1	0	1	0	1	1	0	0	1	1	0	1	1	0	0	0	1	1	0	1	0	1	1	0	1	0	1	0	1	1	0	0	0	1	0	0	0	0	1	0	0	1	0	0	1	0	1
S27_983178	27	0	1	0	1	0	1	1	0	0	0	1	-	1	1	-	0	0	0	1	0	0	0	1	1	0	1	0	1	0	0	0	0	0	-	1	0	0	0	0	1	0	0	0	0	0	1	0	1
S27_986103	27	0	1	0	1	0	1	1	0	0	1	1	0	1	1	0	0	0	1	1	0	1	0	1	1	0	1	0	1	0	1	1	0	0	0	1	0	0	0	0	1	0	0	1	0	0	1	0	1
S27_987085	27	0	1	0	1	-	-	1	0	0	1	1	0	1	1	-	0	0	1	1	0	1	0	1	1	0	1	0	1	0	0	0	0	0	0	1	0	0	0	0	1	0	0	1	0	0	1	0	1
S27_995023	27	0	1	0	1	0	1	1	0	0	1	1	0	1	1	0	0	0	1	1	0	1	0	1	1	0	1	0	1	0	1	1	0	0	0	1	0	0	0	0	1	0	1	1	0	0	1	0	1
S27_998822	27	0	1	0	1	0	1	1	0	0	1	0	0	1	1	0	0	0	1	1	0	1	0	1	1	0	0	0	1	0	0	1	0	0	0	0	0	0	0	0	0	0	0	0	0	0	1	0	1
S27_1017433	27	0	1	0	1	0	1	1	0	0	1	1	0	1	0	-	-	0	0	0	0	0	0	1	1	0	1	0	1	0	-	1	0	0	-	1	0	0	0	0	1	0	0	0	0	0	1	0	0
S27_1022575	27	0	1	0	1	0	0	1	0	0	1	1	0	1	1	0	0	0	1	1	0	1	0	1	1	0	1	0	1	0	1	1	0	0	0	1	0	0	0	0	1	0	0	1	0	-	1	0	1
S27_1022731	27	0	1	0	1	0	1	1	0	0	1	1	0	1	1	0	0	0	1	1	0	1	0	1	1	0	1	0	1	0	1	1	0	0	0	1	0	0	0	0	1	0	0	1	0	0	1	0	1
S27_1038124	27	0	1	0	1	0	1	1	0	0	1	1	0	1	1	0	0	0	1	1	0	1	0	1	1	0	1	0	1	0	1	1	0	0	0	1	0	0	0	0	1	0	0	1	0	0	1	0	1
S27_1074592	27	0	1	0	1	0	1	1	0	0	1	1	0	1	1	0	0	0	1	1	0	1	0	1	1	0	1	0	1	0	1	1	0	0	0	1	0	0	0	0	1	0	0	1	0	0	1	0	1
S27_1075108	27	0	1	0	1	0	1	1	0	0	1	1	0	1	1	0	0	0	1	1	0	1	0	1	1	0	1	0	1	0	1	1	0	0	0	1	0	0	0	0	1	0	0	1	0	0	1	0	1
S27_1091583	27	0	1	0	1	0	1	1	0	0	1	0	0	1	0	0	0	0	1	1	0	1	0	1	1	0	0	0	1	0	1	1	0	0	0	0	0	0	0	0	0	0	0	0	0	0	1	0	1
S27_1114182	27	0	1	0	1	0	1	1	0	0	1	1	0	1	1	0	0	0	1	1	0	1	0	1	1	0	1	0	1	0	1	1	0	0	0	1	0	0	0	0	1	0	0	1	0	0	1	0	1
S27_1117439	27	0	1	0	1	0	0	1	0	0	1	0	0	1	1	-	0	0	1	1	0	1	0	1	1	0	0	0	1	0	1	1	0	0	0	0	0	0	0	0	0	0	0	0	0	-	1	0	1
S27_1117547	27	0	1	0	1	0	1	1	0	0	1	1	0	1	1	0	0	0	1	1	0	0	0	1	1	0	1	0	1	0	1	1	0	0	0	1	0	0	0	0	0	0	0	1	0	0	1	0	0
S27_1155487	27	0	1	0	1	0	0	1	0	0	1	1	0	1	1	0	0	0	0	0	0	1	0	1	0	0	1	0	1	0	1	1	0	0	0	1	0	0	0	0	1	-	0	1	0	0	1	0	1
S27_1155610	27	0	1	0	1	0	1	0	0	0	1	1	0	1	1	0	0	0	1	1	0	1	0	1	1	0	1	0	1	0	0	0	0	0	0	1	0	0	0	0	1	0	0	1	0	0	1	0	1
S27_1157400	27	0	1	0	1	0	1	1	0	0	1	1	0	1	1	0	0	0	1	0	0	1	0	1	1	0	1	0	1	0	1	1	0	0	0	1	0	0	0	0	1	0	0	1	0	0	1	0	1
S27_1158946	27	0	1	0	1	0	1	1	0	0	1	1	0	1	1	0	0	0	1	1	0	1	0	1	1	0	1	0	1	0	1	1	0	0	0	1	0	0	0	0	1	0	0	1	0	0	1	0	1
S27_1159110	27	0	1	0	1	-	-	1	0	0	1	1	0	1	1	0	0	0	1	1	0	0	0	1	1	0	1	0	1	0	0	1	0	0	0	1	0	0	0	0	0	0	0	1	0	0	1	0	0
S27_1169718	27	0	1	0	1	0	1	1	0	0	1	1	0	1	1	0	0	0	1	1	0	1	0	1	1	0	1	0	1	0	1	1	0	0	0	1	0	0	0	0	1	0	0	1	0	0	1	0	1
S27_1200110	27	0	1	0	1	0	1	1	0	0	1	1	0	1	1	0	0	0	1	1	0	1	0	1	1	0	1	0	1	0	1	1	0	0	0	1	0	0	0	0	1	0	0	1	0	0	1	0	1
S27_1226646	27	0	1	0	1	0	1	1	0	0	1	1	0	1	1	0	0	0	1	1	0	1	0	1	1	0	1	0	1	0	1	1	0	0	0	1	0	0	0	0	1	0	0	1	0	0	1	0	1
S27_1251722	27	0	1	0	1	0	0	0	0	0	0	1	0	1	1	-	0	0	1	0	0	1	0	1	1	0	0	0	1	0	1	1	0	0	0	1	0	0	0	0	1	0	0	0	0	0	0	0	1
S27_1274362	27	0	1	0	1	0	0	1	0	0	1	1	0	1	0	0	0	0	0	1	0	1	0	1	1	0	1	0	1	0	0	1	0	0	0	1	0	0	0	0	0	0	0	1	0	0	0	0	1
S27_1276523	27	0	1	0	1	0	0	1	0	0	1	1	0	1	1	0	0	0	-	1	0	1	0	1	1	0	1	0	1	0	0	1	0	0	0	1	0	0	0	0	1	0	0	1	0	0	1	0	1
S27_1298457	27	0	1	0	1	0	1	1	0	0	1	1	0	0	1	0	0	0	1	1	0	1	0	1	1	0	1	0	1	0	1	1	0	0	0	1	0	0	0	0	1	0	0	1	0	0	1	0	1
S27_1338661	27	0	1	0	1	0	1	1	0	0	1	1	0	1	1	0	0	0	1	1	0	0	0	1	1	0	1	0	1	0	1	1	0	0	0	1	0	0	0	0	1	0	0	1	0	0	1	0	1
S27_1345355	27	0	1	0	1	0	1	1	0	0	1	1	0	1	1	0	0	0	1	1	0	1	0	1	1	0	1	0	1	0	1	1	0	0	0	1	0	0	0	0	1	0	0	1	0	0	1	0	1
S27_1356241	27	0	1	0	1	0	1	1	0	0	1	1	0	1	1	0	0	0	1	1	0	1	0	1	1	0	1	0	1	0	1	1	0	0	0	1	0	0	0	0	1	0	0	1	0	0	1	0	1
S27_1356386	27	0	1	0	1	-	1	1	0	0	0	1	0	1	0	-	0	0	0	1	0	1	0	1	1	0	1	0	1	0	0	1	0	0	0	1	0	0	0	0	1	0	0	1	0	0	0	0	1
S27_1417642	27	0	1	0	1	0	0	1	0	0	0	1	0	1	0	0	0	0	1	0	0	1	-	1	1	0	1	0	1	0	0	1	0	0	0	1	1	0	0	0	0	0	0	1	0	0	1	0	1
S27_1475739	27	0	1	0	1	0	1	0	0	0	1	1	0	1	1	0	0	0	1	1	0	1	0	1	1	0	1	0	1	0	0	1	0	0	0	1	1	0	0	0	1	0	0	1	0	0	1	0	1
S27_1485748	27	0	1	0	1	0	1	1	0	0	1	1	0	1	1	0	0	0	1	1	0	1	0	1	1	0	1	0	1	0	1	1	0	0	0	1	1	0	0	0	1	0	0	1	0	0	1	0	1
S27_1536902	27	0	1	0	1	0	1	1	0	0	1	1	0	1	0	0	0	0	1	1	0	1	0	1	1	0	1	0	1	0	1	1	0	0	0	1	1	0	0	0	1	0	0	1	0	0	1	0	1
S27_1537286	27	0	1	0	1	0	1	1	0	0	1	1	0	1	1	0	0	0	1	1	0	1	0	1	1	0	1	0	1	0	1	1	0	0	0	1	1	0	0	0	1	0	0	1	0	0	1	0	1
S27_1537990	27	0	1	0	1	0	1	1	0	0	1	1	0	1	1	0	0	0	1	1	0	1	0	1	1	0	1	0	1	0	1	1	0	0	0	1	1	0	0	0	1	0	0	1	0	0	1	0	1
S27_1538090	27	0	1	0	1	0	1	1	0	0	1	1	0	1	1	0	0	0	1	1	0	1	0	1	1	0	1	0	1	0	1	1	0	0	0	1	1	0	0	0	1	0	0	1	0	0	1	0	1
S27_1556377	27	0	1	0	1	-	0	1	0	-	1	0	0	1	1	0	0	0	0	1	0	0	0	1	1	0	0	0	0	0	1	1	0	0	0	0	1	0	0	0	0	0	0	0	0	0	1	0	0
S27_1564030	27	0	1	0	1	0	1	1	0	0	1	1	0	1	1	0	0	0	1	1	0	1	0	1	1	0	1	0	1	0	1	1	0	0	0	1	1	0	0	0	1	0	0	1	0	0	1	0	1
S27_1600113	27	0	1	0	1	0	1	1	0	0	1	1	0	1	1	0	0	0	1	1	0	1	0	1	1	0	1	0	1	0	1	1	0	0	0	1	1	0	0	0	1	0	0	1	0	0	1	0	1
S27_1602012	27	0	1	0	1	0	1	1	0	0	1	1	0	1	1	0	0	0	1	1	0	1	0	1	1	0	1	0	1	0	1	1	0	0	0	1	1	0	0	0	1	0	0	1	0	0	1	0	1
S27_1602128	27	0	1	0	1	0	1	1	0	0	1	1	0	0	1	-	0	0	1	1	0	1	0	1	1	0	1	0	1	0	0	1	0	0	0	1	1	0	0	0	1	0	0	1	0	0	1	0	1
S27_1602719	27	0	1	0	1	0	1	1	0	0	1	1	0	1	1	0	0	0	1	1	0	1	0	1	1	0	1	0	1	0	1	1	0	0	0	1	1	0	0	0	1	0	0	1	0	0	1	0	1
S27_1621167	27	0	1	0	1	0	1	1	0	0	1	1	0	0	1	0	-	0	1	1	0	1	0	1	1	0	1	0	1	0	1	1	0	0	0	1	1	0	0	0	0	0	0	1	0	0	1	0	1
S27_1621267	27	0	1	0	1	0	1	1	0	0	1	1	0	1	1	0	0	0	1	1	0	1	0	1	0	0	1	0	1	0	1	1	0	0	0	1	1	0	0	0	1	0	0	1	0	0	1	0	1
S27_1628014	27	0	1	0	1	0	0	1	0	0	1	1	0	1	1	0	0	0	1	1	0	1	0	1	1	0	1	0	1	0	1	1	0	0	0	1	1	0	0	0	1	0	0	1	0	0	1	0	1
S27_1642543	27	0	1	0	1	0	1	1	0	0	1	1	0	1	1	0	0	0	1	1	0	1	0	1	1	0	1	0	1	0	1	1	0	0	0	1	1	0	0	0	1	0	0	1	0	0	1	0	1
S27_1668463	27	0	1	0	1	0	1	1	0	0	0	0	0	1	1	0	0	0	0	1	0	0	0	1	1	0	0	0	1	0	1	1	0	0	0	0	1	0	0	0	0	0	0	0	0	0	1	0	1
S27_1687955	27	0	1	0	1	0	1	1	0	0	1	1	0	0	1	-	0	0	1	1	0	1	0	1	1	0	1	0	1	0	1	1	0	0	0	0	1	0	0	0	1	0	0	1	0	0	0	0	1
S27_1717913	27	0	1	0	1	0	1	1	0	0	1	1	0	1	1	0	0	0	1	1	0	1	0	1	1	0	1	0	1	0	1	1	0	0	0	0	1	0	0	0	1	0	0	1	0	0	1	0	1
S27_1773413	27	0	1	0	1	-	1	1	0	0	1	1	0	1	1	0	0	0	1	1	0	1	0	1	1	0	1	0	1	0	1	1	0	0	0	0	1	0	0	0	1	0	0	1	0	0	1	0	1
S27_1781406	27	0	1	0	1	-	0	1	0	0	1	1	0	0	1	-	0	0	1	1	0	1	0	1	1	0	1	0	1	0	0	1	0	0	0	0	1	0	0	0	1	0	0	1	0	0	1	0	1
S27_1783059	27	0	1	0	1	0	0	1	0	0	1	1	0	1	1	0	0	0	1	1	0	1	0	1	1	0	1	0	1	0	0	1	0	0	0	0	1	0	0	0	1	0	0	1	0	0	0	0	0
S27_1850073	27	0	1	0	1	0	1	1	0	0	1	0	0	1	0	-	0	0	0	1	0	1	0	1	1	0	0	0	1	0	1	1	-	0	0	0	1	0	0	0	1	0	0	1	0	0	0	0	1
S27_1850187	27	0	1	0	1	0	0	1	0	0	1	0	0	0	1	0	0	0	1	0	0	0	0	1	1	0	1	0	1	0	0	1	0	0	0	0	1	0	0	0	1	0	0	1	0	0	1	0	1
	27 Average	0	0.992	0.008	0.992	0.318584	0.758621	0.968	0	0	0.936	0.888	0	0.928	0.888	0	0	0	0.836066	0.919355	0	0.888	0	1	0.928	0	0.896	0.008	0.968	0.00813008	0.796748	0.96	0.00806452	0.008	0.172131	0.854839	0.208	0.008	0.008	0	0.872	0	0.016	0.872	0	0	0.912	0	0.936
S28_59669	28	1	1	0	1	0	1	0	1	1	0	0	0	1	0	0	0	1	0	0	0	1	0	0	0	0	1	0	1	1	0	0	0	0	0	1	1	0	0	1	1	0	0	0	0	1	1	0	0
S28_65450	28	1	1	0	1	0	-	0	1	1	0	0	0	1	0	0	0	1	0	0	0	1	0	0	0	0	1	0	1	1	0	0	0	0	0	1	1	0	0	1	1	0	0	0	0	1	1	0	0
	28 Average	1	1	0	1	0	1	0	1	1	0	0	0	1	0	0	0	1	0	0	0	1	0	0	0	0	1	0	1	1	0	0	0	0	0	1	1	0	0	1	1	0	0	0	0	1	1	0	0
S31_418846	31	-	1	-	-	-	-	1	0	-	1	0	1	1	1	1	-	-	1	1	1	0	-	-	0	0	-	-	-	1	1	-	0	-	1	0	-	1	-	-	-	-	-	1	1	-	-	-	-
	31 Average	#DIV/0!	1	#DIV/0!	#DIV/0!	#DIV/0!	#DIV/0!	1	0	#DIV/0!	1	0	1	1	1	1	#DIV/0!	#DIV/0!	1	1	1	0	#DIV/0!	#DIV/0!	0	0	#DIV/0!	#DIV/0!	#DIV/0!	1	1	#DIV/0!	0	#DIV/0!	1	0	#DIV/0!	1	#DIV/0!	#DIV/0!	#DIV/0!	#DIV/0!	#DIV/0!	1	1	#DIV/0!	#DIV/0!	#DIV/0!	#DIV/0!
S32_70849	32	1	0	0	1	0	0	1	1	1	0	1	0	1	0	-	0	0	1	0	0	1	0	1	1	0	1	1	1	0	1	0	0	1	0	1	0	0	1	1	1	0	0	0	0	0	0	0	0
S32_71013	32	1	0	-	1	0	-	1	1	1	0	1	0	1	0	0	0	0	1	0	0	1	0	1	0	0	1	1	1	-	1	0	0	1	0	1	0	1	1	1	0	0	0	0	0	0	0	0	0
S32_119394	32	1	0	0	1	0	-	1	1	0	0	1	0	1	0	-	0	0	0	0	0	1	0	1	1	0	1	1	1	0	1	0	0	1	0	1	0	1	1	1	1	0	0	0	0	0	0	0	0
S32_216557	32	1	0	1	1	1	0	1	1	1	0	1	0	1	0	1	0	0	1	0	0	1	0	1	1	0	1	0	1	0	1	0	0	1	0	1	0	1	1	1	1	0	0	0	0	0	0	0	0
	32 Average	1	0	0.333333	1	0.25	0	1	1	0.75	0	1	0	1	0	0.5	0	0	0.75	0	0	1	0	1	0.75	0	1	0.75	1	0	1	0	0	1	0	1	0	0.75	1	1	0.75	0	0	0	0	0	0	0	0
S33_9990	33	0	1	0	1	0	1	0	0	0	1	1	0	1	1	0	0	0	1	1	0	1	0	1	1	0	1	0	1	1	0	0	0	0	0	0	1	0	0	0	1	0	0	1	0	0	1	0	1
S33_12305	33	0	1	0	1	-	1	1	0	0	0	1	0	1	1	-	0	0	1	1	0	0	0	1	0	0	0	0	0	1	1	0	0	0	0	0	0	0	0	0	1	0	0	1	0	0	1	0	1
S33_49602	33	0	1	0	1	-	0	1	0	0	1	1	0	1	1	-	-	0	1	1	0	1	0	1	1	0	0	0	1	0	1	0	0	0	0	0	1	0	0	0	1	0	0	1	0	0	1	0	0
S33_49867	33	0	1	0	0	0	-	1	0	0	1	0	0	1	1	0	0	0	0	0	0	1	0	1	1	0	1	0	1	1	1	0	0	0	0	0	1	0	0	0	1	0	0	1	0	0	1	0	1
S33_161046	33	0	1	0	1	0	1	1	0	0	1	1	0	1	1	0	0	0	1	1	0	1	0	1	1	0	1	0	1	1	1	0	0	0	0	0	1	0	0	0	1	0	0	1	0	0	1	0	1
S33_243575	33	0	1	0	1	0	0	1	0	0	1	1	0	1	1	0	0	0	1	0	0	0	0	1	1	0	1	0	1	-	1	0	0	0	0	0	1	0	0	0	1	0	0	1	0	0	1	0	1
S33_243676	33	0	1	0	1	-	-	1	0	0	1	1	0	1	1	0	0	0	1	1	0	1	0	1	1	0	1	0	0	1	0	0	0	0	0	0	1	0	0	0	1	0	0	1	0	0	1	0	1
S33_243792	33	0	1	0	1	-	-	1	0	-	1	0	0	1	1	-	0	0	0	0	0	1	0	1	1	0	0	0	1	-	0	0	0	0	-	0	1	0	0	0	1	0	0	1	0	-	1	0	1
S33_260583	33	0	1	0	1	-	0	1	0	0	1	0	0	1	1	0	0	0	1	1	0	1	0	1	1	0	0	0	1	1	1	0	0	0	0	0	1	0	0	0	1	0	0	1	0	0	1	0	1
S33_264381	33	0	1	0	1	0	0	1	0	0	0	1	0	1	1	0	0	0	0	1	0	1	0	1	1	0	1	0	1	1	1	0	0	0	0	0	1	0	0	0	1	0	0	0	0	0	1	0	1
S33_323823	33	-	1	0	0	0	0	1	0	0	1	1	0	0	1	0	0	0	0	1	0	1	0	1	1	0	1	0	1	1	0	0	0	0	0	0	1	0	0	0	1	0	0	1	0	0	1	0	1
S33_365487	33	0	1	0	1	0	1	1	0	0	1	1	0	1	1	0	0	0	1	1	0	1	0	1	1	0	1	0	1	1	1	0	0	0	0	0	1	0	0	0	1	0	0	1	0	0	1	0	1
S33_428555	33	0	1	0	1	0	0	0	0	0	1	1	0	1	1	0	0	0	1	1	0	1	0	1	1	0	1	0	1	1	1	0	0	0	0	0	1	0	0	0	1	0	0	0	0	0	1	0	1
S33_429729	33	0	1	0	1	0	-	1	0	0	1	1	0	1	1	-	0	0	1	0	0	1	0	1	1	0	1	0	1	0	1	0	0	0	0	0	1	0	0	0	1	0	0	1	0	-	1	0	1
S33_517256	33	0	1	0	1	0	1	1	0	0	1	1	0	1	1	0	0	0	1	1	0	1	0	1	1	0	1	0	1	0	0	0	0	0	0	0	1	0	0	0	1	0	0	1	0	0	1	0	1
S33_622360	33	0	1	0	1	0	1	1	0	0	1	0	0	1	1	0	0	0	1	1	0	1	0	1	1	0	0	0	1	1	1	0	0	0	0	0	1	0	0	0	1	0	0	1	0	0	1	0	1
S33_706843	33	0	1	0	1	0	1	1	0	0	1	1	0	1	1	0	0	0	1	1	0	1	0	1	1	0	1	0	1	1	1	0	0	0	0	0	1	0	0	0	1	0	0	1	0	0	1	0	1
S33_749480	33	0	1	1	1	1	1	1	1	1	1	1	1	1	0	0	0	1	1	1	1	0	1	1	1	0	1	0	1	1	0	1	1	1	1	1	1	1	1	0	1	1	0	1	1	0	0	1	1
S33_871935	33	-	1	0	1	-	0	1	0	0	1	1	0	1	1	0	0	0	-	1	0	0	0	1	1	0	1	0	0	0	-	0	0	0	0	0	1	0	0	0	1	0	0	1	0	0	1	0	1
S33_1054153	33	0	1	0	1	0	1	1	0	0	1	1	0	1	1	0	0	0	1	0	0	1	0	1	1	0	1	0	1	1	1	0	0	0	0	0	1	0	0	0	1	0	0	1	0	0	1	0	1
S33_1055182	33	0	1	0	1	-	-	1	0	1	1	1	-	1	0	-	0	0	0	1	0	1	0	1	0	0	1	-	1	0	1	0	0	0	0	0	1	0	0	0	1	0	0	1	0	-	1	-	1
S33_1070613	33	0	1	0	1	0	1	1	0	0	-	1	0	1	1	-	0	0	1	1	0	1	0	1	1	0	1	0	0	0	1	0	0	0	0	0	1	0	0	0	1	0	0	1	0	0	1	0	1
S33_1085808	33	0	1	0	1	-	1	0	0	0	0	1	0	1	1	0	0	0	1	1	0	1	0	1	1	0	1	0	1	-	0	0	0	0	0	0	1	0	0	0	0	0	0	1	0	0	1	0	1
S33_1140289	33	0	1	0	1	0	1	1	0	0	1	1	0	1	1	0	0	0	1	1	0	1	0	1	1	0	1	0	1	1	1	0	0	0	0	0	1	0	0	0	1	0	0	1	0	0	1	0	1
S33_1162079	33	0	1	0	1	0	1	1	0	0	1	1	0	1	1	0	0	0	1	1	0	1	0	1	1	0	1	0	1	1	1	0	0	0	0	0	1	0	0	0	1	0	0	1	0	0	1	0	1
S33_1236308	33	0	1	0	1	0	0	1	0	0	1	0	0	1	1	-	0	0	-	1	0	1	0	1	0	0	1	0	1	1	1	0	0	0	0	0	1	0	0	0	1	0	0	1	0	0	1	0	1
S33_1243607	33	0	1	0	1	0	1	1	0	0	1	1	0	1	1	0	0	0	1	1	0	1	0	1	1	0	1	0	1	1	1	0	0	0	0	0	1	0	0	0	1	0	0	1	0	0	1	0	1
	33 Average	0	1	0.037037	0.925926	0.0526316	0.636364	0.888889	0.037037	0.0769231	0.884615	0.814815	0.0384615	0.962963	0.925926	0	0	0.037037	0.8	0.814815	0.037037	0.851852	0.037037	1	0.888889	0	0.814815	0	0.851852	0.75	0.730769	0.037037	0.037037	0.037037	0.0384615	0.037037	0.962963	0.037037	0.037037	0	0.962963	0.037037	0	0.925926	0.037037	0	0.962963	0.0384615	0.962963
S34_149481	34	0	1	0	1	0	1	1	0	0	1	1	0	1	1	0	0	0	1	1	0	1	0	1	1	0	1	0	1	1	1	0	0	0	0	0	1	0	0	0	1	0	0	1	0	0	1	0	1
S34_192150	34	0	1	0	1	0	0	1	0	0	1	1	0	1	1	0	0	0	0	1	0	1	0	1	0	0	1	0	1	0	0	0	0	0	0	0	1	0	0	0	1	0	0	1	0	0	1	0	1
S34_192269	34	0	1	0	1	0	0	1	0	0	1	1	0	1	1	0	0	0	0	0	0	1	0	1	1	0	1	0	1	1	0	0	0	0	0	0	1	0	0	0	1	0	0	0	0	0	1	0	1
S34_217592	34	0	1	0	1	0	0	1	0	0	1	1	0	1	1	0	0	0	1	1	0	1	0	1	1	0	1	0	1	1	1	0	0	0	0	0	1	0	0	0	1	0	0	1	0	0	1	0	1
S34_243101	34	0	1	0	-	-	-	-	-	0	1	0	0	-	1	-	0	1	1	1	0	0	1	0	0	1	1	0	-	1	-	0	0	1	-	0	1	1	-	0	-	1	0	1	1	0	-	1	0
S34_250216	34	0	1	0	1	0	1	1	0	0	1	1	0	1	1	0	0	0	1	1	0	1	0	1	1	0	1	0	1	1	1	0	0	0	0	0	1	0	0	0	1	0	0	1	0	0	1	0	1
	34 Average	0	1	0	1	0	0.4	1	0	0	1	0.833333	0	1	1	0	0	0.166667	0.666667	0.833333	0	0.833333	0.166667	0.833333	0.666667	0.166667	1	0	1	0.833333	0.6	0	0	0.166667	0	0	1	0.166667	0	0	1	0.166667	0	0.833333	0.166667	0	1	0.166667	0.833333
S37_28871	37	0	1	0	0	0	-	1	1	0	1	1	1	1	1	0	0	0	0	1	1	1	0	0	1	0	0	0	0	1	0	0	0	0	-	1	0	1	0	0	0	0	0	0	1	0	0	0	0
S37_28989	37	0	1	0	0	0	-	1	1	0	0	1	1	1	1	0	0	0	1	1	0	1	0	0	1	0	0	0	0	0	1	0	1	0	1	1	0	1	0	0	0	0	0	0	1	0	-	0	0
S37_52933	37	0	1	0	0	0	0	1	1	0	0	1	0	1	0	1	0	0	1	1	1	1	0	0	1	0	0	0	0	-	1	0	1	0	0	1	0	0	0	0	0	0	0	1	1	-	0	0	0
S37_105267	37	0	1	0	0	0	0	1	1	0	1	1	1	1	1	1	0	0	1	1	0	1	0	0	1	0	0	0	0	1	1	0	1	0	0	1	0	1	0	0	0	0	0	1	1	0	0	0	0
S37_144527	37	0	1	0	0	0	0	1	1	0	1	1	0	0	1	-	0	0	1	1	1	1	0	0	1	0	0	0	0	0	0	0	0	0	0	1	0	1	0	0	0	0	0	1	1	0	0	0	0
S37_144672	37	0	1	0	0	0	-	1	1	0	0	1	1	1	1	0	0	0	0	0	1	1	0	0	1	0	0	0	0	0	0	0	1	0	1	1	0	1	-	0	0	0	0	1	1	0	0	0	0
S37_215841	37	0	1	0	0	0	-	1	1	0	1	1	0	1	1	0	0	0	1	1	1	0	0	0	1	0	0	0	0	0	1	0	0	0	0	1	0	1	0	0	0	0	0	1	1	0	0	0	0
S37_268662	37	0	1	0	0	-	-	0	1	0	1	1	0	1	1	-	0	0	0	1	1	1	0	0	1	0	0	0	0	1	1	0	1	0	0	1	0	0	0	0	0	0	0	1	1	0	0	0	0
S37_270057	37	0	1	0	0	0	0	1	1	0	1	1	1	1	1	0	0	0	1	1	1	1	0	0	1	0	0	0	0	1	1	0	1	0	1	1	0	1	0	0	0	0	0	1	1	0	0	0	0
	37 Average	0	1	0	0	0	0	0.888889	1	0	0.666667	1	0.555556	0.888889	0.888889	0.285714	0	0	0.666667	0.888889	0.777778	0.888889	0	0	1	0	0	0	0	0.5	0.666667	0	0.666667	0	0.375	1	0	0.777778	0	0	0	0	0	0.777778	1	0	0	0	0
S39_73412	39	0	1	0	1	0	1	0	1	1	0	0	0	1	0	0	0	1	0	0	0	1	0	0	0	0	1	0	1	1	0	0	0	0	0	1	1	0	0	1	1	0	0	0	0	0	1	0	0
S39_73519	39	0	1	0	1	-	0	0	1	1	0	0	0	1	0	-	0	1	0	0	0	1	0	0	0	0	1	0	1	1	0	0	0	0	0	1	1	0	0	1	1	0	0	0	0	1	1	0	0
	39 Average	0	1	0	1	0	0.5	0	1	1	0	0	0	1	0	0	0	1	0	0	0	1	0	0	0	0	1	0	1	1	0	0	0	0	0	1	1	0	0	1	1	0	0	0	0	0.5	1	0	0
S41_92139	41	0	1	0	0	0	1	1	0	0	0	0	0	1	1	1	1	0	0	1	0	1	0	0	0	0	0	1	0	0	1	1	0	1	0	0	0	1	1	0	0	0	0	0	0	1	0	0	0
S41_116402	41	0	1	1	0	0	1	0	1	0	0	0	0	1	1	0	0	0	0	1	0	1	0	0	0	0	0	1	0	0	0	1	0	0	0	0	0	1	1	0	0	0	0	0	0	1	0	0	0
S41_117209	41	0	1	0	0	1	1	1	1	0	0	0	0	1	1	1	1	0	0	1	0	1	0	0	0	0	0	1	0	0	1	1	0	0	0	0	0	1	1	0	0	0	0	0	0	1	0	0	0
S41_118066	41	0	1	0	0	1	1	1	1	0	0	0	0	1	1	1	1	0	0	1	0	1	0	0	0	0	0	1	0	0	1	1	0	1	0	0	0	1	1	0	0	0	0	0	0	1	0	0	0
S41_124378	41	0	1	0	0	0	0	1	1	0	0	0	0	1	0	-	1	0	0	1	0	1	0	0	0	0	0	1	0	-	0	1	0	1	-	0	0	1	0	0	0	0	0	0	0	1	0	0	0
S41_125914	41	0	1	0	0	0	1	1	1	0	0	0	0	1	1	0	1	0	-	1	0	1	0	0	0	0	0	0	0	0	1	1	0	1	0	0	0	1	1	0	0	0	0	0	0	1	0	0	0
S41_132418	41	0	1	0	0	1	1	1	1	0	0	0	0	1	1	1	1	0	0	1	0	1	0	0	0	0	0	1	0	0	1	1	0	1	0	0	0	1	1	0	0	0	0	0	0	1	0	0	0
S41_208756	41	0	1	0	0	0	-	1	1	0	0	0	0	1	1	0	0	0	0	1	0	1	0	0	0	0	0	1	0	0	1	1	0	0	0	0	0	1	1	0	0	0	0	0	0	1	0	0	0
S41_209123	41	0	1	0	0	-	0	1	0	0	0	0	0	1	1	-	-	0	0	1	0	1	0	0	0	0	0	1	0	0	0	0	0	1	0	0	0	1	1	0	0	0	0	0	0	1	0	0	0
S41_209262	41	0	1	0	0	0	0	1	0	0	0	0	0	1	1	0	1	0	0	1	0	1	0	0	0	0	0	1	0	0	1	1	0	1	0	0	0	1	1	0	0	0	0	0	0	1	0	0	0
S41_213799	41	0	1	1	0	0	0	1	1	0	0	0	0	1	1	-	1	0	0	1	0	0	0	0	0	0	0	0	0	0	1	1	0	0	-	0	0	1	1	0	0	0	0	0	0	0	0	0	0
S41_214627	41	0	1	0	0	1	1	1	1	0	0	0	0	1	1	0	1	0	0	1	0	0	0	0	0	0	0	1	0	0	1	1	0	1	0	0	0	1	1	0	0	0	0	0	0	1	0	0	0
	41 Average	0	1	0.166667	0	0.363636	0.636364	0.916667	0.75	0	0	0	0	1	0.916667	0.444444	0.818182	0	0	1	0	0.833333	0	0	0	0	0	0.833333	0	0	0.75	0.916667	0	0.666667	0	0	0	1	0.916667	0	0	0	0	0	0	0.916667	0	0	0
S42_39378	42	1	0	0	1	0	0	1	0	0	0	1	0	1	0	0	0	0	1	1	1	0	1	0	0	1	1	0	0	1	0	1	0	0	0	0	0	1	0	1	1	1	0	0	1	1	0	1	0
S42_39504	42	-	0	0	1	0	0	1	0	1	0	1	0	1	0	-	1	0	0	1	1	1	1	0	0	1	0	0	0	1	0	1	0	1	1	0	0	1	0	1	1	1	0	0	1	1	0	1	0
S42_56367	42	1	0	0	1	1	1	1	0	1	0	1	0	1	0	0	0	0	1	1	1	0	1	0	0	1	1	0	0	1	0	1	1	1	1	0	0	1	0	1	1	1	0	0	1	0	0	1	0
S42_90260	42	1	0	0	1	1	0	1	0	1	0	1	0	1	0	0	0	0	1	1	1	1	1	0	0	1	1	0	0	1	0	1	1	0	1	0	0	1	0	1	1	1	0	0	1	1	0	1	0
S42_115393	42	1	0	0	1	1	1	1	0	1	0	1	0	1	0	1	0	0	0	1	1	1	1	0	0	1	1	0	0	1	0	1	1	1	1	0	0	1	0	1	1	1	0	0	1	1	0	1	0
S42_126515	42	0	0	0	1	-	1	1	0	1	0	1	0	1	0	1	0	0	1	0	1	0	1	0	0	1	1	0	0	1	0	1	0	1	1	0	0	1	0	1	1	0	0	0	1	0	0	0	0
S42_126656	42	1	0	0	1	0	0	1	0	1	0	1	0	1	0	0	1	0	-	1	1	0	1	0	0	1	1	0	0	1	0	1	0	0	1	0	0	1	0	1	1	0	0	0	1	1	1	1	0
S42_127761	42	1	0	0	1	1	0	1	0	1	0	1	0	1	0	-	0	0	1	1	1	0	1	0	0	1	1	0	0	1	0	1	1	1	1	0	0	1	0	1	1	0	0	0	1	1	0	1	0
S42_140224	42	0	0	0	1	-	-	1	0	1	0	1	0	1	0	0	-	-	0	1	1	0	1	0	0	1	1	0	-	-	-	1	0	0	0	-	0	1	0	1	1	1	0	0	1	0	0	1	0
S42_140703	42	0	0	0	1	1	1	1	0	0	0	1	0	0	0	-	1	0	1	1	1	0	1	0	0	1	1	0	0	1	0	1	1	0	1	0	0	1	0	1	1	1	0	0	0	1	0	1	0
S42_146781	42	0	0	0	1	0	0	1	0	1	0	0	0	0	0	0	1	0	0	1	1	1	1	0	0	1	0	0	0	1	0	1	0	1	1	0	0	1	0	0	1	0	0	0	1	0	0	0	0
S42_152808	42	1	0	0	1	0	-	1	0	1	-	1	0	1	0	-	-	0	0	1	0	1	1	0	0	1	1	0	0	1	0	1	0	0	1	0	0	1	0	1	1	0	0	0	1	1	0	0	0
S42_165893	42	1	0	0	1	0	1	1	0	1	0	1	0	1	0	1	1	0	1	1	1	0	1	0	0	1	1	0	0	1	0	1	1	1	1	0	0	1	0	1	1	1	0	0	1	1	0	1	0
S42_166025	42	1	0	0	1	1	1	1	0	1	0	1	0	1	0	1	1	0	1	1	1	0	1	0	0	1	1	0	0	1	0	1	1	1	1	0	0	1	0	1	1	1	0	0	1	1	0	1	0
S42_182393	42	1	0	0	1	1	1	1	0	1	0	1	0	1	0	1	1	0	1	1	1	1	1	0	0	1	1	0	0	1	0	1	1	1	1	0	0	1	0	1	1	1	0	0	1	1	0	1	0
S42_210070	42	1	-	0	0	1	0	1	-	1	-	1	0	0	-	0	1	-	1	0	0	0	0	-	-	1	1	0	0	1	0	1	1	0	1	-	-	0	0	1	0	1	0	-	0	0	0	1	0
S42_214212	42	0	0	-	1	-	0	1	0	0	-	1	-	1	0	-	1	0	1	0	1	0	1	0	0	1	0	0	-	0	0	1	0	1	-	0	0	0	0	1	1	0	0	0	1	-	0	1	0
S42_223346	42	-	0	0	1	-	-	1	0	0	0	1	-	1	0	-	0	0	1	1	1	0	1	0	-	1	1	0	-	0	-	-	1	1	0	0	0	0	0	1	0	1	0	0	1	0	0	0	0
S42_237202	42	1	0	0	1	1	1	1	0	1	0	1	0	1	0	1	1	0	0	1	1	0	1	0	0	1	1	0	0	1	0	1	1	1	0	0	0	1	0	1	1	0	0	0	1	1	1	1	0
S42_279557	42	0	0	0	1	1	0	1	0	1	0	1	-	1	0	-	0	0	-	0	1	1	1	0	0	1	1	0	0	1	-	1	0	1	0	0	0	1	-	1	1	1	0	0	1	1	0	1	0
S42_285879	42	1	0	0	1	1	1	1	0	1	0	1	0	1	0	1	1	0	1	1	1	0	1	0	0	1	1	0	0	1	0	1	1	1	1	0	0	1	0	1	1	1	0	0	1	1	0	1	0
S42_287221	42	1	0	0	1	1	0	1	0	1	0	1	0	-	0	0	1	0	1	1	1	0	1	0	0	1	1	0	0	0	0	1	1	1	1	0	0	1	0	1	1	1	0	0	1	0	0	1	0
S42_303040	42	0	-	0	1	0	1	1	0	1	-	0	-	0	0	1	1	0	1	1	1	0	0	-	0	0	0	0	0	-	0	1	1	-	1	0	-	0	0	1	0	1	0	0	1	-	0	0	0
S42_317980	42	1	0	0	1	1	1	1	0	1	0	1	0	1	0	1	1	0	1	1	1	1	1	0	0	1	1	0	0	1	0	1	1	1	1	0	0	1	0	1	1	1	0	0	1	1	0	1	0
S42_323602	42	1	0	0	1	1	1	1	0	1	0	1	0	1	0	1	1	0	1	1	1	0	1	0	0	1	1	0	0	1	0	1	1	1	1	0	0	1	0	1	1	1	0	0	1	1	0	1	0
S42_324708	42	1	0	0	1	0	1	1	0	1	0	1	0	1	0	0	0	0	1	1	1	0	1	0	0	1	1	0	0	1	0	1	1	1	1	0	0	1	0	1	1	0	0	0	1	1	0	1	0
S42_400750	42	1	0	0	1	1	1	1	0	1	0	1	0	1	0	0	1	0	0	1	1	1	1	0	0	1	1	0	0	1	0	1	1	1	1	0	0	1	0	1	1	1	0	0	1	1	1	1	0
S42_404434	42	0	0	0	1	0	-	1	0	1	0	1	0	1	0	-	0	0	0	0	1	0	1	0	0	1	0	0	-	1	0	1	0	0	-	0	0	1	-	1	0	1	0	0	1	0	0	1	0
S42_426492	42	1	0	1	1	1	1	1	0	1	0	1	0	1	0	1	1	0	1	1	1	0	1	0	0	1	1	0	0	1	0	1	1	1	1	0	0	1	0	1	1	1	0	0	1	1	1	1	0
S42_429419	42	1	0	0	1	1	1	1	0	1	0	1	0	1	0	1	1	0	1	1	1	1	1	0	0	1	1	0	0	1	0	1	1	1	1	0	0	1	0	1	1	1	0	0	1	1	0	1	0
S42_429590	42	0	0	0	1	0	1	1	0	1	0	1	0	1	0	1	1	0	0	1	1	0	1	0	0	1	1	0	0	1	0	1	1	0	1	0	0	1	0	1	1	1	0	0	1	0	0	1	0
S42_437309	42	1	0	0	1	1	1	1	0	1	0	1	0	1	0	1	1	0	1	1	1	1	1	0	0	1	1	0	0	1	0	1	1	1	1	0	0	1	0	1	1	1	0	0	1	1	0	1	0
S42_440225	42	1	0	0	1	-	0	1	0	1	0	0	0	0	0	1	-	0	1	1	1	0	1	0	0	1	1	0	0	-	0	-	0	0	-	0	0	0	0	0	1	1	0	0	1	-	0	0	0
S42_545153	42	0	0	0	1	-	0	0	0	1	0	1	-	1	0	-	-	0	0	1	1	1	1	0	0	0	1	0	0	1	0	1	0	1	1	0	0	1	0	1	1	1	0	0	1	-	0	1	0
S42_718692	42	0	0	0	1	1	1	0	0	0	0	1	0	0	0	0	1	0	1	1	1	1	1	0	0	1	1	0	0	0	0	1	0	1	1	0	0	1	0	1	1	1	0	0	1	1	0	1	0
S42_729988	42	1	0	0	1	0	-	1	0	0	0	1	0	0	0	-	1	0	1	1	1	0	1	0	0	1	1	0	0	1	0	1	0	0	0	0	0	1	0	1	1	1	0	0	1	0	0	1	0
S42_730496	42	1	0	0	1	0	-	1	0	1	0	1	0	0	0	-	0	0	0	1	1	1	1	0	0	1	1	0	0	1	0	0	1	1	1	0	0	1	0	1	1	-	0	0	1	1	0	1	0
S42_741432	42	0	0	0	1	0	1	1	0	0	0	1	0	0	0	0	0	0	1	1	1	1	1	0	0	1	1	0	0	-	0	1	0	1	0	0	0	1	-	1	1	0	0	0	1	1	0	1	0
S42_803549	42	0	0	0	1	-	0	1	0	1	0	1	0	0	0	-	1	0	1	0	1	0	1	0	0	1	1	0	0	0	0	1	0	0	1	0	0	1	0	1	1	1	0	0	1	0	0	1	0
S42_836098	42	1	0	0	1	1	0	1	0	1	0	1	0	0	0	0	0	0	1	0	1	0	1	0	0	1	1	0	0	0	0	1	1	0	0	0	0	0	0	1	0	0	0	0	1	0	0	0	0
S42_836201	42	-	0	0	1	-	-	1	0	1	-	0	0	0	0	-	0	0	0	1	1	0	1	0	0	0	0	0	0	1	0	1	1	0	1	-	0	1	0	1	0	1	0	0	1	0	0	1	0
S42_860598	42	1	0	0	1	1	1	1	0	1	0	1	0	0	0	0	1	0	1	1	1	0	1	0	0	1	1	0	0	1	0	1	0	1	1	0	0	1	0	1	1	1	0	0	1	1	1	0	0
S42_886023	42	1	0	0	1	1	-	1	0	1	0	1	0	0	0	-	0	0	1	1	1	0	1	0	0	1	1	0	0	0	1	1	0	1	1	0	0	1	0	1	0	1	0	0	1	0	0	1	0
S42_911335	42	0	0	0	1	0	1	1	0	0	0	1	0	0	0	0	0	0	1	1	1	1	1	0	0	0	1	0	0	0	0	1	1	-	1	0	0	1	0	1	0	1	0	0	1	0	0	1	0
S42_919452	42	-	0	0	1	0	1	1	0	1	0	0	0	0	0	0	1	0	1	0	1	0	0	0	0	1	1	0	0	1	1	1	1	1	1	0	0	0	0	1	1	1	0	0	1	-	1	1	0
S42_939028	42	0	0	0	1	0	0	1	0	0	0	1	0	0	0	-	0	0	1	1	1	0	1	0	0	1	1	0	0	1	0	1	0	1	0	0	0	1	0	1	1	-	0	0	1	1	0	1	0
S42_1013036	42	1	0	0	1	1	1	1	0	1	0	1	0	0	0	1	1	0	1	1	1	0	1	0	0	1	1	0	0	1	1	1	1	1	1	0	0	1	0	1	1	1	0	0	1	1	0	1	0
S42_1018377	42	0	0	0	1	0	0	1	0	1	0	1	0	0	0	0	1	0	1	1	1	1	1	0	0	1	1	0	0	1	1	1	1	1	1	0	0	0	0	1	1	1	0	0	1	1	0	1	0
S42_1024508	42	0	0	0	1	1	0	1	0	1	0	1	0	0	0	-	1	0	1	1	1	0	1	0	0	1	1	0	0	0	1	1	1	1	1	0	0	1	0	1	1	1	0	0	1	0	0	1	0
S42_1039455	42	1	0	0	1	-	1	1	0	0	0	1	0	0	0	0	-	0	0	1	1	0	1	0	0	1	1	0	0	1	0	0	1	1	1	0	0	1	0	1	0	1	0	0	1	-	0	1	0
S42_1082679	42	0	0	0	1	0	-	1	0	1	0	1	0	0	0	1	1	0	1	1	1	1	1	0	0	1	1	0	0	0	0	1	0	1	1	0	0	1	0	1	1	1	0	0	1	1	0	1	0
S42_1092469	42	1	0	0	1	0	1	1	0	1	0	1	0	0	0	0	1	0	1	1	1	0	1	0	0	1	1	0	0	1	1	1	1	1	1	0	0	1	0	1	1	0	0	0	1	0	0	1	0
S42_1096102	42	0	0	0	1	0	0	1	0	1	0	1	0	0	0	0	0	0	0	1	1	0	1	0	0	1	1	0	0	0	1	0	0	0	1	0	0	1	0	1	0	1	0	0	0	-	0	0	0
S42_1134971	42	1	0	0	1	1	1	1	0	1	0	1	0	0	0	1	1	0	1	1	1	1	1	0	0	1	1	0	0	1	1	1	1	1	1	0	0	1	0	1	1	1	0	0	1	1	0	1	0
S42_1152925	42	1	0	0	1	1	1	1	0	1	0	1	0	0	0	-	1	0	1	1	1	1	1	0	0	1	1	0	0	1	1	1	1	1	0	0	0	1	0	1	1	1	0	0	1	1	0	1	0
S42_1153736	42	-	0	0	1	0	0	1	0	1	0	1	0	0	0	-	1	0	0	1	1	1	1	0	0	0	1	0	0	0	1	1	0	0	1	0	0	1	0	1	1	0	0	0	1	1	0	1	0
S42_1153849	42	1	0	0	1	0	1	1	0	0	0	1	0	0	0	0	1	0	1	1	0	1	1	0	0	1	1	0	0	1	0	1	0	1	1	0	0	1	0	0	1	1	0	0	1	1	0	1	0
S42_1156268	42	-	0	0	0	-	-	0	0	1	0	1	-	0	0	1	0	0	0	1	1	0	1	0	0	1	1	0	0	0	1	1	-	1	-	0	0	1	0	1	1	0	0	-	0	0	0	0	0
S42_1164029	42	1	0	0	1	0	0	1	0	1	0	1	0	0	0	0	-	0	0	1	1	1	1	0	0	1	1	0	1	1	1	1	1	1	0	0	0	1	0	1	1	0	0	0	1	1	0	1	0
S42_1192813	42	1	0	0	1	-	1	1	0	1	0	1	0	-	0	0	1	0	1	1	1	0	1	0	0	1	1	0	0	1	1	1	1	1	1	0	0	1	0	1	1	1	0	0	1	1	0	0	0
S42_1220390	42	1	0	0	1	1	0	1	0	1	0	1	0	0	0	-	1	0	0	1	1	0	1	0	0	1	1	0	0	-	0	1	0	0	1	0	0	1	0	1	1	0	0	0	1	0	0	0	0
S42_1245764	42	0	1	1	0	1	0	1	1	0	1	1	1	0	1	0	1	1	0	0	1	1	1	1	1	1	1	0	1	0	0	1	0	1	-	0	0	1	1	1	0	0	1	0	1	0	1	0	1
	42 Average	0.642857	0.0166667	0.0327869	0.951613	0.54902	0.576923	0.951613	0.0163934	0.806452	0.0175439	0.919355	0.0178571	0.466667	0.0163934	0.44186	0.660714	0.0166667	0.683333	0.854839	0.951613	0.387097	0.951613	0.0166667	0.0166667	0.919355	0.903226	0	0.0344828	0.754386	0.220339	0.95	0.590164	0.716667	0.807018	0	0	0.870968	0.0169492	0.951613	0.822581	0.733333	0.016129	0	0.935484	0.636364	0.112903	0.790323	0.016129
S43_149783	43	0	1	0	0	0	0	1	1	0	1	1	1	1	1	1	0	0	1	0	1	1	0	0	1	0	0	0	0	1	1	0	1	0	0	1	0	1	0	0	0	0	0	1	0	0	0	0	0
S43_151108	43	0	1	0	0	0	0	1	1	0	1	1	0	1	1	0	-	0	1	0	1	1	0	0	1	0	0	0	0	1	1	0	1	0	0	1	0	1	0	0	0	0	0	1	0	0	0	0	0
S43_154325	43	0	1	0	0	0	-	1	1	0	1	1	1	1	1	0	0	0	1	0	1	1	0	0	1	0	0	0	0	1	1	0	1	0	0	1	0	1	0	0	0	0	0	1	0	0	0	0	0
S43_175672	43	0	1	0	0	0	0	1	1	0	1	1	1	1	1	0	0	0	1	0	1	0	0	0	1	0	0	0	0	1	1	0	1	0	0	1	0	1	0	0	0	0	0	1	0	0	0	0	0
S43_175802	43	0	1	0	0	0	-	1	1	0	0	1	1	1	1	0	0	0	1	0	1	1	0	0	1	0	0	0	0	1	0	0	1	0	0	1	0	1	0	0	0	0	0	1	0	0	0	0	0
S43_235978	43	0	1	0	1	-	0	1	0	0	0	1	0	1	0	-	0	0	0	0	0	1	1	0	0	1	1	0	1	0	0	0	-	0	1	0	1	0	1	1	0	0	1	-	0	1	0	0	0
S43_255209	43	0	1	0	0	0	0	1	0	0	1	1	1	0	0	-	0	0	1	0	1	-	0	0	1	0	0	0	0	0	0	0	1	0	0	1	0	1	0	0	0	-	0	1	0	0	0	0	0
S43_255433	43	0	1	0	0	0	0	1	1	0	1	1	1	1	1	0	0	0	1	0	1	0	0	0	1	0	0	0	0	1	1	0	1	0	0	1	0	1	0	0	0	0	0	1	0	0	0	0	0
S43_263686	43	0	1	0	0	-	-	1	1	0	0	1	1	1	1	-	0	0	1	0	1	0	0	0	1	0	0	0	0	1	0	0	1	0	0	1	0	1	0	0	0	0	0	1	0	0	0	0	0
S43_263788	43	0	1	0	0	0	0	1	1	0	1	1	1	1	1	0	0	0	0	0	1	0	0	0	0	0	0	0	0	-	-	0	0	0	0	1	0	1	0	0	0	0	0	1	0	0	0	0	0
S43_280663	43	0	1	0	0	0	0	1	1	0	1	1	1	1	1	0	0	0	1	0	1	1	0	0	1	0	0	0	0	1	1	0	1	0	0	1	0	1	0	0	0	0	0	1	0	0	0	0	0
S43_280804	43	0	1	0	0	0	0	1	1	0	1	1	1	1	1	1	0	0	1	0	1	1	0	0	1	0	0	0	0	1	1	0	1	0	0	1	0	1	0	0	0	0	0	1	0	0	0	0	0
S43_288221	43	0	1	0	0	0	0	1	0	0	1	1	1	1	1	1	0	0	1	0	1	1	0	0	1	0	0	0	0	1	1	0	1	0	0	1	0	1	0	0	0	0	0	1	0	0	0	0	0
S43_306868	43	0	1	0	0	0	0	1	1	0	1	1	1	1	1	1	0	0	1	0	1	1	0	0	1	0	0	0	0	1	1	0	1	0	0	1	0	1	0	0	0	0	0	1	0	0	0	0	0
S43_318210	43	0	1	0	0	0	0	1	1	0	0	1	1	1	1	1	0	0	1	0	1	1	0	0	1	0	0	0	0	1	1	0	1	0	0	1	0	1	0	0	0	0	0	1	0	0	0	0	0
S43_318317	43	0	1	0	0	-	-	1	1	0	1	1	0	1	1	-	0	0	1	0	1	0	0	0	0	0	0	0	0	0	1	0	-	0	0	1	0	-	0	0	0	0	0	1	0	0	0	0	0
S43_324854	43	0	1	0	0	0	0	1	1	0	1	1	1	1	1	0	0	0	1	0	1	1	0	0	1	0	0	0	0	1	1	0	1	0	0	1	0	1	0	0	0	0	0	1	0	0	0	0	0
S43_380730	43	0	1	0	0	0	0	1	1	0	1	1	0	1	1	1	0	0	0	0	1	1	0	0	1	0	0	0	0	1	1	0	0	0	0	1	0	1	0	0	0	0	0	1	0	0	0	0	0
S43_387857	43	0	1	1	0	0	0	1	1	0	1	1	1	1	0	0	0	0	1	0	1	1	0	0	1	0	0	0	0	0	0	0	1	0	0	1	0	1	0	0	0	0	0	1	0	0	0	0	0
S43_405479	43	-	1	0	0	0	0	1	1	0	0	1	1	1	0	-	0	0	1	0	1	0	0	0	1	0	0	0	0	0	0	0	0	0	0	0	0	1	0	0	0	0	0	1	0	0	0	0	0
S43_405617	43	0	0	0	0	0	0	1	0	0	1	1	1	1	1	0	0	0	1	0	1	1	0	0	1	0	0	0	0	1	1	0	1	-	0	1	0	1	0	0	0	0	0	1	0	-	0	0	0
S43_405799	43	0	1	0	0	0	0	1	0	0	1	0	1	1	1	0	0	0	1	0	1	1	0	0	0	0	0	0	0	1	1	0	0	0	0	0	0	1	0	0	0	0	0	1	0	0	0	0	0
S43_412735	43	0	1	0	0	0	0	1	1	0	1	1	1	1	1	1	0	0	1	0	1	1	0	0	1	0	0	0	0	1	1	0	1	0	0	1	0	1	0	0	0	0	0	1	0	0	0	0	0
S43_448813	43	0	1	0	0	0	0	1	1	0	1	1	1	1	1	0	0	0	1	0	1	1	0	0	1	0	0	0	0	1	0	0	1	0	0	1	0	1	0	0	0	0	0	1	0	0	0	0	0
S43_449887	43	0	1	0	0	0	0	1	0	0	1	0	1	1	1	0	0	0	1	0	1	1	0	0	0	0	0	0	0	1	0	0	0	0	-	0	0	1	0	0	0	0	0	1	0	0	0	0	0
S43_450490	43	0	1	0	0	0	0	1	1	0	1	1	1	1	1	0	0	0	1	0	1	1	0	0	1	0	0	0	0	1	1	0	1	0	0	1	0	1	0	0	0	0	0	1	0	0	0	0	0
S43_507733	43	0	1	0	0	0	0	1	1	0	0	1	1	1	1	1	0	0	1	0	1	1	0	0	1	0	0	0	0	1	1	0	0	0	0	1	0	1	0	0	0	0	0	1	0	0	0	0	0
S43_566786	43	0	1	0	0	0	-	1	1	0	1	1	0	1	1	-	0	0	1	0	1	1	0	0	1	0	0	0	0	0	0	0	1	0	0	1	0	1	0	0	0	0	0	1	0	0	0	0	0
	43 Average	0	0.964286	0.0357143	0.0357143	0	0	1	0.785714	0	0.785714	0.928571	0.821429	0.964286	0.857143	0.363636	0	0	0.892857	0	0.964286	0.777778	0.0357143	0	0.821429	0.0357143	0.0357143	0	0.0357143	0.777778	0.666667	0	0.769231	0	0.037037	0.857143	0.0357143	0.962963	0.0357143	0.0357143	0	0	0.0357143	1	0	0.037037	0	0	0
S44_9909	44	-	1	-	1	-	0	-	1	0	1	0	-	0	1	0	-	-	1	1	0	1	1	1	1	1	-	1	0	0	1	0	-	1	1	0	-	1	1	0	1	-	0	1	0	-	-	-	1
S44_18903	44	0	1	0	1	0	0	0	1	0	1	0	0	0	1	0	0	0	1	1	0	1	1	1	1	1	0	1	0	1	1	0	0	1	1	1	0	1	-	0	1	0	0	1	0	0	0	0	1
S44_171144	44	0	1	0	1	0	0	0	1	0	1	0	0	0	1	0	0	0	0	1	0	1	1	1	1	1	0	1	0	1	0	0	0	1	1	1	0	1	0	0	0	0	0	0	0	0	0	0	0
	44 Average	0	1	0	1	0	0	0	1	0	1	0	0	0	1	0	0	0	0.666667	1	0	1	1	1	1	1	0	1	0	0.666667	0.666667	0	0	1	1	0.666667	0	1	0.5	0	0.666667	0	0	0.666667	0	0	0	0	0.666667
S45_108739	45	0	0	0	0	0	0	1	0	1	0	1	0	0	0	0	0	1	0	1	0	1	0	1	1	0	1	1	1	0	0	0	1	1	1	1	1	1	1	0	1	0	1	1	0	0	0	0	0
S45_276750	45	0	0	0	0	1	1	1	0	0	0	1	0	0	0	1	0	1	0	1	0	1	0	1	1	0	1	1	1	0	0	0	1	1	0	1	1	1	1	0	1	0	1	1	0	0	0	0	0
S45_339662	45	0	1	0	1	0	-	-	1	-	1	0	0	0	1	-	-	0	1	1	1	0	1	1	0	1	0	-	0	-	1	0	-	-	1	1	1	1	-	1	0	0	0	1	1	0	1	1	1
S45_416488	45	0	0	0	0	1	1	1	0	1	0	1	0	0	0	1	0	1	0	1	0	1	0	1	1	0	1	1	1	0	0	0	1	1	1	1	1	1	1	0	1	0	1	1	0	0	0	0	0
S45_496158	45	0	0	0	0	1	1	1	0	1	0	1	0	0	0	-	0	1	0	1	0	1	0	1	1	0	1	1	1	0	0	0	1	1	0	1	1	1	1	0	1	0	1	1	0	0	0	0	0
	45 Average	0	0.2	0	0.2	0.6	0.75	1	0.2	0.75	0.2	0.8	0	0	0.2	0.666667	0	0.8	0.2	1	0.2	0.8	0.2	1	0.8	0.2	0.8	1	0.8	0	0.2	0	1	1	0.6	1	1	1	1	0.2	0.8	0	0.8	1	0.2	0	0.2	0.2	0.2
S46_10737	46	0	1	0	0	0	0	1	1	0	1	0	0	1	1	0	1	0	0	0	0	1	0	0	1	0	0	1	0	0	1	1	0	0	0	0	0	1	0	0	0	0	0	0	1	1	0	0	0
S46_15472	46	0	1	0	0	1	0	1	1	0	1	0	0	1	1	1	1	0	0	0	0	0	0	0	1	0	0	1	0	0	1	1	0	0	0	0	0	1	1	0	0	0	0	0	1	1	0	0	0
S46_55332	46	0	1	0	0	1	0	1	1	0	1	0	0	1	1	1	1	0	0	0	0	1	0	0	1	0	0	1	0	0	1	1	0	1	0	0	0	1	1	0	0	0	0	0	0	1	0	0	0
S46_55506	46	0	1	0	0	0	0	1	1	0	1	0	0	1	1	-	1	0	0	0	0	1	0	0	1	0	0	1	0	0	0	1	0	1	0	0	0	1	1	0	0	0	0	0	0	1	0	0	0
S46_128897	46	0	1	0	0	1	0	1	1	0	1	0	0	1	1	0	1	0	0	0	0	1	0	0	1	0	0	1	0	0	1	0	0	1	0	0	0	1	0	0	0	0	0	0	0	1	0	0	0
S46_129377	46	0	1	0	0	-	0	1	1	0	1	0	0	1	1	-	0	0	0	0	0	0	0	0	1	0	0	1	0	-	1	1	0	1	0	0	0	1	1	0	0	0	0	0	0	1	0	0	0
S46_134005	46	0	1	0	0	1	0	1	1	0	1	0	0	1	1	1	1	0	0	0	0	1	0	0	1	0	0	1	0	0	1	1	0	1	0	0	0	1	1	0	0	0	0	0	0	1	0	0	0
S46_163164	46	0	1	1	0	1	0	1	1	0	1	0	0	1	1	1	1	0	0	0	0	1	0	0	1	0	0	1	0	0	1	1	0	1	0	0	0	1	1	0	0	0	0	0	0	1	0	0	0
S46_184406	46	0	1	0	0	0	0	1	1	0	1	0	0	1	1	0	0	0	0	0	0	0	0	0	1	0	0	1	0	0	1	1	0	1	0	0	0	1	1	0	0	0	0	0	0	1	0	0	0
S46_251591	46	0	1	0	0	1	0	1	1	0	1	0	0	1	1	1	1	0	0	0	0	1	0	0	0	0	0	1	0	0	1	1	0	1	0	0	0	1	1	0	0	0	0	0	0	1	0	0	0
S46_251699	46	-	1	0	0	1	0	1	1	0	1	0	0	1	1	0	1	0	0	0	0	1	0	0	0	0	0	1	0	0	1	1	0	1	0	0	0	1	1	0	0	0	0	0	0	1	0	0	0
S46_265163	46	0	1	0	0	1	0	1	1	0	1	0	0	1	1	1	1	0	0	0	0	1	0	0	0	0	0	1	0	0	1	1	0	1	0	0	0	1	1	0	0	0	0	0	0	1	0	0	0
S46_272196	46	0	1	0	0	0	0	1	1	0	0	0	0	1	1	-	1	0	0	0	0	1	0	0	0	0	0	1	0	0	1	1	0	1	0	0	0	1	0	0	0	0	0	0	0	0	0	0	0
S46_281310	46	0	1	0	0	1	0	1	1	0	1	0	0	1	1	1	1	0	0	0	0	1	0	0	0	0	0	1	0	0	1	1	0	1	0	0	0	1	1	0	0	0	0	0	0	1	0	0	0
S46_289757	46	0	1	0	0	1	0	1	1	0	1	0	0	1	1	1	1	0	0	0	0	1	0	0	0	0	0	1	0	0	1	1	0	1	0	0	0	1	1	0	0	0	0	0	0	1	0	0	0
S46_403427	46	0	1	0	0	-	0	1	1	0	1	0	0	1	1	1	1	0	0	0	0	0	0	0	0	0	0	1	-	0	1	1	0	1	0	0	0	1	1	0	0	0	0	0	0	1	0	0	0
S46_406697	46	0	1	0	0	1	0	1	1	0	1	0	0	1	1	-	1	0	0	0	0	1	0	0	0	0	0	1	0	0	1	1	0	1	0	0	0	1	1	0	0	0	0	0	0	1	0	0	0
S46_406807	46	0	1	0	0	1	0	1	1	0	1	0	0	0	1	0	1	0	0	0	0	1	0	0	0	0	0	1	0	0	0	1	0	1	0	0	0	1	1	0	0	0	0	0	0	1	0	0	0
S46_447664	46	0	1	0	0	0	0	1	1	0	1	0	0	1	1	0	1	0	0	0	0	1	0	0	0	0	0	1	0	0	1	1	0	1	0	0	0	1	1	0	0	0	0	0	0	0	0	0	0
S46_499255	46	0	1	1	0	1	0	1	1	0	1	0	0	1	1	1	1	0	0	0	0	0	0	0	0	0	0	1	0	0	1	1	0	1	0	0	0	1	1	0	0	0	0	0	0	1	0	0	0
S46_537673	46	0	1	0	0	1	0	0	1	0	1	0	0	1	1	-	1	0	0	0	0	1	0	0	0	0	0	1	0	-	0	1	0	1	0	0	0	1	1	0	0	0	0	0	0	1	0	0	0
S46_539360	46	0	1	0	0	1	0	1	1	0	1	0	0	1	1	1	1	0	0	0	0	0	0	0	0	0	0	1	0	0	1	1	0	1	0	0	0	1	1	0	0	-	0	0	0	1	0	0	0
S46_540044	46	0	1	0	0	0	0	1	1	0	1	1	1	1	0	0	0	0	0	0	1	0	0	0	1	0	0	1	0	0	0	0	1	0	0	1	0	1	0	0	0	0	0	0	0	0	0	0	0
S46_574837	46	0	1	0	0	0	0	1	0	0	1	0	0	1	1	1	1	0	0	0	0	1	0	0	0	0	0	1	0	0	1	1	0	1	0	0	0	1	1	0	0	0	0	0	0	1	0	0	0
S46_575704	46	0	1	0	0	1	0	1	1	0	1	0	0	1	1	1	1	0	0	0	0	0	0	0	0	0	0	1	0	0	1	1	0	1	0	0	0	1	1	0	0	0	0	0	0	1	0	0	0
S46_613426	46	0	1	0	0	0	0	1	0	0	1	0	0	1	1	1	1	0	0	0	0	0	0	0	0	0	0	1	0	0	1	1	0	1	0	0	0	1	1	0	0	0	0	0	0	1	0	0	0
S46_618315	46	0	1	0	0	1	0	1	1	0	1	0	0	1	1	1	1	0	0	0	0	1	0	0	0	0	0	1	0	0	1	1	0	1	0	0	0	1	1	0	0	0	0	0	0	1	0	0	0
S46_627646	46	0	1	0	0	1	0	1	1	0	1	0	0	1	1	1	1	0	0	0	0	1	0	0	0	0	0	1	0	0	1	0	0	1	0	0	0	1	0	0	0	0	0	0	0	1	0	0	0
S46_652231	46	0	1	0	0	1	-	1	1	0	1	0	0	1	1	0	0	0	0	0	0	1	0	0	0	0	0	1	0	0	1	1	0	1	0	0	0	1	1	0	0	0	0	0	0	1	0	0	0
S46_736975	46	0	1	0	0	1	0	1	1	0	1	0	0	1	0	1	1	0	0	0	0	1	0	0	0	0	0	1	0	0	0	1	0	0	0	0	0	1	1	0	0	0	0	0	0	1	0	0	0
S46_746659	46	0	1	0	0	0	0	1	0	0	1	0	0	1	1	0	1	0	0	0	0	1	0	0	0	0	0	1	0	0	1	1	0	1	0	0	0	1	1	0	0	0	0	0	0	0	0	0	0
S46_760848	46	0	1	0	0	1	0	1	1	0	1	0	0	1	1	-	1	0	0	0	0	0	0	0	0	0	0	1	0	0	1	1	0	1	0	0	0	0	0	0	0	0	0	0	0	1	0	0	0
S46_762088	46	0	1	0	0	0	0	1	0	0	1	0	0	1	1	-	1	0	0	0	0	1	0	0	0	0	0	1	0	0	1	1	0	1	0	0	0	1	1	0	0	0	0	0	0	1	0	0	0
S46_834162	46	0	1	0	0	0	0	1	1	0	1	0	0	1	1	1	0	0	0	0	0	1	0	0	0	0	0	1	0	0	1	1	0	1	0	0	0	1	1	0	0	0	0	0	0	1	0	0	0
S46_880487	46	0	1	0	0	0	0	1	0	0	1	0	0	1	1	1	1	0	0	0	0	1	0	0	0	0	0	1	0	0	1	1	0	1	0	0	0	1	1	0	0	0	0	0	0	1	0	0	0
S46_911237	46	0	1	0	0	0	0	1	0	0	1	0	0	1	1	0	0	0	0	0	0	0	0	0	0	0	0	1	0	0	1	1	0	1	0	0	0	1	1	0	0	0	0	0	0	1	0	0	0
S46_966216	46	0	1	0	0	0	0	1	0	0	1	0	0	1	1	1	1	0	0	0	0	1	0	0	0	0	0	1	0	0	1	1	0	1	0	0	0	1	0	0	0	0	0	0	0	1	0	0	0
S46_1004429	46	0	1	0	0	1	0	1	1	0	1	0	0	1	1	0	1	0	0	0	0	1	0	0	0	0	0	1	0	0	1	1	0	1	0	0	0	1	1	0	0	0	0	0	0	1	0	0	0
S46_1018518	46	0	1	0	0	1	0	1	1	0	1	0	0	1	1	0	1	0	0	0	0	1	0	0	0	0	0	1	0	0	1	1	0	1	0	0	0	1	1	0	0	0	0	0	0	1	0	0	0
S46_1029896	46	0	1	0	0	-	-	1	0	0	1	0	0	1	1	0	1	0	0	0	0	1	0	0	0	0	0	1	0	0	0	1	0	1	0	0	0	1	1	0	0	0	0	0	0	1	0	0	0
S46_1034375	46	0	1	0	0	0	0	1	1	0	1	0	0	1	1	-	0	0	0	0	0	1	0	0	0	0	0	1	0	0	1	1	0	1	0	0	0	1	1	0	0	0	0	0	0	1	0	0	0
S46_1143412	46	0	1	0	0	0	0	1	0	0	1	0	0	1	1	1	1	0	0	0	0	1	0	0	0	0	0	1	0	0	1	1	0	1	0	0	0	1	1	0	0	0	0	0	0	1	0	0	0
S46_1206977	46	0	1	0	0	1	0	1	1	0	1	0	0	1	1	1	1	0	0	0	0	1	0	0	0	0	0	1	0	0	1	1	0	1	0	0	0	1	1	0	0	0	0	0	0	1	0	0	0
S46_1210856	46	0	1	0	0	0	0	1	0	0	1	0	0	1	1	0	1	0	0	0	0	1	0	0	0	0	0	1	0	0	1	1	0	1	0	0	0	1	1	0	0	0	0	0	0	1	0	0	0
S46_1212618	46	0	1	0	0	-	-	1	1	0	1	0	0	1	1	1	1	0	0	0	0	0	0	0	0	0	0	1	0	0	1	1	0	1	0	0	0	1	0	0	0	0	0	0	0	1	0	0	0
S46_1342231	46	0	0	0	0	1	0	1	0	0	0	1	0	0	0	0	0	0	1	0	1	0	0	1	0	0	1	1	1	0	0	0	0	0	0	1	1	1	0	0	0	0	1	1	0	0	0	1	1
S46_1356925	46	0	0	0	0	0	0	1	0	0	0	1	0	0	0	0	0	0	1	0	1	0	0	1	0	0	1	1	1	0	0	0	0	0	0	1	1	1	0	0	0	0	1	1	0	0	0	1	1
S46_1369785	46	0	0	0	0	1	0	1	0	0	0	1	0	0	0	0	0	0	1	0	1	1	0	1	0	0	1	1	1	0	0	0	0	0	0	1	1	1	0	0	0	0	1	1	0	0	0	1	1
S46_1375268	46	0	0	0	0	0	0	1	0	0	0	1	0	0	0	0	0	0	0	0	1	0	0	1	0	0	1	1	1	0	0	0	0	0	0	1	1	1	0	0	0	0	1	1	0	0	0	1	1
S46_1398214	46	0	0	0	0	1	0	1	0	0	0	1	0	0	0	0	0	0	1	0	1	0	0	1	0	0	1	1	1	0	0	0	0	0	0	1	1	1	0	0	0	0	1	1	0	0	0	1	1
S46_1426141	46	0	0	0	0	1	0	1	0	0	0	1	0	0	0	-	0	0	1	0	1	1	0	1	0	0	0	1	-	-	0	0	0	0	0	1	1	1	0	0	0	0	0	1	0	0	0	1	1
S46_1432086	46	0	0	0	0	-	0	1	0	0	0	1	-	0	0	0	0	0	0	0	1	0	0	1	0	0	0	1	1	0	0	0	0	0	0	1	1	1	0	0	0	0	1	1	0	0	0	1	1
S46_1442435	46	0	0	0	0	0	0	0	0	0	0	1	0	0	0	0	0	0	0	0	1	0	0	1	0	0	1	1	1	0	0	0	0	0	0	1	1	1	0	0	0	0	1	1	0	0	0	1	1
S46_1517671	46	0	0	0	0	1	0	1	0	0	0	1	0	0	0	0	0	0	1	0	1	0	0	1	0	0	1	1	1	0	0	0	0	0	0	1	1	1	0	0	0	0	1	1	0	0	0	1	1
S46_1530409	46	0	0	0	0	1	0	1	0	0	0	1	0	0	0	-	0	0	0	0	1	0	0	1	0	0	1	1	1	0	0	0	0	0	0	1	1	1	0	0	0	0	1	1	0	0	0	0	1
S46_1541227	46	0	0	0	0	-	0	1	0	0	0	1	0	0	0	0	-	0	1	0	1	0	0	1	0	0	1	1	1	0	0	0	0	0	0	0	1	1	-	0	0	0	1	1	0	0	0	0	1
S46_1556111	46	0	0	0	0	1	0	1	0	0	0	1	0	0	0	0	0	0	1	0	1	0	0	1	0	0	1	1	1	0	0	0	0	0	0	1	1	1	0	0	0	0	1	1	0	0	0	1	1
S46_1582144	46	0	0	0	0	1	0	1	0	0	0	1	0	0	0	0	0	0	1	0	1	0	0	1	0	0	1	1	1	0	0	0	0	0	0	1	1	1	0	0	0	0	1	1	0	0	0	1	1
S46_1583328	46	0	0	0	0	1	0	1	0	0	0	1	0	0	0	0	0	0	1	0	1	1	0	1	0	0	1	1	1	0	0	0	0	0	0	1	1	1	0	0	0	0	1	1	0	0	0	1	1
S46_1583651	46	0	0	0	0	1	0	1	0	0	0	1	0	0	0	0	0	0	1	0	1	0	0	1	0	0	1	1	1	0	0	0	0	0	0	1	1	1	0	0	0	0	1	1	0	0	0	1	1
S46_1612415	46	0	0	0	0	0	0	1	0	0	0	1	0	0	0	0	0	0	1	0	0	0	0	0	0	0	1	1	1	0	0	0	0	0	0	1	0	1	0	0	0	0	0	1	0	0	0	1	0
S46_1665013	46	0	0	0	0	0	0	1	0	0	0	1	0	0	0	0	0	0	1	0	1	1	0	1	0	0	1	0	1	0	0	0	0	0	0	1	1	1	0	0	0	0	1	1	0	0	0	1	1
S46_1700565	46	0	0	0	0	1	0	1	0	0	0	1	0	0	0	0	0	0	0	0	1	0	0	1	0	0	1	0	1	0	0	0	0	0	0	1	1	0	0	0	0	0	1	1	0	0	0	1	1
S46_1743629	46	0	0	0	0	1	-	1	0	0	0	1	0	0	0	0	0	0	0	0	1	0	0	1	0	0	1	1	1	0	0	0	0	0	0	1	1	1	0	0	0	0	1	1	0	0	0	1	1
S46_1744333	46	0	0	0	0	1	0	1	0	0	0	1	0	0	0	-	0	0	1	0	1	0	0	1	0	0	1	1	1	0	0	0	0	0	0	1	1	1	0	0	0	0	1	1	0	0	0	1	1
S46_1744439	46	-	0	0	0	1	0	0	0	0	0	1	0	0	0	-	0	0	1	0	1	1	0	1	0	0	1	1	1	0	-	0	0	0	0	1	1	1	0	0	0	0	1	1	0	0	0	0	1
S46_1755726	46	0	0	0	0	1	0	1	0	0	0	1	0	0	0	0	0	0	1	0	1	0	0	1	0	0	1	1	1	0	0	0	0	0	0	1	1	1	0	0	0	0	1	1	0	0	0	1	1
S46_1759865	46	0	0	0	0	1	0	1	0	0	0	1	0	0	0	0	0	0	1	0	1	1	0	1	0	0	1	1	1	0	0	0	0	0	0	1	1	1	0	0	0	0	1	1	0	0	0	1	1
S46_1760651	46	0	0	0	0	1	-	1	0	0	0	1	0	0	0	0	0	0	0	0	0	1	0	1	0	0	0	1	1	0	0	0	0	0	0	1	1	1	0	0	0	0	0	1	0	0	0	0	1
S46_1760767	46	0	0	0	0	0	0	1	0	0	0	1	-	0	0	0	0	0	1	0	1	0	0	1	0	0	1	1	0	0	0	0	0	0	0	1	1	0	0	0	0	0	1	1	0	0	0	1	1
S46_1795032	46	0	0	0	0	1	0	1	0	0	0	0	0	0	0	0	0	0	1	0	0	0	0	1	0	0	1	1	1	0	0	0	0	0	0	1	1	1	0	0	0	0	0	1	0	-	0	1	0
S46_1811931	46	0	0	0	0	-	-	1	0	0	0	1	0	0	0	-	-	0	1	0	1	1	0	1	0	0	1	1	1	0	0	0	0	0	0	1	1	1	0	0	0	0	1	0	0	0	0	0	1
S46_1812098	46	0	0	0	0	0	0	1	0	0	0	1	0	0	0	0	0	0	1	0	1	0	0	1	0	0	1	1	1	0	0	0	0	0	0	1	1	1	0	0	0	0	1	0	0	0	0	0	1
S46_1854039	46	0	0	0	0	1	0	1	0	0	0	1	0	0	0	0	0	0	1	0	1	0	0	1	0	0	1	1	1	0	0	0	0	0	0	1	1	1	0	0	1	0	1	1	0	0	0	1	1
S46_1858048	46	0	0	0	0	0	0	1	0	0	0	1	0	0	0	0	0	0	1	0	1	0	0	1	0	0	1	1	1	0	0	0	0	0	0	1	1	1	0	0	1	0	1	1	0	0	0	0	1
S46_1869852	46	0	0	0	0	0	0	1	0	0	0	1	0	0	0	0	0	0	1	0	1	0	0	1	0	0	1	0	1	0	0	0	0	0	0	1	1	1	0	0	1	0	1	1	0	0	0	1	1
S46_1869999	46	0	0	0	0	1	0	1	0	0	0	1	0	0	0	0	0	0	1	0	1	1	0	1	0	0	1	1	1	0	0	0	0	0	0	1	1	1	0	0	1	0	1	1	0	0	0	1	1
S46_1878921	46	0	0	0	0	0	0	1	0	0	0	1	0	0	0	0	0	0	1	0	1	1	0	1	0	0	1	1	1	0	0	0	0	0	0	1	1	1	0	0	0	0	1	0	0	0	0	0	1
S46_1950890	46	0	0	0	0	0	0	1	0	0	0	1	0	0	0	0	0	0	1	0	1	1	0	1	0	0	1	1	1	0	0	0	0	0	0	1	1	1	0	0	0	0	1	1	0	0	0	1	1
S46_1959643	46	0	0	0	0	1	0	1	0	0	0	1	0	0	0	-	0	0	1	0	1	0	0	1	0	0	1	1	1	0	0	0	0	0	0	1	1	1	0	0	1	0	1	1	0	0	0	1	1
S46_1961631	46	0	0	0	0	1	0	1	0	0	0	1	0	0	0	0	0	0	1	0	1	1	0	1	0	0	1	1	1	0	0	0	0	0	0	1	1	1	0	0	1	0	1	1	0	0	0	1	1
S46_2003932	46	0	0	0	0	0	0	1	0	0	0	1	0	0	0	-	0	0	0	0	1	1	0	1	0	0	1	1	1	0	0	0	0	0	0	1	1	1	0	0	1	0	1	1	0	0	0	0	1
S46_2029415	46	0	0	0	0	1	0	1	0	0	0	1	0	0	0	0	0	0	1	0	1	1	0	1	0	0	1	1	1	0	0	0	0	0	0	1	1	1	0	0	1	0	1	1	0	0	0	0	1
S46_2038154	46	-	0	0	0	-	0	1	0	0	0	1	0	0	0	0	0	0	-	0	1	0	0	1	0	0	1	1	1	0	0	0	0	0	0	1	1	0	0	0	1	0	1	1	0	0	0	0	1
S46_2094464	46	0	0	0	0	1	0	1	0	0	0	1	0	0	0	-	0	0	1	0	1	1	0	1	0	0	1	0	1	-	0	0	0	0	0	1	0	1	0	0	1	0	1	1	0	-	0	0	1
S46_2094837	46	0	0	0	0	0	0	1	0	0	0	1	0	0	0	0	0	0	1	0	1	0	0	1	0	0	1	1	1	0	0	0	0	0	0	1	1	1	0	0	1	0	1	1	0	0	0	0	1
S46_2096277	46	0	0	0	0	1	0	1	0	0	0	1	0	0	0	-	-	0	1	0	1	0	0	1	0	0	0	1	1	0	0	0	0	0	0	1	1	1	0	0	1	0	1	1	0	0	0	0	1
S46_2104422	46	0	0	0	0	1	-	1	0	0	0	1	-	0	0	0	0	0	0	0	1	0	0	1	0	0	1	1	1	0	-	0	0	0	-	1	1	1	0	0	0	0	1	1	0	0	0	0	1
S46_2106070	46	0	0	1	0	0	0	1	0	0	0	1	-	-	0	0	0	0	1	0	1	0	0	1	0	0	1	1	1	0	0	0	0	0	0	1	1	1	0	0	1	0	1	1	0	0	0	0	1
S46_2111473	46	0	0	0	0	1	0	1	0	0	0	1	0	0	0	0	0	0	1	0	1	1	0	1	0	0	1	0	1	0	0	0	0	0	0	1	1	1	0	0	1	0	1	1	0	0	0	0	1
S46_2123702	46	0	0	0	0	1	0	1	0	0	0	1	0	0	0	0	0	0	1	0	1	0	0	1	0	0	1	1	1	0	0	0	0	0	0	1	1	1	0	0	1	0	1	1	0	0	0	0	1
S46_2134746	46	0	0	0	0	1	0	1	0	0	0	1	0	0	0	0	0	0	1	0	1	0	0	1	0	0	1	1	1	0	0	0	0	0	0	1	1	1	0	0	1	0	1	1	0	0	0	0	1
S46_2148283	46	0	0	0	0	1	0	1	0	0	0	1	0	0	0	0	0	0	1	0	1	1	0	1	0	0	1	1	1	0	0	0	0	0	0	1	1	1	0	0	1	0	1	1	0	0	0	0	1
S46_2154405	46	0	0	0	0	-	0	1	0	0	0	1	0	0	0	-	0	0	1	0	1	0	0	1	0	0	1	1	1	0	0	0	0	0	0	1	1	1	0	0	1	0	1	1	0	0	0	0	0
S46_2180139	46	0	0	0	0	1	0	1	0	0	0	1	0	0	0	0	0	0	1	0	1	1	0	1	0	0	1	1	1	-	0	0	0	0	0	1	1	1	0	0	1	0	1	1	0	0	0	0	1
S46_2217747	46	0	0	0	0	1	0	1	0	0	0	1	0	0	0	0	0	0	1	0	1	0	0	1	0	0	1	1	1	0	0	0	0	0	0	1	1	1	0	0	1	0	1	1	0	0	0	0	1
S46_2217904	46	0	0	0	0	1	0	1	0	0	0	1	0	0	0	0	0	0	1	0	1	0	0	1	0	0	1	1	1	0	0	0	0	0	0	1	1	1	0	0	1	0	1	1	0	0	0	0	1
S46_2233512	46	-	0	0	0	1	0	1	0	0	0	1	0	0	0	0	0	0	1	0	1	0	0	1	0	0	1	1	1	0	0	0	0	0	0	1	1	1	0	0	1	0	1	1	0	0	0	0	1
S46_2239027	46	-	0	0	0	1	0	1	0	0	0	1	0	0	0	-	0	0	1	0	1	0	0	1	0	0	0	1	1	0	0	0	0	0	0	1	1	1	0	0	1	0	1	0	0	0	0	0	1
S46_2239167	46	-	0	0	0	0	-	1	0	0	0	1	0	0	0	-	0	0	1	0	1	0	0	1	0	0	1	1	1	0	0	0	0	0	0	1	1	1	0	0	1	0	1	1	0	0	0	0	1
S46_2239463	46	0	0	-	0	0	0	1	0	0	0	1	0	0	0	-	0	0	1	0	1	0	0	1	0	0	1	1	1	0	0	0	0	0	0	1	1	1	0	0	1	0	1	1	0	0	0	0	1
S46_2239598	46	0	0	0	0	0	0	1	0	0	0	1	0	0	0	0	0	0	1	0	1	0	0	1	0	0	1	1	1	0	0	0	0	0	0	1	1	1	0	0	1	0	1	1	0	0	0	0	1
S46_2265913	46	0	0	0	0	-	0	0	0	0	0	1	0	0	0	0	0	0	0	0	1	1	0	1	0	0	1	1	1	0	0	0	0	0	0	1	1	1	0	0	1	0	1	1	0	0	0	0	1
S46_2266060	46	0	0	0	0	-	0	1	0	0	0	0	0	0	0	0	0	0	0	0	1	0	0	1	0	0	1	1	1	0	0	0	0	0	0	1	1	1	0	0	1	0	1	1	0	0	0	0	1
S46_2282338	46	0	0	0	0	0	0	1	0	0	0	1	0	0	0	-	0	0	1	0	1	1	0	1	0	0	1	1	1	0	0	0	0	0	0	1	1	1	0	0	1	0	1	1	0	0	0	0	1
S46_2294102	46	-	0	0	0	0	0	1	0	0	0	1	0	0	0	-	0	0	1	0	0	1	0	1	0	0	1	1	1	0	0	0	0	0	0	1	1	1	0	0	1	0	1	0	0	0	0	0	1
S46_2320788	46	0	0	0	0	0	0	1	0	0	0	1	0	0	0	0	0	0	1	0	1	0	0	1	0	0	1	1	1	0	0	0	0	0	0	1	1	1	0	0	1	0	1	1	0	0	0	0	1
S46_2320915	46	0	0	0	0	1	0	1	0	0	0	1	0	0	0	0	0	0	1	0	1	0	0	1	0	0	1	1	1	0	0	0	0	0	0	1	1	1	0	0	1	0	1	1	0	0	0	0	1
S46_2334270	46	0	0	0	0	0	0	1	0	0	0	1	0	0	0	0	0	0	1	0	1	0	0	1	0	0	1	1	1	0	0	0	0	0	0	1	1	1	0	0	0	0	1	0	0	0	0	0	1
S46_2338121	46	0	0	0	0	0	0	1	0	0	0	1	0	0	0	0	0	0	1	0	1	1	0	1	0	0	1	1	1	0	0	0	0	0	0	1	1	1	0	0	1	0	1	0	0	0	0	0	1
S46_2366763	46	0	0	0	0	0	0	1	0	0	0	1	0	0	0	0	0	0	1	0	1	1	0	1	0	0	1	1	1	0	0	0	0	0	0	1	1	1	0	0	1	0	1	1	0	0	0	0	1
S46_2370521	46	0	0	0	0	0	0	1	0	0	0	1	0	0	0	0	0	0	1	0	1	1	0	1	0	0	1	1	1	0	0	0	0	0	0	1	1	1	0	0	1	0	1	1	0	0	0	0	1
S46_2389261	46	0	0	0	0	1	0	1	0	0	0	1	0	0	0	0	0	0	1	0	1	1	0	1	0	0	1	1	1	0	0	0	0	0	0	1	1	1	0	0	1	0	1	1	0	0	0	0	1
S46_2444926	46	0	0	0	0	1	0	1	0	0	0	1	0	0	0	0	0	0	1	0	1	1	0	1	0	0	1	1	1	0	0	0	0	0	0	1	1	1	0	0	1	0	1	1	0	0	0	0	1
S46_2448757	46	0	0	0	0	0	0	1	0	0	0	1	0	0	0	0	0	0	1	0	1	0	0	1	0	0	1	1	1	0	-	0	0	0	0	1	1	1	0	0	0	0	1	1	0	0	0	0	0
S46_2449287	46	0	0	0	0	1	0	1	0	0	0	1	0	0	0	0	0	0	1	0	1	1	0	1	0	0	1	1	0	0	0	0	0	0	0	1	1	1	0	0	1	0	1	1	0	0	0	0	1
S46_2451597	46	0	0	0	0	1	0	1	0	0	0	1	0	0	0	0	0	0	1	0	1	1	0	1	0	0	1	1	1	0	0	0	0	0	0	1	1	1	0	0	1	0	1	0	0	0	0	0	1
S46_2471468	46	0	0	0	0	1	0	1	0	0	0	1	0	0	0	0	0	0	1	0	1	0	0	1	0	0	0	1	1	0	0	0	0	0	0	1	0	1	0	0	1	0	1	1	0	0	0	0	1
S46_2517077	46	0	0	0	0	0	0	1	0	0	0	1	0	0	0	0	0	0	1	0	1	0	0	1	0	0	1	1	1	0	0	0	0	0	0	0	1	1	0	0	1	0	1	0	0	0	0	0	1
S46_2561217	46	0	0	0	0	0	0	1	0	0	0	1	0	0	0	0	0	0	1	0	1	1	0	1	0	0	1	1	1	0	0	0	0	0	0	0	1	1	0	0	1	0	1	1	0	0	0	0	1
S46_2572557	46	0	0	0	0	1	0	1	0	0	0	1	0	0	0	0	0	0	1	0	1	0	0	1	0	0	1	1	1	0	0	0	0	0	0	0	1	1	0	0	1	0	1	1	0	0	0	0	1
S46_2578336	46	0	0	0	0	1	0	1	0	0	0	1	0	0	0	0	0	0	1	0	1	0	0	1	0	0	1	1	1	0	0	0	0	0	0	0	1	1	0	0	1	0	1	1	0	0	0	0	1
S46_2581215	46	0	0	0	0	1	0	1	0	0	0	1	0	0	0	0	0	0	1	0	1	0	0	1	0	0	1	1	1	0	0	0	0	0	0	0	1	1	0	0	1	0	1	1	0	0	0	0	1
S46_2581320	46	0	0	0	0	1	0	1	0	0	0	1	0	0	0	0	0	0	1	0	1	0	0	1	0	0	1	1	1	0	0	0	0	0	0	0	1	1	0	0	1	0	1	1	0	0	0	0	1
S46_2608490	46	0	0	0	0	1	0	1	0	0	0	1	0	0	0	0	0	0	0	0	1	0	0	1	0	0	1	1	1	0	0	0	0	0	0	0	1	0	0	0	1	0	1	1	0	0	0	0	0
S46_2667447	46	0	0	0	0	1	0	1	0	0	0	1	0	0	0	0	0	0	1	0	1	1	0	1	0	0	1	0	1	0	1	0	0	0	0	0	1	1	0	0	1	0	1	1	0	0	0	0	1
S46_2669251	46	0	0	0	0	1	0	1	0	0	0	1	0	0	0	0	0	0	1	0	1	0	0	1	0	0	1	0	1	0	1	0	0	0	0	0	1	1	0	0	1	0	1	1	0	0	0	0	1
S46_2685057	46	0	0	0	0	1	0	1	0	0	0	1	0	0	0	0	0	0	0	0	1	0	0	1	0	0	1	0	1	0	0	0	0	0	0	0	1	1	0	0	1	0	1	1	0	0	0	0	1
S46_2685359	46	0	0	0	0	0	0	1	0	0	0	1	0	0	0	0	0	0	1	0	1	1	0	1	0	0	1	0	1	0	1	0	0	0	0	0	1	1	0	0	1	0	1	1	0	0	0	0	1
S46_2686020	46	0	0	0	0	1	0	1	0	0	0	1	0	0	0	0	0	0	1	0	1	1	0	1	0	0	1	0	1	0	1	0	0	0	0	0	1	1	0	0	1	0	1	1	0	0	0	0	1
S46_2689080	46	0	0	0	0	1	0	1	0	0	0	1	0	0	0	0	0	0	1	0	1	1	0	1	0	0	1	0	1	0	1	0	0	0	0	0	1	1	0	0	1	0	1	1	0	0	0	0	1
S46_2695202	46	0	0	0	0	1	0	1	0	0	0	1	0	0	0	0	0	0	1	0	1	0	0	1	0	0	1	0	1	0	1	0	0	0	0	0	1	1	0	0	1	0	1	1	0	0	0	0	1
S46_2704275	46	0	0	0	0	1	0	1	0	0	0	1	0	0	0	0	0	0	1	0	1	0	0	1	0	0	1	0	0	0	1	0	0	0	0	0	1	0	0	0	1	0	1	1	0	0	0	0	1
S46_2710612	46	0	0	0	0	1	0	1	0	0	0	1	0	0	0	0	0	0	1	0	1	0	0	1	0	0	1	0	1	0	1	0	0	0	0	0	1	1	0	0	1	0	1	1	0	0	0	0	1
S46_2817817	46	0	0	0	0	0	0	1	0	0	0	1	0	0	0	0	0	0	1	0	1	0	0	1	0	0	1	0	1	0	1	0	0	0	0	0	1	1	0	0	1	0	1	1	0	0	0	0	1
S46_2841886	46	0	0	0	0	0	0	1	0	0	0	1	0	0	0	0	0	0	0	0	1	0	0	1	0	0	1	0	1	0	1	0	0	0	0	0	1	1	0	0	1	0	1	1	0	0	0	0	1
S46_2876805	46	0	0	0	0	0	0	1	0	0	0	1	0	0	0	0	0	0	0	0	1	0	0	1	0	0	1	0	1	0	1	0	0	0	0	0	1	1	0	0	1	0	1	1	0	0	0	0	1
S46_2918886	46	0	0	0	0	1	0	1	0	0	0	1	0	0	0	0	0	0	1	0	1	0	0	1	0	0	1	0	1	0	1	0	0	0	0	0	1	1	0	0	1	0	1	1	0	0	0	0	1
S46_2924164	46	0	0	0	0	1	0	1	0	0	0	1	0	0	0	0	0	0	1	0	1	1	0	1	0	0	1	0	1	0	1	0	0	0	0	0	1	1	0	0	1	0	1	1	0	0	0	0	1
S46_2929473	46	0	0	0	0	0	-	1	0	-	0	1	0	0	0	-	0	0	0	0	1	1	0	1	0	0	1	0	1	0	0	0	0	0	0	0	1	1	0	0	1	0	1	1	0	0	0	0	1
S46_2938358	46	0	0	1	0	1	0	1	0	0	0	1	0	0	1	0	0	0	1	0	1	1	0	1	0	0	1	0	1	0	1	0	0	0	0	0	1	1	0	0	1	0	1	1	0	0	0	0	1
S46_2955160	46	0	0	0	0	1	0	1	0	0	0	1	0	0	1	0	0	0	1	0	1	0	0	1	0	0	1	0	1	0	1	0	0	0	0	0	1	1	0	0	1	0	1	1	0	0	0	0	1
S46_3013237	46	0	0	0	0	-	-	1	0	0	0	1	0	0	1	-	0	0	0	0	1	1	0	1	0	0	1	0	1	0	1	0	0	0	0	0	1	1	0	0	0	0	1	0	0	0	0	0	0
S46_3014232	46	0	0	0	0	0	-	1	0	0	0	1	0	0	1	0	0	0	1	0	1	0	0	1	0	0	1	0	1	-	1	0	0	0	0	0	1	1	0	0	1	0	0	1	0	0	0	0	0
S46_3019017	46	0	0	0	0	1	0	1	0	0	0	1	0	0	1	0	0	0	1	0	1	1	0	1	0	0	1	0	1	0	1	0	0	0	0	0	1	1	0	0	1	0	1	1	0	0	0	0	1
S46_3027490	46	0	0	0	0	-	0	0	0	0	0	1	0	0	1	0	0	0	0	0	1	0	0	1	0	0	1	0	0	0	0	0	0	0	0	0	1	1	0	0	1	0	1	1	0	0	0	0	1
S46_3050576	46	0	0	0	0	1	0	1	0	0	0	1	0	0	1	0	0	0	1	0	1	1	0	1	0	0	1	0	1	0	1	0	0	0	0	0	1	1	0	0	1	0	1	1	0	0	0	0	1
S46_3067805	46	0	0	0	0	1	0	1	0	0	0	1	0	0	1	0	0	0	1	0	1	1	0	1	0	0	1	0	1	0	1	0	0	0	0	0	1	1	0	0	1	0	1	1	0	0	0	0	1
S46_3079665	46	0	0	0	0	0	0	1	0	0	0	1	0	0	1	0	0	0	1	0	1	0	0	1	0	0	0	0	1	0	1	0	0	0	0	0	0	0	0	0	1	0	1	0	0	0	0	0	1
S46_3081423	46	0	0	0	0	1	0	1	0	0	0	1	0	0	1	0	0	0	1	0	1	0	0	1	0	0	1	0	1	0	1	0	0	0	0	0	1	1	0	0	1	0	1	1	0	0	0	0	1
S46_3086856	46	0	0	0	0	1	0	1	0	0	0	1	0	0	1	0	0	0	1	0	1	1	0	1	0	0	1	0	1	0	1	0	0	0	0	0	1	1	0	0	1	0	1	1	0	0	0	0	1
S46_3099522	46	0	0	0	0	1	0	1	0	0	0	1	0	0	1	0	0	0	1	0	1	0	0	1	0	0	1	0	1	0	1	0	0	0	0	0	1	1	0	0	1	0	1	1	0	0	0	0	1
S46_3103006	46	0	0	0	0	1	0	1	0	0	0	1	0	0	0	-	0	0	1	0	1	0	0	1	0	0	1	0	0	0	0	0	0	0	0	0	1	1	0	0	1	0	1	1	0	0	0	0	1
S46_3103612	46	0	0	0	0	0	0	1	0	0	0	1	0	0	1	0	0	0	1	0	1	1	0	1	0	0	1	0	1	0	0	0	0	0	0	0	1	1	0	0	0	0	1	0	0	0	0	0	1
S46_3107887	46	0	0	0	0	1	0	1	0	0	0	1	0	0	1	0	0	0	1	0	1	1	0	1	0	0	1	0	1	0	1	0	0	0	0	0	1	1	0	0	1	0	1	1	0	0	0	0	1
S46_3136523	46	0	0	0	0	1	0	1	0	0	0	1	0	0	1	0	0	0	1	0	1	0	0	1	0	0	1	0	1	0	0	0	0	0	0	0	1	1	0	0	1	0	1	1	0	0	0	0	1
S46_3151677	46	0	0	0	0	0	0	1	0	0	0	1	0	0	1	1	0	0	1	0	1	0	0	1	0	0	1	0	1	0	-	0	0	0	0	0	1	1	0	0	1	0	1	1	0	0	0	0	1
S46_3228082	46	0	0	0	0	-	0	1	0	0	0	1	-	0	1	0	0	0	1	0	1	0	0	1	0	0	1	0	1	0	0	0	0	0	0	0	1	0	0	0	1	0	1	1	0	0	0	0	1
S46_3243258	46	0	0	0	0	1	0	1	0	0	0	1	0	0	1	0	0	0	1	0	1	1	0	1	0	0	1	0	1	0	1	0	0	0	0	0	1	1	0	0	1	0	1	1	0	0	0	0	1
S46_3243384	46	0	0	0	0	0	0	1	0	0	0	1	0	0	1	0	0	0	1	0	1	0	0	1	0	0	1	0	1	0	1	0	0	0	0	0	1	1	0	0	0	0	1	0	0	0	0	0	1
S46_3252931	46	0	0	0	0	0	0	1	0	0	0	1	0	0	1	1	0	0	1	0	1	0	0	1	0	0	1	0	1	0	1	0	0	0	0	0	1	1	0	0	0	0	1	0	0	0	0	0	1
S46_3253123	46	0	0	0	0	0	0	1	0	0	0	1	0	0	1	0	0	0	1	0	1	0	0	1	0	0	1	0	1	0	1	0	0	0	0	0	1	1	0	0	0	0	1	0	0	0	0	0	1
S46_3253316	46	0	0	0	0	1	0	1	0	0	0	1	0	0	0	0	0	0	0	0	1	0	0	1	0	0	1	0	1	0	1	0	0	0	0	0	1	1	0	0	1	0	1	1	0	0	0	0	1
S46_3257234	46	0	0	0	0	-	0	1	0	0	0	1	0	0	1	0	0	0	1	0	0	1	0	1	0	0	0	0	0	0	1	0	0	0	0	0	1	0	0	0	1	-	1	1	0	0	0	0	1
S46_3263628	46	0	0	0	0	0	0	1	0	0	0	1	0	0	1	1	0	0	1	0	1	0	0	1	0	0	1	0	1	0	1	0	0	0	0	0	1	1	0	0	1	0	1	1	0	0	0	0	1
S46_3276846	46	0	0	0	0	1	0	1	0	0	0	1	0	0	1	1	0	0	1	0	1	0	0	1	0	0	1	0	1	0	1	0	0	0	0	0	1	1	1	0	1	0	1	1	0	0	0	0	1
S46_3304180	46	0	0	0	0	0	0	1	0	0	0	1	0	0	1	1	0	0	1	0	1	1	0	1	0	0	1	0	1	0	1	0	0	0	0	0	1	1	1	0	1	0	1	1	0	0	0	0	1
S46_3316350	46	0	0	0	0	1	0	0	0	0	0	0	0	1	1	0	1	0	0	1	0	0	0	0	0	0	0	1	0	1	1	0	1	0	0	1	0	0	0	0	0	1	0	0	0	0	0	0	-
S46_3351961	46	0	0	0	0	1	0	1	0	0	0	1	0	0	1	1	0	0	1	0	1	1	0	1	0	0	1	0	1	0	1	0	0	0	0	0	1	1	1	0	1	0	1	1	0	0	0	0	1
S46_3362719	46	0	0	0	0	0	0	1	0	0	0	1	0	0	1	0	0	0	1	0	1	0	0	1	0	0	1	0	1	0	1	0	0	0	0	0	1	1	0	0	0	0	1	0	0	0	0	0	1
S46_3381616	46	0	0	0	0	0	0	1	0	0	-	1	0	0	1	1	0	0	1	0	1	0	0	1	0	0	1	0	1	0	0	0	0	0	0	0	1	1	1	0	1	0	1	1	0	0	0	0	1
S46_3394553	46	0	0	0	0	-	0	0	0	0	0	1	0	0	1	0	0	0	1	0	1	1	0	1	0	0	1	0	1	0	-	0	0	0	-	0	1	0	1	0	1	0	1	1	0	0	0	0	1
S46_3394672	46	-	0	0	0	-	0	1	0	-	0	0	0	0	1	-	0	0	1	0	1	0	0	1	0	-	1	0	1	0	0	0	0	0	0	0	1	1	1	0	0	0	1	1	0	0	0	0	0
S46_3412562	46	0	0	0	0	-	0	0	0	0	0	1	0	0	1	1	0	0	1	0	1	0	0	1	0	0	1	0	1	0	0	0	0	0	0	0	0	1	1	0	1	0	1	1	0	0	0	0	1
S46_3417585	46	0	0	0	0	1	0	1	0	0	0	1	0	0	1	1	0	0	1	0	1	1	0	1	0	0	1	0	1	0	1	0	0	0	0	0	1	1	1	0	1	0	1	1	0	0	0	0	1
S46_3427797	46	0	0	0	0	0	0	-	0	0	0	1	0	0	1	-	0	0	1	0	1	0	-	1	0	0	1	0	1	0	1	0	0	0	0	0	1	1	0	1	1	0	1	1	0	0	0	0	1
S46_3427901	46	-	0	0	0	0	-	1	0	0	0	1	0	0	1	-	0	0	0	0	1	1	0	1	0	0	1	0	1	0	1	0	0	0	-	0	1	1	1	1	1	0	0	1	0	0	0	0	1
S46_3445896	46	0	0	0	0	0	0	1	0	0	0	1	0	0	1	-	0	0	0	0	1	0	0	1	0	0	1	0	1	0	0	0	0	0	0	0	1	1	1	1	1	0	1	1	0	0	0	0	1
S46_3449044	46	0	0	0	0	1	0	1	0	0	0	1	0	0	1	0	0	0	1	0	1	1	0	1	0	0	1	0	1	0	1	0	0	0	0	0	1	1	0	1	1	0	1	1	0	-	0	0	1
S46_3452760	46	0	0	0	0	1	0	1	0	0	0	1	0	0	1	1	0	0	1	0	1	0	0	1	0	0	1	0	1	0	1	0	0	0	0	0	1	1	1	1	1	0	1	1	0	0	0	0	1
S46_3458792	46	0	0	0	0	1	0	1	0	0	0	1	0	0	1	0	0	0	1	0	1	0	0	1	0	0	1	0	1	0	1	0	0	0	0	0	1	1	1	1	1	0	1	1	0	0	0	0	1
S46_3459555	46	0	0	0	0	0	-	1	0	0	0	1	0	0	0	0	0	0	0	0	1	1	0	1	0	0	1	0	1	0	-	0	0	0	0	0	1	1	0	1	1	0	1	1	0	0	0	0	1
S46_3463003	46	0	0	0	0	-	0	0	0	0	0	1	0	0	0	-	0	0	1	0	1	0	0	1	0	0	1	0	1	0	1	0	0	0	0	0	1	1	0	1	1	0	1	1	0	0	0	0	0
S46_3493666	46	0	0	0	0	1	0	1	0	0	0	1	0	0	1	1	0	0	1	0	1	1	0	1	0	0	1	0	1	0	1	0	0	0	0	0	1	1	1	1	1	0	1	1	0	0	0	0	1
S46_3494376	46	0	0	0	0	0	0	0	0	0	0	1	0	0	0	0	0	0	1	0	0	1	0	1	0	0	1	0	1	0	0	0	0	0	0	0	1	1	1	1	1	0	1	1	0	0	0	0	1
S46_3495672	46	0	0	0	0	1	0	1	0	0	0	1	0	0	0	1	0	0	1	0	0	1	0	1	0	0	1	0	1	0	0	0	0	0	0	0	1	1	1	1	1	0	1	1	0	0	0	0	1
S46_3498915	46	0	0	0	0	-	0	1	0	0	0	1	0	0	1	-	0	0	0	0	1	1	0	1	0	0	1	0	1	0	1	0	0	0	0	0	1	1	1	1	1	0	1	1	0	0	0	0	1
S46_3519232	46	0	0	0	0	1	0	1	0	0	0	1	0	0	1	1	0	0	1	0	1	1	0	1	0	0	1	0	1	0	1	0	0	0	0	0	1	1	1	1	1	0	1	1	0	0	0	0	1
S46_3519391	46	0	0	0	0	1	0	1	0	0	0	1	0	0	1	1	0	0	1	0	1	1	0	1	0	0	1	0	1	0	1	0	0	0	0	0	1	1	1	1	1	0	1	1	0	0	0	0	1
S46_3548726	46	0	0	0	0	0	0	1	0	0	0	1	0	0	1	-	0	0	1	0	1	0	0	1	0	0	1	0	1	0	1	0	0	0	0	0	1	1	1	1	1	0	1	1	0	0	0	0	0
S46_3548834	46	0	0	0	0	0	-	1	0	0	0	1	0	0	1	0	0	0	1	0	1	1	0	1	0	0	1	0	1	0	1	0	0	0	0	0	1	1	1	1	1	0	1	1	0	0	0	0	1
S46_3559379	46	0	0	0	0	1	0	1	0	0	0	1	0	0	1	0	0	0	0	0	1	0	0	1	0	0	1	0	1	0	1	0	0	0	0	0	1	1	1	1	1	0	1	1	0	0	0	0	1
S46_3602907	46	0	0	0	0	0	0	1	0	0	0	1	0	0	1	1	0	0	1	0	1	1	0	1	0	0	1	0	1	0	1	0	0	0	0	0	1	1	1	1	1	0	1	1	0	0	0	0	1
S46_3603055	46	0	0	0	0	-	0	1	0	0	0	1	0	0	0	1	0	0	1	0	1	1	0	1	0	0	1	0	1	0	1	0	0	0	0	0	1	0	1	1	1	0	1	1	0	0	0	0	1
S46_3650742	46	0	0	0	0	0	0	1	0	0	0	1	0	0	1	0	0	0	1	0	1	0	0	1	0	0	1	0	1	0	1	0	0	0	0	0	1	1	1	1	1	0	1	1	0	0	0	0	1
S46_3670624	46	-	0	0	0	1	-	0	0	0	-	1	-	0	1	0	0	0	0	0	1	0	-	1	0	0	1	0	0	0	1	0	0	-	-	0	1	1	-	1	0	0	1	1	0	0	0	0	0
S46_3712731	46	0	0	0	0	1	0	1	0	0	0	1	0	0	1	1	0	0	1	0	1	0	0	1	0	0	1	0	1	0	1	0	0	0	0	0	1	1	1	1	1	0	1	1	0	0	0	0	1
S46_3713538	46	0	0	0	0	1	0	1	0	0	0	1	0	0	1	1	0	0	1	0	1	1	0	1	0	0	1	0	1	0	1	0	0	0	0	0	1	1	1	1	0	0	1	0	0	0	0	0	1
S46_3722704	46	0	0	0	0	1	0	1	0	0	0	1	0	0	1	1	0	0	1	0	1	1	0	1	0	0	1	0	1	0	1	0	0	0	0	0	1	1	1	1	1	0	1	1	0	0	0	0	1
S46_3723108	46	0	0	0	0	1	0	1	0	0	0	1	0	0	1	1	0	0	1	0	1	0	0	1	0	0	1	0	1	0	1	0	0	0	0	0	1	1	1	1	1	0	1	1	0	0	0	0	1
S46_3735149	46	0	0	0	0	0	0	1	0	0	-	1	0	0	1	0	0	0	1	0	1	1	0	1	0	0	1	0	1	0	1	0	0	0	0	0	1	1	1	1	1	0	1	1	0	0	0	0	1
S46_3759365	46	0	0	0	0	-	0	1	0	0	0	1	0	0	1	-	0	0	1	0	1	1	0	1	0	0	0	0	1	0	1	0	0	0	0	0	1	1	0	1	1	0	1	1	0	-	0	0	1
S46_3783395	46	0	0	0	0	1	0	1	0	0	0	1	0	0	1	-	0	0	1	0	1	0	0	1	0	0	1	0	1	0	1	0	0	0	0	0	1	1	1	1	1	0	1	1	0	0	0	0	1
S46_3784931	46	0	0	0	0	0	0	1	0	0	0	1	0	0	1	1	0	0	1	0	1	1	0	1	0	0	1	0	1	0	1	0	0	0	0	0	1	1	0	0	0	0	1	0	0	0	0	0	1
S46_3808169	46	0	0	0	0	0	0	1	0	0	0	1	0	0	1	-	0	0	1	0	1	0	0	1	0	0	1	0	1	0	1	0	0	0	0	0	1	1	1	1	1	0	1	1	0	0	0	0	1
S46_3811121	46	0	0	-	0	1	0	0	0	0	0	1	0	0	1	-	0	0	0	0	1	1	0	1	0	0	1	0	1	0	-	0	0	0	0	0	1	1	1	1	1	0	1	1	0	0	0	0	1
S46_3818833	46	0	0	0	0	0	0	1	0	0	0	0	0	0	1	-	0	0	1	0	1	1	0	1	0	0	1	0	1	0	1	0	0	0	0	0	1	1	1	1	1	0	1	1	0	0	0	0	1
S46_3834006	46	0	0	0	0	1	0	1	0	0	0	0	0	0	1	1	0	0	1	0	1	0	0	1	0	0	1	0	1	0	1	0	0	0	0	0	1	1	1	1	1	0	1	1	0	0	0	0	1
S46_3842081	46	0	0	0	0	1	0	1	0	0	0	0	0	0	1	1	0	0	1	0	1	1	0	1	0	0	1	0	1	0	1	0	0	0	0	0	1	1	1	1	1	0	1	1	0	0	0	0	1
S46_3842893	46	0	0	0	0	1	0	1	0	0	0	0	0	0	1	-	0	0	1	0	1	0	0	1	0	0	1	0	1	0	1	0	0	0	0	0	1	1	1	1	1	0	1	1	0	0	0	0	1
S46_3843034	46	0	0	0	0	1	0	1	0	0	0	0	0	0	1	1	0	0	1	0	1	1	0	1	0	0	1	0	1	0	1	0	0	0	0	0	1	1	1	1	1	0	1	1	0	0	0	0	1
S46_3843232	46	0	0	0	0	1	0	1	0	0	0	0	0	0	1	-	0	0	1	0	1	0	0	0	0	0	1	0	0	0	0	0	0	0	0	0	1	1	1	1	1	0	1	1	0	0	0	0	1
S46_3847968	46	-	0	0	0	1	0	1	0	0	-	0	0	0	1	1	0	0	1	0	1	1	0	0	0	0	1	0	1	0	1	0	0	-	0	0	-	0	1	1	1	0	1	0	0	0	0	0	1
S46_3852692	46	0	0	0	0	1	0	1	0	0	0	0	0	0	1	0	0	0	1	0	1	1	0	1	0	0	1	0	1	0	1	0	0	0	0	0	1	1	1	1	1	0	1	1	0	0	0	0	1
S46_3853466	46	0	0	0	0	0	-	1	0	0	0	0	0	0	1	-	0	0	0	0	1	0	0	1	0	0	1	0	1	0	0	0	0	-	0	0	1	1	1	1	1	0	1	1	0	0	0	0	1
S46_3853581	46	0	0	0	0	1	0	1	0	0	0	0	0	0	0	0	0	0	1	0	1	0	0	1	0	0	1	0	1	-	1	0	0	0	0	0	1	1	1	1	1	0	1	1	0	0	0	0	1
S46_3856740	46	0	0	0	0	1	0	1	0	0	0	0	0	0	1	1	0	0	1	0	1	0	0	1	0	0	1	0	1	0	1	0	0	0	0	0	1	1	1	1	1	0	1	1	0	0	0	0	1
S46_3857492	46	0	0	0	0	1	0	1	0	0	0	0	0	0	1	1	0	0	1	0	1	0	0	1	0	0	1	0	1	0	1	0	0	0	0	0	1	1	1	1	1	0	1	1	0	0	0	0	1
S46_3862196	46	0	0	0	0	1	0	1	0	0	0	0	0	0	1	1	0	0	1	0	1	0	0	1	0	0	1	0	1	0	1	0	0	0	0	0	1	1	1	1	1	0	1	1	0	0	0	0	1
S46_3862619	46	0	0	0	0	0	0	1	0	0	0	0	0	0	1	-	0	0	1	0	1	1	0	1	0	0	1	0	1	0	1	0	0	0	0	0	1	0	1	1	1	0	1	1	0	0	0	0	1
S46_3862771	46	0	0	0	0	1	-	1	0	0	0	0	0	0	1	1	0	0	1	0	1	0	0	1	0	0	1	0	1	0	1	0	0	0	0	0	1	1	1	1	1	0	1	1	0	0	0	0	1
S46_3900527	46	0	0	0	0	1	0	1	0	0	0	0	0	0	1	1	0	0	1	0	1	1	0	1	0	0	1	0	1	0	1	0	0	0	0	0	1	1	1	1	1	0	1	1	0	0	0	0	1
	46 Average	0	0.202703	0.0181818	0	0.625	0	0.945701	0.157658	0	0.201835	0.711712	0.00462963	0.20362	0.527027	0.294444	0.178082	0	0.669683	0.0045045	0.765766	0.481982	0	0.779279	0.045045	0	0.752252	0.545045	0.759091	0.00465116	0.544186	0.189189	0.00900901	0.187215	0	0.333333	0.769231	0.936937	0.386364	0.207207	0.599099	0.00454545	0.765766	0.707207	0.00900901	0.188073	0	0.126126	0.746606
S47_297662	47	-	0	0	0	1	1	0	0	1	0	1	0	0	0	1	0	1	0	1	0	1	0	0	1	0	0	1	1	0	0	0	1	1	1	1	1	1	1	0	1	0	1	1	0	0	0	0	0
S47_376088	47	0	0	0	0	0	-	1	0	1	0	1	0	0	0	1	0	1	0	1	0	1	0	1	1	0	1	1	1	0	0	0	1	1	1	1	1	1	1	0	1	0	1	1	0	0	0	0	0
S47_376797	47	0	0	0	0	1	1	1	0	1	0	1	0	0	0	0	0	1	0	1	0	0	0	1	1	0	1	1	1	0	0	0	1	1	1	1	1	1	0	0	1	0	1	1	0	0	0	0	0
S47_382455	47	0	0	0	0	1	0	1	0	1	0	1	0	0	0	1	0	1	0	1	0	1	0	1	1	0	1	1	1	0	0	0	0	1	1	1	1	1	1	0	1	0	1	1	0	0	0	0	0
S47_411205	47	0	0	0	0	1	1	1	0	1	0	1	0	0	0	1	0	1	0	1	0	0	0	0	1	0	1	1	1	0	0	0	1	0	1	1	1	1	1	0	1	0	1	1	0	0	0	0	0
S47_454226	47	0	0	0	0	1	0	1	0	1	0	1	0	0	0	0	0	1	0	1	0	1	0	1	1	0	1	1	1	0	0	0	1	1	1	1	1	1	1	0	1	0	1	1	0	0	0	0	0
S47_486424	47	0	0	0	0	1	1	1	0	1	0	1	0	0	0	1	0	1	0	1	0	1	0	1	1	0	1	1	1	0	0	0	1	1	1	1	1	1	1	0	1	0	1	1	0	0	0	0	0
S47_532128	47	0	0	0	0	1	1	1	0	1	0	1	0	0	0	1	0	1	0	1	0	1	0	1	1	0	1	1	1	0	0	0	1	1	1	1	1	1	1	0	1	0	1	1	0	0	0	0	0
S47_642543	47	0	0	0	0	1	1	1	0	1	0	1	0	0	0	0	0	1	0	1	0	0	0	1	1	0	0	1	1	0	0	0	1	1	1	1	1	1	0	0	1	0	1	1	0	0	0	0	0
S47_645270	47	0	0	0	0	1	0	1	0	1	0	1	0	0	0	0	0	1	0	1	0	1	0	1	1	0	0	1	1	0	0	0	1	1	1	1	1	1	1	0	1	0	1	1	0	0	0	0	0
S47_645412	47	0	0	0	0	1	1	1	0	1	0	1	0	0	0	1	0	1	0	1	0	1	0	1	1	0	0	1	1	0	0	0	1	1	1	1	1	1	1	0	1	0	1	1	0	0	0	0	0
S47_670280	47	0	0	0	0	0	1	1	0	1	0	1	0	0	0	0	0	1	0	1	0	1	0	1	1	0	0	1	1	0	0	0	1	1	1	0	1	1	0	0	1	0	1	1	0	0	0	0	0
S47_671201	47	-	0	0	0	-	-	1	0	1	0	1	0	0	-	1	0	1	0	1	0	0	0	1	1	0	0	1	0	0	0	0	1	1	1	1	1	1	1	0	1	0	1	1	0	0	0	0	0
S47_704976	47	0	0	0	0	0	0	1	0	1	0	1	0	0	0	-	0	1	0	1	0	1	0	1	1	0	0	1	1	0	-	0	0	1	0	1	1	1	1	0	1	0	1	1	0	0	0	0	0
S47_762060	47	0	0	0	0	1	1	1	0	1	0	1	0	0	0	1	0	1	0	1	0	1	0	1	1	0	0	1	1	0	0	0	1	1	1	1	1	1	1	0	1	0	1	1	0	0	0	0	0
S47_779784	47	0	0	0	0	0	0	1	0	1	0	1	0	0	0	1	0	1	0	1	0	1	0	1	1	0	0	1	1	0	0	0	1	1	1	1	1	1	1	0	1	0	1	1	0	0	0	0	0
S47_810543	47	0	0	0	0	1	1	1	0	1	0	1	0	0	0	1	0	1	0	1	0	1	0	1	1	0	0	1	1	0	0	0	1	1	1	1	1	1	1	0	1	0	1	1	0	0	0	0	0
S47_827280	47	0	0	0	0	1	1	1	0	1	0	1	0	0	0	1	0	1	0	1	0	1	0	1	1	0	0	1	1	0	0	0	1	1	1	1	1	1	1	0	1	0	1	1	0	0	0	0	0
S47_862998	47	0	0	0	0	1	1	1	0	1	0	1	0	0	0	1	0	1	0	1	0	0	0	1	1	0	0	1	1	0	0	0	1	1	1	1	1	1	1	0	1	0	1	1	0	0	0	0	0
S47_869586	47	0	0	0	0	0	1	1	0	1	0	1	0	0	0	1	0	1	0	0	0	0	0	1	1	0	0	1	1	0	0	0	1	1	1	1	1	1	0	0	1	0	1	1	0	0	0	0	0
S47_881239	47	0	0	0	0	0	0	1	0	1	0	1	0	0	0	1	0	1	0	1	0	0	0	1	1	0	0	1	1	0	0	0	1	1	0	1	1	1	1	0	1	0	1	1	0	0	0	0	0
S47_910296	47	0	0	0	0	1	-	1	0	0	0	1	0	0	0	-	0	1	0	1	0	1	0	1	1	0	0	1	1	0	0	0	1	1	1	1	1	1	1	0	1	0	1	1	0	0	0	0	0
S47_910716	47	0	0	0	0	1	1	1	0	1	0	1	0	0	0	1	0	1	0	1	0	1	0	1	1	0	0	1	1	0	0	0	1	1	1	1	1	1	1	0	1	0	1	1	0	0	0	0	0
S47_1017262	47	1	1	0	1	-	-	0	0	0	1	0	1	0	1	-	1	0	1	1	1	1	1	1	1	1	1	1	-	1	1	1	0	0	1	1	1	0	0	1	0	1	0	1	1	0	1	1	0
S47_1050058	47	0	0	0	0	1	1	1	0	1	0	1	0	0	0	1	0	1	0	1	0	1	0	1	1	0	0	1	1	0	0	0	1	1	1	1	1	1	1	0	1	0	1	1	0	0	0	0	0
S47_1050865	47	0	0	0	0	1	1	1	0	1	0	1	0	0	0	1	0	1	0	1	0	1	0	1	1	0	0	1	1	0	0	0	1	1	1	1	1	1	1	0	1	0	1	1	0	0	0	0	0
S47_1062526	47	0	0	0	0	0	1	1	0	1	0	1	0	0	0	0	0	1	0	0	0	1	0	1	1	0	0	1	1	0	0	0	1	1	1	1	1	1	1	0	1	0	1	1	0	0	0	0	0
S47_1135729	47	0	0	0	0	1	1	1	0	1	0	1	0	0	0	1	0	1	0	1	0	1	0	1	1	0	0	1	1	0	0	0	1	1	1	1	1	1	1	0	1	0	1	1	0	0	0	0	0
S47_1277339	47	0	0	0	0	0	1	1	0	1	0	1	0	0	0	1	0	1	0	1	0	0	0	1	1	0	0	1	1	0	0	0	1	1	1	1	1	1	1	0	1	0	1	1	0	0	0	0	0
S47_1392569	47	0	0	0	0	1	0	1	0	1	0	1	0	0	0	1	0	1	0	0	0	1	0	1	1	0	0	1	1	0	0	0	1	1	1	1	1	1	1	0	1	0	1	1	0	0	0	0	0
S47_1583876	47	0	0	0	0	1	0	1	0	1	0	1	0	0	0	1	0	1	0	1	0	1	0	1	1	0	0	1	1	0	0	0	1	1	1	1	1	1	1	0	1	0	1	1	0	0	0	0	0
S47_1717141	47	0	0	0	0	1	1	1	0	1	0	1	0	0	0	0	0	1	0	1	0	1	0	1	1	0	0	1	1	0	0	0	1	1	1	1	1	1	1	0	1	0	1	1	0	0	0	0	0
S47_1732927	47	0	0	0	0	0	0	1	0	1	0	1	0	0	0	0	0	1	0	1	0	1	0	1	1	0	0	1	1	0	0	0	1	1	1	1	1	1	1	0	1	0	1	1	0	0	0	0	0
S47_1845885	47	1	1	-	1	-	-	0	1	0	-	0	-	1	-	-	-	0	-	1	1	1	1	1	0	1	1	0	0	0	0	1	1	0	0	0	0	0	0	1	0	-	1	1	1	-	1	0	1
	47 Average	0.0625	0.0588235	0	0.0588235	0.709677	0.689655	0.911765	0.0294118	0.911765	0.030303	0.941176	0.030303	0.0294118	0.03125	0.733333	0.030303	0.941176	0.030303	0.911765	0.0588235	0.764706	0.0588235	0.941176	0.970588	0.0588235	0.264706	0.970588	0.939394	0.0294118	0.030303	0.0588235	0.911765	0.911765	0.911765	0.941176	0.970588	0.941176	0.823529	0.0588235	0.941176	0.030303	0.970588	1	0.0588235	0	0.0588235	0.0294118	0.0294118
S48_7507	48	0	0	0	0	0	1	1	0	0	0	1	0	0	0	-	0	1	0	1	0	1	0	1	0	0	0	1	1	1	0	0	1	1	1	1	0	1	0	0	1	1	1	0	0	0	0	0	1
S48_16468	48	0	0	0	0	1	1	1	0	1	0	1	0	0	0	1	0	1	1	1	0	1	0	1	1	0	0	1	1	-	0	1	1	1	1	1	0	1	0	0	1	1	1	0	0	-	0	0	1
S48_60100	48	0	0	0	0	1	0	1	0	1	0	1	0	0	0	0	0	1	0	0	0	1	0	1	1	0	0	1	1	1	0	1	1	1	0	1	0	1	0	0	1	0	1	0	0	0	0	0	1
S48_69202	48	0	0	0	0	1	1	1	0	1	0	1	0	0	0	1	0	1	1	0	0	1	0	1	1	0	0	1	0	0	0	1	1	1	1	1	0	1	0	0	1	1	1	0	0	0	0	0	1
S48_77919	48	0	0	0	0	0	1	1	0	1	0	1	0	0	0	0	0	1	1	1	0	0	0	1	0	0	0	0	1	1	0	1	1	1	1	1	0	1	0	0	1	1	1	0	0	0	0	0	1
S48_78090	48	0	0	0	0	0	0	1	0	1	0	1	0	0	0	0	0	0	1	1	0	1	0	1	1	0	0	0	1	1	0	1	1	1	0	0	0	1	0	0	1	0	1	0	0	-	0	0	1
S48_128319	48	0	0	0	0	1	1	1	0	1	-	1	0	0	0	-	0	1	1	1	0	1	0	1	1	0	0	1	1	1	0	1	1	0	1	1	0	1	0	0	1	1	1	0	0	0	0	0	1
S48_159687	48	0	0	0	0	-	1	1	0	1	0	0	0	0	0	1	0	1	1	1	0	1	0	1	1	0	0	1	1	0	0	1	1	0	1	1	1	1	0	0	1	1	1	0	0	0	0	0	0
S48_191921	48	0	0	0	0	1	1	1	0	1	0	1	0	0	0	1	0	1	1	1	0	1	0	1	1	0	0	1	1	1	0	1	1	1	1	1	1	1	0	0	1	1	1	0	0	0	0	0	0
S48_246017	48	0	0	0	0	1	-	1	0	1	0	1	0	0	0	0	0	1	1	1	0	1	0	1	1	0	0	1	1	1	0	1	1	1	1	1	1	1	0	0	1	0	0	0	0	0	0	0	0
S48_247293	48	0	0	0	0	1	1	1	0	1	0	1	0	0	0	0	0	1	1	1	0	1	0	1	1	0	0	1	1	1	0	1	1	1	1	1	1	1	0	0	1	1	1	0	0	0	0	0	0
S48_248041	48	0	0	0	0	1	0	0	0	1	0	1	0	0	0	1	0	1	0	1	0	1	0	1	1	0	0	0	1	0	0	1	1	1	1	1	1	1	0	0	1	1	1	0	0	0	0	0	0
S48_263803	48	0	0	0	0	1	1	1	0	1	0	1	0	0	0	1	0	1	1	1	0	1	0	1	1	0	0	1	1	1	0	1	1	1	1	1	1	1	0	0	1	1	1	0	0	0	0	0	0
S48_275625	48	0	0	1	0	1	0	1	0	1	0	1	0	0	0	1	0	1	1	1	0	0	0	1	1	0	0	1	1	1	0	1	1	1	1	1	1	1	0	0	1	1	1	0	0	0	1	0	0
S48_280745	48	0	0	0	0	1	1	1	0	1	0	1	0	0	0	1	0	1	1	1	0	1	0	1	1	0	0	1	1	1	0	1	1	1	1	1	1	1	0	0	1	1	1	0	0	0	0	0	0
S48_290375	48	0	0	0	0	0	1	1	0	1	0	1	0	0	0	0	0	1	1	1	0	1	0	1	1	0	0	1	1	1	0	1	1	1	1	1	1	1	0	0	1	1	1	0	0	0	0	0	0
S48_293768	48	0	0	0	0	1	-	1	0	0	0	1	0	0	0	-	0	1	0	0	0	1	0	1	1	0	0	0	1	-	0	1	1	1	0	1	1	1	0	0	1	1	1	0	0	0	0	0	0
S48_294213	48	0	0	0	0	1	1	1	0	1	0	1	0	0	0	1	0	1	1	1	0	1	0	1	1	0	0	1	1	1	0	1	1	1	1	1	1	1	0	0	1	1	1	0	0	0	0	0	0
S48_350264	48	0	0	0	0	0	1	1	0	1	0	1	0	0	0	0	0	1	1	1	0	1	0	1	1	0	0	1	1	1	0	1	1	0	1	1	1	1	0	0	1	1	1	0	0	0	0	0	0
S48_350576	48	0	0	0	0	1	1	1	0	1	0	1	0	0	0	1	0	1	1	1	0	1	0	1	1	0	0	1	1	1	0	1	1	1	1	1	1	1	0	0	1	1	1	0	0	0	1	0	0
S48_350792	48	-	0	0	0	0	0	1	0	0	0	1	0	0	0	0	0	1	1	1	0	1	0	1	0	0	0	1	1	1	0	1	1	1	1	1	0	1	0	0	1	1	1	0	0	0	0	0	0
S48_352238	48	0	0	0	0	0	-	1	0	1	0	1	0	0	0	0	0	1	1	1	0	1	0	1	1	0	0	1	1	0	0	1	1	1	0	0	1	0	0	0	1	1	1	0	0	0	0	0	0
S48_366481	48	0	0	0	0	-	1	1	0	0	0	1	0	0	0	1	0	1	1	1	0	1	0	1	1	0	0	1	1	1	0	1	1	1	1	1	1	1	0	0	1	1	1	0	0	0	0	0	0
S48_371503	48	0	0	0	0	1	0	1	0	1	0	1	0	0	0	0	0	1	1	1	0	1	0	1	1	0	0	1	1	1	0	1	1	1	1	1	1	1	0	0	1	1	1	0	0	0	0	0	0
S48_375794	48	0	0	0	0	1	1	1	0	1	0	1	0	0	0	-	0	1	0	1	0	1	0	1	1	0	0	1	1	1	-	1	1	1	0	1	1	1	0	0	1	0	1	0	0	0	0	0	0
S48_399132	48	0	0	0	0	0	0	1	0	1	0	1	0	0	0	1	0	1	1	1	0	1	0	1	1	0	0	1	1	0	0	0	0	1	0	1	1	1	0	0	1	0	1	0	0	0	0	0	0
S48_434511	48	1	1	1	1	1	0	0	0	-	1	1	0	1	1	-	0	1	-	0	1	0	1	1	-	1	0	0	1	-	1	1	1	1	0	0	1	0	1	1	1	-	1	0	1	0	0	0	0
S48_452400	48	0	0	0	0	1	1	1	0	1	0	1	0	0	0	0	0	1	1	1	0	0	0	1	1	0	0	0	1	1	0	1	1	1	1	1	1	1	0	0	1	0	1	0	0	0	0	0	0
S48_466809	48	0	0	0	0	1	1	1	0	1	0	1	0	0	0	0	0	1	-	1	0	1	0	1	0	0	0	1	0	1	0	1	1	1	-	1	1	1	0	0	1	1	1	0	0	0	0	-	0
S48_475771	48	0	0	0	0	1	1	1	0	1	0	1	0	0	0	0	0	1	1	1	0	0	0	1	1	0	0	1	1	0	0	1	1	1	1	1	1	1	0	0	1	1	1	0	0	0	0	0	0
S48_1204570	48	0	0	0	0	0	1	0	0	1	0	1	-	0	0	1	0	1	0	1	0	1	0	1	1	0	0	1	1	0	0	1	0	0	1	1	1	1	0	0	1	-	1	0	0	0	0	0	0
S48_1206042	48	0	0	0	0	-	0	1	0	1	0	1	0	0	0	-	0	1	1	1	0	-	0	1	1	0	0	1	0	0	0	0	1	1	1	1	0	1	-	0	1	1	1	0	0	-	0	0	0
S48_1260042	48	0	0	0	0	1	0	1	0	1	0	1	0	0	0	1	0	1	1	1	0	1	0	0	1	0	0	1	1	1	0	1	1	0	1	1	0	1	1	0	1	1	1	0	0	0	0	0	0
S48_1293760	48	0	0	0	0	1	1	1	0	1	0	1	0	0	0	1	0	1	1	1	0	1	0	1	1	0	0	1	1	1	0	1	1	1	1	1	1	1	1	0	1	1	1	0	0	0	0	0	0
S48_1293886	48	0	0	0	0	1	1	1	0	1	0	1	0	0	0	1	0	1	1	1	0	1	0	1	1	0	0	1	1	1	0	1	1	1	1	1	1	1	1	0	1	1	1	0	0	0	1	0	0
S48_1344406	48	1	1	1	1	0	-	1	1	0	-	1	1	1	1	0	0	1	1	1	0	1	1	1	1	1	0	0	0	-	1	0	0	0	1	1	1	1	1	1	1	1	1	1	1	0	1	0	1
S48_1458456	48	0	0	0	1	1	0	1	0	1	0	1	0	1	1	-	0	1	1	0	1	1	0	1	0	1	0	0	1	1	0	1	1	-	1	1	1	1	0	0	1	1	1	0	0	0	1	1	0
S48_1520786	48	0	0	0	0	1	1	1	0	1	0	1	0	0	0	0	0	1	1	1	0	1	0	1	1	0	0	1	1	1	0	1	1	1	1	1	1	1	1	0	1	1	1	0	0	0	0	0	0
S48_1584401	48	0	0	0	0	-	1	1	0	1	0	1	0	0	0	-	0	1	1	1	0	0	0	1	1	0	0	1	1	0	0	1	1	1	0	1	1	1	0	0	1	0	1	0	0	0	0	0	0
S48_1614703	48	0	0	0	0	1	0	1	0	1	0	1	0	0	0	1	0	1	1	1	0	1	0	1	1	0	0	1	1	1	0	1	1	1	1	1	1	1	1	0	1	1	1	0	0	0	1	0	0
S48_1643914	48	0	0	0	0	0	1	1	0	1	0	1	0	0	0	0	0	1	1	1	0	1	0	1	1	0	0	1	1	1	0	1	1	1	1	1	1	1	1	0	1	1	1	0	0	0	0	0	0
S48_1650662	48	0	0	0	0	1	1	1	0	1	0	1	0	0	0	1	0	1	1	1	0	1	0	1	1	0	0	1	1	0	0	1	1	1	1	1	1	1	1	0	1	1	1	0	0	0	0	0	0
	48 Average	0.0487805	0.047619	0.0714286	0.0714286	0.710526	0.684211	0.928571	0.0238095	0.878049	0.025	0.97619	0.0243902	0.0714286	0.0714286	0.529412	0	0.97619	0.85	0.880952	0.047619	0.853659	0.047619	0.97619	0.878049	0.0714286	0	0.809524	0.904762	0.736842	0.0487805	0.904762	0.928571	0.853659	0.804878	0.928571	0.761905	0.952381	0.219512	0.047619	1	0.825	0.97619	0.0238095	0.047619	0	0.142857	0.0243902	0.190476
S49_3351	49	0	1	0	0	0	0	1	0	0	1	0	1	1	1	1	0	0	1	0	1	1	0	0	0	0	0	0	0	1	1	0	0	0	0	0	0	1	0	0	0	0	0	1	0	0	0	0	0
S49_256288	49	0	1	0	0	-	1	1	1	0	0	0	0	1	1	0	0	0	0	1	0	0	0	0	0	0	0	1	0	0	1	1	0	1	0	0	0	1	1	0	0	0	0	0	0	0	0	0	0
S49_301260	49	0	1	0	0	0	0	1	1	0	0	0	0	1	1	0	0	0	0	1	0	1	0	0	0	0	0	1	0	1	0	0	0	1	0	0	0	1	1	0	0	0	0	0	0	1	0	0	0
S49_339946	49	0	1	0	0	1	1	1	0	0	0	0	0	1	1	1	1	0	0	1	0	1	0	0	0	0	0	1	0	0	1	1	0	0	0	0	0	1	1	0	0	0	0	0	0	1	0	0	0
S49_411367	49	0	1	0	0	1	1	1	1	0	0	0	0	1	1	0	1	0	0	1	0	1	0	0	0	0	0	0	0	0	1	1	0	0	0	0	0	1	1	0	0	0	0	0	0	1	0	0	0
	49 Average	0	1	0	0	0.5	0.6	1	0.6	0	0.2	0	0.2	1	1	0.4	0.4	0	0.2	0.8	0.2	0.8	0	0	0	0	0	0.6	0	0.4	0.8	0.6	0	0.4	0	0	0	1	0.8	0	0	0	0	0.2	0	0.6	0	0	0
S50_146244	50	-	1	0	1	0	-	1	0	0	1	1	0	1	1	0	0	0	-	1	0	0	0	1	1	0	1	0	1	0	1	0	0	0	0	0	1	0	0	0	0	0	0	1	0	-	1	0	1
S50_390947	50	0	1	0	1	0	1	1	0	0	1	1	0	1	1	0	0	0	1	1	0	1	0	1	1	0	1	0	1	1	1	0	0	0	0	0	1	0	0	0	1	0	0	1	0	0	1	0	1
	50 Average	0	1	0	1	0	1	1	0	0	1	1	0	1	1	0	0	0	1	1	0	0.5	0	1	1	0	1	0	1	0.5	1	0	0	0	0	0	1	0	0	0	0.5	0	0	1	0	0	1	0	1
S51_189710	51	0	1	0	0	0	1	1	0	0	0	0	0	1	1	1	1	0	0	1	0	1	0	0	0	0	0	1	0	1	1	1	0	1	0	0	0	1	1	0	0	0	0	0	0	1	0	0	0
S51_191061	51	0	1	0	0	0	1	0	0	0	0	0	0	1	1	0	1	0	0	1	0	1	0	0	0	0	0	1	0	1	1	1	0	1	0	0	0	1	1	0	0	0	0	0	0	1	0	0	0
	51 Average	0	1	0	0	0	1	0.5	0	0	0	0	0	1	1	0.5	1	0	0	1	0	1	0	0	0	0	0	1	0	1	1	1	0	1	0	0	0	1	1	0	0	0	0	0	0	1	0	0	0
S53_120500	53	1	1	1	1	0	1	1	1	1	0	0	0	1	0	-	0	0	0	0	1	1	1	1	1	1	0	1	1	1	1	0	1	0	0	0	1	1	1	1	1	1	1	1	0	1	1	0	1
S53_121639	53	0	1	0	1	0	1	1	1	0	0	1	1	1	0	-	0	0	1	0	1	1	1	1	1	1	1	0	1	1	0	1	1	1	1	1	1	0	0	1	1	1	1	1	1	0	0	-	1
S53_124118	53	1	1	1	1	0	0	1	0	1	0	1	1	1	1	0	0	1	1	0	1	1	1	1	1	1	0	1	0	1	0	1	0	0	0	1	0	1	1	1	1	1	0	1	1	0	1	1	1
S53_124556	53	0	1	1	1	0	1	1	1	1	0	0	0	0	1	0	0	0	0	1	1	1	1	0	1	1	-	1	0	1	1	1	0	1	1	1	1	0	0	1	1	-	1	1	1	1	0	1	1
S53_126217	53	0	1	1	1	0	0	-	1	0	1	1	1	1	-	-	1	1	1	1	1	0	1	1	1	1	1	1	0	1	0	1	1	1	0	0	0	1	0	1	1	0	1	1	1	1	0	1	1
S53_156863	53	0	0	0	0	1	-	1	0	1	1	1	0	0	1	1	0	1	0	1	0	0	0	1	1	0	1	1	1	0	0	0	1	1	1	1	1	1	1	0	1	0	0	1	1	0	0	0	0
S53_351406	53	0	0	0	0	1	-	1	0	1	1	1	0	0	1	-	0	1	0	1	0	0	0	1	1	0	1	1	1	0	0	0	0	1	0	1	1	1	1	0	1	0	1	0	1	0	0	0	0
S53_398677	53	0	0	0	0	0	0	1	0	1	1	1	0	0	1	0	0	1	0	1	0	0	0	1	1	0	1	1	1	0	0	0	1	1	1	1	1	1	1	0	1	0	1	1	1	0	0	0	0
	53 Average	0.25	0.625	0.5	0.625	0.25	0.5	1	0.5	0.75	0.5	0.75	0.375	0.5	0.714286	0.25	0.125	0.625	0.375	0.625	0.625	0.5	0.625	0.875	1	0.625	0.714286	0.875	0.625	0.625	0.25	0.5	0.625	0.75	0.5	0.75	0.75	0.75	0.625	0.625	1	0.428571	0.75	0.875	0.875	0.375	0.25	0.428571	0.625
S54_131336	54	0	1	0	1	0	0	0	1	0	1	0	0	1	1	1	0	0	1	1	0	1	1	0	1	1	0	1	0	1	1	0	0	1	1	1	0	1	1	0	1	0	0	1	0	1	0	0	1
	54 Average	0	1	0	1	0	0	0	1	0	1	0	0	1	1	1	0	0	1	1	0	1	1	0	1	1	0	1	0	1	1	0	0	1	1	1	0	1	1	0	1	0	0	1	0	1	0	0	1
S55_47646	55	0	1	0	0	0	0	1	1	0	1	1	1	1	1	1	0	0	1	1	1	1	0	0	1	0	0	0	0	1	1	0	1	0	1	1	0	1	0	0	0	0	0	1	1	0	0	0	0
S55_345547	55	0	1	0	0	0	0	1	0	0	1	0	1	1	1	1	0	0	1	1	1	1	0	0	0	0	0	0	0	1	1	0	0	0	1	0	0	1	0	0	0	0	0	1	1	0	0	0	0
S55_428605	55	0	1	0	0	0	0	0	1	0	1	1	1	0	1	-	0	0	1	0	1	1	0	0	1	0	0	0	0	-	0	0	0	0	1	1	0	1	0	0	0	0	0	1	1	0	0	0	0
S55_569616	55	0	1	0	0	0	0	1	1	0	1	1	0	1	1	0	0	0	1	1	1	1	0	0	1	0	0	0	0	1	1	0	1	0	1	1	0	1	0	0	0	0	0	1	1	0	0	-	0
S55_575707	55	0	1	0	0	0	-	1	1	0	1	1	1	1	1	-	0	0	1	1	1	1	0	0	1	0	0	0	0	0	1	0	0	0	0	1	0	1	0	0	0	0	0	1	1	0	0	0	0
S55_632773	55	0	1	1	0	0	0	0	1	0	1	1	1	1	1	0	0	0	0	1	1	1	0	0	1	0	0	0	0	0	1	1	1	0	0	0	0	1	0	0	0	0	0	1	1	0	0	0	0
S55_632890	55	0	1	0	0	0	0	1	1	0	1	1	1	1	1	-	0	0	0	1	1	0	0	0	0	0	0	0	0	0	1	1	1	0	1	1	0	1	-	0	0	0	0	1	1	0	0	0	0
S55_652393	55	0	1	0	0	0	0	1	1	0	1	1	1	1	1	0	0	0	1	1	1	0	0	0	1	0	0	0	0	1	1	1	1	0	1	1	0	1	0	0	0	0	0	1	1	0	0	0	0
S55_936214	55	-	1	-	-	-	-	1	0	-	0	0	0	1	1	-	-	-	1	1	1	1	-	-	0	-	0	-	-	1	1	1	0	-	1	0	-	1	-	-	-	-	-	1	1	-	-	-	-
	55 Average	0	1	0.125	0	0	0	0.777778	0.777778	0	0.888889	0.777778	0.777778	0.888889	1	0.4	0	0	0.777778	0.888889	1	0.777778	0	0	0.666667	0	0	0	0	0.625	0.888889	0.444444	0.555556	0	0.777778	0.666667	0	1	0	0	0	0	0	1	1	0	0	0	0
S57_23509	57	1	1	1	0	-	-	1	1	0	-	0	0	0	0	-	0	0	0	0	0	-	1	0	-	1	1	0	-	-	-	1	1	0	-	-	1	1	0	0	1	0	1	1	1	-	0	0	0
S57_27868	57	0	1	0	0	0	0	1	1	0	1	1	1	1	1	-	0	0	1	1	1	1	0	0	1	0	0	0	0	-	1	0	1	0	1	1	0	1	0	0	0	0	0	1	1	0	0	0	0
S57_42796	57	0	1	0	0	0	0	1	1	0	1	1	1	1	0	0	0	0	0	1	1	1	0	0	1	0	0	0	0	-	0	0	0	0	1	1	0	1	0	0	0	0	0	1	1	-	0	0	0
S57_60026	57	0	1	0	0	0	0	1	1	0	1	1	1	1	1	1	0	0	1	1	1	1	0	0	1	0	0	0	0	0	1	0	1	0	1	1	0	1	0	0	0	0	0	1	1	0	0	0	0
S57_120250	57	0	1	0	0	0	0	0	0	0	0	1	1	1	1	1	0	0	1	0	1	-	0	0	1	0	0	0	0	-	1	0	1	0	1	1	0	1	0	0	0	0	0	1	1	0	0	0	0
S57_129027	57	0	1	0	0	0	0	1	1	0	1	1	1	1	1	0	0	0	1	1	1	1	0	0	1	0	0	0	0	1	1	0	0	0	1	1	0	1	0	0	0	0	0	1	1	0	0	0	0
S57_142788	57	0	1	0	0	0	0	1	1	0	1	1	1	1	1	0	0	0	1	1	1	1	0	0	1	0	0	0	0	1	1	0	1	0	1	1	0	1	0	0	0	0	0	1	1	0	0	0	0
S57_344353	57	0	1	0	0	-	-	1	0	0	1	1	0	1	1	-	0	0	1	1	1	1	0	0	1	0	0	0	0	0	0	0	1	0	1	1	0	1	0	0	0	-	0	1	1	-	-	0	0
S57_344483	57	0	1	0	0	0	0	1	1	0	1	1	1	1	1	-	0	0	1	1	1	1	0	0	1	0	0	0	0	1	1	0	1	0	1	1	0	1	0	0	0	0	0	1	1	0	0	0	0
S57_409669	57	0	1	0	0	-	0	1	1	0	0	1	1	1	1	0	0	0	0	1	1	1	0	0	1	0	0	0	0	1	0	0	1	0	1	1	0	1	0	0	0	0	0	1	0	0	0	0	0
	57 Average	0.1	1	0.1	0	0	0	0.9	0.8	0	0.777778	0.9	0.8	0.9	0.8	0.333333	0	0	0.7	0.8	0.9	1	0.1	0	1	0.1	0.1	0	0	0.666667	0.666667	0.1	0.8	0	1	1	0.1	1	0	0	0.1	0	0.1	1	0.9	0	0	0	0
S60_252131	60	1	0	0	1	1	0	1	1	1	0	1	0	1	0	1	0	0	1	0	0	1	0	1	1	0	1	1	1	0	1	0	0	1	0	1	0	1	1	1	1	0	0	0	0	0	0	0	0
	60 Average	1	0	0	1	1	0	1	1	1	0	1	0	1	0	1	0	0	1	0	0	1	0	1	1	0	1	1	1	0	1	0	0	1	0	1	0	1	1	1	1	0	0	0	0	0	0	0	0
S61_192892	61	1	0	0	1	0	0	1	0	1	0	1	0	1	0	0	0	0	-	1	1	1	1	0	0	1	1	0	0	0	0	1	-	1	1	0	0	1	0	1	1	1	0	0	1	1	0	1	1
	61 Average	1	0	0	1	0	0	1	0	1	0	1	0	1	0	0	0	0	#DIV/0!	1	1	1	1	0	0	1	1	0	0	0	0	1	#DIV/0!	1	1	0	0	1	0	1	1	1	0	0	1	1	0	1	1
S63_142229	63	0	0	0	0	0	0	1	0	0	1	1	0	0	1	0	0	1	0	1	0	0	0	1	1	0	1	1	1	0	0	0	1	1	1	1	1	1	1	0	1	0	0	1	1	0	0	0	0
S63_253761	63	0	0	0	0	0	-	1	0	1	0	1	0	0	1	0	0	1	0	1	0	1	0	1	0	0	1	1	1	0	0	0	1	1	1	1	1	1	1	0	1	0	0	1	1	0	0	0	0
S63_253881	63	0	0	0	0	0	0	0	0	0	1	1	0	0	1	0	0	1	0	1	0	0	0	1	1	0	1	1	1	0	0	0	1	1	1	1	1	1	0	0	1	0	0	1	1	0	0	0	0
S63_263788	63	0	0	0	0	1	0	1	0	1	1	1	0	0	1	0	0	1	0	1	0	1	0	1	1	0	1	1	1	0	0	0	1	1	1	1	1	1	1	0	1	0	0	1	1	0	0	0	0
S63_271195	63	0	0	0	0	-	-	1	0	1	1	0	0	0	1	0	0	1	0	1	0	1	0	1	1	0	1	1	1	0	0	0	1	1	0	0	1	1	1	0	0	0	0	1	1	0	0	0	0
S63_380742	63	0	0	0	0	1	0	1	0	1	1	1	0	0	1	1	0	1	0	0	0	1	0	1	1	0	1	1	1	0	0	0	1	0	1	1	1	1	1	0	1	0	0	1	1	0	0	0	0
S63_387291	63	0	0	0	0	0	0	1	0	1	1	1	0	0	1	1	0	1	0	0	0	1	0	1	1	0	1	1	1	0	0	0	1	0	1	1	1	1	1	0	1	0	0	1	1	0	0	0	0
S63_400725	63	0	0	0	0	1	0	1	0	1	0	1	0	0	1	1	0	1	0	0	0	0	0	1	1	0	1	1	1	0	0	0	1	0	1	1	0	0	1	0	1	0	0	1	1	0	0	0	0
S63_455015	63	0	0	0	0	1	0	1	0	1	0	1	0	0	1	1	0	1	0	0	0	1	0	1	1	0	0	1	1	0	0	0	1	0	1	1	1	1	1	0	1	0	0	1	1	0	0	0	0
S63_468364	63	0	0	0	0	1	0	1	0	1	1	1	0	0	1	1	0	1	0	0	0	0	0	1	1	0	1	1	1	0	0	0	0	0	1	1	1	1	1	0	1	0	0	1	1	0	0	0	0
S63_562051	63	0	0	0	0	1	0	1	0	1	0	1	0	0	1	-	0	1	0	0	0	0	0	1	1	0	1	1	1	0	0	0	1	0	1	1	1	1	1	0	1	0	0	1	1	0	0	0	0
S63_573839	63	0	0	0	0	1	0	1	0	1	1	1	0	0	1	1	0	1	0	0	0	0	0	1	1	0	1	1	1	0	0	0	1	0	1	1	1	1	1	0	1	0	0	1	1	0	0	0	0
	63 Average	0	0	0	0	0.636364	0	0.916667	0	0.833333	0.666667	0.916667	0	0	1	0.545455	0	1	0	0.416667	0	0.5	0	1	0.916667	0	0.916667	1	1	0	0	0	0.916667	0.416667	0.916667	0.916667	0.916667	0.916667	0.916667	0	0.916667	0	0	1	1	0	0	0	0
S67_3003	67	-	1	0	1	0	0	0	1	0	0	0	0	0	1	-	0	0	1	0	0	1	1	1	1	1	0	0	0	0	1	0	-	0	1	0	0	1	1	0	1	0	0	0	1	0	0	0	1
S67_32708	67	0	1	0	1	-	0	0	1	0	1	0	0	0	1	0	0	0	1	0	0	1	1	1	1	1	1	0	0	1	1	0	0	1	1	0	0	1	1	0	1	0	0	1	1	0	0	0	1
S67_35122	67	-	1	0	1	0	0	0	1	0	1	0	0	0	1	-	0	0	0	0	0	1	1	0	1	1	1	0	0	0	1	0	0	1	1	0	0	1	1	0	1	0	0	1	1	0	0	0	1
S67_56644	67	0	1	0	0	0	0	0	0	0	1	0	0	0	0	0	0	0	0	0	0	0	1	1	1	1	1	0	0	1	1	0	0	0	1	0	0	1	1	0	1	0	0	1	0	0	0	0	1
S67_63317	67	0	1	0	1	0	0	0	1	0	1	0	0	0	1	1	0	0	1	0	0	1	1	1	1	1	1	0	0	0	1	0	0	1	1	0	0	1	1	0	1	0	0	1	1	0	0	0	1
S67_66895	67	0	1	0	1	0	0	0	1	0	1	0	0	0	1	0	0	0	1	0	0	1	1	1	1	1	1	0	0	1	1	0	0	1	1	0	0	1	1	0	0	0	0	1	1	0	0	0	1
S67_111168	67	0	1	0	1	0	-	0	1	0	1	0	0	0	1	-	0	0	1	0	0	1	1	1	1	0	1	0	0	0	0	0	0	1	1	0	0	1	1	0	1	0	0	1	1	0	0	0	1
S67_111321	67	0	1	0	1	0	0	0	1	0	1	0	0	0	1	1	0	0	1	0	0	1	1	1	1	1	1	0	0	1	1	0	0	1	1	0	0	1	1	0	1	0	0	1	1	0	0	0	1
S67_121762	67	0	1	0	1	0	0	0	1	0	0	0	0	0	1	0	0	0	0	0	0	0	1	0	1	1	0	0	0	1	0	0	0	0	0	0	0	1	1	0	1	0	0	1	1	0	0	0	0
S67_141977	67	0	1	0	1	0	0	0	1	0	0	0	0	0	1	-	0	0	0	0	0	0	1	1	1	1	1	0	0	1	1	0	0	1	0	0	0	1	0	0	1	0	0	1	1	0	0	0	1
S67_207986	67	0	0	0	1	0	0	0	0	0	1	0	0	0	1	1	0	0	1	0	0	1	0	1	1	1	1	0	0	0	0	0	0	1	0	0	0	1	0	0	0	0	0	1	1	0	0	0	1
S67_225350	67	0	1	0	1	0	0	0	1	0	1	0	0	0	0	-	-	0	0	0	0	1	1	1	1	1	1	0	0	1	0	0	0	1	-	0	0	1	1	0	1	0	0	1	0	0	0	0	0
S67_233583	67	-	1	0	1	0	-	0	1	0	1	0	0	0	1	0	0	0	0	0	0	1	1	1	1	0	1	0	0	-	1	0	0	1	0	0	0	1	1	0	1	0	0	1	1	0	0	0	0
S67_241361	67	0	1	0	0	0	0	0	1	0	1	0	0	0	1	0	0	0	0	0	0	1	1	0	1	0	1	0	0	1	1	0	0	1	1	0	0	1	0	0	1	0	0	1	1	0	0	0	1
S67_335272	67	0	1	0	1	0	0	0	1	0	1	0	0	0	1	-	0	0	1	0	0	1	1	1	1	1	1	0	0	0	1	0	0	1	1	0	0	1	1	0	0	0	0	0	1	0	0	0	1
S67_337538	67	0	1	0	1	-	-	0	1	0	0	0	0	0	1	-	0	0	0	0	0	1	1	1	1	1	0	0	0	-	1	0	0	1	-	0	0	1	1	0	0	0	0	1	1	0	0	0	1
S67_362182	67	0	1	0	1	0	-	0	1	0	1	0	0	0	1	0	0	0	1	0	0	0	1	1	0	1	1	0	0	1	1	0	0	1	1	0	0	1	1	0	1	0	0	0	1	0	0	0	1
S67_394875	67	-	1	0	1	-	0	0	1	0	1	0	-	0	1	-	0	0	0	0	0	1	1	1	1	1	0	0	-	0	0	0	0	1	1	0	0	1	1	0	0	0	0	1	1	0	0	0	1
S67_463587	67	0	1	0	1	-	0	0	1	0	0	0	0	0	1	0	0	0	1	0	0	1	1	1	1	1	0	1	0	1	1	0	0	1	1	0	0	1	1	0	1	0	0	1	1	0	0	0	0
S67_494114	67	0	1	0	1	0	0	0	1	0	1	0	0	0	1	0	0	0	1	0	0	1	1	1	1	1	0	1	1	1	1	0	0	1	0	0	0	1	1	0	1	0	0	1	1	0	0	0	1
S67_517749	67	0	1	0	1	0	0	0	1	0	1	0	0	0	1	1	0	0	1	0	0	1	1	1	1	1	0	1	0	0	1	0	0	1	1	0	0	1	1	0	1	0	0	1	1	0	0	0	1
S67_526492	67	0	1	0	1	-	0	0	1	0	1	0	0	0	1	0	0	0	-	0	0	1	1	1	1	1	0	1	1	1	0	0	0	1	0	0	0	1	1	0	0	0	0	1	1	0	0	0	1
S67_526638	67	0	1	0	1	0	-	0	1	0	-	0	0	0	1	-	-	0	0	0	0	1	0	1	0	1	0	1	0	0	1	0	0	1	0	0	0	1	1	0	0	0	0	1	1	0	0	0	1
S67_550066	67	0	1	0	1	0	0	0	1	0	1	0	0	0	1	0	0	0	0	0	0	1	1	1	1	1	0	1	0	0	1	0	0	1	1	0	0	1	1	0	1	0	0	1	1	0	0	0	1
S67_576235	67	0	1	0	1	0	0	0	1	0	1	0	0	0	1	-	0	0	0	0	0	1	1	1	1	1	0	1	0	-	-	0	0	1	0	0	0	1	0	0	1	0	0	1	1	0	0	0	1
	67 Average	0	0.96	0	0.92	0	0	0	0.92	0	0.791667	0	0	0	0.92	0.266667	0	0	0.5	0	0	0.84	0.92	0.88	0.92	0.88	0.56	0.28	0.0833333	0.545455	0.75	0	0	0.88	0.652174	0	0	1	0.84	0	0.72	0	0	0.88	0.92	0	0	0	0.84
S69_69880	69	0	1	0	0	0	0	0	0	0	0	1	0	1	0	-	1	0	0	1	0	1	0	0	1	0	1	0	1	0	0	1	0	0	1	0	0	0	0	1	0	0	1	1	0	0	1	1	0
S69_81663	69	0	1	0	0	0	0	0	0	0	-	1	0	1	0	-	1	0	-	1	0	1	0	0	1	0	1	0	1	0	0	1	0	0	1	0	0	1	0	1	0	0	1	1	0	1	1	1	0
S69_81899	69	0	1	0	0	0	0	0	0	0	0	1	0	1	0	1	1	0	0	1	0	0	0	0	1	0	1	0	1	0	0	1	0	0	1	0	0	1	0	1	0	0	1	1	0	1	1	1	0
	69 Average	0	1	0	0	0	0	0	0	0	0	1	0	1	0	1	1	0	0	1	0	0.666667	0	0	1	0	1	0	1	0	0	1	0	0	1	0	0	0.666667	0	1	0	0	1	1	0	0.666667	1	1	0
S70_10962	70	-	1	0	1	0	0	0	1	1	0	0	0	1	0	0	0	1	0	0	0	0	0	0	0	0	1	0	1	0	0	0	0	0	0	1	1	0	0	1	1	0	0	0	0	1	1	1	0
S70_70273	70	1	1	0	1	-	0	0	1	1	0	0	0	1	0	0	0	1	0	0	0	1	0	0	0	0	1	0	0	1	0	0	0	0	-	1	1	0	0	1	1	0	0	0	0	1	1	-	0
S70_388755	70	1	1	0	1	0	0	0	1	1	0	0	0	1	0	0	0	1	0	0	0	1	0	0	0	0	1	0	1	0	0	0	0	0	0	1	1	0	0	1	1	0	0	0	0	1	1	0	0
S70_500277	70	1	1	0	1	0	1	0	1	1	0	0	0	1	0	0	0	1	0	0	0	1	0	0	0	0	1	0	1	1	0	0	0	0	0	1	1	0	0	1	1	0	0	0	0	1	1	0	0
	70 Average	1	1	0	1	0	0.25	0	1	1	0	0	0	1	0	0	0	1	0	0	0	0.75	0	0	0	0	1	0	0.75	0.5	0	0	0	0	0	1	1	0	0	1	1	0	0	0	0	1	1	0.333333	0
S71_15855	71	0	1	0	0	1	0	0	0	0	1	1	0	1	1	0	1	0	1	1	1	0	1	1	1	1	0	1	1	0	1	1	1	1	0	1	1	1	0	1	0	1	1	1	0	0	1	1	1
	71 Average	0	1	0	0	1	0	0	0	0	1	1	0	1	1	0	1	0	1	1	1	0	1	1	1	1	0	1	1	0	1	1	1	1	0	1	1	1	0	1	0	1	1	1	0	0	1	1	1
S72_9990	72	1	1	0	1	0	1	0	1	1	0	0	0	1	0	0	0	1	0	0	0	1	0	0	1	0	1	0	1	1	0	0	0	0	0	1	1	0	0	1	1	1	0	0	0	1	1	0	0
S72_26024	72	1	1	0	1	0	1	0	1	1	0	0	0	1	0	0	0	1	0	0	0	1	0	0	1	0	1	0	1	1	0	0	0	0	0	1	1	0	0	1	1	1	0	0	0	1	1	0	0
S72_88975	72	1	1	0	1	0	1	0	1	1	0	0	0	1	0	0	0	1	0	0	0	0	0	0	1	0	0	0	1	1	0	0	0	0	0	0	1	0	0	1	1	1	0	0	0	1	1	0	0
S72_93485	72	1	1	0	1	0	1	0	1	1	0	0	0	1	0	0	0	1	0	0	0	1	0	0	1	0	1	0	1	0	0	0	0	0	0	1	1	0	0	1	1	1	0	0	0	1	1	0	0
S72_192932	72	1	1	0	1	0	1	0	1	1	0	0	0	1	0	0	0	1	0	0	0	1	0	0	1	0	1	0	1	1	0	0	0	0	0	1	1	0	0	1	1	1	0	0	0	1	1	0	0
S72_194466	72	1	1	0	1	0	1	0	1	1	0	0	0	1	0	0	0	1	0	0	0	1	0	0	1	0	1	0	1	1	0	0	0	0	0	1	1	0	0	1	1	1	0	0	0	1	1	0	0
S72_214966	72	1	1	1	1	0	1	0	1	1	0	0	0	1	0	0	0	1	0	0	0	1	0	0	1	0	1	0	1	1	0	0	0	0	0	1	1	0	0	1	1	1	0	0	0	1	1	0	0
S72_222489	72	0	1	0	1	0	1	0	1	1	0	0	0	1	0	0	0	1	0	0	0	1	0	0	1	0	1	0	1	1	0	0	0	0	0	1	1	0	0	1	1	1	0	0	0	1	1	0	0
S72_347496	72	1	0	0	1	0	0	0	1	1	0	0	0	1	0	0	0	1	0	0	0	1	0	0	1	0	1	0	1	0	0	0	0	0	0	1	1	0	0	1	1	1	0	0	0	-	1	0	0
S72_347634	72	1	1	0	1	0	1	0	1	1	0	0	0	1	0	0	0	1	0	0	0	1	0	0	1	0	1	0	1	1	0	0	0	0	0	1	1	0	0	1	1	1	0	0	0	1	1	0	0
S72_376446	72	1	1	0	1	0	0	0	1	1	0	0	0	1	0	-	0	1	0	0	0	1	0	0	1	0	1	0	1	1	0	0	0	0	0	1	1	0	0	1	1	1	0	0	0	0	1	0	0
S72_419469	72	1	1	0	1	0	1	0	1	1	0	0	0	1	0	0	0	1	0	0	0	1	0	0	1	0	1	0	1	1	0	0	0	0	0	1	1	0	0	1	1	1	0	0	0	1	1	0	0
S72_422191	72	1	1	0	1	0	0	0	1	1	0	0	0	1	0	0	0	1	0	0	0	1	0	0	1	0	1	0	1	0	0	0	0	0	0	1	1	0	0	1	1	1	0	0	0	1	1	0	0
S72_469089	72	1	1	0	1	0	1	0	1	1	0	0	0	1	0	0	0	1	0	0	0	1	0	0	1	0	1	0	1	1	0	0	0	0	0	1	1	0	0	1	1	1	0	0	0	1	1	0	0
S72_495438	72	0	1	0	1	0	-	0	1	1	0	0	-	1	0	0	0	1	0	0	0	1	0	0	0	0	1	0	1	1	1	0	0	0	0	1	1	0	0	1	0	1	0	0	0	-	1	0	0
S72_500841	72	0	1	0	1	-	1	0	1	1	0	0	0	1	0	-	0	1	0	0	0	0	0	0	1	0	1	0	1	0	0	0	0	0	0	0	1	0	0	1	1	1	0	0	0	-	1	0	0
S72_518154	72	1	1	0	1	0	1	0	1	1	0	0	0	1	0	0	0	1	0	0	0	1	0	0	1	0	1	0	1	1	0	0	0	0	0	1	1	0	0	1	1	1	0	0	0	1	1	0	0
S72_519041	72	1	1	0	1	0	-	0	1	1	0	0	0	1	0	0	0	1	0	0	0	1	0	0	1	0	1	0	1	1	0	0	0	0	0	1	1	0	0	1	1	1	0	0	0	0	1	0	0
S72_562500	72	1	1	0	0	0	1	0	1	1	0	0	0	1	0	-	0	1	0	0	0	1	0	0	1	0	1	0	1	1	0	0	0	0	0	0	1	0	0	1	1	1	0	0	0	1	1	0	0
S72_598525	72	1	1	0	1	0	1	0	1	0	0	0	0	0	0	0	0	1	0	0	0	1	0	0	1	0	1	0	1	0	0	0	0	0	0	1	1	0	0	1	1	1	0	0	0	0	1	0	0
S72_615847	72	1	1	0	1	0	-	0	1	1	0	0	0	1	0	0	0	1	0	0	0	1	0	0	1	0	1	0	1	0	0	0	0	0	0	1	1	0	0	1	1	0	0	0	0	-	1	0	0
S72_615970	72	1	1	0	1	0	0	0	1	1	0	0	0	1	0	-	0	0	0	0	0	1	0	0	1	0	0	0	1	0	0	0	0	0	0	1	1	0	0	1	1	1	0	0	0	-	1	0	0
S72_627664	72	1	1	0	1	0	0	0	1	1	0	0	0	1	0	0	0	1	0	0	0	1	0	0	1	0	1	0	1	1	0	0	0	0	0	1	1	0	0	1	1	1	0	0	0	1	1	0	0
S72_628850	72	1	1	0	1	0	1	0	1	1	0	0	0	1	0	0	0	1	0	0	0	0	0	0	1	0	0	0	1	1	0	0	0	0	0	0	1	0	0	1	1	1	0	0	0	1	1	0	0
S72_632725	72	1	1	0	1	0	0	0	1	0	0	0	0	0	0	0	0	1	0	0	0	1	0	0	1	0	1	0	1	-	1	0	0	0	0	1	1	0	0	1	1	1	0	0	0	0	1	0	0
S72_633131	72	1	1	0	1	0	1	0	1	1	0	0	0	1	0	0	0	1	0	0	0	0	0	0	1	0	0	0	1	1	0	0	0	0	0	0	1	0	0	1	1	1	0	0	0	1	1	0	0
S72_633269	72	1	1	0	1	0	1	0	1	1	0	0	0	1	0	0	0	1	0	0	0	0	0	0	1	0	1	0	1	1	0	0	0	0	0	1	1	0	0	1	1	1	0	0	0	1	1	0	0
S72_650734	72	1	1	0	1	0	1	0	1	1	0	0	0	1	0	0	0	1	0	0	0	1	0	0	1	0	1	0	1	1	0	0	0	0	0	1	1	0	0	1	1	1	0	0	0	1	1	0	0
S72_660155	72	1	1	0	1	0	1	0	1	1	0	0	0	1	0	0	0	1	0	0	0	1	0	0	1	0	1	0	1	1	0	0	0	0	0	1	1	0	0	1	1	1	0	0	0	1	1	0	0
S72_689067	72	1	1	0	1	0	0	0	1	1	0	0	0	1	0	0	0	1	0	0	0	1	0	0	1	0	1	0	1	1	0	0	0	0	0	1	1	0	0	1	1	1	0	0	0	1	1	0	0
S72_705823	72	1	1	0	1	0	1	0	1	1	0	0	0	1	0	0	0	1	0	0	0	1	0	0	1	0	1	0	1	1	0	0	0	0	0	1	1	0	0	1	1	1	0	0	0	1	1	0	0
S72_745800	72	1	1	0	1	-	0	0	1	1	0	1	0	1	0	-	0	0	0	0	0	0	0	0	1	0	1	0	0	1	0	0	0	0	0	0	1	0	0	1	-	1	0	0	0	1	1	0	0
S72_774150	72	1	1	0	1	0	1	0	1	1	0	1	0	1	0	0	0	1	0	0	0	0	0	0	1	0	1	0	1	1	0	0	0	0	0	1	1	0	0	1	1	1	0	0	0	1	1	0	0
S72_789676	72	1	1	0	1	0	-	0	1	1	0	1	-	0	0	-	0	1	0	0	0	1	0	0	1	0	1	0	1	0	0	0	0	0	0	1	1	0	0	1	1	-	0	0	0	1	1	0	0
	72 Average	0.911765	0.970588	0.0294118	0.970588	0	0.733333	0	1	0.941176	0	0.0882353	0	0.911765	0	0	0	0.941176	0	0	0	0.794118	0	0	0.970588	0	0.882353	0	0.970588	0.757576	0.0588235	0	0	0	0	0.823529	1	0	0	1	0.969697	0.969697	0	0	0	0.862069	1	0	0
S74_55013	74	0	1	0	0	-	0	1	1	0	0	0	0	1	0	-	1	0	0	1	0	1	0	0	0	0	0	1	0	1	1	1	0	1	0	0	0	1	1	0	0	0	0	0	0	1	0	0	0
S74_77953	74	0	1	0	0	-	0	1	1	0	0	0	0	1	0	-	-	0	0	1	0	1	0	0	0	0	0	1	0	1	1	1	0	1	0	0	0	1	1	0	0	0	0	0	0	0	0	0	0
S74_100669	74	0	1	0	0	1	1	1	1	0	0	0	0	1	0	1	1	0	0	1	0	1	0	0	0	0	0	1	0	1	1	1	0	1	0	0	0	1	1	0	0	0	0	0	0	1	0	0	0
S74_132688	74	0	1	0	0	1	0	1	1	0	0	0	0	1	0	0	1	0	0	1	0	1	0	0	0	0	0	1	0	1	0	1	0	1	0	0	0	1	1	0	0	0	0	0	0	1	0	0	0
S74_136190	74	0	1	0	0	1	1	1	1	0	0	0	0	1	0	-	1	0	0	1	0	1	0	0	0	0	0	0	0	-	1	1	0	-	0	0	0	1	1	0	0	0	0	0	0	1	0	0	0
S74_196776	74	0	1	0	0	0	1	1	1	0	0	0	0	1	0	1	1	0	0	1	0	1	0	0	0	0	0	1	0	1	0	1	0	1	0	0	0	1	1	0	0	0	0	0	0	1	0	0	0
S74_235303	74	0	1	0	0	1	0	1	1	0	0	0	0	1	0	-	1	0	0	1	0	1	0	0	0	0	0	1	0	1	-	1	0	1	0	0	0	1	1	0	0	0	0	0	0	0	0	0	0
S74_322190	74	-	1	0	0	1	0	0	1	0	0	0	0	1	1	-	1	0	0	1	0	1	0	0	0	0	0	1	0	0	1	1	0	0	0	0	0	1	0	0	0	0	0	0	0	0	0	0	0
S74_480448	74	0	1	0	0	0	0	1	1	0	0	0	0	1	1	0	1	0	0	1	0	0	0	0	0	0	0	-	0	0	1	1	0	0	0	0	0	1	1	0	0	0	0	0	0	1	0	0	0
S74_495340	74	0	1	0	0	1	1	1	1	0	0	0	0	1	1	1	1	0	0	1	0	1	0	0	0	0	0	1	0	1	1	1	0	1	0	0	0	1	1	0	0	0	0	0	0	1	0	0	0
S74_519354	74	0	1	0	0	1	0	1	1	0	-	0	0	1	0	0	1	0	0	1	0	1	0	0	0	0	0	1	0	0	1	1	0	1	0	0	0	1	1	0	0	0	0	0	0	0	0	0	0
S74_519454	74	0	1	0	0	0	0	1	0	0	0	0	0	1	1	0	1	0	0	1	0	1	0	0	0	0	0	1	0	1	0	1	0	0	0	0	0	1	1	0	0	0	0	0	0	0	0	0	0
S74_617035	74	0	1	0	0	1	1	1	1	0	0	0	0	1	1	0	1	0	0	1	0	1	0	0	0	0	0	1	0	1	1	1	0	1	0	0	0	1	1	0	0	0	0	0	0	1	0	0	0
S74_634789	74	0	1	0	0	0	0	1	1	0	0	0	0	1	1	1	0	0	0	1	0	1	0	0	0	0	0	1	0	0	1	1	0	1	0	0	0	1	1	0	0	0	0	0	0	0	0	0	0
S74_927358	74	0	1	0	0	0	0	1	1	0	0	0	0	1	1	1	1	0	0	0	0	1	0	0	0	0	0	1	0	0	0	1	0	1	0	0	0	0	0	0	0	0	0	0	0	0	0	0	0
S74_927472	74	0	1	0	0	0	1	1	1	0	0	0	0	1	1	0	1	0	0	1	0	1	0	0	0	0	0	1	0	0	0	1	0	1	0	0	0	1	1	0	0	0	0	0	0	1	0	0	0
S74_960502	74	0	1	0	0	1	0	1	1	0	0	0	0	1	1	0	1	0	0	1	0	1	0	0	0	0	0	1	0	1	1	1	0	1	0	0	0	1	1	0	0	0	0	0	0	1	0	0	0
S74_970217	74	0	1	0	0	0	1	1	0	0	0	0	0	1	1	1	1	0	0	1	0	1	0	0	0	0	0	1	0	1	1	1	0	1	0	0	0	1	1	0	0	0	0	0	0	1	0	0	0
S74_994923	74	-	1	-	-	1	1	1	1	-	-	-	-	1	1	0	1	-	-	1	-	1	-	-	-	-	-	1	-	1	0	1	-	1	-	-	-	1	1	-	-	-	-	-	-	0	-	-	-
S74_1059853	74	0	1	0	0	0	0	1	1	0	0	0	0	1	1	0	1	0	0	1	0	1	0	0	0	0	0	1	0	1	1	1	0	1	0	0	0	1	1	0	0	0	0	0	0	1	0	0	0
S74_1348944	74	0	1	0	0	1	1	1	1	0	0	0	0	1	1	1	1	0	0	1	0	1	0	0	0	0	0	1	0	1	1	1	0	1	0	0	0	1	1	0	0	0	0	0	0	1	0	0	0
S74_1630146	74	0	1	0	0	1	1	1	1	0	0	0	0	1	1	0	1	0	0	1	0	0	0	0	0	0	0	1	0	1	1	1	0	1	0	0	0	1	1	0	0	0	0	0	0	0	0	0	0
S74_1646603	74	0	1	0	0	-	0	1	0	0	0	0	0	1	1	0	1	0	0	1	0	0	0	0	0	0	0	1	0	1	0	1	0	1	0	0	0	0	1	0	0	0	0	0	0	0	0	0	0
S74_1763738	74	0	1	0	0	0	1	1	0	0	0	0	0	1	1	1	1	0	0	1	0	1	0	0	0	0	0	1	0	1	1	1	0	1	0	0	0	1	1	0	0	0	0	0	0	1	0	0	0
S74_1770150	74	0	1	0	0	1	0	1	1	0	0	0	0	1	1	1	0	0	0	1	0	1	0	0	0	0	0	1	0	0	1	1	0	1	0	0	0	1	1	0	0	0	0	0	0	1	0	0	0
S74_1781781	74	0	1	0	0	1	1	1	1	0	0	0	0	1	1	-	1	0	0	1	0	1	0	0	0	0	0	1	0	1	-	1	0	1	0	0	0	1	1	0	0	0	0	0	0	1	0	0	0
	74 Average	0	1	0	0	0.608696	0.461538	0.961538	0.846154	0	0	0	0	1	0.692308	0.45	0.92	0	0	0.961538	0	0.884615	0	0	0	0	0	0.96	0	0.72	0.708333	1	0	0.88	0	0	0	0.923077	0.923077	0	0	0	0	0	0	0.615385	0	0	0
S75_19079	75	0	0	0	1	1	1	0	0	0	0	1	0	1	1	0	1	0	0	1	0	1	0	0	0	1	0	1	1	1	1	0	1	0	0	1	1	0	0	0	0	1	1	0	1	1	1	1	0
S75_21303	75	0	0	0	1	1	1	0	0	0	0	1	0	1	1	0	1	0	0	1	0	1	0	0	0	1	0	1	1	1	1	0	1	0	0	1	1	0	0	0	0	1	1	0	1	1	1	1	0
S75_89864	75	0	0	0	1	0	1	0	0	0	0	1	0	0	1	0	1	0	0	0	0	0	0	0	0	1	0	1	1	0	0	0	1	0	0	1	1	0	0	0	0	1	1	0	1	1	1	1	0
S75_106843	75	0	0	1	1	1	1	0	0	0	0	1	0	1	1	0	1	0	0	1	0	0	0	0	0	1	0	1	1	1	1	0	1	0	0	1	1	0	0	0	0	1	1	0	1	1	1	1	0
S75_261830	75	0	0	0	1	1	1	0	0	0	0	1	0	1	1	0	1	0	0	1	0	0	0	0	0	1	0	1	1	0	1	0	1	0	0	1	1	0	0	0	0	1	1	0	1	1	1	1	0
S75_267080	75	0	0	0	1	1	0	0	0	0	0	1	0	1	1	0	1	0	0	1	0	0	0	0	0	1	0	1	1	1	1	0	1	0	0	1	1	0	0	0	0	1	1	0	1	1	1	1	0
S75_300491	75	0	0	0	1	1	1	0	0	0	0	1	0	1	1	0	0	0	0	1	0	0	0	0	0	1	0	1	1	1	1	0	1	0	0	1	1	0	0	0	0	1	1	0	1	1	1	1	0
S75_303227	75	0	0	0	0	0	0	0	0	0	0	1	0	0	1	0	1	0	0	1	0	1	0	0	0	1	0	1	0	1	0	0	1	0	0	1	1	0	0	0	0	0	1	0	0	1	1	1	0
	75 Average	0	0	0.125	0.875	0.75	0.75	0	0	0	0	1	0	0.75	1	0	0.875	0	0	0.875	0	0.375	0	0	0	1	0	1	0.875	0.75	0.75	0	1	0	0	1	1	0	0	0	0	0.875	1	0	0.875	1	1	1	0
S76_76260	76	0	1	0	0	1	0	1	1	0	0	0	0	1	1	0	-	0	0	1	0	0	0	0	0	0	0	1	0	1	1	1	0	1	0	0	0	1	1	0	0	0	0	0	0	0	0	0	0
S76_76381	76	0	1	0	0	0	0	1	0	0	0	0	0	0	1	1	1	0	0	1	0	1	0	0	0	0	0	1	0	0	1	1	0	1	0	0	0	1	1	0	0	0	0	0	0	0	0	0	0
S76_292614	76	0	1	0	0	1	1	1	1	0	0	0	0	0	1	0	0	0	0	1	0	1	0	0	0	0	0	1	0	1	0	0	0	0	0	0	0	1	1	0	0	0	0	-	0	0	0	0	0
	76 Average	0	1	0	0	0.666667	0.333333	1	0.666667	0	0	0	0	0.333333	1	0.333333	0.5	0	0	1	0	0.666667	0	0	0	0	0	1	0	0.666667	0.666667	0.666667	0	0.666667	0	0	0	1	1	0	0	0	0	0	0	0	0	0	0
S77_49771	77	0	0	0	1	0	0	0	0	0	0	1	0	1	0	0	1	0	0	0	1	0	0	0	0	1	0	1	1	1	1	0	1	0	0	1	1	0	0	0	0	1	1	0	1	1	1	1	0
S77_98043	77	0	0	0	1	0	0	0	0	0	0	1	0	1	0	-	1	0	0	0	1	0	0	0	0	1	0	1	1	1	1	0	1	0	0	1	1	0	0	0	0	1	1	0	1	1	1	1	0
S77_198503	77	0	0	0	1	0	0	0	0	0	0	1	0	1	0	-	1	0	0	0	1	0	0	0	0	1	0	1	1	1	1	0	1	0	0	1	1	0	0	0	0	1	1	0	1	0	1	1	0
S77_277611	77	0	0	0	1	0	0	0	0	0	0	1	0	1	0	0	1	0	0	0	1	0	0	0	0	1	0	1	1	0	1	0	1	0	0	1	1	0	0	0	0	1	1	0	1	1	1	1	0
S77_333871	77	0	0	0	1	1	-	0	0	0	0	1	0	1	1	0	0	0	0	0	1	0	0	0	0	1	0	1	1	1	1	0	1	0	0	1	1	0	0	0	0	1	1	0	1	0	1	1	0
	77 Average	0	0	0	1	0.2	0	0	0	0	0	1	0	1	0.2	0	0.8	0	0	0	1	0	0	0	0	1	0	1	1	0.8	1	0	1	0	0	1	1	0	0	0	0	1	1	0	1	0.6	1	1	0
S78_241721	78	0	1	0	0	0	0	0	0	0	0	1	0	1	0	1	1	0	0	1	0	0	0	0	1	0	1	0	1	0	0	1	0	0	1	0	0	1	0	0	0	0	1	1	0	1	1	1	0
S78_318185	78	0	1	0	0	0	0	0	0	0	0	1	0	0	0	1	1	0	0	1	0	1	0	0	1	0	1	0	1	0	0	1	0	0	1	0	0	1	0	1	0	0	1	1	0	1	1	1	0
S78_676865	78	0	1	0	0	0	-	0	0	0	0	1	0	1	0	0	1	0	0	1	0	0	0	0	1	0	1	0	0	0	0	1	0	0	0	0	0	1	0	1	0	0	1	1	0	-	1	0	0
S78_691984	78	0	1	0	0	0	0	0	0	0	0	1	0	1	0	-	0	0	0	1	0	0	0	0	1	0	1	0	1	0	0	1	0	0	1	0	0	1	-	1	0	0	1	0	0	0	1	1	0
S78_801887	78	0	1	0	0	0	0	0	0	0	0	1	0	1	0	-	-	0	0	1	0	0	0	0	1	0	1	0	1	0	0	1	0	0	0	0	0	1	0	1	0	0	1	1	0	0	1	1	0
S78_989402	78	0	1	0	0	0	0	0	0	0	0	1	0	1	0	1	1	0	0	1	0	0	0	0	1	0	1	0	1	0	0	1	0	0	1	0	0	1	0	1	0	0	1	1	0	0	1	1	0
S78_991601	78	0	1	0	0	0	0	0	0	0	0	1	0	0	0	1	0	0	0	1	0	1	0	0	1	0	1	0	1	0	0	1	-	0	1	0	0	1	0	1	0	0	1	1	0	1	1	0	0
S78_1009348	78	0	1	0	0	0	0	0	0	0	0	1	0	1	0	0	1	0	0	1	0	0	0	0	1	0	1	0	1	0	0	1	0	0	1	0	0	1	0	1	0	0	1	1	0	1	1	1	0
S78_1009455	78	0	1	0	0	0	0	0	0	0	0	1	0	1	0	1	1	0	0	1	0	1	0	0	1	0	1	0	1	0	0	1	0	0	1	0	0	1	0	1	0	0	1	1	0	1	1	1	0
S78_1009567	78	0	1	0	0	0	0	0	0	0	0	1	0	1	0	0	1	0	0	1	0	0	0	0	1	0	1	0	1	0	0	1	0	0	1	0	0	1	0	1	0	0	1	1	0	1	1	1	0
S78_1212568	78	0	1	0	0	0	0	0	0	0	0	1	0	1	0	1	1	0	0	1	0	1	0	0	1	0	1	0	1	0	0	1	0	0	1	0	0	1	0	1	0	0	1	1	0	1	1	1	0
S78_1213110	78	0	1	0	0	0	0	0	0	0	0	1	0	1	0	0	1	0	0	1	0	1	0	0	1	0	1	0	1	0	0	1	0	0	1	0	0	1	0	1	0	0	1	1	0	1	1	1	0
S78_1245055	78	0	1	0	0	0	0	0	0	0	0	1	0	1	0	-	1	0	0	1	0	1	0	0	1	0	0	0	1	0	0	1	0	0	1	0	0	1	0	1	0	0	1	1	0	0	1	0	0
S78_1332746	78	0	1	1	1	-	-	-	0	1	0	1	0	0	0	0	0	0	0	1	1	0	1	1	0	1	1	0	0	1	-	1	0	1	0	1	1	1	-	1	0	0	1	0	0	0	0	0	1
S78_1429923	78	0	1	0	0	0	0	0	0	0	0	0	0	1	0	0	1	0	0	1	0	0	0	0	1	0	0	0	1	0	0	0	0	0	1	0	0	1	0	1	0	0	1	1	0	1	1	1	0
S78_1685608	78	0	1	0	0	0	-	0	0	0	0	1	0	1	0	1	1	0	-	1	0	1	0	0	1	0	1	0	1	0	0	1	0	0	0	0	0	1	-	0	0	0	1	1	0	1	1	1	0
S78_1689759	78	0	1	0	0	0	0	0	0	0	0	1	0	1	0	1	1	0	0	1	0	0	0	0	1	0	1	0	1	0	0	1	0	0	1	0	0	1	0	1	0	0	1	1	0	0	1	1	0
S78_1854877	78	0	1	0	0	1	0	0	0	0	0	0	0	1	0	-	1	0	0	1	0	1	0	0	1	0	0	0	1	0	0	0	0	0	1	0	0	1	0	1	0	0	1	1	0	1	0	1	0
	78 Average	0	1	0.0555556	0.0555556	0.0588235	0	0	0	0.0555556	0	0.888889	0	0.833333	0	0.571429	0.823529	0	0	1	0.0555556	0.444444	0.0555556	0.0555556	0.944444	0.0555556	0.833333	0	0.888889	0.0555556	0	0.888889	0	0.0555556	0.777778	0.0555556	0.0555556	1	0	0.888889	0	0	1	0.888889	0	0.647059	0.888889	0.777778	0.0555556
S79_28058	79	0	1	0	1	0	-	0	1	0	1	0	0	0	1	0	0	0	0	0	0	1	1	1	1	1	1	0	0	1	1	0	0	1	0	0	0	1	1	0	1	0	0	1	1	0	0	0	1
S79_30240	79	0	1	0	1	0	0	0	1	0	1	0	0	0	1	0	0	0	1	0	0	0	1	1	1	1	1	0	0	1	1	0	0	1	1	0	0	1	1	0	0	0	0	1	1	-	0	0	1
S79_39728	79	0	1	0	1	0	0	0	1	0	1	0	0	0	1	-	0	0	1	0	0	1	1	1	1	1	1	0	0	1	1	0	0	0	1	0	0	1	1	0	1	0	0	1	1	0	0	0	1
S79_49806	79	0	1	0	1	0	0	0	1	0	1	0	0	0	1	0	0	0	1	0	0	1	0	1	1	1	1	0	0	0	0	0	0	1	1	0	0	1	1	0	1	0	0	0	1	0	0	0	1
S79_154720	79	0	1	0	1	0	0	0	1	0	1	0	0	0	1	1	0	0	1	0	0	1	1	1	1	1	1	0	0	1	1	0	0	1	1	0	0	1	1	0	1	0	0	1	1	0	0	0	1
S79_225851	79	0	1	0	1	0	0	0	1	0	-	0	0	0	0	-	0	0	0	0	0	1	0	1	1	0	1	0	0	0	1	0	0	0	1	0	0	1	1	0	1	0	0	1	1	0	0	0	0
S79_256251	79	0	1	0	1	0	0	0	1	0	1	0	0	0	1	1	0	0	1	0	0	1	1	1	1	0	1	0	0	1	1	0	0	1	1	0	0	1	1	0	1	0	0	1	1	0	0	0	1
S79_256351	79	0	0	0	1	-	0	0	0	0	1	0	-	-	0	-	0	0	0	0	0	0	1	1	1	0	0	1	0	1	0	0	0	1	1	0	0	1	-	0	1	0	0	1	1	-	0	0	1
S79_257786	79	0	1	0	1	0	0	0	1	0	1	0	0	0	1	-	0	0	0	0	0	1	1	1	1	0	1	0	0	-	1	0	0	1	1	0	0	1	1	0	1	0	0	1	1	0	0	0	1
S79_258159	79	0	0	0	0	0	0	0	0	0	0	0	0	1	1	0	1	0	0	1	0	0	0	0	0	0	0	0	0	1	1	0	1	0	0	1	0	0	0	0	0	1	0	0	0	1	0	1	0
S79_361328	79	0	1	0	1	0	0	0	1	0	1	0	0	0	1	0	0	0	0	0	0	1	1	1	1	0	1	0	0	0	0	0	0	1	0	0	0	1	1	0	1	0	0	1	1	0	0	0	1
S79_493600	79	0	1	0	1	-	-	0	1	0	1	0	0	0	-	1	0	0	1	0	0	1	1	1	1	0	1	0	0	0	1	0	0	0	1	0	0	1	0	0	0	0	0	1	1	0	0	0	1
S79_502916	79	1	1	1	0	-	-	1	1	-	-	1	0	1	1	-	0	1	1	1	1	1	-	0	1	1	1	1	1	0	-	1	1	1	0	0	1	0	0	1	0	1	0	1	1	0	1	1	1
S79_504080	79	0	1	0	1	-	0	0	1	0	1	0	0	0	0	0	0	0	1	0	0	0	1	1	1	0	1	0	0	0	0	0	0	1	1	0	0	1	0	0	1	0	0	-	1	-	0	0	1
S79_514097	79	-	1	0	1	0	0	0	1	0	0	0	0	0	1	-	0	0	0	0	0	0	1	1	1	0	1	0	0	0	1	0	0	1	0	0	0	0	-	0	1	0	0	1	1	0	0	0	1
S79_514234	79	0	1	0	1	0	-	0	1	0	1	0	0	0	1	0	-	0	0	0	0	1	1	1	1	0	1	0	0	-	1	0	0	1	1	0	0	1	1	0	1	0	0	1	1	0	0	0	1
S79_522482	79	0	1	0	1	-	0	0	1	0	1	0	0	0	1	1	0	-	1	0	0	1	1	1	1	0	1	0	0	1	1	0	0	0	0	0	0	1	0	0	1	0	0	1	1	0	0	0	0
S79_579748	79	0	0	0	0	1	1	1	0	1	1	1	1	1	1	0	1	0	1	1	1	1	0	0	1	1	0	1	0	1	1	1	1	0	0	1	1	1	0	1	1	1	0	0	0	1	1	1	0
S79_624760	79	0	0	-	1	-	-	0	0	0	-	0	0	0	1	0	-	0	1	0	0	0	1	1	0	0	0	0	0	1	1	0	0	1	1	0	0	1	1	0	0	0	0	1	1	0	0	0	1
S79_626615	79	-	1	0	1	0	-	0	1	0	1	0	0	0	1	-	0	0	0	0	0	0	1	1	0	0	1	0	0	1	1	0	-	1	1	0	0	0	1	0	1	0	0	1	1	-	0	0	1
S79_635328	79	0	1	0	1	-	0	0	1	0	0	0	0	0	0	-	0	0	1	0	0	1	1	1	1	0	0	-	0	-	0	0	0	1	0	0	0	1	0	0	1	0	0	0	1	0	0	0	1
S79_640850	79	0	1	0	1	0	0	0	1	0	1	0	0	0	1	1	0	0	1	0	0	1	1	1	1	0	1	0	0	1	1	0	0	1	1	0	0	1	1	0	1	0	0	1	1	0	0	0	1
S79_640967	79	0	1	0	1	0	0	0	1	0	1	0	0	0	1	1	0	0	1	0	0	1	1	1	1	0	1	0	0	1	1	0	0	1	1	0	0	1	1	0	1	0	0	1	1	0	0	0	1
S79_643090	79	0	1	0	1	-	-	0	1	0	1	0	0	0	1	-	-	0	1	0	0	1	1	1	1	0	1	0	0	1	-	0	0	0	-	0	0	1	0	0	1	0	0	1	1	0	0	0	1
S79_643194	79	0	1	0	1	0	-	0	1	0	1	0	0	0	1	0	0	0	1	0	0	1	1	1	1	0	1	0	0	1	0	0	0	1	1	0	0	1	1	0	1	0	0	1	1	0	0	0	1
S79_718420	79	0	1	0	1	0	0	0	1	0	0	0	0	0	1	1	0	0	0	0	0	0	1	1	1	0	1	0	0	1	1	0	0	0	1	0	0	1	1	0	1	0	0	1	1	0	0	0	1
S79_723580	79	0	1	0	1	0	0	0	1	0	1	0	0	0	1	1	0	0	1	0	0	1	1	1	1	0	1	0	0	1	1	0	0	1	1	0	0	1	1	0	1	0	0	1	1	0	0	0	1
S79_730308	79	0	1	0	1	0	0	0	1	0	1	0	0	0	1	0	0	0	0	0	0	1	1	1	1	0	1	0	0	1	1	0	0	1	0	0	0	1	1	0	1	0	0	1	1	0	0	0	1
S79_733586	79	0	1	0	1	0	0	0	1	0	1	0	0	0	1	1	0	0	1	0	0	1	1	1	1	0	1	0	0	1	1	0	0	1	1	0	0	1	1	0	1	0	0	1	1	0	0	0	1
S79_783247	79	0	1	0	1	0	0	0	1	0	1	0	0	0	1	-	-	0	0	0	0	0	1	1	1	0	0	0	0	0	1	0	0	1	0	0	0	0	1	0	1	0	0	1	1	0	0	0	0
S79_790803	79	0	1	0	1	0	0	0	1	0	1	0	0	0	1	-	0	0	1	0	0	1	1	1	1	0	1	-	0	0	0	0	0	1	1	0	0	1	0	0	1	0	0	1	1	0	0	0	1
S79_790904	79	0	1	0	1	-	0	0	1	0	1	0	0	0	1	-	0	0	0	0	0	1	1	1	1	0	1	0	0	0	1	0	0	1	1	0	0	1	1	0	1	0	0	1	1	0	0	0	1
S79_804945	79	0	1	0	1	0	0	0	1	0	-	0	-	0	0	0	0	0	0	0	0	0	1	1	1	0	-	0	0	1	1	0	0	0	0	0	0	1	1	0	0	0	0	1	1	0	0	0	1
S79_851549	79	0	1	0	1	0	0	0	1	0	1	0	0	0	1	1	0	0	1	0	0	1	1	1	1	0	1	0	0	1	1	0	0	1	1	0	0	1	1	0	1	0	0	1	1	0	0	0	1
S79_862877	79	0	1	0	1	0	0	0	1	0	1	0	0	0	1	0	0	0	1	0	0	0	1	1	1	0	1	0	0	0	-	0	0	1	1	0	0	1	1	0	1	0	0	0	1	0	0	0	1
S79_875294	79	0	1	0	1	0	0	0	1	0	1	0	0	0	1	0	0	0	1	0	0	1	1	1	1	0	1	0	0	1	1	0	0	1	1	0	0	1	1	0	1	0	0	1	1	0	0	0	1
S79_948249	79	0	1	0	1	0	0	0	1	0	0	0	0	0	1	1	0	0	1	0	0	1	1	1	1	0	1	0	0	1	1	0	0	1	1	0	0	1	1	0	1	0	0	1	1	0	0	0	1
S79_953919	79	0	1	0	1	0	0	0	1	0	1	0	0	0	1	0	0	0	1	0	0	1	1	1	1	0	1	0	0	1	1	0	0	1	0	0	0	1	1	0	1	0	0	1	1	0	0	0	1
S79_959410	79	0	1	0	1	0	0	0	1	0	1	0	0	0	1	1	0	0	1	0	0	1	1	1	1	0	1	0	0	1	1	0	0	1	1	0	0	1	1	0	1	0	0	1	1	0	0	0	1
S79_981077	79	0	1	0	1	0	0	0	1	0	1	0	0	0	1	1	0	0	1	0	0	1	1	1	1	0	1	0	0	0	1	0	0	1	0	0	0	0	1	0	1	0	0	1	1	0	0	0	1
S79_981465	79	0	1	0	1	0	0	0	1	0	1	0	0	0	0	0	0	0	1	0	0	1	1	1	1	0	1	0	0	1	0	0	0	1	1	0	0	1	1	0	1	0	0	1	1	0	0	0	1
S79_993003	79	0	1	0	1	0	0	0	1	0	1	0	0	0	1	0	0	0	1	0	0	1	1	1	1	0	1	0	0	0	1	0	0	1	1	0	0	1	1	0	1	0	0	1	1	0	0	0	1
S79_1018619	79	0	1	0	1	0	0	0	1	0	1	0	0	0	1	0	-	0	0	0	0	1	1	1	1	0	1	1	0	1	1	0	0	1	1	0	0	1	1	0	1	0	-	1	1	0	1	0	1
S79_1037044	79	0	1	0	1	0	0	0	1	0	1	0	0	0	0	0	0	0	1	0	0	1	1	1	1	0	1	0	0	1	1	0	0	1	1	0	0	1	1	0	1	0	0	1	1	0	0	0	1
S79_1047263	79	0	1	0	1	0	0	0	1	0	1	0	0	0	1	1	0	0	1	0	0	1	1	1	1	0	1	0	0	1	1	0	0	1	1	0	0	1	1	0	1	0	0	1	1	0	0	0	1
S79_1049496	79	0	1	0	1	0	-	0	1	0	1	0	0	0	1	1	0	0	1	0	0	1	1	1	0	0	1	0	0	1	1	0	0	1	1	0	0	1	1	0	1	0	0	1	1	0	0	0	1
S79_1061149	79	0	1	0	1	-	0	0	1	0	1	0	-	0	1	0	0	0	1	0	0	0	1	1	1	0	1	0	0	1	-	0	0	1	-	0	0	1	1	0	1	0	0	1	1	0	0	0	0
S79_1066912	79	0	1	0	1	0	0	0	1	0	1	0	0	0	1	-	0	0	1	0	0	1	1	1	1	0	1	0	0	0	1	0	0	0	-	0	0	1	1	0	1	0	0	1	1	-	0	0	0
S79_1068475	79	0	1	0	1	0	0	0	1	0	1	0	0	0	1	1	0	0	1	0	0	1	1	1	1	0	1	0	0	1	1	0	0	1	1	0	0	1	1	0	1	0	0	1	1	0	0	0	1
S79_1069792	79	0	1	0	1	0	0	0	1	0	1	0	0	0	1	0	0	0	1	0	0	1	1	1	1	0	1	0	0	1	1	0	0	1	1	0	0	1	1	0	1	0	0	1	1	0	0	0	1
S79_1073187	79	0	1	0	1	0	0	0	1	0	1	0	0	0	1	0	0	0	0	0	0	1	1	1	1	0	1	1	0	1	1	0	0	1	1	0	0	0	0	0	1	0	0	1	1	0	0	0	1
S79_1094812	79	0	1	0	1	0	0	0	1	0	1	0	0	0	1	1	0	0	1	0	0	1	1	1	1	0	1	0	0	1	1	0	0	1	1	0	0	1	1	0	1	0	0	1	1	0	0	0	1
S79_1141064	79	0	1	0	1	0	-	0	1	0	1	0	0	0	1	-	-	0	0	0	0	0	1	-	1	0	1	0	0	0	1	0	0	0	-	0	0	0	0	0	1	0	0	1	1	0	0	0	1
S79_1160932	79	0	1	0	1	0	0	0	1	0	1	0	0	0	1	1	0	0	1	0	0	1	1	1	1	0	1	0	0	1	1	0	0	1	1	0	0	1	1	0	1	0	0	1	1	0	0	0	1
S79_1161085	79	0	1	1	1	-	0	0	1	0	0	0	0	0	1	0	0	0	0	0	0	0	1	1	1	0	1	0	0	0	0	0	0	0	0	0	0	1	1	0	0	-	0	1	1	0	0	0	1
S79_1161268	79	0	1	0	1	0	0	0	1	0	1	0	0	0	1	0	0	0	1	0	0	1	1	1	1	0	1	0	0	1	1	0	0	0	1	0	0	1	1	0	1	0	0	1	1	0	0	0	1
S79_1179323	79	0	1	0	1	0	0	0	1	0	1	0	0	0	1	0	0	0	1	0	0	1	1	1	1	0	1	0	0	1	1	0	0	1	1	0	0	1	1	0	1	0	0	1	1	0	0	0	1
S79_1230949	79	0	1	0	1	0	-	0	1	0	1	0	0	0	1	0	0	0	1	0	0	1	1	1	1	0	1	0	0	1	1	0	0	1	1	0	0	1	1	0	1	0	0	1	1	0	0	0	1
S79_1246818	79	0	1	0	1	0	0	0	1	0	1	0	0	0	1	1	0	0	1	0	0	1	1	1	0	0	1	0	0	1	1	0	0	1	1	0	0	1	0	0	1	0	0	1	1	0	0	0	1
S79_1311588	79	0	1	0	1	-	0	0	0	0	1	0	0	0	1	-	0	0	1	0	0	1	1	1	1	0	1	0	0	1	0	0	0	1	1	0	0	1	1	0	1	0	0	1	0	0	0	0	1
S79_1338440	79	0	1	0	1	0	0	0	1	0	1	0	0	0	1	1	0	0	1	0	0	1	1	1	1	0	1	0	0	0	1	0	0	1	1	0	0	1	1	0	1	0	0	1	1	0	0	0	1
S79_1422747	79	0	1	0	1	0	0	0	1	0	1	0	0	0	1	0	0	0	1	0	0	1	1	1	1	0	1	0	0	0	0	0	0	0	0	0	0	1	1	0	1	0	0	1	1	0	0	0	1
S79_1423234	79	0	1	0	1	0	0	0	1	0	1	0	0	0	1	0	0	0	1	0	0	1	1	1	1	0	1	0	0	1	1	0	0	1	1	0	0	1	1	0	1	0	0	1	1	0	0	0	1
S79_1433938	79	0	1	0	1	0	0	0	1	0	1	0	0	0	1	0	0	0	1	0	0	1	1	1	1	0	1	0	0	1	1	0	0	1	1	0	0	1	1	0	1	0	0	1	1	0	0	0	1
S79_1437018	79	0	1	0	1	-	0	0	1	0	0	0	0	0	0	0	0	0	1	0	0	0	1	1	1	0	1	0	0	0	1	0	0	0	1	0	0	1	1	0	0	0	0	1	1	0	0	-	1
S79_1438803	79	0	1	0	1	0	0	0	1	1	1	0	0	0	1	-	0	0	1	0	0	1	1	1	1	0	1	0	0	1	1	0	0	1	1	0	0	1	0	0	1	0	0	1	1	0	0	0	1
S79_1438917	79	0	1	0	1	-	0	0	1	0	0	0	0	0	1	-	0	0	1	0	0	1	1	1	1	0	1	0	0	0	1	0	0	1	0	0	0	1	1	0	1	0	0	1	1	0	0	0	1
S79_1439522	79	0	1	0	1	0	0	0	1	0	1	0	0	0	1	0	0	0	1	0	0	1	1	1	1	0	1	0	0	0	1	0	0	1	1	0	0	1	1	0	1	0	0	1	1	0	0	0	1
S79_1443171	79	0	1	0	1	0	0	0	0	0	0	0	0	0	1	0	0	0	0	0	0	1	1	1	0	0	1	0	0	1	0	0	0	1	0	0	0	1	0	0	1	0	0	1	1	0	0	0	0
S79_1443520	79	0	1	0	1	0	0	0	1	0	1	0	0	0	0	0	0	0	1	0	0	0	1	1	1	0	1	0	0	1	0	0	0	1	0	0	0	1	1	0	1	0	0	1	1	0	0	-	0
S79_1453921	79	0	1	0	1	0	0	0	1	0	1	0	0	0	1	1	0	0	1	0	0	1	1	1	1	0	1	0	0	1	1	0	0	1	1	0	0	1	1	0	1	0	0	1	1	0	0	0	1
S79_1511317	79	0	1	0	1	0	0	0	1	0	1	0	0	0	1	0	0	0	1	0	0	1	1	1	1	0	1	0	0	1	0	0	0	1	1	0	0	1	1	0	1	0	0	1	1	0	0	0	1
S79_1513609	79	0	1	0	1	0	0	0	1	0	1	0	0	0	1	-	0	0	1	0	0	1	1	1	1	0	1	0	0	1	1	0	0	1	1	0	0	1	1	0	1	0	0	1	1	0	0	0	1
S79_1517858	79	0	1	0	1	-	-	0	1	0	-	0	0	0	1	0	0	0	1	0	0	1	1	1	1	0	1	0	0	0	0	0	0	1	-	0	0	1	0	0	1	0	0	1	1	-	0	0	0
S79_1518774	79	0	1	0	1	0	0	0	1	0	1	0	0	0	1	1	0	0	1	0	0	1	1	1	1	0	1	0	0	1	1	0	0	1	1	0	0	1	1	0	1	0	0	1	1	0	0	0	1
S79_1537202	79	0	1	0	1	0	0	0	1	0	0	0	0	0	1	-	-	0	0	0	0	1	1	1	1	0	1	0	0	-	0	0	0	1	1	0	0	1	-	0	1	0	0	1	1	-	0	0	1
S79_1537316	79	-	1	0	1	0	-	0	1	0	1	0	0	0	1	0	0	0	-	-	0	1	1	1	1	0	1	0	0	0	1	0	0	1	0	0	0	1	1	0	1	0	0	1	1	0	0	0	1
S79_1602367	79	0	1	0	1	-	-	0	0	0	1	0	0	0	1	1	0	0	1	0	0	1	0	1	1	0	1	0	0	0	0	0	0	0	0	0	0	1	0	0	1	0	0	1	0	0	0	0	1
S79_1617397	79	0	1	0	1	0	0	0	1	0	1	0	0	0	1	0	0	0	-	0	0	0	1	1	1	0	1	0	0	1	0	0	0	0	1	0	0	1	1	0	1	0	0	1	1	0	0	0	1
S79_1620587	79	0	1	0	1	-	-	0	1	0	1	0	0	0	1	-	0	0	0	0	0	0	1	1	1	0	1	0	0	1	-	0	0	0	1	0	0	1	0	0	1	0	0	1	1	0	0	0	1
S79_1632406	79	0	1	0	1	0	0	0	1	0	0	0	0	0	1	0	0	0	1	0	0	1	1	1	1	0	1	0	0	0	1	0	-	0	0	0	0	1	1	0	1	0	0	1	1	0	0	0	1
S79_1632626	79	0	1	0	1	0	0	0	1	0	1	0	0	0	1	-	0	0	1	0	0	1	1	1	1	0	1	0	0	0	1	0	0	0	1	0	0	1	1	0	1	0	0	1	1	0	0	0	1
S79_1636440	79	0	1	1	1	0	0	0	1	0	1	0	0	0	1	0	0	0	1	0	0	1	1	1	1	0	1	0	0	0	1	0	0	0	0	0	0	1	1	0	1	0	0	1	1	-	0	0	1
	79 Average	0.0125	0.951807	0.0365854	0.963855	0.0151515	0.0147059	0.0240964	0.915663	0.0243902	0.858974	0.0240964	0.0125	0.0365854	0.890244	0.370968	0.0263158	0.0121951	0.740741	0.0365854	0.0240964	0.783133	0.939024	0.963415	0.927711	0.0843373	0.926829	0.0617284	0.0120482	0.658228	0.769231	0.0240964	0.037037	0.746988	0.717949	0.0240964	0.0240964	0.903614	0.7875	0.0240964	0.903614	0.0365854	0	0.939024	0.951807	0.0266667	0.0361446	0.037037	0.879518
S80_60478	80	1	1	0	1	-	0	1	1	1	0	0	1	1	0	-	0	0	-	1	1	1	0	1	0	1	-	0	-	-	1	1	1	0	0	0	1	1	-	1	0	1	-	-	1	-	1	0	0
S80_136660	80	0	0	0	0	0	-	1	0	0	0	1	0	0	1	-	0	0	0	1	0	0	0	1	1	0	1	1	1	0	0	0	0	1	1	1	1	1	1	0	1	0	1	1	0	-	0	0	0
S80_211522	80	0	0	0	0	1	0	1	0	1	1	1	0	0	1	-	0	1	0	1	0	0	0	1	1	0	1	1	1	0	0	0	1	1	1	1	1	1	0	0	1	0	1	1	0	0	0	0	0
	80 Average	0.333333	0.333333	0	0.333333	0.5	0	1	0.333333	0.666667	0.333333	0.666667	0.333333	0.333333	0.666667	#DIV/0!	0	0.333333	0	1	0.333333	0.333333	0	1	0.666667	0.333333	1	0.666667	1	0	0.333333	0.333333	0.666667	0.666667	0.666667	0.666667	1	1	0.5	0.333333	0.666667	0.333333	1	1	0.333333	0	0.333333	0	0
S81_49309	81	0	1	0	1	0	0	0	1	0	1	0	0	1	1	0	0	0	1	1	0	1	1	0	1	1	0	1	0	1	1	0	0	1	1	1	0	1	1	0	1	0	0	1	0	1	0	0	1
S81_49515	81	0	1	0	1	0	0	0	1	0	1	0	0	1	1	1	0	0	1	1	0	0	1	0	1	1	0	1	0	1	1	0	0	1	1	1	0	1	1	0	1	0	0	1	0	1	0	0	1
S81_231681	81	0	1	0	1	0	-	0	1	0	1	0	0	1	0	1	0	0	1	1	0	1	1	0	1	1	0	1	0	0	1	0	0	1	0	1	0	1	1	0	1	0	0	1	0	0	0	0	1
S81_240670	81	0	1	0	1	0	0	0	1	0	1	0	0	0	1	-	-	0	0	1	0	1	1	0	1	0	0	1	0	0	1	0	0	1	1	1	0	0	-	0	0	0	0	1	0	1	0	0	1
S81_273338	81	0	1	0	1	0	0	0	1	0	1	0	0	1	1	1	0	0	1	1	0	1	1	0	1	1	0	1	0	1	1	0	0	1	1	1	0	1	1	0	1	0	0	1	0	1	0	0	1
S81_275748	81	0	1	0	1	0	0	0	1	0	1	0	0	1	1	1	0	0	1	1	0	1	1	0	1	1	0	1	0	1	1	0	0	1	1	1	0	1	1	0	1	0	0	1	0	1	0	0	1
S81_340339	81	-	-	-	-	0	-	0	-	-	1	1	1	-	-	-	-	-	0	-	1	1	-	1	-	-	-	0	1	-	-	-	-	-	-	1	1	1	-	-	-	-	1	0	-	-	-	0	-
S81_583810	81	0	1	0	1	0	0	0	1	0	1	0	0	1	1	0	0	0	1	1	0	1	1	0	1	1	0	1	0	0	1	0	0	1	1	0	0	0	1	0	0	0	0	1	0	0	0	0	1
S81_602269	81	0	1	0	1	-	-	0	1	0	0	0	0	1	0	1	0	0	0	0	0	1	1	0	1	1	0	0	0	-	1	0	0	0	1	1	0	-	-	0	1	0	0	1	0	0	0	0	1
S81_663887	81	0	1	0	1	0	0	0	1	0	1	0	0	1	1	0	-	0	0	1	0	1	1	0	1	1	0	-	1	-	1	0	0	1	1	1	0	1	1	0	1	0	0	1	0	0	0	0	1
S81_664046	81	0	1	0	1	0	0	0	1	0	1	0	0	1	1	1	0	0	1	1	0	1	1	0	1	1	0	1	0	1	1	0	0	1	1	1	0	1	1	0	1	0	0	1	0	1	0	0	1
S81_664599	81	0	1	0	0	-	0	-	1	0	0	0	0	1	1	-	0	0	1	0	0	0	1	0	1	1	0	1	0	0	1	0	0	1	1	1	0	1	1	0	1	0	0	1	0	0	0	0	1
S81_672540	81	0	1	0	1	0	0	0	1	0	1	0	0	1	1	1	0	0	1	1	0	1	1	0	1	1	0	1	0	1	1	0	0	1	1	1	0	1	1	0	1	0	0	1	0	1	0	0	1
S81_672720	81	0	1	0	1	-	-	0	1	0	1	0	0	1	1	-	0	0	1	1	0	1	1	0	1	1	0	0	0	0	0	0	0	1	1	1	0	1	1	0	1	0	0	1	0	0	0	0	1
S81_677253	81	0	1	0	1	0	0	0	1	0	1	0	0	1	1	1	0	0	1	1	0	1	1	0	1	1	0	1	0	1	1	0	0	1	1	1	0	1	1	0	1	0	0	1	0	1	0	0	1
S81_793258	81	0	1	0	1	0	0	0	1	0	1	0	0	1	1	1	0	0	1	1	0	1	1	0	1	1	0	1	0	1	0	0	0	1	1	1	0	1	1	0	1	0	0	1	0	1	0	0	1
S81_811989	81	0	1	0	1	0	-	0	1	-	1	0	0	1	1	-	0	-	0	-	0	1	1	0	1	1	0	1	-	0	-	0	0	0	1	1	0	0	0	0	1	0	0	1	0	1	0	0	1
S81_815216	81	0	1	0	1	0	0	0	1	0	0	0	0	0	1	-	0	0	1	1	0	1	1	0	1	1	0	1	0	1	1	0	0	0	1	1	0	0	1	0	1	0	0	1	0	1	0	0	1
S81_815774	81	0	1	0	1	0	0	0	1	0	1	0	0	1	0	1	0	0	1	1	0	1	1	0	1	1	0	1	0	0	1	0	0	1	0	1	0	1	1	0	1	0	0	1	0	1	0	0	1
S81_815915	81	0	1	0	1	0	0	0	1	0	1	0	0	1	1	-	0	0	0	0	0	1	1	0	1	1	0	1	0	0	1	0	0	1	0	1	0	1	1	0	1	0	0	1	0	0	0	0	0
S81_832169	81	0	1	0	1	0	0	0	1	0	1	0	0	1	1	1	0	0	1	1	0	1	1	0	1	1	0	1	0	1	0	0	0	1	1	1	0	1	1	0	1	0	0	1	0	1	0	0	1
	81 Average	0	1	0	0.95	0	0	0	1	0	0.857143	0.047619	0.047619	0.9	0.85	0.785714	0	0	0.714286	0.842105	0.047619	0.904762	1	0.047619	1	0.95	0	0.85	0.1	0.555556	0.842105	0	0	0.85	0.85	0.952381	0.047619	0.8	0.944444	0	0.9	0	0.047619	0.952381	0	0.65	0	0	0.95
S82_355190	82	0	0	0	1	0	1	1	0	1	0	0	0	1	0	0	1	0	1	1	1	1	1	0	0	1	0	0	0	1	0	1	0	1	1	0	0	1	0	0	0	1	0	0	1	1	0	0	1
S82_650409	82	0	0	0	1	-	0	1	0	1	0	1	0	1	0	-	0	0	1	1	1	1	1	0	0	1	1	0	0	1	0	1	1	1	0	0	0	1	0	1	1	1	0	0	1	1	0	1	0
S82_717545	82	0	0	0	1	-	-	0	0	1	0	1	0	0	0	1	0	0	1	1	1	0	1	0	0	1	1	0	0	1	-	0	0	1	-	0	0	0	0	1	1	0	0	0	1	1	0	0	1
S82_740907	82	0	0	0	1	0	1	0	0	0	0	1	0	1	0	-	1	0	0	1	1	0	1	0	0	1	1	0	0	1	0	1	0	0	0	0	0	1	0	1	1	1	0	0	1	-	0	0	-
S82_741013	82	1	0	0	1	0	-	1	0	0	0	1	-	0	0	0	0	0	0	1	1	0	1	0	0	0	1	0	0	0	0	1	0	1	1	0	0	0	0	1	1	0	0	0	1	1	0	0	1
S82_756306	82	1	0	0	1	1	1	1	0	1	0	1	0	1	0	1	1	0	1	1	1	1	1	0	0	1	1	0	0	1	0	1	1	1	1	0	0	1	0	1	1	1	0	0	1	1	0	1	1
S82_931409	82	1	0	0	1	1	1	1	0	1	0	1	0	1	0	1	1	0	1	1	1	1	1	0	0	1	1	0	0	1	0	1	1	1	1	0	0	1	0	1	1	1	0	0	1	1	0	1	1
S82_1000985	82	1	0	1	1	1	1	1	0	1	0	1	0	1	0	0	1	0	1	1	1	1	1	0	0	1	1	0	0	1	0	1	1	1	1	0	0	1	0	1	1	0	0	0	1	1	1	1	1
S82_1005559	82	1	0	0	1	1	1	1	0	1	0	1	0	1	0	0	1	0	1	1	1	0	1	0	0	1	1	0	0	1	0	1	1	1	1	0	0	1	0	1	1	1	0	0	1	1	0	1	1
S82_1201357	82	1	0	0	1	1	1	1	0	1	0	1	0	1	0	1	1	0	1	1	1	0	1	0	0	1	1	0	0	1	0	1	1	0	1	0	0	1	0	1	1	1	0	0	1	-	0	1	1
S82_1241865	82	1	0	0	1	1	1	1	0	1	0	1	0	1	0	1	1	0	1	1	1	0	1	0	0	1	1	0	0	1	0	1	1	1	1	0	0	1	0	1	1	1	0	0	1	1	0	1	1
S82_1336010	82	1	1	1	1	-	0	1	1	0	1	1	0	1	1	0	0	0	1	0	0	1	0	1	1	1	1	1	1	0	1	1	1	1	1	1	1	0	1	0	1	0	1	1	1	-	0	0	0
	82 Average	0.666667	0.0833333	0.166667	1	0.666667	0.8	0.833333	0.0833333	0.75	0.0833333	0.916667	0	0.833333	0.0833333	0.5	0.666667	0	0.833333	0.916667	0.916667	0.5	0.916667	0.0833333	0.0833333	0.916667	0.916667	0.0833333	0.0833333	0.833333	0.0909091	0.916667	0.666667	0.833333	0.818182	0.0833333	0.0833333	0.75	0.0833333	0.833333	0.916667	0.666667	0.0833333	0.0833333	1	1	0.0833333	0.583333	0.818182
S84_28093	84	1	0	0	1	0	0	0	1	1	0	0	0	0	0	0	1	0	0	1	0	0	1	0	1	1	1	1	0	0	0	0	0	1	1	1	0	1	1	1	1	0	0	0	1	1	0	0	0
S84_53201	84	1	0	0	1	0	0	0	1	1	0	0	0	0	0	1	1	0	0	1	0	1	1	0	1	1	1	1	0	0	1	0	0	1	1	1	0	1	1	1	1	0	0	0	1	1	0	0	0
S84_58458	84	1	0	0	1	0	0	0	1	1	0	0	0	0	0	0	0	0	0	0	0	1	1	0	1	1	0	1	0	0	1	0	0	1	1	1	0	1	1	1	1	0	0	0	1	0	0	0	0
S84_60510	84	1	0	0	1	-	0	0	1	1	0	0	0	0	0	0	1	0	0	1	0	0	1	0	1	1	1	1	0	0	1	0	0	1	1	1	0	1	1	1	1	0	0	0	1	1	0	0	0
S84_60626	84	1	0	0	1	0	0	0	1	1	0	0	0	0	0	1	1	0	0	1	0	1	1	0	1	1	1	1	0	0	1	0	0	1	1	1	0	1	1	1	1	0	0	0	1	1	0	0	0
S84_62567	84	1	0	0	1	0	0	0	1	1	0	0	0	0	0	0	1	0	0	1	0	1	1	0	1	1	1	1	0	0	1	0	0	1	1	1	0	1	1	1	1	0	0	0	1	1	0	0	0
S84_62693	84	1	0	0	1	0	0	0	1	1	0	0	0	0	0	1	1	0	0	1	0	1	1	0	1	1	0	1	0	0	1	0	0	1	1	0	0	1	1	1	1	0	0	0	1	1	0	0	0
S84_70624	84	1	0	0	1	0	0	0	1	1	0	0	0	0	0	0	1	0	0	1	0	1	1	0	1	1	1	1	0	0	1	0	0	1	1	1	0	1	1	1	1	0	0	0	1	-	0	0	0
S84_74030	84	1	0	0	1	0	0	0	1	1	0	0	0	0	0	0	1	0	0	1	0	1	1	0	1	1	1	1	0	0	1	0	0	0	1	1	0	1	1	1	1	0	0	0	1	1	0	0	0
S84_74761	84	1	0	0	1	0	0	0	1	1	0	0	0	0	0	0	1	0	0	1	0	0	1	0	1	1	1	1	0	0	1	0	0	1	1	1	0	1	1	1	1	0	0	0	1	1	0	0	0
S84_82664	84	1	0	0	1	0	0	0	1	1	0	0	0	0	0	1	1	0	0	1	0	0	1	0	1	1	1	1	0	0	1	0	0	1	1	1	0	1	1	1	1	0	0	0	1	1	0	0	0
S84_82770	84	1	0	0	1	0	0	0	1	1	0	0	0	0	0	0	1	0	0	1	0	0	1	0	1	1	1	1	0	0	0	0	0	1	1	1	0	1	1	1	1	0	0	0	1	1	0	0	0
S84_118711	84	1	0	0	1	0	0	0	1	1	0	0	0	0	0	0	1	0	0	1	0	0	1	0	1	1	1	1	0	0	1	0	0	0	1	1	0	1	1	1	1	0	0	0	1	-	0	0	0
S84_122496	84	-	0	0	1	0	0	0	1	1	0	0	0	0	0	0	1	0	0	1	0	0	1	0	1	1	1	1	0	0	0	0	0	1	1	1	0	1	1	1	1	0	0	0	1	1	0	0	0
S84_153733	84	1	0	0	1	0	0	0	1	1	0	0	0	0	0	1	1	0	0	1	0	0	1	0	1	1	1	1	0	0	1	0	0	1	1	1	0	1	1	1	1	0	0	0	1	1	0	0	0
S84_164096	84	1	0	0	1	0	0	0	1	1	0	0	0	0	0	0	1	0	0	1	0	0	1	0	1	1	1	1	0	0	1	0	0	1	1	1	0	1	1	1	1	0	0	0	1	1	0	0	0
S84_178393	84	1	0	0	1	0	0	0	1	1	0	0	0	0	0	1	1	0	0	1	0	1	1	0	1	1	1	1	0	0	1	0	0	1	1	1	0	1	1	1	1	0	0	0	1	1	0	0	0
S84_179543	84	1	0	0	1	0	0	0	1	1	0	0	0	0	0	0	1	0	0	1	0	0	1	0	1	1	1	1	0	0	1	0	0	1	1	1	0	1	1	1	1	0	0	0	1	1	0	0	0
S84_180276	84	1	0	0	1	0	0	0	1	1	0	0	0	0	0	0	1	0	0	1	0	1	1	0	1	1	1	1	0	0	1	0	0	1	1	1	0	1	1	1	1	0	0	0	1	1	0	0	0
S84_186148	84	1	0	0	1	-	0	0	1	1	0	0	0	0	0	1	1	0	0	1	0	1	1	0	1	1	1	1	0	0	1	0	0	1	0	1	0	1	1	1	1	0	0	0	1	1	0	0	0
S84_186664	84	1	0	0	1	0	0	0	1	0	0	0	0	0	0	1	1	0	0	1	0	1	1	0	1	1	1	1	0	0	1	0	0	0	1	1	0	1	1	1	1	0	0	0	1	1	0	0	0
S84_187800	84	-	0	0	1	0	0	0	1	1	0	0	0	0	0	1	1	0	0	1	0	1	1	0	1	1	1	1	0	0	1	0	0	1	1	1	0	1	1	1	1	0	0	0	1	1	0	0	0
S84_187959	84	1	0	0	1	0	0	0	1	1	0	0	0	0	0	0	1	0	0	1	0	0	1	0	1	1	1	1	0	0	1	0	0	1	1	1	0	1	1	1	1	0	0	0	1	1	0	0	0
S84_188219	84	1	0	0	1	0	0	0	1	1	0	0	0	0	0	1	1	0	0	1	0	1	1	0	1	1	1	1	0	0	1	0	0	1	1	1	0	1	1	1	1	0	0	0	1	1	0	0	0
S84_191243	84	1	0	0	1	0	0	0	1	1	0	0	0	0	0	0	1	0	0	1	0	0	1	0	1	1	1	1	0	0	1	0	0	1	1	1	0	1	1	1	1	0	0	0	1	0	0	0	0
S84_191420	84	-	0	0	1	0	-	0	1	1	0	0	0	0	0	-	1	0	0	1	0	0	1	0	1	1	1	1	0	0	1	0	0	1	0	1	0	1	1	1	1	0	0	0	1	1	0	0	0
S84_199885	84	1	0	0	1	0	0	0	1	1	0	0	0	0	0	0	1	0	0	1	0	0	1	0	1	1	1	1	0	0	1	0	0	1	1	1	0	1	1	1	1	0	0	0	1	1	0	0	0
S84_215307	84	1	0	1	1	0	0	0	1	1	0	0	0	0	0	1	1	0	0	1	0	0	1	0	1	1	1	1	0	0	1	0	0	1	1	1	0	1	1	1	1	0	0	0	1	1	1	0	0
S84_231947	84	0	0	0	1	0	0	0	1	1	0	0	0	0	0	0	1	0	0	1	0	1	1	0	1	1	1	1	0	0	1	0	0	1	0	1	0	1	1	1	1	0	0	0	1	1	0	0	0
S84_255817	84	1	0	0	1	0	-	0	1	1	0	0	0	0	0	1	1	0	0	1	0	0	1	0	1	1	1	1	1	0	0	0	0	1	1	1	0	1	1	1	0	0	0	0	1	1	0	0	0
S84_272477	84	1	0	0	1	0	0	0	1	1	0	0	0	0	0	0	1	0	0	1	0	0	1	0	1	1	1	1	0	0	1	0	0	1	1	1	0	1	1	1	1	0	0	0	0	1	0	0	0
S84_291289	84	1	0	0	1	0	0	0	1	1	0	0	0	0	0	1	1	0	0	1	0	1	1	0	1	1	1	1	0	0	0	0	0	1	1	1	0	1	1	1	1	0	0	0	0	1	0	0	0
S84_299708	84	1	0	0	1	0	0	0	1	1	0	0	0	0	0	1	1	0	0	1	0	1	1	0	1	1	1	1	0	0	1	0	0	1	1	1	0	1	1	1	1	0	0	0	0	1	0	0	0
S84_318231	84	1	0	1	1	0	0	0	1	1	0	0	0	0	0	0	1	0	0	1	0	1	1	0	1	1	1	1	0	0	1	0	0	1	1	1	0	1	1	1	1	0	0	0	0	1	1	0	0
S84_338026	84	1	0	0	1	0	0	0	1	1	0	0	0	0	0	1	1	0	0	1	0	1	1	0	1	1	1	1	0	0	1	0	0	1	1	1	0	1	1	1	1	0	0	0	0	1	0	0	0
S84_338128	84	1	0	0	1	0	0	0	1	1	0	0	0	0	0	0	1	0	0	1	0	0	1	0	1	1	1	1	0	0	1	0	0	1	1	1	0	1	1	1	1	0	0	0	0	1	1	0	0
S84_347911	84	1	0	0	1	0	0	0	1	1	0	0	0	0	0	1	0	0	-	1	0	0	1	0	1	1	1	1	0	0	1	0	0	1	1	1	0	1	1	1	1	0	0	0	0	1	0	0	0
S84_362811	84	1	0	0	1	0	0	0	1	1	0	0	0	0	0	1	1	0	0	1	0	0	1	0	1	1	1	1	0	0	1	0	0	1	1	1	0	1	1	1	1	0	0	0	0	1	0	0	0
S84_362911	84	0	0	0	1	0	0	0	1	1	0	0	0	0	0	0	1	0	0	1	0	0	1	0	1	1	0	1	0	0	1	0	0	1	1	0	0	1	1	1	1	0	0	0	0	1	0	0	0
S84_367188	84	1	0	0	1	0	0	0	1	1	0	0	0	0	0	1	1	0	0	0	0	1	1	0	1	1	1	1	0	0	1	0	0	1	1	1	0	1	1	1	1	0	0	0	0	1	0	0	0
S84_375579	84	1	0	0	1	0	0	0	1	1	0	0	0	0	0	1	1	0	0	1	0	0	1	0	1	1	1	1	0	0	1	0	0	1	1	1	0	1	1	1	1	0	0	0	0	1	0	0	0
S84_381355	84	1	0	0	1	0	0	0	1	0	0	0	0	0	0	-	1	0	0	1	0	1	1	0	1	1	1	1	0	0	1	0	0	1	1	1	0	1	1	0	1	0	0	0	0	0	0	0	0
S84_383281	84	1	0	0	1	0	0	0	1	1	0	0	0	0	0	0	1	0	0	1	0	0	1	0	1	1	1	1	0	0	1	0	0	1	1	1	0	1	1	1	1	0	0	0	0	1	0	0	0
S84_385535	84	1	0	0	1	0	0	0	1	1	0	0	0	0	0	1	1	0	0	1	0	0	1	0	1	1	1	1	0	0	1	0	0	1	1	1	0	1	1	1	1	0	0	0	0	1	0	0	0
S84_411330	84	1	0	0	1	0	0	0	1	1	0	0	0	0	0	1	1	0	0	1	0	0	1	0	1	1	1	1	0	0	1	0	0	1	1	1	0	1	1	1	1	0	0	0	0	1	0	0	0
S84_418080	84	1	0	0	1	0	0	0	1	1	0	0	0	0	0	1	1	0	0	1	0	1	1	0	1	1	1	1	0	0	1	0	0	1	1	1	0	1	1	1	1	0	0	0	0	1	0	0	0
S84_418212	84	1	0	0	1	0	0	0	1	1	0	0	0	0	0	1	1	0	0	1	0	0	1	0	1	1	1	1	0	0	1	0	0	1	1	1	0	1	1	1	1	0	0	0	0	1	0	0	0
S84_437200	84	1	0	0	1	0	0	0	1	1	0	0	0	0	0	0	1	0	0	1	0	0	1	0	1	1	1	1	0	0	1	0	0	1	1	1	0	1	1	1	1	0	0	0	0	1	0	0	0
S84_451087	84	1	0	0	1	0	0	0	1	1	0	0	0	0	0	0	1	0	0	1	0	1	1	0	1	1	1	1	1	0	1	0	0	1	1	1	0	1	1	1	1	0	0	0	0	0	0	0	0
S84_485273	84	1	0	0	1	0	0	0	1	1	0	0	0	0	0	1	1	0	0	1	0	1	1	0	1	1	1	1	0	0	1	0	0	1	1	1	0	1	1	1	1	0	0	0	0	1	0	0	0
S84_488638	84	1	0	0	1	0	0	0	1	1	0	0	0	0	0	1	1	0	0	1	0	0	1	0	1	1	1	1	0	0	1	0	0	1	1	1	0	1	1	1	1	0	0	0	0	1	0	0	0
S84_504508	84	1	0	0	1	0	0	0	1	1	0	0	0	0	0	1	1	0	0	1	0	1	1	0	1	1	1	1	0	0	1	0	0	0	1	1	0	0	1	1	1	0	0	0	0	1	0	0	0
S84_523958	84	1	0	0	1	0	0	0	1	1	0	0	0	0	0	1	1	0	0	1	0	1	1	0	1	1	0	1	0	0	1	0	0	1	1	0	0	1	1	1	1	0	0	0	0	1	0	0	0
S84_540046	84	0	0	0	1	0	0	0	1	1	0	0	0	0	0	0	1	0	0	1	0	0	1	0	1	1	0	1	0	0	1	0	0	1	1	0	0	1	1	1	1	0	0	0	0	1	0	0	0
S84_540163	84	0	0	0	1	0	0	0	1	1	0	0	0	0	0	0	1	0	0	1	0	0	1	0	1	1	1	1	0	0	1	0	0	0	0	1	0	1	1	1	1	0	0	0	0	1	0	0	0
S84_547040	84	1	0	0	1	0	0	0	1	1	0	0	0	0	0	0	1	0	0	1	0	1	1	0	1	1	1	1	0	0	1	0	0	1	1	1	0	1	1	1	1	0	0	0	0	0	0	0	0
S84_548887	84	0	0	0	1	0	0	0	1	1	0	0	0	0	0	0	1	0	0	1	0	0	1	0	1	1	1	1	0	0	1	0	0	1	1	1	0	1	1	1	1	0	0	0	0	1	0	0	0
S84_563224	84	1	0	0	1	0	0	0	1	1	0	0	0	0	0	1	1	0	0	1	0	0	1	0	1	1	1	1	0	0	1	0	0	1	1	1	0	1	1	1	1	0	0	0	0	1	0	0	0
S84_603818	84	1	0	0	1	0	0	0	1	1	0	0	0	0	0	0	1	0	0	1	0	1	1	0	1	1	1	1	0	0	1	0	0	1	1	1	0	1	1	1	1	0	0	0	0	1	0	0	0
S84_607751	84	1	0	0	1	0	0	0	1	1	0	0	0	0	0	0	1	0	0	1	0	0	1	0	1	1	1	1	0	0	1	0	0	1	1	1	0	1	1	1	1	0	0	0	0	1	1	0	0
S84_642847	84	1	0	1	1	0	0	0	1	0	0	0	0	0	0	0	1	0	0	1	0	1	1	0	1	1	1	1	0	0	1	0	0	1	1	1	0	1	1	1	1	0	0	0	0	1	1	0	0
S84_644863	84	1	0	1	1	0	0	0	1	1	0	0	0	0	0	0	1	0	0	1	0	0	1	0	1	1	1	1	0	0	1	0	0	1	1	1	0	1	1	1	1	0	0	0	0	1	1	0	0
S84_693606	84	1	0	0	1	0	0	0	1	1	0	0	0	0	0	0	1	0	0	1	0	0	1	0	1	1	1	1	0	0	0	0	0	1	1	1	0	1	1	1	1	0	0	0	0	0	0	0	0
S84_703657	84	1	0	0	1	0	0	0	1	1	0	0	0	0	0	0	1	0	0	1	0	0	1	0	1	1	1	1	0	0	1	0	0	1	1	1	0	1	1	1	1	0	0	0	0	1	0	0	0
S84_704275	84	1	0	0	1	0	0	0	1	1	0	0	0	0	0	1	1	0	0	1	0	0	1	0	1	1	0	1	0	0	1	0	0	1	1	0	0	1	1	1	1	0	0	0	0	1	0	0	0
S84_722942	84	1	0	0	1	0	0	0	1	1	0	0	0	0	0	0	1	0	0	1	0	1	1	0	0	1	1	1	0	0	1	0	0	1	1	1	0	1	1	1	1	0	0	0	0	1	0	0	0
S84_738698	84	0	0	0	1	0	-	0	1	1	0	0	0	0	0	0	1	0	0	1	0	1	1	0	1	1	1	1	0	0	1	0	0	1	1	1	0	1	1	1	1	0	0	0	0	1	0	0	0
S84_741334	84	1	0	0	1	0	0	0	1	1	0	0	0	0	0	0	1	0	0	1	0	0	1	0	1	1	1	1	0	0	1	0	0	1	1	1	0	1	1	1	1	0	0	0	0	1	0	0	0
S84_762558	84	1	0	0	1	0	-	0	1	1	0	0	0	0	0	-	1	0	0	1	0	1	1	0	1	1	1	1	0	0	0	0	0	1	1	1	0	1	0	1	1	0	0	0	0	0	0	0	0
S84_804927	84	1	0	0	1	0	0	0	1	1	0	0	0	0	0	0	1	0	0	1	0	0	1	0	1	1	1	1	0	0	1	0	0	1	1	1	0	1	1	1	1	0	0	0	0	0	0	0	0
S84_806445	84	0	0	0	1	0	-	0	1	1	0	0	0	0	0	-	1	0	0	0	0	0	1	0	1	1	1	1	0	0	1	0	0	1	0	1	0	1	1	1	1	0	0	0	0	1	0	0	0
S84_820419	84	1	0	0	1	0	0	0	1	1	0	0	0	0	0	1	1	0	0	1	0	1	1	0	1	1	1	1	0	0	1	0	0	1	1	1	0	1	1	1	1	0	0	0	0	1	0	0	0
S84_847142	84	1	0	0	1	0	0	0	1	1	0	0	0	0	0	1	1	0	0	1	0	0	1	0	1	1	1	1	0	0	1	0	0	1	1	1	0	1	1	1	1	0	0	0	0	1	0	0	0
S84_856496	84	1	0	0	1	0	0	0	1	1	0	0	0	0	0	1	1	0	0	1	0	0	1	0	1	1	1	1	0	0	1	0	0	1	1	1	0	1	1	1	1	0	0	0	0	1	0	0	0
S84_857815	84	0	0	0	1	0	0	0	1	1	0	0	0	0	0	-	1	0	0	1	0	1	1	0	1	1	1	1	0	0	1	0	0	1	1	1	0	1	1	1	1	0	0	0	0	1	0	0	0
S84_866136	84	0	0	0	1	0	0	0	1	0	0	0	0	0	0	0	1	0	0	1	0	0	1	0	1	1	1	1	0	0	1	0	0	1	1	1	0	1	0	1	1	0	0	0	0	1	0	0	0
S84_868531	84	1	0	0	1	0	0	0	1	1	0	0	0	0	0	0	1	0	0	1	0	1	1	0	1	1	1	1	0	0	1	0	0	1	1	1	0	1	1	1	1	0	0	0	0	1	0	0	0
S84_870197	84	0	0	0	1	0	0	0	1	1	0	0	0	0	0	1	1	0	0	1	0	0	1	0	1	1	1	1	0	0	1	0	0	1	0	1	0	1	1	1	1	0	0	0	0	0	0	0	0
S84_875965	84	1	0	0	1	0	0	0	1	1	0	0	0	0	0	1	1	0	0	1	0	1	1	0	1	1	1	1	0	0	1	0	0	1	1	1	0	1	1	1	1	0	0	0	0	1	0	0	0
S84_880832	84	1	0	0	1	0	0	0	1	1	0	0	0	0	0	1	1	0	0	1	0	1	1	0	1	1	1	1	0	0	1	0	0	1	1	1	0	1	1	1	1	0	0	0	0	1	0	0	0
S84_881416	84	1	0	0	1	0	0	0	1	1	0	0	0	0	0	1	1	0	0	1	0	0	1	0	1	1	1	1	0	0	1	0	0	1	1	1	0	1	1	1	1	0	0	0	0	1	0	0	0
S84_893020	84	1	0	0	1	0	0	0	1	1	0	0	0	0	0	0	1	0	0	1	0	0	1	0	1	1	1	1	0	0	1	0	0	1	1	1	0	1	1	1	1	0	0	0	0	1	0	0	0
S84_925863	84	1	0	0	1	0	0	0	1	1	0	0	0	0	0	0	1	0	0	1	0	1	1	0	1	1	1	1	0	0	1	0	0	1	1	1	0	1	1	1	1	0	0	0	0	1	0	0	0
S84_983495	84	0	0	0	1	0	0	0	1	1	0	0	0	0	0	1	1	0	0	1	0	1	1	0	1	1	0	1	0	-	1	0	0	0	1	0	0	1	1	1	1	0	0	0	0	0	0	0	0
S84_1002080	84	1	0	0	1	0	0	0	1	0	0	0	0	0	0	0	-	0	0	1	0	1	1	0	1	1	1	1	0	0	0	0	0	1	1	1	0	1	1	1	1	0	0	0	0	1	0	0	0
S84_1037463	84	1	0	0	1	0	0	0	1	1	0	0	0	0	0	1	1	0	0	1	0	1	1	0	1	1	0	1	0	0	1	0	0	1	1	0	0	1	1	1	1	0	0	0	0	1	0	0	0
S84_1065309	84	1	0	0	1	0	0	0	1	1	0	0	0	0	0	1	1	0	0	1	0	1	1	0	1	1	1	1	0	0	1	0	0	1	1	1	0	1	1	1	1	0	0	0	0	1	0	0	0
S84_1095084	84	-	1	0	1	1	-	1	0	0	1	1	1	0	1	0	-	1	1	0	1	1	1	0	1	1	1	0	1	1	1	0	1	0	0	0	1	0	0	1	0	1	1	1	1	1	1	1	1
S84_1158200	84	0	0	0	1	0	0	0	1	1	0	0	0	0	0	1	0	0	0	1	0	1	1	0	1	1	1	1	0	0	1	0	0	1	1	1	0	1	1	1	1	0	0	0	0	1	0	0	0
S84_1173239	84	1	0	0	1	0	0	0	1	1	0	0	0	0	0	1	0	0	0	1	0	1	1	0	1	1	1	1	0	0	1	0	0	1	1	1	0	1	1	1	1	0	0	0	0	1	0	0	0
S84_1190896	84	0	0	0	1	0	0	0	1	1	0	0	0	0	0	1	0	0	0	1	0	0	1	0	1	1	1	1	0	0	1	0	0	1	1	1	0	1	1	1	1	0	0	0	0	1	-	0	0
S84_1215188	84	1	0	0	1	0	0	0	1	1	0	0	0	0	0	-	0	0	0	1	0	0	1	0	1	1	1	1	0	0	1	0	0	1	1	1	0	1	1	1	1	0	0	0	0	1	0	0	0
S84_1215877	84	1	0	0	1	0	0	0	1	1	0	0	0	0	0	1	0	0	0	1	0	0	1	0	1	1	1	1	0	0	1	0	0	1	1	1	0	1	1	1	1	0	0	0	0	1	0	0	0
S84_1215987	84	1	0	0	1	0	0	0	1	1	0	0	0	0	0	1	0	0	0	1	0	1	1	0	1	1	1	1	0	0	1	0	0	1	1	1	0	1	1	1	1	0	0	0	0	1	0	0	0
S84_1216269	84	1	0	0	1	0	0	0	1	1	0	0	0	0	0	0	0	0	0	1	0	0	0	0	1	1	1	1	0	0	1	0	0	1	1	1	0	1	1	1	1	0	0	0	0	1	0	0	0
S84_1219545	84	1	0	0	1	0	0	0	1	1	0	0	0	0	0	1	0	0	0	1	0	1	1	0	1	1	1	1	0	0	1	0	0	1	1	1	0	1	1	1	1	0	0	0	0	1	0	0	0
S84_1238679	84	1	0	0	1	0	0	0	1	1	0	0	0	0	0	1	0	0	0	1	0	0	1	0	0	1	1	1	0	0	1	0	0	1	1	1	0	1	1	1	1	0	0	0	0	1	0	0	0
S84_1240809	84	0	0	0	1	0	0	0	1	1	0	0	0	0	0	1	0	0	0	1	0	0	1	0	1	1	1	0	0	0	1	0	0	1	1	1	0	1	1	1	1	0	0	0	0	1	0	0	0
S84_1258360	84	0	0	0	1	0	0	0	1	1	0	0	0	0	0	0	0	0	0	1	0	0	1	0	1	1	1	1	0	0	1	0	0	1	1	1	0	1	1	1	1	0	0	0	0	1	0	0	0
S84_1262802	84	1	0	0	1	0	0	0	1	1	0	0	0	0	0	1	0	0	0	1	0	0	1	0	1	1	1	1	0	0	1	0	0	1	1	1	0	1	1	1	1	0	0	0	0	1	0	0	0
S84_1312447	84	0	1	0	1	0	-	1	1	1	1	1	1	0	1	0	0	1	1	0	1	0	1	1	1	1	0	1	1	1	1	1	1	0	0	1	1	1	1	1	0	1	1	1	1	0	1	1	0
S84_1332802	84	1	0	0	1	0	0	0	1	1	0	0	0	0	0	0	0	0	0	1	0	1	1	0	1	1	1	1	0	0	1	0	0	1	1	1	0	1	1	1	1	0	0	0	0	0	0	0	0
S84_1338357	84	1	0	0	1	0	0	0	1	1	0	0	0	0	0	1	0	0	0	1	0	0	1	0	1	1	1	1	0	0	1	0	0	1	1	1	0	1	1	1	1	0	0	0	0	1	0	0	0
S84_1345690	84	1	0	0	1	0	0	0	1	1	0	0	0	0	0	1	0	0	0	0	0	0	1	0	1	1	1	1	0	0	1	0	0	1	1	1	0	1	1	1	1	0	0	0	0	1	0	0	0
S84_1436058	84	1	0	0	1	0	-	0	1	1	0	0	0	0	0	0	0	0	0	1	0	0	1	0	1	1	1	1	0	0	1	0	0	1	1	1	0	1	1	1	1	0	0	0	0	1	0	0	0
S84_1438170	84	1	0	0	1	0	0	0	1	1	0	0	0	0	0	0	0	0	0	0	0	1	1	0	1	1	1	1	0	0	1	0	0	1	1	1	0	1	1	1	1	0	0	0	0	1	0	0	0
S84_1457573	84	1	0	0	1	0	0	0	1	1	0	0	0	0	0	0	0	0	0	1	0	1	1	0	1	1	1	1	0	0	1	0	0	1	1	1	0	1	1	1	1	0	0	0	0	1	0	0	0
S84_1466036	84	1	0	0	1	0	0	0	1	1	0	0	0	0	0	1	0	0	0	1	0	1	1	0	1	1	1	1	0	0	1	0	0	1	1	1	0	1	1	1	1	0	0	0	0	1	0	0	0
S84_1480849	84	1	0	0	1	-	0	0	1	1	0	0	0	0	0	0	0	0	0	1	0	1	1	0	1	1	1	1	0	-	1	0	0	1	1	1	0	1	0	1	1	0	0	0	0	0	0	0	0
S84_1504889	84	1	0	0	1	0	0	0	1	1	0	0	0	0	0	1	0	0	0	1	0	1	1	0	1	1	1	1	0	0	1	0	0	1	1	1	0	1	1	1	1	0	0	0	0	1	0	0	0
S84_1533690	84	1	0	0	1	0	0	0	1	1	0	0	0	0	0	-	0	0	0	0	0	1	1	0	1	1	1	1	0	0	1	0	0	1	1	1	0	1	1	1	1	0	0	0	0	0	0	0	0
S84_1545830	84	1	0	0	1	0	0	0	1	1	0	0	0	0	0	1	0	0	0	1	0	1	1	0	1	1	1	1	0	0	1	0	0	1	1	1	0	1	1	1	1	0	0	0	0	1	0	0	0
S84_1643184	84	0	1	0	0	-	0	1	0	0	0	0	-	0	1	-	-	0	0	1	0	0	1	0	0	1	1	0	0	0	0	1	0	0	-	0	1	0	0	1	0	0	1	1	0	1	1	0	1
S84_1662357	84	1	0	0	1	0	0	0	1	1	0	0	0	0	0	1	0	0	0	1	0	1	1	0	1	1	0	1	0	0	1	0	0	1	1	1	0	1	1	1	1	0	0	0	0	1	0	0	0
S84_1722095	84	1	0	0	1	0	0	0	1	1	0	0	0	0	0	0	0	0	0	1	0	0	1	0	1	1	0	0	0	0	1	0	0	1	1	1	0	1	1	1	1	0	0	0	0	1	0	0	0
S84_1752583	84	1	0	0	1	0	0	0	1	1	0	0	0	0	0	1	0	0	0	1	0	1	1	0	1	1	0	1	0	0	1	0	0	1	1	1	0	1	1	1	1	0	0	0	0	1	0	0	0
S84_1783631	84	1	0	0	1	0	0	0	1	1	0	0	0	0	0	1	0	0	0	1	0	1	1	0	1	1	0	1	0	0	1	0	0	1	1	1	0	1	1	1	1	0	0	0	0	1	0	0	0
S84_1803172	84	1	0	0	1	0	0	0	1	1	0	0	0	0	0	0	0	0	0	1	0	0	1	0	1	1	0	1	0	0	1	0	0	1	1	0	0	1	1	1	1	0	0	0	0	1	0	0	0
S84_1859280	84	1	0	0	1	0	0	0	1	1	0	0	0	0	0	0	0	0	0	1	0	1	1	0	1	1	0	1	0	-	0	0	0	1	1	1	0	1	1	1	1	0	0	0	0	0	0	0	0
S84_1874436	84	0	0	0	1	0	0	0	1	1	0	0	0	0	0	1	0	0	0	1	0	1	1	0	1	1	0	1	0	0	1	0	0	1	1	1	0	1	1	1	1	0	0	0	0	1	0	0	0
S84_1888308	84	1	0	0	1	0	0	0	1	1	0	0	0	0	0	1	0	0	0	1	0	1	1	0	1	1	0	1	0	0	1	0	0	1	1	1	0	1	1	1	1	0	0	0	0	1	0	0	0
S84_1906947	84	1	0	0	1	0	0	0	1	1	0	0	0	0	0	1	0	0	0	1	0	1	1	0	1	1	0	1	0	0	1	0	0	1	1	1	0	1	1	1	1	0	0	0	0	1	0	0	0
S84_1908554	84	1	0	0	1	0	0	0	1	1	0	0	0	0	0	0	0	0	0	1	0	1	1	0	1	1	0	1	0	0	1	0	0	1	1	1	0	0	0	1	1	0	0	0	0	1	0	0	0
S84_1938760	84	1	0	0	1	0	0	0	1	1	0	0	0	0	0	0	0	0	0	1	0	1	1	0	1	1	0	1	0	0	1	0	0	1	1	1	0	1	1	1	1	0	0	0	0	1	0	0	0
S84_1991735	84	1	0	0	1	0	0	0	1	1	0	0	0	0	0	0	0	0	0	1	0	0	1	0	1	1	0	1	0	0	1	0	0	1	1	1	0	1	1	1	1	0	0	0	0	1	0	0	0
S84_1991900	84	1	0	0	1	0	0	0	1	1	0	0	0	0	0	0	0	0	0	1	0	1	1	0	1	1	0	1	0	0	1	0	0	1	1	1	0	1	1	1	1	0	0	0	0	1	0	0	0
S84_2208712	84	1	0	0	1	-	0	0	1	0	0	0	0	0	0	-	0	0	0	1	0	0	1	0	1	1	0	1	0	0	1	0	0	1	1	1	0	1	1	1	1	0	0	0	0	0	0	0	0
S84_2284548	84	1	0	0	1	0	0	0	1	1	0	0	0	0	0	1	0	0	0	1	0	1	1	0	1	1	0	1	0	1	1	0	0	1	1	1	0	1	1	1	1	0	0	0	0	1	0	0	0
S84_2312157	84	1	0	0	1	0	0	0	1	1	0	0	0	0	0	0	0	0	0	1	0	1	1	0	1	1	0	1	0	1	1	0	0	1	1	1	0	1	1	1	1	0	0	0	0	1	0	0	0
S84_2315030	84	1	0	0	1	0	0	0	1	1	0	0	0	0	0	1	0	0	0	1	0	0	1	0	1	1	0	1	0	1	1	0	0	1	1	1	0	1	1	1	1	0	0	0	0	0	0	0	0
S84_2327012	84	1	0	0	1	0	0	-	1	1	0	0	0	0	0	0	0	0	0	1	0	0	1	0	1	1	0	1	0	1	0	0	0	1	1	1	0	1	1	1	1	0	0	0	0	0	0	0	0
S84_2334244	84	1	0	0	1	0	-	0	1	1	0	0	0	0	0	1	0	0	0	1	0	1	1	0	1	1	0	1	0	1	1	0	0	1	1	1	0	1	1	1	1	0	0	0	0	1	0	0	0
S84_2353534	84	1	0	0	1	0	0	0	1	1	0	0	0	0	0	0	0	0	0	1	0	0	1	0	0	1	0	1	0	1	1	0	0	1	0	1	0	1	1	1	1	0	0	0	0	1	0	0	0
S84_2401417	84	1	0	0	1	0	0	0	1	1	0	0	0	0	0	1	0	0	0	1	0	1	1	0	1	1	0	1	0	1	1	0	0	1	1	1	0	1	1	1	1	0	0	0	0	1	0	0	0
S84_2408731	84	1	0	0	1	0	0	0	1	1	0	0	0	0	0	0	0	0	0	1	0	1	1	0	1	1	0	1	0	1	1	0	0	1	1	1	0	1	1	1	1	0	0	0	0	1	0	0	0
S84_2417831	84	0	0	0	1	0	0	0	1	1	0	0	0	0	0	-	0	0	0	1	0	0	1	0	1	1	0	1	0	1	0	0	0	1	1	1	0	1	1	1	1	0	0	0	0	1	0	0	0
S84_2418655	84	1	0	0	1	0	0	0	1	1	0	0	0	0	0	1	0	0	0	1	0	1	1	0	1	1	0	1	0	1	1	0	0	1	1	1	0	1	1	1	1	0	0	0	0	1	0	0	0
S84_2443640	84	1	0	0	1	-	0	0	1	1	0	0	0	0	0	0	0	0	0	1	0	0	1	0	1	1	0	1	0	1	0	0	0	1	1	1	0	0	1	1	1	0	0	0	0	0	0	0	0
S84_2449542	84	0	0	0	1	0	0	0	1	0	0	0	0	0	0	0	0	0	0	1	0	0	1	0	1	1	0	1	0	1	1	0	0	1	1	1	0	1	1	1	1	0	0	0	0	1	0	0	0
S84_2455473	84	1	0	0	1	0	0	0	1	1	0	0	0	0	0	-	0	0	0	1	0	1	1	0	1	1	0	1	0	1	1	0	0	1	1	1	0	1	1	1	1	0	0	0	0	1	0	0	0
S84_2459651	84	1	0	0	1	0	0	0	1	1	0	0	0	0	0	1	0	0	0	1	0	0	1	0	1	1	0	1	0	1	1	0	0	1	1	1	0	1	1	1	1	0	0	0	0	1	0	0	0
S84_2486015	84	1	0	0	1	0	0	0	1	0	0	0	0	0	0	1	0	0	0	1	0	0	1	0	1	1	0	1	0	1	1	0	0	1	1	1	0	1	1	1	1	0	0	0	0	1	0	0	0
S84_2493729	84	1	0	0	1	0	0	0	1	0	0	0	0	0	0	1	0	0	0	1	0	0	1	0	1	1	0	1	0	-	1	0	0	1	1	1	0	1	1	1	1	0	0	0	0	1	0	0	0
S84_2504344	84	0	0	0	1	0	0	0	1	0	0	0	0	0	0	-	0	0	0	1	0	0	1	0	1	1	0	1	0	1	1	0	0	1	1	1	0	1	1	1	1	0	0	0	0	1	0	0	0
S84_2504475	84	1	0	0	1	-	0	0	1	0	0	0	0	0	0	-	0	0	0	1	0	0	1	0	1	1	0	1	0	1	1	0	0	0	0	1	0	1	1	1	1	0	0	0	0	1	0	0	0
S84_2510081	84	1	0	0	1	0	-	0	1	0	0	0	0	0	0	0	0	0	0	1	0	0	1	0	0	1	0	1	0	1	1	0	0	1	1	1	0	1	1	1	1	0	0	0	0	0	0	0	0
S84_2510322	84	1	0	0	1	0	0	0	1	0	0	0	0	0	0	0	0	0	0	1	0	1	1	0	1	1	0	1	0	1	1	0	0	1	-	0	0	1	1	1	1	0	0	0	0	1	0	0	0
S84_2516400	84	1	0	0	1	0	0	0	1	0	0	0	0	0	0	1	0	0	0	1	0	0	1	0	1	1	0	1	0	1	1	0	0	1	1	1	0	1	1	1	1	0	0	0	0	1	0	0	0
S84_2548615	84	1	0	0	1	0	0	0	1	0	0	0	0	0	0	1	0	0	0	1	0	0	1	0	1	1	0	1	0	1	1	0	0	1	1	1	0	1	1	1	1	0	0	0	0	1	0	0	0
S84_2548744	84	1	0	0	1	0	0	0	1	0	0	0	0	0	0	1	0	0	0	1	0	1	1	0	1	1	0	1	0	1	1	0	0	1	1	1	0	1	1	1	1	0	0	0	0	1	0	0	0
S84_2565167	84	1	0	0	1	0	0	0	1	0	0	0	0	0	0	0	0	0	0	1	0	0	1	0	1	1	0	1	0	0	1	0	0	1	1	1	0	0	1	1	1	0	0	0	0	1	0	0	0
S84_2565542	84	1	0	0	1	0	0	0	1	0	0	0	0	0	0	0	0	0	0	1	0	1	1	0	1	1	0	1	0	1	1	0	0	1	1	1	0	1	1	1	1	0	0	0	0	1	0	0	0
S84_2587855	84	0	0	0	1	-	-	0	1	0	0	0	0	0	0	-	0	0	0	1	0	1	1	0	1	1	0	1	0	0	1	0	0	1	1	1	0	1	1	1	1	0	0	0	0	0	0	0	0
S84_2614285	84	1	0	0	1	0	0	0	1	0	0	0	0	0	0	-	0	0	0	1	0	1	1	0	1	1	0	0	0	1	1	0	0	1	1	1	0	1	1	1	1	0	0	0	0	1	0	0	0
S84_2618527	84	1	0	0	1	-	-	0	1	0	0	0	0	0	0	1	0	0	0	1	0	1	1	0	1	1	0	1	0	0	0	0	0	1	1	1	0	1	0	1	1	0	0	0	0	0	0	0	0
S84_2620604	84	1	0	0	1	0	0	0	1	0	0	0	0	0	0	1	0	0	0	1	0	0	1	0	1	1	0	1	0	1	1	0	0	1	1	1	0	1	1	1	1	0	0	0	0	1	0	0	0
S84_2634593	84	1	0	0	1	-	0	0	1	0	0	0	0	0	0	0	0	0	0	1	0	1	1	0	1	1	0	1	0	1	1	0	0	0	1	1	0	1	1	1	1	0	0	0	0	1	0	0	0
S84_2641018	84	1	0	0	1	0	0	0	1	0	0	0	0	0	0	0	0	0	0	1	0	1	1	0	1	1	0	1	0	1	1	0	0	1	1	1	0	1	1	1	1	0	0	0	0	1	0	0	0
S84_2662371	84	1	0	0	1	0	0	0	1	0	0	0	0	0	0	1	0	0	0	1	0	1	1	0	1	1	0	1	0	1	1	0	0	1	1	1	0	1	1	1	1	0	0	0	0	1	0	0	0
S84_2668094	84	1	0	0	1	0	0	0	1	0	0	0	0	0	0	-	0	0	0	1	0	1	1	0	1	1	0	1	0	1	1	0	0	1	1	1	0	1	1	1	1	0	0	0	0	1	0	0	0
S84_2672430	84	1	0	0	1	-	0	0	1	0	0	0	0	0	0	1	0	0	0	1	0	0	1	0	1	1	0	1	0	1	1	0	0	1	1	1	0	1	1	1	1	0	0	0	0	0	0	0	0
S84_2682058	84	1	0	0	1	0	0	0	1	0	0	0	0	0	0	1	0	0	0	1	0	1	1	0	1	1	0	1	0	1	1	0	0	1	1	1	0	1	1	1	1	0	0	0	0	1	0	0	1
S84_2684136	84	1	0	0	1	0	0	0	1	0	0	0	0	0	0	1	0	0	0	1	0	1	1	0	1	1	0	1	0	1	1	0	0	1	1	1	0	1	1	1	1	0	0	0	0	1	0	0	1
S84_2697056	84	1	0	0	1	0	0	0	1	0	0	0	0	0	0	1	0	0	0	1	0	1	1	0	1	1	0	1	0	1	1	0	0	1	1	1	0	1	1	1	1	0	0	0	0	1	0	0	1
S84_2714035	84	1	0	0	1	0	0	0	0	0	0	0	0	0	0	0	0	0	0	1	0	0	1	0	1	1	0	1	0	0	1	0	0	1	1	1	0	1	0	1	1	0	0	0	0	1	0	0	1
S84_2727349	84	1	0	0	1	0	0	0	1	0	0	0	0	0	0	-	0	0	0	1	0	1	1	0	1	1	0	1	0	1	1	0	0	1	1	1	0	1	1	1	1	0	0	0	0	1	0	0	1
S84_2754747	84	1	0	0	1	-	-	0	1	0	0	0	0	0	0	1	0	0	0	1	0	1	0	0	1	1	0	1	0	1	1	0	0	1	1	1	0	1	1	1	1	0	0	0	0	0	0	0	1
S84_2796954	84	0	0	1	1	0	0	0	1	0	0	0	0	0	0	0	0	0	0	1	0	0	1	0	1	1	0	1	0	0	1	0	0	1	1	1	0	1	1	1	1	0	0	0	0	0	0	0	1
S84_2797071	84	1	0	1	1	0	0	0	1	0	0	0	0	0	0	0	0	0	0	1	0	1	1	0	1	1	0	1	0	1	1	0	0	1	1	0	0	1	1	1	1	0	0	0	0	1	0	0	1
S84_2798876	84	1	0	1	1	0	0	0	1	0	0	0	0	0	0	0	0	0	0	0	0	1	1	0	1	1	0	1	0	1	1	0	0	1	1	1	0	1	1	1	1	0	0	0	0	1	0	0	1
S84_2820510	84	1	0	0	1	0	0	0	1	0	0	0	0	0	0	0	0	0	0	1	0	0	1	0	1	1	0	1	0	1	1	0	0	1	1	1	0	1	1	1	1	0	0	0	0	1	0	0	1
S84_2904245	84	0	0	0	0	1	1	1	0	1	0	1	0	0	0	1	0	1	0	1	0	1	0	1	1	0	0	1	1	0	0	1	1	1	1	1	1	1	1	0	1	0	1	0	0	0	0	0	0
S84_2944462	84	0	0	0	0	0	0	1	0	0	0	1	0	0	0	-	0	1	0	1	0	1	0	1	1	0	0	1	1	0	0	1	1	1	1	1	1	1	1	0	1	0	1	0	0	-	0	0	0
S84_3071618	84	0	0	0	0	0	-	1	0	1	0	1	0	0	0	0	0	0	0	1	0	0	0	1	1	0	0	1	1	0	0	1	1	1	0	1	1	1	1	0	1	0	1	0	0	0	0	0	0
S84_3072382	84	0	0	0	0	1	0	1	0	1	0	1	0	0	0	1	0	1	0	1	0	1	0	1	1	0	0	1	1	0	0	1	1	1	1	1	1	0	0	0	1	0	1	0	0	0	0	0	0
S84_3097019	84	0	0	0	0	1	1	1	0	1	0	1	0	0	0	1	0	1	0	1	0	1	0	1	1	0	0	1	1	0	0	1	1	1	1	1	1	1	1	0	1	0	1	0	0	0	1	0	0
S84_3116710	84	0	0	0	0	1	1	1	0	1	0	1	0	0	0	0	0	1	0	1	0	1	0	1	1	0	0	1	1	0	0	1	1	1	1	1	1	1	1	0	1	0	1	0	0	0	0	0	0
S84_3137733	84	0	0	0	0	1	1	1	0	0	0	1	0	0	0	1	0	1	0	1	0	1	0	1	1	0	0	1	1	0	0	1	1	1	1	1	1	1	1	0	1	0	1	0	0	0	0	0	0
S84_3142568	84	0	0	0	0	1	1	1	0	1	0	1	0	0	0	1	0	1	0	1	0	1	0	1	1	0	0	1	1	0	0	1	1	1	1	1	1	1	1	0	1	0	1	0	0	0	0	0	0
S84_3143943	84	0	0	0	0	-	-	1	0	0	0	0	0	0	0	0	0	1	0	1	0	1	0	1	1	0	0	1	1	0	0	1	1	1	1	1	1	1	1	0	1	0	1	0	0	0	1	0	0
S84_3145482	84	0	0	0	0	1	1	1	0	0	0	1	0	0	0	1	0	1	0	1	0	1	0	1	0	0	0	1	1	0	0	1	0	1	0	1	1	0	-	0	1	0	1	0	0	0	0	0	0
S84_3145674	84	0	0	0	0	0	0	1	0	1	0	1	0	0	0	1	0	1	0	1	0	1	0	1	1	0	0	1	0	0	0	1	0	1	1	1	1	1	1	0	1	0	1	0	0	0	0	0	0
S84_3165411	84	0	0	0	0	1	1	1	0	1	0	1	0	0	0	0	0	1	0	1	0	1	0	1	1	0	0	1	1	0	0	1	1	1	1	1	1	1	1	0	1	0	1	0	0	0	0	0	0
S84_3202762	84	0	0	0	0	1	1	1	0	1	0	1	0	0	0	1	0	1	0	1	0	1	0	1	1	0	0	1	1	0	0	1	1	1	0	1	1	1	1	0	0	0	1	0	0	0	0	0	0
S84_3285835	84	0	0	0	0	1	1	1	0	1	0	1	0	0	0	1	0	1	0	1	0	1	0	1	1	0	0	1	1	0	0	1	1	1	1	1	1	1	1	0	1	0	1	0	0	0	0	0	0
S84_3322930	84	0	0	0	0	1	1	1	0	1	0	1	0	0	0	1	0	1	0	1	0	1	0	1	1	0	0	1	1	0	0	0	1	1	1	1	1	1	1	0	1	0	1	0	0	0	0	0	0
S84_3326723	84	0	0	0	0	1	-	1	0	1	0	1	0	0	0	1	0	1	0	1	0	1	0	1	1	0	0	1	1	0	0	0	1	0	1	1	1	1	1	0	1	0	1	0	0	0	0	0	0
S84_3352099	84	0	0	0	0	1	1	1	0	1	0	1	0	0	0	1	0	1	0	1	0	0	0	1	1	0	0	1	1	0	0	0	1	0	1	1	1	1	1	0	1	0	1	0	0	0	0	0	0
S84_3356433	84	0	0	0	0	1	1	1	0	1	0	1	0	0	0	1	0	1	0	1	0	1	0	1	1	0	0	1	1	0	0	0	1	1	1	1	1	1	1	0	1	0	1	0	0	0	0	0	0
	84 Average	0.778378	0.015873	0.037037	0.899471	0.0852273	0.0693642	0.111702	0.888889	0.772487	0.010582	0.100529	0.0106383	0	0.015873	0.532164	0.451613	0.100529	0.0106383	0.952381	0.010582	0.550265	0.89418	0.100529	0.968254	0.904762	0.550265	0.973545	0.111111	0.216216	0.830688	0.0846561	0.0952381	0.931217	0.930481	0.936508	0.111111	0.957672	0.952128	0.899471	0.973545	0.010582	0.111111	0.015873	0.169312	0.774194	0.0585106	0.010582	0.0634921
S86_169271	86	0	0	0	0	1	0	1	0	0	1	1	1	0	0	-	0	0	1	0	1	1	0	1	0	0	0	1	1	0	0	0	0	0	0	1	1	1	0	0	0	0	1	1	0	0	0	0	0
S86_169373	86	0	0	0	0	-	0	1	0	0	1	1	1	0	0	0	0	0	0	0	1	1	0	1	0	0	0	1	1	0	0	0	0	0	0	1	1	1	0	0	0	0	1	1	0	0	0	1	0
S86_186194	86	0	0	0	0	1	0	1	0	0	1	1	1	0	0	0	0	0	0	0	1	1	0	1	0	0	0	1	1	0	0	0	0	0	0	1	1	1	0	0	0	0	1	1	0	0	0	1	0
S86_207262	86	0	0	0	0	-	0	1	0	0	0	1	1	0	0	0	0	0	1	0	1	1	0	1	0	0	0	1	1	0	0	0	0	0	0	1	1	1	0	0	0	0	1	1	0	0	0	1	0
S86_207441	86	0	0	0	0	1	0	1	0	0	1	1	1	0	0	-	0	0	1	0	1	1	0	1	0	0	0	1	1	0	0	0	0	0	0	1	1	1	0	0	0	0	1	-	0	0	0	0	0
S86_232147	86	0	0	0	0	1	0	1	0	0	1	1	1	0	0	0	0	0	1	0	1	1	0	1	0	0	0	1	1	0	0	0	0	0	0	1	1	1	0	0	0	0	1	1	0	0	0	1	0
S86_266008	86	0	0	0	0	0	-	1	0	0	1	1	0	0	0	-	0	0	0	0	1	1	0	1	0	0	0	0	1	0	0	0	0	-	0	0	1	1	0	0	0	-	1	1	0	0	0	1	0
S86_280063	86	0	0	0	0	0	0	1	0	0	1	1	1	0	0	0	0	0	1	0	1	1	0	1	0	0	0	1	1	0	0	0	0	0	0	1	1	0	0	0	0	0	1	1	0	0	0	1	0
S86_280983	86	0	0	0	0	0	0	0	0	0	1	1	1	0	0	0	0	0	1	0	1	1	0	1	0	0	0	1	1	0	0	0	0	0	0	1	1	1	0	0	0	0	1	1	0	0	0	1	0
S86_289313	86	0	0	0	0	1	0	1	0	0	0	1	0	0	0	0	0	0	1	0	1	1	0	1	0	0	0	1	1	0	0	0	0	0	0	1	1	1	0	0	0	0	1	1	0	0	0	0	0
S86_327864	86	0	0	0	0	0	0	1	0	0	0	1	1	0	0	0	0	0	0	0	1	1	0	1	0	0	0	0	1	0	0	0	0	-	0	1	1	1	-	0	0	0	1	1	0	0	0	1	1
S86_333038	86	0	0	0	0	0	0	1	0	0	0	1	1	0	0	-	0	0	1	0	1	1	0	1	0	0	0	1	1	0	0	0	0	0	0	1	1	0	0	0	0	0	1	1	0	0	0	1	0
S86_333244	86	0	0	0	0	0	0	1	0	0	1	1	1	0	0	0	0	0	1	0	1	1	0	1	0	0	0	1	1	0	0	0	0	0	0	1	1	1	0	0	0	0	1	1	0	0	0	0	1
S86_364029	86	1	0	0	1	0	-	1	0	1	0	1	0	1	0	0	1	0	1	1	1	0	1	0	0	1	1	0	0	1	0	1	1	1	1	0	0	1	0	1	1	1	0	0	1	1	0	1	1
S86_463417	86	0	0	0	0	0	0	1	0	0	1	1	1	0	0	0	0	0	1	0	1	1	0	1	0	0	0	1	1	0	0	0	0	0	0	1	1	1	0	0	0	0	1	0	0	0	0	0	1
S86_506634	86	0	0	0	0	1	0	1	0	0	1	1	1	0	0	0	0	0	1	0	1	1	0	1	0	0	0	1	1	0	0	0	0	0	0	1	1	1	0	0	0	0	1	1	0	0	0	1	1
S86_554750	86	0	0	0	0	1	-	1	0	0	1	1	1	0	0	-	0	0	1	0	1	1	0	1	0	0	0	1	1	0	0	0	0	0	0	1	1	1	0	0	0	0	1	1	0	0	0	1	1
S86_593554	86	0	0	0	0	0	0	1	0	0	1	1	1	0	0	0	0	0	1	0	1	1	0	1	0	0	0	1	1	0	0	0	0	0	0	1	1	1	0	0	0	0	1	1	0	0	0	1	1
S86_593677	86	0	0	0	0	1	0	1	0	0	1	1	1	0	0	-	0	0	0	0	1	1	0	1	0	0	0	1	1	0	0	0	0	0	0	1	1	1	-	0	0	0	0	1	0	0	0	1	1
S86_651936	86	0	0	0	0	0	0	1	0	0	0	1	1	0	0	0	0	0	1	0	1	0	0	1	0	0	0	1	1	0	0	0	0	0	0	1	1	1	0	0	0	0	1	1	0	0	0	0	1
S86_652046	86	0	0	0	0	1	0	1	0	0	1	1	1	0	0	0	0	0	1	0	1	1	0	1	0	0	0	1	0	0	0	0	0	0	0	1	1	1	0	0	0	0	1	1	0	0	0	1	1
S86_656716	86	0	0	0	0	-	0	0	0	0	1	1	1	0	-	-	0	0	1	0	0	0	0	1	0	0	0	1	0	-	0	0	0	-	0	0	1	1	0	0	0	0	1	1	0	-	0	1	1
S86_716558	86	0	0	0	0	1	-	1	0	0	1	1	1	0	0	-	0	0	1	0	1	1	0	1	0	0	0	1	0	0	0	0	0	0	0	1	1	1	0	0	0	0	1	1	0	0	0	0	1
S86_740329	86	0	0	0	0	1	0	1	0	0	1	1	1	0	0	0	0	0	1	0	1	1	0	1	0	0	0	1	1	0	0	0	0	0	0	1	1	1	0	0	0	0	1	1	0	0	0	1	1
S86_777439	86	0	0	0	0	1	0	0	0	0	0	1	1	0	0	-	0	0	0	0	1	1	0	1	0	0	0	1	-	0	0	0	0	0	0	1	1	1	0	0	0	0	0	1	0	0	0	1	1
S86_792869	86	0	0	0	0	0	0	1	0	0	0	1	1	0	0	0	0	0	0	0	0	1	0	1	0	0	0	1	1	0	0	0	0	0	0	1	1	1	0	0	0	0	1	1	0	0	0	0	1
S86_792982	86	0	0	0	0	0	0	1	0	0	1	1	1	0	0	0	0	0	0	0	1	1	0	1	0	0	0	0	1	0	-	0	0	0	0	1	1	1	0	0	0	0	1	1	0	0	0	1	1
S86_795678	86	-	0	0	0	0	0	1	0	0	0	1	0	0	0	0	0	0	1	-	0	0	0	1	0	0	0	1	1	0	0	0	0	0	-	1	1	1	0	0	0	0	1	0	0	0	0	0	1
S86_909950	86	0	0	0	0	1	0	1	0	0	1	1	1	0	0	0	0	0	1	0	1	1	0	1	0	0	0	1	1	0	0	0	0	0	0	1	1	1	0	0	0	0	1	1	0	0	0	1	1
S86_988335	86	0	0	0	0	1	0	1	0	0	1	1	1	0	0	0	0	0	1	0	1	1	0	1	0	0	0	1	1	0	0	0	0	0	0	1	1	1	0	0	0	0	1	1	0	0	0	1	1
S86_1049223	86	0	0	0	0	0	0	1	0	0	1	1	1	0	0	0	0	0	1	0	1	1	0	1	0	0	0	1	1	0	0	0	0	0	0	1	1	1	0	0	0	0	1	1	0	0	0	0	1
S86_1049346	86	0	0	0	0	1	0	1	0	0	1	1	1	0	0	-	0	0	1	0	1	1	0	1	0	0	0	1	1	0	0	0	0	0	0	1	1	1	0	0	0	0	1	1	0	0	0	1	1
S86_1085601	86	0	0	0	0	0	0	1	0	0	1	1	1	0	0	0	0	0	0	0	1	1	0	1	0	0	0	1	1	0	0	0	0	0	0	1	1	1	0	0	0	0	1	0	0	0	0	0	1
S86_1085754	86	-	0	0	0	0	0	1	0	0	1	1	1	0	0	0	0	0	1	0	1	1	0	1	0	0	0	1	0	0	0	0	0	0	0	1	1	1	0	0	0	0	1	1	0	0	0	1	1
S86_1100701	86	0	0	0	0	0	0	1	0	0	-	1	1	0	0	0	0	0	1	0	1	1	0	1	0	0	0	1	1	0	0	0	0	0	-	1	1	1	0	0	0	0	0	0	0	0	0	0	0
S86_1103444	86	0	0	0	0	0	0	0	0	0	1	1	1	0	0	0	0	0	1	0	1	1	0	1	0	0	0	1	1	0	0	0	0	0	0	1	1	1	0	0	0	0	1	1	0	0	0	1	1
S86_1116574	86	0	0	0	0	1	0	1	0	0	1	1	1	0	0	0	0	0	1	0	1	1	0	1	0	0	0	1	1	0	0	0	0	0	0	1	1	1	0	0	0	0	1	1	0	0	0	1	1
S86_1265524	86	0	0	0	0	1	0	1	0	0	0	1	1	0	0	0	0	0	0	0	1	1	0	1	0	0	0	0	1	0	0	0	0	0	0	1	1	0	0	0	0	0	1	1	0	0	0	1	1
S86_1266447	86	0	0	0	0	1	0	1	0	0	0	1	1	0	0	0	0	0	1	0	1	1	0	1	0	0	0	1	1	0	0	0	0	0	0	1	1	1	0	0	0	0	1	1	0	0	0	1	1
S86_1282568	86	0	0	0	0	1	0	1	0	0	1	1	1	0	0	0	0	0	1	0	1	1	0	1	0	0	0	1	1	0	0	0	0	0	0	1	1	1	0	0	0	0	1	1	0	0	0	1	1
S86_1307205	86	0	0	0	0	1	0	1	0	0	1	1	1	0	0	0	0	0	1	0	1	1	0	1	0	0	0	1	1	0	0	0	0	0	0	1	1	1	0	0	0	0	1	1	0	0	0	1	1
	86 Average	0.025641	0	0	0.0243902	0.526316	0	0.902439	0	0.0243902	0.725	1	0.902439	0.0243902	0	0	0.0243902	0	0.756098	0.025	0.926829	0.902439	0.0243902	0.97561	0	0.0243902	0.0243902	0.878049	0.875	0.025	0	0.0243902	0.0243902	0.0263158	0.025641	0.926829	0.97561	0.926829	0	0.0243902	0.0243902	0.025	0.902439	0.875	0.0243902	0.025	0	0.707317	0.707317
S89_80926	89	0	0	0	0	0	0	1	0	0	1	1	1	0	0	1	0	0	1	0	1	1	0	1	0	0	0	1	1	0	0	0	0	0	0	1	1	1	0	0	0	0	1	0	0	0	0	0	0
S89_385466	89	0	0	0	0	0	0	1	0	0	1	1	1	0	0	-	0	0	1	0	0	1	0	1	0	0	0	1	1	0	0	0	0	0	0	1	1	1	0	0	0	0	1	1	0	-	0	1	0
	89 Average	0	0	0	0	0	0	1	0	0	1	1	1	0	0	1	0	0	1	0	0.5	1	0	1	0	0	0	1	1	0	0	0	0	0	0	1	1	1	0	0	0	0	1	0.5	0	0	0	0.5	0
S91_112256	91	0	0	0	0	1	0	1	0	1	1	1	0	0	1	0	0	1	0	1	0	0	0	1	1	0	1	1	1	0	0	0	1	1	1	1	1	1	1	0	1	0	1	1	0	0	0	0	0
S91_113537	91	0	0	0	0	-	0	1	0	1	1	1	0	0	1	-	0	1	0	1	0	0	0	1	1	0	1	1	1	0	0	0	1	1	0	1	1	1	1	0	1	0	1	1	0	0	0	0	0
S91_113991	91	0	0	0	0	1	0	1	0	1	1	1	0	0	1	0	0	1	0	1	0	1	0	1	1	0	1	1	1	0	0	0	1	1	1	1	1	1	1	0	1	0	1	0	0	0	0	0	0
S91_114093	91	0	0	0	0	1	0	1	0	1	1	1	0	0	1	0	0	1	0	1	0	0	0	1	1	0	1	1	1	0	0	0	1	1	1	1	1	1	1	0	1	0	1	1	0	0	0	0	0
S91_227311	91	0	0	0	0	1	0	1	0	1	1	1	0	0	1	1	0	1	0	1	0	0	0	1	1	0	1	1	1	0	0	0	1	1	1	1	1	1	1	0	1	0	1	1	0	0	0	0	0
S91_231390	91	0	0	0	0	0	-	1	1	0	1	1	0	0	1	0	-	1	0	1	0	1	0	1	1	0	1	1	1	0	0	0	1	1	-	1	1	1	-	0	1	0	1	0	0	0	0	0	0
S91_365249	91	0	0	0	0	0	0	1	0	1	1	1	0	0	1	1	0	1	0	1	0	0	0	1	1	0	1	1	1	0	0	0	1	1	1	1	1	1	1	0	1	0	1	1	0	0	0	0	0
S91_366267	91	0	0	0	0	0	0	1	0	1	0	1	0	0	1	0	0	1	0	1	0	1	0	1	1	0	1	1	1	0	0	0	1	1	1	1	1	1	0	0	1	0	1	1	0	0	0	-	0
S91_395734	91	0	0	0	0	1	0	1	0	1	1	1	0	0	1	1	0	1	0	1	0	1	0	1	1	0	1	1	1	0	0	0	1	1	1	1	1	1	1	0	1	0	1	1	0	0	0	0	0
S91_401521	91	0	0	0	0	1	0	1	0	1	1	1	0	0	1	1	0	1	0	1	0	0	0	1	1	0	1	1	1	0	0	0	0	1	1	1	1	1	1	0	1	0	1	1	0	0	0	0	0
	91 Average	0	0	0	0	0.666667	0	1	0.1	0.9	0.9	1	0	0	1	0.444444	0	1	0	1	0	0.4	0	1	1	0	1	1	1	0	0	0	0.9	1	0.888889	1	1	1	0.888889	0	1	0	1	0.8	0	0	0	0	0
S92_123021	92	0	0	0	1	1	1	0	0	0	0	1	0	1	1	0	1	0	0	1	1	0	0	0	0	1	0	1	1	1	1	0	1	0	0	1	1	0	0	0	0	1	1	0	1	1	1	1	0
S92_128946	92	0	0	0	1	-	0	0	0	0	0	1	0	0	1	0	1	0	0	1	1	0	0	0	0	1	1	0	1	0	1	0	0	0	0	1	1	0	0	0	0	-	0	0	1	-	1	0	0
S92_129308	92	0	0	0	1	0	1	0	0	0	0	1	0	1	1	0	1	0	0	1	1	1	0	0	0	0	0	1	1	1	1	0	1	0	0	1	1	0	0	0	0	1	1	0	1	0	1	0	0
S92_129651	92	0	0	0	1	1	1	0	0	0	0	1	0	1	1	0	1	0	0	1	1	1	0	0	0	1	0	1	1	1	1	0	1	0	0	1	1	0	0	0	0	1	1	0	1	1	1	1	0
S92_135595	92	0	0	0	1	0	-	0	0	0	0	1	0	1	1	0	0	0	0	1	1	0	0	0	0	1	0	1	1	1	1	0	1	0	-	1	1	0	0	0	0	1	1	0	1	1	1	1	0
S92_135778	92	-	0	0	1	1	0	0	0	0	0	1	0	0	1	0	1	0	0	1	1	1	0	0	0	1	0	1	1	1	1	0	1	0	0	1	1	0	0	0	0	1	1	0	1	1	1	1	0
S92_147690	92	0	0	0	1	1	1	0	0	0	0	1	0	1	0	0	1	0	0	1	1	1	0	0	0	1	0	1	1	1	1	0	1	0	0	1	1	0	0	0	0	1	1	0	1	1	1	1	0
	92 Average	0	0	0	1	0.666667	0.666667	0	0	0	0	1	0	0.714286	0.857143	0	0.857143	0	0	1	1	0.571429	0	0	0	0.857143	0.142857	0.857143	1	0.857143	1	0	0.857143	0	0	1	1	0	0	0	0	1	0.857143	0	1	0.833333	1	0.714286	0
S93_45238	93	0	1	0	0	0	0	1	1	0	1	1	1	0	1	-	0	0	0	1	1	1	0	0	1	0	0	0	0	1	1	0	1	0	1	0	0	1	0	0	0	0	0	1	1	0	0	0	0
S93_49022	93	0	1	0	0	0	0	1	1	0	1	1	1	1	1	1	0	0	1	1	1	1	0	0	1	0	0	0	0	1	1	0	1	0	1	1	0	1	0	0	0	0	0	1	1	0	0	0	0
S93_151742	93	0	1	0	0	0	0	1	1	0	1	1	1	1	1	1	0	0	1	1	1	1	0	0	1	0	0	0	0	1	0	0	1	0	0	1	0	1	0	0	0	0	0	1	1	0	0	0	0
	93 Average	0	1	0	0	0	0	1	1	0	1	1	1	0.666667	1	1	0	0	0.666667	1	1	1	0	0	1	0	0	0	0	1	0.666667	0	1	0	0.666667	0.666667	0	1	0	0	0	0	0	1	1	0	0	0	0
S94_27362	94	0	0	0	0	0	0	1	0	1	1	1	0	1	0	-	0	0	1	0	1	1	0	1	0	0	0	1	1	0	0	0	0	0	0	1	1	1	0	0	0	0	1	0	1	0	0	0	0
S94_129596	94	0	1	0	0	0	1	1	1	0	0	0	0	1	1	1	1	0	0	1	0	1	0	0	0	0	0	1	0	1	1	1	0	1	0	0	0	1	1	0	0	0	0	0	0	1	0	0	0
	94 Average	0	0.5	0	0	0	0.5	1	0.5	0.5	0.5	0.5	0	1	0.5	1	0.5	0	0.5	0.5	0.5	1	0	0.5	0	0	0	1	0.5	0.5	0.5	0.5	0	0.5	0	0.5	0.5	1	0.5	0	0	0	0.5	0	0.5	0.5	0	0	0
S95_49495	95	0	0	0	0	1	0	1	0	0	0	1	0	0	0	-	0	0	1	0	0	1	0	1	0	0	1	1	1	0	1	0	0	0	0	1	0	1	1	1	1	0	0	0	0	0	0	0	0
S95_117723	95	1	0	0	1	1	0	1	1	1	0	1	0	1	0	0	0	0	1	0	0	1	0	1	1	0	1	0	1	0	0	0	0	1	0	1	0	1	1	1	1	0	0	0	0	0	0	0	0
S95_119828	95	0	0	0	1	0	0	1	1	1	0	1	0	1	0	-	0	0	0	0	0	0	0	1	1	0	1	1	1	0	0	0	0	1	0	1	0	0	1	1	1	0	0	0	0	0	0	0	0
S95_261540	95	0	0	0	0	1	0	1	0	1	0	1	0	1	-	-	0	0	1	-	0	0	1	0	0	1	1	0	0	0	0	1	1	1	0	0	0	1	0	0	1	1	0	0	1	-	0	1	1
S95_271820	95	1	0	0	1	1	0	1	1	1	0	1	0	1	0	1	0	0	1	0	0	1	0	1	1	0	1	1	1	0	1	0	0	1	0	1	0	1	1	1	1	0	0	0	0	0	0	0	0
S95_342585	95	1	0	0	1	-	0	1	1	0	0	1	0	1	0	0	0	0	-	0	0	0	0	1	1	0	1	1	1	0	-	0	0	1	0	1	0	1	0	1	1	0	0	0	0	0	0	0	0
S95_391399	95	1	0	0	1	1	0	1	1	1	0	1	0	1	0	1	0	0	1	0	0	1	0	1	1	0	1	0	1	0	0	0	0	1	0	1	0	1	1	1	1	0	0	0	0	0	0	0	0
	95 Average	0.571429	0	0	0.714286	0.833333	0	1	0.714286	0.714286	0	1	0	0.857143	0	0.5	0	0	0.833333	0	0	0.571429	0.142857	0.857143	0.714286	0.142857	1	0.571429	0.857143	0	0.333333	0.142857	0.142857	0.857143	0	0.857143	0	0.857143	0.714286	0.857143	1	0.142857	0	0	0.142857	0	0	0.142857	0.142857
S96_27465	96	0	1	0	1	0	0	0	0	0	1	0	0	1	1	0	0	0	1	1	0	1	1	0	0	1	0	1	0	1	1	0	0	1	1	0	0	1	1	0	1	0	0	1	0	0	0	0	1
S96_64952	96	0	1	0	1	0	0	0	1	0	1	0	0	1	1	0	0	0	1	1	0	1	1	0	1	1	0	1	0	1	1	0	0	1	1	1	0	1	0	0	1	0	0	1	0	1	0	0	1
S96_80433	96	0	1	0	1	0	0	0	1	0	1	0	0	1	1	1	0	0	1	1	0	1	1	0	1	1	0	1	0	1	1	0	0	1	1	1	0	1	1	0	1	0	0	1	0	1	0	0	1
S96_120284	96	0	1	0	1	0	0	0	1	0	1	0	0	1	0	-	-	0	1	1	0	1	1	0	0	1	0	1	0	0	1	0	0	1	0	0	0	1	1	0	1	0	0	1	0	0	0	0	1
S96_127311	96	0	1	0	1	0	-	0	1	0	1	0	0	1	1	0	0	0	1	1	0	1	1	0	1	1	0	1	0	1	0	0	0	1	1	1	0	1	1	0	1	0	0	1	0	1	0	0	0
S96_220468	96	0	1	0	1	0	-	0	0	0	-	0	-	1	1	-	0	0	0	-	0	1	1	0	1	1	0	0	0	1	1	1	-	0	1	1	0	1	1	0	1	0	0	1	0	-	0	0	1
S96_222085	96	0	1	0	1	0	0	0	1	0	1	0	0	1	1	0	0	0	1	1	0	1	1	0	1	1	0	1	0	0	0	0	0	1	-	1	0	1	1	0	1	0	0	1	0	0	0	0	1
S96_230645	96	0	1	0	1	0	0	0	1	0	1	0	0	1	1	0	0	0	1	1	0	1	1	0	1	0	0	1	0	1	0	0	0	1	1	1	0	1	1	0	1	0	0	1	0	1	0	0	1
S96_297866	96	0	1	0	1	0	0	0	1	0	1	0	0	1	1	0	0	0	1	1	0	0	1	0	1	1	0	1	1	1	1	0	0	1	1	1	0	1	1	0	1	0	0	1	0	0	0	0	1
S96_305209	96	0	1	0	1	0	0	0	1	0	0	0	0	1	1	1	0	0	1	1	0	1	1	0	1	1	0	1	0	1	1	0	0	1	1	1	0	1	1	0	1	0	0	1	0	1	0	0	1
S96_307840	96	0	1	0	1	0	0	0	1	0	1	0	0	1	0	-	0	0	1	1	0	1	1	0	0	0	0	1	0	0	1	0	0	1	0	1	0	1	0	0	1	0	0	1	0	1	0	0	1
S96_307949	96	0	1	0	1	-	0	0	1	0	1	0	0	1	1	-	0	0	1	1	0	1	1	0	1	1	0	1	0	0	1	0	0	1	1	1	0	1	0	0	0	0	0	1	0	1	0	0	1
S96_338940	96	0	1	0	1	0	-	-	1	0	1	0	0	0	1	-	0	0	1	1	0	1	1	0	1	1	0	0	0	0	0	0	0	1	1	1	0	1	1	0	1	0	0	1	0	1	0	0	1
S96_357683	96	0	1	0	1	0	0	0	1	0	1	0	0	1	1	-	0	0	1	0	0	1	1	0	0	1	0	0	0	1	0	0	0	1	1	1	0	1	1	0	1	0	0	1	0	1	0	0	1
S96_375979	96	0	1	0	1	0	0	0	1	0	1	0	0	1	1	-	0	0	-	1	0	0	1	0	1	1	0	1	0	0	1	0	0	0	1	1	0	1	1	0	1	0	0	1	0	0	0	0	0
S96_376123	96	0	1	0	1	-	-	0	1	0	1	0	0	1	0	0	0	0	1	1	0	1	1	0	1	1	0	1	0	0	1	0	0	1	1	1	0	1	1	0	1	0	0	1	0	0	0	0	1
S96_503520	96	0	0	0	1	1	1	0	0	0	0	1	0	1	1	0	1	0	0	1	0	0	0	0	0	1	0	1	1	1	1	0	1	0	0	1	1	0	0	0	0	1	1	0	1	1	1	1	0
S96_517613	96	0	1	0	1	0	0	0	1	0	0	0	0	1	1	0	0	0	1	0	0	1	1	0	1	1	0	1	0	1	1	0	0	1	1	1	0	1	1	0	1	0	0	1	0	1	0	0	1
S96_537647	96	0	1	0	1	0	0	0	1	0	1	0	0	1	1	-	0	0	1	1	0	1	1	0	1	1	0	1	0	1	0	0	0	1	1	1	0	1	1	0	1	0	0	1	0	1	0	0	1
S96_540621	96	0	0	0	1	0	0	0	1	0	0	0	0	1	0	-	0	0	1	-	0	1	1	0	1	1	0	1	0	0	0	0	0	0	1	1	0	1	0	0	1	0	0	0	0	1	0	0	1
S96_540739	96	0	1	0	1	0	0	0	1	0	1	0	0	1	1	0	0	0	0	1	0	1	1	0	1	0	0	0	0	1	0	0	0	1	1	1	0	1	1	0	1	0	0	1	0	1	0	0	1
S96_557193	96	0	1	0	1	0	-	0	1	0	1	0	0	1	1	0	0	0	1	1	0	0	1	0	1	1	0	1	0	1	1	0	0	1	0	1	0	1	1	0	1	0	0	1	0	1	0	0	1
S96_557296	96	0	1	0	1	-	0	0	1	0	-	0	0	1	1	-	0	0	1	1	0	0	1	0	1	1	0	1	0	0	1	0	0	1	1	1	0	1	1	0	1	0	0	1	0	1	0	0	1
S96_559090	96	0	1	0	1	0	0	0	1	0	1	0	0	1	1	0	0	0	1	1	0	1	1	0	1	1	0	1	0	1	1	0	0	1	1	1	0	1	1	0	1	0	0	1	0	1	0	0	1
S96_559199	96	0	1	0	1	0	0	0	1	0	1	0	0	1	1	1	0	0	1	1	0	1	1	0	1	1	0	1	0	1	1	0	0	1	1	1	0	1	1	0	1	0	0	1	0	1	0	0	1
S96_575598	96	0	1	0	1	-	0	0	1	0	1	0	0	1	1	0	0	0	1	1	0	1	1	0	1	1	0	1	0	1	0	0	0	1	0	1	0	1	1	0	1	0	0	1	0	1	0	0	1
S96_580633	96	-	1	0	1	-	0	0	1	0	0	0	0	1	0	-	0	0	1	0	0	1	1	0	0	1	0	1	0	0	0	0	0	1	1	1	0	1	0	0	1	0	0	1	0	1	0	0	0
S96_594321	96	0	1	0	1	0	0	0	1	0	1	0	0	1	1	0	0	0	1	1	0	1	1	0	1	1	0	1	0	1	-	0	0	1	1	1	0	1	1	0	1	0	0	1	0	0	0	0	1
S96_608495	96	-	1	0	1	0	0	0	1	0	1	0	0	1	1	-	0	0	1	1	0	1	0	0	1	0	0	1	0	1	1	0	0	0	0	0	0	1	0	0	1	0	0	1	0	1	0	0	0
S96_609061	96	0	1	0	1	-	0	-	1	0	0	0	0	1	1	0	0	0	1	1	0	1	1	0	1	1	0	1	0	1	0	0	0	1	1	1	0	1	1	0	1	0	0	1	0	1	0	0	1
S96_609555	96	0	1	0	1	0	0	0	1	0	0	0	0	1	1	0	0	0	1	0	0	-	1	0	1	1	0	1	0	-	0	0	0	0	-	1	0	0	1	0	1	0	0	1	0	1	0	0	1
S96_613840	96	0	1	0	1	0	0	0	1	0	1	0	0	1	1	1	0	0	0	1	0	0	1	0	1	1	0	1	0	1	0	0	0	1	1	1	0	0	1	0	1	0	0	1	0	0	0	0	1
S96_643075	96	0	1	0	1	0	0	0	1	0	1	0	0	1	0	-	0	0	1	1	0	1	1	0	1	0	0	1	0	1	1	0	0	1	1	1	0	1	1	0	1	0	0	1	0	0	0	0	1
S96_653242	96	0	1	0	1	0	0	0	1	0	1	0	0	0	1	0	0	0	1	1	0	1	1	0	1	1	0	0	0	1	1	0	0	1	1	1	0	1	1	0	1	0	0	1	0	1	0	0	1
S96_692571	96	0	1	0	1	-	0	0	1	0	0	0	0	0	1	0	0	0	1	1	0	1	1	0	1	1	0	1	0	1	0	0	0	1	1	1	0	1	-	0	0	0	0	1	0	0	0	0	1
S96_692675	96	0	1	0	1	0	0	0	1	0	0	0	0	0	1	-	0	0	1	1	0	1	1	0	1	1	0	1	0	-	1	0	0	1	1	1	0	1	1	0	1	0	0	1	0	0	0	0	1
S96_695525	96	0	1	0	1	0	0	0	1	0	1	0	0	0	1	-	0	0	1	1	0	1	1	0	1	1	0	1	0	1	1	0	0	1	0	1	0	1	0	0	1	0	0	1	0	1	0	0	1
S96_771238	96	0	1	0	1	0	0	0	1	0	-	0	0	0	-	-	0	0	0	0	0	1	1	0	1	1	0	1	0	1	0	0	0	1	1	1	0	1	1	0	1	0	0	1	0	0	0	0	1
S96_782393	96	0	1	0	1	0	0	0	1	0	1	0	0	0	1	0	0	0	1	1	0	1	1	0	1	1	0	1	0	1	1	0	0	1	1	1	0	1	1	0	1	0	0	1	0	1	0	0	1
S96_811035	96	0	1	0	1	0	-	-	1	0	1	0	0	0	1	-	0	0	1	1	0	0	1	0	0	1	0	1	0	1	0	0	0	0	0	1	0	1	0	0	1	0	0	1	0	-	0	0	1
S96_844533	96	0	1	0	1	0	-	0	1	0	1	0	0	0	1	0	0	0	1	0	0	1	1	0	1	0	0	1	-	-	0	0	0	1	1	1	0	1	0	0	0	0	0	1	0	0	0	0	1
S96_855180	96	0	1	0	1	0	0	0	1	0	1	0	0	0	1	0	0	0	1	1	0	1	1	0	1	1	0	0	0	1	1	0	0	1	1	1	0	1	0	0	1	0	0	1	0	0	0	0	1
S96_871233	96	0	1	0	1	0	-	0	1	0	1	0	0	0	1	0	0	0	1	1	0	1	1	0	1	1	0	1	0	1	1	0	0	1	1	1	0	1	0	0	1	0	0	1	0	1	0	0	1
S96_980704	96	1	1	0	1	0	0	0	1	0	1	0	0	0	1	-	0	0	1	1	0	1	1	0	1	1	0	1	0	1	1	0	0	1	1	1	0	1	1	1	1	0	0	1	0	1	0	0	1
S96_995831	96	1	1	0	1	0	0	0	1	0	1	0	0	0	1	1	0	0	1	1	0	1	1	0	1	1	0	1	0	1	0	0	0	1	1	1	0	1	1	1	1	0	0	1	0	0	0	0	1
S96_1046443	96	-	1	0	1	0	0	0	1	0	0	0	0	0	1	-	-	0	0	1	0	1	1	0	1	1	0	1	0	1	0	0	0	0	0	1	0	1	1	1	1	0	0	1	0	0	0	0	1
S96_1050702	96	1	1	0	1	0	0	0	1	0	1	0	0	0	1	0	0	0	1	1	0	0	1	0	1	1	0	1	0	1	1	0	0	1	1	1	0	1	1	1	1	0	0	1	0	1	0	0	1
S96_1058046	96	1	1	0	1	0	0	0	1	0	1	0	0	0	1	0	0	0	1	1	0	1	1	0	1	1	0	1	0	1	0	0	0	1	1	1	0	1	1	1	1	0	0	1	0	0	0	0	1
S96_1060237	96	0	1	0	1	0	0	0	1	0	1	0	0	0	1	1	0	0	1	1	0	1	1	0	1	1	0	1	0	1	1	0	0	1	1	1	0	1	1	1	1	0	0	1	0	1	0	0	1
S96_1102186	96	1	1	0	1	0	0	0	1	0	1	0	0	0	1	1	0	0	1	1	0	1	1	0	1	1	0	1	0	0	1	0	0	1	1	1	0	1	1	1	1	0	0	1	0	1	0	0	1
S96_1116626	96	0	1	0	1	0	0	0	0	0	1	0	0	0	1	1	0	0	1	1	0	1	1	0	0	1	0	1	0	1	1	0	0	1	1	0	0	1	1	0	1	0	0	1	0	1	0	0	1
S96_1121923	96	0	1	0	1	-	0	0	1	0	1	0	0	0	1	0	0	0	-	1	0	0	1	0	1	0	0	1	0	1	0	0	0	1	-	1	0	1	0	1	1	0	0	1	0	0	0	0	1
S96_1122372	96	1	1	0	1	0	0	0	1	0	1	0	0	0	1	1	0	0	1	1	0	0	1	0	1	1	0	1	0	1	1	0	0	1	1	1	0	1	1	1	1	0	0	1	0	1	0	0	1
S96_1122477	96	1	1	0	1	0	0	0	1	0	1	0	0	0	1	1	0	0	1	1	0	1	1	0	1	1	0	1	0	1	1	0	0	1	1	1	0	1	1	1	1	0	0	1	0	1	0	0	1
S96_1122584	96	1	1	0	1	0	0	0	1	0	1	0	0	0	1	0	0	0	1	1	0	1	1	0	1	1	0	1	0	1	1	0	0	1	1	1	0	0	1	1	1	0	0	1	0	1	0	0	1
S96_1124702	96	0	1	0	1	0	0	0	1	0	1	0	0	0	1	1	0	0	1	1	0	0	1	0	1	1	0	1	0	1	0	0	0	1	-	1	0	1	1	1	1	0	0	0	0	0	0	0	1
S96_1124803	96	0	1	1	1	0	0	0	1	0	1	0	0	0	1	-	0	0	1	1	0	1	1	0	1	1	0	1	0	1	0	0	0	1	1	1	0	1	0	1	1	0	0	1	0	1	1	0	1
S96_1130317	96	1	1	0	1	-	0	0	1	-	-	0	0	0	1	0	0	0	0	1	0	1	1	0	1	1	0	1	0	0	1	0	0	1	0	1	0	0	1	1	1	0	0	1	0	0	0	0	1
S96_1130577	96	1	1	0	1	0	-	0	1	0	1	0	0	0	0	0	0	0	1	1	0	1	1	0	1	1	0	1	0	1	1	0	0	1	0	1	0	1	0	1	1	0	0	1	0	0	0	0	1
S96_1130811	96	1	1	0	1	0	0	0	1	0	1	0	0	0	1	1	0	0	0	1	0	1	1	0	1	1	0	1	0	1	1	0	0	1	1	1	0	1	1	1	1	0	0	1	0	1	0	0	1
S96_1160330	96	1	1	0	1	0	0	0	0	0	1	0	0	0	0	-	0	0	0	1	0	0	1	0	1	1	0	1	0	1	0	0	0	1	0	1	0	1	0	1	1	0	0	1	0	1	0	0	0
S96_1181375	96	1	1	0	1	0	0	0	1	0	1	0	0	0	1	0	0	0	1	1	0	0	1	0	0	1	0	1	0	1	1	0	0	1	1	1	0	1	1	1	1	0	0	1	0	1	0	0	1
S96_1181477	96	1	1	0	1	-	0	0	1	0	1	0	0	0	0	-	0	0	1	0	0	0	1	0	1	1	0	1	0	1	0	0	0	1	1	1	0	1	1	1	1	0	0	1	0	0	0	0	1
S96_1239347	96	1	1	0	1	0	0	0	1	0	1	0	0	0	1	-	0	0	1	0	0	0	1	0	1	1	0	1	0	1	0	0	0	1	0	1	0	1	1	1	1	0	0	1	0	0	0	0	0
S96_1249129	96	0	1	0	1	0	0	0	1	0	1	0	0	0	1	1	0	0	1	1	0	0	1	0	1	1	0	1	0	0	1	0	0	0	1	1	0	1	1	1	1	0	0	1	0	1	0	0	1
S96_1254642	96	1	1	0	1	0	0	0	0	0	0	0	0	0	1	0	0	0	1	1	0	0	1	0	1	1	0	1	0	1	1	0	0	1	1	1	0	1	1	1	1	0	0	1	0	1	0	0	1
S96_1283586	96	1	1	0	1	0	0	0	1	0	1	0	0	0	1	1	0	0	1	1	0	0	1	0	1	1	0	0	0	1	1	0	0	1	0	1	0	1	1	1	1	0	0	1	0	1	0	0	1
S96_1292939	96	1	1	0	1	0	0	0	1	0	1	0	0	0	1	1	0	0	1	1	0	0	1	0	1	1	0	1	0	1	1	0	0	1	1	1	0	1	1	1	1	0	0	1	0	1	0	0	1
S96_1307452	96	0	1	0	1	0	0	0	1	0	1	0	0	0	1	0	0	0	1	1	0	0	1	0	0	1	0	0	0	1	0	0	0	1	0	1	0	1	0	1	1	0	0	1	0	1	0	0	1
S96_1324646	96	1	1	0	1	0	0	0	1	0	0	0	0	0	1	1	0	0	1	1	0	0	1	0	1	1	0	1	0	1	1	0	0	1	1	1	0	1	1	1	1	0	0	1	0	0	0	0	1
S96_1328909	96	1	1	0	1	0	0	0	1	0	1	0	0	0	1	1	0	0	1	1	0	0	1	0	1	1	0	1	0	1	1	0	0	1	1	1	0	1	1	1	1	0	0	1	0	1	0	0	1
S96_1329035	96	0	1	0	1	0	0	0	1	0	1	0	0	0	1	0	0	0	0	1	0	0	1	0	1	1	0	0	0	1	0	0	0	1	0	1	0	1	0	1	1	0	0	1	0	0	0	0	1
S96_1351950	96	1	1	0	1	0	0	0	1	0	1	0	0	0	1	1	0	0	0	1	0	0	1	0	0	1	0	1	0	1	-	0	0	1	0	1	0	1	0	1	1	0	0	1	0	0	0	0	0
S96_1352099	96	1	1	0	1	0	0	0	1	0	1	0	0	0	1	0	0	0	1	1	0	0	1	0	1	1	0	1	0	1	1	0	0	1	1	1	0	1	1	1	1	0	0	1	0	1	0	0	1
S96_1354859	96	1	1	0	1	0	0	0	1	0	1	0	0	0	1	0	0	0	0	1	0	0	1	0	1	1	0	1	0	1	1	0	0	1	1	1	0	1	1	1	1	0	0	1	0	1	0	0	1
S96_1355255	96	0	1	0	1	0	0	0	1	0	0	0	0	0	1	0	-	0	0	1	0	0	1	0	1	1	0	0	-	0	1	0	-	1	1	1	0	1	0	1	1	0	0	0	0	0	0	0	1
S96_1355513	96	1	1	0	1	0	0	0	1	0	0	0	0	-	0	-	-	0	1	1	0	0	1	0	1	1	0	1	0	0	1	0	0	1	0	1	0	1	1	1	1	-	0	1	0	1	0	0	1
S96_1357898	96	1	1	0	1	0	0	0	1	0	1	0	0	0	1	1	0	0	1	1	0	0	1	0	1	1	0	1	0	1	1	0	0	1	1	1	0	1	1	1	1	0	0	1	0	1	0	0	1
S96_1369979	96	1	1	0	1	0	0	0	1	0	1	0	0	-	0	0	0	0	1	1	0	0	1	0	1	1	0	1	0	0	1	0	0	1	1	1	0	1	1	1	1	0	0	1	0	0	0	0	1
S96_1370447	96	-	1	0	1	0	0	0	1	0	-	0	0	0	1	1	0	0	1	1	0	0	1	0	1	1	0	1	0	0	1	0	0	0	1	1	0	-	1	1	1	0	0	0	0	0	0	0	1
S96_1403210	96	1	1	0	1	0	0	0	1	0	1	0	0	0	1	-	0	0	1	1	0	0	1	0	1	1	0	1	0	0	1	0	0	1	1	1	0	1	1	1	1	0	0	1	0	1	0	0	1
S96_1403313	96	1	1	0	1	0	0	0	1	0	1	0	0	0	1	1	0	0	1	1	0	0	1	0	1	1	0	1	0	1	1	0	0	1	1	1	0	1	1	1	1	0	0	1	0	1	0	0	1
S96_1417131	96	1	1	0	1	0	0	0	1	0	1	0	0	0	0	-	0	0	1	1	0	0	1	0	1	1	0	1	0	1	1	0	0	1	1	1	0	0	1	1	1	0	0	1	0	1	0	0	1
S96_1435685	96	1	1	0	1	0	0	0	1	0	1	0	0	0	1	1	0	0	1	1	0	0	1	0	1	1	0	1	0	1	1	0	0	1	1	1	0	1	1	1	1	0	0	1	0	1	0	0	1
S96_1439253	96	1	1	0	1	0	-	0	1	0	1	0	0	0	1	0	0	0	1	1	0	0	1	0	1	1	0	1	0	0	1	0	0	1	0	1	0	1	1	1	1	0	0	1	0	0	0	0	1
S96_1457314	96	0	1	0	1	-	0	0	1	0	1	0	-	0	1	-	0	0	1	0	0	0	1	0	1	0	0	1	0	0	1	0	0	1	0	1	0	1	1	1	1	0	0	1	0	0	-	-	0
S96_1467840	96	1	1	0	0	0	0	0	0	0	1	0	0	0	0	1	0	0	0	0	0	0	0	0	1	1	0	1	0	1	1	0	0	1	1	1	0	0	1	1	1	0	0	1	0	1	0	0	1
S96_1478338	96	1	1	0	1	0	0	0	1	0	1	0	0	0	1	1	0	0	1	1	0	0	1	0	1	1	0	1	0	1	1	0	0	1	1	1	0	1	1	1	1	0	0	1	0	1	0	0	1
S96_1500746	96	1	1	0	1	0	0	0	1	0	1	0	0	0	1	0	0	0	0	1	0	0	1	0	1	0	0	1	0	1	1	0	0	1	1	1	0	1	0	1	1	0	0	1	0	1	0	0	1
S96_1512021	96	1	1	0	1	0	0	0	1	0	0	0	0	0	1	0	0	0	1	1	0	0	1	0	1	1	0	1	0	1	1	0	0	1	1	1	0	1	1	1	1	0	0	1	0	1	0	0	1
S96_1518496	96	1	1	0	1	0	0	0	0	0	0	0	0	0	1	0	0	0	1	1	0	0	1	0	1	1	0	1	0	0	0	0	0	1	1	1	0	1	1	1	1	0	0	1	0	0	0	0	1
S96_1518596	96	0	1	0	1	0	0	0	1	0	0	0	0	0	1	-	0	0	1	0	0	0	1	0	1	1	0	1	0	1	1	0	0	1	0	1	0	1	1	1	1	0	0	1	0	1	0	0	0
S96_1525843	96	1	1	0	1	0	0	0	1	0	1	0	0	0	1	1	0	0	1	1	0	0	1	0	1	1	0	1	0	1	1	0	0	1	1	1	0	1	1	1	1	0	0	1	0	1	0	0	1
S96_1567797	96	1	1	0	1	0	0	0	1	0	1	0	0	0	1	1	0	0	1	1	0	0	1	0	1	1	0	1	0	1	1	0	0	1	1	1	0	1	1	1	1	0	0	1	0	1	0	0	1
S96_1605363	96	1	1	0	1	0	0	0	1	0	1	0	0	0	1	0	0	0	1	1	0	0	1	0	1	1	0	1	0	1	1	0	0	1	1	1	0	1	1	1	1	0	0	1	0	1	0	0	1
S96_1606047	96	1	1	0	1	0	0	0	1	0	1	0	0	0	1	-	0	0	1	1	0	0	1	0	1	0	0	1	0	1	1	0	0	1	1	1	0	1	1	1	1	0	0	1	0	1	0	0	1
S96_1616614	96	0	1	0	1	0	-	0	1	0	0	0	0	0	1	0	0	0	1	1	0	0	1	0	1	1	0	1	0	0	0	0	0	1	1	1	0	1	1	1	1	0	0	1	0	-	0	0	0
S96_1634707	96	1	1	0	1	-	0	0	1	0	1	0	0	0	1	1	-	0	1	1	0	0	1	0	1	1	0	1	0	0	1	0	0	0	1	1	0	1	1	1	1	0	0	1	0	0	0	0	0
S96_1643595	96	1	1	0	1	0	0	0	1	0	1	0	0	0	1	0	0	0	1	1	0	0	1	0	1	1	0	1	0	1	1	0	0	1	1	0	0	1	1	1	1	0	0	1	0	1	0	0	1
S96_1644716	96	0	1	0	1	0	0	0	1	0	1	0	0	0	1	1	0	0	1	1	0	0	1	0	1	1	1	1	0	1	1	0	0	1	1	1	0	1	1	1	1	0	0	1	0	0	0	0	1
S96_1644816	96	0	1	0	1	0	0	0	1	0	1	0	0	0	1	-	0	0	1	1	0	0	1	0	1	1	0	1	0	1	1	0	0	1	1	1	0	1	1	1	1	0	0	1	0	-	0	0	1
S96_1666967	96	0	1	0	1	0	0	0	1	0	1	0	0	0	1	1	0	0	1	1	0	0	1	0	1	1	0	1	0	1	1	0	0	1	1	1	0	1	1	1	1	0	0	1	0	0	0	0	1
S96_1670229	96	0	1	1	1	0	0	1	0	0	1	1	1	0	1	-	1	1	0	1	1	1	1	1	0	1	1	0	1	0	0	1	1	1	1	1	1	1	1	1	1	1	0	1	1	0	1	1	0
S96_1670365	96	0	1	0	0	0	0	1	1	1	-	0	1	1	0	-	0	0	0	-	1	1	1	1	1	1	1	1	0	-	0	1	1	1	1	1	1	0	1	0	1	1	1	1	1	0	1	1	0
S96_1716057	96	1	1	0	1	0	0	0	1	0	1	0	0	0	1	1	0	0	1	1	0	0	1	0	1	1	0	1	0	1	1	0	0	1	1	1	0	1	1	1	1	0	0	1	0	1	0	0	1
S96_1731541	96	0	1	0	1	0	0	0	1	0	1	0	0	0	1	1	0	0	1	1	0	0	1	0	1	1	0	1	0	1	1	0	0	1	0	1	0	1	1	1	1	0	0	0	0	-	0	0	1
S96_1734821	96	1	1	0	1	0	0	0	1	0	1	0	0	0	1	-	0	0	0	1	0	0	1	0	1	1	0	1	0	0	1	0	0	1	1	1	0	1	1	1	1	0	0	1	0	1	0	0	1
S96_1736141	96	0	1	0	1	-	0	0	1	0	1	0	0	0	1	1	0	0	1	1	0	0	1	0	1	1	0	1	0	1	1	0	0	1	0	1	0	1	1	1	1	0	0	1	0	0	0	0	1
S96_1736241	96	1	1	0	1	0	0	0	1	0	1	0	0	0	1	-	0	0	1	1	0	0	1	0	1	1	0	1	0	1	0	0	0	1	1	1	0	1	1	1	1	0	0	1	0	0	0	0	0
S96_1768199	96	0	1	0	0	1	0	0	0	0	-	0	0	1	1	-	1	0	0	1	0	1	0	0	0	0	0	0	0	0	1	0	1	0	0	1	0	0	0	0	0	1	0	0	0	0	1	0	0
S96_1811373	96	1	1	0	1	0	0	0	1	0	1	0	0	0	1	0	0	0	1	1	0	0	1	0	1	1	0	1	0	1	0	0	0	1	1	1	0	1	0	1	1	0	0	1	0	1	0	0	1
S96_1823222	96	1	1	0	1	0	0	0	1	0	1	0	0	0	1	-	0	0	1	1	0	0	1	0	1	1	0	1	0	1	1	0	0	1	1	1	0	1	1	1	1	0	0	1	0	1	0	0	1
S96_1873933	96	0	1	0	1	-	0	0	1	0	1	0	0	0	0	-	0	0	1	1	0	0	1	0	0	1	0	1	0	0	0	0	0	1	0	1	0	1	1	1	1	0	0	1	0	1	0	0	1
S96_1906546	96	0	1	0	1	0	0	0	1	0	0	0	0	0	0	0	0	0	0	1	0	0	0	0	1	1	0	1	0	0	0	0	0	0	1	1	0	1	1	1	1	0	0	0	0	-	0	0	1
S96_1906704	96	0	1	0	0	0	0	0	1	0	1	0	0	0	1	-	0	0	0	1	0	0	1	0	1	1	0	1	0	1	1	0	0	1	0	1	0	1	0	1	1	0	0	1	0	0	0	0	1
S96_1907893	96	1	1	0	1	0	0	0	1	0	1	0	0	0	1	1	0	0	0	1	0	0	1	0	1	1	0	1	0	1	1	0	0	1	1	1	0	1	1	1	1	0	0	1	0	1	0	0	1
S96_1913960	96	1	1	0	1	0	0	0	1	0	1	0	0	0	1	0	0	0	0	1	0	0	1	0	1	1	0	1	0	1	1	0	0	1	1	1	0	1	1	1	1	0	0	1	0	1	0	0	1
S96_1923990	96	1	1	0	1	-	-	0	1	-	1	0	-	0	1	-	0	0	0	1	0	0	1	0	1	1	0	1	0	0	1	0	0	1	1	1	0	0	1	1	1	0	0	1	0	1	0	0	1
S96_1945055	96	1	1	0	1	0	0	0	1	0	1	0	0	0	1	0	0	0	0	1	0	0	1	0	1	1	0	1	0	1	0	0	0	1	1	1	0	0	1	1	1	0	0	1	0	1	0	0	1
S96_1945647	96	1	1	0	1	0	0	0	1	0	1	0	0	0	1	1	0	0	0	1	0	0	1	0	1	1	0	1	0	1	1	0	0	1	1	1	0	1	1	1	1	0	0	1	0	1	0	0	1
S96_1946511	96	1	1	0	1	0	0	0	1	0	1	0	0	0	1	1	0	0	0	1	0	0	1	0	1	1	0	1	0	1	1	0	0	1	1	1	0	1	1	1	1	0	0	1	0	1	0	0	1
S96_1956835	96	0	1	0	1	0	-	0	0	0	0	0	0	0	1	0	0	0	0	1	0	0	1	0	1	1	0	1	0	1	1	0	0	1	1	0	0	1	0	1	1	0	0	1	0	-	0	0	1
S96_1993425	96	1	1	0	1	-	0	0	1	0	1	0	0	0	1	1	0	0	0	1	0	0	1	0	1	1	0	1	0	1	1	0	0	1	1	1	0	1	1	1	1	0	0	1	0	0	0	0	1
S96_2003760	96	1	1	0	1	0	0	0	1	0	1	0	0	0	1	0	0	0	0	1	0	0	1	0	1	1	0	1	0	1	1	0	0	1	1	1	0	1	1	1	1	0	0	1	0	1	0	0	1
S96_2070390	96	1	1	0	1	0	0	0	1	0	1	0	0	0	1	1	0	0	0	1	0	0	1	0	1	1	0	1	0	1	1	0	0	1	1	1	0	1	1	1	1	0	0	1	0	1	0	0	1
S96_2073436	96	1	1	0	1	0	0	0	1	0	1	0	0	0	1	1	0	0	0	1	0	0	1	0	1	1	0	1	0	0	1	0	0	1	1	1	0	1	1	1	1	0	0	1	0	1	0	0	1
S96_2073543	96	0	1	0	1	0	-	0	1	0	0	0	0	0	1	1	0	0	0	1	0	0	1	0	1	1	0	1	0	0	1	0	0	0	1	1	0	1	1	1	1	0	0	1	0	1	0	0	1
S96_2073660	96	1	1	0	1	0	0	0	1	0	1	0	0	0	1	1	0	0	0	1	0	0	1	0	1	1	0	1	0	1	1	0	0	1	1	1	0	1	1	1	1	0	0	1	0	1	0	0	1
S96_2080340	96	0	1	0	1	0	0	0	1	0	1	0	0	0	1	-	0	0	0	1	0	0	1	0	1	1	0	1	0	1	-	0	0	1	1	1	0	1	1	1	0	0	0	1	0	1	0	0	1
S96_2109061	96	0	1	0	1	0	0	0	1	0	0	0	0	0	1	0	0	0	0	1	0	0	1	0	1	0	0	1	0	1	0	0	0	1	1	1	0	1	1	1	1	0	0	0	0	1	0	0	1
S96_2116558	96	0	1	0	1	0	-	0	1	0	1	0	0	0	1	1	0	0	0	1	0	0	1	0	1	1	0	1	0	1	1	0	0	1	0	1	0	1	1	1	1	0	0	1	0	1	0	0	1
S96_2122183	96	1	1	0	1	0	0	0	1	0	1	0	0	0	1	1	0	0	0	1	0	0	1	0	1	1	0	1	0	1	1	0	0	1	1	1	0	1	1	1	1	0	0	1	0	1	0	0	1
S96_2147136	96	0	1	0	1	0	0	0	1	0	1	0	0	0	1	-	0	0	0	1	0	0	1	0	1	1	0	1	0	1	1	0	0	1	1	1	0	1	1	1	1	0	0	1	0	0	0	0	1
S96_2150423	96	0	1	0	1	0	0	0	1	0	0	0	0	0	1	1	0	0	0	1	0	0	1	0	1	1	0	1	0	1	1	0	0	1	1	1	0	1	1	1	1	0	0	1	0	1	0	0	1
S96_2210929	96	1	1	0	1	0	0	0	1	0	1	0	0	0	1	1	0	0	0	1	0	0	1	0	1	1	0	1	0	0	1	0	0	1	0	0	0	1	1	1	1	0	0	1	0	1	0	0	1
S96_2215787	96	1	1	0	1	0	0	0	1	0	1	0	0	0	1	1	0	0	0	1	0	0	1	0	1	1	0	1	0	1	1	0	0	1	1	1	0	1	1	1	1	0	0	1	0	1	0	0	1
S96_2242402	96	1	1	0	1	0	0	0	1	0	1	0	0	0	1	1	0	0	0	1	0	0	1	0	1	1	0	1	0	1	1	0	0	1	1	1	0	1	1	1	1	0	0	1	0	1	0	0	1
S96_2242848	96	1	1	0	1	0	0	0	1	0	1	0	0	0	1	1	0	0	0	1	0	0	1	0	1	1	0	1	0	1	1	0	0	1	1	1	0	1	1	1	1	0	0	1	0	1	0	0	1
S96_2246421	96	1	1	0	1	0	0	0	1	0	1	0	0	0	1	1	0	0	0	1	0	0	1	0	1	1	0	1	0	1	1	0	0	1	1	1	0	1	1	1	1	0	0	1	0	1	0	0	1
S96_2246669	96	1	1	0	1	0	0	0	1	0	1	0	0	0	1	1	0	0	0	1	0	0	1	0	1	1	0	1	0	1	1	0	0	1	1	1	0	1	1	1	1	0	0	1	0	1	0	0	1
S96_2246925	96	1	1	0	1	0	0	0	1	0	1	0	0	0	1	1	0	0	0	1	0	0	1	0	1	1	0	1	0	1	1	0	0	1	1	1	0	1	1	1	1	0	0	1	0	0	0	0	1
S96_2267639	96	1	1	0	1	0	0	0	1	0	1	0	0	0	1	0	0	0	0	1	0	0	1	0	1	1	0	1	0	1	1	0	0	1	1	1	0	1	1	1	1	0	0	1	0	1	0	0	1
S96_2282505	96	1	1	0	1	0	0	0	1	0	1	0	0	0	1	1	0	0	0	1	0	0	1	0	1	1	0	1	0	1	1	0	0	1	1	1	0	1	1	1	1	0	0	1	0	1	0	0	1
S96_2318179	96	1	1	0	1	0	0	0	1	0	1	0	0	0	1	-	0	0	0	1	0	0	1	0	1	1	0	1	0	1	1	0	0	1	1	1	0	0	1	1	1	0	0	1	0	1	0	0	1
S96_2324812	96	1	1	0	1	0	0	0	1	0	0	0	0	0	1	1	0	0	0	1	0	0	1	0	1	1	0	1	0	0	1	0	0	1	1	1	0	1	1	1	1	0	0	1	0	0	0	0	1
S96_2385737	96	1	1	0	1	0	0	0	1	0	1	0	0	0	1	0	0	0	0	1	0	0	1	0	1	1	0	1	0	1	1	0	0	1	1	1	0	1	1	1	1	0	0	1	0	1	0	0	1
S96_2398001	96	1	1	0	1	0	0	0	1	0	1	0	0	0	1	1	0	0	0	0	0	0	1	0	1	1	0	1	0	1	1	0	0	1	0	1	0	1	1	1	1	0	0	1	0	1	0	0	1
S96_2401053	96	1	1	0	1	0	0	0	1	0	1	0	0	0	1	1	0	0	0	1	0	0	1	0	1	1	0	1	0	1	1	0	0	1	1	1	0	1	1	1	1	0	0	1	0	1	0	0	1
S96_2409590	96	1	1	0	1	0	0	0	1	0	0	0	0	0	1	0	0	0	0	1	0	0	1	0	1	1	0	1	0	1	1	0	0	1	1	1	0	1	1	1	1	0	0	1	0	0	0	0	1
S96_2418789	96	0	1	1	1	0	0	0	1	-	1	0	0	0	0	1	0	1	0	1	0	0	1	0	1	1	0	1	0	0	0	0	0	1	1	1	0	1	0	1	0	0	0	0	0	0	0	0	1
S96_2528195	96	-	1	1	1	-	0	0	0	0	1	1	-	0	1	-	-	0	1	-	1	1	1	1	1	1	1	1	1	0	-	1	1	1	1	1	1	-	1	1	0	0	1	1	1	-	0	1	0
	96 Average	0.506849	0.986755	0.0264901	0.97351	0.0149254	0.00735294	0.0135135	0.92053	0.00675676	0.826389	0.0198675	0.0136054	0.228188	0.886667	0.509259	0.0206897	0.013245	0.624161	0.918367	0.0198675	0.346667	0.966887	0.0198675	0.907285	0.92053	0.0264901	0.92053	0.0268456	0.761905	0.734694	0.0264901	0.033557	0.907285	0.802721	0.953642	0.0264901	0.919463	0.826667	0.695364	0.94702	0.0266667	0.0198675	0.933775	0.0264901	0.671329	0.0333333	0.0266667	0.887417
S97_106224	97	0	1	0	0	0	-	0	0	-	0	1	0	1	0	0	1	0	0	1	0	0	0	0	1	0	0	0	1	0	0	1	0	0	1	0	0	1	0	1	0	0	1	1	0	-	1	1	0
S97_268762	97	0	1	0	0	1	0	0	0	0	0	1	0	1	0	1	1	0	0	1	0	1	0	0	1	0	1	0	1	0	0	1	0	0	1	0	0	1	0	1	0	0	1	1	0	1	0	1	0
	97 Average	0	1	0	0	0.5	0	0	0	0	0	1	0	1	0	0.5	1	0	0	1	0	0.5	0	0	1	0	0.5	0	1	0	0	1	0	0	1	0	0	1	0	1	0	0	1	1	0	1	0.5	1	0
S101_10948	101	1	0	0	1	0	0	1	1	1	0	1	0	1	0	-	0	0	1	0	0	1	0	1	1	0	1	1	1	0	1	0	0	1	0	1	0	1	0	1	1	0	0	0	0	0	0	0	0
S101_109766	101	-	0	0	1	0	-	1	1	0	0	1	0	0	0	1	-	0	1	-	0	1	0	1	0	0	1	1	1	0	0	0	-	0	0	1	0	0	1	1	1	0	-	0	0	-	0	0	0
S101_177693	101	0	0	0	1	1	-	1	1	0	0	1	0	0	0	0	0	0	0	0	0	0	0	1	1	0	1	0	-	0	-	0	0	1	-	1	0	1	1	1	1	-	0	0	0	-	0	0	0
S101_188448	101	0	0	0	1	1	0	1	1	0	0	1	0	1	0	0	0	0	-	0	0	1	0	1	1	0	1	1	0	0	1	0	0	1	0	1	0	1	0	1	1	0	0	0	0	0	0	0	0
	101 Average	0.333333	0	0	1	0.5	0	1	1	0.25	0	1	0	0.5	0	0.333333	0	0	0.666667	0	0	0.75	0	1	0.75	0	1	0.75	0.666667	0	0.666667	0	0	0.75	0	1	0	0.75	0.5	1	1	0	0	0	0	0	0	0	0
S102_68360	102	0	1	0	1	0	1	1	0	0	1	1	0	1	1	0	0	0	1	1	0	1	0	1	1	0	1	0	1	1	1	0	0	0	0	0	1	0	0	0	1	0	0	1	0	0	1	0	1
	102 Average	0	1	0	1	0	1	1	0	0	1	1	0	1	1	0	0	0	1	1	0	1	0	1	1	0	1	0	1	1	1	0	0	0	0	0	1	0	0	0	1	0	0	1	0	0	1	0	1
S103_176821	103	1	1	0	1	0	0	0	1	1	0	0	0	1	0	0	0	1	0	0	0	1	0	0	0	0	1	0	1	1	0	0	0	0	0	1	1	0	0	1	1	0	0	0	0	1	1	0	0
S103_373834	103	1	1	0	1	0	1	0	1	1	0	0	0	1	0	0	0	1	0	0	0	1	0	0	0	0	1	0	1	0	0	0	0	0	0	1	1	0	0	1	1	0	0	0	0	0	1	0	0
S103_374004	103	1	1	0	1	0	1	0	1	1	0	0	0	1	0	0	0	1	0	0	0	1	0	0	0	0	1	0	1	1	0	0	0	0	0	1	1	0	0	1	1	0	0	0	0	1	1	0	0
	103 Average	1	1	0	1	0	0.666667	0	1	1	0	0	0	1	0	0	0	1	0	0	0	1	0	0	0	0	1	0	1	0.666667	0	0	0	0	0	1	1	0	0	1	1	0	0	0	0	0.666667	1	0	0
S104_110585	104	0	0	0	0	0	1	1	0	1	0	1	0	0	0	0	0	1	0	1	0	1	0	0	1	0	0	1	1	-	0	1	1	1	0	0	1	1	1	0	1	1	1	0	0	0	0	0	0
S104_111467	104	0	0	0	0	0	1	1	0	1	0	1	0	0	0	-	0	1	0	1	0	1	0	1	1	0	0	1	1	0	0	1	1	1	1	1	1	1	1	0	1	1	1	0	0	0	0	0	0
S104_120561	104	0	0	0	0	0	1	0	0	-	0	1	0	0	0	-	0	1	-	0	0	1	0	1	1	0	0	1	1	0	0	1	1	1	1	0	1	1	1	0	1	1	1	0	0	0	0	0	0
S104_153682	104	0	0	0	0	1	1	1	0	1	0	1	0	0	0	0	0	1	0	1	0	1	0	1	1	0	0	1	1	0	0	1	1	1	0	1	1	1	1	0	1	0	1	0	0	0	0	0	0
S104_179859	104	0	0	0	0	1	1	1	0	1	0	1	0	0	0	1	0	1	0	1	0	1	0	1	1	0	0	0	1	0	0	1	1	1	1	1	1	1	1	0	1	1	1	0	0	0	0	0	0
S104_312187	104	0	0	0	0	1	1	0	0	1	0	1	0	0	0	0	0	1	0	1	0	0	0	1	1	0	0	1	1	0	0	1	0	1	0	1	1	1	1	0	1	1	1	0	0	0	0	0	0
S104_328772	104	0	0	0	0	1	0	1	0	1	0	1	0	0	0	0	0	1	0	1	0	1	0	1	1	0	0	1	1	0	0	1	1	1	1	1	1	1	1	0	1	1	1	0	0	0	0	0	0
S104_347308	104	0	0	0	0	0	-	1	0	1	0	1	0	0	0	-	0	0	0	1	0	1	0	1	1	0	0	1	1	0	0	1	1	1	1	1	1	1	1	0	1	0	1	0	0	0	0	0	0
S104_355668	104	0	0	0	0	1	0	1	0	1	0	1	0	0	0	0	0	1	0	1	0	1	0	1	1	0	0	1	1	0	0	1	1	1	1	1	1	1	0	0	1	1	1	0	0	0	0	0	0
S104_383661	104	-	0	0	0	1	0	1	0	1	0	1	0	0	0	0	0	1	0	1	0	0	0	1	1	0	0	1	1	0	0	1	1	0	1	1	1	1	1	0	1	1	0	0	0	0	0	0	0
S104_384154	104	0	0	0	0	1	0	1	0	1	0	0	0	0	0	0	0	0	0	1	0	1	0	1	1	0	0	1	1	0	0	0	1	1	1	1	1	1	1	0	1	1	0	0	0	0	0	0	0
S104_436300	104	0	0	0	0	1	-	1	0	1	0	1	0	0	0	1	-	1	0	0	0	1	0	1	1	0	0	1	1	0	0	1	1	1	1	1	1	1	0	0	1	0	1	0	0	0	0	0	0
S104_456385	104	0	0	0	0	1	1	1	0	1	0	1	0	0	0	0	0	1	0	1	0	1	0	1	1	0	0	1	1	0	0	1	1	1	1	1	1	1	1	0	1	1	1	0	0	0	0	0	0
[truncated: 6,904 more rows]
[truncated: 46 more columns]
