# Supplementary material for: Ultra-High-Density Genetic Maps of Jatropha curcas × Jatropha integerrima and Anchoring Jatropha curcas Genome Assembly Scaffolds
Source: MDPI journal article supplement (doi:10.3390/f14091907), 2023-09-19
Supplement: s1 [file s1 › Supplementary Table S6_JatCur_1.0 Scaffolds Genotype.xlsx]

## Sheet: JatCur_1.0_Scaffolds Genotypes
Supplementary Table S6: JatCur_1.0 Scaffolds Genotypes of the Mapping Population
rs#	alleles	chrom	pos	strand	assembly#	center	protLSID	assayLSID	panelLSID	QCcode	BC1_35:C4Y4MACXX:5:250355293	BC1_04:C4Y4MACXX:5:250355263	BC1_91:C4Y4MACXX:5:250355344	BC1_13:C4Y4MACXX:5:250355272	BC1_51:C4Y4MACXX:5:250355306	BC1_60:C4Y4MACXX:5:250355315	BC1_73:C4Y4MACXX:5:250355328	BC1_22:C4Y4MACXX:5:250355281	BC1_08:C4Y4MACXX:5:250355267	BC1_69:C4Y4MACXX:5:250355324	BC1_47:C4Y4MACXX:5:250355302	BC1_87:C4Y4MACXX:5:250355340	BC1_95:C4Y4MACXX:5:250355348	BC1_26:C4Y4MACXX:5:250355285	BC1_44:C4Y4MACXX:5:250355299	BC1_65:C4Y4MACXX:5:250355320	BC1_43:C4Y4MACXX:5:250355298	BC1_52:C4Y4MACXX:5:250355307	BC1_92:C4Y4MACXX:5:250355345	BC1_27:C4Y4MACXX:5:250355286	BC1_68:C4Y4MACXX:5:250355323	BC1_96:C4Y4MACXX:5:250355349	BC1_64:C4Y4MACXX:5:250355319	BC1_56:C4Y4MACXX:5:250355311	BC1_90:C4Y4MACXX:5:250355343	BC1_05:C4Y4MACXX:5:250355264	BC1_14:C4Y4MACXX:5:250355273	BC1_23:C4Y4MACXX:5:250355282	BC1_81:C4Y4MACXX:5:250355335	BC1_12:C4Y4MACXX:5:250355271	BC1_50:C4Y4MACXX:5:250355305	BC1_38:C4Y4MACXX:5:250355296	BC1_99:C4Y4MACXX:5:250355350	BC1_59:C4Y4MACXX:5:250355314	BC1_57:C4Y4MACXX:5:250355312	BC1_36:C4Y4MACXX:5:250355294	BC1_66:C4Y4MACXX:5:250355321	BC1_30:C4Y4MACXX:5:250355289	BC1_21:C4Y4MACXX:5:250355280
S1_27149	T	1	27149	+	NA	NA	NA	NA	NA	NA	T	T	T	T	T	T	T	T	T	T	T	T	T	T	T	T	T	T	T	T	T	T	T	T	T	T	T	T	T	T	T	T	T	T	T	T	T	T	T
S1_48009	G/A	1	48009	+	NA	NA	NA	NA	NA	NA	G	G	R	G	G	G	G	G	G	G	G	G	G	G	G	G	G	G	G	G	G	G	G	G	G	G	G	G	G	G	G	G	G	G	G	G	G	G	G
S1_127946	C/T	1	127946	+	NA	NA	NA	NA	NA	NA	C	C	C	C	C	C	C	Y	C	C	C	C	C	C	C	C	C	C	C	C	C	C	C	Y	C	C	C	C	C	C	C	C	C	C	Y	C	C	C	C
S1_136300	A/T	1	136300	+	NA	NA	NA	NA	NA	NA	A	A	W	A	A	A	A	A	A	A	A	A	A	A	A	N	A	A	A	A	A	A	A	A	A	A	A	A	A	A	A	A	A	A	A	A	A	A	A
S1_227016	A/C	1	227016	+	NA	NA	NA	NA	NA	NA	A	M	A	M	A	A	A	M	A	A	A	A	M	M	M	A	A	M	M	A	A	M	A	M	M	A	A	A	A	M	A	A	M	M	M	A	M	M	A
S1_344995	A/T	1	344995	+	NA	NA	NA	NA	NA	NA	A	W	A	W	A	A	A	A	A	W	A	A	W	W	W	A	A	W	W	A	W	W	A	A	W	A	W	A	W	W	A	A	W	W	A	A	W	W	A
S2_54658	G/C	2	54658	+	NA	NA	NA	NA	NA	NA	S	S	G	S	G	S	G	S	S	G	G	G	S	G	G	G	S	G	G	G	S	G	G	G	G	S	G	S	S	G	G	G	G	G	S	S	G	G	S
S2_181933	C/T	2	181933	+	NA	NA	NA	NA	NA	NA	C	Y	C	Y	C	Y	C	C	Y	C	C	C	Y	C	C	C	Y	C	C	C	Y	C	C	C	C	C	C	Y	Y	C	C	C	C	C	C	Y	C	C	C
S2_184155	G/C	2	184155	+	NA	NA	NA	NA	NA	NA	C	G	G	G	G	N	G	S	G	G	G	G	G	G	N	G	G	G	G	G	G	G	G	G	G	S	G	G	G	G	G	G	G	G	S	G	G	G	S
S2_243675	G/C	2	243675	+	NA	NA	NA	NA	NA	NA	S	S	G	S	N	S	G	S	S	G	G	G	S	G	N	G	C	G	G	G	S	G	G	G	G	C	G	S	S	G	G	N	G	G	S	S	G	G	C
S2_244905	A/T	2	244905	+	NA	NA	NA	NA	NA	NA	T	T	A	T	A	W	A	T	T	A	A	A	T	A	A	A	T	A	A	A	T	A	A	A	A	T	A	T	T	A	A	A	A	A	T	T	A	A	T
S2_245038	A/G	2	245038	+	NA	NA	NA	NA	NA	NA	R	R	N	G	A	R	A	R	G	A	A	A	R	A	A	A	G	N	A	A	R	A	A	A	R	R	A	G	G	A	A	A	A	A	R	G	A	A	G
S2_246569	A/G	2	246569	+	NA	NA	NA	NA	NA	NA	G	R	A	R	A	G	A	R	G	A	A	A	R	A	A	A	G	A	A	A	R	A	A	A	A	R	A	R	A	A	A	A	A	A	A	R	A	A	R
S2_249128	C/G	2	249128	+	NA	NA	NA	NA	NA	NA	S	S	C	S	C	S	C	S	S	C	C	C	S	C	C	C	S	C	C	C	S	C	C	C	C	S	C	S	S	C	C	C	C	C	S	S	C	C	S
S2_250099	T/C	2	250099	+	NA	NA	NA	NA	NA	NA	Y	Y	T	Y	T	Y	T	Y	Y	T	T	T	Y	T	T	T	Y	T	T	T	Y	T	T	T	T	Y	T	Y	Y	T	T	T	T	T	Y	Y	T	T	Y
S2_250235	A/T	2	250235	+	NA	NA	NA	NA	NA	NA	W	A	A	A	A	A	A	W	A	A	A	A	A	A	A	A	A	A	A	A	A	A	A	A	A	W	A	A	A	A	A	A	A	A	W	A	A	A	W
S2_250343	T/A	2	250343	+	NA	NA	NA	NA	NA	NA	T	W	T	W	T	T	T	A	W	T	T	T	W	T	T	T	W	T	T	T	W	T	T	T	T	W	T	W	A	T	T	T	T	T	W	W	T	T	W
S2_250486	A/G	2	250486	+	NA	NA	NA	NA	NA	NA	A	R	A	R	A	A	A	R	A	N	A	N	A	A	A	A	A	A	A	A	A	A	A	A	A	R	A	R	N	A	A	A	A	A	R	R	A	A	R
S2_254119	C/G	2	254119	+	NA	NA	NA	NA	NA	NA	S	S	C	S	C	C	C	S	S	C	C	C	C	C	C	C	S	C	C	C	S	C	C	C	C	S	C	S	S	C	C	C	C	C	S	S	C	S	S
S2_330242	G/T	2	330242	+	NA	NA	NA	NA	NA	NA	G	K	G	K	G	N	G	K	K	G	G	G	K	G	N	G	K	G	G	G	G	G	G	G	G	K	G	K	T	G	G	G	G	G	K	K	G	G	K
S2_330349	C/G	2	330349	+	NA	NA	NA	NA	NA	NA	S	S	C	S	C	S	C	S	S	C	C	C	S	C	C	C	S	C	C	C	S	C	C	C	C	S	C	S	S	C	C	C	C	C	S	S	C	C	S
S2_331597	T/C	2	331597	+	NA	NA	NA	NA	NA	NA	Y	T	T	T	T	T	T	Y	T	T	T	T	T	T	T	T	T	T	T	T	T	T	T	T	T	Y	T	T	T	T	T	T	T	T	Y	T	T	T	Y
S2_377981	T/G	2	377981	+	NA	NA	NA	NA	NA	NA	G	K	T	K	T	T	T	T	K	T	T	T	G	T	N	T	T	N	T	T	T	T	T	T	T	K	T	G	N	T	T	T	T	N	K	K	T	T	K
S2_389962	T/C	2	389962	+	NA	NA	NA	NA	NA	NA	N	Y	T	Y	T	T	T	Y	Y	T	T	T	Y	T	T	T	C	T	T	T	Y	T	T	T	T	Y	T	Y	Y	T	T	T	T	T	Y	Y	T	T	Y
S2_508219	T/C	2	508219	+	NA	NA	NA	NA	NA	NA	Y	Y	T	Y	T	Y	T	Y	Y	T	T	T	Y	T	T	T	Y	T	T	T	Y	T	T	T	T	Y	T	Y	Y	T	T	T	T	T	Y	Y	T	T	Y
S2_519528	A/G	2	519528	+	NA	NA	NA	NA	NA	NA	R	A	A	R	A	N	A	R	G	A	A	A	G	A	A	N	A	A	A	A	R	A	A	A	A	A	A	R	N	N	A	A	A	A	A	N	A	A	R
S2_521872	G/C	2	521872	+	NA	NA	NA	NA	NA	NA	S	S	G	S	G	S	G	S	S	G	G	G	S	G	G	G	S	G	G	G	S	G	G	G	G	S	G	S	S	G	G	G	G	G	S	S	G	G	S
S2_521983	G/T	2	521983	+	NA	NA	NA	NA	NA	NA	G	G	G	G	G	G	G	G	K	G	G	G	G	G	G	G	G	G	G	G	G	G	G	G	G	G	G	K	G	G	G	G	G	G	G	G	G	G	G
S2_523653	A/T	2	523653	+	NA	NA	NA	NA	NA	NA	W	W	A	W	A	A	A	W	W	A	A	A	W	A	A	A	W	A	A	A	W	A	A	A	A	W	A	W	W	A	A	A	A	A	W	W	A	A	W
S2_605915	C/A	2	605915	+	NA	NA	NA	NA	NA	NA	M	M	C	M	C	M	C	M	M	C	C	C	M	C	C	C	M	C	C	C	M	C	C	C	C	M	C	M	M	C	C	C	C	C	M	M	C	C	M
S2_621519	C/A	2	621519	+	NA	NA	NA	NA	NA	NA	M	M	C	M	C	M	C	M	M	C	C	C	M	C	C	C	M	C	C	C	M	C	C	C	C	M	C	M	M	C	C	C	C	C	M	M	C	C	M
S2_626664	A/G	2	626664	+	NA	NA	NA	NA	NA	NA	G	A	N	R	N	A	A	R	A	A	A	A	R	N	A	A	A	A	A	A	A	A	A	A	A	R	A	A	A	A	A	A	A	A	G	A	A	A	A
S2_626812	G/C	2	626812	+	NA	NA	NA	NA	NA	NA	G	G	G	G	N	G	G	S	G	G	G	G	N	G	G	G	G	G	G	G	N	G	G	G	G	S	G	G	G	G	G	G	G	G	S	N	G	G	S
S2_634241	A/T	2	634241	+	NA	NA	NA	NA	NA	NA	A	W	A	W	A	N	N	W	W	A	A	A	W	A	N	N	W	A	A	A	W	A	A	A	A	W	A	T	A	W	A	A	A	N	W	W	A	A	W
S2_634370	T/A	2	634370	+	NA	NA	NA	NA	NA	NA	T	W	N	W	N	T	T	W	T	T	T	T	W	T	N	T	W	T	T	T	W	T	T	T	T	W	T	T	T	T	T	T	T	N	W	W	T	T	W
S2_641277	T/A	2	641277	+	NA	NA	NA	NA	NA	NA	W	W	T	W	T	W	T	W	W	T	T	T	W	T	T	T	W	T	T	T	W	T	T	T	T	W	T	W	W	T	T	T	T	T	W	W	T	T	W
S2_646428	C/T	2	646428	+	NA	NA	NA	NA	NA	NA	Y	Y	C	Y	C	C	C	Y	Y	C	C	C	Y	C	C	C	Y	C	C	C	Y	C	C	C	C	Y	C	Y	Y	C	C	C	C	C	Y	Y	C	C	Y
S2_648635	G/A	2	648635	+	NA	NA	NA	NA	NA	NA	R	R	G	R	G	R	G	R	R	G	G	G	R	G	G	G	R	G	G	G	R	G	G	G	G	R	G	R	R	G	G	G	G	G	R	R	G	G	R
S2_687804	G/T	2	687804	+	NA	NA	NA	NA	NA	NA	G	K	G	K	G	T	G	T	K	G	G	G	K	G	N	N	K	G	G	G	K	G	G	G	G	K	G	T	N	G	G	G	G	G	K	K	N	G	K
S2_688802	G/T	2	688802	+	NA	NA	NA	NA	NA	NA	K	G	G	G	G	G	G	K	G	G	G	G	G	G	G	G	G	G	G	G	G	G	G	G	G	K	G	G	G	G	G	G	G	G	K	G	G	G	K
S2_706163	T/G	2	706163	+	NA	NA	NA	NA	NA	NA	K	K	T	K	T	K	T	K	T	T	T	T	K	T	T	T	K	T	T	T	K	T	T	T	T	K	T	K	K	T	T	T	T	T	K	K	T	T	K
S2_716044	C/A	2	716044	+	NA	NA	NA	NA	NA	NA	A	M	C	M	C	A	C	A	A	C	C	C	A	C	N	N	M	C	C	C	M	C	C	C	C	M	N	M	M	C	C	C	C	C	A	A	C	C	M
S2_754963	C/G	2	754963	+	NA	NA	NA	NA	NA	NA	S	S	C	S	C	C	C	S	S	C	C	C	S	C	C	C	S	C	C	C	S	C	C	C	C	S	C	S	S	C	C	C	C	C	S	S	C	C	S
S2_930366	T/C	2	930366	+	NA	NA	NA	NA	NA	NA	Y	Y	T	Y	T	N	T	Y	Y	T	T	T	Y	T	T	T	Y	T	T	T	Y	T	T	T	T	Y	T	Y	C	T	T	T	T	T	Y	Y	T	T	Y
S2_935765	T/C	2	935765	+	NA	NA	NA	NA	NA	NA	C	C	T	C	N	C	T	Y	C	T	T	N	C	T	N	T	C	N	T	T	C	T	T	T	T	C	T	C	C	C	T	N	T	T	C	C	T	N	C
S2_958874	T/G	2	958874	+	NA	NA	NA	NA	NA	NA	G	K	K	K	T	K	T	K	K	T	T	T	K	T	T	T	K	T	T	T	K	T	T	T	T	K	T	K	K	T	T	T	T	T	K	K	T	T	K
S2_971879	G/A	2	971879	+	NA	NA	NA	NA	NA	NA	G	G	R	G	G	N	G	G	G	G	G	G	G	G	G	G	G	G	G	G	G	G	G	G	G	G	G	G	G	G	G	G	G	G	G	G	G	G	G
S2_986473	G/A	2	986473	+	NA	NA	NA	NA	NA	NA	R	R	G	R	G	N	G	R	R	G	G	G	R	G	G	G	R	G	G	G	R	G	G	G	G	R	G	R	R	G	G	G	G	G	R	R	G	G	R
S2_993525	C/T	2	993525	+	NA	NA	NA	NA	NA	NA	Y	Y	C	Y	C	Y	C	Y	Y	C	C	C	Y	C	C	C	Y	C	C	C	Y	C	C	C	C	Y	C	Y	Y	C	C	C	C	C	Y	Y	C	C	Y
S2_1004391	G/A	2	1004391	+	NA	NA	NA	NA	NA	NA	R	R	G	R	G	A	G	R	R	G	G	G	R	G	G	N	R	G	G	G	R	G	G	G	G	R	G	R	R	G	G	G	G	G	R	R	G	G	R
S2_1005863	T/C	2	1005863	+	NA	NA	NA	NA	NA	NA	C	Y	T	Y	T	N	T	Y	C	T	T	T	Y	T	N	T	C	T	T	T	T	T	T	T	T	Y	T	T	N	N	T	T	T	T	Y	Y	T	T	Y
S2_1007498	T/C	2	1007498	+	NA	NA	NA	NA	NA	NA	Y	Y	T	Y	T	Y	T	Y	N	T	T	N	Y	T	T	T	Y	T	T	T	Y	T	T	T	T	Y	T	Y	T	T	T	T	T	T	T	Y	T	T	Y
S2_1011387	T/G	2	1011387	+	NA	NA	NA	NA	NA	NA	T	G	N	K	T	G	T	K	G	T	T	T	K	T	N	T	K	N	T	T	K	T	T	T	T	K	T	T	G	T	T	T	T	T	K	K	T	T	K
S2_1018939	T/A	2	1018939	+	NA	NA	NA	NA	NA	NA	T	T	T	T	T	T	T	T	T	T	T	T	T	T	T	T	W	T	T	T	T	T	T	T	T	T	T	W	T	T	T	T	T	T	T	T	T	T	W
S2_1066421	A/T	2	1066421	+	NA	NA	NA	NA	NA	NA	A	A	A	A	A	A	A	A	A	A	A	A	A	A	A	A	A	A	A	A	A	A	A	A	A	A	A	A	A	A	A	A	A	A	A	A	A	A	A
S2_1066523	A/G	2	1066523	+	NA	NA	NA	NA	NA	NA	R	R	A	R	A	R	A	R	R	A	A	A	R	A	A	A	R	A	A	A	R	A	A	A	A	R	A	R	R	A	A	A	A	A	R	R	A	A	R
S2_1071252	G/T	2	1071252	+	NA	NA	NA	NA	NA	NA	G	K	G	G	G	N	G	K	K	G	G	G	G	G	G	G	K	G	G	G	N	G	G	G	G	K	G	K	G	G	G	G	G	G	G	K	G	G	K
S2_1072373	A/G	2	1072373	+	NA	NA	NA	NA	NA	NA	A	A	A	A	A	A	A	A	A	A	A	A	A	A	A	A	A	A	A	A	A	A	A	A	A	A	A	A	A	A	A	A	A	A	A	A	A	A	A
S2_1080471	T/C	2	1080471	+	NA	NA	NA	NA	NA	NA	T	T	T	T	T	T	T	T	T	T	T	T	T	T	T	T	T	T	T	T	T	T	T	T	T	T	T	T	T	T	T	T	T	T	T	T	T	T	T
S2_1080574	G/A	2	1080574	+	NA	NA	NA	NA	NA	NA	G	R	G	R	G	R	G	R	R	G	G	G	R	G	N	G	R	G	G	G	G	G	G	G	G	R	G	R	A	G	G	G	G	G	R	R	G	G	R
S2_1084154	A/T	2	1084154	+	NA	NA	NA	NA	NA	NA	A	W	A	W	A	W	A	W	W	A	A	A	W	A	A	A	W	A	A	A	W	A	A	A	A	W	A	W	W	A	A	A	A	A	W	W	A	A	W
S2_1133029	T/C	2	1133029	+	NA	NA	NA	NA	NA	NA	Y	Y	T	Y	T	Y	T	Y	Y	T	T	T	Y	T	T	T	Y	T	T	T	Y	T	T	T	T	Y	T	Y	Y	T	T	T	T	T	Y	Y	T	T	Y
S2_1133194	T/A	2	1133194	+	NA	NA	NA	NA	NA	NA	W	W	T	W	T	A	T	W	W	T	T	T	W	T	T	T	W	T	T	T	W	T	T	T	T	W	T	W	A	T	T	T	T	T	W	W	T	T	W
S2_1133611	T/A	2	1133611	+	NA	NA	NA	NA	NA	NA	W	W	T	W	T	A	T	W	W	T	T	T	W	T	T	T	W	T	T	T	T	T	T	T	T	W	T	W	W	T	T	T	T	T	W	W	T	T	W
S2_1174314	C/G	2	1174314	+	NA	NA	NA	NA	NA	NA	C	C	C	C	C	C	C	C	C	C	C	C	C	C	C	C	C	C	C	C	C	C	C	C	C	C	C	C	C	C	C	C	C	C	C	C	C	C	C
S2_1175137	A/T	2	1175137	+	NA	NA	NA	NA	NA	NA	W	W	A	W	A	W	A	W	W	A	A	A	A	A	A	A	W	A	A	A	W	A	A	A	A	W	A	W	W	A	A	A	A	A	W	W	A	A	W
S2_1175767	T/A	2	1175767	+	NA	NA	NA	NA	NA	NA	T	T	T	T	T	T	T	T	T	T	T	T	T	T	N	T	T	T	T	T	T	T	T	T	T	T	T	T	T	T	T	T	T	T	T	T	T	T	T
S2_1175881	C/A	2	1175881	+	NA	NA	NA	NA	NA	NA	M	M	C	M	C	C	C	M	M	C	C	C	M	C	C	C	M	C	C	C	M	C	C	C	C	M	C	M	A	C	C	C	C	C	M	M	C	C	M
S2_1178611	G/C	2	1178611	+	NA	NA	NA	NA	NA	NA	G	G	G	G	G	G	G	G	G	G	G	G	G	G	G	G	G	G	G	G	G	G	G	G	G	G	G	G	G	G	G	G	G	G	G	G	G	G	G
S2_1179104	C/G	2	1179104	+	NA	NA	NA	NA	NA	NA	C	C	S	C	N	C	C	C	C	C	C	C	C	C	N	C	C	C	C	C	S	C	C	C	C	S	C	N	C	C	C	C	C	C	S	C	C	C	C
S2_1188560	C/T	2	1188560	+	NA	NA	NA	NA	NA	NA	Y	Y	N	Y	N	C	C	Y	Y	C	C	C	C	C	N	C	Y	C	C	C	C	C	C	C	C	Y	C	T	C	C	C	C	C	N	Y	Y	C	N	Y
S2_1188791	G/C	2	1188791	+	NA	NA	NA	NA	NA	NA	G	G	G	G	G	G	G	G	G	G	G	G	G	G	G	G	G	G	G	G	G	G	G	G	G	G	G	G	N	G	G	G	G	G	G	G	G	G	G
S2_1195772	G/A	2	1195772	+	NA	NA	NA	NA	NA	NA	R	R	G	R	G	A	G	R	R	G	G	G	R	G	N	G	R	G	G	G	R	G	G	G	G	R	G	R	R	G	G	G	G	G	R	R	G	G	R
S2_1241272	G/A	2	1241272	+	NA	NA	NA	NA	NA	NA	R	R	G	R	G	R	G	R	R	G	G	G	R	G	G	G	R	G	G	G	R	G	G	G	G	R	G	R	R	G	G	G	G	G	R	R	G	G	R
S2_1246752	T/G	2	1246752	+	NA	NA	NA	NA	NA	NA	T	T	T	T	T	T	T	T	T	T	T	T	T	T	T	T	T	T	T	T	K	T	T	T	T	K	T	T	T	T	T	T	T	T	K	T	T	T	T
S2_1273798	A/C	2	1273798	+	NA	NA	NA	NA	NA	NA	A	A	A	M	A	N	A	M	A	A	A	A	M	A	A	A	A	A	A	A	A	A	A	A	A	M	A	A	A	A	A	A	A	A	A	A	A	A	M
S2_1273907	G/A	2	1273907	+	NA	NA	NA	NA	NA	NA	G	R	G	R	N	R	G	R	R	G	G	G	G	G	G	G	R	G	G	G	R	G	G	G	G	R	G	R	R	G	G	G	G	G	R	R	G	G	R
S2_1274059	G/C	2	1274059	+	NA	NA	NA	NA	NA	NA	C	S	G	S	G	G	G	S	C	G	G	G	S	N	N	N	S	G	G	G	N	G	G	G	G	S	G	S	C	G	G	G	G	G	S	G	G	G	S
S2_1289403	G/A	2	1289403	+	NA	NA	NA	NA	NA	NA	R	R	G	R	G	N	G	R	R	G	G	G	R	G	N	N	R	G	G	G	G	G	G	G	G	G	G	R	R	G	G	G	G	G	G	R	G	G	R
S2_1319464	C/T	2	1319464	+	NA	NA	NA	NA	NA	NA	Y	Y	C	Y	C	Y	C	Y	Y	C	C	C	Y	C	C	C	Y	C	C	C	Y	C	C	C	C	Y	C	Y	Y	C	C	C	C	C	Y	Y	C	C	Y
S2_1323407	C/G	2	1323407	+	NA	NA	NA	NA	NA	NA	S	S	C	S	C	C	C	S	C	C	C	C	S	C	C	C	S	C	C	C	S	C	C	C	C	S	C	S	S	N	C	C	C	C	S	S	C	C	S
S2_1325135	A/G	2	1325135	+	NA	NA	NA	NA	NA	NA	R	R	N	R	A	A	A	G	R	A	A	A	R	A	A	N	R	A	A	A	R	A	A	A	A	G	A	A	G	A	A	A	A	A	R	R	A	A	R
S2_1341073	C/T	2	1341073	+	NA	NA	NA	NA	NA	NA	Y	Y	C	Y	C	Y	C	Y	Y	C	C	C	Y	C	C	C	Y	C	C	C	Y	C	C	C	C	Y	C	Y	Y	C	C	C	C	C	Y	Y	C	C	Y
S2_1356009	G/A	2	1356009	+	NA	NA	NA	NA	NA	NA	R	R	G	R	G	A	G	R	R	G	G	G	R	G	G	G	R	G	G	G	R	G	G	G	G	R	G	R	G	N	G	G	G	G	R	R	G	G	R
S2_1379469	G/T	2	1379469	+	NA	NA	NA	NA	NA	NA	G	G	G	G	G	N	G	G	G	G	G	G	G	G	N	G	G	G	G	G	T	G	G	G	G	K	G	G	G	G	G	G	G	G	K	G	G	G	G
S3_62936	T/C	3	62936	+	NA	NA	NA	NA	NA	NA	Y	T	T	Y	N	T	Y	Y	Y	T	Y	T	Y	T	T	T	T	T	T	T	N	T	Y	Y	T	Y	Y	T	T	T	T	T	Y	T	Y	T	Y	Y	Y
S3_148748	C/T	3	148748	+	NA	NA	NA	NA	NA	NA	Y	C	C	Y	Y	C	C	Y	T	C	Y	C	Y	C	N	C	C	T	C	C	C	C	Y	Y	C	T	Y	Y	C	C	C	C	C	C	Y	C	C	Y	T
S3_278962	G/A	3	278962	+	NA	NA	NA	NA	NA	NA	G	G	R	G	G	G	G	G	G	G	G	G	G	G	G	G	G	G	G	G	G	G	G	G	G	G	G	G	G	G	G	G	G	G	G	G	G	G	G
S3_282717	T/G	3	282717	+	NA	NA	NA	NA	NA	NA	N	T	T	T	T	N	K	T	T	T	K	T	T	T	K	T	T	G	T	T	K	T	K	T	T	K	T	T	T	T	T	T	K	T	T	T	T	K	T
S3_282826	G/A	3	282826	+	NA	NA	NA	NA	NA	NA	N	G	G	R	G	G	R	A	G	G	R	G	G	G	N	G	G	R	G	G	G	G	A	G	G	R	R	R	G	R	G	N	A	G	R	G	A	R	G
S3_282935	A/T	3	282935	+	NA	NA	NA	NA	NA	NA	A	A	A	A	A	A	A	A	A	A	A	A	A	A	W	A	A	N	A	A	W	A	A	A	A	A	A	A	A	A	A	A	A	A	A	A	A	A	A
S3_285766	T/G	3	285766	+	NA	NA	NA	NA	NA	NA	K	T	T	K	K	T	K	K	K	T	K	T	K	T	G	T	T	K	T	T	K	T	K	K	T	K	K	K	T	K	T	T	K	T	K	T	K	K	K
S3_350678	A/C	3	350678	+	NA	NA	NA	NA	NA	NA	M	A	A	M	A	N	M	M	M	A	M	A	M	A	N	A	A	C	A	A	A	A	M	M	A	M	M	M	A	M	A	A	M	N	M	A	M	M	M
S3_410649	A/G	3	410649	+	NA	NA	NA	NA	NA	NA	R	A	A	R	G	A	G	R	G	A	R	A	R	A	A	A	A	R	A	A	R	A	R	R	A	R	R	R	A	R	A	A	R	R	R	A	R	R	R
S3_410761	T/C	3	410761	+	NA	NA	NA	NA	NA	NA	Y	T	T	Y	T	T	Y	Y	Y	T	Y	T	Y	T	T	T	T	Y	T	T	Y	T	Y	Y	T	Y	Y	Y	T	Y	T	T	Y	T	Y	T	Y	Y	Y
S3_451087	T/G	3	451087	+	NA	NA	NA	NA	NA	NA	T	T	T	T	T	T	T	T	T	T	K	T	K	T	T	T	T	K	T	T	T	T	T	T	T	T	T	T	T	T	T	T	T	T	T	T	T	T	K
S3_451195	G/C	3	451195	+	NA	NA	NA	NA	NA	NA	S	G	G	S	C	G	S	S	S	G	S	N	S	G	S	G	G	G	G	G	C	G	S	S	G	G	S	S	G	G	G	G	S	N	S	G	S	S	S
S3_452676	A/G	3	452676	+	NA	NA	NA	NA	NA	NA	N	A	A	R	A	A	R	R	R	A	R	A	R	A	G	A	A	R	A	A	R	A	R	R	A	R	R	R	A	N	A	A	R	A	R	A	R	R	R
S3_481569	A/G	3	481569	+	NA	NA	NA	NA	NA	NA	R	A	A	R	R	A	R	R	R	A	R	A	R	A	R	A	A	R	A	A	R	A	R	R	A	R	R	R	A	R	A	A	R	A	R	A	R	R	R
S3_494670	A/C	3	494670	+	NA	NA	NA	NA	NA	NA	M	A	A	M	N	N	M	M	M	A	M	A	M	A	A	A	A	M	A	A	M	A	M	M	A	M	A	M	A	M	A	A	M	A	M	A	M	M	M
S3_499503	T/C	3	499503	+	NA	NA	NA	NA	NA	NA	Y	T	T	Y	Y	T	Y	Y	Y	T	Y	T	Y	T	Y	T	T	Y	T	T	Y	T	Y	Y	T	Y	Y	Y	T	Y	T	T	Y	T	Y	T	Y	Y	Y
S3_518225	C/T	3	518225	+	NA	NA	NA	NA	NA	NA	C	C	C	C	C	C	C	C	Y	C	C	C	C	C	C	C	C	Y	C	C	C	C	C	C	C	C	C	C	C	Y	C	C	C	C	C	C	C	Y	Y
S3_564084	T/C	3	564084	+	NA	NA	NA	NA	NA	NA	Y	T	T	Y	T	T	Y	Y	Y	T	Y	T	Y	T	Y	T	T	Y	T	T	Y	T	Y	Y	T	Y	Y	Y	T	Y	T	T	Y	T	Y	T	Y	Y	Y
S3_601407	A/G	3	601407	+	NA	NA	NA	NA	NA	NA	R	A	A	R	N	A	R	R	R	A	R	A	R	A	A	A	A	R	A	A	R	A	R	R	A	R	R	R	A	G	A	A	R	A	R	A	R	A	R
S3_607107	A/G	3	607107	+	NA	NA	NA	NA	NA	NA	R	A	A	R	R	A	R	R	R	A	R	A	R	A	R	A	A	R	A	A	R	A	R	R	A	R	R	R	A	R	A	A	R	A	R	A	R	R	R
S3_611335	T/C	3	611335	+	NA	NA	NA	NA	NA	NA	C	T	T	Y	C	T	Y	Y	Y	T	Y	T	Y	T	T	T	T	Y	T	T	Y	T	Y	Y	T	Y	Y	Y	T	Y	T	T	Y	N	Y	T	Y	Y	Y
S3_628491	A/G	3	628491	+	NA	NA	NA	NA	NA	NA	R	A	A	R	R	A	R	R	R	A	R	A	R	A	A	A	A	R	A	A	R	A	R	R	A	R	R	R	A	R	A	A	R	A	R	A	R	R	R
S3_663463	C/T	3	663463	+	NA	NA	NA	NA	NA	NA	Y	Y	Y	Y	Y	Y	Y	Y	Y	Y	Y	Y	Y	Y	Y	Y	Y	Y	Y	Y	Y	Y	Y	Y	Y	Y	Y	Y	Y	Y	Y	Y	Y	Y	Y	Y	Y	Y	Y
S3_663589	A	3	663589	+	NA	NA	NA	NA	NA	NA	A	A	A	A	A	A	A	A	A	A	A	A	A	A	A	A	A	A	A	A	A	A	A	A	A	A	A	A	A	A	A	A	A	A	A	A	A	A	A
S3_705999	G/T	3	705999	+	NA	NA	NA	NA	NA	NA	K	G	G	K	K	G	K	K	K	G	K	G	K	G	G	G	G	G	G	G	K	G	K	K	G	K	K	K	G	K	G	G	K	G	K	G	K	K	K
S3_706108	A/T	3	706108	+	NA	NA	NA	NA	NA	NA	W	A	A	W	W	A	W	W	W	A	W	A	W	A	W	A	A	W	A	A	W	A	W	W	A	W	W	W	A	W	A	A	W	A	W	A	W	W	W
S3_710767	A/T	3	710767	+	NA	NA	NA	NA	NA	NA	A	A	A	W	T	A	W	T	W	A	W	A	W	A	A	A	A	A	A	A	T	A	W	W	A	W	W	W	A	W	A	A	W	A	W	A	T	W	W
S3_712319	C/G	3	712319	+	NA	NA	NA	NA	NA	NA	C	C	S	C	N	C	C	C	C	C	C	C	N	C	N	C	C	N	C	C	C	C	C	C	C	C	C	C	C	C	C	C	C	C	C	C	C	C	C
S3_712534	T/C	3	712534	+	NA	NA	NA	NA	NA	NA	Y	T	T	Y	C	N	Y	Y	C	T	Y	T	T	T	N	T	T	T	T	T	T	T	Y	Y	T	Y	Y	Y	T	Y	T	T	Y	T	Y	T	Y	Y	Y
S5_57612	A/C	5	57612	+	NA	NA	NA	NA	NA	NA	M	M	M	M	M	M	M	M	M	M	M	N	M	M	M	M	M	M	M	A	C	M	M	M	M	M	M	M	M	M	M	M	M	M	M	M	M	M	M
S5_98792	C/T	5	98792	+	NA	NA	NA	NA	NA	NA	C	Y	C	Y	C	N	Y	C	N	Y	Y	C	Y	Y	C	C	C	Y	Y	C	Y	C	Y	Y	C	Y	C	Y	C	T	C	C	C	C	C	Y	C	C	C
S5_166628	C/T	5	166628	+	NA	NA	NA	NA	NA	NA	N	C	C	C	Y	N	Y	C	Y	Y	Y	Y	Y	C	N	C	C	Y	C	T	Y	C	Y	C	C	C	Y	Y	N	C	C	C	C	C	Y	T	Y	C	C
S5_185143	C/T	5	185143	+	NA	NA	NA	NA	NA	NA	C	C	Y	C	C	C	C	C	C	C	C	C	C	C	C	C	C	C	C	C	C	C	C	C	C	C	C	C	C	C	C	C	C	C	C	C	C	C	C
S5_200502	C/T	5	200502	+	NA	NA	NA	NA	NA	NA	C	C	C	C	C	C	Y	C	Y	Y	Y	Y	Y	C	C	C	C	Y	C	Y	Y	C	Y	C	C	C	Y	Y	C	C	C	C	C	C	Y	Y	Y	C	C
S5_226739	T/C	5	226739	+	NA	NA	NA	NA	NA	NA	T	T	T	T	N	T	Y	T	C	Y	Y	Y	Y	T	T	T	T	Y	T	Y	Y	T	Y	T	T	T	Y	Y	T	T	T	T	T	T	Y	Y	C	N	T
S5_265337	A/T	5	265337	+	NA	NA	NA	NA	NA	NA	A	A	A	A	N	A	A	A	A	A	A	A	A	A	A	A	A	A	A	A	A	A	A	A	A	A	A	A	A	A	A	A	A	A	A	A	A	A	A
S5_286060	T/C	5	286060	+	NA	NA	NA	NA	NA	NA	T	T	T	T	Y	T	Y	T	Y	Y	Y	Y	Y	T	T	T	T	Y	T	Y	Y	T	Y	T	T	T	Y	Y	T	T	T	T	T	T	Y	Y	Y	T	T
S5_287242	T/C	5	287242	+	NA	NA	NA	NA	NA	NA	T	T	Y	T	Y	T	Y	T	Y	Y	Y	Y	Y	T	T	T	T	Y	T	Y	Y	T	Y	T	T	T	Y	Y	T	T	T	T	T	T	Y	Y	Y	T	T
S5_334960	A/G	5	334960	+	NA	NA	NA	NA	NA	NA	A	A	A	A	A	A	A	A	A	A	A	A	A	A	A	A	A	A	A	A	A	A	A	A	A	A	A	A	A	A	A	A	A	A	A	A	A	A	A
S5_335077	C/T	5	335077	+	NA	NA	NA	NA	NA	NA	C	C	C	C	C	N	C	C	C	C	C	C	C	C	C	C	C	C	C	C	C	C	C	C	C	C	C	N	C	N	C	C	C	C	C	C	C	C	C
S5_335718	A/T	5	335718	+	NA	NA	NA	NA	NA	NA	A	A	A	A	A	N	A	A	A	A	A	A	A	A	N	A	A	A	A	A	A	A	A	A	A	A	A	A	A	A	A	A	A	A	A	A	A	A	A
S5_335937	C/T	5	335937	+	NA	NA	NA	NA	NA	NA	C	C	C	C	Y	C	Y	C	Y	Y	Y	Y	Y	C	C	C	C	Y	C	Y	Y	C	Y	C	C	C	Y	Y	C	C	C	C	C	C	Y	Y	Y	C	C
S5_336130	T/A	5	336130	+	NA	NA	NA	NA	NA	NA	T	T	T	T	A	T	W	T	W	A	W	W	W	N	T	T	T	W	T	W	W	T	W	T	T	T	W	W	T	T	T	T	T	T	W	W	W	T	T
S5_339064	G/T	5	339064	+	NA	NA	NA	NA	NA	NA	K	G	G	K	K	K	K	G	K	G	K	G	K	G	K	K	G	K	K	K	K	K	G	G	K	K	G	G	K	G	K	K	K	K	G	G	K	G	K
S5_344959	T/A	5	344959	+	NA	NA	NA	NA	NA	NA	T	T	T	T	T	T	W	T	W	W	W	W	W	T	T	T	T	W	T	W	W	T	W	T	T	T	W	W	T	T	T	T	T	T	W	W	W	T	T
S5_396000	A/T	5	396000	+	NA	NA	NA	NA	NA	NA	A	A	N	A	N	A	W	A	W	W	W	A	W	A	N	N	N	T	A	W	W	A	W	A	A	A	W	T	A	A	A	A	A	A	W	W	T	A	A
S5_439674	T/C	5	439674	+	NA	NA	NA	NA	NA	NA	T	T	T	T	N	T	T	T	T	T	T	T	T	T	T	T	T	T	T	T	T	T	T	T	T	T	T	T	T	T	T	T	T	T	T	T	T	T	T
S5_456221	G/A	5	456221	+	NA	NA	NA	NA	NA	NA	G	G	G	G	G	N	G	G	G	G	G	G	G	G	N	N	G	G	G	G	G	G	G	G	G	G	G	G	N	G	G	G	G	G	G	G	G	G	G
S5_462981	A/G	5	462981	+	NA	NA	NA	NA	NA	NA	A	A	A	A	A	A	R	A	R	R	R	R	A	A	N	A	A	N	A	R	R	A	R	A	A	A	R	R	A	A	A	A	A	N	R	R	R	A	A
S5_470257	G/C	5	470257	+	NA	NA	NA	NA	NA	NA	G	G	G	G	G	N	S	G	S	S	S	S	S	G	N	G	G	S	G	S	G	G	S	G	G	G	C	C	G	N	G	G	G	G	S	S	S	G	G
S5_470357	C/T	5	470357	+	NA	NA	NA	NA	NA	NA	N	C	C	C	T	N	Y	C	Y	T	Y	Y	Y	C	N	N	C	N	C	Y	C	C	Y	C	C	C	Y	Y	C	C	C	C	C	C	Y	Y	Y	C	C
S5_512747	A/G	5	512747	+	NA	NA	NA	NA	NA	NA	A	A	A	A	A	A	A	A	A	A	A	A	A	A	N	A	A	A	A	A	A	A	A	A	A	A	A	A	A	A	A	A	A	A	A	A	A	A	A
S5_635148	A/G	5	635148	+	NA	NA	NA	NA	NA	NA	A	A	A	A	A	A	R	A	R	R	R	R	R	A	A	A	A	R	A	R	R	A	R	A	A	A	R	R	N	A	A	A	A	A	R	R	R	A	A
S5_651644	G/A	5	651644	+	NA	NA	NA	NA	NA	NA	G	G	G	G	R	G	R	G	R	R	R	R	R	G	G	G	G	R	G	R	R	G	R	G	G	G	R	R	G	G	G	G	G	G	R	R	R	G	G
S5_663575	C/T	5	663575	+	NA	NA	NA	NA	NA	NA	C	C	C	C	C	C	C	C	C	C	C	C	C	C	C	C	C	C	C	C	C	C	C	C	C	C	C	C	C	C	C	C	C	C	C	C	C	C	C
S5_670873	A/G	5	670873	+	NA	NA	NA	NA	NA	NA	N	A	A	A	N	A	R	A	G	G	G	G	R	A	A	A	A	G	A	G	G	A	G	A	A	A	R	R	A	A	A	A	A	N	G	G	G	A	A
S5_671033	G/A	5	671033	+	NA	NA	NA	NA	NA	NA	G	G	G	G	R	G	R	G	A	R	R	R	R	G	G	G	G	R	G	R	R	G	R	G	G	G	R	R	G	G	G	G	G	G	R	R	R	G	G
S5_704051	T/A	5	704051	+	NA	NA	NA	NA	NA	NA	T	T	T	T	N	T	W	T	W	W	W	A	W	T	N	T	T	T	T	W	W	T	W	T	T	T	W	N	T	T	T	T	T	T	W	W	W	T	T
S5_724700	G/T	5	724700	+	NA	NA	NA	NA	NA	NA	G	G	G	G	G	G	K	G	G	K	K	G	G	G	G	G	G	G	G	K	T	G	K	G	G	G	K	K	G	G	G	G	G	G	K	K	K	G	G
S5_725587	A/G	5	725587	+	NA	NA	NA	NA	NA	NA	A	A	A	A	N	A	G	A	R	G	R	A	R	A	N	A	A	G	A	R	R	A	R	A	A	A	A	R	A	N	A	N	A	N	R	R	G	A	A
S5_729050	C/A	5	729050	+	NA	NA	NA	NA	NA	NA	C	C	C	C	C	N	M	C	M	M	M	M	M	C	C	N	C	M	C	M	M	C	M	C	C	C	M	M	C	C	C	C	C	C	C	A	M	C	C
S5_757404	A/C	5	757404	+	NA	NA	NA	NA	NA	NA	A	A	A	A	M	A	M	A	M	M	M	M	M	A	A	A	A	M	A	M	M	A	M	A	A	A	M	M	A	A	A	A	A	A	M	M	M	A	A
S5_758532	T/G	5	758532	+	NA	NA	NA	NA	NA	NA	T	T	T	T	T	T	K	T	T	K	K	K	K	T	T	N	T	G	T	K	T	T	K	T	T	T	K	K	T	T	T	T	T	T	K	K	K	T	T
S5_760143	C/T	5	760143	+	NA	NA	NA	NA	NA	NA	C	C	C	C	Y	C	Y	C	Y	Y	Y	Y	Y	C	C	C	C	Y	C	Y	Y	C	Y	C	C	C	Y	Y	C	C	C	C	C	C	Y	Y	Y	C	C
S5_761136	T/C	5	761136	+	NA	NA	NA	NA	NA	NA	T	T	T	T	T	T	Y	T	Y	Y	Y	Y	Y	T	T	T	T	Y	T	Y	Y	T	Y	T	T	T	Y	Y	T	T	T	T	T	T	Y	Y	Y	T	T
S5_761260	A/G	5	761260	+	NA	NA	NA	NA	NA	NA	A	A	A	A	N	N	R	A	R	N	R	A	A	A	N	A	A	R	A	R	G	A	R	A	A	A	R	R	A	A	A	A	A	A	R	R	R	A	A
S5_763732	A	5	763732	+	NA	NA	NA	NA	NA	NA	A	A	A	A	A	A	A	A	A	A	A	A	A	A	A	A	A	A	A	A	A	A	A	A	A	A	A	A	A	A	A	A	A	A	A	A	A	A	A
S5_763846	A/G	5	763846	+	NA	NA	NA	NA	NA	NA	A	A	A	A	R	A	R	A	R	R	R	R	R	A	A	A	A	A	A	R	R	A	R	A	A	A	R	R	A	A	A	A	A	A	R	R	R	A	A
S5_798132	T/G	5	798132	+	NA	NA	NA	NA	NA	NA	T	T	T	T	T	T	K	T	K	K	K	K	G	T	T	T	T	K	T	K	K	T	K	T	T	T	K	K	T	T	T	T	T	T	K	K	K	T	T
S5_804514	G/A	5	804514	+	NA	NA	NA	NA	NA	NA	G	G	G	G	G	G	R	G	G	A	R	R	R	G	G	N	G	R	G	R	R	G	R	G	G	G	R	G	G	G	G	G	G	G	R	R	R	G	G
S5_821595	T/A	5	821595	+	NA	NA	NA	NA	NA	NA	T	T	T	T	N	N	W	T	W	W	W	W	W	N	T	T	T	W	T	W	A	T	W	T	T	T	W	T	N	T	T	T	T	T	W	W	W	T	T
S5_821695	C/T	5	821695	+	NA	NA	NA	NA	NA	NA	C	C	C	C	C	N	C	C	Y	C	Y	C	Y	C	N	C	C	T	C	C	Y	C	Y	C	C	C	T	T	C	C	C	C	C	C	Y	Y	Y	C	C
S5_821917	G/A	5	821917	+	NA	NA	NA	NA	NA	NA	G	G	G	G	G	G	A	G	G	R	R	G	A	G	N	G	G	N	N	R	G	G	R	N	N	G	G	G	N	G	G	G	G	G	R	R	A	G	G
S5_838235	A/G	5	838235	+	NA	NA	NA	NA	NA	NA	A	A	A	A	G	A	A	A	A	A	A	A	A	A	A	A	A	A	A	A	A	A	A	A	A	A	A	A	A	A	A	A	A	A	A	A	A	A	A
S5_848886	G/A	5	848886	+	NA	NA	NA	NA	NA	NA	G	G	G	G	R	G	R	G	R	R	R	A	R	G	G	G	G	R	G	R	R	G	R	G	G	G	R	R	G	G	G	G	G	G	R	R	R	G	G
S5_849095	G/A	5	849095	+	NA	NA	NA	NA	NA	NA	G	G	G	G	G	G	R	G	R	R	R	G	G	G	N	G	G	R	G	R	G	G	R	G	G	G	R	R	G	G	G	G	G	G	R	R	A	G	G
S5_869773	A/G	5	869773	+	NA	NA	NA	NA	NA	NA	A	A	R	A	R	A	R	A	R	R	R	R	R	A	A	A	A	R	A	R	R	A	R	A	A	A	R	R	A	A	A	A	A	A	R	R	R	A	A
S5_884112	A/C	5	884112	+	NA	NA	NA	NA	NA	NA	N	A	A	A	A	A	M	A	C	M	M	N	M	A	A	A	A	M	A	M	M	A	M	A	A	A	M	A	N	A	A	A	A	A	A	M	M	A	A
S5_895983	A/C	5	895983	+	NA	NA	NA	NA	NA	NA	A	A	A	A	M	N	M	A	M	M	M	M	M	A	A	A	A	C	A	M	M	A	M	A	A	A	M	M	A	A	A	A	A	A	M	M	C	A	A
S5_958552	A/G	5	958552	+	NA	NA	NA	NA	NA	NA	A	A	A	A	A	A	R	A	R	R	R	R	R	A	A	A	A	R	A	R	R	A	R	A	A	A	R	R	A	A	A	A	A	A	R	R	R	A	A
S5_969674	A/T	5	969674	+	NA	NA	NA	NA	NA	NA	A	A	A	A	W	A	W	A	W	W	W	W	W	A	A	A	A	W	A	W	W	A	W	A	A	A	W	W	A	A	A	A	A	A	W	W	W	A	A
S5_1016079	G/A	5	1016079	+	NA	NA	NA	NA	NA	NA	G	G	G	G	R	G	R	G	R	R	R	R	R	G	G	G	G	R	G	R	R	G	R	G	G	G	R	R	G	G	G	G	G	G	R	R	R	G	G
S5_1017588	A/G	5	1017588	+	NA	NA	NA	NA	NA	NA	A	A	A	A	A	A	R	A	R	R	R	R	R	A	A	A	A	R	A	R	R	A	R	A	A	A	R	R	A	A	A	A	A	A	R	R	R	A	A
S5_1028168	T/C	5	1028168	+	NA	NA	NA	NA	NA	NA	T	T	T	T	C	T	Y	T	Y	N	Y	T	C	T	T	N	T	Y	T	Y	Y	T	T	T	T	T	C	C	N	N	T	T	T	N	Y	Y	Y	T	T
S5_1028306	G/T/A	5	1028306	+	NA	NA	NA	NA	NA	NA	G	G	G	G	N	N	K	G	T	T	K	K	T	G	G	G	G	T	G	K	K	G	K	G	G	G	K	G	N	G	G	G	G	G	K	K	K	G	G
S5_1034917	C/T	5	1034917	+	NA	NA	NA	NA	NA	NA	C	Y	C	C	C	C	Y	Y	C	Y	Y	Y	Y	Y	Y	C	C	Y	Y	Y	Y	C	C	Y	C	C	C	C	Y	Y	C	Y	C	Y	Y	C	Y	C	C
S5_1061304	C/T	5	1061304	+	NA	NA	NA	NA	NA	NA	C	C	C	C	Y	C	C	C	C	C	C	C	C	C	C	C	C	C	C	C	C	C	C	C	C	C	C	C	C	C	C	C	C	C	C	C	C	C	C
S5_1120217	T/C	5	1120217	+	NA	NA	NA	NA	NA	NA	T	T	T	T	T	N	Y	T	Y	T	Y	C	Y	T	N	N	T	Y	T	Y	Y	T	Y	T	T	T	Y	Y	T	N	T	T	T	T	C	Y	Y	T	T
S5_1120389	G/A	5	1120389	+	NA	NA	NA	NA	NA	NA	G	G	G	G	R	G	G	G	G	G	G	G	G	G	G	G	G	G	G	G	G	G	G	G	G	G	G	G	G	G	G	G	G	G	G	G	G	G	G
S5_1122629	G/A	5	1122629	+	NA	NA	NA	NA	NA	NA	N	G	G	G	R	N	R	G	R	R	A	R	R	G	G	G	G	A	N	R	A	G	A	G	G	G	R	R	N	G	G	G	G	G	G	R	R	G	G
S5_1134776	T/C	5	1134776	+	NA	NA	NA	NA	NA	NA	N	T	T	T	C	N	C	T	Y	C	C	C	Y	T	T	T	T	Y	N	C	C	T	Y	T	T	T	Y	Y	T	T	T	T	N	T	C	C	C	T	T
S5_1185698	A/G	5	1185698	+	NA	NA	NA	NA	NA	NA	A	A	A	A	A	A	A	A	A	A	A	A	A	A	A	A	A	A	A	A	A	A	A	A	A	A	A	A	A	A	A	A	A	A	A	A	A	A	A
S5_1191642	C/G	5	1191642	+	NA	NA	NA	NA	NA	NA	C	C	C	C	C	C	S	C	S	S	S	S	S	C	N	C	C	S	C	S	G	C	S	C	C	C	S	S	C	C	C	C	C	C	S	S	S	C	C
S5_1215753	C/T	5	1215753	+	NA	NA	NA	NA	NA	NA	C	C	C	C	T	N	Y	C	T	T	Y	Y	Y	C	N	C	C	N	C	Y	Y	C	Y	C	C	C	Y	C	C	C	C	C	C	C	C	Y	N	C	C
S5_1215881	A/G	5	1215881	+	NA	NA	NA	NA	NA	NA	A	A	A	A	N	N	R	A	G	A	R	A	A	A	N	N	A	A	A	R	G	A	R	A	A	A	R	R	A	A	A	A	N	N	R	A	R	A	A
S5_1223243	T/C	5	1223243	+	NA	NA	NA	NA	NA	NA	T	T	T	T	N	T	T	T	Y	Y	Y	Y	Y	T	T	T	T	C	T	Y	Y	T	Y	T	T	T	C	Y	T	N	T	T	T	N	Y	Y	C	N	T
S5_1223413	T/A	5	1223413	+	NA	NA	NA	NA	NA	NA	T	T	T	T	N	T	A	T	T	W	W	A	N	T	N	T	T	T	T	W	N	T	W	T	T	T	A	W	T	T	T	T	T	T	W	T	A	T	T
S5_1224799	G/A	5	1224799	+	NA	NA	NA	NA	NA	NA	G	G	G	G	G	G	R	G	R	R	R	R	R	G	G	G	G	R	G	R	R	G	R	G	G	G	R	R	N	G	G	G	G	G	R	R	R	G	G
S5_1256812	T/C	5	1256812	+	NA	NA	NA	NA	NA	NA	T	T	T	T	Y	T	Y	T	T	Y	Y	Y	Y	T	T	T	T	Y	T	Y	Y	T	Y	T	T	T	Y	Y	T	T	T	T	T	T	Y	Y	Y	T	T
S5_1257307	T/A	5	1257307	+	NA	NA	NA	NA	NA	NA	T	T	W	T	N	N	W	T	T	W	W	A	A	T	T	T	T	W	T	W	W	T	W	T	T	T	W	W	T	T	T	T	T	T	A	T	T	T	T
S5_1257427	A/G	5	1257427	+	NA	NA	NA	NA	NA	NA	A	A	A	A	N	A	G	A	R	R	G	R	R	A	A	N	A	G	A	A	G	A	R	A	A	A	R	A	A	A	A	A	A	A	R	R	R	A	A
S5_1266155	T/A	5	1266155	+	NA	NA	NA	NA	NA	NA	T	T	T	T	T	T	T	T	W	T	T	W	W	T	T	T	T	W	T	T	T	T	T	T	T	T	W	T	T	T	T	T	T	T	T	W	T	T	T
S5_1304009	G/C	5	1304009	+	NA	NA	NA	NA	NA	NA	N	G	G	G	C	G	S	G	C	C	S	S	C	G	N	G	G	S	G	S	C	G	S	G	G	G	S	C	G	G	G	G	G	N	C	C	G	G	G
S5_1318180	T/G	5	1318180	+	NA	NA	NA	NA	NA	NA	T	T	T	T	T	T	K	T	K	K	K	K	K	T	T	T	T	K	T	K	K	T	K	T	T	T	K	K	T	T	T	T	T	T	K	K	T	T	T
S5_1359172	T/A	5	1359172	+	NA	NA	NA	NA	NA	NA	N	T	T	T	N	T	T	T	T	T	T	T	T	T	T	N	T	T	T	T	T	T	T	T	T	T	T	T	T	T	T	T	N	T	T	T	T	T	T
S5_1359288	T/A	5	1359288	+	NA	NA	NA	NA	NA	NA	T	T	T	T	W	T	W	T	W	W	W	W	W	T	T	T	T	T	T	W	W	T	W	T	T	T	T	W	T	T	T	T	T	T	W	W	T	T	T
S5_1362152	C/T	5	1362152	+	NA	NA	NA	NA	NA	NA	C	C	C	C	Y	C	C	C	C	C	C	C	C	C	C	C	C	C	C	C	C	C	C	C	C	C	C	C	C	C	C	C	C	C	C	C	C	C	C
S5_1362277	G/A	5	1362277	+	NA	NA	NA	NA	NA	NA	G	G	G	G	N	G	R	G	R	R	R	R	R	N	G	G	G	N	G	R	R	G	R	G	G	G	R	R	G	G	G	G	G	G	R	R	G	G	G
S5_1376385	T/A	5	1376385	+	NA	NA	NA	NA	NA	NA	T	T	T	T	W	T	T	T	T	T	T	T	T	T	T	T	T	T	T	T	T	T	T	T	T	T	T	T	T	T	T	T	T	T	T	T	T	T	T
S5_1388871	G/A	5	1388871	+	NA	NA	NA	NA	NA	NA	G	G	G	G	R	G	G	G	G	G	G	G	G	G	G	G	G	G	G	G	G	G	G	G	G	G	G	G	G	G	G	G	G	G	G	G	G	G	G
S5_1399914	C/A	5	1399914	+	NA	NA	NA	NA	NA	NA	C	C	C	C	N	C	C	C	M	C	C	C	C	C	C	C	C	C	C	C	C	C	C	C	M	C	C	C	C	C	C	C	C	C	C	C	C	C	C
S5_1437413	C/A	5	1437413	+	NA	NA	NA	NA	NA	NA	C	C	C	C	N	C	M	C	M	C	M	M	C	C	N	C	C	C	C	M	M	C	M	C	C	C	M	M	N	N	C	C	C	C	M	M	C	C	C
S5_1437556	C/T	5	1437556	+	NA	NA	NA	NA	NA	NA	C	C	C	C	T	C	Y	C	C	C	Y	C	C	C	N	C	C	Y	C	Y	C	C	Y	C	C	C	Y	Y	C	N	C	C	C	C	Y	Y	C	C	C
S5_1438500	C/T	5	1438500	+	NA	NA	NA	NA	NA	NA	C	C	C	C	C	C	Y	C	Y	Y	Y	Y	Y	C	C	C	C	Y	C	Y	Y	C	Y	C	C	C	Y	Y	C	C	C	C	C	C	Y	Y	C	C	C
S5_1440259	T/A	5	1440259	+	NA	NA	NA	NA	NA	NA	N	T	T	T	T	N	W	T	W	T	W	W	W	T	N	T	T	T	T	W	W	T	W	T	T	T	A	A	T	T	T	T	N	T	W	W	N	N	T
S5_1440417	T/A	5	1440417	+	NA	NA	NA	NA	NA	NA	T	T	T	T	W	T	W	T	W	W	W	W	W	T	T	T	T	W	T	W	W	T	W	T	T	T	W	W	T	T	T	T	T	T	W	W	T	T	T
S5_1444291	T/C	5	1444291	+	NA	NA	NA	NA	NA	NA	T	T	T	T	Y	T	T	T	T	T	T	T	T	T	N	T	T	T	T	T	T	T	T	T	T	T	T	T	T	T	T	T	T	T	T	T	T	T	T
S5_1447745	T/C	5	1447745	+	NA	NA	NA	NA	NA	NA	T	T	T	T	C	T	Y	T	Y	T	Y	Y	Y	T	T	T	T	Y	T	Y	Y	T	Y	T	T	T	Y	Y	T	T	T	T	T	T	Y	Y	T	T	T
S5_1448544	A/G	5	1448544	+	NA	NA	NA	NA	NA	NA	A	A	A	A	N	N	A	A	A	A	R	A	A	A	A	A	A	A	A	R	A	A	R	A	A	A	A	N	A	A	A	A	A	A	A	A	R	A	A
S5_1453102	C/T	5	1453102	+	NA	NA	NA	NA	NA	NA	C	C	C	C	Y	C	Y	C	Y	Y	Y	Y	Y	C	C	C	C	Y	C	Y	Y	C	Y	C	C	C	Y	Y	C	C	C	C	C	C	Y	Y	C	C	C
S5_1453208	A/T	5	1453208	+	NA	NA	NA	NA	NA	NA	A	A	A	A	A	A	A	A	A	A	A	A	A	A	N	A	A	A	A	A	A	A	A	A	A	A	A	A	A	A	A	A	A	A	A	A	A	A	A
S5_1516268	A	5	1516268	+	NA	NA	NA	NA	NA	NA	A	A	A	A	A	A	A	A	A	A	A	A	A	A	A	A	A	A	A	A	A	A	A	A	A	A	A	A	A	A	A	A	A	A	A	A	A	A	A
S5_1534145	C/G	5	1534145	+	NA	NA	NA	NA	NA	NA	C	C	C	C	S	C	C	C	C	C	C	C	C	C	C	C	C	C	C	C	C	C	C	C	C	C	C	C	C	C	C	C	C	C	C	C	C	C	C
S5_1556798	G/A	5	1556798	+	NA	NA	NA	NA	NA	NA	G	G	N	G	R	G	R	G	A	G	R	A	R	G	G	G	G	R	G	R	A	G	R	G	G	G	G	R	G	G	G	G	G	G	R	A	G	G	G
S5_1558535	G/A	5	1558535	+	NA	NA	NA	NA	NA	NA	G	G	G	G	R	G	G	G	G	G	G	G	G	G	G	G	G	G	G	G	G	G	G	G	G	G	G	G	G	G	G	G	G	G	G	G	G	G	G
S5_1562111	T/C	5	1562111	+	NA	NA	NA	NA	NA	NA	T	T	T	T	N	N	Y	T	Y	Y	Y	Y	Y	T	T	T	T	T	T	Y	Y	T	Y	T	T	T	Y	Y	T	T	T	T	T	T	Y	Y	T	T	T
S5_1562390	G/A	5	1562390	+	NA	NA	NA	NA	NA	NA	G	G	G	G	G	G	G	G	G	G	G	G	G	G	N	G	G	G	G	G	G	G	G	G	G	G	G	G	G	G	G	G	G	G	G	G	G	G	G
S5_1564464	A	5	1564464	+	NA	NA	NA	NA	NA	NA	A	A	A	A	A	A	A	A	A	A	A	A	A	A	A	A	A	A	A	A	A	A	A	A	A	A	A	A	A	A	A	A	A	A	A	A	A	A	A
S5_1565473	T/C	5	1565473	+	NA	NA	NA	NA	NA	NA	N	T	T	T	T	T	Y	T	Y	Y	Y	Y	Y	T	N	T	T	C	T	Y	Y	T	Y	T	T	T	T	Y	T	T	T	T	T	T	Y	Y	T	T	T
S5_1569067	C/T	5	1569067	+	NA	NA	NA	NA	NA	NA	Y	Y	Y	Y	C	Y	Y	Y	C	T	Y	Y	Y	Y	C	Y	Y	T	Y	Y	Y	Y	Y	Y	Y	Y	C	Y	C	Y	Y	Y	Y	C	Y	Y	Y	Y	Y
S5_1598749	G/A	5	1598749	+	NA	NA	NA	NA	NA	NA	G	G	G	G	A	G	R	G	R	R	R	R	R	G	N	G	G	R	G	R	R	G	R	G	G	G	R	R	G	G	G	G	G	G	R	R	G	N	G
S5_1598879	A/G	5	1598879	+	NA	NA	NA	NA	NA	NA	A	A	A	A	A	A	A	A	A	A	A	A	A	A	A	A	A	A	A	A	A	A	A	A	A	A	A	A	A	A	A	A	A	A	A	A	A	A	A
S5_1604072	T/G	5	1604072	+	NA	NA	NA	NA	NA	NA	N	T	T	T	N	N	K	T	N	K	K	K	K	T	N	T	T	T	T	G	T	T	K	T	T	T	T	N	T	T	T	N	T	T	K	T	T	T	T
S5_1613835	G/A	5	1613835	+	NA	NA	NA	NA	NA	NA	N	G	G	G	N	G	N	G	G	G	G	G	G	G	G	G	G	G	G	G	G	G	G	G	G	G	G	G	G	G	G	G	G	G	G	G	G	G	G
S5_1613957	A/T	5	1613957	+	NA	NA	NA	NA	NA	NA	A	A	A	A	A	A	A	A	A	A	A	A	A	A	N	N	A	A	A	A	A	A	A	A	A	A	A	A	A	A	A	A	A	A	A	A	A	A	A
S5_1687115	T/A	5	1687115	+	NA	NA	NA	NA	NA	NA	T	T	T	T	W	T	W	T	W	N	W	W	W	T	T	T	T	T	T	W	W	T	W	T	T	T	W	W	T	T	T	T	T	T	T	W	T	T	T
S5_1718816	C/T	5	1718816	+	NA	NA	NA	NA	NA	NA	C	C	C	C	Y	N	Y	C	Y	Y	Y	Y	T	C	C	C	C	Y	C	Y	C	C	Y	C	C	C	Y	N	C	C	C	C	C	C	C	Y	C	C	C
S5_1748828	G/A	5	1748828	+	NA	NA	NA	NA	NA	NA	G	G	G	G	N	G	R	G	R	R	R	R	R	G	N	G	G	A	G	R	R	G	R	G	G	G	R	R	G	G	G	G	G	G	G	R	G	G	G
S5_1813805	A/G	5	1813805	+	NA	NA	NA	NA	NA	NA	A	A	A	A	R	A	R	A	R	R	R	R	R	A	A	A	A	R	A	R	R	A	R	A	A	A	R	R	A	A	A	A	A	A	A	R	A	A	A
S5_1850548	T/C	5	1850548	+	NA	NA	NA	NA	NA	NA	T	T	T	T	N	T	N	T	C	C	Y	T	Y	T	N	T	T	T	T	Y	T	T	Y	T	T	T	Y	Y	T	N	T	T	T	T	T	Y	T	T	T
S5_1891804	C/T	5	1891804	+	NA	NA	NA	NA	NA	NA	C	C	C	C	Y	C	C	C	C	C	C	C	C	C	C	C	C	Y	C	C	Y	C	C	C	C	C	C	C	C	C	C	C	C	C	C	C	C	C	C
S5_1894697	A/T	5	1894697	+	NA	NA	NA	NA	NA	NA	A	A	W	A	T	A	W	A	W	W	W	T	W	A	N	A	A	W	A	W	W	A	W	A	A	A	W	W	A	A	A	A	A	A	A	W	A	A	A
S5_1895324	T/C	5	1895324	+	NA	NA	NA	NA	NA	NA	T	T	T	T	Y	N	T	T	T	T	T	T	T	T	N	T	T	N	T	T	T	T	T	T	T	T	T	T	T	T	T	T	T	T	T	T	T	T	T
S5_1899626	A/T	5	1899626	+	NA	NA	NA	NA	NA	NA	N	A	A	A	N	A	W	A	W	T	W	W	W	A	A	A	A	W	A	W	W	A	W	A	A	A	W	T	A	A	A	A	A	A	A	W	A	A	A
S5_1920862	A/G	5	1920862	+	NA	NA	NA	NA	NA	NA	A	A	A	A	A	A	R	A	R	R	R	R	R	A	A	A	A	R	A	R	R	A	R	A	A	A	R	R	A	A	A	A	A	A	A	R	A	A	A
S5_1946668	A/C	5	1946668	+	NA	NA	NA	NA	NA	NA	A	A	A	A	N	A	A	A	A	A	M	C	C	A	N	A	A	N	A	M	C	A	M	A	A	A	A	M	A	A	A	A	A	A	A	A	A	A	A
S5_1989583	T/C	5	1989583	+	NA	NA	NA	NA	NA	NA	T	T	T	T	T	T	T	T	T	T	T	T	T	T	T	N	T	Y	T	T	Y	T	T	T	T	T	T	T	N	N	T	T	T	T	T	T	T	T	T
S5_1991593	T/C	5	1991593	+	NA	NA	NA	NA	NA	NA	T	T	T	T	C	T	Y	T	Y	Y	Y	Y	Y	T	T	T	T	Y	T	Y	Y	T	Y	T	T	T	C	Y	N	T	T	T	T	T	T	Y	T	T	T
S5_2005009	T/C	5	2005009	+	NA	NA	NA	NA	NA	NA	T	T	T	T	Y	T	T	T	T	T	T	T	T	T	T	T	T	Y	T	T	Y	T	T	T	T	T	T	T	T	T	T	T	T	T	T	T	T	T	T
S5_2016461	A/G	5	2016461	+	NA	NA	NA	NA	NA	NA	A	A	A	A	N	A	R	A	G	R	R	G	R	A	A	A	A	R	A	R	R	A	R	A	A	A	R	R	A	A	A	A	A	A	A	R	A	A	A
S5_2025659	A/G	5	2025659	+	NA	NA	NA	NA	NA	NA	A	A	A	A	A	A	R	A	R	R	R	R	R	A	A	A	A	A	A	R	R	A	R	A	A	A	R	R	A	A	A	A	A	A	A	R	A	A	A
S5_2025796	A/T	5	2025796	+	NA	NA	NA	NA	NA	NA	A	A	A	A	A	A	W	A	W	W	W	W	W	A	A	A	A	A	A	W	W	A	W	A	A	A	W	W	A	A	A	A	A	A	A	W	A	A	A
S5_2032809	T/C	5	2032809	+	NA	NA	NA	NA	NA	NA	T	T	T	T	Y	T	Y	T	Y	Y	Y	Y	Y	T	T	T	T	Y	T	Y	Y	T	Y	T	T	T	Y	Y	T	T	T	T	T	T	T	Y	T	T	T
S5_2055553	A/G	5	2055553	+	NA	NA	NA	NA	NA	NA	A	A	A	A	N	A	G	A	G	N	A	A	A	A	N	A	A	R	A	R	N	A	R	A	A	A	A	G	A	A	A	A	A	A	A	R	A	A	A
S5_2055680	T/C	5	2055680	+	NA	NA	NA	NA	NA	NA	N	T	T	T	C	N	T	T	N	Y	C	T	Y	T	T	T	T	N	T	Y	N	T	Y	T	T	T	Y	Y	T	T	T	T	T	T	T	Y	T	T	T
S5_2125056	C/G	5	2125056	+	NA	NA	NA	NA	NA	NA	C	C	C	C	C	C	S	C	S	S	S	S	S	C	C	C	C	C	C	S	C	C	S	C	C	C	S	S	C	C	C	C	C	C	C	S	C	C	C
S5_2125211	G/T	5	2125211	+	NA	NA	NA	NA	NA	NA	G	G	G	G	G	G	K	G	K	T	K	K	G	G	N	G	G	K	G	K	K	G	T	G	G	G	T	K	G	G	G	N	G	G	G	K	G	G	G
S5_2125983	T/C	5	2125983	+	NA	NA	NA	NA	NA	NA	T	T	T	T	T	T	T	T	T	T	T	T	T	T	T	T	T	T	T	T	T	T	T	T	T	T	T	T	T	T	T	T	T	T	T	T	T	T	T
S5_2127569	G/A	5	2127569	+	NA	NA	NA	NA	NA	NA	G	G	G	G	R	G	R	G	R	R	R	R	G	G	G	G	G	G	G	R	R	G	R	G	G	G	R	R	G	G	G	G	G	G	G	R	G	G	G
S5_2127720	C/T	5	2127720	+	NA	NA	NA	NA	NA	NA	C	C	N	C	N	C	Y	C	Y	Y	Y	C	Y	C	N	C	C	Y	C	Y	Y	C	Y	C	C	C	T	Y	C	N	C	C	C	C	C	Y	C	C	C
S5_2128962	G/T	5	2128962	+	NA	NA	NA	NA	NA	NA	G	G	G	G	K	G	K	G	K	K	K	K	K	G	G	G	G	T	G	K	K	G	K	G	G	G	K	K	G	G	G	G	G	G	G	K	G	G	G
S5_2147521	T/C	5	2147521	+	NA	NA	NA	NA	NA	NA	T	T	T	T	C	T	C	T	T	T	T	T	Y	T	N	T	T	T	T	Y	Y	T	Y	T	T	T	Y	C	T	T	T	T	T	T	T	Y	T	T	T
S5_2147692	A/C	5	2147692	+	NA	NA	NA	NA	NA	NA	A	A	A	A	A	A	M	A	A	M	M	M	M	A	N	A	A	M	A	M	M	A	C	A	A	A	M	A	A	A	A	A	A	N	A	M	A	A	A
S5_2159503	T/A	5	2159503	+	NA	NA	NA	NA	NA	NA	T	T	T	T	N	T	W	T	W	W	W	W	W	T	T	T	T	A	T	W	W	T	W	T	T	T	W	W	T	T	T	T	T	T	T	W	T	T	T
S5_2163863	T/C	5	2163863	+	NA	NA	NA	NA	NA	NA	T	T	Y	T	N	T	Y	T	Y	Y	Y	C	Y	T	T	T	T	Y	T	Y	Y	T	Y	T	T	T	Y	Y	T	T	T	T	T	T	T	Y	T	T	T
S5_2180318	G/A	5	2180318	+	NA	NA	NA	NA	NA	NA	G	G	G	G	G	G	R	G	R	R	R	R	R	G	G	G	G	R	G	R	N	G	R	G	G	G	R	R	G	G	G	G	G	G	G	R	G	G	G
S5_2193721	G/A	5	2193721	+	NA	NA	NA	NA	NA	NA	N	G	G	G	A	G	A	G	R	R	R	R	R	N	N	G	G	R	G	A	R	G	R	G	G	G	A	A	G	G	G	G	G	G	G	A	G	G	G
S5_2201250	T/C	5	2201250	+	NA	NA	NA	NA	NA	NA	T	T	T	T	C	T	T	T	Y	T	C	C	Y	T	N	T	T	C	T	Y	T	T	Y	T	T	T	Y	Y	T	T	T	T	T	T	T	Y	T	T	T
S5_2216816	C/G	5	2216816	+	NA	NA	NA	NA	NA	NA	C	C	C	C	S	C	S	C	S	S	S	S	S	C	C	C	C	S	C	S	S	C	S	C	C	C	S	S	C	C	C	C	C	C	C	S	C	C	C
S5_2219567	T/C	5	2219567	+	NA	NA	NA	NA	NA	NA	T	T	T	T	T	T	Y	T	Y	Y	Y	Y	Y	T	T	T	T	T	T	Y	Y	T	Y	T	T	T	T	Y	T	T	T	T	T	T	T	Y	T	T	T
S5_2248627	A/T	5	2248627	+	NA	NA	NA	NA	NA	NA	A	A	A	A	W	A	W	A	W	W	W	W	W	A	A	W	A	W	A	W	W	A	W	A	A	A	W	W	A	A	A	A	A	A	A	W	A	A	A
S5_2262201	T/G	5	2262201	+	NA	NA	NA	NA	NA	NA	T	T	T	T	N	T	K	T	K	K	K	K	K	T	T	K	T	T	T	K	T	T	K	T	T	T	K	G	N	T	T	T	N	T	T	K	T	T	T
S5_2262588	T/C	5	2262588	+	NA	NA	NA	NA	NA	NA	T	T	T	T	N	T	Y	T	Y	C	Y	Y	Y	T	N	T	T	Y	T	Y	Y	T	Y	T	T	T	Y	Y	T	T	T	T	T	T	T	Y	T	T	T
S5_2263255	G/A	5	2263255	+	NA	NA	NA	NA	NA	NA	G	G	N	G	A	G	R	G	R	R	R	R	A	G	G	R	G	G	G	A	N	G	R	G	G	G	R	G	G	G	G	G	G	G	G	R	G	G	G
S5_2298961	C/T	5	2298961	+	NA	NA	NA	NA	NA	NA	C	C	C	C	N	C	Y	C	C	Y	Y	C	Y	C	C	Y	C	Y	C	Y	Y	C	Y	C	C	C	Y	Y	C	C	C	C	C	C	C	C	C	C	C
S5_2300122	C/T	5	2300122	+	NA	NA	NA	NA	NA	NA	C	C	C	C	Y	C	Y	C	Y	Y	Y	Y	Y	C	C	Y	C	Y	C	Y	Y	C	Y	C	C	C	Y	Y	C	C	C	C	C	C	C	Y	C	C	C
S5_2300714	G/A	5	2300714	+	NA	NA	NA	NA	NA	NA	G	G	G	G	R	G	G	G	G	G	G	G	G	G	G	G	G	R	G	G	R	G	G	G	G	G	G	G	G	G	G	G	G	G	G	G	G	G	G
S5_2314249	C/T	5	2314249	+	NA	NA	NA	NA	NA	NA	C	C	C	C	Y	C	Y	C	Y	Y	Y	Y	Y	C	C	Y	C	Y	C	Y	Y	C	Y	C	C	C	Y	Y	C	C	C	C	C	C	C	Y	C	C	C
S5_2323537	G/A	5	2323537	+	NA	NA	NA	NA	NA	NA	G	G	R	G	N	G	R	G	R	R	R	R	R	G	G	R	G	R	G	R	R	G	R	G	G	G	R	R	G	G	G	G	G	N	G	R	G	G	G
S5_2324725	T/C	5	2324725	+	NA	NA	NA	NA	NA	NA	T	T	Y	T	T	T	T	T	T	N	T	N	T	T	N	T	T	T	T	T	T	T	T	T	T	T	T	T	T	T	T	T	T	T	T	T	T	T	T
S5_2338978	C/T	5	2338978	+	NA	NA	NA	NA	NA	NA	C	C	Y	C	C	C	C	C	C	C	C	C	N	C	N	C	C	C	C	C	C	C	N	C	C	C	C	C	C	C	C	C	C	N	C	C	C	C	C
S5_2356789	C/A	5	2356789	+	NA	NA	NA	NA	NA	NA	C	C	M	C	C	C	C	C	C	C	C	C	C	C	C	C	C	C	C	C	C	C	C	C	C	C	C	C	C	C	C	C	C	C	C	C	C	C	C
S5_2357676	G/A	5	2357676	+	NA	NA	NA	NA	NA	NA	G	G	G	G	G	N	R	G	G	G	R	G	R	G	N	G	G	G	G	R	G	G	R	G	G	G	R	R	G	G	G	G	G	G	G	G	G	G	G
S5_2357783	G/C	5	2357783	+	NA	NA	NA	NA	NA	NA	N	G	G	G	S	G	S	G	S	S	S	S	S	G	N	S	G	S	G	C	S	G	C	G	G	G	C	S	G	G	G	N	N	G	G	C	G	G	G
S5_2377878	C/G	5	2377878	+	NA	NA	NA	NA	NA	NA	C	C	C	C	C	C	S	C	S	S	S	S	S	C	C	S	C	C	C	S	S	C	S	C	C	C	S	S	C	C	C	C	C	C	C	S	C	C	C
S5_2414937	C/A	5	2414937	+	NA	NA	NA	NA	NA	NA	C	C	M	C	A	C	A	C	M	M	M	M	A	C	C	A	C	A	C	A	M	C	M	C	C	C	A	M	C	N	C	C	C	C	C	A	C	C	C
S5_2420152	T/C	5	2420152	+	NA	NA	NA	NA	NA	NA	T	T	T	T	T	T	Y	T	Y	T	Y	Y	Y	T	N	Y	T	Y	T	Y	Y	T	Y	T	T	T	Y	T	N	N	T	T	T	T	T	Y	T	T	T
S5_2429439	T/G	5	2429439	+	NA	NA	NA	NA	NA	NA	T	T	T	T	T	T	G	T	K	K	K	K	K	T	N	T	T	T	T	K	T	T	K	T	T	T	G	T	T	T	T	N	T	N	T	K	T	T	T
S5_2430018	C/T	5	2430018	+	NA	NA	NA	NA	NA	NA	C	C	C	C	C	C	Y	C	Y	Y	Y	Y	Y	C	C	Y	C	C	C	Y	Y	C	Y	C	C	C	Y	Y	C	C	C	C	C	C	C	Y	C	C	C
S5_2442357	A/G	5	2442357	+	NA	NA	NA	NA	NA	NA	A	A	R	A	A	A	A	A	A	A	A	A	A	A	A	A	A	A	A	A	A	A	A	A	A	A	A	A	A	A	A	A	A	N	A	A	A	A	A
S5_2442552	T/C	5	2442552	+	NA	NA	NA	NA	NA	NA	T	T	T	T	T	N	Y	T	Y	Y	Y	T	Y	T	N	T	T	N	T	Y	C	T	Y	T	T	T	Y	Y	T	T	T	T	T	T	T	T	T	T	T
S5_2443114	G/T	5	2443114	+	NA	NA	NA	NA	NA	NA	G	G	G	G	T	G	G	G	G	G	G	G	G	G	G	G	G	K	G	G	K	G	G	G	G	G	G	G	G	G	G	G	G	G	G	G	G	G	G
S5_2451570	T/A	5	2451570	+	NA	NA	NA	NA	NA	NA	T	T	T	T	W	T	T	T	T	T	T	T	T	T	T	T	T	W	T	T	W	T	T	T	T	T	T	T	T	T	T	T	T	T	T	T	T	T	T
S5_2453031	C/A	5	2453031	+	NA	NA	NA	NA	NA	NA	C	C	C	C	M	C	M	C	C	N	M	C	M	C	C	C	C	M	C	M	C	C	C	C	C	C	M	M	C	C	C	C	C	C	C	M	C	C	C
S5_2453131	G/C	5	2453131	+	NA	NA	NA	NA	NA	NA	G	G	G	G	G	N	G	G	G	G	G	G	G	G	G	G	G	N	G	G	C	G	G	G	G	G	G	G	G	G	G	G	G	G	G	G	G	G	G
S5_2453936	T/C	5	2453936	+	NA	NA	NA	NA	NA	NA	T	T	T	T	Y	T	Y	T	Y	Y	Y	Y	Y	T	T	Y	T	Y	T	Y	Y	T	Y	T	T	T	Y	Y	T	T	T	T	T	T	T	Y	T	T	T
S5_2455611	C/T	5	2455611	+	NA	NA	NA	NA	NA	NA	C	C	C	C	Y	C	C	C	C	C	C	C	C	C	C	C	C	N	C	C	Y	C	C	C	C	C	C	C	C	C	C	C	C	C	C	C	C	C	C
S5_2457324	G/A	5	2457324	+	NA	NA	NA	NA	NA	NA	G	G	G	G	N	G	G	G	G	G	G	G	G	G	N	G	G	R	G	G	R	G	G	G	G	G	G	G	N	G	G	G	G	G	G	G	G	G	G
S5_2475230	T/C	5	2475230	+	NA	NA	NA	NA	NA	NA	T	T	T	T	C	T	Y	T	Y	Y	Y	Y	Y	T	T	Y	T	Y	T	Y	Y	T	Y	T	T	T	Y	Y	T	T	T	T	T	T	T	Y	T	T	T
S5_2511185	A/G	5	2511185	+	NA	NA	NA	NA	NA	NA	A	A	A	A	R	A	R	A	R	G	R	R	R	A	N	R	A	N	A	R	R	A	R	A	A	A	N	R	N	A	A	A	A	A	A	R	A	A	A
S5_2511287	C/T	5	2511287	+	NA	NA	NA	NA	NA	NA	C	C	C	C	C	C	Y	C	Y	Y	Y	C	Y	C	C	C	C	C	C	Y	Y	C	Y	C	C	C	Y	Y	C	C	C	N	C	C	C	Y	C	C	C
S5_2519154	A/T	5	2519154	+	NA	NA	NA	NA	NA	NA	A	A	A	A	W	A	W	A	W	W	W	W	W	A	A	W	A	W	A	W	W	A	W	A	A	A	W	W	A	A	A	A	A	A	A	W	A	A	A
S5_2522183	A/T	5	2522183	+	NA	NA	NA	NA	NA	NA	A	A	A	A	W	A	W	A	W	W	W	W	W	A	A	W	A	W	A	W	W	A	W	A	A	A	W	W	A	A	A	A	A	A	A	W	A	A	A
S5_2524124	A/G/+/-	5	2524124	+	NA	NA	NA	NA	NA	NA	A	A	A	A	0	A	R	A	R	R	R	R	R	A	A	R	A	0	A	R	R	A	R	A	A	A	R	R	A	A	A	A	A	A	A	R	A	A	A
S5_2545081	G/A	5	2545081	+	NA	NA	NA	NA	NA	NA	G	G	G	G	A	G	A	G	R	R	A	N	R	G	G	N	G	A	G	R	R	G	R	G	G	G	G	R	G	G	G	G	G	G	G	R	G	G	G
S5_2565100	T/C	5	2565100	+	NA	NA	NA	NA	NA	NA	T	T	T	T	Y	T	T	T	T	T	T	T	T	T	T	T	T	Y	T	T	Y	T	T	T	T	T	T	T	T	T	T	T	T	T	T	T	T	T	T
S5_2576130	G/A	5	2576130	+	NA	NA	NA	NA	NA	NA	G	G	G	G	R	G	G	G	G	G	G	G	G	G	G	G	G	R	G	G	R	G	G	G	G	G	G	G	G	G	G	G	G	G	G	G	G	G	G
S5_2577501	T/C	5	2577501	+	NA	NA	NA	NA	NA	NA	T	T	T	T	T	T	Y	T	Y	T	Y	Y	Y	T	T	C	T	T	T	Y	Y	T	Y	T	T	T	Y	Y	T	T	T	T	T	T	T	Y	T	T	T
S5_2577613	T/A	5	2577613	+	NA	NA	NA	NA	NA	NA	T	T	T	T	W	T	T	T	T	T	T	T	T	T	T	T	T	W	T	T	T	T	T	T	T	T	T	T	T	T	T	T	T	T	T	T	T	T	T
S5_2583538	G/A	5	2583538	+	NA	NA	NA	NA	NA	NA	G	G	G	G	R	G	R	G	A	R	R	R	R	G	G	R	G	A	G	R	R	G	R	G	G	G	A	A	G	G	G	N	G	G	G	A	G	G	G
S5_2606316	T/A	5	2606316	+	NA	NA	NA	NA	NA	NA	T	T	T	T	T	T	W	T	W	W	A	W	W	T	T	W	T	W	T	W	W	T	W	T	T	T	W	W	T	T	T	T	T	T	T	W	T	T	T
S5_2611697	C/A	5	2611697	+	NA	NA	NA	NA	NA	NA	C	C	C	C	C	C	M	C	M	M	M	M	M	C	C	M	C	C	C	M	C	C	M	C	C	C	M	M	C	C	C	C	C	C	C	M	C	C	C
S5_2649690	A/G	5	2649690	+	NA	NA	NA	NA	NA	NA	A	A	A	A	R	A	R	A	R	R	R	R	R	A	A	R	A	R	A	R	R	A	R	A	A	A	R	R	A	A	A	A	A	A	A	R	A	A	A
S5_2649859	A/G	5	2649859	+	NA	NA	NA	NA	NA	NA	A	A	A	A	N	A	A	A	A	A	A	A	A	A	N	A	A	R	A	A	G	A	A	A	A	A	A	A	A	A	A	A	A	A	A	A	A	A	A
S5_2663159	T/A	5	2663159	+	NA	NA	NA	NA	NA	NA	T	T	T	T	T	T	W	T	W	W	W	W	W	T	T	W	T	W	T	W	W	T	W	T	T	T	W	W	T	T	T	T	T	T	T	W	T	T	T
S5_2667741	G/A	5	2667741	+	NA	NA	NA	NA	NA	NA	G	G	G	G	G	G	R	G	R	R	R	A	R	G	G	R	G	R	G	R	R	G	R	G	G	G	R	R	G	G	G	G	G	G	G	R	G	G	G
S5_2667879	A/G	5	2667879	+	NA	NA	NA	NA	NA	NA	A	A	A	A	N	A	R	A	R	R	R	R	R	A	N	R	A	A	A	R	G	A	R	A	A	A	R	R	A	A	A	A	A	A	A	R	A	A	A
S5_2668000	T/G	5	2668000	+	NA	NA	NA	NA	NA	NA	T	T	T	T	T	T	K	T	K	K	K	K	K	T	T	K	T	T	T	K	T	T	K	T	T	T	K	K	T	T	T	T	T	T	T	K	T	T	T
S5_2699074	G/A	5	2699074	+	NA	NA	NA	NA	NA	NA	G	G	G	G	R	G	R	G	G	R	R	R	R	G	G	R	G	R	G	R	R	G	R	G	G	G	R	R	G	G	G	G	G	G	G	R	G	G	G
S5_2704675	A/T	5	2704675	+	NA	NA	NA	NA	NA	NA	N	A	A	A	N	A	A	A	A	A	A	A	A	A	A	A	A	W	A	A	W	A	A	A	A	A	A	A	A	A	A	A	A	A	A	A	A	A	A
S7_78394	T/A	7	78394	+	NA	NA	NA	NA	NA	NA	T	T	T	T	N	T	W	T	W	W	T	T	T	T	T	T	W	N	T	T	A	T	W	T	T	T	W	W	T	T	T	T	W	T	T	W	W	T	T
S7_105871	C/T	7	105871	+	NA	NA	NA	NA	NA	NA	N	C	C	C	C	C	Y	C	Y	C	Y	Y	C	C	Y	C	Y	C	Y	C	C	C	C	C	C	Y	Y	Y	C	C	C	Y	N	C	C	N	C	Y	C
S7_124014	G/A	7	124014	+	NA	NA	NA	NA	NA	NA	G	G	G	G	N	G	R	G	R	R	G	G	G	G	R	G	R	G	R	G	R	G	R	G	G	G	R	R	G	G	G	G	R	R	G	R	R	G	G
S7_124129	C/A	7	124129	+	NA	NA	NA	NA	NA	NA	C	C	C	C	N	C	M	C	N	M	M	C	C	C	N	C	M	C	M	C	A	C	M	C	C	N	N	A	C	C	C	M	C	C	M	M	M	M	C
S7_124258	T/C	7	124258	+	NA	NA	NA	NA	NA	NA	T	T	T	T	C	N	Y	T	T	Y	Y	T	T	T	T	T	Y	T	Y	T	T	T	Y	Y	T	Y	T	Y	T	T	T	Y	Y	Y	Y	C	Y	Y	T
S7_237047	T/C	7	237047	+	NA	NA	NA	NA	NA	NA	T	T	T	T	C	T	Y	T	Y	Y	Y	T	T	T	N	T	Y	T	Y	T	Y	T	Y	Y	T	Y	Y	Y	T	T	T	Y	Y	Y	Y	Y	Y	Y	T
S7_354244	G/T	7	354244	+	NA	NA	NA	NA	NA	NA	G	G	G	G	K	G	G	G	G	G	K	G	G	G	G	G	G	G	G	G	G	G	G	K	G	K	G	G	G	G	G	K	G	G	K	G	G	K	G
S7_358250	A/G	7	358250	+	NA	NA	NA	NA	NA	NA	A	A	A	A	G	A	R	A	R	R	R	A	A	A	R	A	R	A	R	A	R	A	R	R	A	R	R	R	A	A	A	G	R	R	R	R	R	A	A
S7_370657	G/A	7	370657	+	NA	NA	NA	NA	NA	NA	G	G	G	G	G	G	R	G	R	G	R	G	G	G	N	G	R	G	R	G	G	G	R	R	G	R	R	R	G	G	G	R	R	R	R	R	R	G	G
S7_445976	A/G	7	445976	+	NA	NA	NA	NA	NA	NA	A	A	A	A	N	A	A	A	A	R	R	A	A	A	N	A	R	N	R	A	A	A	R	R	A	R	G	R	A	A	A	G	R	R	R	R	G	R	A
S7_446093	C/G	7	446093	+	NA	NA	NA	NA	NA	NA	C	C	C	C	S	C	S	C	S	S	S	C	C	C	S	C	S	C	S	C	S	C	S	S	C	S	S	S	C	C	C	S	S	S	S	S	S	S	C
S7_446293	G/T	7	446293	+	NA	NA	NA	NA	NA	NA	N	G	G	G	N	G	K	G	G	K	G	G	G	G	N	N	K	G	K	G	K	G	K	G	G	G	G	K	N	G	G	G	T	G	G	K	K	G	G
S7_446449	T/C	7	446449	+	NA	NA	NA	NA	NA	NA	T	T	T	T	T	T	Y	T	Y	Y	Y	T	T	T	T	T	Y	T	Y	T	T	T	Y	Y	T	Y	Y	Y	T	T	T	Y	Y	Y	C	Y	Y	Y	T
S8_79981	A/C	8	79981	+	NA	NA	NA	NA	NA	NA	M	A	A	M	M	C	M	A	M	A	M	A	M	A	M	M	A	M	M	M	A	M	A	A	M	M	A	A	M	A	M	A	A	M	A	A	M	A	M
S8_85511	A/T	8	85511	+	NA	NA	NA	NA	NA	NA	W	A	A	W	W	W	W	A	W	A	W	A	W	A	W	W	A	W	W	W	W	W	A	A	W	W	A	A	W	A	W	A	A	W	A	A	W	A	W
S8_112887	C/A	8	112887	+	NA	NA	NA	NA	NA	NA	A	C	C	M	M	M	M	C	M	C	M	C	M	C	M	M	C	M	M	M	M	M	C	C	M	M	C	C	M	C	M	C	C	M	C	C	A	C	M
S8_156815	T/A	8	156815	+	NA	NA	NA	NA	NA	NA	W	T	T	T	W	T	T	T	T	T	W	T	T	T	W	T	T	W	T	T	T	T	T	T	T	W	T	T	T	T	W	T	T	T	T	T	T	T	W
S8_175741	T/C	8	175741	+	NA	NA	NA	NA	NA	NA	Y	T	T	Y	C	C	Y	T	T	T	Y	T	Y	T	T	T	T	Y	C	Y	T	Y	T	T	C	Y	T	T	Y	T	Y	T	T	Y	T	T	Y	T	Y
S8_176793	A/G	8	176793	+	NA	NA	NA	NA	NA	NA	R	A	A	R	R	R	R	A	R	A	R	A	R	A	G	R	A	R	R	R	A	R	A	A	R	R	A	A	R	A	R	A	A	R	A	A	R	A	R
S8_182083	T/C	8	182083	+	NA	NA	NA	NA	NA	NA	T	T	T	Y	N	T	N	T	C	T	Y	T	Y	T	N	Y	T	Y	Y	Y	T	C	T	T	Y	C	T	T	C	T	Y	T	T	N	T	T	Y	T	Y
S8_193728	C/A	8	193728	+	NA	NA	NA	NA	NA	NA	C	C	C	M	C	M	M	C	M	C	C	C	M	C	C	M	C	C	M	M	M	M	C	C	M	C	C	C	M	C	C	C	C	A	C	C	M	C	C
S8_220227	C/T	8	220227	+	NA	NA	NA	NA	NA	NA	Y	C	C	Y	Y	C	Y	C	Y	C	Y	C	Y	C	N	Y	C	Y	Y	Y	C	Y	C	C	Y	Y	C	C	Y	C	Y	C	C	Y	C	C	C	C	Y
S8_220359	A/G	8	220359	+	NA	NA	NA	NA	NA	NA	R	A	A	R	G	N	R	A	R	A	R	A	R	A	N	R	A	R	R	R	A	R	A	A	R	R	A	A	R	A	R	A	A	G	A	A	R	A	A
S8_242570	G	8	242570	+	NA	NA	NA	NA	NA	NA	G	G	G	G	G	G	G	G	G	G	G	G	G	G	G	G	G	G	G	G	G	G	G	G	G	G	G	G	G	G	G	G	G	G	G	G	G	G	G
S8_242683	C/T	8	242683	+	NA	NA	NA	NA	NA	NA	N	Y	C	C	N	Y	C	C	C	Y	C	C	Y	C	N	C	C	C	Y	C	Y	C	C	C	C	C	C	C	C	Y	C	C	C	C	C	C	C	C	C
S8_242787	C/A	8	242787	+	NA	NA	NA	NA	NA	NA	C	M	C	C	C	C	M	M	C	M	M	M	M	M	M	C	C	M	M	M	M	C	C	M	M	M	C	C	M	M	M	M	C	M	M	C	M	C	C
S8_249596	A/T	8	249596	+	NA	NA	NA	NA	NA	NA	W	A	A	A	W	A	A	A	A	A	W	A	A	A	W	A	A	W	A	A	A	A	A	A	A	W	A	A	A	A	W	A	A	A	A	A	A	A	W
S8_257079	G/A	8	257079	+	NA	NA	NA	NA	NA	NA	R	G	G	R	R	R	R	G	R	G	R	G	R	G	A	R	G	R	R	R	R	R	G	G	R	R	G	G	R	G	R	G	G	R	G	G	R	G	R
S8_264269	G/C	8	264269	+	NA	NA	NA	NA	NA	NA	G	G	G	G	G	G	G	G	G	G	G	G	G	G	G	G	G	G	G	G	G	G	G	G	G	G	G	G	G	G	G	G	G	G	G	G	G	G	G
S8_272030	T/C	8	272030	+	NA	NA	NA	NA	NA	NA	Y	Y	T	Y	Y	Y	Y	T	Y	Y	Y	Y	Y	Y	Y	Y	T	Y	Y	Y	Y	Y	Y	Y	Y	Y	T	Y	Y	Y	Y	T	T	Y	T	Y	Y	Y	Y
S8_277949	A	8	277949	+	NA	NA	NA	NA	NA	NA	A	A	A	A	A	A	A	A	A	A	A	A	A	A	A	A	A	A	A	A	A	A	A	A	A	A	A	A	A	A	A	A	A	A	A	A	A	A	A
S8_302121	C/G	8	302121	+	NA	NA	NA	NA	NA	NA	S	C	C	S	S	S	S	C	S	C	S	C	S	C	S	S	C	S	S	S	C	S	C	C	S	S	C	C	S	C	S	C	C	S	C	C	S	C	S
S8_304001	A/C	8	304001	+	NA	NA	NA	NA	NA	NA	C	A	A	A	A	A	M	A	M	N	M	N	A	A	A	M	A	M	M	M	A	M	A	A	M	M	A	A	C	A	M	A	A	C	A	A	M	A	M
S8_316525	C/T	8	316525	+	NA	NA	NA	NA	NA	NA	C	C	C	Y	C	Y	Y	C	Y	C	Y	N	Y	C	T	Y	C	Y	C	Y	C	Y	C	C	Y	Y	C	C	Y	C	Y	C	C	Y	C	C	Y	C	Y
S8_316673	T/C	8	316673	+	NA	NA	NA	NA	NA	NA	C	T	T	Y	T	C	Y	T	Y	T	Y	T	Y	T	C	Y	T	Y	Y	Y	Y	Y	T	T	Y	Y	T	T	Y	T	Y	T	T	Y	T	T	Y	T	Y
S8_389134	C/T	8	389134	+	NA	NA	NA	NA	NA	NA	Y	C	C	Y	Y	Y	Y	C	Y	C	T	C	Y	C	Y	Y	C	Y	Y	Y	Y	T	C	C	Y	Y	C	C	Y	C	Y	C	C	T	C	C	Y	C	Y
S8_409121	T/C	8	409121	+	NA	NA	NA	NA	NA	NA	Y	T	T	Y	Y	C	Y	T	Y	T	Y	T	Y	T	T	Y	T	Y	Y	Y	T	Y	T	T	Y	Y	T	T	Y	T	Y	T	T	Y	T	T	Y	T	Y
S8_409293	T/A	8	409293	+	NA	NA	NA	NA	NA	NA	T	T	T	W	T	W	W	T	W	T	T	T	W	T	T	W	T	T	W	W	T	W	T	T	W	T	T	T	W	T	T	T	T	W	T	T	W	T	T
S8_411579	G/A	8	411579	+	NA	NA	NA	NA	NA	NA	R	G	G	R	R	R	R	G	R	G	R	G	R	G	R	G	G	R	R	R	G	R	G	G	R	R	G	G	G	G	R	G	G	R	G	G	R	G	R
S8_436290	G/A	8	436290	+	NA	NA	NA	NA	NA	NA	R	G	G	R	R	A	R	G	R	G	R	G	R	G	A	R	G	R	R	R	G	R	G	G	R	R	G	G	R	G	R	G	G	G	G	G	R	G	R
S8_466495	A/G	8	466495	+	NA	NA	NA	NA	NA	NA	R	A	A	R	R	R	R	A	G	A	R	A	R	A	G	R	A	G	R	R	R	R	A	A	R	R	A	A	R	A	R	A	A	R	A	A	R	A	R
S8_467449	T/G	8	467449	+	NA	NA	NA	NA	NA	NA	K	T	T	T	T	N	T	T	T	T	K	T	T	T	T	T	T	T	T	T	T	T	T	T	T	K	T	T	T	T	K	T	T	T	T	T	T	T	K
S8_489751	A/G	8	489751	+	NA	NA	NA	NA	NA	NA	A	A	A	R	A	R	A	A	R	A	A	A	R	A	A	R	N	A	R	R	A	R	A	A	R	A	A	A	N	A	R	A	A	R	A	A	R	A	A
S8_489939	T/C	8	489939	+	NA	NA	NA	NA	NA	NA	C	T	T	Y	T	T	Y	T	Y	T	Y	T	C	T	T	Y	T	Y	Y	Y	Y	Y	T	T	Y	Y	T	T	Y	T	Y	T	T	Y	T	T	Y	T	Y
S8_497868	A/G	8	497868	+	NA	NA	NA	NA	NA	NA	R	A	A	R	R	R	R	A	R	A	R	A	A	A	N	R	A	R	R	R	A	G	A	A	R	R	A	A	R	A	R	A	A	R	A	A	R	A	R
S8_559984	C/G	8	559984	+	NA	NA	NA	NA	NA	NA	G	C	C	S	C	C	S	C	S	C	S	C	G	C	N	G	C	S	G	S	C	S	C	C	G	C	C	C	S	C	S	C	C	S	C	C	G	C	S
S8_560094	G/A	8	560094	+	NA	NA	NA	NA	NA	NA	A	G	G	R	G	A	R	G	R	G	R	G	R	G	A	R	G	R	R	R	G	R	G	G	R	R	G	G	G	G	R	G	G	R	G	G	R	G	R
S8_585638	T/A	8	585638	+	NA	NA	NA	NA	NA	NA	W	T	T	W	A	T	T	T	W	T	W	T	W	T	T	W	T	A	W	W	T	W	T	T	W	W	T	T	W	T	W	T	T	W	T	T	W	T	W
S8_585830	C/T	8	585830	+	NA	NA	NA	NA	NA	NA	T	C	N	Y	N	C	N	C	Y	C	Y	C	C	C	C	C	C	Y	C	C	C	C	C	C	C	C	C	C	N	C	Y	C	C	Y	C	C	C	C	Y
S8_590734	A/G	8	590734	+	NA	NA	NA	NA	NA	NA	G	A	A	R	G	N	R	A	G	A	R	N	A	A	N	N	A	R	R	A	R	R	A	A	R	R	A	A	G	A	R	A	A	A	A	A	R	A	R
S8_689283	G/T	8	689283	+	NA	NA	NA	NA	NA	NA	G	G	G	K	K	T	K	G	K	G	K	G	K	G	K	K	G	K	K	K	G	K	G	G	K	T	G	G	K	G	K	G	G	T	G	G	K	G	K
S8_696930	G/T	8	696930	+	NA	NA	NA	NA	NA	NA	G	G	G	G	N	N	G	G	G	G	G	G	G	G	G	G	G	G	G	G	G	G	G	G	G	G	G	G	G	G	G	G	G	G	G	G	G	G	G
S8_697177	G/C	8	697177	+	NA	NA	NA	NA	NA	NA	G	G	G	S	G	G	S	G	G	G	G	G	G	G	G	G	G	G	G	G	S	G	G	G	G	G	G	S	G	G	G	G	G	S	G	G	G	G	G
S8_764575	C/G	8	764575	+	NA	NA	NA	NA	NA	NA	G	C	C	S	G	C	S	C	C	C	S	C	S	C	G	C	C	S	S	S	C	S	C	C	S	S	C	C	S	C	S	C	C	S	C	C	S	C	S
S8_936038	T/C	8	936038	+	NA	NA	NA	NA	NA	NA	T	T	T	Y	T	Y	C	T	Y	T	C	T	C	T	T	Y	T	T	Y	C	Y	C	T	T	Y	C	T	T	Y	T	T	T	Y	Y	T	T	C	T	T
S8_957356	A/C	8	957356	+	NA	NA	NA	NA	NA	NA	A	A	A	A	A	A	A	A	A	A	A	N	A	A	A	A	A	A	A	A	A	A	A	A	A	A	A	A	A	A	A	A	A	A	A	A	A	A	A
S8_962107	G/A	8	962107	+	NA	NA	NA	NA	NA	NA	G	G	G	R	G	R	R	G	R	G	R	G	R	G	G	R	G	G	R	R	R	R	G	G	R	R	G	G	R	G	G	G	R	R	G	G	R	G	G
S8_964306	G/C	8	964306	+	NA	NA	NA	NA	NA	NA	G	G	G	S	G	S	S	G	S	G	S	G	S	G	G	S	G	G	S	S	G	S	G	G	S	S	G	G	S	G	G	G	S	S	G	G	S	G	G
S8_965088	C/T	8	965088	+	NA	NA	NA	NA	NA	NA	Y	C	C	C	C	C	C	C	C	C	C	C	C	C	N	C	C	Y	C	C	C	C	C	C	C	C	N	C	C	C	Y	N	C	C	C	C	C	C	Y
S8_971185	T/C	8	971185	+	NA	NA	NA	NA	NA	NA	Y	T	T	T	Y	T	T	T	T	T	T	T	T	T	T	T	T	Y	T	T	T	T	T	T	T	T	T	T	T	T	Y	T	T	T	T	T	T	T	Y
S8_971308	T/C	8	971308	+	NA	NA	NA	NA	NA	NA	C	T	T	Y	N	T	N	T	Y	T	Y	T	Y	T	T	Y	T	Y	Y	Y	T	Y	T	T	Y	C	T	T	N	T	Y	T	C	T	T	T	Y	T	Y
S8_971522	A/T	8	971522	+	NA	NA	NA	NA	NA	NA	A	A	A	W	A	W	W	A	W	A	A	A	W	A	A	T	A	A	N	W	A	W	A	A	W	W	A	A	A	A	A	A	W	A	A	A	W	A	A
S8_973832	C/T	8	973832	+	NA	NA	NA	NA	NA	NA	C	C	C	Y	C	Y	Y	C	Y	C	Y	C	Y	C	C	T	C	C	T	Y	C	Y	C	C	Y	Y	C	C	Y	N	C	C	Y	T	C	C	Y	N	C
S8_973943	T/C	8	973943	+	NA	NA	NA	NA	NA	NA	N	T	T	Y	N	N	Y	T	Y	T	Y	T	T	T	T	Y	T	T	Y	C	Y	Y	T	T	Y	Y	T	T	Y	N	T	T	Y	C	T	T	Y	N	T
S8_974065	C/A	8	974065	+	NA	NA	NA	NA	NA	NA	M	C	C	C	C	C	C	C	C	C	C	C	C	C	N	C	C	C	C	C	C	C	C	C	C	C	C	C	C	C	C	C	C	C	C	C	C	C	C
S8_974276	A/G	8	974276	+	NA	NA	NA	NA	NA	NA	A	A	A	A	G	A	A	A	A	A	A	A	A	A	N	A	A	R	A	A	A	A	A	A	A	A	A	A	A	A	R	A	A	A	A	A	A	A	R
S8_974795	T/A	8	974795	+	NA	NA	NA	NA	NA	NA	W	T	T	T	W	T	T	T	T	T	T	T	T	T	W	T	T	W	T	T	T	T	T	T	T	T	T	T	T	T	W	T	T	T	T	T	T	T	W
S8_974914	G/A	8	974914	+	NA	NA	NA	NA	NA	NA	R	G	G	R	N	R	R	G	N	G	R	G	A	G	N	G	G	G	R	R	R	R	G	G	R	R	G	G	R	R	R	G	R	G	G	G	R	G	R
S8_992667	A/C	8	992667	+	NA	NA	NA	NA	NA	NA	M	A	A	A	M	A	A	A	A	A	A	N	A	A	C	A	A	A	N	A	A	A	A	A	A	A	N	A	N	A	A	A	A	A	A	A	A	A	M
S8_1025792	A/G	8	1025792	+	NA	NA	NA	NA	NA	NA	R	A	A	A	R	A	A	A	A	A	A	A	A	A	R	A	A	R	A	A	A	A	A	A	A	A	A	A	A	A	R	A	A	A	A	A	A	A	R
S8_1045731	C/A	8	1045731	+	NA	NA	NA	NA	NA	NA	C	C	C	M	C	A	M	C	M	C	M	C	M	C	C	M	C	C	M	M	C	M	C	C	M	M	C	C	M	C	C	C	M	M	C	C	M	C	C
S8_1050163	T/C	8	1050163	+	NA	NA	NA	NA	NA	NA	C	T	T	Y	C	C	Y	T	Y	T	Y	T	Y	T	Y	Y	T	Y	Y	Y	T	Y	T	T	Y	Y	T	T	T	T	Y	T	Y	Y	T	T	Y	T	Y
S8_1050596	C/T	8	1050596	+	NA	NA	NA	NA	NA	NA	C	C	C	C	T	N	C	C	C	C	C	C	C	C	N	C	C	T	N	C	C	C	C	C	C	C	C	C	N	C	Y	C	C	C	C	C	C	C	N
S8_1066557	C/T	8	1066557	+	NA	NA	NA	NA	NA	NA	C	C	C	C	N	N	C	C	C	C	C	C	C	C	N	C	C	C	C	C	C	C	C	C	C	C	C	C	N	C	N	C	N	C	C	C	C	C	C
S8_1066679	G/A	8	1066679	+	NA	NA	NA	NA	NA	NA	G	R	G	G	R	G	R	R	G	G	G	G	R	R	G	G	G	N	R	G	R	G	G	G	G	G	R	G	A	R	R	G	R	G	G	G	R	R	G
S8_1067378	T/C	8	1067378	+	NA	NA	NA	NA	NA	NA	T	T	T	T	N	T	Y	T	T	T	T	Y	Y	T	N	T	T	T	T	T	T	T	T	T	Y	T	T	T	T	T	T	T	T	T	T	T	T	N	T
S11_3069	G/A	11	3069	+	NA	NA	NA	NA	NA	NA	G	G	G	R	R	G	R	G	R	R	G	G	R	R	R	G	R	G	G	R	G	G	R	R	G	R	R	R	G	G	G	R	G	G	R	G	R	R	G
S11_4657	T/A	11	4657	+	NA	NA	NA	NA	NA	NA	T	T	T	W	W	T	W	T	W	W	T	T	W	W	T	T	W	T	T	W	T	T	W	W	T	W	W	W	T	T	T	W	T	T	W	T	W	W	T
S11_8680	A/G	11	8680	+	NA	NA	NA	NA	NA	NA	A	A	A	R	R	A	R	A	R	R	A	A	R	R	R	A	R	A	A	R	A	A	R	R	A	R	R	R	A	A	A	R	A	A	R	A	R	R	A
S11_12673	G/A	11	12673	+	NA	NA	NA	NA	NA	NA	G	G	G	R	R	G	R	G	R	R	G	G	R	R	R	G	R	G	G	R	G	G	R	R	G	R	R	R	G	G	G	R	G	G	R	G	R	R	G
S11_16940	G/C	11	16940	+	NA	NA	NA	NA	NA	NA	G	G	G	S	S	N	S	G	S	S	G	G	G	S	S	G	S	G	G	S	G	G	S	S	G	S	S	S	G	G	G	S	G	G	S	G	S	S	G
S11_19830	C/A	11	19830	+	NA	NA	NA	NA	NA	NA	C	C	C	C	C	C	C	C	C	C	C	C	C	C	C	C	C	C	C	C	C	C	C	C	C	C	C	C	C	C	C	C	C	C	C	C	C	C	C
S11_28255	G/A	11	28255	+	NA	NA	NA	NA	NA	NA	G	G	G	R	G	N	R	G	R	R	G	G	R	R	G	G	R	G	G	R	G	G	R	G	G	R	R	R	G	G	G	G	G	G	R	G	R	R	G
S11_43043	A/C	11	43043	+	NA	NA	NA	NA	NA	NA	A	A	A	M	A	A	M	A	M	M	A	A	M	M	N	A	M	A	A	M	A	A	M	M	A	M	M	M	A	A	A	M	A	A	M	A	M	M	A
S11_43677	T/A	11	43677	+	NA	NA	NA	NA	NA	NA	T	T	T	W	W	T	W	T	W	W	T	T	W	W	A	T	W	T	T	W	T	T	W	W	T	W	W	W	T	T	T	T	T	T	W	T	W	T	T
S11_43879	A/G	11	43879	+	NA	NA	NA	NA	NA	NA	A	A	A	R	G	N	R	A	R	R	A	A	R	R	N	A	R	A	A	R	A	A	R	R	A	R	R	R	A	A	A	G	A	N	R	A	R	R	A
S11_50479	A/G	11	50479	+	NA	NA	NA	NA	NA	NA	A	A	A	R	R	A	R	A	R	R	A	A	R	R	R	A	R	A	A	R	A	A	R	R	A	R	R	R	A	A	A	R	A	A	R	A	R	R	A
S11_97573	G/T	11	97573	+	NA	NA	NA	NA	NA	NA	N	G	G	K	G	G	K	G	K	K	G	G	K	G	G	G	K	G	G	K	G	G	K	G	G	K	K	K	G	G	G	G	G	G	K	G	K	T	G
S11_97684	T/A	11	97684	+	NA	NA	NA	NA	NA	NA	T	T	T	A	A	T	W	T	W	W	T	T	W	W	T	T	W	T	T	W	T	T	W	W	T	W	W	W	T	T	T	W	T	T	W	T	W	W	T
S11_110650	G/T	11	110650	+	NA	NA	NA	NA	NA	NA	G	G	K	G	G	G	G	G	G	G	G	G	G	N	N	G	G	G	G	G	G	G	G	G	G	G	G	N	G	G	G	G	G	G	G	G	G	G	G
S11_119933	A/T	11	119933	+	NA	NA	NA	NA	NA	NA	A	A	A	W	A	A	W	A	W	W	A	A	W	W	N	A	W	A	A	W	A	A	W	A	A	W	W	W	A	A	A	A	A	A	W	A	W	W	A
S11_120679	A/G	11	120679	+	NA	NA	NA	NA	NA	NA	A	A	A	G	A	A	R	A	R	R	A	A	R	R	A	A	R	A	A	R	A	A	R	R	A	R	R	R	A	A	A	R	A	A	R	A	R	R	A
S11_123774	T/A	11	123774	+	NA	NA	NA	NA	NA	NA	T	T	T	W	N	N	W	T	T	W	T	T	A	W	N	T	W	T	T	W	T	T	W	W	T	W	W	W	N	T	T	T	T	T	W	T	W	W	T
S11_123902	A/T	11	123902	+	NA	NA	NA	NA	NA	NA	A	A	A	W	W	A	W	A	W	W	A	A	W	W	W	A	W	A	A	W	A	A	W	W	A	W	W	W	A	A	A	W	A	A	W	A	W	W	A
S11_169071	A/C	11	169071	+	NA	NA	NA	NA	NA	NA	A	A	A	A	C	A	A	A	A	A	A	A	A	A	C	A	A	A	A	A	A	A	A	M	A	A	A	A	A	A	A	M	A	A	A	A	A	A	A
S11_184171	G/A	11	184171	+	NA	NA	NA	NA	NA	NA	G	G	G	R	R	G	R	G	R	R	G	G	R	R	R	G	R	G	G	R	G	G	R	R	G	R	R	R	G	G	G	R	G	G	R	G	R	R	G
S11_184275	C/T	11	184275	+	NA	NA	NA	NA	NA	NA	N	C	C	Y	T	N	Y	C	Y	Y	C	C	Y	Y	T	C	T	N	C	Y	C	C	Y	Y	C	Y	Y	Y	C	C	C	Y	C	C	Y	C	Y	Y	C
S11_184382	T/G	11	184382	+	NA	NA	NA	NA	NA	NA	T	T	T	K	T	N	K	T	G	K	T	T	K	K	N	T	K	T	T	G	T	T	K	K	T	K	K	G	T	T	T	K	T	T	K	T	K	T	T
S11_205395	A/C	11	205395	+	NA	NA	NA	NA	NA	NA	A	A	A	A	M	A	A	A	A	A	A	A	A	A	M	A	A	A	A	A	A	A	A	M	A	A	A	A	A	A	A	M	A	A	A	A	A	A	A
S11_260123	T/G	11	260123	+	NA	NA	NA	NA	NA	NA	T	T	T	K	T	T	N	T	G	G	T	T	T	K	N	T	T	T	T	K	T	T	K	K	N	K	K	G	T	T	T	T	T	T	K	T	K	K	T
S11_260241	G/C	11	260241	+	NA	NA	NA	NA	NA	NA	G	G	G	S	N	N	C	G	G	S	G	G	C	S	N	G	N	G	G	S	G	G	S	G	G	S	G	C	G	G	G	G	N	G	G	G	S	S	G
S11_281818	A/G	11	281818	+	NA	NA	NA	NA	NA	NA	A	A	A	R	G	A	R	A	R	R	A	A	R	A	N	A	R	A	A	R	A	A	R	R	A	R	A	R	A	A	A	R	A	R	R	A	A	A	A
S11_291259	A/G	11	291259	+	NA	NA	NA	NA	NA	NA	A	A	A	A	G	A	A	A	A	A	A	A	A	A	A	A	A	A	A	A	A	A	A	R	A	A	A	A	A	A	A	R	A	A	A	A	A	A	A
S11_291397	A/T	11	291397	+	NA	NA	NA	NA	NA	NA	A	A	A	W	T	A	W	A	W	W	A	A	W	W	W	A	W	A	A	W	A	A	W	W	A	W	W	W	A	A	A	W	A	W	W	A	W	W	A
S11_291962	T/C	11	291962	+	NA	NA	NA	NA	NA	NA	T	T	T	Y	Y	T	Y	T	Y	Y	T	T	Y	Y	Y	T	Y	T	T	Y	T	T	Y	Y	T	Y	Y	Y	T	T	T	Y	T	Y	Y	T	Y	Y	T
S11_312873	T/A	11	312873	+	NA	NA	NA	NA	NA	NA	T	T	T	W	A	T	W	T	W	W	T	T	W	W	W	T	W	T	T	W	T	T	W	W	T	W	W	W	T	T	T	W	T	W	W	T	W	W	T
S11_313053	A/G	11	313053	+	NA	NA	NA	NA	NA	NA	A	A	A	R	R	N	R	A	R	G	A	A	G	R	N	A	R	A	A	R	A	A	R	R	A	R	R	R	A	A	A	A	N	A	R	A	A	G	A
S11_358438	T/G	11	358438	+	NA	NA	NA	NA	NA	NA	T	T	T	T	T	T	K	T	K	K	K	K	K	N	N	T	T	K	T	K	T	T	K	T	T	T	K	K	T	T	T	T	T	T	K	K	K	T	T
S11_358680	C/T	11	358680	+	NA	NA	NA	NA	NA	NA	C	C	C	C	Y	C	C	C	C	C	C	C	C	C	C	C	C	C	C	C	C	C	C	C	C	C	C	C	C	C	C	C	C	C	C	C	C	C	C
S11_376554	T/C	11	376554	+	NA	NA	NA	NA	NA	NA	T	T	T	Y	C	T	Y	T	Y	Y	T	T	Y	Y	Y	T	Y	T	T	Y	T	T	Y	Y	T	Y	C	Y	T	T	T	T	T	Y	Y	T	Y	Y	T
S11_380679	T/A	11	380679	+	NA	NA	NA	NA	NA	NA	T	T	T	W	T	T	W	T	W	W	T	T	W	W	T	T	W	T	T	W	T	T	W	T	T	W	W	W	T	T	T	T	T	W	W	T	W	W	T
S11_382975	A/T	11	382975	+	NA	NA	NA	NA	NA	NA	N	A	A	W	W	A	W	A	W	N	A	A	W	W	A	A	W	A	A	T	A	A	N	W	A	A	W	W	N	A	A	W	A	W	W	A	T	W	A
S11_389679	C/T	11	389679	+	NA	NA	NA	NA	NA	NA	C	C	C	Y	Y	C	Y	C	Y	Y	C	C	Y	Y	Y	C	C	C	C	Y	C	C	Y	Y	C	Y	Y	Y	C	C	C	Y	C	Y	Y	C	Y	Y	C
S11_402696	T/C	11	402696	+	NA	NA	NA	NA	NA	NA	T	T	T	Y	Y	T	Y	T	Y	T	T	T	Y	T	T	T	Y	T	T	T	T	T	T	T	T	T	Y	Y	T	T	T	Y	T	Y	Y	T	T	T	T
S11_403243	C/A	11	403243	+	NA	NA	NA	NA	NA	NA	C	C	C	M	N	C	M	C	M	M	C	C	M	M	A	C	M	C	C	M	C	C	M	M	C	M	C	M	C	C	C	M	C	M	M	C	M	C	C
S11_403365	A/G	11	403365	+	NA	NA	NA	NA	NA	NA	A	A	A	R	N	A	R	A	R	R	A	A	G	R	N	A	A	A	A	R	A	A	R	R	A	R	R	R	A	A	A	R	A	R	R	A	R	A	A
S11_409841	G/T	11	409841	+	NA	NA	NA	NA	NA	NA	G	G	G	G	K	G	G	G	G	G	G	G	G	G	K	G	G	G	G	G	G	G	G	K	G	G	G	G	G	G	G	K	G	G	G	G	G	G	G
S11_412939	C/A	11	412939	+	NA	NA	NA	NA	NA	NA	C	C	C	M	M	C	M	C	M	M	C	C	M	M	M	C	M	C	C	M	C	C	M	M	C	M	C	M	C	C	C	M	C	C	M	C	M	M	C
S11_430594	T/C	11	430594	+	NA	NA	NA	NA	NA	NA	T	T	T	T	Y	T	T	T	T	T	T	T	T	T	T	T	T	T	T	T	T	T	T	Y	T	T	T	T	T	T	T	Y	T	T	T	T	T	T	T
S11_449357	C/G	11	449357	+	NA	NA	NA	NA	NA	NA	C	C	C	C	C	N	S	C	C	S	C	C	S	S	C	C	G	C	C	S	C	C	S	C	C	S	S	C	C	C	C	C	C	S	S	C	C	C	C
S11_449484	C/A	11	449484	+	NA	NA	NA	NA	NA	NA	C	C	C	M	A	N	C	C	C	A	C	C	C	M	N	N	M	C	C	M	C	C	M	A	C	M	A	M	C	C	C	C	C	M	C	C	N	N	C
S11_455016	G/A	11	455016	+	NA	NA	NA	NA	NA	NA	G	G	G	G	N	G	G	G	G	G	G	G	G	G	N	G	G	G	G	G	G	G	G	R	G	G	G	G	G	G	G	R	G	G	G	G	G	G	G
S11_455189	T/A	11	455189	+	NA	NA	NA	NA	NA	NA	T	T	T	W	N	T	W	T	W	N	T	T	T	A	N	T	W	T	T	W	T	T	W	T	T	W	W	A	T	T	T	W	T	W	W	T	W	W	T
S11_488085	G/T	11	488085	+	NA	NA	NA	NA	NA	NA	G	G	G	K	N	N	G	G	G	N	G	N	G	G	G	G	T	G	G	K	N	G	G	G	G	K	K	G	G	G	G	G	G	K	K	G	K	K	G
S11_500432	G/C	11	500432	+	NA	NA	NA	NA	NA	NA	G	G	G	S	G	G	S	G	N	S	G	G	C	C	N	N	S	G	G	S	G	G	S	G	G	S	S	S	G	G	G	G	G	C	S	G	C	G	G
S11_502104	G/T	11	502104	+	NA	NA	NA	NA	NA	NA	G	G	G	K	N	G	K	G	N	G	G	G	T	K	N	G	K	G	G	K	G	G	K	G	G	T	K	K	G	N	G	G	G	T	K	G	K	T	G
S11_502232	G/T	11	502232	+	NA	NA	NA	NA	NA	NA	G	G	G	K	N	G	N	G	G	K	G	N	G	K	G	G	K	N	G	K	G	G	K	G	G	K	K	K	G	G	G	G	G	K	K	G	N	K	G
S11_514839	G/A	11	514839	+	NA	NA	NA	NA	NA	NA	G	G	G	A	A	G	R	G	G	R	G	G	R	R	N	N	R	G	G	R	G	G	R	A	G	G	A	A	N	G	G	A	G	R	R	G	R	R	G
S11_514944	T/A	11	514944	+	NA	NA	NA	NA	NA	NA	T	T	T	A	A	N	W	T	A	A	T	T	A	W	N	T	A	T	T	W	T	T	W	A	T	W	A	W	T	N	T	W	T	T	W	T	W	A	T
S11_515370	T/A	11	515370	+	NA	NA	NA	NA	NA	NA	T	T	T	W	W	T	W	T	W	W	T	T	W	W	A	T	W	T	T	W	T	T	W	W	T	W	W	W	T	T	T	W	T	W	W	T	W	W	T
S11_515477	C/T	11	515477	+	NA	NA	NA	NA	NA	NA	C	C	C	Y	T	C	Y	C	Y	Y	C	C	Y	Y	Y	C	Y	C	C	Y	C	C	Y	Y	C	Y	Y	Y	C	C	C	Y	C	Y	Y	C	Y	Y	C
S11_516306	G/A	11	516306	+	NA	NA	NA	NA	NA	NA	G	G	N	R	R	G	R	G	R	G	G	G	R	R	R	G	R	G	G	R	G	G	R	R	G	R	R	R	G	G	G	R	G	R	R	G	R	R	G
S11_516462	A/G	11	516462	+	NA	NA	NA	NA	NA	NA	A	A	A	R	A	N	R	A	R	R	A	A	R	R	N	A	R	A	A	R	A	A	R	R	A	R	R	A	A	A	A	R	A	R	R	A	R	A	A
S11_597010	G/A	11	597010	+	NA	NA	NA	NA	NA	NA	G	G	G	R	N	N	R	G	G	G	G	G	R	R	N	G	R	G	G	A	G	G	R	G	G	R	G	G	N	G	G	G	G	G	R	G	R	R	G
S11_598413	C/T	11	598413	+	NA	NA	NA	NA	NA	NA	C	C	C	Y	N	C	Y	C	Y	Y	C	C	Y	Y	N	N	Y	N	C	Y	C	C	Y	Y	C	Y	T	C	C	C	C	C	C	N	Y	C	Y	Y	C
S11_610140	A/G	11	610140	+	NA	NA	NA	NA	NA	NA	A	A	A	G	R	A	A	A	R	R	A	A	R	R	N	A	N	N	A	R	A	A	G	R	A	R	R	R	N	A	A	A	A	A	R	A	R	G	A
S11_630142	T/A	11	630142	+	NA	NA	NA	NA	NA	NA	T	T	T	W	W	T	W	T	W	W	T	T	W	W	T	T	W	T	T	W	T	T	W	W	T	W	W	W	T	T	T	W	T	W	W	T	W	W	T
S11_654696	C/T	11	654696	+	NA	NA	NA	NA	NA	NA	C	C	C	Y	Y	C	C	C	C	C	C	N	C	Y	N	C	Y	N	C	Y	N	C	Y	Y	C	C	C	C	C	C	C	C	C	C	Y	C	Y	Y	C
S11_675417	C/G	11	675417	+	NA	NA	NA	NA	NA	NA	C	C	S	C	N	C	C	C	N	C	C	C	C	N	C	C	C	C	C	C	C	C	C	C	C	C	C	C	C	C	C	C	C	C	C	C	C	C	C
S11_685810	G/T	11	685810	+	NA	NA	NA	NA	NA	NA	G	G	G	K	K	G	K	G	K	K	G	G	K	K	K	G	K	G	G	K	G	G	K	K	G	K	K	K	G	G	G	T	G	K	K	G	K	K	G
S11_686393	A/T	11	686393	+	NA	NA	NA	NA	NA	NA	A	A	W	A	A	A	A	A	A	A	A	A	A	A	A	A	A	A	A	A	A	A	A	A	A	A	A	A	A	A	A	A	A	A	A	A	A	A	A
S11_692908	C/T	11	692908	+	NA	NA	NA	NA	NA	NA	C	C	C	Y	Y	C	Y	C	Y	Y	C	C	Y	Y	T	C	Y	C	C	Y	C	C	Y	Y	C	Y	Y	Y	C	C	C	Y	C	Y	Y	C	Y	Y	C
S11_693227	G/A	11	693227	+	NA	NA	NA	NA	NA	NA	G	G	G	R	N	N	G	G	R	R	G	G	G	R	A	G	R	G	G	R	G	G	R	R	G	R	R	R	G	G	G	R	G	G	R	G	R	R	G
S11_750811	T/A	11	750811	+	NA	NA	NA	NA	NA	NA	T	T	T	W	T	N	A	T	W	W	W	T	A	W	T	T	W	T	T	T	T	T	W	W	T	W	W	W	N	T	T	W	T	W	W	W	W	W	T
S11_750970	T/C	11	750970	+	NA	NA	NA	NA	NA	NA	T	T	N	Y	C	N	Y	T	Y	T	Y	T	T	Y	T	T	Y	N	T	Y	T	T	Y	Y	T	Y	C	T	N	N	T	C	T	Y	Y	Y	Y	Y	T
S11_767900	T/C	11	767900	+	NA	NA	NA	NA	NA	NA	T	T	T	T	T	T	T	T	T	T	T	T	T	T	T	T	T	T	T	T	T	T	T	T	T	T	T	T	T	T	T	T	T	T	T	T	T	T	T
S11_806195	T/G	11	806195	+	NA	NA	NA	NA	NA	NA	T	T	T	K	K	T	K	T	K	T	K	T	K	T	T	T	K	T	T	K	T	T	K	K	T	T	K	K	T	N	T	G	T	K	K	K	K	G	T
S11_815786	T/A	11	815786	+	NA	NA	NA	NA	NA	NA	W	W	W	W	W	W	W	W	T	W	W	T	W	W	W	W	T	W	W	W	W	W	W	W	W	W	W	T	T	W	W	W	T	W	W	W	T	T	W
S11_917141	T	11	917141	+	NA	NA	NA	NA	NA	NA	T	T	T	T	T	T	T	T	T	T	T	T	T	T	T	T	T	T	T	T	T	T	T	T	T	T	T	T	T	T	T	T	T	T	T	T	T	T	T
S11_921723	T/C	11	921723	+	NA	NA	NA	NA	NA	NA	T	T	T	Y	T	T	Y	T	Y	T	Y	T	Y	Y	Y	T	T	T	T	Y	T	T	Y	Y	T	Y	Y	Y	T	T	T	Y	T	Y	Y	Y	C	T	T
S11_922131	T/C	11	922131	+	NA	NA	NA	NA	NA	NA	T	T	Y	Y	C	N	Y	T	Y	Y	Y	T	Y	Y	C	T	Y	T	T	Y	T	T	Y	Y	T	T	C	Y	T	T	T	C	T	Y	Y	Y	T	Y	T
S11_935394	G/A	11	935394	+	NA	NA	NA	NA	NA	NA	G	G	G	R	G	G	R	G	R	R	R	G	R	R	G	G	R	G	G	R	G	G	R	G	G	R	R	R	G	G	G	G	G	R	R	R	R	R	G
S11_948388	C/G	11	948388	+	NA	NA	NA	NA	NA	NA	C	C	C	S	C	N	G	C	C	S	S	C	C	S	N	C	S	C	C	C	C	C	S	S	C	G	G	G	C	C	C	C	C	S	G	S	C	S	C
S11_951993	A/T	11	951993	+	NA	NA	NA	NA	NA	NA	A	A	A	W	A	A	A	A	W	A	W	A	W	W	W	A	T	A	A	W	A	A	W	W	A	W	W	W	N	A	A	W	N	A	W	W	W	A	A
S11_954374	C/T	11	954374	+	NA	NA	NA	NA	NA	NA	C	C	C	Y	T	C	Y	C	Y	Y	Y	C	Y	Y	Y	C	Y	C	C	Y	C	C	Y	Y	C	Y	Y	Y	C	C	C	Y	C	Y	Y	Y	Y	Y	C
S11_954483	C/T	11	954483	+	NA	NA	NA	NA	NA	NA	C	C	C	Y	N	N	Y	C	N	N	Y	C	C	Y	N	C	Y	C	C	Y	C	C	Y	C	C	Y	Y	T	C	C	C	N	C	Y	Y	Y	Y	C	C
S11_955135	A/T	11	955135	+	NA	NA	NA	NA	NA	NA	A	A	N	W	N	N	T	A	W	T	A	A	W	N	A	A	T	A	A	W	A	A	A	W	A	W	N	W	A	A	A	W	A	W	A	W	T	W	A
S11_996989	G/A	11	996989	+	NA	NA	NA	NA	NA	NA	G	G	R	R	A	N	A	G	R	R	R	G	A	A	R	G	R	G	G	R	G	G	R	R	G	R	R	R	G	G	G	R	G	R	R	R	A	R	G
S11_1014296	A/G	11	1014296	+	NA	NA	NA	NA	NA	NA	A	A	A	R	A	A	R	A	R	R	R	A	R	A	R	A	A	A	A	R	A	A	R	R	A	R	A	R	A	A	A	R	A	A	A	A	R	A	A
S11_1027743	T/G	11	1027743	+	NA	NA	NA	NA	NA	NA	T	T	K	T	T	N	T	T	T	T	T	T	T	T	T	T	T	T	T	T	T	T	T	T	T	T	T	T	T	T	T	T	T	T	T	T	T	T	T
S11_1043759	T/C	11	1043759	+	NA	NA	NA	NA	NA	NA	T	T	T	Y	Y	T	Y	T	C	Y	Y	T	Y	Y	C	T	C	T	T	Y	T	T	Y	Y	T	Y	Y	Y	T	T	T	T	T	Y	C	Y	C	Y	T
S11_1047240	G/A	11	1047240	+	NA	NA	NA	NA	NA	NA	G	G	G	R	R	G	G	G	R	R	R	G	R	R	R	G	R	G	G	R	G	G	R	R	G	R	R	R	G	G	G	R	G	R	R	R	R	R	G
S11_1068240	A/G	11	1068240	+	NA	NA	NA	NA	NA	NA	A	A	R	A	N	A	A	A	A	N	N	A	A	A	A	N	A	A	A	A	A	A	A	A	A	A	N	A	A	N	A	A	A	A	A	A	A	N	A
S11_1077044	A/T	11	1077044	+	NA	NA	NA	NA	NA	NA	A	A	A	A	W	A	W	A	W	A	W	A	W	W	A	A	W	A	A	W	A	A	W	W	A	W	W	A	A	A	A	W	A	W	W	A	W	A	A
S11_1113267	C/T/G	11	1113267	+	NA	NA	NA	NA	NA	NA	Y	Y	Y	Y	Y	Y	Y	S	Y	Y	Y	Y	Y	Y	C	C	Y	Y	Y	Y	Y	C	Y	Y	Y	Y	Y	Y	Y	Y	Y	Y	Y	Y	Y	Y	Y	Y	Y
S11_1114258	G	11	1114258	+	NA	NA	NA	NA	NA	NA	G	G	G	G	G	G	G	G	G	G	G	G	G	G	G	G	G	G	G	G	G	G	G	G	G	G	G	G	G	G	G	G	G	G	G	G	G	G	G
S11_1146389	T/A	11	1146389	+	NA	NA	NA	NA	NA	NA	T	T	T	W	W	T	W	T	W	W	W	T	W	W	W	T	W	T	T	W	T	T	W	W	T	W	W	W	T	T	T	W	T	W	W	W	W	W	T
S11_1158604	C/T	11	1158604	+	NA	NA	NA	NA	NA	NA	C	C	C	Y	Y	C	Y	C	Y	Y	Y	C	Y	Y	Y	C	Y	C	C	Y	C	C	Y	Y	C	Y	Y	Y	C	C	C	Y	C	Y	Y	Y	Y	Y	C
S11_1171375	A/G	11	1171375	+	NA	NA	NA	NA	NA	NA	A	A	A	R	A	A	A	A	G	G	R	A	R	R	N	A	R	A	A	A	A	A	R	A	A	R	G	R	A	A	A	A	A	R	R	R	R	R	A
S11_1181224	T/C	11	1181224	+	NA	NA	NA	NA	NA	NA	T	T	N	Y	T	N	Y	N	C	N	Y	T	C	C	T	T	Y	T	T	Y	T	T	T	Y	T	Y	Y	T	T	T	T	C	T	C	Y	Y	C	C	T
S11_1182041	A/G	11	1182041	+	NA	NA	NA	NA	NA	NA	A	A	A	R	G	A	R	A	R	R	R	A	R	R	R	A	R	A	A	R	A	A	R	R	A	R	R	R	A	A	A	R	A	R	R	R	R	R	A
S11_1190298	G/A	11	1190298	+	NA	NA	NA	NA	NA	NA	N	G	G	R	N	N	A	G	A	R	A	G	N	R	N	G	G	G	G	R	G	G	R	A	G	R	R	G	G	G	G	A	G	G	G	R	G	R	G
S11_1218967	C/T	11	1218967	+	NA	NA	NA	NA	NA	NA	C	C	C	C	Y	C	C	C	C	C	C	C	C	C	N	C	C	C	C	C	C	C	C	Y	C	C	C	C	C	N	C	N	N	C	C	C	C	C	C
S11_1234597	G/A	11	1234597	+	NA	NA	NA	NA	NA	NA	G	G	G	R	R	G	R	G	R	R	R	G	R	R	R	G	R	G	G	R	G	G	R	R	G	R	R	R	G	G	G	R	G	R	R	R	R	R	G
S11_1238161	C/T	11	1238161	+	NA	NA	NA	NA	NA	NA	C	C	C	Y	T	C	Y	C	Y	Y	Y	C	Y	Y	N	C	Y	C	C	Y	C	C	Y	Y	C	Y	Y	Y	C	C	C	Y	C	Y	Y	Y	C	Y	C
S11_1288381	T/C	11	1288381	+	NA	NA	NA	NA	NA	NA	N	T	T	Y	T	N	Y	T	T	Y	T	T	Y	N	N	T	T	T	T	Y	T	T	Y	Y	T	T	T	N	T	T	T	C	T	N	Y	Y	Y	T	T
S11_1305470	A/G	11	1305470	+	NA	NA	NA	NA	NA	NA	A	A	A	A	R	A	A	A	A	A	A	A	A	A	R	A	A	A	A	A	A	A	A	R	A	A	A	A	A	A	A	R	A	A	A	A	A	A	A
S11_1319330	T/C	11	1319330	+	NA	NA	NA	NA	NA	NA	N	T	T	Y	Y	T	Y	T	C	N	C	T	Y	Y	N	T	Y	T	T	C	T	T	Y	Y	T	Y	Y	Y	T	T	T	Y	T	Y	Y	Y	C	Y	T
S11_1333044	A/G	11	1333044	+	NA	NA	NA	NA	NA	NA	A	A	A	R	R	A	R	A	R	R	R	A	R	R	R	A	R	A	A	R	A	A	R	R	A	R	R	R	A	A	A	R	A	R	R	R	R	R	A
S11_1336718	T/C	11	1336718	+	NA	NA	NA	NA	NA	NA	T	T	T	Y	Y	T	T	T	Y	Y	Y	T	Y	Y	Y	T	Y	T	T	Y	T	T	Y	Y	T	T	Y	Y	T	T	T	Y	T	Y	Y	Y	Y	Y	T
S11_1345384	T/C	11	1345384	+	NA	NA	NA	NA	NA	NA	N	T	T	Y	Y	T	Y	T	Y	Y	Y	T	Y	Y	N	T	Y	T	T	Y	T	T	C	Y	T	Y	Y	Y	T	T	T	Y	T	Y	Y	Y	C	Y	T
S11_1345498	T/C	11	1345498	+	NA	NA	NA	NA	NA	NA	T	T	T	Y	Y	T	Y	T	Y	Y	Y	T	Y	Y	N	T	Y	T	T	Y	T	T	Y	Y	T	Y	Y	T	T	T	T	T	T	Y	T	Y	Y	Y	T
S11_1358040	T/C	11	1358040	+	NA	NA	NA	NA	NA	NA	N	T	T	Y	Y	T	Y	T	Y	Y	C	T	Y	Y	C	T	Y	T	T	C	T	T	Y	C	T	Y	Y	Y	T	T	T	Y	T	Y	C	C	C	Y	T
S11_1361780	C/A	11	1361780	+	NA	NA	NA	NA	NA	NA	C	C	C	C	N	C	C	C	C	C	C	C	C	C	N	C	C	C	C	C	N	C	C	M	N	C	N	C	C	C	C	M	C	C	C	C	N	N	C
S11_1376197	A/T	11	1376197	+	NA	NA	NA	NA	NA	NA	A	A	A	A	A	A	A	A	A	A	A	A	A	A	A	A	A	A	A	A	A	A	A	W	A	A	A	A	A	A	A	W	A	A	A	A	A	A	A
S11_1380975	C/G	11	1380975	+	NA	NA	NA	NA	NA	NA	N	C	C	S	N	C	S	C	C	S	S	C	S	S	G	C	S	C	C	S	C	C	S	C	C	S	S	S	C	C	C	S	C	G	S	S	S	N	C
S11_1381394	G/A	11	1381394	+	NA	NA	NA	NA	NA	NA	G	G	G	G	R	N	R	G	G	A	R	G	R	R	A	G	R	G	G	R	G	G	R	G	G	R	R	R	G	G	G	R	G	R	R	R	R	R	G
S11_1381514	A/T	11	1381514	+	NA	NA	NA	NA	NA	NA	A	A	A	W	W	A	W	A	W	A	W	A	W	W	A	A	W	A	A	W	A	A	W	W	A	W	W	W	A	A	A	W	A	W	W	W	W	W	A
S11_1381615	A/C	11	1381615	+	NA	NA	NA	NA	NA	NA	A	A	A	M	M	A	M	A	M	C	M	A	M	M	N	N	M	A	A	M	A	A	C	M	A	M	M	C	N	A	A	M	A	M	M	M	M	M	A
S11_1401181	A/G	11	1401181	+	NA	NA	NA	NA	NA	NA	A	A	A	R	R	A	R	A	R	R	R	A	R	R	R	A	R	A	A	R	A	A	R	R	A	R	R	R	N	A	A	R	A	R	R	R	R	R	A
S11_1401449	A/G	11	1401449	+	NA	NA	NA	NA	NA	NA	A	A	A	R	G	A	A	A	R	R	R	A	R	R	R	A	R	A	A	R	A	A	R	R	A	R	R	R	A	A	A	R	A	G	R	R	R	R	A
S11_1402507	C/T	11	1402507	+	NA	NA	NA	NA	NA	NA	C	C	C	C	C	C	C	C	T	N	Y	N	Y	C	N	C	Y	C	C	Y	C	C	T	T	C	Y	C	Y	C	C	C	T	C	Y	Y	Y	C	Y	C
S11_1402633	T/A	11	1402633	+	NA	NA	NA	NA	NA	NA	T	T	T	W	T	T	W	T	A	N	W	T	W	W	A	T	W	T	T	T	T	T	W	W	T	W	W	N	T	T	T	W	T	N	W	W	W	W	T
S11_1402734	C/A	11	1402734	+	NA	NA	NA	NA	NA	NA	N	C	C	C	C	N	C	C	C	C	C	C	C	C	C	C	C	C	C	C	C	C	C	C	C	C	C	C	C	C	C	C	C	C	C	C	C	C	C
S11_1421615	A/C	11	1421615	+	NA	NA	NA	NA	NA	NA	A	A	A	M	N	A	M	A	M	M	M	A	M	M	M	A	M	A	A	M	A	A	M	M	A	M	M	M	A	A	A	M	A	M	M	M	M	M	A
S11_1438195	C/A	11	1438195	+	NA	NA	NA	NA	NA	NA	C	C	C	M	M	C	M	C	M	M	M	C	M	M	M	C	M	C	C	M	C	C	M	M	C	M	M	M	C	C	C	M	C	M	M	M	M	M	C
S11_1438296	G/T	11	1438296	+	NA	NA	NA	NA	NA	NA	G	G	N	K	T	G	K	G	K	K	K	G	K	T	N	G	K	G	G	K	G	G	K	T	G	K	T	K	G	N	G	K	G	K	K	K	K	T	G
S11_1443494	G/A	11	1443494	+	NA	NA	NA	NA	NA	NA	G	G	G	R	G	N	G	G	R	R	R	G	R	R	G	G	R	G	G	R	G	G	R	R	G	R	A	R	G	G	G	R	G	R	R	R	R	R	G
S11_1468428	A/G	11	1468428	+	NA	NA	NA	NA	NA	NA	A	A	A	R	R	N	G	A	G	R	R	A	G	G	N	N	R	A	A	R	A	A	A	N	A	R	G	R	N	A	A	R	A	R	G	A	R	R	A
S11_1476681	C/T	11	1476681	+	NA	NA	NA	NA	NA	NA	C	C	C	Y	C	N	C	C	Y	Y	Y	C	T	Y	T	N	Y	C	C	Y	C	C	Y	Y	C	Y	Y	Y	C	C	C	C	C	C	C	Y	Y	C	C
S11_1513866	T/G	11	1513866	+	NA	NA	NA	NA	NA	NA	T	T	T	K	N	T	N	T	T	N	K	N	K	G	N	T	K	T	T	K	T	T	K	K	T	G	K	K	T	T	T	K	T	N	K	K	T	K	T
S11_1514365	G/A	11	1514365	+	NA	NA	NA	NA	NA	NA	G	G	G	R	R	G	R	G	R	R	R	G	A	R	R	G	R	G	G	R	G	G	R	R	G	R	R	R	G	G	G	R	G	R	R	R	R	R	G
S11_1528713	T/A	11	1528713	+	NA	NA	NA	NA	NA	NA	T	T	T	W	N	T	W	T	W	A	A	T	T	A	T	T	A	T	T	W	N	T	W	W	T	A	T	W	T	T	T	A	T	W	N	W	T	T	T
S11_1528816	G/T	11	1528816	+	NA	NA	NA	NA	NA	NA	G	G	G	K	G	N	T	G	G	N	K	G	K	N	N	N	K	G	G	K	G	G	K	G	G	K	K	G	G	G	G	G	G	K	K	K	N	T	G
S11_1528974	A/G	11	1528974	+	NA	NA	NA	NA	NA	NA	A	A	A	R	G	A	R	A	G	R	R	A	R	R	A	A	R	A	A	R	A	A	R	R	A	R	R	R	A	A	A	R	A	R	R	A	R	R	A
S11_1536111	C/T	11	1536111	+	NA	NA	NA	NA	NA	NA	C	C	C	Y	Y	N	Y	C	Y	Y	Y	C	Y	Y	Y	C	Y	C	C	Y	C	C	Y	Y	C	Y	Y	Y	C	C	C	Y	C	Y	Y	Y	Y	Y	C
S11_1548257	C/G	11	1548257	+	NA	NA	NA	NA	NA	NA	C	C	C	S	S	C	S	C	S	S	S	C	S	S	S	C	S	C	C	C	C	C	S	S	C	S	S	S	C	C	C	S	C	S	S	S	S	S	C
S11_1548378	T/A	11	1548378	+	NA	NA	NA	NA	NA	NA	T	T	T	W	T	T	T	T	W	W	W	T	W	W	N	T	W	T	T	T	T	T	W	W	T	W	W	W	T	T	T	W	T	W	W	W	W	W	T
S11_1566763	T/G	11	1566763	+	NA	NA	NA	NA	NA	NA	T	T	T	K	K	T	K	T	K	K	K	T	K	K	K	T	K	T	T	T	T	T	K	K	T	K	K	K	T	T	T	K	T	K	K	K	K	K	T
S11_1575453	G/A	11	1575453	+	NA	NA	NA	NA	NA	NA	N	G	G	R	G	G	R	G	R	G	R	G	A	R	N	G	R	G	G	G	G	G	R	R	G	R	R	R	N	G	G	G	G	R	R	G	R	R	G
S11_1584357	T/A	11	1584357	+	NA	NA	NA	NA	NA	NA	T	T	T	W	W	T	W	T	W	W	W	T	W	W	W	T	W	T	T	T	T	T	W	W	T	W	W	W	T	T	T	W	T	W	W	W	W	W	T
S11_1589293	C/G	11	1589293	+	NA	NA	NA	NA	NA	NA	C	C	C	C	C	N	S	C	C	S	S	C	S	S	C	C	S	C	C	C	C	C	S	C	C	S	S	S	C	C	C	C	C	S	S	S	S	S	C
S11_1593207	C/T	11	1593207	+	NA	NA	NA	NA	NA	NA	C	C	C	C	C	N	C	C	C	C	C	C	C	C	C	C	C	C	C	C	C	C	C	Y	C	C	C	C	C	C	C	Y	C	C	C	C	C	C	C
S11_1600126	C/G	11	1600126	+	NA	NA	NA	NA	NA	NA	C	C	N	C	N	C	S	C	C	S	C	C	C	G	N	C	G	C	C	C	N	C	S	C	C	C	S	G	N	N	C	G	C	S	S	S	S	G	C
S11_1604912	A/T	11	1604912	+	NA	NA	NA	NA	NA	NA	N	A	A	A	T	A	A	A	A	A	A	A	A	A	T	A	A	A	A	A	A	A	A	T	A	A	A	A	A	A	A	W	N	A	A	A	A	A	A
S11_1661920	G/A	11	1661920	+	NA	NA	NA	NA	NA	NA	G	R	G	R	G	N	G	G	G	N	G	R	G	G	G	G	G	G	R	R	G	G	G	G	R	G	G	G	A	R	G	G	R	G	G	G	G	G	G
S11_1683469	A/G	11	1683469	+	NA	NA	NA	NA	NA	NA	A	A	A	A	R	A	R	A	R	R	R	A	A	R	R	A	R	A	R	A	A	A	R	R	A	R	R	R	A	A	A	R	R	R	R	R	R	R	A
S11_1753499	A	11	1753499	+	NA	NA	NA	NA	NA	NA	A	A	A	A	A	A	A	A	A	A	A	A	A	A	A	A	A	A	A	A	A	A	A	A	A	A	A	A	A	A	A	A	A	A	A	A	A	A	A
S11_1760066	A/G	11	1760066	+	NA	NA	NA	NA	NA	NA	A	A	R	A	N	A	R	R	R	R	R	R	R	R	R	R	R	A	R	R	A	R	R	R	A	A	R	R	A	A	R	R	R	R	R	R	R	R	R
S11_2026036	T/G	11	2026036	+	NA	NA	NA	NA	NA	NA	T	T	T	T	N	T	T	T	T	T	T	T	T	T	T	T	T	T	T	T	T	T	T	T	T	T	T	T	T	T	T	T	T	T	T	T	T	T	T
S11_2056084	G/A	11	2056084	+	NA	NA	NA	NA	NA	NA	R	R	R	R	R	R	R	R	R	R	R	R	R	R	G	R	R	R	R	G	R	R	R	R	R	G	G	R	R	R	R	G	R	R	R	R	R	R	R
S11_2056208	C/G	11	2056208	+	NA	NA	NA	NA	NA	NA	C	C	C	C	C	C	C	C	C	C	C	C	C	C	C	C	C	C	C	C	C	C	C	C	C	C	C	C	C	C	C	C	C	C	C	C	C	C	C
S11_2109162	C/A	11	2109162	+	NA	NA	NA	NA	NA	NA	C	C	C	C	M	C	M	C	M	M	M	C	M	A	N	C	M	C	C	C	C	C	M	M	C	M	M	M	N	C	C	M	C	M	M	M	M	M	C
S11_2109264	A/T	11	2109264	+	NA	NA	NA	NA	NA	NA	A	A	A	A	W	A	W	A	W	W	W	A	W	W	A	A	W	A	A	A	A	A	W	W	A	W	W	W	A	A	A	W	A	W	W	W	W	W	A
S11_2111506	T/A	11	2111506	+	NA	NA	NA	NA	NA	NA	T	T	T	T	N	T	T	T	T	T	T	T	T	T	T	T	T	T	T	T	T	T	T	T	T	T	T	T	T	T	T	T	T	T	T	T	T	N	T
S11_2121442	C/G	11	2121442	+	NA	NA	NA	NA	NA	NA	C	C	C	C	G	C	S	C	S	S	S	C	S	S	S	C	S	C	C	C	C	C	S	S	C	S	S	S	C	C	C	S	C	S	S	S	S	S	C
S11_2121595	A/G	11	2121595	+	NA	NA	NA	NA	NA	NA	A	A	A	A	N	A	R	A	R	R	R	A	R	R	G	A	R	A	A	A	A	A	R	R	A	R	R	G	A	A	A	A	A	R	R	R	R	R	A
S11_2121803	T/C	11	2121803	+	NA	NA	NA	NA	NA	NA	T	T	T	T	N	T	Y	T	C	Y	Y	T	Y	Y	Y	T	Y	T	T	T	T	T	Y	Y	T	Y	Y	Y	T	T	T	Y	T	Y	Y	Y	Y	Y	T
S11_2130811	G/A	11	2130811	+	NA	NA	NA	NA	NA	NA	G	G	G	G	R	G	R	G	R	R	R	G	R	R	R	G	R	G	G	G	G	G	R	R	G	R	R	R	G	G	G	R	G	R	R	R	R	R	G
S11_2131096	T/G	11	2131096	+	NA	NA	NA	NA	NA	NA	T	T	T	T	K	T	K	T	K	K	K	T	K	K	K	T	K	T	T	T	T	T	K	K	T	K	K	K	T	T	T	K	T	K	K	K	K	K	T
S11_2134740	G/C	11	2134740	+	NA	NA	NA	NA	NA	NA	G	G	G	G	S	G	S	G	S	S	S	G	S	S	S	G	S	G	G	G	G	G	S	S	G	S	S	S	G	G	G	S	G	S	S	S	S	S	G
S11_2141012	G/A	11	2141012	+	NA	NA	NA	NA	NA	NA	G	G	G	G	N	G	R	G	R	R	R	G	R	R	R	G	R	G	G	G	G	G	R	R	G	R	R	R	G	G	G	R	G	R	R	R	R	R	G
S11_2173054	C/T	11	2173054	+	NA	NA	NA	NA	NA	NA	N	C	C	C	Y	C	C	C	Y	T	Y	C	T	C	N	C	T	N	C	C	C	C	Y	Y	C	T	Y	Y	C	C	C	Y	C	Y	T	Y	Y	Y	C
S11_2173154	A/G	11	2173154	+	NA	NA	NA	NA	NA	NA	A	A	N	A	N	A	A	A	A	N	R	A	G	R	A	A	R	A	A	A	A	A	R	R	A	R	R	R	A	A	A	R	A	G	R	R	R	R	A
S11_2184402	G/T	11	2184402	+	NA	NA	NA	NA	NA	NA	G	G	G	G	K	G	K	G	K	K	K	G	K	K	K	G	K	G	G	G	G	G	K	K	G	K	K	K	G	G	G	K	G	T	K	K	K	K	G
S11_2267282	A/T	11	2267282	+	NA	NA	NA	NA	NA	NA	A	A	A	A	A	A	W	A	T	W	W	A	A	A	N	A	W	A	A	A	A	A	W	W	A	W	W	W	A	A	A	W	A	W	W	W	A	W	A
S11_2275451	G/C	11	2275451	+	NA	NA	NA	NA	NA	NA	G	G	G	G	G	G	G	G	G	G	S	G	G	G	G	G	G	G	G	G	G	G	G	G	G	S	G	G	G	G	G	G	G	N	S	G	G	S	G
S11_2287690	T/A	11	2287690	+	NA	NA	NA	NA	NA	NA	T	T	T	T	W	T	W	T	W	W	W	T	T	W	W	T	W	T	T	T	T	T	W	W	T	W	W	W	T	T	T	W	T	W	W	W	W	W	T
S11_2288704	T/C	11	2288704	+	NA	NA	NA	NA	NA	NA	T	T	T	T	Y	T	Y	T	Y	Y	Y	T	T	Y	Y	T	Y	T	T	T	T	T	Y	Y	T	Y	Y	Y	T	T	T	Y	T	Y	Y	Y	Y	Y	T
S11_2289383	T/C	11	2289383	+	NA	NA	NA	NA	NA	NA	T	T	T	T	C	T	Y	T	Y	Y	Y	T	T	Y	N	T	Y	T	T	T	T	T	Y	Y	T	Y	Y	Y	T	T	T	T	T	Y	Y	Y	Y	Y	T
S11_2294859	C/T	11	2294859	+	NA	NA	NA	NA	NA	NA	C	C	C	C	Y	C	Y	C	Y	Y	C	C	C	Y	Y	C	Y	C	C	C	C	C	Y	Y	C	C	Y	Y	C	C	C	Y	C	Y	C	Y	Y	C	C
S11_2359195	T/C	11	2359195	+	NA	NA	NA	NA	NA	NA	T	T	T	T	T	T	T	T	T	T	Y	T	T	T	N	T	T	T	T	T	T	T	T	T	T	N	T	T	T	T	T	N	T	T	Y	T	T	T	T
S11_2396451	A/G	11	2396451	+	NA	NA	NA	NA	NA	NA	A	A	A	A	G	A	R	A	G	R	R	A	A	R	G	A	R	A	A	A	A	A	R	R	A	R	R	R	A	A	A	R	A	R	R	R	R	G	A
S11_2399073	C/T	11	2399073	+	NA	NA	NA	NA	NA	NA	C	C	C	C	C	C	C	C	Y	Y	Y	C	C	Y	C	C	Y	C	C	C	C	C	Y	Y	C	Y	C	Y	C	N	C	Y	C	Y	Y	Y	Y	Y	C
S11_2421723	C/T	11	2421723	+	NA	NA	NA	NA	NA	NA	C	C	C	C	C	C	Y	C	Y	Y	Y	C	C	Y	C	C	Y	C	C	C	C	C	Y	Y	C	Y	Y	Y	C	C	C	Y	C	Y	Y	Y	Y	Y	C
S11_2454247	A/G	11	2454247	+	NA	NA	NA	NA	NA	NA	A	A	A	A	R	A	R	A	R	R	R	A	A	R	R	A	A	A	A	A	A	A	R	R	A	R	A	G	A	A	A	R	A	R	R	R	R	R	A
S11_2454664	G/C	11	2454664	+	NA	NA	NA	NA	NA	NA	G	G	G	G	S	G	S	G	S	S	G	G	G	S	G	G	S	G	G	G	G	G	S	S	G	G	S	S	G	G	G	S	G	S	G	S	S	G	G
S11_2475443	C/A	11	2475443	+	NA	NA	NA	NA	NA	NA	C	C	C	C	M	C	M	C	M	M	M	C	C	M	A	C	M	C	C	C	C	C	M	M	C	M	M	M	C	C	C	C	C	M	M	M	M	C	C
S11_2491387	G/C	11	2491387	+	NA	NA	NA	NA	NA	NA	G	G	G	G	G	G	G	G	G	G	G	G	G	G	N	G	G	G	G	G	G	G	G	G	G	G	G	G	G	G	G	G	G	G	G	G	G	G	G
S11_2491516	A/G	11	2491516	+	NA	NA	NA	NA	NA	NA	A	A	A	A	R	A	R	A	R	R	R	A	A	R	R	A	R	A	A	A	R	A	R	R	A	R	R	R	A	A	A	R	A	R	R	R	R	R	A
S11_2546360	A/G	11	2546360	+	NA	NA	NA	NA	NA	NA	A	A	A	A	G	A	R	A	R	R	R	A	A	R	G	A	G	A	A	A	G	A	R	R	A	R	A	R	A	N	A	R	A	R	R	R	R	R	A
S11_2571063	C/A	11	2571063	+	NA	NA	NA	NA	NA	NA	N	C	C	C	A	C	M	C	C	C	M	C	C	M	N	C	C	C	C	C	C	C	M	C	C	C	M	C	C	C	C	A	N	N	M	M	M	C	C
S11_2576114	G/T	11	2576114	+	NA	NA	NA	NA	NA	NA	G	G	G	G	G	N	K	G	T	K	K	G	G	K	N	G	K	G	G	G	G	G	K	K	G	T	K	K	G	G	G	K	G	K	K	K	K	T	G
S11_2583115	G/C	11	2583115	+	NA	NA	NA	NA	NA	NA	G	G	G	G	N	G	C	G	G	N	G	G	G	S	N	N	S	G	G	S	S	G	S	G	G	G	C	S	G	G	G	G	G	S	G	S	S	G	G
S11_2583217	A/T	11	2583217	+	NA	NA	NA	NA	NA	NA	A	A	A	A	W	N	W	A	W	A	T	A	A	W	T	A	T	A	A	A	A	A	W	W	A	W	T	N	N	A	A	N	A	T	W	A	W	A	A
S11_2583406	C/T	11	2583406	+	NA	NA	NA	NA	NA	NA	C	C	C	C	N	N	Y	C	T	Y	Y	C	C	Y	C	C	N	N	C	C	C	N	Y	Y	C	Y	Y	C	C	C	C	C	C	Y	Y	Y	Y	C	C
S11_2587150	C/T	11	2587150	+	NA	NA	NA	NA	NA	NA	C	C	C	C	T	C	Y	C	C	T	Y	C	C	Y	N	C	Y	C	C	C	C	C	Y	Y	C	Y	Y	Y	C	C	C	Y	C	N	Y	Y	Y	Y	C
S11_2596622	A/C	11	2596622	+	NA	NA	NA	NA	NA	NA	A	A	A	A	N	A	C	A	C	N	M	N	A	M	N	A	N	A	A	A	A	A	M	M	A	M	A	M	A	N	A	A	A	N	C	M	A	M	A
S11_2640061	A/G	11	2640061	+	NA	NA	NA	NA	NA	NA	R	R	R	R	R	R	R	R	R	R	R	R	R	R	R	R	R	R	R	R	R	R	R	R	R	R	R	R	R	R	R	R	R	R	R	R	R	R	R
S11_2651483	T/C	11	2651483	+	NA	NA	NA	NA	NA	NA	T	T	T	T	Y	T	Y	T	Y	Y	Y	T	T	Y	Y	T	Y	T	T	T	T	T	Y	Y	T	Y	Y	Y	T	T	T	Y	T	Y	Y	Y	Y	Y	T
S11_2672533	G/C	11	2672533	+	NA	NA	NA	NA	NA	NA	G	G	G	G	C	N	S	G	N	C	S	G	G	G	N	G	S	G	G	G	S	G	S	G	G	S	S	S	G	G	G	G	G	G	S	G	S	C	G
S11_2711889	T/C	11	2711889	+	NA	NA	NA	NA	NA	NA	T	T	Y	T	Y	T	Y	T	Y	Y	Y	T	T	Y	Y	T	Y	T	T	T	Y	T	Y	Y	T	Y	Y	Y	T	T	T	Y	T	Y	Y	Y	Y	Y	T
S11_2724454	G/A	11	2724454	+	NA	NA	NA	NA	NA	NA	G	G	N	G	N	G	R	G	R	G	R	G	G	R	N	G	R	G	G	G	G	G	R	R	G	R	R	G	N	N	G	R	G	R	G	R	G	A	G
S11_2728725	A/G	11	2728725	+	NA	NA	NA	NA	NA	NA	A	A	A	A	N	A	R	A	R	R	R	A	A	R	R	A	R	A	A	A	R	A	R	R	A	R	G	R	A	A	A	R	A	R	A	R	R	R	A
S11_2728837	T/C	11	2728837	+	NA	NA	NA	NA	NA	NA	T	T	T	T	Y	T	Y	T	Y	Y	Y	T	T	Y	C	T	Y	T	T	T	Y	T	Y	Y	T	Y	T	Y	T	T	T	Y	T	C	Y	Y	Y	Y	T
S11_2728938	A/G	11	2728938	+	NA	NA	NA	NA	NA	NA	A	A	A	A	N	A	R	A	R	R	R	A	A	R	R	A	R	N	A	A	A	A	R	R	A	R	R	R	A	A	A	R	A	G	R	R	R	R	A
S11_2748361	G/A	11	2748361	+	NA	NA	NA	NA	NA	NA	G	G	G	G	R	G	R	G	R	R	R	G	G	R	R	G	R	G	G	G	G	G	R	R	G	R	R	R	G	G	G	R	G	R	R	R	R	R	G
S11_2758318	T/C	11	2758318	+	NA	NA	NA	NA	NA	NA	T	T	T	T	Y	T	Y	T	Y	Y	Y	T	T	Y	C	T	Y	T	T	T	T	T	Y	Y	T	Y	Y	Y	T	T	T	Y	T	Y	Y	Y	Y	Y	T
S11_2761702	A/C	11	2761702	+	NA	NA	NA	NA	NA	NA	A	A	A	A	M	A	M	A	M	C	M	A	A	M	C	A	M	A	A	A	C	A	M	M	A	M	M	M	A	A	A	M	A	M	M	M	M	M	A
S11_2779390	G/C	11	2779390	+	NA	NA	NA	NA	NA	NA	G	G	G	G	S	G	G	G	S	S	G	G	G	G	G	G	S	G	G	G	G	G	G	S	G	S	S	S	G	G	G	G	G	G	G	S	G	G	G
S11_2791491	T/C	11	2791491	+	NA	NA	NA	NA	NA	NA	T	T	T	T	Y	T	Y	T	Y	Y	Y	T	T	Y	Y	T	Y	T	T	T	Y	T	Y	Y	T	Y	Y	Y	T	T	T	Y	T	Y	Y	Y	Y	Y	T
S11_2795923	G/A	11	2795923	+	NA	NA	NA	NA	NA	NA	G	G	G	G	N	G	G	G	G	R	R	G	G	A	N	N	R	G	G	G	N	G	R	R	G	R	R	G	G	G	G	G	G	R	G	R	G	R	G
S11_2801296	T/A	11	2801296	+	NA	NA	NA	NA	NA	NA	T	T	T	T	W	T	A	T	W	T	W	T	T	W	N	T	W	T	T	T	T	T	W	W	T	W	T	W	N	T	T	N	T	T	W	W	W	W	T
S11_2801397	T/C	11	2801397	+	NA	NA	NA	NA	NA	NA	T	T	T	T	C	T	T	T	Y	T	Y	T	T	T	T	T	T	T	T	T	T	T	T	Y	T	Y	T	N	T	T	T	Y	T	T	Y	T	T	Y	T
S11_2807151	T/A	11	2807151	+	NA	NA	NA	NA	NA	NA	T	T	T	T	N	T	W	T	W	W	W	T	T	W	A	T	W	T	T	T	T	T	W	W	T	W	W	W	T	T	T	W	T	W	W	W	W	T	T
S11_2808792	G/A	11	2808792	+	NA	NA	NA	NA	NA	NA	G	G	G	G	N	G	R	G	G	G	R	N	G	A	N	G	R	G	G	G	G	G	R	R	G	R	R	G	G	G	G	N	G	G	R	R	R	A	G
S11_2808927	G/T	11	2808927	+	NA	NA	NA	NA	NA	NA	G	G	G	G	K	G	K	G	K	K	K	G	G	K	K	G	K	G	G	G	G	G	K	K	G	K	K	K	G	G	G	K	G	K	K	K	K	K	G
S11_2809530	G/A	11	2809530	+	NA	NA	NA	NA	NA	NA	G	G	G	G	G	N	R	G	R	G	G	G	G	R	N	G	R	G	G	G	R	G	R	G	G	G	R	A	G	G	G	G	G	G	G	R	R	N	G
S11_2809640	C/T	11	2809640	+	NA	NA	NA	NA	NA	NA	C	C	C	C	N	C	Y	C	Y	T	C	C	C	Y	N	N	Y	C	C	C	C	C	Y	C	C	C	T	Y	C	N	C	N	C	C	C	Y	Y	C	C
S11_2812023	T/C	11	2812023	+	NA	NA	NA	NA	NA	NA	T	T	T	T	N	N	Y	T	C	T	T	T	T	T	T	T	Y	T	T	T	T	T	Y	T	N	T	Y	T	N	T	T	N	T	Y	T	Y	Y	N	T
S11_2814221	T/C	11	2814221	+	NA	NA	NA	NA	NA	NA	T	T	T	T	Y	N	Y	T	T	Y	Y	T	T	Y	T	T	Y	N	N	T	T	T	Y	C	T	Y	Y	Y	T	T	T	Y	T	T	Y	Y	Y	Y	T
S11_2821598	T/C	11	2821598	+	NA	NA	NA	NA	NA	NA	T	T	T	T	Y	T	Y	T	Y	Y	Y	T	T	Y	Y	T	Y	T	T	T	T	T	Y	Y	T	Y	Y	Y	T	T	T	Y	T	Y	Y	Y	Y	Y	T
S11_2834622	T/G	11	2834622	+	NA	NA	NA	NA	NA	NA	T	T	T	T	K	T	T	T	T	T	K	T	T	T	T	T	T	T	T	T	T	T	T	K	T	K	T	T	T	T	T	G	T	T	K	T	T	K	T
S11_2842014	C/A	11	2842014	+	NA	NA	NA	NA	NA	NA	C	C	C	C	M	C	M	C	M	M	M	C	C	M	N	C	M	C	C	C	M	C	M	M	C	M	M	M	C	C	C	M	C	M	M	M	M	M	C
S11_2858842	A/T	11	2858842	+	NA	NA	NA	NA	NA	NA	A	A	W	A	W	N	W	A	W	A	W	A	A	W	T	A	W	A	A	A	A	A	W	W	A	W	W	W	A	A	A	W	A	W	W	W	W	W	A
S11_2858949	C/A	11	2858949	+	NA	NA	NA	NA	NA	NA	C	C	C	C	N	C	M	C	M	A	M	C	C	M	N	C	M	C	C	C	C	C	M	M	C	M	M	C	C	C	C	M	C	M	M	M	M	M	C
S11_2871879	C/G	11	2871879	+	NA	NA	NA	NA	NA	NA	C	C	C	C	C	C	S	C	N	N	C	C	C	S	N	C	S	C	C	C	S	C	S	C	C	C	S	N	C	C	C	C	C	C	C	S	S	C	C
S11_2872002	T/C	11	2872002	+	NA	NA	NA	NA	NA	NA	T	T	T	T	Y	T	Y	T	N	C	Y	T	T	T	T	T	Y	T	T	T	T	T	Y	Y	T	Y	C	Y	T	T	T	T	N	Y	Y	Y	C	Y	T
S11_2872120	G/T	11	2872120	+	NA	NA	NA	NA	NA	NA	G	G	G	G	T	N	G	G	G	G	K	G	G	G	G	G	G	G	G	G	G	G	G	K	G	K	G	G	G	G	G	K	G	G	G	G	G	K	G
S11_2881630	T/C	11	2881630	+	NA	NA	NA	NA	NA	NA	T	T	T	T	T	T	T	T	N	T	T	T	T	N	T	T	T	T	T	T	T	T	T	T	T	T	T	T	T	T	T	T	T	T	T	T	T	T	T
S11_2892250	T/C	11	2892250	+	NA	NA	NA	NA	NA	NA	T	T	T	T	Y	T	Y	T	Y	Y	Y	T	T	Y	Y	T	Y	T	T	T	Y	T	Y	Y	T	Y	Y	Y	T	T	T	Y	T	Y	Y	Y	Y	Y	T
S11_2894034	G/T	11	2894034	+	NA	NA	NA	NA	NA	NA	G	G	G	G	G	G	G	G	G	G	G	G	G	G	G	G	G	G	G	G	G	G	G	G	G	G	G	G	G	G	G	G	G	G	G	G	G	G	G
S11_2894174	A/C	11	2894174	+	NA	NA	NA	NA	NA	NA	A	A	A	A	M	N	A	A	A	A	M	A	A	A	N	A	A	A	A	A	A	A	A	M	A	M	A	A	A	A	A	M	A	A	M	A	A	M	A
S11_2895863	A/T	11	2895863	+	NA	NA	NA	NA	NA	NA	A	A	A	A	A	A	W	A	W	W	W	A	A	W	T	A	W	A	A	A	W	A	W	W	A	W	W	W	A	A	A	T	A	W	W	W	W	W	A
S11_2905405	G/C	11	2905405	+	NA	NA	NA	NA	NA	NA	G	G	G	G	G	N	G	G	G	N	G	G	G	N	G	G	G	G	G	G	G	G	G	G	G	N	G	G	G	N	G	G	G	G	G	G	G	N	G
S11_2912464	G/A	11	2912464	+	NA	NA	NA	NA	NA	NA	G	G	G	G	G	N	R	G	R	G	G	G	G	G	N	G	R	G	G	G	R	G	R	G	G	G	R	R	G	G	G	G	G	A	G	R	R	G	G
S11_2913196	T/C	11	2913196	+	NA	NA	NA	NA	NA	NA	T	T	T	T	T	T	T	T	T	T	T	T	T	T	T	T	T	T	T	T	T	T	T	T	T	T	T	T	T	T	T	T	T	T	T	T	T	T	T
S11_2916654	A/G	11	2916654	+	NA	NA	NA	NA	NA	NA	A	A	A	A	R	A	R	A	R	R	R	A	A	R	A	A	R	A	A	A	R	A	R	R	A	R	R	R	A	A	A	R	A	R	R	R	R	R	A
S11_2917858	C/G	11	2917858	+	NA	NA	NA	NA	NA	NA	C	C	C	C	G	C	S	C	S	S	S	C	C	S	C	C	S	C	C	C	C	C	S	S	C	S	S	S	C	C	C	S	C	S	S	S	G	S	C
S11_2917961	T/C	11	2917961	+	NA	NA	NA	NA	NA	NA	T	T	T	T	T	T	Y	T	Y	T	N	T	T	Y	N	N	Y	T	T	T	T	T	Y	Y	T	Y	T	Y	T	T	T	C	T	T	Y	Y	T	Y	T
S11_2918079	A/G	11	2918079	+	NA	NA	NA	NA	NA	NA	A	A	A	A	N	N	R	A	R	R	R	N	A	R	N	A	R	A	A	A	R	A	R	R	A	G	R	G	A	A	A	R	A	R	R	R	G	R	A
S11_2918189	G/A	11	2918189	+	NA	NA	NA	NA	NA	NA	G	G	G	G	A	G	R	G	R	G	R	G	G	R	N	N	G	G	G	G	G	G	R	R	G	A	R	A	G	G	G	A	G	G	R	R	A	R	G
S11_2997093	C/T	11	2997093	+	NA	NA	NA	NA	NA	NA	N	C	C	C	N	N	Y	C	Y	C	Y	C	C	Y	N	C	T	C	C	C	C	C	Y	C	C	Y	Y	Y	C	N	C	Y	C	T	Y	Y	C	N	C
S11_3006344	C/T	11	3006344	+	NA	NA	NA	NA	NA	NA	N	C	C	C	C	C	C	C	N	Y	T	C	C	T	N	C	T	C	N	C	C	C	T	Y	C	Y	T	Y	N	C	C	Y	C	T	Y	Y	Y	C	C
S11_3016907	T/G	11	3016907	+	NA	NA	NA	NA	NA	NA	T	T	T	T	G	T	G	T	N	G	K	T	T	T	N	T	T	T	T	T	T	T	K	K	T	K	K	G	T	T	T	G	N	N	T	K	T	T	T
S11_3017016	T/C	11	3017016	+	NA	NA	NA	NA	NA	NA	T	T	T	T	T	N	C	T	T	C	Y	T	T	Y	C	T	C	T	T	T	T	T	Y	Y	T	Y	Y	T	T	T	T	C	T	Y	Y	Y	Y	Y	T
S11_3023535	A/T	11	3023535	+	NA	NA	NA	NA	NA	NA	A	A	A	A	A	A	W	A	W	W	W	A	A	W	W	A	W	A	A	A	A	A	W	W	A	W	W	W	A	A	A	W	A	W	W	W	T	A	A
S11_3024659	T/A	11	3024659	+	NA	NA	NA	NA	NA	NA	T	T	T	T	N	N	W	T	T	A	W	T	T	W	N	T	W	T	T	T	T	T	W	W	T	W	W	W	N	N	N	A	T	T	W	W	W	T	T
S11_3051256	T/C	11	3051256	+	NA	NA	NA	NA	NA	NA	T	T	T	T	Y	T	Y	T	Y	Y	Y	T	T	Y	C	T	Y	T	T	T	T	T	Y	Y	T	Y	Y	Y	T	T	T	Y	T	Y	Y	Y	C	Y	T
S11_3051909	G/A	11	3051909	+	NA	NA	NA	NA	NA	NA	G	G	G	G	G	G	G	G	G	G	G	G	G	G	N	G	G	G	G	G	G	G	G	G	G	G	G	G	G	G	G	G	G	G	G	G	G	G	G
S11_3052112	C/T	11	3052112	+	NA	NA	NA	NA	NA	NA	N	C	C	C	N	N	Y	C	Y	C	Y	C	C	C	N	N	C	C	C	C	C	C	T	Y	C	Y	Y	T	C	C	C	Y	C	T	Y	Y	Y	Y	C
S11_3053551	G/C	11	3053551	+	NA	NA	NA	NA	NA	NA	G	G	G	G	C	G	S	G	S	S	S	G	G	S	S	G	S	G	G	G	S	G	S	S	G	S	S	S	G	G	G	C	G	C	S	S	S	S	G
S11_3087303	G/A	11	3087303	+	NA	NA	NA	NA	NA	NA	G	G	G	G	R	G	R	G	R	R	R	G	G	R	R	G	R	G	G	G	G	G	R	R	G	R	R	R	G	G	G	R	G	R	R	R	R	R	G
S11_3114164	A/G	11	3114164	+	NA	NA	NA	NA	NA	NA	A	A	A	A	R	A	A	A	A	A	R	A	A	A	A	A	A	A	A	A	A	A	A	R	A	R	A	A	A	A	A	R	A	A	R	A	A	R	A
S11_3122437	A/G	11	3122437	+	NA	NA	NA	NA	NA	NA	A	A	A	A	A	A	N	A	G	G	A	A	N	A	A	N	R	A	A	A	A	A	R	A	A	A	R	G	A	A	A	A	A	G	A	R	R	A	A
S11_3123502	C/G	11	3123502	+	NA	NA	NA	NA	NA	NA	C	C	C	C	S	C	S	C	S	S	S	C	C	S	S	C	S	C	C	C	S	C	S	S	C	S	S	S	C	C	C	S	C	S	S	S	S	S	C
S11_3129560	A/G	11	3129560	+	NA	NA	NA	NA	NA	NA	N	A	A	A	G	A	R	A	N	R	R	A	A	N	N	A	G	A	A	A	A	A	R	R	A	A	A	A	A	A	A	G	A	G	R	R	N	A	A
S11_3130061	T/G	11	3130061	+	NA	NA	NA	NA	NA	NA	T	T	T	T	G	T	K	T	K	K	K	T	T	K	N	T	K	T	T	T	T	T	K	K	T	K	K	K	T	T	T	K	T	T	K	K	K	K	T
S11_3141500	G/A	11	3141500	+	NA	NA	NA	NA	NA	NA	G	G	G	G	R	G	R	G	R	R	R	G	G	R	R	G	R	G	G	G	R	G	R	R	G	R	R	R	G	G	G	R	G	R	R	R	R	R	G
S11_3143441	T/G	11	3143441	+	NA	NA	NA	NA	NA	NA	T	T	T	T	K	T	T	T	T	T	K	T	T	T	N	T	T	T	T	T	T	T	T	K	T	K	T	T	T	T	T	K	T	T	K	T	T	K	T
S11_3176648	C/T	11	3176648	+	NA	NA	NA	NA	NA	NA	C	C	C	C	Y	C	C	C	C	C	Y	C	C	C	N	C	C	C	C	C	C	C	C	Y	C	Y	C	C	C	C	C	Y	C	C	Y	C	C	Y	C
S11_3176750	A/C	11	3176750	+	NA	NA	NA	NA	NA	NA	A	A	A	A	C	N	A	A	A	A	M	A	A	A	N	A	A	A	A	A	A	A	A	C	A	M	A	A	A	A	A	M	A	A	M	A	A	M	A
S11_3183354	G/T	11	3183354	+	NA	NA	NA	NA	NA	NA	G	G	K	G	K	G	K	G	K	K	K	G	G	K	G	G	K	G	G	G	K	G	K	K	G	K	K	K	G	G	G	K	G	K	K	K	K	G	G
S11_3183463	A/T	11	3183463	+	NA	NA	NA	NA	NA	NA	A	A	A	A	W	A	W	A	W	W	W	A	A	W	W	A	W	A	A	A	W	A	W	W	A	W	W	W	A	A	A	W	A	W	W	W	W	W	A
S11_3183582	C/A	11	3183582	+	NA	NA	NA	NA	NA	NA	C	C	M	C	N	C	M	C	M	M	M	C	C	M	C	C	M	C	C	C	M	C	M	M	C	M	M	M	N	C	C	C	C	M	M	M	M	M	C
S11_3200711	T/G	11	3200711	+	NA	NA	NA	NA	NA	NA	K	K	K	K	T	K	K	K	K	K	K	K	K	K	K	K	K	K	K	K	K	K	K	K	K	K	K	K	K	K	K	G	K	K	K	K	K	K	K
S11_3202170	A/G	11	3202170	+	NA	NA	NA	NA	NA	NA	A	A	A	A	A	N	R	A	R	G	A	A	A	R	N	A	R	A	A	A	A	A	R	A	A	A	G	R	A	A	A	A	A	R	A	R	R	A	A
S11_3220821	T/G	11	3220821	+	NA	NA	NA	NA	NA	NA	T	T	K	T	T	T	T	T	T	T	T	T	T	T	T	T	T	T	T	T	T	T	T	T	T	T	T	T	T	T	T	T	T	T	T	T	T	T	T
S11_3224802	A/C	11	3224802	+	NA	NA	NA	NA	NA	NA	M	M	M	M	M	M	M	M	M	M	M	M	M	M	M	M	M	M	M	M	M	M	M	M	M	M	M	M	M	M	M	M	M	M	M	M	M	M	M
S11_3237093	A/C	11	3237093	+	NA	NA	NA	NA	NA	NA	A	A	A	A	A	A	A	A	A	N	M	N	A	A	N	A	A	A	A	A	A	A	A	M	A	A	A	A	A	A	A	M	N	A	M	N	A	A	A
S11_3258726	G/T	11	3258726	+	NA	NA	NA	NA	NA	NA	K	K	T	K	K	K	K	K	K	K	K	K	K	K	K	K	K	K	K	K	K	K	K	K	K	K	K	K	K	K	K	K	K	K	K	K	K	K	K
S11_3262878	C/G	11	3262878	+	NA	NA	NA	NA	NA	NA	C	C	C	C	S	C	C	C	C	C	S	C	C	C	C	C	C	C	C	C	C	C	C	S	C	S	C	C	C	C	C	S	C	C	S	C	C	C	C
S11_3262982	G/A	11	3262982	+	NA	NA	NA	NA	NA	NA	G	G	G	G	A	G	R	G	G	R	R	G	G	R	G	G	R	G	G	G	G	G	R	R	G	R	R	R	G	G	G	R	G	R	R	R	R	R	G
S11_3263134	G/A	11	3263134	+	NA	NA	NA	NA	NA	NA	G	G	G	G	A	G	R	G	R	R	R	G	G	R	G	G	R	R	G	G	G	G	R	R	G	G	R	R	G	G	G	R	G	R	R	R	R	R	G
S11_3279543	A/T	11	3279543	+	NA	NA	NA	NA	NA	NA	A	A	A	A	W	A	W	A	W	W	W	A	A	W	W	A	W	A	A	A	W	A	W	W	A	W	W	W	A	A	A	W	A	W	W	W	W	W	A
S11_3340726	C/G	11	3340726	+	NA	NA	NA	NA	NA	NA	C	C	C	C	C	C	C	C	C	C	C	C	C	C	N	C	C	C	C	C	C	C	C	C	C	C	C	C	C	C	C	C	C	C	C	C	C	C	C
S11_3346168	T/A	11	3346168	+	NA	NA	NA	NA	NA	NA	T	T	T	T	T	T	T	T	T	T	W	T	T	T	T	T	T	T	T	T	N	T	T	W	T	T	T	T	T	N	T	T	T	T	W	T	T	W	T
S11_3346333	A/T	11	3346333	+	NA	NA	NA	NA	NA	NA	A	A	A	A	A	A	A	A	A	A	A	A	A	A	A	A	A	A	A	A	A	A	A	A	A	A	A	A	A	A	A	A	A	A	A	A	A	A	A
S11_3367911	C/A	11	3367911	+	NA	NA	NA	NA	NA	NA	C	C	C	C	C	C	C	C	C	C	C	C	C	C	C	C	C	C	C	C	C	C	C	C	C	C	C	C	C	C	C	C	C	C	C	C	C	C	C
S11_3454085	A/C	11	3454085	+	NA	NA	NA	NA	NA	NA	A	A	A	A	M	A	M	A	M	M	M	A	A	M	M	A	M	A	A	A	A	A	M	M	A	M	M	M	A	A	A	M	A	M	M	M	M	M	A
S11_3472475	T/C	11	3472475	+	NA	NA	NA	NA	NA	NA	T	T	T	T	Y	N	C	T	C	Y	Y	T	T	T	C	T	Y	T	T	T	Y	T	T	Y	T	Y	Y	Y	T	T	T	Y	T	Y	C	Y	Y	N	T
S11_3483071	T/A	11	3483071	+	NA	NA	NA	NA	NA	NA	T	T	T	T	T	T	T	T	T	T	T	T	T	T	T	T	T	T	T	T	T	T	T	T	T	T	T	T	T	T	T	T	T	T	T	T	T	T	T
S11_3483221	C/T	11	3483221	+	NA	NA	NA	NA	NA	NA	C	C	C	C	Y	C	Y	C	Y	C	C	C	C	C	C	C	C	C	C	C	C	C	C	C	C	C	C	C	C	C	C	C	C	Y	Y	C	T	C	C
S11_3554114	A/G	11	3554114	+	NA	NA	NA	NA	NA	NA	A	A	A	A	N	N	A	N	R	G	R	A	A	R	N	A	A	A	N	A	R	A	R	A	A	A	R	G	A	A	A	R	A	N	G	G	R	G	A
S11_3555270	C/A	11	3555270	+	NA	NA	NA	NA	NA	NA	C	C	C	C	C	C	C	C	C	C	M	C	N	C	N	C	C	C	C	C	C	C	C	M	C	M	C	C	C	C	C	M	C	C	M	C	C	M	C
S11_3555384	T/C	11	3555384	+	NA	NA	NA	NA	NA	NA	N	T	T	T	C	T	C	T	Y	Y	Y	T	T	Y	C	N	Y	T	T	T	T	T	Y	Y	T	Y	Y	C	T	T	T	Y	T	Y	T	Y	Y	T	T
S11_3557613	C/T	11	3557613	+	NA	NA	NA	NA	NA	NA	C	C	C	C	C	C	Y	C	Y	Y	C	C	C	Y	Y	C	Y	C	C	C	C	C	Y	C	C	C	Y	Y	C	C	C	C	C	Y	C	Y	Y	C	C
S11_3568690	T/C	11	3568690	+	NA	NA	NA	NA	NA	NA	T	T	T	T	T	T	Y	T	Y	C	Y	T	T	Y	N	N	Y	T	T	T	T	T	Y	Y	T	Y	C	Y	N	T	T	C	T	Y	C	Y	Y	Y	T
S11_3571676	T/C	11	3571676	+	NA	NA	NA	NA	NA	NA	T	T	T	T	Y	T	Y	T	Y	Y	Y	T	T	Y	Y	T	Y	T	T	T	Y	T	Y	Y	T	Y	Y	Y	T	T	T	Y	T	Y	Y	Y	Y	Y	T
S12_90828	G/A	12	90828	+	NA	NA	NA	NA	NA	NA	G	R	R	R	G	G	G	R	G	R	G	G	R	R	R	G	G	R	R	G	R	R	G	R	R	G	R	G	R	R	G	G	R	R	R	G	R	R	G
S12_254020	C/T	12	254020	+	NA	NA	NA	NA	NA	NA	C	Y	C	Y	C	C	C	T	C	N	C	N	Y	Y	C	C	C	T	C	C	Y	Y	C	Y	Y	C	Y	C	C	C	C	C	C	Y	Y	C	Y	Y	C
S12_436776	G/A	12	436776	+	NA	NA	NA	NA	NA	NA	G	R	G	R	G	N	G	A	G	A	G	G	R	G	N	G	G	G	R	G	A	R	G	R	R	G	R	G	G	G	G	G	R	A	R	G	R	R	G
S12_453126	A/C	12	453126	+	NA	NA	NA	NA	NA	NA	A	M	A	M	A	A	A	A	A	A	A	A	M	M	N	A	A	M	M	A	M	M	A	A	M	A	M	A	M	M	A	A	M	M	A	A	M	M	A
S13_44576	C/T	13	44576	+	NA	NA	NA	NA	NA	NA	T	Y	Y	Y	C	Y	Y	C	T	C	Y	T	Y	T	Y	C	C	N	Y	Y	C	Y	Y	Y	Y	C	C	C	C	C	Y	T	C	Y	Y	Y	C	N	C
S13_64571	T/C	13	64571	+	NA	NA	NA	NA	NA	NA	T	T	T	Y	T	Y	T	T	T	T	Y	T	Y	Y	N	Y	T	T	Y	Y	Y	T	T	T	Y	T	Y	Y	Y	Y	T	T	T	T	Y	Y	T	T	T
S15_55148	T/C	15	55148	+	NA	NA	NA	NA	NA	NA	T	T	T	T	T	T	Y	T	T	C	T	Y	T	T	N	T	T	Y	T	Y	Y	T	Y	T	T	T	Y	T	T	T	T	T	T	T	Y	T	Y	T	T
S15_68702	G/A	15	68702	+	NA	NA	NA	NA	NA	NA	G	G	G	G	R	G	R	G	G	R	R	R	G	G	N	G	G	R	G	R	R	G	R	G	G	G	R	R	G	G	G	G	G	G	R	R	R	G	G
S15_68914	T/C	15	68914	+	NA	NA	NA	NA	NA	NA	T	T	T	T	N	T	T	T	T	T	T	T	T	T	T	T	T	T	T	T	T	T	T	T	T	T	T	T	T	T	T	T	T	T	T	T	T	T	T
S15_69225	T/C	15	69225	+	NA	NA	NA	NA	NA	NA	T	T	T	T	N	T	T	T	T	Y	Y	N	T	T	T	T	T	T	T	T	T	T	Y	T	T	T	Y	Y	T	T	T	T	T	T	T	Y	T	N	T
S15_154785	G/A	15	154785	+	NA	NA	NA	NA	NA	NA	G	G	G	G	N	G	G	G	G	R	R	R	G	G	G	G	G	A	G	R	A	G	G	G	G	G	G	R	G	G	G	N	G	G	R	R	G	G	G
S15_235766	T/C	15	235766	+	NA	NA	NA	NA	NA	NA	T	T	T	T	Y	T	T	T	T	T	T	T	T	T	T	T	T	T	T	T	T	T	T	T	T	T	T	T	T	T	T	T	T	T	T	T	T	T	T
S15_255804	C/A	15	255804	+	NA	NA	NA	NA	NA	NA	N	C	C	C	M	C	M	C	C	N	A	C	C	C	N	C	C	N	C	M	M	C	M	C	C	C	M	C	C	C	C	C	N	C	M	M	M	C	C
S15_473281	C/T	15	473281	+	NA	NA	NA	NA	NA	NA	C	C	C	C	Y	C	Y	C	C	Y	Y	Y	C	C	C	C	C	Y	C	Y	Y	C	Y	C	C	C	Y	Y	C	Y	C	C	C	C	Y	Y	Y	C	C
S15_476685	C/T	15	476685	+	NA	NA	NA	NA	NA	NA	C	C	C	C	Y	C	Y	C	C	Y	Y	Y	C	C	C	C	C	Y	C	Y	Y	C	Y	C	C	C	C	Y	C	C	C	C	C	C	Y	Y	Y	C	C
S15_476835	C/T	15	476835	+	NA	NA	NA	NA	NA	NA	C	C	C	C	N	C	T	C	C	T	Y	T	C	C	N	C	C	N	N	Y	Y	C	Y	N	C	C	Y	T	C	C	C	C	C	C	C	Y	Y	C	C
S15_476956	T/C	15	476956	+	NA	NA	NA	NA	NA	NA	T	T	T	T	T	N	Y	T	T	Y	Y	C	N	T	N	N	T	C	T	Y	C	T	Y	T	T	T	T	C	T	T	T	T	T	T	Y	Y	Y	T	T
S16_106427	T/C	16	106427	+	NA	NA	NA	NA	NA	NA	T	T	Y	T	T	T	T	T	T	T	T	T	T	T	T	T	T	T	T	T	T	T	T	T	T	T	T	T	T	T	T	T	T	T	T	T	T	T	T
S16_150862	T/A	16	150862	+	NA	NA	NA	NA	NA	NA	T	T	W	T	T	T	T	T	T	T	T	T	N	T	T	T	T	T	T	T	T	T	T	T	T	T	T	T	N	T	T	T	T	T	T	T	T	T	T
S16_166650	G/T	16	166650	+	NA	NA	NA	NA	NA	NA	G	G	G	K	K	G	G	G	G	G	G	G	K	T	G	G	G	G	K	K	G	G	G	G	K	G	G	K	K	T	G	G	G	G	G	G	G	G	G
S16_174734	T/G	16	174734	+	NA	NA	NA	NA	NA	NA	T	T	K	T	T	T	T	T	T	T	T	T	T	T	T	T	T	T	T	T	T	T	T	T	T	T	T	T	T	T	T	T	T	T	T	T	T	T	T
S16_192715	C/G	16	192715	+	NA	NA	NA	NA	NA	NA	C	C	C	S	S	C	C	C	C	C	S	C	S	S	C	S	C	C	S	S	C	C	C	C	S	C	S	S	S	S	C	S	C	C	S	S	C	C	C
S16_338493	A/C	16	338493	+	NA	NA	NA	NA	NA	NA	A	A	A	A	M	N	A	A	A	N	M	A	A	A	N	A	A	A	A	A	A	A	A	A	A	A	A	A	A	N	A	M	N	A	M	A	N	A	A
S16_338599	C/A	16	338599	+	NA	NA	NA	NA	NA	NA	C	C	M	C	C	C	C	C	C	C	C	C	C	C	C	C	C	C	C	C	C	C	C	C	C	C	C	C	C	C	C	C	C	C	C	C	C	C	C
S16_437248	G/T	16	437248	+	NA	NA	NA	NA	NA	NA	G	G	K	G	G	G	G	G	G	G	G	G	G	G	G	G	G	G	G	G	G	G	G	G	G	G	G	G	G	G	G	G	G	G	G	G	G	G	G
S16_437387	A/G	16	437387	+	NA	NA	NA	NA	NA	NA	A	A	R	A	A	A	A	A	A	A	A	A	A	A	A	A	A	A	A	A	A	A	A	A	A	A	A	A	A	A	A	A	A	A	A	A	A	A	A
S16_627852	C/T	16	627852	+	NA	NA	NA	NA	NA	NA	C	Y	C	Y	Y	C	Y	Y	Y	T	Y	Y	Y	Y	N	C	Y	Y	C	Y	C	C	C	Y	Y	Y	Y	C	C	T	C	Y	Y	Y	Y	C	C	Y	Y
S16_644651	C/A	16	644651	+	NA	NA	NA	NA	NA	NA	C	C	C	A	A	C	C	C	M	C	A	N	A	A	N	M	C	C	A	M	M	C	C	C	A	C	A	A	A	A	C	A	C	C	A	A	N	C	C
S16_927380	T/A	16	927380	+	NA	NA	NA	NA	NA	NA	T	T	T	W	T	T	T	T	T	T	T	T	T	W	T	W	T	T	W	W	T	T	T	T	W	T	W	W	N	W	T	T	T	T	T	W	T	T	T
S16_927864	T/C	16	927864	+	NA	NA	NA	NA	NA	NA	T	T	T	Y	T	T	T	T	T	T	T	T	Y	Y	N	Y	T	T	Y	Y	Y	T	T	T	Y	T	Y	Y	Y	Y	T	T	T	T	T	Y	T	T	T
S16_927974	A/G	16	927974	+	NA	NA	NA	NA	NA	NA	A	A	A	A	G	A	A	A	A	A	R	A	A	A	A	A	A	A	A	A	A	A	A	A	A	A	A	A	A	A	A	R	A	A	R	A	A	A	A
S17_58203	A/G	17	58203	+	NA	NA	NA	NA	NA	NA	A	A	A	A	G	A	A	G	A	A	A	A	A	A	N	A	A	A	A	A	A	A	A	A	A	A	A	A	A	A	A	A	A	A	A	A	A	A	A
S18_50645	A/C	18	50645	+	NA	NA	NA	NA	NA	NA	A	M	A	A	A	A	A	C	A	N	A	A	A	M	N	A	A	N	A	A	N	M	M	M	N	A	A	A	N	A	A	N	C	M	A	A	A	C	A
S18_94828	G/A	18	94828	+	NA	NA	NA	NA	NA	NA	G	R	G	R	N	N	N	R	G	G	G	G	G	R	N	G	G	N	A	G	R	R	R	G	R	G	A	G	R	R	G	N	R	R	A	G	A	R	G
S18_125616	G/A	18	125616	+	NA	NA	NA	NA	NA	NA	R	R	R	R	G	R	R	R	R	R	R	R	R	R	R	R	R	R	R	R	R	R	R	R	R	R	R	R	R	R	R	R	R	R	R	R	R	R	R
S18_125731	C/T	18	125731	+	NA	NA	NA	NA	NA	NA	C	Y	C	Y	C	C	C	Y	C	Y	C	C	C	Y	Y	C	C	Y	Y	C	Y	Y	Y	Y	Y	C	Y	C	Y	Y	C	C	Y	Y	Y	C	Y	Y	C
S18_240749	T/A	18	240749	+	NA	NA	NA	NA	NA	NA	T	T	T	T	T	T	T	T	T	W	T	T	T	W	T	T	T	W	W	T	W	W	W	T	T	T	T	T	T	T	T	T	W	T	T	T	W	T	T
S18_259600	T/C	18	259600	+	NA	NA	NA	NA	NA	NA	T	Y	T	Y	T	T	T	Y	T	Y	T	T	T	Y	Y	T	T	Y	Y	T	Y	Y	Y	Y	Y	T	Y	T	Y	Y	T	T	Y	Y	Y	T	Y	Y	T
S18_260166	T/G	18	260166	+	NA	NA	NA	NA	NA	NA	T	K	T	K	T	T	T	K	T	K	T	T	T	K	K	T	T	K	G	T	K	K	K	K	K	T	K	T	K	K	T	T	K	K	K	T	K	K	T
S18_284195	T/A	18	284195	+	NA	NA	NA	NA	NA	NA	T	W	T	W	T	T	T	W	T	W	T	T	T	W	W	T	T	T	W	T	W	W	W	W	W	T	W	T	W	W	T	T	W	W	W	T	W	T	T
S18_294589	T/A	18	294589	+	NA	NA	NA	NA	NA	NA	T	W	T	W	N	T	T	W	T	W	T	T	T	W	N	T	T	N	A	T	W	W	W	W	W	T	A	N	A	W	T	N	A	T	W	T	W	T	T
S18_309274	T/A	18	309274	+	NA	NA	NA	NA	NA	NA	T	W	T	W	T	T	T	W	T	W	T	T	T	W	W	T	T	W	W	T	W	W	W	W	W	T	W	T	W	W	T	T	W	W	W	T	W	W	T
S18_385436	T/A	18	385436	+	NA	NA	NA	NA	NA	NA	T	W	T	W	T	T	T	W	T	W	T	T	T	W	N	T	T	T	W	T	N	W	W	T	W	T	W	T	T	W	T	T	A	T	W	T	W	W	T
S18_386009	A/G	18	386009	+	NA	NA	NA	NA	NA	NA	N	A	A	A	A	A	A	R	A	N	A	A	A	A	R	A	A	R	A	A	R	A	A	A	A	A	R	A	A	A	A	A	A	A	A	A	N	A	A
S18_386718	G/A	18	386718	+	NA	NA	NA	NA	NA	NA	G	R	G	R	G	G	G	R	G	R	G	G	G	R	R	G	G	R	R	G	R	R	R	R	R	G	R	G	R	R	G	G	R	R	R	G	R	R	G
S18_387335	A/C	18	387335	+	NA	NA	NA	NA	NA	NA	A	M	A	M	A	N	A	M	A	C	A	A	A	M	N	A	A	M	A	A	M	M	M	A	M	A	A	A	A	C	A	A	M	A	M	A	M	C	A
S18_391747	A/G	18	391747	+	NA	NA	NA	NA	NA	NA	N	R	A	R	N	A	A	R	A	G	A	A	A	N	G	A	A	R	G	A	R	R	R	R	G	N	G	A	N	G	A	A	G	G	R	A	G	A	A
S18_428370	G/T	18	428370	+	NA	NA	NA	NA	NA	NA	G	K	G	K	G	G	G	K	G	K	G	G	G	K	N	G	G	G	N	G	G	K	K	K	K	G	K	G	N	K	G	G	K	T	K	G	K	K	G
S18_492026	G/A	18	492026	+	NA	NA	NA	NA	NA	NA	G	R	G	R	N	N	G	G	G	A	G	G	G	G	N	G	G	G	N	G	R	R	R	R	R	G	N	G	A	N	G	G	A	G	R	G	R	A	G
S18_515682	A/G	18	515682	+	NA	NA	NA	NA	NA	NA	A	R	A	R	N	N	A	A	A	G	A	A	A	R	N	A	A	R	G	A	G	R	R	R	R	A	R	A	G	N	A	A	R	G	R	A	R	R	A
S18_531215	C/G	18	531215	+	NA	NA	NA	NA	NA	NA	C	S	C	S	C	C	C	S	C	S	C	C	C	S	G	C	C	S	S	C	S	S	S	S	S	C	S	C	G	G	C	C	S	G	S	C	S	S	C
S18_546238	C/A	18	546238	+	NA	NA	NA	NA	NA	NA	C	C	M	C	N	N	C	C	C	C	C	C	C	C	C	C	C	C	C	C	C	C	C	C	C	C	M	C	C	C	C	C	C	C	C	C	C	C	C
S18_645249	G/T	18	645249	+	NA	NA	NA	NA	NA	NA	G	G	G	K	G	N	G	G	G	G	G	G	G	G	N	G	G	G	G	G	G	K	K	G	K	G	K	G	K	K	G	G	N	K	K	G	N	K	G
S18_661880	A/T	18	661880	+	NA	NA	NA	NA	NA	NA	A	W	A	W	A	A	A	W	A	W	A	A	A	W	W	A	A	W	W	A	W	W	W	W	W	A	W	A	W	W	A	A	W	W	W	A	W	W	A
S18_667567	G/A	18	667567	+	NA	NA	NA	NA	NA	NA	G	R	G	R	G	G	G	R	G	R	G	G	G	R	N	G	G	A	R	G	R	R	R	R	R	G	R	G	G	R	G	G	R	G	R	G	R	G	G
S18_778749	A/G	18	778749	+	NA	NA	NA	NA	NA	NA	A	R	A	R	A	A	A	R	A	G	A	A	A	R	R	A	A	R	R	A	R	R	R	R	R	A	R	A	A	G	A	A	R	R	R	A	R	R	A
S18_778849	C/T	18	778849	+	NA	NA	NA	NA	NA	NA	C	Y	C	Y	N	C	C	Y	C	Y	C	C	C	Y	Y	C	C	Y	Y	C	Y	Y	Y	Y	Y	C	Y	C	Y	T	C	C	Y	C	Y	C	Y	Y	C
S18_779092	G/A	18	779092	+	NA	NA	NA	NA	NA	NA	G	R	G	R	G	G	G	R	G	G	G	G	G	R	N	N	G	R	N	G	A	R	R	R	R	G	G	G	N	R	N	G	N	A	G	G	G	R	G
S18_779243	G/A	18	779243	+	NA	NA	NA	NA	NA	NA	G	G	G	R	G	G	G	G	G	G	G	G	G	G	N	G	G	G	R	G	G	R	R	R	R	G	R	G	G	G	G	G	G	R	G	G	G	R	G
S18_795145	G/A	18	795145	+	NA	NA	NA	NA	NA	NA	G	R	G	R	G	G	G	R	G	R	G	N	G	G	N	G	G	A	R	G	G	R	R	R	R	G	R	G	R	R	G	G	R	N	R	G	R	A	G
S18_834484	A/G	18	834484	+	NA	NA	NA	NA	NA	NA	A	R	A	R	A	A	A	R	A	R	A	A	A	R	R	A	A	R	R	A	R	R	R	R	R	A	R	A	R	R	A	A	R	R	R	A	R	R	A
S18_905173	A/G	18	905173	+	NA	NA	NA	NA	NA	NA	A	R	A	R	N	A	A	R	A	R	A	A	A	A	N	A	A	G	R	A	R	R	R	R	R	A	A	A	N	N	A	N	A	G	R	A	R	N	A
S18_906974	G/A	18	906974	+	NA	NA	NA	NA	NA	NA	G	R	G	R	G	G	G	R	G	R	G	G	G	R	N	G	G	R	R	G	R	R	R	R	R	G	G	G	A	R	G	G	R	R	R	G	R	R	G
S18_942472	T/C	18	942472	+	NA	NA	NA	NA	NA	NA	T	Y	T	Y	T	T	T	Y	T	Y	T	N	T	Y	T	T	T	Y	C	T	Y	Y	Y	Y	Y	T	C	T	C	Y	T	T	Y	Y	Y	T	Y	Y	T
S18_944503	C/T	18	944503	+	NA	NA	NA	NA	NA	NA	C	C	C	C	C	C	C	C	C	C	C	C	C	C	C	C	C	Y	C	C	C	C	C	C	C	C	C	C	C	C	C	C	C	C	C	C	C	C	C
S18_948315	C/T	18	948315	+	NA	NA	NA	NA	NA	NA	C	Y	C	Y	C	C	C	Y	C	T	C	C	C	Y	T	C	C	T	N	C	C	Y	Y	Y	C	C	Y	C	Y	C	C	C	Y	T	Y	C	Y	C	C
S18_952763	C/A	18	952763	+	NA	NA	NA	NA	NA	NA	C	M	C	M	C	C	C	M	C	M	C	C	C	M	M	C	C	C	M	C	M	M	M	M	M	C	A	C	M	M	C	C	M	C	M	C	M	M	C
S18_970785	T/A	18	970785	+	NA	NA	NA	NA	NA	NA	T	W	T	T	N	N	T	W	T	W	T	T	T	W	T	N	T	W	W	T	W	W	W	W	W	T	W	T	T	A	T	T	W	A	W	T	W	N	T
S18_971509	T/C	18	971509	+	NA	NA	NA	NA	NA	NA	T	Y	T	Y	T	T	T	Y	T	Y	T	T	T	Y	Y	T	T	Y	Y	T	Y	Y	Y	Y	Y	T	Y	T	Y	Y	T	T	Y	Y	Y	T	Y	Y	T
S18_980782	A/G	18	980782	+	NA	NA	NA	NA	NA	NA	A	R	A	R	A	A	A	R	A	R	A	A	A	R	G	A	A	R	R	A	R	R	R	R	R	A	A	A	N	G	A	A	G	R	R	A	R	A	A
S18_980920	A/C	18	980920	+	NA	NA	NA	NA	NA	NA	A	C	A	M	N	N	A	M	A	C	A	A	A	M	A	A	A	M	M	A	N	M	M	M	M	A	A	A	N	N	A	A	M	A	C	A	M	A	A
S18_981843	A/G	18	981843	+	NA	NA	NA	NA	NA	NA	A	R	A	R	A	A	A	R	A	R	A	A	A	R	G	A	A	R	R	A	R	R	R	R	R	A	R	A	R	R	A	A	R	R	R	A	R	R	A
S18_997010	G/A	18	997010	+	NA	NA	NA	NA	NA	NA	G	R	G	R	G	G	G	R	G	R	G	G	G	R	A	G	G	R	R	G	R	R	R	R	R	G	R	G	G	A	G	G	R	R	A	G	R	R	G
S18_997163	A/T	18	997163	+	NA	NA	NA	NA	NA	NA	A	A	W	A	A	A	A	A	A	A	A	A	A	A	A	A	A	A	A	A	A	A	A	A	A	A	A	A	A	A	A	A	A	A	A	A	A	A	A
S18_998277	A/G	18	998277	+	NA	NA	NA	NA	NA	NA	A	R	A	R	A	A	A	R	A	R	A	A	A	R	G	A	A	R	R	A	R	R	R	R	R	A	R	A	R	R	A	A	R	R	R	A	R	R	A
S18_1023096	C/T	18	1023096	+	NA	NA	NA	NA	NA	NA	C	Y	C	Y	N	C	C	Y	C	Y	C	C	C	T	T	C	C	Y	Y	C	T	T	Y	Y	Y	C	Y	C	Y	T	C	C	T	T	Y	C	Y	T	C
S18_1034820	T/A	18	1034820	+	NA	NA	NA	NA	NA	NA	T	W	T	W	T	T	T	W	T	W	T	T	T	W	W	T	T	W	W	T	W	W	W	W	W	T	W	T	W	W	T	T	W	W	W	T	W	W	T
S18_1052100	T	18	1052100	+	NA	NA	NA	NA	NA	NA	T	T	T	T	T	T	T	T	T	T	T	T	T	T	T	T	T	T	T	T	T	T	T	T	T	T	T	T	T	T	T	T	T	T	T	T	T	T	T
S18_1067359	C/T	18	1067359	+	NA	NA	NA	NA	NA	NA	C	Y	C	Y	C	N	C	C	C	Y	C	C	C	T	T	C	C	T	T	C	C	Y	Y	C	T	C	Y	C	N	C	C	C	Y	N	T	C	Y	Y	C
S18_1086199	C/T	18	1086199	+	NA	NA	NA	NA	NA	NA	C	Y	C	Y	C	C	C	Y	C	Y	C	C	C	Y	Y	C	C	Y	Y	C	C	Y	Y	Y	Y	C	Y	C	Y	C	C	C	Y	Y	Y	C	Y	Y	C
S18_1102770	A/C	18	1102770	+	NA	NA	NA	NA	NA	NA	A	M	M	M	A	A	A	M	A	M	A	A	A	M	M	A	A	M	M	A	M	M	M	M	M	A	M	A	M	M	A	A	M	M	M	A	M	M	A
S18_1111403	G/A	18	1111403	+	NA	NA	NA	NA	NA	NA	G	R	G	R	N	G	G	R	G	R	G	G	G	R	R	G	G	R	R	G	R	A	R	R	R	G	R	G	R	G	G	G	R	A	R	G	R	R	G
S18_1111796	A/G	18	1111796	+	NA	NA	NA	NA	NA	NA	A	R	A	R	A	A	A	G	A	R	A	A	A	A	N	A	A	G	R	A	A	R	R	G	R	A	R	A	G	G	A	A	A	A	R	A	R	R	A
S18_1123181	C/T	18	1123181	+	NA	NA	NA	NA	NA	NA	C	Y	C	Y	C	C	C	Y	C	Y	C	C	C	Y	C	C	C	Y	Y	C	C	Y	Y	Y	Y	C	Y	C	C	Y	C	C	Y	C	Y	C	Y	Y	C
S18_1141544	G/A	18	1141544	+	NA	NA	NA	NA	NA	NA	G	R	G	R	G	G	G	R	G	R	G	G	G	R	N	G	G	R	R	G	R	R	R	R	R	G	R	G	R	R	G	G	R	R	R	G	R	R	G
S18_1143490	G/T	18	1143490	+	NA	NA	NA	NA	NA	NA	G	K	N	K	G	N	G	K	N	N	G	G	G	K	N	N	G	G	T	G	K	K	K	K	K	G	K	G	T	T	G	G	K	K	T	G	T	K	G
S18_1147450	A/C	18	1147450	+	NA	NA	NA	NA	NA	NA	A	M	A	M	A	A	A	M	A	M	A	A	A	M	A	A	A	M	M	A	M	M	M	M	M	A	M	A	M	M	A	A	C	M	M	A	M	M	A
S18_1160938	G/A	18	1160938	+	NA	NA	NA	NA	NA	NA	G	R	G	R	N	G	G	R	G	R	G	G	G	R	G	G	G	A	R	G	R	R	R	R	R	G	R	G	R	A	G	G	G	A	R	G	R	R	G
S18_1189254	A/C	18	1189254	+	NA	NA	NA	NA	NA	NA	A	M	A	M	A	N	A	M	A	M	A	A	A	M	A	A	A	M	M	A	C	M	M	M	M	A	M	A	C	M	A	A	M	M	M	A	M	M	A
S18_1238794	C/G	18	1238794	+	NA	NA	NA	NA	NA	NA	C	S	C	S	N	N	C	S	C	S	C	C	C	S	N	C	C	C	S	C	C	S	S	S	S	C	S	C	S	S	C	C	S	S	S	C	S	S	C
S18_1252351	A/G	18	1252351	+	NA	NA	NA	NA	NA	NA	A	R	A	R	A	A	A	R	A	R	A	A	A	R	A	A	A	A	R	A	A	R	R	R	R	A	R	A	R	R	A	A	R	R	R	A	R	R	A
S18_1259771	T/G	18	1259771	+	NA	NA	NA	NA	NA	NA	T	K	T	K	T	T	T	K	T	G	T	T	T	G	N	T	T	G	K	T	K	K	K	K	K	T	K	T	G	K	T	T	T	K	K	T	K	K	T
S18_1370205	A/G	18	1370205	+	NA	NA	NA	NA	NA	NA	A	A	A	A	A	A	A	A	A	A	A	A	A	A	R	A	A	R	A	A	R	A	A	A	A	A	A	A	A	A	A	A	A	A	A	A	A	A	A
S18_1394431	G/A	18	1394431	+	NA	NA	NA	NA	NA	NA	G	R	G	R	G	G	G	R	G	R	G	G	G	R	R	G	G	R	R	G	R	R	R	R	R	G	R	G	R	R	G	G	R	R	R	G	R	R	G
S18_1402963	A/C	18	1402963	+	NA	NA	NA	NA	NA	NA	A	M	A	M	A	A	A	M	A	M	A	A	A	M	M	A	A	M	M	A	M	M	M	M	M	A	M	A	M	C	A	A	M	M	C	A	M	M	A
S18_1403107	A/T	18	1403107	+	NA	NA	NA	NA	NA	NA	A	W	A	W	A	A	A	W	A	W	A	A	A	W	W	A	A	W	W	A	W	W	W	W	W	A	W	A	A	A	A	A	W	W	W	A	W	W	A
S18_1445538	G/A	18	1445538	+	NA	NA	NA	NA	NA	NA	G	R	G	R	G	G	G	R	G	R	G	G	G	R	R	G	G	R	R	G	R	R	R	R	R	G	R	G	R	R	G	G	R	R	R	G	R	R	G
S18_1447218	A/C	18	1447218	+	NA	NA	NA	NA	NA	NA	A	M	A	M	A	M	A	M	A	A	A	A	A	M	N	N	A	M	M	A	C	M	M	M	M	A	M	A	A	M	N	A	M	C	M	A	M	A	A
S18_1448700	A/T	18	1448700	+	NA	NA	NA	NA	NA	NA	A	W	A	W	A	A	A	W	A	W	A	A	A	W	A	A	A	T	W	A	W	W	W	W	W	A	W	A	W	W	A	A	W	W	W	A	W	W	A
S18_1455073	G/T	18	1455073	+	NA	NA	NA	NA	NA	NA	G	K	G	K	G	N	G	K	G	K	G	G	G	K	N	G	G	G	K	G	K	K	K	K	K	G	K	G	K	T	G	G	K	K	K	G	K	K	G
S18_1483997	G/A	18	1483997	+	NA	NA	NA	NA	NA	NA	G	G	G	G	G	G	G	G	G	G	G	G	G	G	R	G	G	R	G	G	G	G	G	G	G	G	G	G	G	G	G	G	G	R	G	G	G	G	G
S18_1486631	C/T	18	1486631	+	NA	NA	NA	NA	NA	NA	C	Y	C	Y	N	N	C	Y	C	Y	C	C	C	Y	C	C	C	C	Y	C	T	Y	Y	Y	Y	C	Y	C	Y	N	C	C	Y	Y	Y	C	Y	T	C
S18_1487690	G/T	18	1487690	+	NA	NA	NA	NA	NA	NA	G	K	G	K	G	N	G	T	G	K	G	G	G	K	G	G	G	G	G	G	K	K	G	T	G	G	K	G	G	K	G	G	K	T	K	G	K	K	G
S18_1495883	C/T	18	1495883	+	NA	NA	NA	NA	NA	NA	C	Y	C	Y	C	N	C	C	C	C	C	C	C	Y	C	C	C	C	C	C	C	C	C	C	Y	C	Y	C	C	Y	C	C	C	Y	Y	C	C	Y	C
S18_1540034	T/A	18	1540034	+	NA	NA	NA	NA	NA	NA	T	W	T	W	T	T	T	W	T	W	T	T	T	A	W	T	T	W	W	T	W	W	W	W	W	T	W	T	N	W	T	T	W	W	W	T	W	T	T
S18_1540159	A/T	18	1540159	+	NA	NA	NA	NA	NA	NA	A	W	A	W	A	A	A	W	A	W	A	A	A	W	A	A	A	A	W	A	W	W	W	W	W	A	W	A	W	W	A	A	W	W	W	A	W	W	A
S18_1592628	C/T	18	1592628	+	NA	NA	NA	NA	NA	NA	C	Y	C	Y	C	C	C	Y	C	Y	C	C	C	Y	C	C	C	C	Y	C	Y	Y	Y	Y	Y	C	Y	C	Y	Y	C	C	Y	Y	Y	C	Y	Y	C
S18_1592751	C/T	18	1592751	+	NA	NA	NA	NA	NA	NA	C	Y	C	Y	C	C	C	Y	C	Y	C	C	C	Y	Y	C	C	Y	Y	C	Y	Y	Y	Y	Y	C	Y	C	Y	Y	C	C	Y	Y	Y	C	Y	Y	C
S18_1596430	G/C	18	1596430	+	NA	NA	NA	NA	NA	NA	G	S	N	S	G	G	G	S	G	G	G	G	G	S	N	G	G	S	G	G	S	S	S	S	S	N	S	G	N	G	G	G	S	S	G	G	G	S	G
S18_1644750	A/T	18	1644750	+	NA	NA	NA	NA	NA	NA	A	W	A	W	A	N	A	W	A	W	A	A	A	W	N	A	A	W	T	A	T	W	W	W	W	A	W	A	N	W	A	N	W	A	W	A	W	W	A
S18_1682507	T/C	18	1682507	+	NA	NA	NA	NA	NA	NA	T	Y	T	Y	T	T	T	Y	T	Y	T	T	T	Y	T	T	T	Y	C	T	Y	Y	Y	Y	T	T	Y	T	N	C	T	T	Y	T	Y	T	C	Y	T
S18_1720960	T/A	18	1720960	+	NA	NA	NA	NA	NA	NA	T	W	T	W	T	N	T	W	T	A	T	T	T	W	N	T	T	T	W	T	W	W	W	W	W	T	W	T	N	A	T	T	W	A	W	T	W	W	T
S18_1723858	G/A	18	1723858	+	NA	NA	NA	NA	NA	NA	G	R	G	R	N	G	G	N	G	G	G	G	G	A	G	G	G	R	G	G	G	R	R	R	R	G	R	G	A	N	G	G	R	R	R	G	R	R	G
S18_1794343	G/A	18	1794343	+	NA	NA	NA	NA	NA	NA	G	R	G	R	G	G	G	R	G	R	G	G	G	R	A	G	G	R	R	G	R	R	R	R	R	G	R	G	R	R	G	G	A	R	R	G	R	R	G
S18_1847708	A/G	18	1847708	+	NA	NA	NA	NA	NA	NA	A	R	A	R	A	A	A	R	A	R	A	A	A	R	N	A	A	A	R	A	R	R	R	R	R	A	R	A	R	R	A	A	R	R	R	A	R	R	A
S18_1880492	C/T	18	1880492	+	NA	NA	NA	NA	NA	NA	C	C	C	C	C	C	C	C	C	C	C	C	N	C	T	C	C	T	C	C	Y	C	C	Y	Y	C	C	C	N	C	C	C	C	C	C	C	C	C	C
S18_1884893	T/C	18	1884893	+	NA	NA	NA	NA	NA	NA	T	Y	T	Y	T	T	T	Y	T	T	T	N	T	Y	T	T	T	Y	T	T	Y	Y	Y	Y	Y	T	C	T	N	Y	T	T	Y	N	T	T	Y	Y	T
S18_1886513	A/G	18	1886513	+	NA	NA	NA	NA	NA	NA	A	R	A	R	A	A	A	R	A	R	A	A	A	R	R	A	A	R	R	A	R	R	R	R	R	A	R	A	R	R	A	A	R	R	R	A	R	R	A
S18_1887848	A/C	18	1887848	+	NA	NA	NA	NA	NA	NA	A	M	A	M	A	A	A	M	A	M	A	A	A	M	M	A	A	M	M	A	M	M	M	M	M	A	M	A	M	M	A	A	M	M	M	A	M	M	A
S18_1946336	G/A	18	1946336	+	NA	NA	NA	NA	NA	NA	G	G	G	R	G	G	G	R	G	R	G	G	G	R	R	G	G	G	R	G	G	R	R	R	R	G	G	G	R	R	G	G	G	R	R	G	R	R	G
S18_1951941	A/G	18	1951941	+	NA	NA	NA	NA	NA	NA	A	R	A	R	A	A	A	R	A	G	A	A	A	A	N	A	A	G	N	A	G	R	R	R	R	A	N	N	N	R	A	A	R	R	R	A	G	R	A
S18_1979643	T/C	18	1979643	+	NA	NA	NA	NA	NA	NA	T	Y	T	Y	T	N	T	Y	T	Y	T	T	T	Y	Y	T	T	Y	Y	T	Y	Y	Y	Y	Y	T	Y	T	Y	Y	T	N	Y	Y	Y	T	Y	Y	T
S18_1985405	G/A	18	1985405	+	NA	NA	NA	NA	NA	NA	G	R	G	R	N	G	G	R	G	R	G	G	G	R	A	G	G	R	R	G	R	R	R	R	R	G	R	G	R	R	G	G	G	R	R	G	R	R	G
S18_1990093	G/A	18	1990093	+	NA	NA	NA	NA	NA	NA	G	R	G	R	G	G	G	R	G	R	G	G	G	R	R	G	G	R	R	G	R	R	R	R	R	G	R	G	R	R	G	G	R	R	R	G	R	R	G
S18_2002075	A/G	18	2002075	+	NA	NA	NA	NA	NA	NA	N	A	A	A	A	N	A	A	A	A	A	A	A	A	N	A	A	R	A	A	R	A	A	A	A	A	A	A	A	A	A	A	N	A	A	A	A	A	A
S18_2023659	T/C	18	2023659	+	NA	NA	NA	NA	NA	NA	T	Y	T	Y	T	T	T	C	T	T	T	T	T	Y	Y	T	T	C	Y	T	Y	T	Y	Y	Y	T	Y	T	Y	Y	T	N	Y	Y	Y	T	Y	Y	T
S18_2051988	C/T	18	2051988	+	NA	NA	NA	NA	NA	NA	C	Y	C	Y	C	C	C	Y	C	Y	C	C	C	Y	T	C	C	Y	Y	C	Y	Y	Y	Y	Y	C	Y	C	Y	Y	C	C	Y	C	Y	C	Y	Y	C
S18_2061756	T/G	18	2061756	+	NA	NA	NA	NA	NA	NA	T	K	T	K	T	T	T	K	T	K	T	T	T	K	K	T	T	K	K	T	K	K	K	K	K	T	K	T	K	K	T	T	K	K	K	T	K	K	T
S18_2089052	C/T	18	2089052	+	NA	NA	NA	NA	NA	NA	C	C	C	Y	C	C	C	C	C	Y	C	C	C	Y	N	C	C	C	C	C	C	Y	Y	Y	C	C	C	C	C	Y	C	C	Y	Y	C	C	C	C	C
S18_2089502	G/C	18	2089502	+	NA	NA	NA	NA	NA	NA	G	S	G	S	G	G	G	S	G	S	G	G	G	S	S	G	G	S	S	G	S	S	S	S	S	G	S	G	S	S	G	G	S	S	S	G	S	S	G
S18_2102674	T/A	18	2102674	+	NA	NA	NA	NA	NA	NA	T	W	T	W	N	T	T	A	T	W	T	T	T	A	N	T	T	N	A	T	W	W	W	W	W	T	A	T	N	T	T	T	W	N	W	T	T	A	T
S18_2109409	C/T	18	2109409	+	NA	NA	NA	NA	NA	NA	C	Y	C	Y	C	C	C	Y	C	Y	C	C	C	Y	N	C	C	Y	Y	C	Y	Y	Y	Y	Y	C	Y	C	Y	T	C	C	Y	Y	Y	C	Y	Y	C
S18_2144075	G/C	18	2144075	+	NA	NA	NA	NA	NA	NA	G	S	G	S	G	G	G	C	G	C	G	G	G	S	N	G	G	G	S	G	C	S	C	C	S	G	C	G	S	S	G	N	C	S	C	G	C	S	G
S18_2189896	T/G	18	2189896	+	NA	NA	NA	NA	NA	NA	T	K	T	K	T	T	T	K	T	K	T	T	T	K	N	T	T	K	K	T	K	G	K	K	K	T	K	T	T	G	T	T	K	K	K	T	K	K	T
S18_2225562	G/C	18	2225562	+	NA	NA	NA	NA	NA	NA	G	S	G	S	G	G	G	S	G	S	G	G	G	S	S	G	G	S	S	G	S	S	S	S	S	G	S	G	S	S	G	G	S	S	S	G	S	S	G
S18_2225934	T/C	18	2225934	+	NA	NA	NA	NA	NA	NA	T	Y	T	Y	T	T	T	Y	T	Y	T	T	T	Y	T	T	T	Y	Y	T	Y	Y	Y	Y	Y	T	Y	T	Y	Y	T	T	Y	Y	Y	T	Y	Y	T
S18_2226492	A/G	18	2226492	+	NA	NA	NA	NA	NA	NA	A	R	A	R	A	A	A	R	A	R	A	A	A	R	A	A	A	R	R	A	R	R	R	R	R	A	R	A	R	R	A	A	R	R	R	A	R	R	A
S18_2226643	G/A	18	2226643	+	NA	NA	NA	NA	NA	NA	G	R	G	R	G	G	G	R	G	R	G	G	G	R	R	G	G	R	R	G	R	R	R	R	R	G	R	G	R	R	G	G	R	R	R	G	R	R	G
S18_2260228	G/C	18	2260228	+	NA	NA	NA	NA	NA	NA	N	S	N	S	N	N	G	S	G	S	G	G	G	N	G	G	G	C	S	G	N	S	S	S	S	G	S	G	S	N	G	G	S	S	S	G	S	C	G
S18_2260344	C/T	18	2260344	+	NA	NA	NA	NA	NA	NA	C	Y	C	Y	C	C	C	Y	C	Y	N	C	C	Y	C	C	C	N	T	C	Y	Y	Y	Y	Y	C	Y	C	N	C	C	C	Y	N	Y	C	C	Y	C
S18_2274123	C/G	18	2274123	+	NA	NA	NA	NA	NA	NA	C	S	C	S	C	C	C	S	C	S	C	C	C	S	N	C	C	G	S	C	S	S	S	S	S	C	G	C	G	S	C	C	S	S	S	C	S	S	C
S18_2287985	A/T	18	2287985	+	NA	NA	NA	NA	NA	NA	A	W	A	W	A	A	A	W	A	W	A	A	A	W	W	A	A	W	W	A	W	W	W	W	W	A	W	A	W	W	A	A	T	T	W	A	W	W	A
S18_2290702	C/T	18	2290702	+	NA	NA	NA	NA	NA	NA	C	Y	C	Y	C	C	C	Y	C	Y	C	C	C	Y	Y	C	C	Y	Y	C	Y	Y	Y	Y	Y	C	Y	C	Y	Y	C	C	Y	Y	Y	C	Y	Y	C
S18_2301349	C/A	18	2301349	+	NA	NA	NA	NA	NA	NA	C	M	C	M	C	C	C	M	C	A	C	C	C	A	C	C	C	C	M	C	C	M	M	M	A	C	M	C	N	A	C	C	M	A	M	C	M	M	C
S18_2301450	C/T	18	2301450	+	NA	NA	NA	NA	NA	NA	C	Y	C	Y	C	C	C	Y	C	C	C	C	C	Y	N	C	C	Y	Y	C	T	T	Y	Y	Y	C	Y	C	N	N	C	C	T	T	Y	C	Y	Y	C
S18_2304465	A/G	18	2304465	+	NA	NA	NA	NA	NA	NA	A	R	A	R	A	N	A	R	A	A	A	A	A	R	N	A	A	R	R	A	N	R	R	R	R	A	A	A	N	A	A	A	R	G	R	A	R	G	A
S18_2305669	A/T	18	2305669	+	NA	NA	NA	NA	NA	NA	A	W	A	W	A	A	A	W	A	W	A	A	A	W	A	A	A	W	W	A	W	W	W	W	W	A	W	A	W	T	A	A	W	W	W	A	W	W	A
S18_2316763	T/C	18	2316763	+	NA	NA	NA	NA	NA	NA	T	Y	T	Y	T	T	T	Y	T	Y	T	T	T	Y	T	T	T	Y	Y	T	Y	Y	Y	Y	Y	T	Y	T	T	Y	T	T	Y	Y	Y	T	Y	Y	T
S18_2322028	A/G	18	2322028	+	NA	NA	NA	NA	NA	NA	A	R	A	R	A	A	A	R	A	R	A	A	A	R	N	A	A	R	R	A	A	R	R	R	R	A	R	A	A	R	A	A	R	A	R	A	R	R	A
S18_2323227	G/C	18	2323227	+	NA	NA	NA	NA	NA	NA	G	S	G	S	G	G	G	S	G	S	G	G	G	S	G	G	G	S	S	G	S	S	S	S	S	G	S	G	S	S	G	G	S	S	S	G	S	S	G
S18_2374484	C/T	18	2374484	+	NA	NA	NA	NA	NA	NA	C	Y	C	Y	C	C	C	Y	C	T	C	C	N	Y	C	C	C	Y	Y	C	Y	N	Y	Y	Y	C	Y	C	T	Y	C	C	C	Y	Y	C	Y	C	C
S18_2374593	A/G	18	2374593	+	NA	NA	NA	NA	NA	NA	A	R	A	R	A	A	A	R	A	R	A	A	A	R	G	A	A	R	R	A	R	R	R	R	R	A	R	A	R	R	A	A	R	R	R	A	R	R	A
S18_2376936	G/C	18	2376936	+	NA	NA	NA	NA	NA	NA	G	S	G	S	N	G	G	S	G	S	G	G	G	G	S	G	G	C	C	G	S	S	S	S	S	G	S	G	G	N	G	G	S	S	S	G	S	S	G
S18_2386476	A/T	18	2386476	+	NA	NA	NA	NA	NA	NA	A	W	A	W	A	A	A	W	A	W	A	A	A	W	N	A	A	A	W	A	A	W	W	W	W	A	W	A	A	T	A	A	W	T	W	A	W	W	A
S18_2387152	G/A	18	2387152	+	NA	NA	NA	NA	NA	NA	G	R	G	R	G	G	G	G	G	R	G	G	G	R	A	G	G	R	R	G	R	R	R	R	R	G	R	G	R	R	G	G	R	N	R	G	R	N	G
S18_2406933	C/G	18	2406933	+	NA	NA	NA	NA	NA	NA	C	S	C	S	C	C	C	S	C	S	C	C	C	S	C	C	C	S	S	C	S	S	S	S	S	C	S	C	S	S	C	C	S	S	S	C	S	C	C
S18_2410697	C/T	18	2410697	+	NA	NA	NA	NA	NA	NA	C	C	C	Y	C	C	C	C	C	C	C	C	C	Y	C	C	C	Y	C	C	C	C	C	C	Y	C	C	C	Y	Y	C	C	C	Y	Y	C	C	Y	C
S18_2474108	T/C	18	2474108	+	NA	NA	NA	NA	NA	NA	T	Y	T	Y	T	T	T	Y	T	Y	T	T	T	Y	T	T	T	T	Y	T	T	Y	Y	Y	Y	T	Y	T	Y	Y	T	T	C	Y	Y	T	Y	Y	T
S18_2483611	A/G	18	2483611	+	NA	NA	NA	NA	NA	NA	A	G	A	R	A	A	A	R	A	R	A	A	N	R	N	A	A	A	G	A	R	R	R	R	R	A	A	A	A	A	A	A	A	G	R	A	A	R	A
S18_2486987	G/T	18	2486987	+	NA	NA	NA	NA	NA	NA	G	K	G	K	G	G	G	K	G	K	G	G	G	K	K	G	G	K	K	G	K	K	K	K	K	G	K	G	K	K	G	G	K	K	K	G	K	K	G
S18_2526520	G/A	18	2526520	+	NA	NA	NA	NA	NA	NA	G	R	G	R	G	G	G	R	G	R	G	G	G	R	R	G	G	R	R	G	R	R	R	R	R	G	R	G	R	R	G	G	R	R	R	G	R	R	G
S18_2533603	T/C	18	2533603	+	NA	NA	NA	NA	NA	NA	T	Y	N	Y	N	N	T	Y	T	Y	T	T	T	C	T	N	T	T	Y	T	Y	Y	Y	Y	C	T	Y	T	Y	C	T	T	Y	C	C	T	Y	Y	T
S18_2544711	A/G	18	2544711	+	NA	NA	NA	NA	NA	NA	A	R	A	R	A	A	A	R	A	R	A	A	A	R	R	A	A	R	R	A	R	R	R	R	R	A	R	A	R	R	A	A	R	R	R	A	R	R	A
S18_2596298	C/G	18	2596298	+	NA	NA	NA	NA	NA	NA	C	S	C	S	C	C	C	C	C	C	C	C	C	S	C	C	C	S	S	C	G	S	S	S	S	C	S	C	C	S	C	C	S	S	S	C	S	S	C
S18_2622473	G/A	18	2622473	+	NA	NA	NA	NA	NA	NA	G	G	G	G	G	G	G	G	G	G	G	G	G	G	A	G	G	R	G	G	R	G	G	G	G	G	G	G	G	G	G	G	G	G	G	G	G	G	G
S18_2651538	C/T	18	2651538	+	NA	NA	NA	NA	NA	NA	C	Y	C	Y	C	C	C	Y	C	Y	C	C	C	C	Y	C	C	Y	Y	C	Y	Y	Y	Y	Y	C	Y	C	N	Y	C	C	C	C	Y	C	Y	Y	C
S18_2662472	A/G	18	2662472	+	NA	NA	NA	NA	NA	NA	A	R	A	R	A	A	A	R	A	R	A	A	A	R	R	A	A	R	R	A	R	R	R	R	R	A	R	A	R	R	A	A	R	R	R	A	R	R	A
S18_2684014	G/A	18	2684014	+	NA	NA	NA	NA	NA	NA	G	R	G	R	G	G	G	R	G	R	G	G	G	R	G	G	G	G	R	G	R	R	R	R	R	G	R	G	R	G	G	G	R	G	R	G	R	R	G
S18_2725453	T/G	18	2725453	+	NA	NA	NA	NA	NA	NA	N	K	T	G	T	T	T	K	T	K	T	T	T	K	T	T	T	G	K	T	K	K	K	K	K	T	K	T	N	G	T	T	K	K	K	T	K	K	T
S18_2735074	T/C	18	2735074	+	NA	NA	NA	NA	NA	NA	T	Y	T	Y	T	T	T	Y	T	Y	T	T	T	Y	C	T	T	Y	Y	T	Y	Y	Y	Y	Y	T	Y	T	Y	Y	T	T	Y	Y	Y	T	Y	Y	T
S18_2735190	G/T	18	2735190	+	NA	NA	NA	NA	NA	NA	G	K	G	K	G	G	G	K	G	K	G	G	G	K	K	G	G	K	K	G	K	K	K	K	K	G	K	G	K	K	G	G	K	K	K	G	K	K	G
S18_2759645	A/G	18	2759645	+	NA	NA	NA	NA	NA	NA	A	R	A	R	A	A	A	R	A	R	A	A	A	A	N	A	A	A	R	A	R	R	R	N	R	A	R	A	R	N	A	A	A	R	R	A	R	G	A
S18_2866064	A/C	18	2866064	+	NA	NA	NA	NA	NA	NA	A	M	A	M	A	A	A	M	A	M	A	A	A	M	A	A	A	M	M	A	M	M	M	M	M	A	M	A	M	M	A	A	C	M	M	A	M	M	A
S18_2894177	T/C	18	2894177	+	NA	NA	NA	NA	NA	NA	T	Y	T	Y	T	T	T	Y	T	T	T	T	T	Y	T	N	T	T	N	T	T	Y	Y	T	T	T	C	T	Y	C	T	N	Y	Y	Y	T	T	Y	T
S18_2897011	C/T	18	2897011	+	NA	NA	NA	NA	NA	NA	C	T	C	Y	N	C	C	Y	N	Y	C	C	C	T	T	C	C	Y	Y	C	C	Y	Y	Y	Y	C	T	N	T	Y	C	C	Y	Y	Y	C	Y	T	C
S18_2923252	C/A	18	2923252	+	NA	NA	NA	NA	NA	NA	C	M	C	M	C	N	C	M	C	M	C	C	C	M	C	C	C	M	A	C	N	M	M	M	A	C	M	C	M	M	C	C	M	C	M	C	A	N	C
S18_2923362	A/G	18	2923362	+	NA	NA	NA	NA	NA	NA	A	R	A	R	N	A	A	R	A	R	A	A	A	A	A	A	A	A	R	A	A	R	R	R	R	A	R	A	R	A	A	A	G	R	R	A	R	R	A
S18_2973957	T/A	18	2973957	+	NA	NA	NA	NA	NA	NA	T	W	T	W	T	T	T	W	T	W	T	T	T	W	W	T	T	W	W	T	W	W	W	W	W	T	W	T	W	W	T	T	W	W	W	T	W	W	T
S18_2978556	C/T	18	2978556	+	NA	NA	NA	NA	NA	NA	C	Y	C	Y	C	C	C	Y	C	C	C	C	C	Y	C	C	C	Y	Y	C	Y	Y	C	Y	Y	C	Y	C	Y	Y	C	C	Y	Y	Y	C	Y	Y	C
S18_2978680	T/G	18	2978680	+	NA	NA	NA	NA	NA	NA	T	K	T	K	T	N	T	K	T	K	T	T	T	G	N	T	T	K	K	T	K	K	K	K	K	T	K	T	K	K	T	T	T	T	K	T	T	T	T
S18_2978818	C/A	18	2978818	+	NA	NA	NA	NA	NA	NA	C	M	C	M	N	N	C	M	C	C	C	C	C	M	N	C	C	M	A	C	M	M	M	M	M	C	M	C	C	C	C	C	M	N	A	C	M	M	C
S18_3051000	C/T	18	3051000	+	NA	NA	NA	NA	NA	NA	C	C	C	C	C	C	Y	C	Y	C	C	Y	Y	C	N	T	C	C	C	Y	C	C	C	C	C	C	C	Y	C	N	C	C	C	C	C	Y	C	C	C
S18_3063656	A/G	18	3063656	+	NA	NA	NA	NA	NA	NA	N	R	A	R	N	A	A	R	A	G	A	A	A	N	N	A	N	N	G	A	A	R	R	R	A	A	G	A	N	R	A	A	R	R	A	A	R	R	A
S18_3133983	G/A	18	3133983	+	NA	NA	NA	NA	NA	NA	G	R	G	R	G	G	G	A	G	R	G	G	G	R	A	G	G	R	R	G	R	R	R	R	R	G	G	G	R	R	G	G	R	R	R	G	R	R	G
S18_3197488	C/G	18	3197488	+	NA	NA	NA	NA	NA	NA	C	S	C	S	C	C	C	S	C	S	C	C	C	S	C	C	C	C	C	C	S	S	S	S	S	C	S	C	C	C	C	C	S	C	C	C	S	S	C
S18_3214766	G/A	18	3214766	+	NA	NA	NA	NA	NA	NA	G	G	G	R	G	G	G	G	G	R	G	G	G	A	N	G	G	G	G	G	G	R	R	R	R	G	G	G	G	G	G	G	G	R	G	G	R	R	G
S18_3236010	G/A	18	3236010	+	NA	NA	NA	NA	NA	NA	G	R	G	R	G	G	G	R	G	R	G	G	G	R	A	N	G	G	G	G	R	R	R	R	R	G	R	G	R	G	G	G	R	R	G	G	R	R	G
S18_3237038	T/A	18	3237038	+	NA	NA	NA	NA	NA	NA	T	W	T	W	T	N	T	W	T	W	T	T	T	W	N	T	T	W	T	T	W	W	W	A	W	T	W	T	T	W	T	T	W	N	T	T	W	T	T
S18_3238202	C/T	18	3238202	+	NA	NA	NA	NA	NA	NA	C	Y	C	Y	C	C	C	Y	C	Y	C	C	C	Y	T	C	C	Y	C	C	Y	Y	Y	Y	Y	C	T	C	T	Y	C	C	Y	Y	C	C	Y	T	C
S18_3266650	T/C	18	3266650	+	NA	NA	NA	NA	NA	NA	T	Y	T	Y	T	T	T	Y	T	Y	T	T	T	Y	T	T	T	T	T	T	Y	Y	Y	Y	Y	T	Y	T	T	C	T	T	Y	Y	T	T	Y	Y	T
S18_3266775	A/G	18	3266775	+	NA	NA	NA	NA	NA	NA	A	R	A	R	A	N	A	R	A	R	A	A	A	R	N	N	R	R	A	A	R	R	R	R	R	A	A	A	A	R	A	A	R	R	A	A	R	R	A
S18_3266894	A/G	18	3266894	+	NA	NA	NA	NA	NA	NA	A	R	A	R	N	A	A	R	A	R	A	A	A	R	N	N	A	A	A	A	A	R	R	R	R	A	R	A	N	R	A	A	R	N	A	A	R	G	A
S18_3267715	G/C	18	3267715	+	NA	NA	NA	NA	NA	NA	G	S	G	S	G	N	G	S	G	S	G	G	G	S	G	G	G	S	G	G	S	S	S	S	S	G	S	G	S	S	G	G	S	S	G	G	S	S	G
S18_3322493	G/A	18	3322493	+	NA	NA	NA	NA	NA	NA	G	R	G	R	G	G	G	R	G	R	G	G	G	R	A	G	G	G	G	G	R	R	R	R	R	G	R	G	R	R	G	G	R	A	G	G	R	R	G
S18_3328929	A/C	18	3328929	+	NA	NA	NA	NA	NA	NA	A	M	A	M	A	A	A	M	A	M	A	A	A	M	N	A	A	M	A	A	M	M	M	M	M	A	M	A	M	M	A	A	M	M	A	A	M	M	A
S18_3356538	T/C	18	3356538	+	NA	NA	NA	NA	NA	NA	T	Y	T	Y	T	T	T	Y	T	Y	T	T	T	Y	N	T	T	T	T	T	T	Y	Y	Y	Y	T	Y	T	Y	Y	T	T	Y	Y	T	T	Y	Y	T
S18_3357561	A/C	18	3357561	+	NA	NA	NA	NA	NA	NA	A	M	A	M	A	A	A	M	A	M	A	A	A	M	M	A	A	M	A	A	M	M	M	M	M	A	M	A	M	M	A	A	M	M	A	A	M	M	A
S18_3367334	G/A	18	3367334	+	NA	NA	NA	NA	NA	NA	G	R	G	R	G	G	G	R	G	R	G	G	G	R	R	G	G	R	G	G	R	R	R	R	R	G	R	G	R	R	G	G	R	R	G	G	R	R	G
S18_3374368	T/A	18	3374368	+	NA	NA	NA	NA	NA	NA	T	W	T	W	T	T	T	W	T	W	T	T	T	W	W	T	T	W	T	T	W	W	W	W	W	T	W	T	W	W	T	T	W	W	T	T	W	W	T
S18_3380194	C/T	18	3380194	+	NA	NA	NA	NA	NA	NA	C	Y	C	Y	C	C	C	Y	C	Y	C	C	C	Y	T	C	C	Y	C	C	Y	Y	Y	Y	Y	C	Y	C	C	Y	C	C	Y	Y	C	C	Y	Y	C
S18_3387151	G/A	18	3387151	+	NA	NA	NA	NA	NA	NA	G	R	G	R	G	G	G	R	G	A	G	G	G	N	N	G	G	A	G	G	R	R	R	R	R	G	A	G	N	G	G	G	R	G	G	G	R	G	G
S18_3387278	A/C	18	3387278	+	NA	NA	NA	NA	NA	NA	N	M	A	M	A	N	A	M	A	N	A	A	A	A	A	A	A	A	A	A	N	M	M	M	N	A	C	A	N	C	A	A	C	A	A	A	A	M	A
S18_3407625	T/A	18	3407625	+	NA	NA	NA	NA	NA	NA	T	W	T	W	T	T	T	W	T	W	T	T	T	W	W	T	T	W	T	T	W	W	W	W	W	T	W	T	W	W	T	T	W	W	T	T	W	W	T
S18_3408332	T/C	18	3408332	+	NA	NA	NA	NA	NA	NA	T	Y	T	Y	T	T	T	Y	T	Y	T	T	T	T	N	T	T	T	T	T	T	Y	Y	Y	Y	T	Y	T	N	Y	T	T	Y	Y	T	T	T	Y	T
S18_3408468	A/G	18	3408468	+	NA	NA	NA	NA	NA	NA	N	R	A	R	A	A	A	R	A	R	A	A	A	R	A	A	A	A	A	A	A	R	R	R	R	A	R	A	A	G	A	A	A	R	A	A	R	N	A
S18_3412279	T/G	18	3412279	+	NA	NA	NA	NA	NA	NA	T	K	T	K	T	T	T	K	T	K	T	T	T	K	K	T	T	K	T	T	K	K	K	K	K	T	K	T	K	K	T	T	K	K	T	T	K	K	T
S18_3412402	G/A	18	3412402	+	NA	NA	NA	NA	NA	NA	G	R	G	R	G	G	G	R	G	R	G	G	G	R	G	G	G	R	G	G	R	R	R	R	R	G	R	G	R	R	G	G	R	R	G	G	R	R	G
S18_3424786	G/A	18	3424786	+	NA	NA	NA	NA	NA	NA	G	G	G	R	G	G	G	G	G	G	G	G	G	G	G	G	G	G	G	G	G	R	G	G	G	G	R	G	R	G	G	G	G	G	G	G	G	R	G
S18_3454587	G/A	18	3454587	+	NA	NA	NA	NA	NA	NA	G	R	G	R	G	G	G	R	G	R	G	G	G	R	R	G	G	R	G	G	R	R	R	R	R	G	R	G	R	R	G	G	R	G	G	G	R	R	G
S18_3454778	G/A	18	3454778	+	NA	NA	NA	NA	NA	NA	G	G	G	R	G	G	G	G	G	G	G	G	G	R	G	G	G	R	G	G	R	R	G	G	R	G	G	G	G	G	G	G	G	R	G	G	G	R	G
S18_3479366	T/G	18	3479366	+	NA	NA	NA	NA	NA	NA	T	K	T	K	T	T	T	K	T	K	T	T	T	K	T	T	T	T	T	T	T	K	K	K	K	T	K	T	T	K	T	T	K	K	T	T	K	K	T
S18_3479828	C	18	3479828	+	NA	NA	NA	NA	NA	NA	C	C	C	C	C	C	C	C	C	C	C	C	C	C	C	C	C	C	C	C	C	C	C	C	C	C	C	C	C	C	C	C	C	C	C	C	C	C	C
S18_3511925	G/C	18	3511925	+	NA	NA	NA	NA	NA	NA	G	S	G	S	G	G	G	S	G	S	G	G	G	S	S	G	G	S	G	G	S	S	S	S	S	G	S	G	S	G	G	G	S	C	G	G	S	S	G
S18_3512865	T/C	18	3512865	+	NA	NA	NA	NA	NA	NA	N	Y	T	Y	T	T	T	Y	T	Y	T	T	T	Y	N	T	T	C	T	T	Y	Y	Y	Y	Y	T	Y	T	Y	Y	T	T	Y	Y	T	T	Y	Y	T
S18_3532213	C/T	18	3532213	+	NA	NA	NA	NA	NA	NA	C	Y	C	Y	C	C	C	Y	C	T	C	C	C	Y	C	C	C	Y	C	C	Y	Y	Y	Y	Y	C	Y	C	Y	Y	C	C	Y	Y	C	C	Y	Y	C
S18_3533530	C/A	18	3533530	+	NA	NA	NA	NA	NA	NA	C	M	C	M	C	N	C	C	C	C	C	C	C	M	M	C	C	M	C	C	M	M	M	M	M	C	M	C	A	M	C	C	C	A	C	C	M	M	C
S18_3547762	A/G	18	3547762	+	NA	NA	NA	NA	NA	NA	A	R	A	R	A	A	A	R	A	R	A	A	A	R	N	A	A	R	A	A	A	R	R	R	R	A	R	A	A	R	A	A	R	R	A	A	G	R	A
S18_3552197	C/G	18	3552197	+	NA	NA	NA	NA	NA	NA	C	S	C	S	C	C	C	C	C	C	C	C	C	S	G	C	C	G	C	C	C	S	S	S	S	C	S	C	C	S	C	C	S	S	C	C	S	S	C
S18_3640163	G/A	18	3640163	+	NA	NA	NA	NA	NA	NA	G	R	G	R	N	G	G	R	G	R	G	G	G	R	G	G	G	G	G	G	R	R	R	R	R	G	R	G	R	R	G	G	R	R	G	G	R	R	G
S18_3708253	G/T	18	3708253	+	NA	NA	NA	NA	NA	NA	G	G	G	K	G	G	G	G	G	G	G	G	G	K	G	G	G	G	G	G	G	K	K	G	G	G	G	G	K	G	G	G	K	G	G	G	G	G	G
S20_99460	T/A	20	99460	+	NA	NA	NA	NA	NA	NA	T	T	T	T	T	T	T	T	T	T	T	T	T	T	T	T	T	T	T	T	T	T	T	T	T	T	T	T	T	T	T	T	T	T	T	T	T	T	T
S20_280762	A/C	20	280762	+	NA	NA	NA	NA	NA	NA	A	A	A	A	M	A	M	A	M	M	M	A	A	M	M	A	M	A	M	A	M	A	M	M	A	M	M	M	A	A	A	M	M	M	M	M	M	M	A
S20_356097	T/C	20	356097	+	NA	NA	NA	NA	NA	NA	T	T	T	T	T	T	T	T	T	T	T	T	T	T	N	T	T	N	T	T	T	T	T	T	T	T	T	T	T	T	T	T	T	T	T	T	T	T	T
S20_376977	A/T	20	376977	+	NA	NA	NA	NA	NA	NA	A	A	A	A	A	A	W	A	A	W	A	A	A	W	T	A	W	A	W	A	A	A	W	A	A	A	A	A	A	A	A	A	A	W	A	W	W	A	A
S20_377145	A/T	20	377145	+	NA	NA	NA	NA	NA	NA	A	A	A	A	A	A	A	A	A	A	A	A	A	A	A	A	A	A	A	A	A	A	A	A	A	A	A	A	A	A	A	A	A	A	A	A	A	A	A
S20_402199	C/T	20	402199	+	NA	NA	NA	NA	NA	NA	C	C	C	C	C	C	T	C	Y	C	Y	C	C	T	Y	C	Y	C	Y	C	C	C	Y	T	C	Y	N	Y	C	N	C	Y	Y	Y	Y	Y	Y	C	C
S20_454776	G/T	20	454776	+	NA	NA	NA	NA	NA	NA	G	G	G	G	G	G	G	G	G	G	G	G	G	G	G	G	G	G	G	G	G	G	G	G	G	G	G	G	G	G	G	G	G	G	G	G	G	G	G
S20_487948	T/C	20	487948	+	NA	NA	NA	NA	NA	NA	T	T	T	T	Y	T	Y	T	T	T	Y	T	T	T	T	T	T	Y	T	Y	Y	T	Y	T	T	T	Y	Y	T	T	T	T	T	T	Y	Y	Y	T	T
S20_558087	T/C	20	558087	+	NA	NA	NA	NA	NA	NA	T	T	T	T	Y	T	Y	T	Y	Y	Y	T	T	Y	Y	T	Y	T	Y	T	T	T	Y	Y	T	Y	Y	Y	T	T	T	Y	Y	Y	Y	Y	Y	Y	T
S20_606002	A/T	20	606002	+	NA	NA	NA	NA	NA	NA	A	A	A	A	W	A	W	A	W	W	W	A	A	W	W	A	W	A	W	A	A	A	W	W	A	W	W	W	A	A	A	W	W	W	W	W	W	W	A
S20_609059	G/A	20	609059	+	NA	NA	NA	NA	NA	NA	G	G	G	G	G	G	R	G	R	R	R	G	G	R	R	G	R	G	R	G	R	G	R	R	G	G	R	R	G	G	G	G	R	R	R	R	A	R	G
S20_717014	T/G	20	717014	+	NA	NA	NA	NA	NA	NA	T	T	T	T	N	T	K	T	K	G	K	T	T	K	G	T	K	T	K	T	T	T	K	K	T	K	K	K	T	T	T	G	T	K	K	K	K	K	T
S20_763009	G/T	20	763009	+	NA	NA	NA	NA	NA	NA	G	G	G	G	N	N	K	G	K	K	K	N	G	G	N	G	K	G	K	G	G	N	K	K	G	K	T	K	G	G	G	K	K	T	K	K	G	K	G
S20_763110	T/G	20	763110	+	NA	NA	NA	NA	NA	NA	T	T	T	T	T	T	K	T	K	G	K	T	T	K	N	T	K	N	K	T	T	T	K	G	T	K	K	G	N	T	T	G	K	T	K	K	K	K	T
S20_764157	A/C	20	764157	+	NA	NA	NA	NA	NA	NA	A	A	A	A	M	N	A	A	M	M	M	A	A	M	N	A	A	A	C	A	A	A	M	M	A	M	M	M	A	A	A	C	M	M	M	M	M	M	A
S20_764278	G/A	20	764278	+	NA	NA	NA	NA	NA	NA	G	G	R	G	G	G	G	G	G	G	G	G	G	G	G	G	G	G	G	G	G	G	G	G	G	G	G	G	G	G	G	G	G	G	G	G	G	G	G
S20_765501	C/T	20	765501	+	NA	NA	NA	NA	NA	NA	C	C	C	C	C	C	Y	C	Y	Y	Y	C	C	Y	C	C	Y	C	Y	C	C	C	Y	Y	C	Y	T	Y	C	C	C	Y	Y	Y	Y	Y	Y	Y	C
S20_765623	G/T	20	765623	+	NA	NA	NA	NA	NA	NA	G	G	K	G	G	G	G	G	G	G	G	G	G	G	G	G	G	G	G	G	G	G	G	G	G	G	G	G	G	G	G	G	G	G	G	G	G	G	G
S20_812809	T/C	20	812809	+	NA	NA	NA	NA	NA	NA	T	T	T	T	N	N	C	T	T	Y	Y	T	T	Y	N	T	Y	T	Y	T	Y	T	Y	Y	T	Y	Y	Y	T	T	T	Y	Y	Y	Y	Y	Y	C	T
S20_819916	T/C	20	819916	+	NA	NA	NA	NA	NA	NA	T	T	T	T	T	T	Y	T	Y	Y	T	T	T	Y	T	T	Y	T	Y	T	T	T	Y	T	T	T	C	Y	T	T	T	T	T	Y	T	Y	Y	T	T
S20_822725	T/C	20	822725	+	NA	NA	NA	NA	NA	NA	T	T	T	T	T	T	T	T	T	T	T	T	T	T	T	T	T	T	T	T	T	T	T	T	T	T	T	T	T	T	T	T	T	T	T	T	T	T	T
S20_827640	T/C	20	827640	+	NA	NA	NA	NA	NA	NA	T	T	T	T	T	T	Y	T	Y	T	Y	T	T	Y	N	T	Y	T	Y	T	T	T	Y	Y	T	C	C	T	T	T	T	Y	Y	T	Y	Y	Y	T	T
S20_856213	C	20	856213	+	NA	NA	NA	NA	NA	NA	C	C	C	C	C	C	C	C	C	C	C	C	C	C	C	C	C	C	C	C	C	C	C	C	C	C	C	C	C	C	C	C	C	C	C	C	C	C	C
S20_873867	A/G	20	873867	+	NA	NA	NA	NA	NA	NA	A	A	A	A	N	A	A	A	A	A	A	A	A	A	A	A	A	A	A	A	A	A	A	A	A	A	A	A	A	A	A	A	A	N	A	A	A	A	A
S20_946463	G/A	20	946463	+	NA	NA	NA	NA	NA	NA	G	G	G	G	G	G	G	G	G	R	G	G	G	R	G	G	R	G	R	G	G	G	R	G	G	G	G	G	G	G	G	G	R	G	G	G	R	G	G
S20_955720	C/A	20	955720	+	NA	NA	NA	NA	NA	NA	C	C	C	M	M	C	M	C	M	M	M	C	M	M	C	C	M	C	C	M	C	C	M	M	C	M	M	M	C	C	C	M	C	M	M	M	M	M	C
S20_964504	G/T	20	964504	+	NA	NA	NA	NA	NA	NA	G	G	G	G	G	G	K	G	K	K	G	G	G	K	N	G	K	G	K	G	G	G	K	G	G	G	K	K	G	G	G	G	K	K	G	K	K	G	G
S20_983169	A/C	20	983169	+	NA	NA	NA	NA	NA	NA	A	A	A	A	C	A	M	A	A	M	M	A	A	M	C	A	A	A	M	A	A	A	M	M	A	M	C	M	A	A	A	A	C	M	A	M	M	M	A
S20_1001446	C/T	20	1001446	+	NA	NA	NA	NA	NA	NA	C	C	C	C	Y	C	Y	C	Y	Y	Y	C	C	Y	Y	C	Y	C	Y	C	Y	C	Y	Y	C	Y	Y	Y	C	C	C	Y	Y	Y	Y	Y	Y	Y	C
S20_1024760	G/A	20	1024760	+	NA	NA	NA	NA	NA	NA	G	G	G	G	R	G	R	G	R	R	R	G	G	R	N	G	R	G	R	G	R	G	R	R	G	R	R	R	G	G	G	R	R	R	R	R	R	R	G
S20_1036758	T/C	20	1036758	+	NA	NA	NA	NA	NA	NA	T	T	T	T	C	T	Y	T	Y	Y	Y	T	T	N	T	N	C	T	Y	T	T	T	Y	Y	T	Y	Y	Y	T	T	T	Y	N	Y	Y	Y	T	C	T
S20_1036861	A/C	20	1036861	+	NA	NA	NA	NA	NA	NA	A	A	A	A	A	N	A	A	C	C	M	N	A	M	C	A	C	A	M	A	A	A	M	M	A	M	A	M	A	A	A	N	M	M	C	M	M	M	A
S20_1063479	C/A	20	1063479	+	NA	NA	NA	NA	NA	NA	C	C	C	C	C	C	M	C	M	M	C	C	C	M	C	C	M	C	M	C	M	C	M	C	C	C	M	M	C	C	C	C	M	M	C	M	M	C	C
S20_1063995	T/G	20	1063995	+	NA	NA	NA	NA	NA	NA	T	T	T	T	G	T	G	T	T	T	K	T	T	K	N	T	K	T	K	T	T	T	G	K	T	K	K	K	T	T	T	K	G	K	K	K	K	G	T
S20_1082657	T/C	20	1082657	+	NA	NA	NA	NA	NA	NA	T	T	T	T	Y	T	Y	T	Y	Y	Y	T	T	Y	Y	T	Y	T	Y	T	T	T	Y	Y	T	Y	Y	Y	T	T	T	Y	T	T	T	Y	Y	Y	T
S20_1099052	C/T	20	1099052	+	NA	NA	NA	NA	NA	NA	C	C	C	C	C	C	C	C	C	C	Y	C	C	C	C	C	C	C	C	C	C	C	C	Y	C	Y	C	C	C	C	C	Y	C	C	Y	C	C	Y	C
S20_1108985	A/G	20	1108985	+	NA	NA	NA	NA	NA	NA	A	A	A	A	A	A	R	A	R	R	R	A	A	R	A	A	R	A	R	A	A	A	R	R	A	R	R	R	A	A	A	R	R	R	R	R	R	R	A
S20_1110967	A/G	20	1110967	+	NA	NA	NA	NA	NA	NA	A	A	A	A	N	A	G	A	A	G	A	A	A	R	R	A	R	A	A	A	G	A	R	A	A	A	R	R	N	A	A	A	G	R	A	G	R	A	A
S20_1111089	G/A	20	1111089	+	NA	NA	NA	NA	NA	NA	G	G	G	G	N	G	R	G	R	R	G	G	G	R	A	G	R	G	R	G	R	G	R	G	G	G	R	R	G	G	G	G	R	R	G	R	R	G	G
S20_1128519	G/A	20	1128519	+	NA	NA	NA	NA	NA	NA	G	G	G	G	R	G	R	G	A	R	R	G	G	R	N	G	R	G	R	G	G	G	R	R	G	R	R	R	G	G	G	R	R	N	R	R	R	R	G
S20_1175012	A/G	20	1175012	+	NA	NA	NA	NA	NA	NA	A	A	A	A	N	A	R	A	R	R	A	A	A	R	G	A	R	A	R	A	A	A	R	A	A	A	R	R	A	A	A	A	R	G	A	R	R	A	A
S20_1176963	G/C	20	1176963	+	NA	NA	NA	NA	NA	NA	G	G	G	G	S	G	G	G	G	G	S	G	G	G	G	G	G	G	G	G	G	G	G	S	G	S	G	G	G	G	G	S	G	G	S	G	G	S	G
S20_1195250	C/T	20	1195250	+	NA	NA	NA	NA	NA	NA	C	C	C	C	Y	C	C	C	C	C	Y	C	C	C	C	C	C	C	C	C	C	C	C	Y	C	Y	C	C	C	C	C	Y	C	C	Y	C	C	Y	C
S20_1202050	G/A	20	1202050	+	NA	NA	NA	NA	NA	NA	G	G	G	G	R	G	R	G	R	R	R	G	G	A	R	G	R	G	R	G	G	G	R	R	G	R	R	R	G	G	G	R	R	R	R	R	R	R	G
S20_1220818	T/A	20	1220818	+	NA	NA	NA	NA	NA	NA	T	T	T	T	N	T	A	T	W	W	W	T	T	W	T	T	W	T	W	T	W	T	W	W	T	W	W	W	T	T	T	W	W	W	W	W	W	W	T
S20_1220971	C/T	20	1220971	+	NA	NA	NA	NA	NA	NA	C	C	C	C	Y	C	Y	C	Y	Y	Y	C	C	Y	C	C	Y	C	Y	C	Y	C	Y	Y	C	Y	Y	Y	C	C	C	Y	Y	Y	Y	Y	Y	Y	C
S20_1221071	C/A	20	1221071	+	NA	NA	NA	NA	NA	NA	C	C	C	C	N	C	M	C	M	M	M	C	C	M	N	C	M	C	M	C	C	C	M	M	C	M	M	C	M	C	C	M	M	M	M	M	M	A	C
S20_1221200	A/G	20	1221200	+	NA	NA	NA	NA	NA	NA	A	A	A	A	N	N	R	A	G	G	R	A	N	R	G	A	R	A	G	A	R	A	R	R	A	R	R	N	A	N	A	R	R	G	R	R	R	G	A
S20_1222009	G/C	20	1222009	+	NA	NA	NA	NA	NA	NA	G	G	G	G	G	N	S	G	G	G	S	G	G	S	G	G	N	N	S	G	S	G	S	S	G	S	G	G	G	G	G	S	S	C	C	S	S	S	G
S20_1228697	T/C	20	1228697	+	NA	NA	NA	NA	NA	NA	T	T	T	T	T	T	Y	T	Y	Y	T	T	T	Y	C	T	Y	T	Y	T	T	T	Y	T	T	T	Y	Y	T	T	T	T	T	Y	T	Y	Y	T	T
S20_1284805	T/A	20	1284805	+	NA	NA	NA	NA	NA	NA	T	T	T	T	N	N	W	T	T	N	W	T	T	A	T	T	W	T	W	T	T	T	W	W	T	W	W	T	T	T	T	N	W	A	W	W	W	W	T
S20_1296042	C/T	20	1296042	+	NA	NA	NA	NA	NA	NA	C	C	C	C	N	C	Y	C	Y	Y	Y	C	C	Y	Y	C	Y	C	Y	C	C	C	Y	Y	C	Y	Y	Y	C	C	C	Y	Y	Y	Y	Y	T	Y	C
S20_1352686	C/G	20	1352686	+	NA	NA	NA	NA	NA	NA	C	C	C	C	N	C	S	C	S	S	S	C	C	S	C	C	S	C	S	C	S	C	S	S	C	S	S	S	C	C	C	S	S	S	S	S	S	S	C
S20_1370396	A/T	20	1370396	+	NA	NA	NA	NA	NA	NA	A	A	A	A	W	A	A	A	A	A	W	A	A	A	A	A	A	A	A	A	A	A	A	W	A	W	A	A	A	A	A	W	A	A	W	A	A	W	A
S20_1372429	T/C	20	1372429	+	NA	NA	NA	NA	NA	NA	T	T	T	T	N	T	Y	T	T	Y	Y	T	T	C	N	N	Y	T	Y	T	T	T	T	T	T	Y	Y	T	N	T	T	Y	C	C	Y	Y	Y	Y	T
S20_1384029	C/A	20	1384029	+	NA	NA	NA	NA	NA	NA	C	C	C	C	M	C	M	C	M	M	M	C	C	M	M	C	M	C	M	C	M	C	M	M	C	M	M	M	C	C	C	M	M	M	M	M	M	M	C
S20_1479477	T	20	1479477	+	NA	NA	NA	NA	NA	NA	T	T	T	T	T	T	T	T	T	T	T	T	T	T	T	T	T	T	T	T	T	T	T	T	T	T	T	T	T	T	T	T	T	T	T	T	T	T	T
S20_1499080	T/C	20	1499080	+	NA	NA	NA	NA	NA	NA	T	T	T	T	C	T	Y	T	Y	Y	Y	T	T	Y	Y	T	Y	T	Y	T	Y	T	Y	Y	T	Y	Y	Y	T	T	T	Y	Y	Y	Y	Y	Y	Y	T
S20_1627669	T	20	1627669	+	NA	NA	NA	NA	NA	NA	T	T	T	T	T	T	T	T	T	T	T	T	T	T	T	T	T	T	T	T	T	T	T	T	T	T	T	T	T	T	T	T	T	T	T	T	T	T	T
S22_219978	A/G	22	219978	+	NA	NA	NA	NA	NA	NA	G	R	A	R	A	N	A	R	R	A	A	A	R	A	N	A	R	A	A	A	R	A	A	A	A	R	A	R	R	A	A	A	A	A	R	R	A	A	R
S22_221391	T/G	22	221391	+	NA	NA	NA	NA	NA	NA	T	K	T	K	T	K	T	T	K	T	T	T	K	T	T	T	K	T	T	T	K	T	T	T	T	T	T	K	K	T	T	T	T	T	T	K	T	T	T
S22_224659	A/G	22	224659	+	NA	NA	NA	NA	NA	NA	A	R	A	R	A	A	A	A	R	A	A	A	R	A	A	A	R	A	A	A	R	A	A	A	A	A	A	R	A	A	A	A	A	A	A	R	A	A	A
S22_224759	A/G	22	224759	+	NA	NA	NA	NA	NA	NA	R	A	A	A	A	A	A	R	A	A	A	A	A	A	N	N	A	A	A	A	A	A	A	A	A	R	A	A	N	A	A	A	A	A	R	A	A	A	R
S22_225718	T/A	22	225718	+	NA	NA	NA	NA	NA	NA	T	W	T	W	T	W	T	T	W	T	T	T	W	T	T	T	W	T	T	T	W	T	T	T	T	T	T	W	W	T	T	T	T	T	T	W	T	T	T
S22_238656	A	22	238656	+	NA	NA	NA	NA	NA	NA	A	A	A	A	A	A	A	A	A	A	A	A	A	A	A	A	A	A	A	A	A	A	A	A	A	A	A	A	A	A	A	A	A	A	A	A	A	A	A
S22_322301	C/A	22	322301	+	NA	NA	NA	NA	NA	NA	M	C	C	C	C	C	C	M	C	C	C	C	C	C	C	C	C	C	C	C	C	C	C	C	C	M	C	C	C	C	C	C	C	C	M	C	C	C	M
S22_324396	A/G	22	324396	+	NA	NA	NA	NA	NA	NA	A	R	A	A	G	A	R	R	A	A	A	A	A	A	A	R	A	A	R	A	A	A	A	A	A	A	A	A	A	N	R	A	R	A	A	A	A	A	A
S22_355300	T/C	22	355300	+	NA	NA	NA	NA	NA	NA	Y	Y	T	Y	T	Y	T	Y	Y	T	T	T	Y	T	T	T	Y	T	T	T	Y	T	T	T	T	Y	T	Y	Y	T	T	T	T	T	Y	Y	T	T	Y
S22_417972	C/T	22	417972	+	NA	NA	NA	NA	NA	NA	C	Y	C	Y	C	Y	C	C	Y	C	C	C	Y	C	C	C	Y	C	C	C	Y	C	C	C	C	C	C	Y	Y	C	C	C	C	C	C	Y	C	C	C
S22_418107	G/A	22	418107	+	NA	NA	NA	NA	NA	NA	G	R	G	R	G	A	G	G	R	G	G	G	R	G	N	G	R	G	G	G	R	G	G	G	G	G	G	R	R	G	G	G	G	G	G	R	G	G	G
S22_435308	A/T	22	435308	+	NA	NA	NA	NA	NA	NA	W	W	A	W	A	W	A	W	W	A	A	A	W	A	A	A	W	A	A	A	W	A	A	A	A	W	A	W	W	A	A	A	A	A	W	W	A	A	W
S23_43329	G/A	23	43329	+	NA	NA	NA	NA	NA	NA	G	G	G	G	N	A	R	R	G	G	G	G	G	G	N	G	G	G	N	G	R	G	G	G	G	G	R	G	N	G	R	G	R	G	G	G	A	R	G
S23_59912	C/G	23	59912	+	NA	NA	NA	NA	NA	NA	C	C	C	C	S	N	C	S	C	C	C	C	C	C	N	C	C	C	G	C	N	C	C	C	C	C	C	C	C	G	S	C	S	C	C	C	C	S	C
S23_66259	T/C	23	66259	+	NA	NA	NA	NA	NA	NA	T	T	T	T	Y	Y	Y	Y	T	T	T	T	T	T	Y	Y	T	T	Y	T	Y	T	T	T	T	T	Y	T	Y	Y	Y	T	Y	T	T	T	Y	Y	T
S23_92928	C/G	23	92928	+	NA	NA	NA	NA	NA	NA	C	C	C	C	S	N	S	S	C	C	C	C	C	C	G	N	C	C	S	C	N	C	C	C	C	C	C	C	C	C	G	C	S	C	C	C	S	S	C
S23_103906	G/C	23	103906	+	NA	NA	NA	NA	NA	NA	G	G	G	G	G	S	S	G	G	G	G	G	G	G	G	S	G	G	S	G	G	G	G	G	G	G	S	G	S	S	S	G	S	G	G	G	S	S	G
S23_113173	G/A	23	113173	+	NA	NA	NA	NA	NA	NA	N	G	G	G	R	N	R	R	G	G	G	N	N	G	G	N	G	G	A	G	R	G	G	G	G	G	G	G	N	R	R	G	A	N	G	G	A	N	G
S23_171056	G/A	23	171056	+	NA	NA	NA	NA	NA	NA	G	G	G	G	R	R	R	R	G	G	G	G	G	G	A	A	G	G	R	G	R	G	G	G	G	G	R	G	G	R	R	G	R	G	G	G	R	R	G
S23_182526	G/C	23	182526	+	NA	NA	NA	NA	NA	NA	G	G	G	G	S	C	S	S	G	G	G	G	G	G	S	S	G	G	S	G	S	G	G	G	G	G	S	G	G	G	S	G	S	G	G	G	C	G	G
S23_191645	C/A	23	191645	+	NA	NA	NA	NA	NA	NA	C	C	C	C	M	C	M	M	C	C	C	C	C	C	A	A	C	C	M	C	M	C	C	C	C	C	M	C	A	M	M	C	M	C	C	C	M	M	C
S23_196996	T/C	23	196996	+	NA	NA	NA	NA	NA	NA	T	T	T	T	C	Y	Y	Y	T	T	T	T	T	T	T	Y	T	T	Y	T	Y	T	T	T	T	T	Y	T	Y	Y	Y	T	Y	T	T	T	Y	Y	T
S23_198710	T/C	23	198710	+	NA	NA	NA	NA	NA	NA	T	T	T	T	Y	Y	Y	Y	T	T	T	T	T	T	T	T	T	T	Y	T	Y	T	T	T	T	T	Y	T	Y	Y	Y	T	Y	T	T	T	Y	Y	T
S23_213354	C/T	23	213354	+	NA	NA	NA	NA	NA	NA	C	C	C	C	Y	Y	Y	Y	C	C	C	C	C	C	C	Y	C	C	Y	C	Y	C	C	C	C	C	Y	C	Y	Y	Y	C	Y	C	C	C	Y	Y	C
S23_230532	A/G	23	230532	+	NA	NA	NA	NA	NA	NA	A	A	A	A	G	G	R	R	A	A	A	A	A	A	R	R	A	A	R	A	R	A	A	A	A	A	R	A	R	R	R	A	R	A	A	A	R	R	A
S23_252836	A/G	23	252836	+	NA	NA	NA	NA	NA	NA	A	A	A	A	R	A	R	R	A	A	A	A	A	A	R	G	A	A	R	A	R	A	A	A	A	A	R	A	R	R	R	A	A	A	A	A	R	R	A
S23_252969	C/T	23	252969	+	NA	NA	NA	NA	NA	NA	C	C	C	C	Y	Y	Y	Y	C	C	C	C	C	C	Y	Y	C	C	Y	C	Y	C	C	C	C	C	Y	C	Y	Y	Y	C	Y	C	C	C	Y	Y	C
S23_281537	G/T	23	281537	+	NA	NA	NA	NA	NA	NA	K	K	G	G	G	G	G	K	K	G	G	N	K	G	G	G	K	G	G	G	G	G	G	K	G	G	G	K	G	G	G	G	G	G	G	K	G	G	K
S23_281638	G/T	23	281638	+	NA	NA	NA	NA	NA	NA	K	K	G	K	N	T	T	K	K	G	K	G	K	G	K	T	K	G	K	G	K	G	G	K	G	K	K	K	T	T	T	G	K	G	K	K	T	T	K
S23_283396	T/A	23	283396	+	NA	NA	NA	NA	NA	NA	A	W	T	W	T	W	T	W	A	T	W	T	W	N	T	T	W	T	T	T	W	T	T	W	T	A	T	A	W	T	T	T	T	T	A	A	T	T	W
S23_283502	C/T	23	283502	+	NA	NA	NA	NA	NA	NA	C	C	C	C	C	Y	Y	C	C	C	C	C	C	C	T	Y	C	C	C	C	Y	C	C	C	C	C	Y	C	Y	Y	Y	C	C	C	C	C	Y	Y	C
S23_288669	G/C	23	288669	+	NA	NA	NA	NA	NA	NA	G	G	G	G	G	S	S	G	G	G	G	G	G	G	S	S	G	G	S	G	S	G	G	G	G	G	S	G	S	S	S	G	S	G	G	G	S	S	G
S23_288780	G/T	23	288780	+	NA	NA	NA	NA	NA	NA	G	G	G	G	G	G	K	K	G	G	G	G	G	G	T	K	G	G	K	G	K	G	G	G	G	G	T	G	K	K	K	G	K	G	G	G	K	K	G
S23_288908	C/T	23	288908	+	NA	NA	NA	NA	NA	NA	C	C	C	C	Y	Y	Y	Y	C	C	C	C	C	C	Y	Y	C	C	Y	C	Y	C	C	C	C	C	Y	C	Y	Y	Y	C	Y	C	C	C	Y	Y	C
S23_290270	A/G	23	290270	+	NA	NA	NA	NA	NA	NA	A	A	A	A	R	A	A	R	A	A	A	A	A	A	A	A	A	A	A	A	A	A	A	A	A	A	A	A	A	A	A	A	A	A	A	A	A	A	A
S23_290402	C/A	23	290402	+	NA	NA	NA	NA	NA	NA	C	C	C	C	A	A	M	M	C	C	C	C	C	C	M	M	C	C	M	C	C	C	C	C	C	C	M	C	C	M	M	C	M	C	C	C	M	M	C
S23_300612	A/G	23	300612	+	NA	NA	NA	NA	NA	NA	A	A	A	A	A	G	R	A	A	A	A	A	A	A	G	G	A	A	R	A	R	A	A	A	A	A	R	A	N	G	R	A	R	A	A	A	R	R	A
S23_300760	G/A	23	300760	+	NA	NA	NA	NA	NA	NA	G	G	G	G	R	R	R	R	G	G	G	G	G	G	R	R	G	G	R	G	R	G	G	G	G	G	R	G	R	R	R	G	R	G	G	G	R	R	G
S23_314917	A/T	23	314917	+	NA	NA	NA	NA	NA	NA	A	A	A	A	T	A	T	A	A	A	A	A	A	A	T	W	A	A	W	A	W	A	A	A	A	A	W	A	W	W	W	A	W	A	A	A	W	W	A
S23_320248	G/C	23	320248	+	NA	NA	NA	NA	NA	NA	G	G	S	G	G	G	G	G	G	G	G	G	G	G	G	G	G	G	G	G	G	G	G	G	G	G	G	G	G	G	G	G	G	G	G	G	G	G	G
S23_337316	G/A	23	337316	+	NA	NA	NA	NA	NA	NA	G	G	G	G	R	R	R	R	G	G	G	G	G	G	A	R	G	G	R	G	R	G	G	G	G	G	R	G	R	R	R	G	R	G	G	G	R	R	G
S23_368580	G/T	23	368580	+	NA	NA	NA	NA	NA	NA	G	G	G	G	K	K	K	K	G	G	G	G	G	G	K	K	G	G	K	G	K	G	G	G	G	G	K	G	K	K	K	G	K	G	G	G	K	K	G
S23_381960	G/C	23	381960	+	NA	NA	NA	NA	NA	NA	G	G	G	G	G	N	S	G	G	G	G	G	G	G	N	S	G	G	S	G	S	G	G	G	G	G	S	G	C	S	S	G	S	G	G	G	S	C	G
S23_385163	C/T	23	385163	+	NA	NA	NA	NA	NA	NA	C	C	C	C	C	C	Y	Y	C	C	C	C	C	C	N	Y	C	C	C	C	Y	C	C	C	C	C	Y	C	N	C	T	C	Y	C	C	C	Y	T	C
S23_385964	A/C	23	385964	+	NA	NA	NA	NA	NA	NA	A	A	A	A	C	M	M	M	A	A	A	A	A	A	C	M	A	A	M	A	M	A	A	A	A	A	M	A	M	M	M	A	M	A	A	A	M	M	A
S23_392297	G/C	23	392297	+	NA	NA	NA	NA	NA	NA	G	G	G	G	G	C	S	S	G	G	G	G	G	G	N	C	G	G	S	G	S	G	G	G	G	G	S	G	S	G	S	G	C	G	G	G	S	S	G
S23_392435	A/T	23	392435	+	NA	NA	NA	NA	NA	NA	A	A	A	A	N	W	W	W	A	A	A	A	A	A	A	T	A	A	W	A	W	A	A	A	A	A	W	A	W	A	A	A	W	A	A	A	W	W	A
S23_406336	C/A	23	406336	+	NA	NA	NA	NA	NA	NA	C	C	C	C	C	N	C	C	C	C	C	C	C	C	C	C	C	C	C	C	C	C	C	C	C	C	C	C	C	C	C	C	C	C	C	C	C	C	C
S23_407601	T/G	23	407601	+	NA	NA	NA	NA	NA	NA	T	T	K	T	T	T	T	T	T	T	T	T	T	T	N	T	T	T	T	T	T	T	T	T	T	T	T	T	T	T	T	T	T	T	T	T	T	T	T
S23_442984	C/G	23	442984	+	NA	NA	NA	NA	NA	NA	C	C	C	C	C	N	S	S	C	C	C	C	C	C	G	S	C	C	S	C	S	C	C	C	C	C	S	C	G	S	S	C	S	C	C	C	S	S	C
S23_472735	A/C	23	472735	+	NA	NA	NA	NA	NA	NA	M	M	M	M	M	M	M	M	M	M	M	M	M	M	M	M	M	M	M	M	M	M	M	M	M	M	M	M	M	M	M	M	M	M	M	M	M	M	M
S23_475150	G/A	23	475150	+	NA	NA	NA	NA	NA	NA	G	G	G	G	G	N	G	G	G	G	G	G	G	G	N	G	G	G	G	G	G	G	G	G	G	G	G	G	N	G	G	G	G	G	G	G	G	G	G
S23_495534	G/C	23	495534	+	NA	NA	NA	NA	NA	NA	G	G	G	G	G	G	G	G	G	G	G	G	G	G	G	G	G	G	G	G	G	G	G	G	G	G	G	G	G	G	G	G	G	G	G	G	G	G	G
S23_496486	G/A	23	496486	+	NA	NA	NA	NA	NA	NA	G	G	G	G	G	G	G	G	G	G	G	G	G	G	N	G	G	G	G	G	G	G	G	G	G	G	G	G	G	G	G	G	G	G	G	G	G	G	G
S23_640120	A/G	23	640120	+	NA	NA	NA	NA	NA	NA	A	R	A	A	A	A	R	R	A	A	A	A	A	A	N	R	A	A	R	A	R	A	A	A	A	A	R	A	R	R	R	A	R	A	A	A	R	R	A
S23_640248	T/C	23	640248	+	NA	NA	NA	NA	NA	NA	T	Y	T	T	Y	Y	Y	Y	T	T	T	T	T	T	N	Y	T	T	C	T	T	T	T	T	T	T	Y	T	C	Y	Y	T	Y	T	T	T	Y	Y	T
S23_656594	C/A	23	656594	+	NA	NA	NA	NA	NA	NA	C	M	C	C	M	M	M	M	C	C	C	C	C	C	M	M	C	C	M	C	M	C	C	C	C	C	M	C	M	M	M	C	M	C	C	C	M	M	C
S23_666680	T/C	23	666680	+	NA	NA	NA	NA	NA	NA	T	Y	T	T	Y	Y	Y	Y	T	T	T	T	T	T	N	Y	T	T	Y	T	Y	T	T	T	T	T	Y	T	Y	Y	Y	T	Y	T	T	T	Y	Y	T
S23_668276	G/A	23	668276	+	NA	NA	NA	NA	NA	NA	G	R	G	G	A	R	R	R	G	G	G	G	G	G	N	A	G	G	G	G	R	G	G	G	G	G	R	G	G	R	R	G	R	G	G	G	R	G	G
S23_668396	A/T	23	668396	+	NA	NA	NA	NA	NA	NA	A	W	A	A	N	W	W	W	A	A	A	A	A	A	N	A	A	N	W	A	W	A	A	A	A	A	W	A	N	W	W	A	W	A	A	A	W	W	A
S23_688472	A/T	23	688472	+	NA	NA	NA	NA	NA	NA	N	W	A	A	A	N	A	A	A	A	A	A	A	A	N	W	A	A	W	A	W	A	A	A	A	A	W	N	T	W	W	A	W	A	A	A	W	A	A
S23_688643	C/T	23	688643	+	NA	NA	NA	NA	NA	NA	C	Y	C	C	Y	Y	Y	Y	C	C	C	C	C	C	C	Y	C	C	Y	C	Y	C	C	C	C	C	Y	C	Y	Y	Y	C	Y	C	C	C	Y	Y	C
S23_693095	G/T	23	693095	+	NA	NA	NA	NA	NA	NA	G	G	K	G	N	G	G	G	G	G	G	G	G	G	N	G	G	G	G	G	G	G	G	G	G	G	G	G	G	G	G	G	G	G	G	K	G	G	G
S23_714436	A/G	23	714436	+	NA	NA	NA	NA	NA	NA	A	A	R	A	N	A	A	A	A	A	A	A	A	A	N	A	A	A	A	A	A	A	A	A	A	A	A	A	A	A	A	A	A	A	A	A	A	A	A
S23_720817	G/T	23	720817	+	NA	NA	NA	NA	NA	NA	G	K	G	G	K	T	K	K	G	G	G	G	G	G	T	K	G	G	K	G	K	G	G	G	G	G	K	G	K	K	K	G	K	G	G	G	K	K	G
S23_722826	C/T	23	722826	+	NA	NA	NA	NA	NA	NA	C	Y	C	C	Y	Y	Y	Y	C	C	C	C	C	C	Y	Y	C	C	Y	C	Y	C	C	C	C	C	Y	C	Y	Y	Y	C	Y	C	C	C	Y	Y	C
S23_766725	C/A	23	766725	+	NA	NA	NA	NA	NA	NA	C	M	C	C	A	A	C	M	C	C	C	C	C	C	C	M	C	C	A	C	M	C	C	C	C	C	A	C	N	A	C	C	M	C	C	C	M	M	C
S23_766864	A/C	23	766864	+	NA	NA	NA	NA	NA	NA	A	M	A	A	M	N	M	M	A	A	A	A	A	A	M	M	A	A	M	A	M	A	A	A	A	A	M	A	M	M	M	A	M	A	A	A	M	M	A
S23_767159	A/G	23	767159	+	NA	NA	NA	NA	NA	NA	A	R	A	A	R	R	R	R	A	A	A	A	A	A	R	R	A	A	R	A	R	A	A	A	A	A	R	A	R	R	R	A	R	A	A	A	R	R	A
S23_767337	G/C	23	767337	+	NA	NA	NA	NA	NA	NA	G	S	G	G	S	S	S	S	G	G	G	G	G	G	S	S	G	G	S	G	S	G	G	G	G	G	S	G	S	S	S	G	S	G	G	G	S	S	G
S23_797110	T/G	23	797110	+	NA	NA	NA	NA	NA	NA	T	K	T	T	T	N	K	K	T	T	T	T	T	T	T	K	T	T	K	T	N	T	T	T	T	T	K	T	G	T	K	T	K	T	T	T	K	K	T
S23_799605	A/C	23	799605	+	NA	NA	NA	NA	NA	NA	A	M	A	A	A	M	M	A	A	A	A	A	A	A	C	M	A	A	M	A	M	A	A	A	A	A	M	A	C	M	M	A	M	A	A	A	M	M	A
S23_799732	C/G	23	799732	+	NA	NA	NA	NA	NA	NA	C	S	C	C	G	C	S	S	C	C	C	C	C	C	G	S	C	C	S	C	S	C	C	C	C	C	G	C	S	S	S	C	S	C	C	C	S	S	C
S23_799841	A/G	23	799841	+	NA	NA	NA	NA	NA	NA	A	R	A	A	A	R	R	A	A	A	A	A	A	A	R	R	A	A	R	A	R	A	A	A	A	A	R	A	R	R	R	A	R	A	A	A	R	R	A
S23_859010	T/A	23	859010	+	NA	NA	NA	NA	NA	NA	N	W	W	W	N	T	T	A	W	W	W	W	W	W	N	N	W	W	W	W	W	W	T	T	T	W	N	W	W	A	T	W	W	W	W	W	A	W	W
S25_180667	A/G	25	180667	+	NA	NA	NA	NA	NA	NA	A	A	A	A	A	N	R	A	A	A	R	R	A	A	N	A	A	R	A	A	G	A	R	A	A	A	R	A	A	A	A	N	N	A	R	R	R	A	A
S26_115520	A/G	26	115520	+	NA	NA	NA	NA	NA	NA	A	R	A	R	A	R	A	N	A	R	A	A	R	R	A	A	A	R	R	A	R	A	R	G	A	A	A	A	A	R	R	A	A	A	A	R	A	A	A
S26_144507	C/T	26	144507	+	NA	NA	NA	NA	NA	NA	C	C	C	C	C	C	C	C	C	C	Y	C	C	C	C	N	C	C	C	C	C	C	C	C	C	Y	C	C	C	C	C	C	C	C	C	C	C	N	C
S26_170646	T/C	26	170646	+	NA	NA	NA	NA	NA	NA	T	T	T	Y	T	T	C	N	T	Y	C	T	T	C	N	T	T	T	Y	N	T	T	Y	C	T	N	T	T	N	N	T	T	T	T	T	Y	T	T	T
S26_170746	C/T	26	170746	+	NA	NA	NA	NA	NA	NA	C	Y	N	Y	C	N	N	C	C	C	Y	C	T	C	N	N	C	C	Y	C	T	C	Y	Y	C	C	C	Y	N	T	Y	C	C	C	C	Y	C	C	C
S26_174673	A/G	26	174673	+	NA	NA	NA	NA	NA	NA	A	A	A	A	A	A	A	A	A	A	R	A	A	A	A	A	A	A	A	A	A	A	A	A	A	R	A	A	A	A	A	A	A	A	A	A	A	A	A
S26_175438	G/A	26	175438	+	NA	NA	NA	NA	NA	NA	G	G	G	G	G	G	G	G	G	G	G	G	G	R	G	G	G	G	G	G	G	G	G	G	G	G	G	G	G	R	R	G	G	G	G	G	G	G	G
S26_218148	T/A	26	218148	+	NA	NA	NA	NA	NA	NA	T	T	T	T	T	T	T	T	T	T	T	T	T	T	T	T	T	T	T	T	T	T	T	T	T	T	T	T	T	T	T	T	T	T	T	T	T	T	T
S26_245397	C/T	26	245397	+	NA	NA	NA	NA	NA	NA	N	C	N	C	C	C	C	C	C	C	C	C	C	C	C	C	C	C	C	C	C	C	C	C	C	C	C	C	C	C	N	C	N	C	C	C	C	C	C
S26_250110	C/G	26	250110	+	NA	NA	NA	NA	NA	NA	C	S	C	S	C	G	S	C	C	S	C	C	G	C	N	C	C	N	C	C	C	C	S	C	C	C	C	S	C	G	G	C	C	C	C	S	C	C	C
S26_251994	C/T	26	251994	+	NA	NA	NA	NA	NA	NA	C	C	C	C	C	Y	C	C	C	C	C	C	C	Y	C	C	C	Y	C	C	C	C	C	C	C	C	C	C	C	C	C	C	C	C	C	C	C	C	C
S26_259856	A/T	26	259856	+	NA	NA	NA	NA	NA	NA	A	W	A	W	A	W	W	A	A	W	W	A	W	W	A	A	A	W	W	A	W	A	W	W	A	W	A	W	A	W	W	A	A	A	A	W	A	A	A
S26_260182	T/A	26	260182	+	NA	NA	NA	NA	NA	NA	T	W	T	W	T	W	W	T	T	W	W	T	W	W	T	T	T	W	W	T	W	T	W	W	T	W	T	W	T	W	W	T	T	T	T	W	T	T	T
S26_260321	T/A	26	260321	+	NA	NA	NA	NA	NA	NA	T	W	T	W	T	T	W	T	T	W	W	T	W	W	N	T	T	W	W	T	W	T	W	W	T	W	T	W	T	W	A	T	T	T	T	W	T	T	T
S26_272781	C/T	26	272781	+	NA	NA	NA	NA	NA	NA	C	Y	C	Y	C	T	Y	C	C	Y	Y	C	C	Y	C	C	C	N	Y	C	Y	C	Y	Y	C	Y	C	C	C	N	Y	C	C	C	C	C	C	C	C
S26_275230	C/A	26	275230	+	NA	NA	NA	NA	NA	NA	C	M	C	M	C	M	M	C	C	M	M	C	M	M	C	C	C	M	M	C	M	C	M	M	C	M	C	M	C	M	M	C	C	C	C	M	C	C	C
S26_275698	G/A	26	275698	+	NA	NA	NA	NA	NA	NA	G	R	G	R	G	A	R	G	G	R	R	G	R	R	N	N	G	R	R	G	R	G	R	R	G	R	G	R	N	N	R	G	G	N	G	R	G	G	G
S26_296359	T	26	296359	+	NA	NA	NA	NA	NA	NA	T	T	T	T	T	T	T	T	T	T	T	T	T	T	T	T	T	T	T	T	T	T	T	T	T	T	T	T	T	T	T	T	T	T	T	T	T	T	T
S26_298296	T/C	26	298296	+	NA	NA	NA	NA	NA	NA	T	Y	T	Y	T	C	Y	T	T	Y	T	T	Y	Y	T	T	T	Y	Y	T	C	T	Y	Y	T	T	T	Y	T	Y	Y	T	T	T	T	Y	T	T	T
S26_340556	T/A	26	340556	+	NA	NA	NA	NA	NA	NA	T	W	T	W	T	W	W	T	T	T	T	T	W	W	T	T	T	N	W	T	T	T	W	W	T	T	T	T	W	T	W	T	T	T	T	W	T	T	T
S26_371017	T/C	26	371017	+	NA	NA	NA	NA	NA	NA	N	Y	T	Y	T	C	Y	T	T	T	Y	N	T	Y	T	T	T	T	Y	T	T	T	Y	Y	T	Y	T	Y	T	Y	Y	T	T	T	T	Y	T	T	T
S26_371151	T/A	26	371151	+	NA	NA	NA	NA	NA	NA	T	W	T	W	T	A	W	T	T	W	T	T	W	W	N	T	T	W	T	T	A	T	W	W	T	W	T	W	T	W	W	T	T	N	T	W	T	T	T
S26_382714	C/A	26	382714	+	NA	NA	NA	NA	NA	NA	C	M	C	M	C	C	M	C	C	M	M	C	A	M	C	C	C	M	M	C	M	C	M	M	C	M	C	M	C	M	M	C	C	C	C	M	C	C	C
S26_428229	A/G	26	428229	+	NA	NA	NA	NA	NA	NA	A	A	N	R	A	N	R	R	R	A	R	A	R	A	N	A	A	N	A	A	R	A	R	A	A	R	R	R	A	R	A	A	A	A	A	A	R	A	A
S26_440119	C/T	26	440119	+	NA	NA	NA	NA	NA	NA	C	Y	N	Y	N	N	C	C	C	Y	Y	C	Y	T	C	C	C	T	T	C	T	C	Y	C	C	C	C	Y	C	C	Y	C	C	C	C	C	C	C	C
S26_446495	T/A	26	446495	+	NA	NA	NA	NA	NA	NA	T	W	T	W	T	W	W	T	T	W	W	T	W	W	T	T	T	W	W	T	W	T	W	W	T	W	T	W	T	W	W	T	T	T	T	W	T	T	T
S26_446617	A/T	26	446617	+	NA	NA	NA	NA	NA	NA	A	W	A	W	N	W	T	A	A	N	A	A	T	T	N	A	A	T	W	A	T	A	W	W	A	N	A	W	A	T	W	N	A	N	A	W	A	A	A
S26_451675	T/C	26	451675	+	NA	NA	NA	NA	NA	NA	N	Y	T	Y	T	N	Y	T	T	C	Y	T	Y	C	T	T	T	Y	Y	T	C	T	Y	Y	T	Y	T	Y	N	Y	Y	N	T	T	T	T	T	T	T
S26_507194	T/G	26	507194	+	NA	NA	NA	NA	NA	NA	T	K	T	K	T	K	K	T	T	K	T	T	K	K	T	T	T	K	K	T	K	T	K	K	T	T	T	K	T	K	K	T	T	T	T	K	T	T	T
S26_525720	C/T	26	525720	+	NA	NA	NA	NA	NA	NA	C	Y	C	Y	C	Y	Y	C	C	Y	C	C	C	Y	C	C	C	Y	Y	C	Y	C	Y	Y	C	C	C	Y	C	Y	Y	C	C	C	C	Y	C	C	C
S26_553474	C/T	26	553474	+	NA	NA	NA	NA	NA	NA	C	C	C	C	C	C	C	C	C	C	Y	C	C	C	C	C	C	C	C	C	C	C	C	C	C	Y	C	C	C	C	C	C	C	C	C	C	C	C	C
S26_603153	T/C	26	603153	+	NA	NA	NA	NA	NA	NA	T	T	T	T	Y	T	T	T	T	T	T	T	T	T	T	N	T	T	T	T	T	T	T	Y	T	T	T	T	T	T	T	T	T	T	Y	T	T	T	T
S26_606679	C/G	26	606679	+	NA	NA	NA	NA	NA	NA	C	C	C	C	C	C	C	C	C	C	C	C	C	C	C	C	C	C	C	C	C	C	C	C	C	C	C	C	C	C	C	C	C	C	C	C	C	C	C
S26_608020	G/A	26	608020	+	NA	NA	NA	NA	NA	NA	G	R	G	G	G	N	G	G	G	R	G	G	N	R	N	N	G	N	G	R	G	G	R	G	G	A	G	G	N	G	R	G	G	N	R	G	G	N	G
S26_665935	G/C	26	665935	+	NA	NA	NA	NA	NA	NA	G	S	G	S	G	N	S	G	G	S	S	G	S	S	G	G	G	S	S	G	C	G	S	G	G	S	N	C	G	S	S	G	G	G	G	S	G	G	G
S26_667020	C/T	26	667020	+	NA	NA	NA	NA	NA	NA	C	Y	C	Y	C	Y	Y	C	C	Y	Y	C	Y	Y	C	C	C	Y	Y	C	Y	C	Y	Y	C	Y	C	Y	C	Y	Y	C	C	C	C	Y	C	C	C
S26_680819	T/C	26	680819	+	NA	NA	NA	NA	NA	NA	T	Y	T	Y	T	Y	Y	T	T	Y	Y	T	Y	Y	T	T	T	Y	Y	T	Y	T	Y	Y	T	Y	T	Y	T	Y	Y	T	T	T	T	Y	T	T	T
S26_685066	A/G	26	685066	+	NA	NA	NA	NA	NA	NA	N	A	A	A	A	A	A	A	A	A	A	A	A	A	N	A	A	A	A	A	A	A	A	A	A	A	A	A	A	A	A	N	A	A	A	A	A	A	A
S26_715883	T/C	26	715883	+	NA	NA	NA	NA	NA	NA	T	Y	T	Y	T	N	Y	T	T	C	Y	T	T	Y	T	T	T	Y	Y	T	Y	T	Y	Y	T	Y	T	Y	T	Y	Y	T	T	T	T	Y	T	T	T
S26_765742	G/A	26	765742	+	NA	NA	NA	NA	NA	NA	G	G	G	G	G	G	G	G	G	G	R	G	G	G	G	G	G	G	G	G	G	G	G	G	G	R	G	G	G	G	G	G	G	G	G	G	G	G	G
S26_783225	A/G	26	783225	+	NA	NA	NA	NA	NA	NA	A	R	A	R	A	R	R	A	A	R	R	A	R	R	A	A	A	R	R	A	R	A	R	R	A	R	A	R	A	R	A	A	A	A	A	R	A	A	A
S26_832068	A/T	26	832068	+	NA	NA	NA	NA	NA	NA	A	A	A	A	A	A	A	A	A	A	W	A	A	A	A	A	A	A	A	A	A	A	A	A	A	W	A	A	A	A	A	A	A	A	A	A	A	A	A
S26_836268	G/T	26	836268	+	NA	NA	NA	NA	NA	NA	G	K	G	K	G	K	K	G	G	K	K	G	K	K	G	G	G	K	K	G	K	G	K	K	G	K	G	K	G	K	G	G	G	G	G	K	G	G	G
S26_838935	T/C	26	838935	+	NA	NA	NA	NA	NA	NA	T	Y	T	Y	T	Y	Y	T	T	Y	Y	T	Y	Y	T	T	T	Y	Y	T	Y	T	Y	Y	T	Y	T	Y	T	Y	T	T	T	T	T	Y	T	T	T
S26_846068	A/G	26	846068	+	NA	NA	NA	NA	NA	NA	A	R	A	R	N	G	R	A	A	A	A	A	G	R	N	A	A	G	R	A	R	A	R	R	A	A	A	R	A	R	A	A	A	A	A	R	A	A	A
S26_918355	C/T	26	918355	+	NA	NA	NA	NA	NA	NA	C	C	C	C	C	C	C	C	C	C	Y	C	C	C	C	C	C	C	C	C	C	C	C	C	C	Y	C	C	C	C	C	C	C	C	C	C	C	C	C
S26_924096	C/T	26	924096	+	NA	NA	NA	NA	NA	NA	C	Y	C	Y	C	Y	Y	C	C	Y	Y	C	Y	Y	C	C	C	Y	Y	C	Y	C	Y	Y	C	Y	C	Y	C	Y	C	C	C	C	C	Y	C	C	C
S26_952919	T/C	26	952919	+	NA	NA	NA	NA	NA	NA	Y	Y	T	Y	Y	N	Y	Y	Y	C	C	Y	Y	Y	N	Y	Y	Y	N	Y	Y	Y	Y	Y	Y	N	Y	Y	T	Y	Y	Y	T	T	Y	Y	C	Y	T
S26_1040750	T/A	26	1040750	+	NA	NA	NA	NA	NA	NA	T	T	T	T	T	T	T	T	T	T	W	T	T	T	T	T	T	T	T	T	T	T	T	T	T	W	T	T	T	T	T	T	T	T	T	T	T	T	T
S26_1050584	T/A	26	1050584	+	NA	NA	NA	NA	NA	NA	T	W	T	W	N	A	W	T	T	W	T	T	W	W	T	T	T	A	W	T	W	T	W	W	T	T	T	W	T	N	T	T	T	T	T	W	T	T	T
S26_1075253	C/A	26	1075253	+	NA	NA	NA	NA	NA	NA	C	M	C	M	C	A	M	C	C	M	M	C	M	M	N	C	C	M	A	C	M	C	M	M	C	M	C	M	C	A	C	C	C	C	C	M	C	C	C
S26_1076677	T/A	26	1076677	+	NA	NA	NA	NA	NA	NA	T	W	T	W	N	T	W	T	T	W	W	T	W	W	N	T	T	W	W	T	W	T	W	W	T	W	T	W	T	W	T	T	T	T	T	W	T	T	T
S26_1076788	A/G	26	1076788	+	NA	NA	NA	NA	NA	NA	A	R	A	R	A	G	G	A	A	A	R	A	R	R	A	A	A	G	R	A	G	A	R	R	A	R	A	R	A	N	A	A	A	A	A	R	A	A	A
S26_1127510	C/T	26	1127510	+	NA	NA	NA	NA	NA	NA	C	Y	C	Y	C	Y	Y	C	C	Y	Y	C	Y	Y	C	C	C	Y	Y	C	Y	C	Y	Y	C	Y	C	Y	C	Y	C	C	C	C	C	Y	C	C	C
S26_1130165	T/C	26	1130165	+	NA	NA	NA	NA	NA	NA	T	Y	T	Y	T	C	Y	T	T	N	Y	T	Y	Y	T	T	T	T	T	T	Y	T	Y	Y	T	Y	T	Y	T	Y	T	T	T	T	T	Y	T	T	T
S26_1130284	T/C	26	1130284	+	NA	NA	NA	NA	NA	NA	T	Y	T	Y	T	C	Y	T	T	Y	Y	T	Y	Y	N	T	T	Y	T	T	Y	T	Y	Y	T	Y	T	Y	T	Y	T	T	T	T	T	Y	T	T	T
S26_1154121	A/G	26	1154121	+	NA	NA	NA	NA	NA	NA	A	R	A	R	N	N	R	A	A	R	A	A	R	R	N	A	A	R	R	A	R	A	R	R	A	A	A	R	A	G	A	A	A	A	A	R	A	A	A
S26_1169880	G/A	26	1169880	+	NA	NA	NA	NA	NA	NA	G	R	G	R	N	N	N	G	G	N	R	G	G	G	N	G	G	A	A	G	R	G	R	R	G	R	G	R	G	R	G	G	G	N	G	A	G	G	G
S26_1207319	A/G	26	1207319	+	NA	NA	NA	NA	NA	NA	A	R	A	R	A	A	R	A	A	R	R	A	R	R	N	A	A	R	R	A	R	A	R	R	A	R	A	R	A	R	A	A	A	A	A	A	A	A	A
S26_1207419	C/T	26	1207419	+	NA	NA	NA	NA	NA	NA	C	Y	C	Y	C	Y	C	C	C	Y	Y	C	Y	T	C	C	C	Y	Y	C	Y	C	Y	Y	C	Y	C	Y	C	Y	C	C	C	C	C	Y	C	C	C
S26_1238087	G/A	26	1238087	+	NA	NA	NA	NA	NA	NA	G	R	G	R	G	G	R	G	G	R	R	G	R	R	G	G	G	R	R	G	R	G	R	R	G	R	G	R	G	R	G	G	G	G	G	R	G	G	G
S26_1261643	A/G	26	1261643	+	NA	NA	NA	NA	NA	NA	A	R	A	R	N	N	R	A	A	G	R	A	A	R	N	A	A	N	R	A	R	A	R	R	A	R	A	R	A	N	A	A	A	A	A	R	A	A	A
S26_1269608	C/A	26	1269608	+	NA	NA	NA	NA	NA	NA	C	M	C	M	N	M	M	C	C	M	M	C	M	M	C	C	C	M	C	C	M	C	M	M	C	M	C	M	C	A	C	C	C	C	C	M	C	C	C
S26_1302935	T/A	26	1302935	+	NA	NA	NA	NA	NA	NA	T	T	T	T	T	W	T	T	T	T	W	T	T	W	T	T	T	W	W	T	T	T	T	T	T	W	T	T	T	W	T	T	T	T	T	T	T	T	T
S26_1310962	G/C	26	1310962	+	NA	NA	NA	NA	NA	NA	G	S	G	S	G	S	S	G	G	S	S	G	S	S	G	G	G	S	S	G	S	G	S	S	G	S	G	S	G	S	G	G	G	G	G	S	G	G	G
S26_1313057	T/C	26	1313057	+	NA	NA	NA	NA	NA	NA	T	Y	T	Y	T	Y	Y	T	T	Y	Y	T	Y	Y	T	T	T	Y	Y	T	Y	T	Y	Y	T	Y	T	Y	T	Y	T	T	T	T	T	Y	T	T	T
S26_1352787	A/G	26	1352787	+	NA	NA	NA	NA	NA	NA	A	R	A	R	A	R	R	A	A	R	R	A	R	R	A	A	A	R	R	A	R	A	R	R	A	R	A	R	A	R	A	A	A	A	A	R	A	A	A
S26_1364305	C/T	26	1364305	+	NA	NA	NA	NA	NA	NA	C	Y	C	Y	C	N	Y	C	C	Y	Y	C	Y	Y	N	C	C	C	Y	C	Y	C	Y	Y	C	Y	C	Y	C	C	C	C	C	C	C	Y	C	C	C
S26_1364458	A/G	26	1364458	+	NA	NA	NA	NA	NA	NA	A	R	A	R	A	R	R	A	N	R	A	A	R	A	N	N	A	N	G	A	R	A	R	R	A	R	A	N	N	A	A	A	N	A	A	R	A	A	A
S26_1400388	T/C	26	1400388	+	NA	NA	NA	NA	NA	NA	N	Y	T	Y	N	N	Y	T	T	T	T	T	C	Y	T	T	T	Y	C	T	C	T	Y	Y	T	N	T	Y	N	Y	T	T	T	T	T	Y	N	T	T
S26_1426430	T/A	26	1426430	+	NA	NA	NA	NA	NA	NA	N	W	T	W	T	A	A	T	T	A	W	T	N	W	N	N	T	A	A	T	W	T	W	W	T	W	T	N	N	T	T	T	T	T	T	W	T	T	T
S26_1440239	T/C	26	1440239	+	NA	NA	NA	NA	NA	NA	T	T	Y	T	T	T	T	T	T	T	T	T	T	T	T	T	T	T	T	T	T	T	T	T	T	T	T	T	T	T	T	T	T	N	T	T	T	T	T
S26_1444797	G/A	26	1444797	+	NA	NA	NA	NA	NA	NA	G	R	G	R	G	R	R	G	G	R	G	G	R	R	G	G	G	R	R	G	A	G	R	R	G	G	G	R	G	A	G	G	G	G	G	R	G	G	G
S26_1466155	T/C	26	1466155	+	NA	NA	NA	NA	NA	NA	T	Y	T	Y	T	T	Y	T	T	Y	Y	T	Y	Y	T	T	T	C	Y	T	Y	T	Y	Y	T	Y	T	Y	T	T	T	T	T	T	T	Y	T	T	T
S26_1528491	C/A	26	1528491	+	NA	NA	NA	NA	NA	NA	C	M	C	M	C	C	M	C	C	M	M	C	A	M	C	C	C	A	M	C	M	C	M	M	C	M	C	M	C	M	C	C	C	C	C	M	C	C	C
S26_1528596	T/C	26	1528596	+	NA	NA	NA	NA	NA	NA	T	Y	T	Y	T	Y	Y	T	T	Y	Y	T	Y	Y	T	T	T	Y	Y	T	Y	T	Y	C	T	Y	T	Y	N	Y	T	T	T	T	T	Y	T	T	T
S26_1531859	A/G	26	1531859	+	NA	NA	NA	NA	NA	NA	A	R	A	A	A	A	A	A	A	R	A	A	R	R	A	A	A	R	A	A	R	A	A	R	A	A	A	R	A	R	A	A	A	A	A	R	A	A	A
S26_1535038	C/T	26	1535038	+	NA	NA	NA	NA	NA	NA	C	C	C	C	C	N	C	C	C	C	Y	C	C	C	N	C	C	C	C	C	C	C	C	C	C	Y	C	C	C	C	C	C	C	C	C	C	C	C	C
S26_1656402	G/A	26	1656402	+	NA	NA	NA	NA	NA	NA	R	R	R	R	R	R	R	G	R	G	R	R	R	G	R	R	R	R	R	R	G	G	R	R	R	R	R	R	R	G	R	R	R	G	R	R	R	R	R
S26_1773615	C/G	26	1773615	+	NA	NA	NA	NA	NA	NA	C	C	C	C	C	C	C	C	C	C	C	C	C	C	C	C	C	C	C	C	C	C	C	C	C	C	C	C	C	C	C	C	C	C	C	C	C	C	C
S26_1869630	G/A	26	1869630	+	NA	NA	NA	NA	NA	NA	G	R	G	R	G	R	R	G	G	R	R	G	R	R	G	G	G	R	R	G	R	G	R	R	G	R	G	R	G	R	G	G	G	G	G	R	G	G	G
S26_1898591	A/T	26	1898591	+	NA	NA	NA	NA	NA	NA	A	W	A	W	N	A	W	A	A	W	W	A	A	T	A	N	A	W	W	A	A	A	W	W	A	T	A	A	A	T	A	A	A	A	A	T	A	A	A
S26_1898880	C/T	26	1898880	+	NA	NA	NA	NA	NA	NA	C	Y	C	Y	N	Y	Y	C	C	Y	Y	C	Y	Y	C	C	C	Y	Y	C	Y	C	Y	Y	C	Y	C	Y	C	Y	C	Y	C	C	C	Y	C	C	C
S26_1902359	A/C	26	1902359	+	NA	NA	NA	NA	NA	NA	A	M	A	M	A	A	M	A	A	C	M	A	M	A	A	A	A	M	M	A	M	A	M	M	A	M	A	A	A	C	A	A	A	A	A	M	A	A	A
S26_1907670	A/G	26	1907670	+	NA	NA	NA	NA	NA	NA	A	R	A	R	A	R	R	A	A	R	R	A	R	R	A	A	A	R	R	A	R	A	R	R	A	R	A	R	A	R	A	A	A	A	A	R	A	A	A
S26_1907781	A/G	26	1907781	+	NA	NA	NA	NA	NA	NA	A	R	A	R	A	G	R	A	A	A	R	A	R	R	A	A	A	R	R	A	R	A	R	A	A	R	A	R	A	N	A	A	A	A	A	R	A	A	A
S26_1971261	T/C	26	1971261	+	NA	NA	NA	NA	NA	NA	T	Y	T	Y	T	Y	Y	T	T	Y	Y	T	Y	Y	T	T	T	Y	T	T	Y	T	Y	Y	T	Y	T	Y	T	Y	T	T	T	T	T	Y	T	T	T
S26_1986163	A/G	26	1986163	+	NA	NA	NA	NA	NA	NA	A	R	A	R	A	A	R	A	A	R	A	A	A	R	A	A	A	A	R	A	A	A	R	A	A	R	A	R	A	N	A	A	A	A	A	R	A	A	A
S26_1986265	A/G	26	1986265	+	NA	NA	NA	NA	NA	NA	A	R	A	R	A	A	R	A	A	G	R	A	R	R	A	A	A	R	R	A	G	A	R	R	A	R	A	G	A	G	A	A	A	A	A	R	A	A	A
S26_2062773	G/A	26	2062773	+	NA	NA	NA	NA	NA	NA	G	R	G	R	G	A	R	G	G	R	R	G	R	R	G	G	G	R	R	G	R	G	R	R	G	R	G	R	G	R	G	G	G	G	G	R	G	G	G
S26_2071622	T/A	26	2071622	+	NA	NA	NA	NA	NA	NA	N	A	T	W	T	A	W	T	T	A	T	T	W	A	T	T	T	W	A	T	A	T	A	W	T	T	T	A	T	W	T	T	T	T	T	A	N	T	T
S26_2206887	A/C	26	2206887	+	NA	NA	NA	NA	NA	NA	A	M	A	M	A	M	M	A	A	M	A	A	M	M	A	A	A	C	A	A	M	A	M	M	A	A	A	M	A	M	A	A	A	A	A	A	A	A	A
S26_2208036	C/G	26	2208036	+	NA	NA	NA	NA	NA	NA	C	S	C	S	C	S	S	C	C	S	S	C	S	S	C	C	C	S	S	C	S	C	S	S	C	S	C	S	C	S	C	C	C	C	C	S	C	C	C
S26_2229375	C/T	26	2229375	+	NA	NA	NA	NA	NA	NA	C	C	C	C	C	C	C	C	C	C	Y	C	C	C	C	C	C	C	C	C	C	C	C	C	C	Y	C	C	C	C	C	C	C	C	C	C	C	C	C
S26_2230098	C/A	26	2230098	+	NA	NA	NA	NA	NA	NA	C	M	C	M	C	M	M	C	C	M	M	C	M	M	C	C	C	C	M	C	M	C	M	M	C	M	C	M	C	M	C	N	C	N	C	M	C	C	C
S26_2230248	T/C	26	2230248	+	NA	NA	NA	NA	NA	NA	T	Y	T	Y	T	N	C	T	T	Y	Y	T	Y	Y	N	T	T	C	Y	T	Y	T	Y	Y	T	Y	T	Y	T	C	T	T	T	T	T	Y	T	T	T
S26_2230360	G/A	26	2230360	+	NA	NA	NA	NA	NA	NA	G	R	G	R	N	R	G	G	G	G	G	G	A	A	N	G	G	G	R	G	R	G	R	G	G	G	G	R	G	R	G	G	G	G	G	R	G	G	G
S26_2275243	A/G	26	2275243	+	NA	NA	NA	NA	NA	NA	A	R	A	R	A	R	R	A	A	R	R	A	R	R	A	A	A	R	R	A	R	A	R	R	A	R	A	R	R	R	A	A	A	A	A	R	A	A	A
S26_2275634	C/T	26	2275634	+	NA	NA	NA	NA	NA	NA	C	Y	C	Y	C	Y	Y	C	C	Y	Y	C	Y	Y	C	C	C	Y	Y	C	Y	C	Y	Y	C	Y	C	Y	Y	Y	C	C	C	C	C	C	C	C	C
S26_2370296	A/C	26	2370296	+	NA	NA	NA	NA	NA	NA	A	A	A	A	A	A	A	A	A	A	A	A	A	A	A	A	A	M	A	A	A	A	A	A	A	A	A	A	A	M	A	A	A	A	A	A	A	A	A
S27_2785	A/T	27	2785	+	NA	NA	NA	NA	NA	NA	A	W	A	W	W	W	W	A	A	W	W	A	A	T	A	A	A	W	W	A	W	A	W	W	A	W	A	W	A	W	W	A	A	W	W	A	A	A	A
S27_2900	A/C	27	2900	+	NA	NA	NA	NA	NA	NA	A	M	A	M	M	N	M	A	A	A	M	A	M	M	N	A	A	C	N	A	M	A	M	M	A	M	A	M	N	M	M	A	A	M	M	A	A	A	A
S27_3324	C/T	27	3324	+	NA	NA	NA	NA	NA	NA	C	Y	C	Y	Y	C	Y	C	C	Y	Y	C	Y	Y	N	C	C	Y	Y	C	Y	C	Y	Y	C	Y	C	Y	C	Y	Y	C	C	Y	Y	C	C	C	C
S27_7502	A/G	27	7502	+	NA	NA	NA	NA	NA	NA	A	R	A	R	G	R	R	A	A	R	R	A	R	R	A	A	A	R	R	A	R	A	R	R	A	R	A	R	A	R	R	A	A	R	R	A	A	A	A
S27_15353	T/G	27	15353	+	NA	NA	NA	NA	NA	NA	T	K	T	K	N	K	K	T	T	K	K	T	K	T	T	T	T	K	G	T	G	T	K	T	T	K	T	K	T	N	K	T	T	G	K	T	T	T	T
S27_40265	G/T	27	40265	+	NA	NA	NA	NA	NA	NA	G	K	G	K	K	K	K	G	G	K	K	G	K	K	G	G	G	K	K	G	K	G	K	K	G	K	G	K	G	G	K	G	G	K	K	G	G	G	G
S27_43434	G/A	27	43434	+	NA	NA	NA	NA	NA	NA	G	R	G	R	R	R	R	G	G	R	R	G	R	R	G	G	G	R	R	G	R	G	R	R	G	R	G	R	G	R	R	G	G	R	R	G	G	G	G
S27_43651	A/G	27	43651	+	NA	NA	NA	NA	NA	NA	A	R	A	R	A	R	R	A	A	R	G	A	R	R	A	A	A	G	R	A	R	A	R	R	A	R	A	G	A	G	R	A	A	R	R	A	A	A	A
S27_45132	A/G	27	45132	+	NA	NA	NA	NA	NA	NA	A	R	A	A	A	N	R	A	A	A	R	A	A	R	N	A	A	N	R	A	R	A	R	R	A	R	A	G	A	N	R	A	A	N	A	A	A	A	A
S27_45561	C/T	27	45561	+	NA	NA	NA	NA	NA	NA	C	Y	C	C	N	C	Y	C	C	Y	Y	C	T	C	N	C	C	T	Y	C	Y	C	Y	C	C	Y	C	Y	C	C	Y	C	C	N	C	C	C	C	C
S27_45674	T/A	27	45674	+	NA	NA	NA	NA	NA	NA	N	W	T	W	N	T	T	T	T	W	W	T	W	N	N	T	T	T	A	T	W	T	W	W	T	W	T	W	T	N	W	T	T	T	W	T	T	T	T
S27_46599	T/C	27	46599	+	NA	NA	NA	NA	NA	NA	T	Y	T	Y	Y	Y	Y	T	T	Y	Y	T	Y	Y	T	T	T	Y	Y	T	Y	T	Y	Y	T	Y	T	Y	T	Y	Y	T	T	Y	Y	T	T	T	T
S27_48657	C/T	27	48657	+	NA	NA	NA	NA	NA	NA	C	Y	C	Y	C	C	Y	C	C	Y	C	C	Y	Y	C	C	C	Y	Y	C	Y	C	Y	C	C	C	C	Y	C	Y	Y	C	C	C	C	C	C	C	C
S27_49017	T/C	27	49017	+	NA	NA	NA	NA	NA	NA	T	Y	T	Y	Y	T	Y	T	T	Y	Y	T	Y	Y	T	T	T	T	Y	T	Y	T	Y	Y	T	Y	T	Y	T	Y	Y	T	T	Y	Y	T	T	T	T
S27_50063	T/C	27	50063	+	NA	NA	NA	NA	NA	NA	T	Y	T	Y	N	Y	Y	T	T	Y	Y	T	Y	T	N	T	T	Y	T	T	Y	T	Y	Y	T	Y	T	Y	T	Y	Y	T	T	Y	Y	T	T	T	T
S27_51099	T/A	27	51099	+	NA	NA	NA	NA	NA	NA	T	W	T	W	T	A	T	T	T	W	T	T	W	W	T	T	T	A	T	T	A	T	W	T	T	T	T	W	T	W	A	T	T	W	T	T	T	T	T
S27_52902	C/A	27	52902	+	NA	NA	NA	NA	NA	NA	C	M	C	M	M	N	M	C	C	M	M	C	C	C	C	C	C	M	M	C	M	C	M	A	C	M	C	M	C	M	M	C	C	M	M	C	C	C	C
S27_68162	G/T	27	68162	+	NA	NA	NA	NA	NA	NA	G	G	G	G	G	G	G	G	G	G	K	G	G	G	G	G	G	G	G	G	G	G	G	K	G	K	G	G	G	G	G	G	G	G	K	G	G	G	G
S27_92970	C/A	27	92970	+	NA	NA	NA	NA	NA	NA	C	M	C	M	M	M	M	C	C	M	M	C	M	M	C	C	C	M	M	C	M	C	M	M	C	M	C	M	C	M	M	C	C	M	M	C	C	C	C
S27_96056	T/A	27	96056	+	NA	NA	NA	NA	NA	NA	T	W	T	W	W	W	W	T	T	W	W	T	W	W	T	T	T	W	W	T	W	T	W	W	T	W	T	W	T	A	W	T	T	W	W	T	T	T	T
S27_99307	A/G	27	99307	+	NA	NA	NA	NA	NA	NA	A	R	A	R	R	R	R	A	A	R	R	A	R	R	A	A	A	G	R	A	R	A	R	R	A	R	A	R	A	R	R	A	A	R	R	A	A	A	A
S27_100229	A/T	27	100229	+	NA	NA	NA	NA	NA	NA	A	W	A	W	N	T	W	A	A	W	W	A	W	W	A	A	A	N	W	A	W	A	W	W	A	W	A	W	A	W	W	A	A	W	W	A	A	A	A
S27_105467	A/G	27	105467	+	NA	NA	NA	NA	NA	NA	A	R	N	R	N	N	R	A	A	N	R	A	G	R	A	A	A	R	G	A	R	A	R	G	A	R	A	A	A	N	R	A	A	A	A	A	A	A	A
S27_116913	A/T	27	116913	+	NA	NA	NA	NA	NA	NA	A	A	A	A	W	A	W	A	A	W	W	A	A	W	A	A	A	A	W	A	A	A	W	W	A	W	W	W	A	A	A	W	W	W	W	W	W	W	A
S27_124337	T/G	27	124337	+	NA	NA	NA	NA	NA	NA	T	T	T	T	K	T	T	T	T	T	K	T	T	T	T	T	T	T	T	T	T	T	T	K	T	K	T	T	T	T	T	T	T	T	K	T	T	T	T
S27_134916	A/G	27	134916	+	NA	NA	NA	NA	NA	NA	A	R	A	R	N	A	N	A	A	R	A	A	R	A	N	A	A	A	A	A	R	A	R	A	A	A	A	A	A	A	G	A	A	R	A	A	A	A	A
S27_147830	A/G	27	147830	+	NA	NA	NA	NA	NA	NA	A	R	A	R	R	A	R	A	A	R	R	A	R	R	A	A	A	R	R	A	R	A	R	R	A	R	A	R	A	R	R	A	A	R	R	A	A	A	A
S27_176002	A/T	27	176002	+	NA	NA	NA	NA	NA	NA	A	W	A	W	W	A	W	A	A	W	W	A	W	W	A	A	A	W	W	A	W	A	W	W	A	W	A	W	A	W	W	A	A	W	W	A	A	A	A
S27_180169	A/C	27	180169	+	NA	NA	NA	NA	NA	NA	A	M	A	M	M	M	M	A	A	M	M	A	M	M	A	A	A	M	M	A	M	A	M	M	A	M	A	M	A	M	M	A	A	M	M	A	A	A	A
S27_186123	A/G	27	186123	+	NA	NA	NA	NA	NA	NA	A	R	A	R	A	A	R	A	A	R	A	A	R	R	A	A	A	R	R	A	R	A	R	A	A	A	A	R	A	R	R	A	A	R	A	A	A	A	A
S27_199972	C/A	27	199972	+	NA	NA	NA	NA	NA	NA	C	M	N	M	M	A	M	C	C	A	A	C	A	M	N	C	C	M	A	C	C	C	M	M	C	M	C	A	N	M	M	C	C	A	M	C	C	C	C
S27_200089	G/A	27	200089	+	NA	NA	NA	NA	NA	NA	G	R	G	R	G	R	R	G	G	R	G	G	R	R	G	G	G	R	R	G	R	G	R	G	G	G	G	R	G	R	R	G	G	R	G	G	G	G	G
S27_211922	T/G	27	211922	+	NA	NA	NA	NA	NA	NA	T	K	T	G	T	K	K	T	T	N	T	T	N	K	N	T	T	K	K	T	K	T	K	T	T	T	T	K	N	K	K	T	T	K	T	T	T	T	T
S27_223912	G/A	27	223912	+	NA	NA	NA	NA	NA	NA	G	R	G	R	N	A	R	G	G	R	R	G	R	R	N	G	G	A	R	G	A	G	R	G	G	R	G	R	G	G	R	G	G	A	A	G	G	G	G
S27_229225	C/T	27	229225	+	NA	NA	NA	NA	NA	NA	C	Y	C	Y	T	C	Y	C	C	Y	Y	C	Y	T	N	C	C	C	Y	C	Y	C	Y	Y	C	Y	C	Y	C	Y	Y	C	C	C	Y	C	C	C	C
S27_243658	T/C	27	243658	+	NA	NA	NA	NA	NA	NA	T	Y	T	Y	Y	C	Y	T	T	Y	Y	T	Y	Y	T	T	T	T	Y	T	Y	T	Y	Y	T	Y	T	Y	T	C	Y	T	T	T	Y	T	T	T	T
S27_243778	C/T	27	243778	+	NA	NA	NA	NA	NA	NA	N	C	C	C	Y	C	C	C	C	C	Y	C	C	C	N	C	C	C	C	C	C	C	C	Y	C	Y	C	C	C	C	C	C	C	C	Y	C	C	C	C
S27_262893	T/C	27	262893	+	NA	NA	NA	NA	NA	NA	T	Y	T	Y	N	N	T	T	T	N	Y	N	T	T	T	T	T	C	Y	T	Y	T	Y	Y	T	Y	T	T	T	Y	Y	T	T	N	T	T	T	T	T
S27_270074	A/G	27	270074	+	NA	NA	NA	NA	NA	NA	A	R	A	R	A	R	R	A	A	R	A	A	R	R	A	A	A	R	R	A	R	A	R	A	A	A	A	R	A	R	R	A	A	A	A	A	A	A	A
S27_270187	C/T	27	270187	+	NA	NA	NA	NA	NA	NA	N	Y	C	Y	C	N	Y	C	C	T	C	N	Y	Y	N	C	C	T	T	C	C	C	Y	C	C	C	C	Y	C	Y	N	N	C	C	C	C	C	C	C
S27_271929	A/G	27	271929	+	NA	NA	NA	NA	NA	NA	A	R	A	R	R	G	R	A	A	R	R	A	R	R	A	A	A	R	R	A	R	A	R	R	A	R	A	R	A	R	R	A	A	A	R	A	A	A	A
S27_317086	G/A	27	317086	+	NA	NA	NA	NA	NA	NA	G	R	G	R	R	R	R	G	G	R	R	G	R	R	G	G	G	R	R	G	R	G	R	R	G	R	G	R	G	R	R	G	G	G	R	G	G	G	G
S27_323286	T/C	27	323286	+	NA	NA	NA	NA	NA	NA	T	Y	T	Y	Y	T	Y	T	T	Y	Y	T	Y	Y	N	T	T	T	Y	T	Y	T	Y	Y	T	Y	T	Y	T	Y	Y	T	T	T	Y	T	T	T	T
S27_327813	T/C	27	327813	+	NA	NA	NA	NA	NA	NA	T	T	T	T	Y	T	T	T	T	T	Y	T	T	T	T	T	T	T	T	T	T	T	T	Y	T	Y	T	T	T	T	T	T	T	T	Y	T	T	T	T
S27_331971	A/T	27	331971	+	NA	NA	NA	NA	NA	NA	A	W	A	W	W	W	W	A	A	W	W	A	W	W	N	A	A	W	W	A	W	A	W	W	A	W	A	W	A	W	W	A	A	A	W	A	A	A	A
S27_334798	A/G	27	334798	+	NA	NA	NA	NA	NA	NA	A	A	A	A	N	G	A	A	A	A	A	A	A	R	A	A	A	R	A	A	A	A	A	A	A	A	A	A	A	A	A	A	A	A	A	A	A	A	A
S27_336051	T/C	27	336051	+	NA	NA	NA	NA	NA	NA	T	Y	T	Y	Y	Y	Y	T	T	Y	Y	T	Y	Y	N	T	T	Y	Y	T	Y	T	Y	Y	T	Y	T	Y	T	Y	Y	T	T	T	Y	T	T	T	T
S27_353901	G/A	27	353901	+	NA	NA	NA	NA	NA	NA	G	R	G	R	R	R	R	G	G	R	R	G	R	R	G	G	G	R	R	G	R	G	R	R	G	R	G	R	G	R	R	G	G	G	R	G	G	G	G
S27_395910	C/A	27	395910	+	NA	NA	NA	NA	NA	NA	C	M	C	M	M	M	M	C	C	M	M	C	M	M	C	C	C	M	M	C	M	C	M	M	C	M	C	M	C	M	M	C	C	C	M	C	C	C	C
S27_397695	A/G	27	397695	+	NA	NA	NA	NA	NA	NA	A	R	A	R	G	A	A	A	A	R	R	A	A	R	A	A	A	R	G	A	G	A	R	R	A	R	A	A	A	R	R	A	A	A	G	A	A	A	A
S27_409017	C/A	27	409017	+	NA	NA	NA	NA	NA	NA	C	M	M	M	M	M	M	C	C	M	M	C	M	M	C	C	C	M	M	C	M	C	M	M	C	M	C	M	C	M	M	C	C	C	M	C	C	C	C
S27_420227	G/T	27	420227	+	NA	NA	NA	NA	NA	NA	G	K	G	K	K	G	K	G	G	K	K	G	K	K	N	G	G	K	K	G	K	G	K	K	G	K	G	K	G	K	K	G	G	G	K	G	G	G	G
S27_426077	C/A	27	426077	+	NA	NA	NA	NA	NA	NA	C	M	C	M	N	N	M	C	C	M	M	C	M	M	C	C	C	A	C	C	C	C	M	M	C	C	C	C	N	C	M	C	C	N	A	C	C	C	C
S27_427022	C/T	27	427022	+	NA	NA	NA	NA	NA	NA	C	Y	C	Y	Y	Y	Y	C	C	Y	Y	C	Y	Y	C	C	C	Y	Y	C	Y	C	Y	Y	C	Y	C	C	C	Y	Y	C	C	C	Y	C	C	C	C
S27_445297	C/G	27	445297	+	NA	NA	NA	NA	NA	NA	C	S	C	S	S	S	S	C	C	S	S	C	S	S	C	C	C	S	S	C	S	C	S	S	C	S	C	S	C	S	S	C	C	C	S	C	C	C	C
S27_450828	T/C	27	450828	+	NA	NA	NA	NA	NA	NA	T	Y	T	Y	Y	Y	Y	T	T	Y	Y	T	Y	Y	T	T	T	Y	Y	T	Y	T	Y	Y	T	Y	T	Y	T	C	Y	T	T	T	Y	T	T	T	T
S27_469691	G/C	27	469691	+	NA	NA	NA	NA	NA	NA	G	S	G	S	S	S	S	G	G	S	S	G	S	S	G	G	G	S	S	G	S	G	S	S	G	S	G	S	G	S	S	G	G	G	S	G	G	G	G
S27_469804	G/T	27	469804	+	NA	NA	NA	NA	NA	NA	G	K	G	K	K	G	K	G	G	K	K	G	K	K	G	G	G	K	G	G	K	G	K	K	G	K	G	K	G	K	K	G	G	G	K	G	G	G	G
S27_483874	T/C	27	483874	+	NA	NA	NA	NA	NA	NA	T	T	T	T	T	T	T	T	T	T	T	T	T	T	T	T	T	T	T	T	T	T	T	T	T	T	T	T	T	T	T	T	T	T	T	T	T	T	T
S27_494430	T/C	27	494430	+	NA	NA	NA	NA	NA	NA	T	Y	T	Y	T	T	Y	T	T	Y	T	T	Y	T	N	T	T	Y	Y	T	Y	T	Y	T	T	T	T	Y	T	T	T	T	T	T	T	T	T	T	T
S27_528890	G/A	27	528890	+	NA	NA	NA	NA	NA	NA	G	R	G	R	G	R	R	G	G	R	G	G	R	R	G	G	G	R	R	G	R	G	R	G	G	G	G	R	G	R	R	G	G	G	G	G	G	G	G
S27_594912	T/G	27	594912	+	NA	NA	NA	NA	NA	NA	T	K	T	K	K	G	K	T	T	K	T	T	K	K	N	T	T	K	K	T	K	T	K	K	T	T	T	K	N	T	K	T	T	T	T	T	T	T	T
S27_595021	G/A	27	595021	+	NA	NA	NA	NA	NA	NA	G	R	G	R	G	N	R	G	G	R	G	G	A	R	G	G	G	R	A	G	A	G	R	R	G	G	G	G	G	R	R	G	G	G	G	G	G	G	G
S27_595138	A/C	27	595138	+	NA	NA	NA	NA	NA	NA	A	M	A	M	M	C	M	A	A	M	N	N	M	M	A	A	A	C	C	A	M	A	M	M	A	N	A	M	A	M	M	A	A	A	A	A	A	A	A
S27_601577	A/C	27	601577	+	NA	NA	NA	NA	NA	NA	N	A	A	A	N	N	A	A	A	A	M	A	A	A	N	A	A	A	A	A	A	A	A	A	A	C	A	A	A	A	A	A	A	A	M	A	A	A	A
S27_610522	G/T	27	610522	+	NA	NA	NA	NA	NA	NA	G	K	G	K	K	K	K	G	G	K	K	G	K	K	G	G	G	K	K	G	K	G	K	K	G	K	G	K	G	K	K	G	G	G	K	G	G	G	G
S27_618631	T/C	27	618631	+	NA	NA	NA	NA	NA	NA	T	T	T	T	N	N	T	T	T	N	C	T	T	T	N	T	T	T	T	T	T	T	T	T	T	Y	T	T	T	T	N	T	T	T	Y	T	T	T	T
S27_627865	C/T	27	627865	+	NA	NA	NA	NA	NA	NA	C	Y	C	Y	Y	Y	Y	C	C	Y	Y	C	Y	Y	C	C	C	Y	Y	C	Y	C	Y	Y	C	Y	C	Y	C	Y	Y	C	C	C	Y	C	C	C	C
S27_630581	G/A	27	630581	+	NA	NA	NA	NA	NA	NA	G	A	N	R	G	N	R	G	G	A	G	G	R	R	G	G	G	G	G	G	A	G	R	R	G	G	G	A	N	R	R	G	G	G	G	G	G	G	G
S27_643122	G/T	27	643122	+	NA	NA	NA	NA	NA	NA	G	K	G	K	K	K	K	G	G	K	K	G	K	K	G	G	G	K	K	G	K	G	K	K	G	K	G	K	G	K	K	G	G	G	K	G	G	G	G
S27_657041	C/T	27	657041	+	NA	NA	NA	NA	NA	NA	N	Y	C	Y	Y	N	T	C	C	Y	Y	C	C	T	C	C	C	N	T	C	T	C	Y	C	C	Y	C	T	N	C	Y	C	C	C	Y	C	C	C	C
S27_659468	T/C	27	659468	+	NA	NA	NA	NA	NA	NA	T	Y	T	Y	Y	Y	Y	T	T	Y	Y	T	Y	Y	T	T	T	Y	Y	T	Y	T	Y	Y	T	Y	T	Y	Y	Y	Y	T	T	T	Y	T	T	T	T
S27_671672	C/T	27	671672	+	NA	NA	NA	NA	NA	NA	C	Y	C	Y	Y	Y	Y	C	C	Y	Y	C	Y	Y	C	C	C	Y	Y	C	Y	C	Y	Y	C	Y	C	Y	C	Y	Y	C	C	C	Y	C	C	C	C
S27_682602	T/C	27	682602	+	NA	NA	NA	NA	NA	NA	T	Y	T	Y	T	C	Y	T	T	C	Y	N	T	T	N	N	T	T	C	T	N	T	Y	T	T	Y	T	Y	T	C	Y	N	T	T	T	T	T	T	T
S27_684395	G/A	27	684395	+	NA	NA	NA	NA	NA	NA	G	R	G	R	G	N	R	G	G	R	R	G	R	R	G	G	G	N	R	G	G	G	R	R	G	R	G	R	G	R	R	G	G	G	R	G	G	G	G
S27_685472	G/A	27	685472	+	NA	NA	NA	NA	NA	NA	G	R	G	R	N	A	A	G	N	R	R	G	R	A	N	G	G	A	R	G	A	G	R	R	G	A	G	A	N	A	A	G	G	G	R	G	G	N	G
S27_685638	T/C	27	685638	+	NA	NA	NA	NA	NA	NA	T	T	C	T	T	T	T	T	T	N	T	T	N	T	T	T	T	T	T	T	T	T	T	T	T	T	T	N	T	T	T	T	T	T	T	T	T	T	T
S27_687598	T/G	27	687598	+	NA	NA	NA	NA	NA	NA	T	K	T	K	T	T	G	T	T	T	K	T	G	K	T	T	T	K	K	T	T	T	K	K	T	T	T	K	T	K	K	T	T	T	K	T	T	T	T
S27_689300	A/G	27	689300	+	NA	NA	NA	NA	NA	NA	A	A	R	A	A	A	A	A	A	A	A	A	A	A	A	A	A	A	A	A	A	A	A	A	A	A	A	A	A	A	A	A	A	A	A	A	A	A	A
S27_728164	A/T	27	728164	+	NA	NA	NA	NA	NA	NA	A	W	A	W	A	W	W	A	A	W	W	A	W	W	N	A	A	W	W	A	W	A	W	W	A	W	A	W	A	W	W	A	A	A	W	A	A	A	A
S27_740458	T/C	27	740458	+	NA	NA	NA	NA	NA	NA	T	Y	T	Y	T	Y	Y	T	T	Y	Y	T	Y	Y	T	T	T	Y	Y	T	Y	T	Y	Y	T	Y	T	Y	T	Y	Y	T	T	T	Y	T	T	T	T
S27_744170	C/A	27	744170	+	NA	NA	NA	NA	NA	NA	C	C	C	C	C	C	M	C	C	C	C	C	C	C	C	C	C	C	C	C	C	C	C	C	C	C	C	C	C	C	C	C	C	C	C	C	C	C	C
S27_746368	G/A	27	746368	+	NA	NA	NA	NA	NA	NA	G	G	G	G	G	G	G	G	G	G	R	G	G	G	G	G	G	G	G	G	G	G	G	G	G	R	G	G	G	G	G	G	G	G	R	G	G	G	G
S27_796564	A/C	27	796564	+	NA	NA	NA	NA	NA	NA	A	M	A	M	A	M	M	A	A	M	M	A	M	M	A	A	A	M	M	A	M	A	M	M	A	M	A	M	A	M	M	A	A	A	M	A	A	A	A
S27_806764	T/C	27	806764	+	NA	NA	NA	NA	NA	NA	N	C	T	Y	T	C	C	T	T	C	C	T	C	C	N	T	T	Y	C	T	C	T	C	C	T	C	T	C	T	C	C	T	N	T	C	N	T	T	T
S27_809311	C/A	27	809311	+	NA	NA	NA	NA	NA	NA	C	M	C	M	C	M	M	C	C	M	M	C	M	M	C	C	C	C	M	C	C	C	M	M	C	M	C	M	C	M	M	C	C	C	M	C	C	C	C
S27_815490	C/T	27	815490	+	NA	NA	NA	NA	NA	NA	C	Y	C	Y	C	Y	Y	C	C	Y	Y	C	Y	Y	C	C	C	Y	Y	C	Y	C	Y	Y	C	Y	C	Y	C	Y	Y	C	C	C	Y	C	C	C	C
S27_823775	C/T	27	823775	+	NA	NA	NA	NA	NA	NA	C	Y	C	Y	N	N	T	C	C	T	Y	C	Y	Y	N	C	C	T	Y	C	C	C	Y	Y	C	Y	C	T	C	Y	Y	C	C	C	C	C	C	C	C
S27_823894	C/T	27	823894	+	NA	NA	NA	NA	NA	NA	N	Y	C	Y	N	N	Y	C	C	C	Y	C	C	T	C	C	C	Y	Y	C	C	C	Y	C	C	Y	C	T	C	T	Y	C	N	C	T	C	C	C	C
S27_842509	G/A	27	842509	+	NA	NA	NA	NA	NA	NA	G	G	G	G	G	G	G	G	G	G	R	G	G	G	G	G	G	G	G	G	G	G	G	G	G	R	G	G	G	G	G	G	G	G	R	G	G	G	G
S27_842614	A/T	27	842614	+	NA	NA	NA	NA	NA	NA	A	W	A	W	A	W	W	A	A	T	W	N	W	W	N	A	A	W	W	A	W	A	W	W	A	W	A	A	A	A	T	A	A	A	W	A	A	A	A
S27_845911	T/A	27	845911	+	NA	NA	NA	NA	NA	NA	T	W	T	W	T	W	W	T	T	W	W	T	W	W	N	T	T	W	W	T	W	T	W	W	T	W	T	W	T	W	W	T	T	T	W	T	T	T	T
S27_848607	C/G	27	848607	+	NA	NA	NA	NA	NA	NA	C	S	C	S	N	N	S	C	C	S	S	C	S	C	N	C	C	S	G	C	S	C	S	S	C	S	C	S	C	C	S	C	C	C	S	C	C	C	C
S27_848732	G/T	27	848732	+	NA	NA	NA	NA	NA	NA	G	K	G	K	G	N	K	G	G	K	K	G	K	K	N	G	G	G	K	G	K	G	K	K	G	K	G	K	G	G	K	G	G	G	N	G	G	G	G
S27_848888	T/A	27	848888	+	NA	NA	NA	NA	NA	NA	T	W	T	W	T	N	W	T	T	W	W	T	A	W	T	T	T	W	N	T	W	T	A	W	T	W	T	W	T	A	W	T	T	T	W	T	T	N	T
S27_849377	C/T	27	849377	+	NA	NA	NA	NA	NA	NA	N	Y	C	Y	N	N	N	C	N	C	Y	N	Y	T	N	C	C	Y	Y	C	Y	C	Y	Y	C	Y	C	C	N	N	T	C	C	C	Y	C	C	C	C
S27_850151	A/G	27	850151	+	NA	NA	NA	NA	NA	NA	N	R	A	R	N	R	R	A	A	G	R	A	R	R	N	A	A	R	R	A	G	A	R	R	A	R	A	R	A	R	R	A	A	A	R	A	A	A	A
S27_850279	G/A	27	850279	+	NA	NA	NA	NA	NA	NA	N	R	G	R	G	G	R	G	G	G	R	G	A	R	G	G	G	R	A	G	R	G	A	R	G	R	G	A	G	A	G	G	G	G	R	G	G	G	G
S27_850952	A/G	27	850952	+	NA	NA	NA	NA	NA	NA	A	R	A	R	A	R	R	A	A	R	R	A	R	R	A	A	A	R	R	A	R	A	R	R	A	R	A	R	A	R	R	A	A	A	R	A	A	A	A
S27_860289	T/G	27	860289	+	NA	NA	NA	NA	NA	NA	T	K	T	K	T	K	K	T	T	K	K	T	K	K	T	T	T	K	K	T	K	T	K	K	T	K	T	K	T	K	K	T	T	T	K	T	T	T	T
S27_865276	A	27	865276	+	NA	NA	NA	NA	NA	NA	A	A	A	A	A	A	A	A	A	A	A	A	A	A	A	A	A	A	A	A	A	A	A	A	A	A	A	A	A	A	A	A	A	A	A	A	A	A	A
S27_865433	T/C	27	865433	+	NA	NA	NA	NA	NA	NA	T	Y	T	Y	T	Y	Y	T	T	Y	Y	T	Y	Y	T	T	T	Y	Y	T	Y	T	Y	Y	T	Y	T	Y	T	Y	Y	T	T	T	Y	T	T	T	T
S27_894064	G/T	27	894064	+	NA	NA	NA	NA	NA	NA	G	K	G	K	G	N	K	G	G	K	K	G	K	K	G	G	G	K	K	G	K	G	K	K	G	K	G	K	G	K	K	G	G	G	K	G	G	G	G
S27_897502	G/A	27	897502	+	NA	NA	NA	NA	NA	NA	G	R	G	R	G	R	R	G	G	R	R	G	R	R	G	G	G	G	R	G	R	G	R	R	G	R	G	R	G	R	R	G	G	G	R	G	G	G	G
S27_917620	T/A	27	917620	+	NA	NA	NA	NA	NA	NA	T	T	T	T	T	T	T	T	T	T	W	T	T	T	N	T	T	T	T	T	T	T	T	T	T	W	T	T	T	T	T	T	T	T	W	T	T	W	T
S27_920369	G/T	27	920369	+	NA	NA	NA	NA	NA	NA	G	K	G	K	G	K	K	G	G	K	K	G	K	K	G	G	G	K	K	G	K	G	K	K	G	K	G	K	G	K	K	G	G	G	K	G	G	G	G
S27_955874	C/T	27	955874	+	NA	NA	NA	NA	NA	NA	C	Y	C	Y	N	N	C	C	C	Y	Y	C	Y	Y	N	N	C	Y	Y	C	Y	C	Y	Y	C	Y	C	Y	C	T	Y	C	C	N	Y	C	C	C	C
S27_972465	T/G	27	972465	+	NA	NA	NA	NA	NA	NA	T	K	T	K	T	G	K	T	T	K	K	T	K	T	T	T	T	G	K	T	T	T	K	K	T	K	T	K	T	K	K	T	T	T	K	T	T	T	T
S27_974440	C/T	27	974440	+	NA	NA	NA	NA	NA	NA	C	C	C	C	C	C	C	C	C	C	Y	C	C	C	C	C	C	C	C	C	C	C	C	C	C	Y	C	C	C	C	C	C	C	C	Y	C	C	C	C
S27_982109	A/G	27	982109	+	NA	NA	NA	NA	NA	NA	A	R	A	R	A	R	R	A	A	R	R	A	R	R	A	A	A	R	R	A	R	A	R	R	A	R	A	R	A	R	R	A	A	A	R	A	A	A	A
S27_982919	G/C	27	982919	+	NA	NA	NA	NA	NA	NA	G	S	G	S	G	S	S	G	G	S	S	G	S	S	G	G	G	S	S	G	S	G	S	S	G	S	G	S	G	S	S	G	G	G	S	G	G	G	G
S27_983036	G/A	27	983036	+	NA	NA	NA	NA	NA	NA	G	R	G	R	G	R	R	G	G	R	R	G	R	R	G	G	G	R	R	G	R	G	R	R	G	R	G	R	G	R	R	G	G	G	R	G	G	G	G
S27_983178	G/T	27	983178	+	NA	NA	NA	NA	NA	NA	G	K	G	K	G	K	K	G	G	G	K	N	K	K	N	G	G	G	K	G	G	G	K	K	G	K	G	K	G	G	G	G	G	N	K	G	G	G	G
S27_986103	A/T	27	986103	+	NA	NA	NA	NA	NA	NA	A	W	A	W	A	W	W	A	A	W	W	A	W	W	A	A	A	W	W	A	W	A	W	W	A	W	A	W	A	W	W	A	A	A	W	A	A	A	A
S27_987085	T/A	27	987085	+	NA	NA	NA	NA	NA	NA	T	W	T	W	N	N	W	T	T	W	W	T	W	W	N	T	T	W	W	T	W	T	W	W	T	W	T	W	T	A	T	T	T	T	W	T	T	T	T
S27_995023	T/C	27	995023	+	NA	NA	NA	NA	NA	NA	T	Y	T	Y	T	Y	Y	T	T	Y	Y	T	Y	Y	T	T	T	Y	Y	T	Y	T	Y	Y	T	Y	T	Y	T	Y	Y	T	T	T	Y	T	T	T	T
S27_998822	T/C	27	998822	+	NA	NA	NA	NA	NA	NA	T	Y	T	Y	T	Y	Y	T	T	Y	T	T	Y	Y	T	T	T	Y	Y	T	Y	T	Y	Y	T	T	T	Y	T	T	Y	T	T	T	T	T	T	T	T
S27_1015064	T/A	27	1015064	+	NA	NA	NA	NA	NA	NA	T	W	T	A	T	A	W	T	T	W	W	N	A	A	N	N	T	A	A	T	W	T	W	W	T	W	T	W	T	A	W	T	T	T	W	T	T	N	T
S27_1017433	G/C	27	1017433	+	NA	NA	NA	NA	NA	NA	G	S	G	S	G	S	S	G	G	S	S	G	S	C	N	N	G	C	C	G	G	G	S	S	G	S	G	S	G	N	S	G	G	N	S	G	G	G	G
S27_1022575	A/T	27	1022575	+	NA	NA	NA	NA	NA	NA	A	W	A	W	A	T	W	A	A	W	W	A	W	W	A	A	A	W	W	A	W	A	W	W	A	W	A	W	A	W	W	A	A	A	W	A	A	A	A
S27_1022731	C/G	27	1022731	+	NA	NA	NA	NA	NA	NA	C	S	C	S	C	S	S	C	C	S	S	C	S	S	C	C	C	S	S	C	S	C	S	S	C	S	C	S	C	S	S	C	C	C	S	C	C	C	C
S27_1023817	G/A	27	1023817	+	NA	NA	NA	NA	NA	NA	G	G	G	R	G	G	G	G	G	G	G	G	G	G	G	G	G	G	G	G	G	G	G	G	G	G	G	G	G	R	R	G	G	G	G	G	G	G	G
S27_1033895	A/G	27	1033895	+	NA	NA	NA	NA	NA	NA	A	A	A	R	A	G	A	A	A	R	R	A	R	A	N	A	A	A	A	A	A	A	R	R	A	R	A	A	A	A	R	A	A	A	R	A	A	A	A
S27_1038124	T/C	27	1038124	+	NA	NA	NA	NA	NA	NA	T	Y	T	Y	T	Y	Y	T	T	Y	Y	T	Y	Y	T	T	T	Y	Y	T	Y	T	Y	Y	T	Y	T	Y	T	Y	Y	T	T	T	Y	T	T	T	T
S27_1047257	T/C	27	1047257	+	NA	NA	NA	NA	NA	NA	T	Y	T	Y	T	T	T	T	T	Y	T	T	Y	T	T	T	T	T	T	T	T	T	Y	Y	T	T	T	T	T	T	T	T	T	T	T	T	T	T	T
S27_1074592	T/G	27	1074592	+	NA	NA	NA	NA	NA	NA	T	K	T	K	T	K	K	T	T	K	K	T	K	K	T	T	T	K	K	T	K	T	K	K	T	K	T	K	T	K	K	T	T	T	K	T	T	T	T
S27_1075108	C/T	27	1075108	+	NA	NA	NA	NA	NA	NA	C	Y	C	Y	C	Y	Y	C	C	Y	Y	C	Y	Y	C	C	C	Y	Y	C	Y	C	Y	Y	C	Y	C	Y	C	Y	Y	C	C	C	Y	C	C	C	C
S27_1089769	T/C	27	1089769	+	NA	NA	NA	NA	NA	NA	T	Y	T	Y	N	C	C	T	T	Y	Y	T	Y	Y	N	T	T	T	N	T	C	T	Y	Y	T	Y	T	Y	T	Y	Y	T	T	N	T	T	T	N	T
S27_1089948	T/A	27	1089948	+	NA	NA	NA	NA	NA	NA	T	W	T	W	T	A	W	T	T	N	T	T	T	W	T	T	T	W	N	T	W	T	W	W	T	T	T	A	N	N	W	T	T	N	T	T	T	T	T
S27_1091583	A/C	27	1091583	+	NA	NA	NA	NA	NA	NA	A	M	A	M	A	M	M	A	A	M	A	A	M	C	A	A	A	M	M	A	M	A	M	M	A	A	A	M	A	M	M	A	A	A	A	A	A	A	A
S27_1114182	T/A	27	1114182	+	NA	NA	NA	NA	NA	NA	T	W	T	W	T	W	W	T	T	W	W	T	W	W	T	T	T	W	W	T	W	T	W	W	T	W	T	W	T	W	W	T	T	T	W	T	T	T	T
S27_1117439	T/C	27	1117439	+	NA	NA	NA	NA	NA	NA	T	Y	T	Y	T	C	Y	T	T	Y	T	T	Y	Y	N	T	T	Y	Y	T	Y	T	Y	Y	T	T	T	Y	T	Y	Y	T	T	T	T	T	T	T	T
S27_1117547	T/G	27	1117547	+	NA	NA	NA	NA	NA	NA	T	K	T	K	T	K	K	T	T	K	K	T	K	K	T	T	T	K	K	T	T	T	K	K	T	K	T	K	T	K	K	T	T	T	K	T	T	T	T
S27_1126943	G/A	27	1126943	+	NA	NA	NA	NA	NA	NA	G	G	G	R	G	A	R	G	G	G	R	G	R	G	N	G	G	R	R	G	R	G	R	R	G	G	G	R	G	R	R	G	G	G	R	G	G	G	G
S27_1127083	G/A	27	1127083	+	NA	NA	NA	NA	NA	NA	G	G	G	R	G	G	G	G	G	R	G	G	R	R	G	G	G	R	G	G	G	G	R	G	G	G	G	R	G	G	G	G	G	G	R	G	G	G	G
S27_1155487	A/T	27	1155487	+	NA	NA	NA	NA	NA	NA	A	W	A	W	A	T	W	A	A	W	W	A	W	W	A	A	A	A	A	A	W	A	W	A	A	W	A	W	A	W	W	A	A	A	W	A	A	A	A
S27_1155610	A/G	27	1155610	+	NA	NA	NA	NA	NA	NA	A	R	A	R	A	R	A	A	A	R	R	A	R	R	A	A	A	R	R	A	R	A	R	R	A	R	A	R	A	G	A	A	A	A	R	A	A	A	A
S27_1157400	T/C	27	1157400	+	NA	NA	NA	NA	NA	NA	T	Y	T	Y	T	Y	Y	T	T	Y	Y	T	Y	Y	T	T	T	Y	T	T	Y	T	Y	Y	T	Y	T	Y	T	Y	Y	T	T	T	Y	T	T	T	T
S27_1157515	A/G	27	1157515	+	NA	NA	NA	NA	NA	NA	N	R	A	R	N	N	R	N	A	G	R	A	R	G	N	A	A	R	R	A	R	A	R	A	A	R	A	N	A	G	A	A	A	A	R	A	A	A	A
S27_1158946	A/C	27	1158946	+	NA	NA	NA	NA	NA	NA	A	M	A	M	A	M	M	A	A	M	M	A	M	M	A	A	A	M	M	A	M	A	M	M	A	M	A	M	A	M	M	A	A	A	M	A	A	A	A
S27_1159110	A/T	27	1159110	+	NA	NA	NA	NA	NA	NA	A	W	A	W	N	N	W	A	A	W	W	A	W	W	A	A	A	W	W	A	A	A	W	W	A	W	A	W	A	A	W	A	A	A	W	A	A	A	A
S27_1169718	G/A	27	1169718	+	NA	NA	NA	NA	NA	NA	G	R	G	R	G	R	R	G	G	R	R	G	R	R	G	G	G	R	R	G	R	G	R	R	G	R	G	R	G	R	R	G	G	G	R	G	G	G	G
S27_1200110	C/T	27	1200110	+	NA	NA	NA	NA	NA	NA	C	Y	C	Y	C	Y	Y	C	C	Y	Y	C	Y	Y	C	C	C	Y	Y	C	Y	C	Y	Y	C	Y	C	Y	C	Y	Y	C	C	C	Y	C	C	C	C
S27_1226646	A/G	27	1226646	+	NA	NA	NA	NA	NA	NA	A	R	A	R	A	R	R	A	A	R	R	A	R	R	A	A	A	R	R	A	R	A	R	R	A	R	A	R	A	R	R	A	A	A	R	A	A	A	A
S27_1251722	A/G	27	1251722	+	NA	NA	NA	NA	NA	NA	A	R	A	R	A	G	G	A	A	G	R	A	R	R	N	A	A	R	G	A	R	A	R	R	A	G	A	R	A	R	R	A	A	A	R	A	A	A	A
S27_1264335	G/A	27	1264335	+	NA	NA	NA	NA	NA	NA	G	G	G	G	G	N	G	G	G	G	R	G	G	G	N	G	G	N	G	G	G	G	G	G	G	A	G	G	G	G	G	G	G	G	R	G	G	G	G
S27_1274362	T/G	27	1274362	+	NA	NA	NA	NA	NA	NA	T	K	T	K	T	T	K	T	T	K	K	T	K	T	T	T	T	G	K	T	K	T	K	K	T	K	T	K	T	T	K	T	T	T	K	T	T	T	T
S27_1274500	A/G	27	1274500	+	NA	NA	NA	NA	NA	NA	A	A	A	A	A	A	A	A	A	A	R	A	A	A	A	A	A	A	A	A	A	A	A	A	A	R	A	A	A	A	A	A	A	A	R	A	A	A	A
S27_1276307	A/T	27	1276307	+	NA	NA	NA	NA	NA	NA	N	A	A	A	A	A	A	A	A	N	W	A	A	A	A	A	A	A	A	A	N	A	A	A	A	W	A	A	A	A	A	A	A	A	W	A	A	A	A
S27_1276523	T/C	27	1276523	+	NA	NA	NA	NA	NA	NA	T	Y	T	Y	T	C	Y	T	T	Y	Y	T	Y	Y	T	T	T	N	Y	T	Y	T	Y	Y	T	Y	T	Y	T	C	Y	T	T	T	Y	T	T	T	T
S27_1282062	T/A	27	1282062	+	NA	NA	NA	NA	NA	NA	T	T	T	T	T	N	T	T	T	T	W	T	T	T	N	T	T	N	T	T	T	T	T	T	T	W	T	T	N	T	T	T	T	T	W	T	T	T	T
S27_1296238	T/G	27	1296238	+	NA	NA	NA	NA	NA	NA	N	K	T	G	T	K	K	T	T	T	K	T	T	T	N	T	T	T	T	T	T	T	K	K	T	T	T	T	T	N	K	T	T	T	K	T	T	T	T
S27_1298457	C/T	27	1298457	+	NA	NA	NA	NA	NA	NA	C	Y	C	Y	C	Y	Y	C	C	Y	Y	C	T	Y	C	C	C	Y	Y	C	Y	C	Y	Y	C	Y	C	Y	C	Y	Y	C	C	C	Y	C	C	C	C
S27_1306641	C/T	27	1306641	+	NA	NA	NA	NA	NA	NA	C	Y	C	Y	C	T	Y	C	C	Y	Y	C	Y	Y	C	C	C	T	T	C	T	C	Y	Y	C	Y	C	N	C	Y	Y	C	C	C	Y	C	C	C	C
S27_1319667	A/T	27	1319667	+	NA	NA	NA	NA	NA	NA	A	A	A	A	A	A	A	A	A	A	W	A	A	A	A	A	A	A	A	A	A	A	A	A	A	W	A	A	A	A	A	A	A	A	W	A	A	A	A
S27_1320899	T/A	27	1320899	+	NA	NA	NA	NA	NA	NA	T	T	T	T	N	N	T	T	T	N	W	T	T	T	T	T	T	T	N	T	T	T	T	T	T	W	T	T	T	T	T	T	T	T	W	T	T	T	T
S27_1338661	A/T	27	1338661	+	NA	NA	NA	NA	NA	NA	A	W	A	W	A	W	W	A	A	W	W	A	W	W	A	A	A	W	W	A	A	A	W	W	A	W	A	W	A	W	W	A	A	A	W	A	A	A	A
S27_1345355	G/A	27	1345355	+	NA	NA	NA	NA	NA	NA	G	R	G	R	G	R	R	G	G	R	R	G	R	R	G	G	G	R	R	G	R	G	R	R	G	R	G	R	G	R	R	G	G	G	R	G	G	G	G
S27_1356241	A/C	27	1356241	+	NA	NA	NA	NA	NA	NA	A	M	A	M	A	M	M	A	A	M	M	A	M	M	A	A	A	M	M	A	M	A	M	M	A	M	A	M	A	M	M	A	A	A	M	A	A	A	A
S27_1356386	C/T	27	1356386	+	NA	NA	NA	NA	NA	NA	C	Y	C	Y	N	Y	Y	C	C	C	Y	C	Y	C	N	C	C	C	Y	C	Y	C	Y	Y	C	Y	C	Y	C	T	Y	C	C	C	Y	C	C	C	C
S27_1388084	A/G	27	1388084	+	NA	NA	NA	NA	NA	NA	A	R	A	R	N	A	R	A	A	G	R	A	N	A	N	A	N	R	G	A	A	A	R	R	A	R	A	R	A	G	G	A	A	A	R	A	A	A	A
S27_1417642	G/A	27	1417642	+	NA	NA	NA	NA	NA	NA	G	R	G	R	G	A	R	G	G	A	R	G	R	A	G	G	G	R	A	G	R	N	R	R	G	R	G	R	G	G	R	G	G	G	R	R	G	G	G
S27_1475739	G/A	27	1475739	+	NA	NA	NA	NA	NA	NA	G	R	G	R	G	R	A	G	G	R	R	G	R	R	G	G	G	R	R	G	R	G	R	R	G	R	G	R	G	G	R	G	G	G	R	R	G	G	G
S27_1477054	T/A	27	1477054	+	NA	NA	NA	NA	NA	NA	T	T	T	T	N	T	T	T	T	T	W	T	T	T	T	N	T	T	T	T	T	T	T	T	T	T	T	T	T	T	T	T	T	T	W	T	T	T	T
S27_1485748	G/A	27	1485748	+	NA	NA	NA	NA	NA	NA	G	R	G	R	G	R	R	G	G	R	R	G	R	R	G	G	G	R	R	G	R	G	R	R	G	R	G	R	G	R	R	G	G	G	R	R	G	G	G
S27_1487236	T/A	27	1487236	+	NA	NA	NA	NA	NA	NA	T	W	T	W	T	A	W	T	T	W	T	T	A	W	T	T	T	A	W	T	W	T	W	T	T	T	T	W	T	W	W	T	T	T	T	W	T	T	T
S27_1487525	G/A	27	1487525	+	NA	NA	NA	NA	NA	NA	G	R	G	R	N	R	R	G	G	R	G	G	G	G	N	G	G	R	R	G	A	G	R	R	G	G	G	G	G	A	R	G	N	G	G	R	G	G	G
S27_1522157	C/T	27	1522157	+	NA	NA	NA	NA	NA	NA	C	C	C	C	C	C	C	C	C	C	Y	C	C	C	C	C	C	C	C	C	C	C	C	C	C	Y	C	C	C	C	C	C	C	C	Y	C	C	C	C
S27_1536469	C/T	27	1536469	+	NA	NA	NA	NA	NA	NA	C	Y	N	Y	C	T	Y	C	C	T	Y	C	Y	C	N	C	C	Y	Y	C	Y	C	Y	Y	C	T	C	T	C	C	Y	C	C	C	Y	Y	C	C	C
S27_1536569	T/G	27	1536569	+	NA	NA	NA	NA	NA	NA	T	K	T	K	T	N	K	T	T	K	K	T	K	G	T	T	T	K	T	T	N	T	G	N	T	G	T	T	T	K	K	T	T	T	K	G	T	T	T
S27_1536902	T/C	27	1536902	+	NA	NA	NA	NA	NA	NA	T	Y	T	Y	T	Y	Y	T	T	Y	Y	T	Y	C	T	T	T	Y	Y	T	Y	T	Y	Y	T	Y	T	Y	T	Y	Y	T	T	T	Y	Y	T	T	T
S27_1537286	T/C	27	1537286	+	NA	NA	NA	NA	NA	NA	T	Y	T	Y	T	Y	Y	T	T	Y	Y	T	Y	Y	T	T	T	Y	Y	T	Y	T	Y	Y	T	Y	T	Y	T	Y	Y	T	T	T	Y	Y	T	T	T
S27_1537990	G/A	27	1537990	+	NA	NA	NA	NA	NA	NA	G	R	G	R	G	R	R	G	G	R	R	G	R	R	G	G	G	R	R	G	R	G	R	R	G	R	G	R	G	R	R	G	G	G	R	R	G	G	G
S27_1538090	T/A	27	1538090	+	NA	NA	NA	NA	NA	NA	T	W	T	W	T	W	W	T	T	W	W	T	W	W	T	T	T	W	W	T	W	T	W	W	T	W	T	W	T	W	W	T	T	T	W	W	T	T	T
S27_1545206	G/A	27	1545206	+	NA	NA	NA	NA	NA	NA	G	A	G	A	G	A	A	G	G	R	A	G	A	R	N	G	G	R	A	G	R	G	A	A	G	A	G	A	N	R	R	N	G	N	A	A	G	G	G
S27_1556377	C/A	27	1556377	+	NA	NA	NA	NA	NA	NA	C	M	C	M	N	A	M	C	N	M	C	C	M	M	C	C	C	A	M	C	C	C	M	M	C	C	C	C	C	M	M	C	C	C	C	M	C	C	C
S27_1564030	T/C	27	1564030	+	NA	NA	NA	NA	NA	NA	T	Y	T	Y	T	Y	Y	T	T	Y	Y	T	Y	Y	T	T	T	Y	Y	T	Y	T	Y	Y	T	Y	T	Y	T	Y	Y	T	T	T	Y	Y	T	T	T
S27_1564195	T/C	27	1564195	+	NA	NA	NA	NA	NA	NA	T	T	T	T	N	T	T	T	T	T	T	T	T	T	N	T	N	T	T	T	T	T	T	T	T	T	T	T	T	N	T	T	T	N	T	T	T	T	T
S27_1570425	A/G	27	1570425	+	NA	NA	NA	NA	NA	NA	A	A	A	A	N	N	A	A	A	A	A	A	A	A	N	A	A	A	A	A	A	A	A	A	A	A	A	A	A	A	A	A	A	N	A	A	A	A	A
S27_1571195	C/T	27	1571195	+	NA	NA	NA	NA	NA	NA	C	C	C	C	C	C	C	C	C	C	C	C	C	C	C	C	C	C	C	C	C	C	C	C	C	C	C	C	C	C	C	C	C	C	C	C	C	C	C
S27_1600113	G/A	27	1600113	+	NA	NA	NA	NA	NA	NA	G	R	G	R	G	R	R	G	G	R	R	G	R	R	G	G	G	R	R	G	R	G	R	R	G	R	G	R	G	R	R	G	G	G	R	R	G	G	G
S27_1602012	C/A	27	1602012	+	NA	NA	NA	NA	NA	NA	C	M	C	M	C	M	M	C	C	M	M	C	M	M	C	C	C	M	M	C	M	C	M	M	C	M	C	M	C	M	M	C	C	C	M	M	C	C	C
S27_1602128	T/G	27	1602128	+	NA	NA	NA	NA	NA	NA	T	K	T	K	T	K	K	T	T	K	K	T	G	K	N	T	T	K	K	T	K	T	K	K	T	K	T	K	T	T	K	T	T	T	K	K	T	T	T
S27_1602719	C/T	27	1602719	+	NA	NA	NA	NA	NA	NA	C	Y	C	Y	C	Y	Y	C	C	Y	Y	C	Y	Y	C	C	C	Y	Y	C	Y	C	Y	Y	C	Y	C	Y	C	Y	Y	C	C	C	Y	Y	C	C	C
S27_1621167	C/T	27	1621167	+	NA	NA	NA	NA	NA	NA	C	Y	C	Y	C	Y	Y	C	C	Y	Y	C	T	Y	C	N	C	Y	Y	C	Y	C	Y	Y	C	Y	C	Y	C	Y	Y	C	C	C	Y	Y	C	C	C
S27_1621267	A/T	27	1621267	+	NA	NA	NA	NA	NA	NA	A	W	A	W	A	W	W	A	A	W	W	A	W	W	A	A	A	W	W	A	W	A	W	T	A	W	A	W	A	W	W	A	A	A	W	W	A	A	A
S27_1627810	T/C	27	1627810	+	NA	NA	NA	NA	NA	NA	T	T	T	T	T	T	T	T	T	T	Y	T	T	T	T	T	T	T	T	T	T	T	T	T	T	Y	T	T	T	T	T	T	T	T	Y	T	T	T	T
S27_1628014	T/A	27	1628014	+	NA	NA	NA	NA	NA	NA	T	W	T	W	T	A	W	T	T	W	W	T	W	W	T	T	T	W	W	T	W	T	W	W	T	W	T	W	T	W	W	T	T	T	W	W	T	T	T
S27_1632568	T/G	27	1632568	+	NA	NA	NA	NA	NA	NA	T	K	T	G	T	N	K	T	T	T	K	T	K	K	N	T	T	K	K	T	K	T	K	K	T	K	T	K	T	T	K	T	T	N	K	K	T	T	T
S27_1632717	G/A	27	1632717	+	NA	NA	NA	NA	NA	NA	G	G	G	G	G	G	G	G	G	G	R	G	G	G	G	G	G	G	G	G	G	G	G	G	G	R	G	G	G	G	G	G	G	G	R	G	G	G	G
S27_1632963	G/A	27	1632963	+	NA	NA	NA	NA	NA	NA	G	R	G	R	G	G	R	G	G	R	R	G	R	G	N	G	N	R	G	G	R	G	A	R	G	G	G	R	G	G	N	G	G	G	G	R	G	N	G
S27_1642543	T/C	27	1642543	+	NA	NA	NA	NA	NA	NA	T	Y	T	Y	T	Y	Y	T	T	Y	Y	T	Y	Y	T	T	T	Y	Y	T	Y	T	Y	Y	T	Y	T	Y	T	Y	Y	T	T	T	Y	Y	T	T	T
S27_1668463	C/T	27	1668463	+	NA	NA	NA	NA	NA	NA	C	Y	C	Y	C	Y	Y	C	C	C	C	C	Y	Y	C	C	C	T	Y	C	T	C	Y	Y	C	C	C	Y	C	Y	Y	C	C	C	C	Y	C	C	C
S27_1687702	C/A	27	1687702	+	NA	NA	NA	NA	NA	NA	C	C	C	C	N	C	C	C	C	C	M	C	C	C	C	C	C	C	C	C	C	C	C	C	C	M	C	C	C	C	C	C	C	C	C	C	C	C	C
S27_1687955	A/G	27	1687955	+	NA	NA	NA	NA	NA	NA	A	R	A	R	A	R	R	A	A	R	R	A	G	R	N	A	A	R	R	A	R	A	R	R	A	R	A	R	A	R	R	A	A	A	A	R	A	A	A
S27_1717913	C/G	27	1717913	+	NA	NA	NA	NA	NA	NA	C	S	C	S	C	S	S	C	C	S	S	C	S	S	C	C	C	S	S	C	S	C	S	S	C	S	C	S	C	S	S	C	C	C	C	S	C	C	C
S27_1745695	C/T	27	1745695	+	NA	NA	NA	NA	NA	NA	C	Y	C	Y	N	T	Y	C	C	Y	Y	C	Y	T	C	C	C	Y	C	C	N	C	Y	Y	C	C	C	Y	C	N	Y	C	C	N	C	T	C	C	C
S27_1773413	A/G	27	1773413	+	NA	NA	NA	NA	NA	NA	A	R	A	R	N	R	R	A	A	R	R	A	R	R	A	A	A	R	R	A	R	A	R	R	A	R	A	R	A	R	R	A	A	A	A	R	A	A	A
S27_1781406	C/T	27	1781406	+	NA	NA	NA	NA	NA	NA	C	Y	C	Y	N	T	Y	C	C	Y	Y	C	T	Y	N	C	C	Y	Y	C	Y	C	Y	Y	C	Y	C	Y	C	T	Y	C	C	C	C	Y	C	C	C
S27_1783059	A/G	27	1783059	+	NA	NA	NA	NA	NA	NA	A	R	A	R	A	G	R	A	A	R	R	A	R	R	A	A	A	R	R	A	R	A	R	R	A	R	A	R	A	G	R	A	A	A	A	R	A	A	A
S27_1830052	G/A	27	1830052	+	NA	NA	NA	NA	NA	NA	N	A	G	A	N	A	R	G	G	A	R	G	R	R	N	G	N	R	A	G	A	G	A	R	G	R	R	R	N	A	R	G	G	N	G	R	G	G	G
S27_1843418	A/G	27	1843418	+	NA	NA	NA	NA	NA	NA	A	R	A	R	A	A	R	A	R	R	R	R	R	R	A	A	R	G	R	R	A	R	R	R	R	R	R	R	A	R	R	R	R	R	R	R	R	R	R
S27_1846419	A/T	27	1846419	+	NA	NA	NA	NA	NA	NA	A	A	A	A	A	A	A	A	A	A	A	A	A	A	A	A	A	A	A	A	A	A	A	A	A	A	A	A	A	A	A	A	A	A	A	A	A	A	A
S27_1850073	T/C	27	1850073	+	NA	NA	NA	NA	NA	NA	T	Y	T	Y	T	Y	Y	T	T	Y	T	T	Y	T	N	T	T	C	Y	T	Y	T	Y	Y	T	T	T	Y	T	Y	Y	N	T	T	T	Y	T	T	T
S27_1850187	T/C	27	1850187	+	NA	NA	NA	NA	NA	NA	T	Y	T	Y	T	T	Y	T	T	Y	C	T	C	Y	T	T	T	Y	T	T	T	T	Y	Y	T	Y	T	Y	T	C	Y	T	T	T	T	Y	T	T	T
S27_1857853	C/G	27	1857853	+	NA	NA	NA	NA	NA	NA	S	S	S	S	S	N	S	S	S	G	S	S	S	S	C	S	S	C	C	S	C	S	S	S	S	S	S	S	C	C	S	S	S	S	S	S	S	S	S
S28_59669	T/C	28	59669	+	NA	NA	NA	NA	NA	NA	Y	Y	T	Y	T	Y	T	Y	Y	T	T	T	Y	T	T	T	Y	T	T	T	Y	T	T	T	T	Y	T	Y	Y	T	T	T	T	T	Y	Y	T	T	Y
S28_65450	A/G	28	65450	+	NA	NA	NA	NA	NA	NA	R	R	A	R	A	N	A	R	R	A	A	A	R	A	A	A	R	A	A	A	R	A	A	A	A	R	A	R	R	A	A	A	A	A	R	R	A	A	R
S31_78312	T/G	31	78312	+	NA	NA	NA	NA	NA	NA	T	G	T	T	T	N	K	G	T	G	K	K	G	K	K	T	T	K	G	G	G	T	T	K	T	T	T	T	G	G	T	K	T	K	G	T	G	T	T
S32_67938	A/G	32	67938	+	NA	NA	NA	NA	NA	NA	A	A	A	A	A	A	A	A	A	A	A	A	A	A	R	A	A	R	A	A	R	A	A	A	A	A	A	A	A	A	A	A	A	A	A	A	A	A	A
S32_70849	C/G	32	70849	+	NA	NA	NA	NA	NA	NA	S	C	C	S	C	C	S	S	S	C	S	C	S	C	N	C	C	S	C	C	S	C	S	S	C	S	S	S	C	S	C	C	S	C	S	C	G	S	S
S32_71013	T/C	32	71013	+	NA	NA	NA	NA	NA	NA	Y	T	N	Y	T	N	Y	Y	Y	T	Y	T	Y	T	T	T	T	Y	T	T	Y	T	Y	T	T	Y	Y	Y	N	Y	T	T	Y	T	Y	T	Y	Y	Y
S32_119394	T/G	32	119394	+	NA	NA	NA	NA	NA	NA	K	T	T	K	G	N	K	K	G	T	K	T	K	T	N	T	T	G	T	T	K	T	K	K	T	K	K	K	T	K	T	T	K	T	K	T	K	K	K
S32_216557	A/C	32	216557	+	NA	NA	NA	NA	NA	NA	M	A	M	M	M	A	M	M	M	A	M	A	M	A	M	A	A	M	A	A	M	A	M	M	A	M	C	M	A	M	A	A	M	A	M	A	M	M	M
S33_9990	G/A	33	9990	+	NA	NA	NA	NA	NA	NA	G	R	G	R	G	R	G	G	G	R	R	G	R	R	G	G	G	R	R	G	R	G	R	R	G	R	G	R	R	G	G	G	G	G	G	R	G	G	G
S33_12305	A/G	33	12305	+	NA	NA	NA	NA	NA	NA	A	R	A	R	N	R	R	A	A	G	R	A	R	R	N	A	A	R	R	A	G	A	R	G	A	A	A	G	R	R	A	A	A	A	A	G	A	A	A
S33_12410	C/T	33	12410	+	NA	NA	NA	NA	NA	NA	C	Y	C	Y	C	Y	Y	C	C	Y	Y	C	C	Y	C	N	C	T	Y	C	Y	C	T	Y	C	Y	C	T	T	N	C	C	C	C	C	Y	C	N	C
S33_12842	A/C	33	12842	+	NA	NA	NA	NA	NA	NA	A	M	A	M	A	N	M	A	A	M	C	A	C	M	A	N	A	C	M	A	M	A	M	M	A	M	A	C	M	M	A	A	A	A	A	M	A	A	A
S33_12950	G/A	33	12950	+	NA	NA	NA	NA	NA	NA	G	A	G	R	N	N	R	G	G	A	A	G	R	R	N	G	G	R	A	G	A	G	A	R	G	R	G	A	A	R	G	G	G	G	G	R	G	G	G
S33_49602	A/G	33	49602	+	NA	NA	NA	NA	NA	NA	A	R	A	R	N	G	R	A	A	R	R	A	R	R	N	N	A	R	R	A	R	A	R	R	A	G	A	R	A	R	A	A	A	A	A	R	A	A	A
S33_49718	G/T	33	49718	+	NA	NA	NA	NA	NA	NA	G	K	G	K	G	G	K	G	G	T	G	G	K	G	G	G	G	K	K	G	T	G	K	K	G	G	G	T	G	K	G	G	N	G	G	K	G	G	G
S33_49867	G/A	33	49867	+	NA	NA	NA	NA	NA	NA	G	R	A	G	G	N	R	G	G	R	A	G	R	R	G	G	G	G	G	G	R	G	R	R	G	R	G	R	R	R	G	G	G	G	G	R	G	G	G
S33_161046	A/G	33	161046	+	NA	NA	NA	NA	NA	NA	A	R	A	R	A	R	R	A	A	R	R	A	R	R	A	A	A	R	R	A	R	A	R	R	A	R	A	R	R	R	A	A	A	A	A	R	A	A	A
S33_243575	C/T	33	243575	+	NA	NA	NA	NA	NA	NA	C	Y	C	Y	C	T	Y	C	C	Y	Y	C	Y	Y	C	C	C	Y	T	C	C	C	Y	Y	C	Y	C	Y	N	Y	C	C	C	C	C	Y	C	C	C
S33_243676	T/G	33	243676	+	NA	NA	NA	NA	NA	NA	T	K	T	K	N	N	K	T	T	K	K	T	K	K	T	T	T	K	K	T	K	T	K	K	T	K	T	G	K	T	T	T	T	T	T	K	T	T	T
S33_260583	A/G	33	260583	+	NA	NA	NA	NA	NA	NA	A	R	A	R	N	G	R	A	A	R	A	A	R	R	A	A	A	R	R	A	R	A	R	R	A	A	A	R	R	R	A	A	A	A	A	R	A	A	A
S33_264381	A/G	33	264381	+	NA	NA	NA	NA	NA	NA	A	R	A	R	A	G	R	A	A	A	R	A	R	R	A	A	A	A	R	A	R	A	R	R	A	R	A	R	R	R	A	A	A	A	A	R	A	A	A
S33_265191	C/A	33	265191	+	NA	NA	NA	NA	NA	NA	C	C	C	M	C	N	M	C	C	M	C	C	M	N	N	C	C	N	A	C	M	C	M	M	C	C	C	A	N	N	C	C	N	C	C	M	C	C	C
S33_269776	A/T	33	269776	+	NA	NA	NA	NA	NA	NA	A	W	A	W	A	A	A	A	A	W	A	A	A	T	A	A	A	T	N	A	W	A	T	A	A	A	A	A	W	A	A	A	N	A	A	W	A	N	A
S33_323823	T/C	33	323823	+	NA	NA	NA	NA	NA	NA	N	Y	T	T	T	T	Y	T	T	Y	Y	T	T	Y	T	T	T	C	Y	T	Y	T	Y	Y	T	Y	T	Y	Y	T	T	T	T	T	T	Y	T	T	T
S33_365487	C/G	33	365487	+	NA	NA	NA	NA	NA	NA	C	S	C	S	C	S	S	C	C	S	S	C	S	S	C	C	C	S	S	C	S	C	S	S	C	S	C	S	S	S	C	C	C	C	C	S	C	C	C
S33_428555	A/G	33	428555	+	NA	NA	NA	NA	NA	NA	A	R	A	R	A	G	G	A	A	R	R	A	R	R	A	A	A	R	R	A	R	A	R	R	A	R	A	R	R	R	A	A	A	A	A	R	A	A	A
S33_429729	A/C	33	429729	+	NA	NA	NA	NA	NA	NA	A	M	A	M	A	N	M	A	A	M	M	A	M	M	N	A	A	M	C	A	M	A	M	M	A	M	A	M	A	M	A	A	A	A	A	M	A	A	A
S33_437086	T/A	33	437086	+	NA	NA	NA	NA	NA	NA	T	W	T	W	T	W	A	T	T	T	W	T	W	W	N	N	T	W	W	T	A	T	W	W	T	T	T	W	T	W	T	T	T	T	T	W	T	T	T
S33_445268	C/T	33	445268	+	NA	NA	NA	NA	NA	NA	C	C	Y	N	C	C	C	C	C	C	C	C	C	C	C	C	C	C	C	C	C	C	C	C	C	C	C	C	C	C	C	C	C	C	C	C	C	C	C
S33_449814	C/A	33	449814	+	NA	NA	NA	NA	NA	NA	C	C	C	C	C	N	C	C	C	C	M	C	C	C	C	C	C	C	N	C	C	C	C	C	C	M	C	C	C	C	C	C	C	C	C	C	C	C	C
S33_517256	C/T	33	517256	+	NA	NA	NA	NA	NA	NA	C	Y	C	Y	C	Y	Y	C	C	Y	Y	C	Y	Y	C	C	C	Y	Y	C	Y	C	Y	Y	C	Y	C	Y	T	T	C	C	C	C	C	Y	C	C	C
S33_619463	C/G	33	619463	+	NA	NA	NA	NA	NA	NA	C	C	C	C	C	C	C	C	C	C	S	C	C	C	C	C	C	C	C	C	C	C	C	C	C	S	C	C	C	C	C	C	C	C	C	C	C	C	C
S33_622360	G/A	33	622360	+	NA	NA	NA	NA	NA	NA	G	R	G	R	G	R	R	G	G	R	G	G	R	R	G	G	G	R	R	G	R	G	R	R	G	G	G	R	R	R	G	G	G	G	G	R	G	G	G
S33_706843	C/T	33	706843	+	NA	NA	NA	NA	NA	NA	C	Y	C	Y	C	Y	Y	C	C	Y	Y	C	Y	Y	C	C	C	Y	Y	C	Y	C	Y	Y	C	Y	C	Y	Y	Y	C	C	C	C	C	Y	C	C	C
S33_749480	A/G	33	749480	+	NA	NA	NA	NA	NA	NA	A	R	R	R	R	R	R	R	R	R	R	R	R	A	A	A	R	R	R	R	A	R	R	R	A	R	A	R	R	A	R	R	R	R	R	R	R	R	A
S33_871935	T/G	33	871935	+	NA	NA	NA	NA	NA	NA	N	K	T	K	N	G	K	T	T	K	K	T	K	K	T	T	T	N	K	T	T	T	K	K	T	K	T	G	T	N	T	T	T	T	T	K	T	T	T
S33_872917	C/A	33	872917	+	NA	NA	NA	NA	NA	NA	C	C	C	C	C	C	M	C	C	C	C	C	C	C	C	C	C	C	C	C	C	C	C	C	C	C	C	C	C	C	C	C	C	C	C	C	C	C	C
S33_1054153	G/A	33	1054153	+	NA	NA	NA	NA	NA	NA	G	R	G	R	G	R	R	G	G	R	R	G	R	R	G	G	G	R	G	G	R	G	R	R	G	R	G	R	R	R	G	G	G	G	G	R	G	G	G
S33_1055078	T/A	33	1055078	+	NA	NA	NA	NA	NA	NA	N	A	T	W	T	T	W	T	T	A	T	T	T	T	T	T	T	T	W	T	W	T	W	W	T	T	N	N	A	N	T	T	T	T	T	A	T	T	T
S33_1055182	C/T	33	1055182	+	NA	NA	NA	NA	NA	NA	C	Y	C	Y	N	N	Y	C	Y	Y	Y	N	Y	C	N	C	C	T	Y	C	Y	C	Y	C	C	Y	N	Y	T	Y	C	C	C	C	C	Y	C	C	C
S33_1070613	T/G	33	1070613	+	NA	NA	NA	NA	NA	NA	T	K	T	K	T	K	K	T	T	N	K	T	K	K	N	T	T	K	K	T	K	T	K	K	T	K	T	T	T	K	T	T	T	T	T	K	T	T	T
S33_1085708	A/G	33	1085708	+	NA	NA	NA	NA	NA	NA	A	A	A	A	N	A	A	A	A	A	R	A	A	A	N	A	A	A	A	A	A	A	A	A	A	R	A	A	N	N	A	A	A	N	A	A	A	A	A
S33_1085808	G/A	33	1085808	+	NA	NA	NA	NA	NA	NA	G	R	G	R	N	R	A	G	G	A	R	G	R	R	G	G	G	R	R	G	R	G	R	R	G	R	G	R	N	G	G	G	G	G	G	R	G	G	G
S33_1140289	G/T	33	1140289	+	NA	NA	NA	NA	NA	NA	G	K	G	K	G	K	K	G	G	K	K	G	K	K	G	G	G	K	K	G	K	G	K	K	G	K	G	K	K	K	G	G	G	G	G	K	G	G	G
S33_1162079	T/C	33	1162079	+	NA	NA	NA	NA	NA	NA	T	Y	T	Y	T	Y	Y	T	T	Y	Y	T	Y	Y	T	T	T	Y	Y	T	Y	T	Y	Y	T	Y	T	Y	Y	Y	T	T	T	T	T	Y	T	T	T
S33_1236308	A/G	33	1236308	+	NA	NA	NA	NA	NA	NA	A	R	A	R	A	G	R	A	A	R	A	A	R	R	N	A	A	N	R	A	R	A	R	G	A	R	A	R	R	R	A	A	A	A	A	R	A	A	A
S33_1243607	T/C	33	1243607	+	NA	NA	NA	NA	NA	NA	T	Y	T	Y	T	Y	Y	T	T	Y	Y	T	Y	Y	T	T	T	Y	Y	T	Y	T	Y	Y	T	Y	T	Y	Y	Y	T	T	T	T	T	Y	T	T	T
S34_149481	G/T	34	149481	+	NA	NA	NA	NA	NA	NA	G	K	G	K	G	K	K	G	G	K	K	G	K	K	G	G	G	K	K	G	K	G	K	K	G	K	G	K	K	K	G	G	G	G	G	K	G	G	G
S34_192150	G/A	34	192150	+	NA	NA	NA	NA	NA	NA	G	R	G	R	G	G	R	G	G	R	R	G	R	R	G	G	G	G	R	G	R	G	R	G	G	R	G	R	A	A	G	G	G	G	G	R	G	G	G
S34_192269	C/G	34	192269	+	NA	NA	NA	NA	NA	NA	C	S	C	S	C	C	S	C	C	S	S	C	S	S	C	C	C	C	G	C	S	C	S	S	C	S	C	S	S	C	C	C	C	C	C	S	C	C	C
S34_217592	T/G	34	217592	+	NA	NA	NA	NA	NA	NA	T	K	T	K	T	G	K	T	T	K	K	T	K	K	T	T	T	K	K	T	K	T	K	K	T	K	T	K	K	K	T	T	T	T	T	K	T	T	T
S34_250216	T/A	34	250216	+	NA	NA	NA	NA	NA	NA	T	W	T	W	T	W	W	T	T	W	W	T	W	W	T	T	T	W	W	T	W	T	W	W	T	W	T	W	W	W	T	T	T	T	T	W	T	T	T
S36_200590	A/G	36	200590	+	NA	NA	NA	NA	NA	NA	A	A	A	A	A	A	A	A	A	A	A	A	A	A	A	A	A	A	A	A	A	A	A	A	A	A	A	A	A	A	A	A	A	A	A	A	A	A	A
S37_28871	C/G	37	28871	+	NA	NA	NA	NA	NA	NA	C	S	C	C	C	N	S	S	C	S	S	S	S	S	G	C	C	G	S	S	S	C	C	S	C	C	C	C	S	G	C	G	C	N	S	C	S	C	C
S37_28989	A/G	37	28989	+	NA	NA	NA	NA	NA	NA	A	R	A	A	A	N	R	R	A	G	R	R	R	R	A	A	A	R	R	G	R	A	A	R	A	A	A	A	A	R	A	R	A	R	R	A	R	A	A
S37_45860	G/C	37	45860	+	NA	NA	NA	NA	NA	NA	G	S	G	G	N	G	S	S	N	S	S	C	G	S	N	G	G	G	C	S	C	G	G	S	G	G	G	G	G	C	G	S	G	S	S	G	S	N	G
S37_52668	T/C	37	52668	+	NA	NA	NA	NA	NA	NA	T	Y	T	T	T	N	Y	T	T	Y	T	Y	T	C	N	T	T	C	C	Y	Y	T	T	T	T	T	T	T	T	Y	T	T	T	Y	T	T	Y	T	T
S37_52785	C/T	37	52785	+	NA	NA	NA	NA	NA	NA	C	C	C	C	C	C	C	Y	C	C	Y	C	C	C	C	C	C	C	C	C	C	C	C	Y	C	C	C	C	C	C	C	Y	C	C	Y	C	C	C	C
S37_52933	C/A	37	52933	+	NA	NA	NA	NA	NA	NA	C	M	C	C	C	C	M	M	C	A	M	A	M	A	M	C	C	M	M	M	M	C	C	M	C	C	C	C	N	M	C	M	C	A	M	C	A	C	C
S37_105267	A/G	37	105267	+	NA	NA	NA	NA	NA	NA	A	R	A	A	A	A	R	R	A	R	R	R	R	R	R	A	A	R	R	G	R	A	A	R	A	A	A	A	R	R	A	R	A	A	R	A	R	A	A
S37_144527	G/T	37	144527	+	NA	NA	NA	NA	NA	NA	G	K	G	G	G	G	K	K	G	K	K	G	G	K	N	G	G	K	K	K	K	G	G	K	G	G	G	G	G	G	G	T	G	G	K	G	K	G	G
S37_144672	C/T	37	144672	+	NA	NA	NA	NA	NA	NA	C	Y	C	C	C	N	Y	Y	C	T	Y	Y	Y	Y	T	C	C	T	C	Y	Y	C	C	Y	C	C	C	C	C	C	C	Y	C	Y	Y	C	Y	N	C
S37_215841	G/A	37	215841	+	NA	NA	NA	NA	NA	NA	G	R	G	G	G	N	R	R	G	R	R	G	R	R	A	G	G	R	R	R	A	G	G	R	G	G	G	G	A	R	G	G	G	G	R	G	R	G	G
S37_268662	A/T	37	268662	+	NA	NA	NA	NA	NA	NA	A	W	A	A	N	N	T	W	A	W	W	A	W	W	N	A	A	A	W	W	W	A	A	W	A	A	A	A	W	W	A	W	A	T	W	A	A	A	A
S37_270057	T/A	37	270057	+	NA	NA	NA	NA	NA	NA	T	W	T	T	T	T	W	W	T	W	W	W	W	W	T	T	T	W	W	W	W	T	T	W	T	T	T	T	W	W	T	W	T	W	W	T	W	T	T
S37_495032	T	37	495032	+	NA	NA	NA	NA	NA	NA	T	T	T	T	T	T	T	T	T	T	T	T	T	T	T	T	T	T	T	T	T	T	T	T	T	T	T	T	T	T	T	T	T	T	T	T	T	T	T
S37_497616	T	37	497616	+	NA	NA	NA	NA	NA	NA	T	T	T	T	T	T	T	T	T	T	T	T	T	T	T	T	T	T	T	T	T	T	T	T	T	T	T	T	T	T	T	T	T	T	T	T	T	T	T
S37_498018	T	37	498018	+	NA	NA	NA	NA	NA	NA	T	T	T	T	T	T	T	T	T	T	T	T	T	T	T	T	T	T	T	T	T	T	T	T	T	T	T	T	T	T	T	T	T	T	T	T	T	T	T
S37_498954	T	37	498954	+	NA	NA	NA	NA	NA	NA	T	T	T	T	T	T	T	T	T	T	T	T	T	T	T	T	T	T	T	T	T	T	T	T	T	T	T	T	T	T	T	T	T	T	T	T	T	T	T
S39_73412	A/T	39	73412	+	NA	NA	NA	NA	NA	NA	T	W	A	W	A	W	A	W	W	A	A	A	W	A	A	A	W	A	A	A	W	A	A	A	A	W	A	W	W	A	A	A	A	A	W	W	A	A	W
S39_73519	T/A/C	39	73519	+	NA	NA	NA	NA	NA	NA	T	W	T	W	N	T	T	Y	W	T	T	T	W	T	N	T	W	T	T	T	W	T	T	T	T	Y	T	W	W	T	T	T	T	T	Y	W	T	T	Y
S41_92139	C/T	41	92139	+	NA	NA	NA	NA	NA	NA	C	Y	C	C	C	Y	Y	C	C	C	C	C	Y	Y	Y	Y	C	C	Y	C	Y	C	C	C	C	C	Y	C	C	Y	Y	C	Y	C	C	C	Y	Y	C
S41_116402	G/A	41	116402	+	NA	NA	NA	NA	NA	NA	G	R	R	G	G	R	A	R	G	G	G	G	R	R	A	A	G	G	R	G	R	G	G	G	G	G	R	G	G	A	R	G	A	G	G	G	R	R	G
S41_117209	G/T	41	117209	+	NA	NA	NA	NA	NA	NA	G	K	G	G	K	K	K	K	G	G	G	G	K	K	K	K	G	G	K	G	K	G	G	G	G	G	K	G	G	K	K	G	G	G	G	G	K	K	G
S41_118066	A/G	41	118066	+	NA	NA	NA	NA	NA	NA	A	R	A	A	R	R	R	R	A	A	A	A	R	R	R	R	A	A	R	A	R	A	A	A	A	A	R	A	A	R	R	A	R	A	A	A	R	R	A
S41_124276	T/C	41	124276	+	NA	NA	NA	NA	NA	NA	T	Y	T	T	C	N	Y	Y	T	T	T	T	Y	T	C	C	T	T	Y	T	Y	T	T	T	T	T	Y	T	T	Y	T	T	Y	T	T	T	Y	C	T
S41_124378	T/A	41	124378	+	NA	NA	NA	NA	NA	NA	T	W	T	T	A	A	W	W	T	T	T	T	W	A	N	W	T	T	W	T	W	T	T	T	T	T	W	T	N	T	W	T	W	N	T	T	W	A	T
S41_125914	G/A	41	125914	+	NA	NA	NA	NA	NA	NA	G	R	G	G	A	R	R	R	G	G	G	G	R	R	G	R	G	N	R	G	R	G	G	G	G	G	A	G	G	R	R	G	R	G	G	G	R	R	G
S41_126024	G/A	41	126024	+	NA	NA	NA	NA	NA	NA	G	R	G	G	N	G	R	G	G	G	G	G	G	R	N	R	G	G	R	G	G	G	G	G	G	G	G	G	G	R	A	G	R	N	G	G	R	R	G
S41_132418	C/T	41	132418	+	NA	NA	NA	NA	NA	NA	C	Y	C	C	Y	Y	Y	Y	C	C	C	C	Y	Y	Y	Y	C	C	Y	C	Y	C	C	C	C	C	Y	C	C	Y	Y	C	Y	C	C	C	Y	Y	C
S41_138072	T/C	41	138072	+	NA	NA	NA	NA	NA	NA	T	Y	T	T	N	C	Y	T	T	T	T	T	Y	Y	N	Y	T	T	Y	T	Y	T	T	T	T	T	Y	T	N	C	Y	T	Y	T	T	T	Y	T	T
S41_138195	G/A	41	138195	+	NA	NA	NA	NA	NA	NA	G	R	G	G	N	N	R	R	G	N	G	G	G	R	R	R	G	G	R	G	G	G	G	G	G	G	R	G	N	A	R	G	A	G	G	G	R	R	G
S41_186614	A/G	41	186614	+	NA	NA	NA	NA	NA	NA	A	A	A	A	A	A	A	R	A	A	A	A	A	A	A	A	A	A	A	A	A	A	A	A	A	A	A	A	A	A	A	A	A	A	A	A	A	A	A
S41_186748	G/A	41	186748	+	NA	NA	NA	NA	NA	NA	G	R	G	G	R	G	G	R	G	G	G	G	G	G	G	G	G	G	R	G	G	G	G	G	G	G	G	G	G	G	R	G	R	G	G	G	G	G	G
S41_208756	G/T	41	208756	+	NA	NA	NA	NA	NA	NA	G	K	G	G	T	N	K	K	G	G	G	G	K	K	T	G	G	G	K	G	K	G	G	G	G	G	K	G	G	K	K	G	T	G	G	G	K	K	G
S41_209123	T/C	41	209123	+	NA	NA	NA	NA	NA	NA	T	Y	T	T	N	C	Y	C	T	T	T	T	Y	Y	N	N	T	T	Y	T	Y	T	T	T	T	T	Y	T	T	T	T	T	Y	T	T	T	Y	Y	T
S41_209262	A/C	41	209262	+	NA	NA	NA	NA	NA	NA	A	M	A	A	A	A	M	A	A	A	A	A	M	M	C	M	A	A	M	A	M	A	A	A	A	A	M	A	A	M	M	A	M	A	A	A	M	M	A
S41_213799	C/T	41	213799	+	NA	NA	NA	NA	NA	NA	C	Y	Y	C	C	C	Y	Y	C	C	C	C	Y	Y	N	Y	C	C	Y	C	T	C	C	C	C	C	T	C	C	Y	Y	C	T	N	C	C	Y	Y	C
S41_214627	C/T	41	214627	+	NA	NA	NA	NA	NA	NA	C	Y	C	C	Y	Y	Y	Y	C	C	C	C	Y	Y	T	Y	C	C	Y	C	T	C	C	C	C	C	Y	C	C	Y	Y	C	Y	C	C	C	Y	Y	C
S42_33793	T/C	42	33793	+	NA	NA	NA	NA	NA	NA	T	T	Y	T	T	T	T	T	T	T	T	T	T	T	T	T	T	T	T	T	T	T	T	T	T	T	T	T	T	T	T	T	T	T	T	T	T	T	T
S42_39378	G/C	42	39378	+	NA	NA	NA	NA	NA	NA	S	G	G	S	C	C	S	G	G	G	S	G	S	G	C	G	G	S	S	S	G	S	G	G	S	S	G	G	S	G	S	C	C	G	G	G	S	G	S
S42_39504	A/T	42	39504	+	NA	NA	NA	NA	NA	NA	N	A	A	W	A	T	W	A	W	A	W	A	W	A	N	W	A	A	W	W	W	W	A	A	W	T	A	A	W	A	W	T	W	W	A	A	W	A	W
S42_56367	G/A	42	56367	+	NA	NA	NA	NA	NA	NA	R	G	G	R	R	R	R	G	R	G	R	G	R	G	G	A	G	R	R	R	G	R	G	G	R	R	G	G	R	G	R	R	R	R	G	G	R	G	R
S42_90260	A/C	42	90260	+	NA	NA	NA	NA	NA	NA	M	A	A	M	M	A	M	A	M	A	M	A	M	A	A	C	A	M	M	M	M	M	A	A	M	M	A	A	M	A	M	M	C	M	A	A	M	A	M
S42_115393	C/T	42	115393	+	NA	NA	NA	NA	NA	NA	Y	C	C	Y	Y	Y	Y	C	Y	C	Y	C	Y	C	Y	T	C	C	Y	Y	Y	Y	C	C	Y	Y	C	C	Y	C	Y	Y	Y	Y	C	C	Y	C	Y
S42_126515	T/C	42	126515	+	NA	NA	NA	NA	NA	NA	C	T	T	Y	N	Y	Y	T	Y	T	Y	T	Y	T	Y	T	T	Y	C	Y	T	Y	T	T	Y	Y	T	T	Y	T	Y	T	Y	Y	T	T	Y	T	Y
S42_126656	G/A	42	126656	+	NA	NA	NA	NA	NA	NA	R	G	G	R	A	A	R	G	R	G	R	G	R	G	G	R	G	N	R	R	G	R	G	G	R	R	G	G	R	G	R	G	G	R	G	G	R	G	R
S42_127350	G/C	42	127350	+	NA	NA	NA	NA	NA	NA	G	G	G	G	G	G	G	G	G	G	G	G	G	G	G	G	G	G	G	G	G	G	G	G	G	G	G	G	G	G	G	G	G	G	G	G	G	G	G
S42_127761	G/A	42	127761	+	NA	NA	NA	NA	NA	NA	R	G	G	R	R	A	R	G	R	G	R	G	R	G	N	G	G	R	R	R	G	R	G	G	R	R	G	G	R	G	R	R	R	R	G	G	R	G	R
S42_140094	T/C	42	140094	+	NA	NA	NA	NA	NA	NA	N	T	T	Y	T	T	Y	T	Y	T	T	T	Y	N	N	C	T	T	T	Y	N	Y	T	T	Y	T	T	T	T	T	C	T	Y	C	T	T	Y	T	T
S42_140385	T/C	42	140385	+	NA	NA	NA	NA	NA	NA	Y	T	T	T	Y	N	T	T	T	T	Y	T	T	T	N	T	T	N	T	T	T	T	T	T	T	Y	T	T	T	T	T	Y	T	N	T	T	T	T	Y
S42_140703	C/T	42	140703	+	NA	NA	NA	NA	NA	NA	C	C	C	Y	Y	Y	Y	C	C	C	Y	C	C	C	N	Y	C	Y	Y	Y	C	Y	C	C	Y	Y	C	C	Y	C	Y	Y	C	Y	C	C	Y	C	Y
S42_146781	A/T	42	146781	+	NA	NA	NA	NA	NA	NA	A	A	A	W	A	T	W	A	W	A	A	A	A	A	A	W	A	A	W	W	W	W	A	A	W	A	A	A	W	A	W	A	W	W	A	A	W	A	A
S42_152808	C/A	42	152808	+	NA	NA	NA	NA	NA	NA	M	C	C	M	A	N	M	C	M	N	M	C	M	C	N	N	C	C	M	A	M	M	C	C	M	M	C	C	M	C	M	A	A	M	C	C	M	C	M
S42_165893	C/T	42	165893	+	NA	NA	NA	NA	NA	NA	Y	C	C	Y	C	Y	Y	C	Y	C	Y	C	Y	C	Y	Y	C	Y	Y	Y	C	Y	C	C	Y	Y	C	C	Y	C	Y	Y	Y	Y	C	C	Y	C	Y
S42_166025	T/A	42	166025	+	NA	NA	NA	NA	NA	NA	W	T	T	W	W	W	W	T	W	T	W	T	W	T	W	W	T	W	W	W	T	W	T	T	W	W	T	T	W	T	W	W	W	W	T	T	W	T	W
S42_171438	T/A	42	171438	+	NA	NA	NA	NA	NA	NA	T	T	T	T	T	T	T	T	T	T	T	T	T	T	T	T	T	T	T	T	T	T	T	T	T	T	T	T	T	T	T	T	T	T	T	T	T	T	T
S42_175323	T/C	42	175323	+	NA	NA	NA	NA	NA	NA	T	T	T	T	T	T	T	T	T	T	T	T	T	T	T	T	T	T	T	T	T	T	T	T	T	T	T	T	T	T	T	T	T	T	T	T	T	T	T
S42_182393	C/T	42	182393	+	NA	NA	NA	NA	NA	NA	Y	C	C	Y	Y	Y	Y	C	Y	C	Y	C	Y	C	Y	Y	C	Y	Y	Y	Y	Y	C	C	Y	Y	C	C	Y	C	Y	Y	Y	Y	C	C	Y	C	Y
S42_205580	G/A	42	205580	+	NA	NA	NA	NA	NA	NA	G	G	G	G	G	G	G	G	G	G	G	G	G	G	G	G	G	G	G	G	G	G	G	G	G	G	G	G	G	G	G	G	G	G	G	G	G	G	G
S42_237202	T/C	42	237202	+	NA	NA	NA	NA	NA	NA	Y	T	T	Y	Y	Y	Y	T	Y	T	Y	T	Y	T	Y	Y	T	T	Y	Y	T	Y	T	T	Y	Y	T	T	Y	T	Y	Y	Y	T	T	T	Y	T	Y
S42_279557	C/T	42	279557	+	NA	NA	NA	NA	NA	NA	C	C	C	Y	Y	T	Y	C	Y	C	Y	N	Y	C	N	C	C	N	C	Y	Y	Y	C	C	Y	Y	C	C	Y	N	Y	T	Y	C	C	C	Y	N	Y
S42_285879	G/T	42	285879	+	NA	NA	NA	NA	NA	NA	K	G	G	K	K	K	K	G	K	G	K	G	K	G	K	K	G	K	K	K	G	K	G	G	K	K	G	G	K	G	K	K	K	K	G	G	K	G	K
S42_287221	C/A	42	287221	+	NA	NA	NA	NA	NA	NA	M	C	C	M	M	A	M	C	M	C	M	C	N	C	C	M	C	M	M	M	C	M	C	C	M	M	C	C	C	C	M	M	M	M	C	C	M	C	M
S42_317980	T/C	42	317980	+	NA	NA	NA	NA	NA	NA	Y	T	T	Y	Y	Y	Y	T	Y	T	Y	T	Y	T	Y	Y	T	Y	Y	Y	Y	Y	T	T	Y	Y	T	T	Y	T	Y	Y	Y	Y	T	T	Y	T	Y
S42_323602	C/T	42	323602	+	NA	NA	NA	NA	NA	NA	Y	C	C	Y	Y	Y	Y	C	Y	C	Y	C	Y	C	Y	Y	C	Y	Y	Y	C	Y	C	C	Y	Y	C	C	Y	C	Y	Y	Y	Y	C	C	Y	C	Y
S42_324708	A/T	42	324708	+	NA	NA	NA	NA	NA	NA	W	A	A	W	A	W	W	A	W	A	W	A	W	A	A	A	A	W	W	W	A	W	A	A	W	W	A	A	W	A	W	W	W	W	A	A	W	A	W
S42_370738	A/G	42	370738	+	NA	NA	NA	NA	NA	NA	A	A	A	A	A	A	A	A	A	A	A	A	A	A	A	A	A	A	A	R	A	A	A	A	A	A	A	A	A	A	A	A	A	A	A	A	A	A	A
S42_370873	G/A	42	370873	+	NA	NA	NA	NA	NA	NA	R	G	G	R	G	N	G	G	N	G	R	G	G	G	G	G	G	R	G	R	A	R	G	G	R	R	G	G	R	G	N	G	G	A	G	G	R	G	R
S42_372481	A/C	42	372481	+	NA	NA	NA	NA	NA	NA	C	A	A	A	M	N	A	A	A	A	M	A	A	A	N	A	A	A	A	A	A	A	A	A	A	M	A	A	N	A	A	C	A	A	A	A	A	A	M
S42_394756	T/G	42	394756	+	NA	NA	NA	NA	NA	NA	T	T	T	K	T	G	K	T	T	T	T	T	K	T	G	N	T	T	G	K	T	K	T	T	K	T	T	T	K	T	K	T	K	N	T	T	K	T	T
S42_400750	T/G	42	400750	+	NA	NA	NA	NA	NA	NA	K	T	T	K	K	K	K	T	K	T	K	T	K	T	G	K	T	G	K	K	K	K	T	T	K	K	T	T	K	T	K	K	K	K	T	T	K	T	K
S42_404128	C/G	42	404128	+	NA	NA	NA	NA	NA	NA	N	C	C	C	C	N	C	C	C	C	C	C	C	C	N	C	C	C	C	C	C	C	C	C	C	C	C	C	C	C	C	C	C	N	C	C	C	C	C
S42_404230	A/C	42	404230	+	NA	NA	NA	NA	NA	NA	A	A	A	A	N	A	A	A	A	A	A	A	A	A	A	A	A	N	A	A	A	A	A	A	A	A	A	A	A	A	A	A	A	A	A	A	A	A	A
S42_404330	G/A	42	404330	+	NA	NA	NA	NA	NA	NA	G	G	G	G	G	G	G	G	G	G	G	G	G	G	G	G	G	G	N	G	G	G	G	G	G	G	G	G	G	G	G	G	G	G	G	G	G	G	G
S42_404434	T/C	42	404434	+	NA	NA	NA	NA	NA	NA	C	T	T	Y	T	N	Y	T	Y	T	Y	T	Y	T	N	T	T	C	C	Y	T	Y	T	T	Y	T	T	N	Y	T	Y	C	C	N	T	T	Y	N	Y
S42_404608	G/T	42	404608	+	NA	NA	NA	NA	NA	NA	G	G	G	G	G	G	G	G	G	G	G	G	G	G	G	G	G	G	G	G	G	G	G	G	G	G	G	G	G	G	G	G	G	G	G	G	G	G	G
S42_426492	C/T	42	426492	+	NA	NA	NA	NA	NA	NA	Y	C	Y	Y	Y	Y	Y	C	Y	C	Y	C	Y	C	Y	Y	C	Y	Y	Y	C	Y	C	C	Y	Y	C	C	Y	C	Y	Y	Y	Y	C	C	Y	C	Y
S42_429419	T/G	42	429419	+	NA	NA	NA	NA	NA	NA	K	T	T	K	K	K	K	T	K	T	K	T	K	T	K	K	T	K	K	K	K	K	T	T	K	K	T	T	K	T	K	K	K	K	T	T	K	T	K
S42_429590	A/G	42	429590	+	NA	NA	NA	NA	NA	NA	G	A	A	R	G	R	R	A	R	A	R	A	R	A	R	R	A	G	R	R	A	R	A	A	R	R	A	A	R	A	R	R	A	R	A	A	R	A	R
S42_437309	T/G	42	437309	+	NA	NA	NA	NA	NA	NA	K	T	T	K	K	K	K	T	K	T	K	T	K	T	K	K	T	K	K	K	K	K	T	T	K	K	T	T	K	T	K	K	K	K	T	T	K	T	K
S42_441473	T	42	441473	+	NA	NA	NA	NA	NA	NA	T	T	T	T	T	T	T	T	T	T	T	T	T	T	T	T	T	T	T	T	T	T	T	T	T	T	T	T	T	T	T	T	T	T	T	T	T	T	T
S42_545153	T/C	42	545153	+	NA	NA	NA	NA	NA	NA	T	T	T	Y	N	C	C	T	Y	T	Y	N	Y	T	N	N	T	C	Y	Y	Y	Y	T	T	T	Y	T	T	Y	T	Y	T	Y	Y	T	T	Y	T	Y
S42_552508	G/A	42	552508	+	NA	NA	NA	NA	NA	NA	G	G	G	R	G	N	R	G	G	G	G	G	A	G	N	R	G	G	R	R	N	R	G	G	R	G	G	G	A	G	G	G	G	A	G	G	A	G	G
S42_557286	G/A	42	557286	+	NA	NA	NA	NA	NA	NA	G	N	A	R	G	G	R	A	G	N	G	A	G	A	G	G	A	R	G	G	R	G	N	A	G	G	A	A	G	A	G	G	G	R	A	N	G	A	R
S42_681961	A/G	42	681961	+	NA	NA	NA	NA	NA	NA	A	A	A	A	A	A	A	A	A	A	A	A	A	A	A	A	A	A	A	A	A	A	A	A	A	A	A	A	A	A	A	A	A	R	A	A	A	A	A
S42_684480	C/G	42	684480	+	NA	NA	NA	NA	NA	NA	C	C	C	C	S	C	C	C	C	C	C	C	C	C	C	C	C	C	C	C	C	C	C	C	C	C	C	C	C	C	C	C	C	C	C	C	C	C	C
S42_696342	T	42	696342	+	NA	NA	NA	NA	NA	NA	T	T	T	T	T	N	T	T	T	T	T	T	T	T	T	T	T	T	T	T	T	T	T	T	T	T	T	T	T	T	T	T	T	T	T	T	T	T	T
S42_715957	A/G	42	715957	+	NA	NA	NA	NA	NA	NA	G	N	A	A	R	A	A	A	A	N	R	A	A	A	G	A	A	G	A	A	A	A	A	A	A	G	A	A	A	A	R	R	A	A	A	N	A	A	R
S42_718692	T/C	42	718692	+	NA	NA	NA	NA	NA	NA	T	T	T	Y	Y	Y	T	T	C	T	Y	T	T	T	C	Y	T	Y	Y	Y	Y	Y	T	T	Y	Y	T	T	T	T	Y	T	Y	Y	T	T	Y	T	Y
S42_729988	T/G	42	729988	+	NA	NA	NA	NA	NA	NA	K	T	T	K	G	N	K	T	G	T	K	T	T	T	N	K	T	K	K	K	T	K	T	T	K	K	T	T	K	T	K	G	G	T	T	T	K	T	K
S42_730496	T/G	42	730496	+	NA	NA	NA	NA	NA	NA	K	T	T	K	T	N	K	T	K	T	K	T	T	T	N	G	T	T	K	K	K	K	T	T	K	K	T	T	K	T	T	K	K	K	T	T	K	T	K
S42_741432	T/C	42	741432	+	NA	NA	NA	NA	NA	NA	C	T	T	Y	C	Y	Y	T	C	T	Y	T	T	T	C	T	T	Y	Y	Y	Y	Y	T	T	Y	Y	T	T	N	T	Y	C	Y	T	T	T	Y	N	Y
S42_803549	C/A	42	803549	+	NA	NA	NA	NA	NA	NA	C	C	C	M	N	C	M	C	M	C	M	C	C	C	N	M	C	M	C	M	C	M	C	C	M	M	C	C	C	C	M	C	C	M	C	C	M	C	M
S42_803650	A/G	42	803650	+	NA	NA	NA	NA	NA	NA	A	A	A	A	A	A	A	A	A	A	A	A	A	A	A	A	A	A	A	A	A	A	A	A	A	A	A	A	A	A	A	A	A	A	A	A	A	A	A
S42_836098	G/T	42	836098	+	NA	NA	NA	NA	NA	NA	K	G	G	K	K	T	K	G	K	G	K	G	G	G	G	T	G	K	G	K	G	K	G	G	K	K	G	G	T	G	K	K	T	G	G	G	G	G	K
S42_836201	A/G	42	836201	+	NA	NA	NA	NA	NA	NA	N	A	A	R	N	N	R	A	R	N	A	A	A	A	N	G	A	G	R	R	A	R	A	A	G	A	A	A	R	A	R	R	A	R	N	A	R	A	R
S42_860598	G/C	42	860598	+	NA	NA	NA	NA	NA	NA	S	G	G	S	S	S	S	G	S	G	S	G	G	G	G	S	G	S	S	S	G	S	G	G	S	S	G	G	S	G	S	C	S	S	G	G	S	G	S
S42_886023	T/A	42	886023	+	NA	NA	NA	NA	NA	NA	W	T	T	W	W	N	W	T	W	T	W	T	T	T	N	T	T	W	W	W	T	W	T	T	W	W	T	T	A	W	W	T	W	W	T	T	W	T	W
S42_911335	C/T	42	911335	+	NA	NA	NA	NA	NA	NA	C	C	C	Y	C	Y	Y	C	C	C	Y	C	C	C	C	T	C	Y	Y	Y	Y	Y	C	C	C	Y	C	C	C	C	Y	Y	N	Y	C	C	Y	C	Y
S42_911451	T/G	42	911451	+	NA	NA	NA	NA	NA	NA	K	T	T	T	N	G	K	T	K	T	K	T	T	T	N	G	T	G	T	K	T	K	T	T	K	K	T	T	G	G	K	G	K	T	T	T	T	T	K
S42_916164	G/C	42	916164	+	NA	NA	NA	NA	NA	NA	G	G	G	G	G	G	G	G	G	G	G	G	G	G	G	G	G	G	G	G	G	G	G	G	G	G	G	G	G	G	G	G	G	G	G	G	G	G	G
S42_919452	C/T	42	919452	+	NA	NA	NA	NA	NA	NA	N	C	C	Y	C	Y	Y	C	Y	C	C	C	C	C	T	Y	C	Y	C	Y	C	T	C	C	Y	Y	C	C	Y	Y	Y	Y	Y	Y	C	C	T	C	Y
S42_939028	G/T	42	939028	+	NA	NA	NA	NA	NA	NA	G	G	G	K	G	G	K	G	T	G	K	G	G	G	N	G	G	K	K	K	G	K	G	G	K	K	G	G	K	T	K	G	K	T	G	G	K	G	K
S42_1013036	G/A	42	1013036	+	NA	NA	NA	NA	NA	NA	R	G	G	R	R	R	R	G	R	G	R	G	G	G	R	R	G	R	R	R	G	R	G	G	R	R	G	G	R	R	R	R	R	R	G	G	R	G	R
S42_1018377	T/C	42	1018377	+	NA	NA	NA	NA	NA	NA	T	T	T	Y	C	C	Y	T	Y	T	Y	T	T	T	C	Y	T	Y	Y	Y	Y	Y	T	T	Y	Y	T	T	Y	Y	Y	Y	Y	Y	T	T	C	T	Y
S42_1024508	C/T	42	1024508	+	NA	NA	NA	NA	NA	NA	T	C	C	Y	Y	C	Y	C	Y	C	Y	C	C	C	N	Y	C	Y	Y	Y	C	Y	C	C	Y	Y	C	C	C	Y	Y	Y	Y	Y	C	C	Y	C	Y
S42_1039455	C/T	42	1039455	+	NA	NA	NA	NA	NA	NA	Y	C	C	Y	N	Y	Y	C	C	C	Y	C	C	C	C	N	C	C	Y	Y	C	Y	C	C	Y	Y	C	C	Y	C	C	Y	Y	Y	C	C	Y	C	Y
S42_1077522	G/A	42	1077522	+	NA	NA	NA	NA	NA	NA	G	G	G	R	G	G	R	G	G	G	R	G	G	G	N	G	G	N	R	R	R	R	G	G	R	G	N	G	N	R	G	G	G	R	G	G	R	N	R
S42_1082679	A/G	42	1082679	+	NA	NA	NA	NA	NA	NA	A	A	A	R	A	N	R	A	R	A	R	A	A	A	R	R	A	R	R	R	R	R	A	A	R	R	A	A	A	A	R	G	R	R	A	A	R	A	R
S42_1092469	C/T	42	1092469	+	NA	NA	NA	NA	NA	NA	Y	C	C	Y	T	Y	Y	C	Y	C	Y	C	C	C	T	Y	C	Y	Y	Y	C	Y	C	C	Y	Y	C	C	Y	Y	Y	Y	Y	Y	C	C	Y	C	Y
S42_1095944	C/T	42	1095944	+	NA	NA	NA	NA	NA	NA	N	C	C	C	N	C	C	C	C	C	T	C	C	C	N	N	N	Y	C	C	C	C	C	C	C	Y	C	C	C	C	T	Y	C	C	C	C	C	C	Y
S42_1096102	C/A	42	1096102	+	NA	NA	NA	NA	NA	NA	A	C	C	M	C	C	M	C	M	C	M	C	C	C	A	A	C	C	M	M	C	M	C	C	M	M	C	C	C	M	A	C	A	M	C	C	M	C	M
S42_1123531	G/T	42	1123531	+	NA	NA	NA	NA	NA	NA	G	G	K	G	N	G	G	G	G	G	G	G	G	G	G	G	G	G	G	G	G	G	G	G	G	G	G	G	G	G	G	G	G	G	G	G	G	G	G
S42_1126148	T/C	42	1126148	+	NA	NA	NA	NA	NA	NA	T	T	T	Y	N	C	T	T	Y	N	Y	T	T	T	T	T	T	T	Y	Y	Y	Y	T	T	Y	C	T	T	N	T	Y	T	Y	N	T	T	Y	T	T
S42_1134971	T/C	42	1134971	+	NA	NA	NA	NA	NA	NA	Y	T	T	Y	Y	Y	Y	T	Y	T	Y	T	T	T	Y	Y	T	Y	Y	Y	Y	Y	T	T	Y	Y	T	T	Y	Y	Y	Y	Y	Y	T	T	Y	T	Y
S42_1152925	A/C	42	1152925	+	NA	NA	NA	NA	NA	NA	M	A	A	M	M	M	M	A	M	A	M	A	A	A	N	M	A	M	M	M	M	M	A	A	M	M	A	A	M	M	M	M	M	A	A	A	M	A	M
S42_1153736	T/C	42	1153736	+	NA	NA	NA	NA	NA	NA	N	T	T	Y	C	C	Y	T	Y	T	Y	T	T	T	N	Y	T	C	Y	Y	Y	Y	T	T	C	Y	T	T	C	Y	Y	C	T	Y	T	T	Y	T	Y
S42_1153849	G/C	42	1153849	+	NA	NA	NA	NA	NA	NA	S	G	G	S	C	S	S	G	G	G	S	G	G	G	G	S	G	S	S	C	S	S	G	G	S	S	G	G	S	G	S	G	S	S	G	G	S	G	C
S42_1155977	T/C	42	1155977	+	NA	NA	NA	NA	NA	NA	Y	T	T	T	T	N	T	T	T	N	C	T	T	T	Y	T	T	T	T	T	T	T	T	T	T	Y	T	T	N	N	Y	Y	T	T	T	T	T	T	Y
S42_1160490	C/G	42	1160490	+	NA	NA	NA	NA	NA	NA	C	C	C	C	C	C	C	C	C	C	C	C	C	C	C	C	C	C	C	C	C	C	C	C	C	C	C	C	S	C	C	C	C	C	C	C	C	C	C
S42_1164029	G/A	42	1164029	+	NA	NA	NA	NA	NA	NA	R	G	G	R	G	A	R	G	R	G	R	G	G	G	A	N	G	A	R	R	R	R	G	G	R	R	G	R	R	R	R	R	R	G	G	G	R	G	R
S42_1192813	C/A	42	1192813	+	NA	NA	NA	NA	NA	NA	M	C	C	M	N	M	M	C	M	C	M	C	N	C	A	M	C	M	M	M	C	M	C	C	M	M	C	C	M	M	M	M	M	M	C	C	M	C	M
S42_1220390	C/G	42	1220390	+	NA	NA	NA	NA	NA	NA	S	C	C	S	S	G	S	C	S	C	S	C	C	C	N	S	C	G	S	S	C	S	C	C	S	S	C	C	N	G	S	G	C	S	C	C	S	C	S
S42_1245764	A/C	42	1245764	+	NA	NA	NA	NA	NA	NA	A	M	M	A	M	A	M	M	A	M	M	M	A	M	C	M	M	A	A	M	M	M	M	M	M	M	C	M	C	C	M	A	M	N	A	C	M	M	M
S43_106225	C/T	43	106225	+	NA	NA	NA	NA	NA	NA	Y	Y	Y	Y	Y	Y	Y	Y	Y	Y	Y	Y	Y	Y	C	Y	Y	Y	Y	Y	Y	Y	Y	Y	Y	Y	Y	Y	Y	C	Y	Y	Y	Y	Y	Y	Y	Y	Y
S43_149783	T/G	43	149783	+	NA	NA	NA	NA	NA	NA	T	K	T	T	T	T	K	K	T	K	K	K	K	K	K	T	T	K	T	K	K	T	T	K	T	T	T	T	K	K	T	K	T	T	K	T	K	T	T
S43_151108	G/A	43	151108	+	NA	NA	NA	NA	NA	NA	G	R	G	G	G	G	R	R	G	R	R	A	R	R	A	N	G	R	G	R	R	G	G	R	G	G	G	G	R	R	G	R	G	G	R	G	R	G	G
S43_154325	T/A	43	154325	+	NA	NA	NA	NA	NA	NA	T	W	T	T	T	N	W	W	T	W	W	W	W	W	A	T	T	W	T	W	W	T	T	W	T	T	T	T	W	W	T	W	T	T	W	T	W	T	T
S43_175672	C/T	43	175672	+	NA	NA	NA	NA	NA	NA	C	Y	C	C	C	C	Y	Y	C	Y	Y	Y	Y	Y	C	C	C	Y	C	Y	C	C	C	Y	C	C	C	C	Y	Y	C	Y	C	C	Y	C	Y	C	C
S43_175802	T/C	43	175802	+	NA	NA	NA	NA	NA	NA	T	Y	T	T	T	N	Y	Y	T	T	Y	Y	Y	Y	C	T	T	Y	T	Y	Y	T	T	Y	T	T	T	T	Y	T	T	Y	T	T	Y	T	Y	T	T
S43_175957	G/T	43	175957	+	NA	NA	NA	NA	NA	NA	G	G	G	G	N	G	G	T	G	G	K	G	G	G	N	G	G	G	G	G	G	G	G	K	G	G	G	G	G	G	G	K	G	G	K	G	G	G	G
S43_232886	A/G	43	232886	+	NA	NA	NA	NA	NA	NA	R	A	R	R	R	R	R	R	A	R	A	R	A	A	A	R	R	R	R	R	R	A	R	R	R	A	R	R	R	A	R	R	R	R	A	A	A	A	R
S43_234947	C/T	43	234947	+	NA	NA	NA	NA	NA	NA	Y	Y	Y	Y	Y	Y	Y	Y	Y	C	C	C	Y	C	C	Y	Y	C	Y	Y	Y	C	Y	Y	Y	Y	Y	Y	Y	Y	Y	C	C	Y	Y	Y	C	Y	C
S43_235978	T/A	43	235978	+	NA	NA	NA	NA	NA	NA	T	W	T	W	N	T	W	T	T	T	W	T	W	A	N	A	T	T	T	T	W	W	T	A	W	W	T	W	T	T	T	N	A	W	T	W	A	W	W
S43_246798	G/C	43	246798	+	NA	NA	NA	NA	NA	NA	G	S	G	G	G	G	G	G	G	G	G	S	G	S	S	G	G	S	G	S	S	G	G	G	G	G	G	G	G	G	G	G	G	G	G	G	S	G	G
S43_255209	T/C	43	255209	+	NA	NA	NA	NA	NA	NA	T	Y	T	T	T	T	Y	T	T	Y	Y	Y	C	T	N	T	T	Y	T	Y	N	T	T	Y	T	T	T	T	T	C	T	Y	T	T	Y	T	Y	T	T
S43_255433	A/G	43	255433	+	NA	NA	NA	NA	NA	NA	A	R	A	A	A	A	R	R	A	R	R	R	R	R	A	A	A	R	A	R	A	A	A	R	A	A	A	A	R	R	A	R	A	A	R	A	R	A	A
S43_263686	T/A	43	263686	+	NA	NA	NA	NA	NA	NA	T	W	T	T	N	N	W	W	T	A	W	W	W	W	N	T	T	W	T	W	T	T	T	W	T	T	T	T	W	T	T	W	T	T	W	T	W	T	T
S43_263788	C/T	43	263788	+	NA	NA	NA	NA	NA	NA	C	Y	C	C	C	C	Y	Y	C	Y	Y	Y	Y	Y	T	C	C	C	C	Y	T	C	C	T	C	C	C	C	N	N	C	C	C	C	Y	C	Y	C	C
S43_280663	T/A	43	280663	+	NA	NA	NA	NA	NA	NA	T	W	T	T	T	T	W	W	T	W	W	W	W	W	T	T	T	W	T	W	W	T	T	W	T	T	T	T	W	W	T	W	T	T	W	T	W	T	T
S43_280804	A/C	43	280804	+	NA	NA	NA	NA	NA	NA	A	M	A	A	A	A	M	M	A	M	M	M	M	M	M	A	A	M	A	M	M	A	A	M	A	A	A	A	M	M	A	M	A	A	M	A	M	A	A
S43_288221	C/T	43	288221	+	NA	NA	NA	NA	NA	NA	C	Y	C	C	C	C	Y	T	C	Y	Y	Y	Y	Y	Y	C	C	Y	C	Y	Y	C	C	Y	C	C	C	C	Y	Y	C	Y	C	C	Y	C	Y	C	C
S43_306868	G/C	43	306868	+	NA	NA	NA	NA	NA	NA	G	S	G	G	G	G	S	S	G	S	S	S	S	S	S	G	G	S	G	S	S	G	G	S	G	G	G	G	S	S	G	S	G	G	S	G	S	G	G
S43_318210	T/G	43	318210	+	NA	NA	NA	NA	NA	NA	T	K	T	T	T	T	K	K	T	G	K	K	K	K	K	T	T	K	T	K	K	T	T	K	T	T	T	T	K	K	T	K	T	T	K	T	K	T	T
S43_318317	G/A	43	318317	+	NA	NA	NA	NA	NA	NA	G	R	G	G	N	N	R	R	G	R	R	G	R	R	N	G	G	R	G	R	A	G	G	A	G	G	G	G	A	R	G	N	G	G	R	G	N	G	G
S43_324854	C/T	43	324854	+	NA	NA	NA	NA	NA	NA	C	Y	C	C	C	C	Y	Y	C	Y	Y	Y	Y	Y	C	C	C	Y	C	Y	Y	C	C	Y	C	C	C	C	Y	Y	C	Y	C	C	Y	C	Y	C	C
S43_380730	A/G	43	380730	+	NA	NA	NA	NA	NA	NA	A	R	A	A	A	A	R	R	A	R	R	A	R	R	R	A	A	A	A	R	R	A	A	R	A	A	A	A	R	R	A	G	A	A	R	A	R	A	A
S43_382307	G/T	43	382307	+	NA	NA	NA	NA	NA	NA	G	K	G	G	G	G	G	K	G	K	K	N	K	G	G	G	G	G	G	K	T	G	G	K	G	G	G	G	N	G	G	K	G	G	K	G	K	G	G
S43_384858	G/A	43	384858	+	NA	NA	NA	NA	NA	NA	G	G	G	G	G	G	R	G	G	G	G	R	R	R	G	G	G	R	G	G	G	G	G	G	G	G	G	G	R	A	G	R	G	G	G	G	G	G	G
S43_387857	T/G	43	387857	+	NA	NA	NA	NA	NA	NA	T	K	K	T	T	T	K	K	T	K	K	K	K	T	T	T	T	K	T	K	K	T	T	K	T	T	T	T	T	T	T	K	T	T	K	T	K	T	T
S43_405479	A/T	43	405479	+	NA	NA	NA	NA	NA	NA	N	W	A	A	A	A	W	W	A	T	W	W	W	A	N	A	A	W	A	W	A	A	A	W	A	A	A	A	T	A	A	T	A	A	T	A	W	A	A
S43_405617	C/A	43	405617	+	NA	NA	NA	NA	NA	NA	C	A	C	C	C	C	M	A	C	M	M	M	M	M	A	C	C	M	C	M	M	C	C	M	C	C	C	C	M	M	C	M	N	C	M	C	M	C	C
S43_405799	C/T	43	405799	+	NA	NA	NA	NA	NA	NA	C	Y	C	C	C	C	Y	C	C	Y	C	Y	Y	Y	C	C	C	Y	C	Y	Y	C	C	C	C	C	C	C	Y	Y	C	C	C	C	C	C	Y	C	C
S43_412735	G/A	43	412735	+	NA	NA	NA	NA	NA	NA	G	R	G	G	G	G	R	R	G	R	R	R	R	R	R	G	G	R	G	R	R	G	G	R	G	G	G	G	R	R	G	R	G	G	R	G	R	G	G
S43_448813	G/A	43	448813	+	NA	NA	NA	NA	NA	NA	G	R	G	G	G	G	R	R	G	R	R	R	R	R	G	G	G	R	G	R	R	G	G	R	G	G	G	G	R	G	G	R	G	G	R	G	R	G	G
S43_449887	A/G	43	449887	+	NA	NA	NA	NA	NA	NA	A	R	A	A	A	A	R	A	A	R	A	R	R	R	A	A	A	R	A	R	R	A	A	A	A	A	A	A	R	A	A	A	A	N	A	A	R	A	A
S43_450490	T/C	43	450490	+	NA	NA	NA	NA	NA	NA	T	Y	T	T	T	T	Y	Y	T	Y	Y	Y	Y	Y	T	T	T	Y	T	Y	Y	T	T	Y	T	T	T	T	Y	Y	T	Y	T	T	Y	T	Y	T	T
S43_507733	T/C	43	507733	+	NA	NA	NA	NA	NA	NA	T	Y	T	T	T	T	Y	Y	T	T	Y	Y	Y	Y	Y	T	T	Y	T	Y	Y	T	T	Y	T	T	T	T	Y	Y	T	C	T	T	Y	T	Y	T	T
S43_538392	C/T	43	538392	+	NA	NA	NA	NA	NA	NA	C	C	C	C	C	C	C	Y	C	C	Y	C	C	C	N	C	C	C	C	C	C	C	C	Y	C	C	C	C	C	C	C	Y	C	C	Y	C	C	C	C
S43_566786	A/T	43	566786	+	NA	NA	NA	NA	NA	NA	A	W	A	A	A	N	W	W	A	W	W	A	W	W	N	A	A	W	A	W	W	A	A	W	A	A	A	A	A	T	A	W	A	A	W	A	W	A	A
S43_574947	G/A	43	574947	+	NA	NA	NA	NA	NA	NA	N	R	G	G	G	N	A	R	G	R	A	G	R	R	G	G	G	N	G	R	G	G	G	G	G	G	G	G	A	N	G	R	G	G	R	G	R	G	G
S44_18903	T/C	44	18903	+	NA	NA	NA	NA	NA	NA	T	Y	T	Y	T	T	T	Y	T	Y	T	T	T	Y	T	T	T	Y	Y	T	Y	Y	Y	Y	Y	T	Y	T	Y	Y	T	T	Y	Y	Y	T	Y	N	T
S44_171030	T/C	44	171030	+	NA	NA	NA	NA	NA	NA	T	T	Y	T	T	T	T	T	T	T	T	T	T	T	N	T	T	T	T	T	T	T	T	T	T	T	T	T	N	T	T	T	T	T	T	T	T	N	T
S44_171144	G/A	44	171144	+	NA	NA	NA	NA	NA	NA	G	R	G	R	G	G	G	R	G	R	G	G	G	R	G	G	G	G	R	G	R	R	R	R	R	G	R	G	R	A	G	G	R	R	R	G	R	G	G
S45_47083	C/A	45	47083	+	NA	NA	NA	NA	NA	NA	N	C	C	C	C	C	M	C	N	C	M	C	C	C	N	C	A	C	C	C	A	C	M	M	C	N	A	C	C	C	C	C	N	N	M	M	C	A	C
S45_108594	G/C	45	108594	+	NA	NA	NA	NA	NA	NA	G	G	G	G	G	G	G	G	G	G	G	G	G	G	N	G	G	G	G	G	G	G	G	G	G	S	S	S	N	G	G	S	S	S	S	S	S	N	G
S45_108739	A/T	45	108739	+	NA	NA	NA	NA	NA	NA	A	A	A	A	A	A	W	A	W	A	W	A	A	A	A	A	W	A	W	A	W	A	W	W	A	W	W	W	A	A	A	W	W	W	W	W	W	W	A
S45_109488	T/A	45	109488	+	NA	NA	NA	NA	NA	NA	T	T	T	T	W	N	W	T	A	T	T	T	T	T	A	T	A	T	T	T	W	T	T	W	T	T	W	T	T	T	T	T	T	W	W	W	T	W	T
S45_120982	A/T	45	120982	+	NA	NA	NA	NA	NA	NA	A	A	A	A	T	A	W	A	A	A	W	A	A	A	N	A	W	A	W	A	A	A	W	N	A	W	T	W	A	A	A	W	W	W	A	W	W	A	A
S45_276750	A/C	45	276750	+	NA	NA	NA	NA	NA	NA	A	A	A	A	M	M	M	A	C	A	M	A	A	A	M	A	M	A	M	A	M	A	M	M	A	M	M	M	A	A	A	M	M	C	M	M	M	M	A
S45_334753	G/A	45	334753	+	NA	NA	NA	NA	NA	NA	G	G	G	G	R	A	R	G	R	N	R	G	G	G	N	G	R	G	A	G	G	G	R	R	G	R	R	A	N	G	G	R	R	A	R	R	R	R	G
S45_416488	A/C	45	416488	+	NA	NA	NA	NA	NA	NA	A	A	A	A	M	M	M	A	M	A	M	A	A	A	M	A	M	A	M	A	M	A	M	M	A	M	M	M	A	A	A	M	M	M	M	M	M	M	A
S45_458966	A	45	458966	+	NA	NA	NA	NA	NA	NA	A	A	A	A	A	A	A	A	A	A	A	A	A	A	A	A	A	A	A	A	A	A	A	A	A	A	A	A	A	A	A	A	A	A	A	A	A	A	A
S45_460971	C	45	460971	+	NA	NA	NA	NA	NA	NA	C	C	N	C	C	C	C	C	C	C	C	C	C	C	C	N	C	C	C	C	C	C	C	C	C	C	C	C	N	C	C	C	C	C	C	C	C	N	C
S45_496158	C/T	45	496158	+	NA	NA	NA	NA	NA	NA	C	C	C	C	Y	Y	Y	C	Y	C	Y	C	C	C	N	C	Y	C	Y	C	Y	C	Y	Y	C	Y	Y	Y	C	C	C	Y	Y	C	Y	Y	Y	Y	C
S45_496283	G/C	45	496283	+	NA	NA	NA	NA	NA	NA	G	G	G	G	N	N	S	G	S	G	G	G	G	G	N	G	G	G	G	G	C	G	S	G	G	G	S	S	G	G	G	G	C	C	G	S	C	G	G
S46_10737	T/A	46	10737	+	NA	NA	NA	NA	NA	NA	T	W	T	T	T	T	W	W	T	W	T	T	W	W	A	W	T	T	T	T	W	T	T	W	T	T	W	T	T	W	W	T	T	T	T	T	W	A	T
S46_14051	C/G	46	14051	+	NA	NA	NA	NA	NA	NA	N	S	C	C	S	C	S	S	C	G	C	C	S	S	N	G	C	C	C	C	C	C	C	C	C	C	S	C	N	G	C	N	C	C	C	C	S	G	C
S46_14184	G/A	46	14184	+	NA	NA	NA	NA	NA	NA	G	R	G	G	G	G	R	R	G	R	G	G	G	R	R	A	G	G	G	G	R	G	G	R	G	G	R	G	G	R	G	G	G	G	G	G	R	R	G
S46_14304	G/T	46	14304	+	NA	NA	NA	NA	NA	NA	G	K	G	G	K	N	K	K	G	G	G	G	K	K	N	K	G	N	G	G	G	G	G	K	G	G	K	G	G	K	K	G	G	G	G	G	K	T	G
S46_15472	T/C	46	15472	+	NA	NA	NA	NA	NA	NA	T	Y	T	T	Y	T	Y	Y	T	Y	T	T	Y	Y	Y	Y	T	T	T	T	T	T	T	Y	T	T	Y	T	T	Y	Y	T	T	T	T	T	Y	Y	T
S46_16612	T/A	46	16612	+	NA	NA	NA	NA	NA	NA	T	T	T	T	T	T	T	T	T	T	T	T	T	T	N	T	T	T	T	T	T	T	T	T	T	T	T	T	T	T	W	T	T	T	T	T	T	W	T
S46_55332	T/A	46	55332	+	NA	NA	NA	NA	NA	NA	T	W	T	T	W	T	W	W	T	W	T	T	W	W	W	W	T	T	T	T	W	T	T	W	T	T	W	T	T	W	W	T	W	T	T	T	W	W	T
S46_55506	T/C	46	55506	+	NA	NA	NA	NA	NA	NA	T	Y	T	T	T	T	Y	Y	T	Y	T	T	Y	Y	N	Y	T	T	T	T	Y	T	T	Y	T	T	Y	T	T	C	Y	T	Y	T	T	T	Y	Y	T
S46_123858	C/T	46	123858	+	NA	NA	NA	NA	NA	NA	C	C	C	C	C	C	C	C	C	C	C	C	C	C	C	C	C	C	C	C	C	C	C	C	C	C	C	C	C	C	C	C	C	C	C	C	C	C	C
S46_128897	T/C	46	128897	+	NA	NA	NA	NA	NA	NA	T	Y	T	T	Y	T	Y	Y	T	Y	T	T	Y	Y	T	Y	T	T	T	T	Y	T	T	Y	T	T	Y	T	T	Y	T	T	Y	T	T	T	Y	T	T
S46_129377	T/A	46	129377	+	NA	NA	NA	NA	NA	NA	T	W	T	T	N	T	W	W	T	W	T	T	W	W	N	T	T	T	T	T	T	T	T	W	T	T	W	T	N	W	W	T	W	T	T	T	W	W	T
S46_129478	A/T	46	129478	+	NA	NA	NA	NA	NA	NA	A	W	A	A	W	A	W	W	A	W	A	A	W	T	N	T	A	A	A	A	A	A	A	T	A	A	W	A	A	T	A	A	W	A	A	A	W	A	A
S46_134005	G/A	46	134005	+	NA	NA	NA	NA	NA	NA	G	R	G	G	R	G	R	R	G	R	G	G	R	R	R	R	G	G	G	G	R	G	G	R	G	G	R	G	G	R	R	G	R	G	G	G	R	R	G
S46_134387	T/C	46	134387	+	NA	NA	NA	NA	NA	NA	T	Y	T	T	T	T	Y	Y	T	Y	T	T	Y	Y	N	T	T	T	T	T	T	T	T	C	T	T	Y	T	T	C	Y	T	Y	T	T	T	Y	Y	T
S46_134520	A/T	46	134520	+	NA	NA	NA	NA	NA	NA	A	W	A	A	N	A	T	W	A	W	A	A	W	W	T	W	A	A	A	A	A	A	A	W	A	A	T	A	A	N	W	A	T	A	A	A	W	W	A
S46_158184	C/T	46	158184	+	NA	NA	NA	NA	NA	NA	C	Y	C	C	C	C	Y	Y	C	C	C	N	Y	Y	N	Y	C	C	C	C	Y	C	C	Y	C	C	C	C	C	Y	C	C	T	C	C	C	Y	C	C
S46_162323	G/A	46	162323	+	NA	NA	NA	NA	NA	NA	G	R	G	G	A	G	R	R	G	R	G	G	R	R	N	R	G	G	G	G	G	G	G	G	G	G	R	G	G	R	R	G	R	G	G	G	R	R	G
S46_163164	C/T	46	163164	+	NA	NA	NA	NA	NA	NA	C	Y	Y	C	Y	C	Y	Y	C	Y	C	C	Y	Y	Y	Y	C	C	C	C	Y	C	C	Y	C	C	Y	C	C	Y	Y	C	Y	C	C	C	Y	Y	C
S46_184406	C/T	46	184406	+	NA	NA	NA	NA	NA	NA	C	Y	C	C	T	C	Y	Y	C	Y	C	C	Y	Y	T	T	C	C	C	C	C	C	C	Y	C	C	Y	C	C	Y	Y	C	Y	C	C	C	Y	Y	C
S46_184528	T/C	46	184528	+	NA	NA	NA	NA	NA	NA	T	T	T	T	T	T	T	T	T	T	T	T	T	T	T	T	T	T	T	T	T	T	T	T	T	T	T	T	T	T	Y	T	T	T	T	T	T	C	T
S46_192317	C/G	46	192317	+	NA	NA	NA	NA	NA	NA	N	S	C	C	C	C	G	S	C	N	C	C	S	S	G	S	C	N	C	C	C	C	C	G	C	C	S	C	C	C	C	C	S	C	C	C	G	S	C
S46_192432	A/C	46	192432	+	NA	NA	NA	NA	NA	NA	A	M	A	A	N	N	M	M	A	M	A	A	M	M	N	M	A	A	A	A	M	A	A	M	A	A	A	A	A	A	A	A	M	A	A	A	M	A	A
S46_206699	G/A	46	206699	+	NA	NA	NA	NA	NA	NA	G	G	G	G	G	G	G	G	G	G	G	G	G	G	N	G	G	G	G	G	G	G	G	G	G	G	G	G	G	G	R	G	G	G	G	G	G	R	G
S46_251591	T/C	46	251591	+	NA	NA	NA	NA	NA	NA	T	Y	T	T	Y	T	Y	Y	T	Y	T	T	Y	Y	Y	Y	T	T	T	T	Y	T	T	T	T	T	Y	T	T	Y	Y	T	Y	T	T	T	Y	Y	T
S46_251699	A/G	46	251699	+	NA	NA	NA	NA	NA	NA	N	R	A	A	R	A	R	R	A	R	A	A	R	R	G	R	A	A	A	A	R	A	A	A	A	A	R	A	A	R	R	A	R	A	A	A	R	R	A
S46_265163	C/A	46	265163	+	NA	NA	NA	NA	NA	NA	C	M	C	C	M	C	M	M	C	M	C	C	M	M	M	M	C	C	C	C	M	C	C	C	C	C	M	C	C	M	M	C	M	C	C	C	M	M	C
S46_268530	G/C	46	268530	+	NA	NA	NA	NA	NA	NA	G	G	G	G	G	N	G	G	G	G	G	G	G	G	S	G	G	G	G	G	G	G	G	G	G	G	G	G	G	G	S	G	G	G	G	G	G	S	G
S46_272196	A/G	46	272196	+	NA	NA	NA	NA	NA	NA	A	R	A	A	G	A	R	R	A	A	A	A	R	R	N	R	A	A	A	A	R	A	A	A	A	A	R	A	A	R	R	A	R	A	A	A	R	A	A
S46_281310	C/T	46	281310	+	NA	NA	NA	NA	NA	NA	C	Y	C	C	Y	C	Y	Y	C	Y	C	C	Y	Y	Y	Y	C	C	C	C	Y	C	C	C	C	C	Y	C	C	Y	Y	C	Y	C	C	C	Y	Y	C
S46_287045	T/G	46	287045	+	NA	NA	NA	NA	NA	NA	T	T	T	T	T	T	T	T	T	T	T	T	T	T	K	T	T	T	T	T	T	T	T	T	T	T	T	T	T	T	K	T	T	T	T	T	T	K	T
S46_289757	A/T	46	289757	+	NA	NA	NA	NA	NA	NA	A	W	A	A	W	A	W	W	A	W	A	A	W	W	W	W	A	A	A	A	W	A	A	A	A	A	W	A	A	W	W	A	W	A	A	A	W	W	A
S46_290260	T/C	46	290260	+	NA	NA	NA	NA	NA	NA	T	Y	T	T	N	T	C	T	T	Y	T	T	Y	Y	N	T	T	T	T	T	T	T	T	T	T	T	Y	T	N	C	Y	T	Y	T	T	T	Y	C	T
S46_290366	T/A	46	290366	+	NA	NA	NA	NA	NA	NA	T	T	T	T	N	T	T	T	N	T	T	T	T	T	A	T	T	T	N	T	T	T	T	T	T	T	T	T	T	T	W	T	T	T	T	T	T	W	T
S46_314945	C/A	46	314945	+	NA	NA	NA	NA	NA	NA	N	M	C	C	C	C	A	C	C	N	C	C	C	M	N	M	C	C	C	C	C	C	C	N	C	C	C	C	C	M	C	C	M	C	C	C	A	C	C
S46_316222	G/A	46	316222	+	NA	NA	NA	NA	NA	NA	G	R	G	G	N	G	G	R	G	R	G	G	R	R	N	A	G	G	G	G	R	G	G	G	G	G	R	G	G	R	G	G	G	N	G	G	R	G	G
S46_316353	T/C	46	316353	+	NA	NA	NA	NA	NA	NA	T	T	T	T	N	T	T	T	T	T	T	T	T	T	T	T	T	T	T	T	T	T	T	T	T	T	T	T	T	T	T	T	T	T	T	T	T	T	T
S46_317380	G/A	46	317380	+	NA	NA	NA	NA	NA	NA	G	G	G	G	G	G	G	G	G	G	G	G	G	G	N	G	G	G	G	G	G	G	G	G	G	G	G	G	G	G	R	G	G	G	G	G	G	R	G
S46_321693	T/G	46	321693	+	NA	NA	NA	NA	NA	NA	T	K	T	T	K	T	K	K	T	K	T	T	K	K	T	K	T	T	T	T	T	T	T	T	T	T	K	T	T	K	T	T	G	T	T	T	K	T	T
S46_403307	A/C	46	403307	+	NA	NA	NA	NA	NA	NA	A	A	A	A	N	A	A	A	A	N	A	A	A	A	C	A	A	A	A	A	A	A	A	A	A	A	A	A	A	A	M	A	A	A	A	A	A	M	A
S46_403427	A/C	46	403427	+	NA	NA	NA	NA	NA	NA	A	M	A	A	N	A	M	M	A	M	A	A	M	M	M	M	A	A	A	A	A	A	A	A	A	A	M	N	A	M	M	A	M	A	A	A	M	M	A
S46_405967	G/A	46	405967	+	NA	NA	NA	NA	NA	NA	G	R	G	G	R	G	G	R	G	R	G	G	R	R	G	R	G	N	G	G	G	G	G	G	G	G	R	G	G	G	G	G	R	G	G	G	R	G	G
S46_406697	T/C	46	406697	+	NA	NA	NA	NA	NA	NA	T	Y	T	T	Y	T	Y	Y	T	Y	T	T	Y	Y	N	Y	T	T	T	T	Y	T	T	T	T	T	Y	T	T	Y	Y	T	Y	T	T	T	Y	Y	T
S46_406807	T/A	46	406807	+	NA	NA	NA	NA	NA	NA	T	W	T	T	W	T	W	W	T	W	T	T	T	W	A	W	T	T	T	T	W	T	T	T	T	T	W	T	T	T	W	T	W	T	T	T	W	W	T
S46_415811	A/G	46	415811	+	NA	NA	NA	NA	NA	NA	A	R	A	A	A	A	R	R	A	R	A	A	R	R	R	A	A	A	A	A	A	A	A	A	A	A	R	A	A	A	R	A	R	A	A	A	R	R	A
S46_425551	G/C	46	425551	+	NA	NA	NA	NA	NA	NA	G	C	G	G	C	G	C	S	N	S	G	G	S	C	C	S	G	G	G	G	G	G	G	G	G	G	S	G	N	C	S	G	S	N	G	G	C	C	G
S46_447664	G/A	46	447664	+	NA	NA	NA	NA	NA	NA	G	R	G	G	G	G	R	R	G	R	G	G	R	R	G	R	G	G	G	G	R	G	G	G	G	G	R	G	G	R	R	G	R	G	G	G	R	R	G
S46_449288	T/G	46	449288	+	NA	NA	NA	NA	NA	NA	T	T	T	T	T	T	T	T	T	T	T	T	T	T	G	T	T	T	T	T	T	T	T	T	T	T	T	T	T	T	K	T	T	T	T	T	T	K	T
S46_462243	T/C	46	462243	+	NA	NA	NA	NA	NA	NA	T	T	T	T	N	N	T	T	T	T	T	T	T	T	N	T	T	T	T	T	T	T	T	T	T	T	T	T	T	T	Y	T	T	T	T	T	T	C	T
S46_462374	T/A	46	462374	+	NA	NA	NA	NA	NA	NA	T	T	T	T	T	T	T	T	T	T	T	T	T	T	N	T	T	T	T	T	T	T	T	T	T	T	T	T	T	T	W	T	T	N	T	T	T	W	T
S46_468626	A/T	46	468626	+	NA	NA	NA	NA	NA	NA	A	W	A	A	W	A	W	W	A	W	A	A	W	W	T	W	A	A	A	A	A	A	A	A	A	A	W	A	A	W	W	A	W	A	A	A	W	W	A
S46_488624	G/T	46	488624	+	NA	NA	NA	NA	NA	NA	G	K	G	G	K	G	K	K	G	K	G	G	G	K	N	T	G	G	G	G	G	G	G	G	G	G	K	G	N	G	K	G	K	G	G	G	K	K	G
S46_488730	C/T	46	488730	+	NA	NA	NA	NA	NA	NA	C	Y	C	C	T	C	Y	Y	C	Y	C	C	T	Y	N	Y	C	C	C	C	C	C	C	C	C	C	Y	C	C	Y	Y	C	T	C	C	C	Y	Y	C
S46_499255	T/C	46	499255	+	NA	NA	NA	NA	NA	NA	T	Y	Y	T	Y	T	Y	Y	T	Y	T	T	Y	Y	Y	Y	T	T	T	T	T	T	T	T	T	T	Y	T	T	Y	Y	T	Y	T	T	T	Y	Y	T
S46_509300	C/T	46	509300	+	NA	NA	NA	NA	NA	NA	C	Y	C	C	C	C	C	Y	C	T	C	C	Y	Y	N	Y	C	C	C	C	C	C	C	C	C	C	Y	C	C	Y	C	N	Y	C	C	C	Y	C	C
S46_511105	G/A	46	511105	+	NA	NA	NA	NA	NA	NA	G	G	G	G	G	G	R	G	G	G	G	G	G	G	G	R	G	G	G	G	G	G	G	G	G	G	G	G	G	G	G	G	G	G	G	G	G	G	G
S46_527320	A/T	46	527320	+	NA	NA	NA	NA	NA	NA	A	A	A	A	A	A	A	A	A	A	A	A	A	A	W	A	A	A	A	A	A	A	A	A	A	A	A	A	A	A	W	A	A	A	A	A	A	W	A
S46_531644	C/G	46	531644	+	NA	NA	NA	NA	NA	NA	C	C	C	C	N	C	C	C	C	C	C	C	C	C	S	C	C	C	C	C	C	C	C	C	C	C	C	C	C	C	S	C	C	C	C	C	C	S	C
S46_537673	C/G	46	537673	+	NA	NA	NA	NA	NA	NA	C	S	C	C	S	C	C	S	C	S	C	C	S	S	N	S	C	C	C	C	S	C	C	C	C	C	S	C	N	G	S	C	S	C	C	C	S	S	C
S46_538328	C/T	46	538328	+	NA	NA	NA	NA	NA	NA	N	Y	C	C	Y	N	Y	Y	C	Y	C	C	Y	Y	N	T	C	C	C	C	Y	C	C	C	C	C	Y	C	C	C	Y	C	T	N	C	C	C	Y	C
S46_539360	C/T	46	539360	+	NA	NA	NA	NA	NA	NA	C	Y	C	C	Y	C	Y	Y	C	Y	C	C	Y	Y	Y	Y	C	C	C	C	C	C	C	C	C	C	Y	C	C	Y	Y	C	Y	C	C	C	Y	Y	C
S46_540044	A/G	46	540044	+	NA	NA	NA	NA	NA	NA	A	R	A	A	A	A	R	R	A	R	R	R	R	A	A	A	A	A	A	R	A	A	A	R	A	A	R	A	A	A	A	R	A	A	R	A	R	A	A
S46_574837	A/C	46	574837	+	NA	NA	NA	NA	NA	NA	A	M	A	A	A	A	M	A	A	M	A	A	M	M	M	M	A	A	A	A	M	A	A	A	A	A	M	A	A	M	M	A	M	A	A	A	M	M	A
S46_575704	T/C	46	575704	+	NA	NA	NA	NA	NA	NA	T	Y	T	T	Y	T	Y	Y	T	Y	T	T	Y	Y	Y	Y	T	T	T	T	T	T	T	T	T	T	Y	T	T	Y	Y	T	Y	T	T	T	Y	Y	T
S46_591519	C/T	46	591519	+	NA	NA	NA	NA	NA	NA	C	Y	C	C	Y	N	Y	T	C	Y	C	C	Y	Y	N	Y	C	C	C	C	C	C	C	C	C	C	Y	C	C	C	Y	C	Y	C	C	C	Y	Y	C
S46_591621	G/A	46	591621	+	NA	NA	NA	NA	NA	NA	N	A	G	G	N	G	R	R	G	A	G	G	A	A	A	R	G	G	G	G	R	G	G	G	G	G	R	G	G	R	R	G	R	G	G	G	A	R	G
S46_591726	A/G	46	591726	+	NA	NA	NA	NA	NA	NA	A	A	A	A	R	A	A	R	A	A	A	A	A	A	A	A	A	A	A	A	A	A	A	A	A	A	A	A	A	A	A	A	A	A	A	A	A	A	A
S46_613426	T/C	46	613426	+	NA	NA	NA	NA	NA	NA	T	Y	T	T	T	T	Y	T	T	Y	T	T	Y	Y	Y	Y	T	T	T	T	T	T	T	T	T	T	Y	T	T	Y	Y	T	Y	T	T	T	Y	Y	T
S46_618315	A/G	46	618315	+	NA	NA	NA	NA	NA	NA	A	R	A	A	R	A	R	R	A	R	A	A	R	R	R	R	A	A	A	A	R	A	A	A	A	A	R	A	A	R	R	A	R	A	A	A	R	R	A
S46_627646	A/G	46	627646	+	NA	NA	NA	NA	NA	NA	A	R	A	A	R	A	R	R	A	R	A	A	R	R	R	R	A	A	A	A	R	A	A	A	A	A	R	A	A	R	A	A	R	A	A	A	R	A	A
S46_633444	A/T	46	633444	+	NA	NA	NA	NA	NA	NA	A	W	A	A	T	A	W	W	A	A	A	A	W	W	T	W	A	A	A	A	W	A	A	A	A	A	W	A	A	T	W	A	A	A	A	A	W	T	A
S46_652031	C/A	46	652031	+	NA	NA	NA	NA	NA	NA	C	M	C	C	C	C	M	C	C	M	C	C	C	M	C	M	C	C	C	C	N	C	C	C	C	C	A	C	C	M	M	C	A	C	C	C	M	M	C
S46_652131	A/T	46	652131	+	NA	NA	NA	NA	NA	NA	N	A	A	A	A	N	A	W	A	A	A	A	A	A	N	A	A	A	A	A	A	A	A	A	A	A	A	A	N	A	A	N	A	A	A	A	A	A	A
S46_652231	T/C	46	652231	+	NA	NA	NA	NA	NA	NA	T	Y	T	T	Y	N	Y	Y	T	Y	T	T	Y	Y	T	T	T	T	T	T	Y	T	T	T	T	T	Y	T	T	Y	Y	T	Y	T	T	T	Y	Y	T
S46_709261	G/T	46	709261	+	NA	NA	NA	NA	NA	NA	G	K	G	G	K	G	K	K	G	T	G	G	G	G	T	G	G	G	G	G	G	G	G	G	G	G	G	G	N	K	K	N	K	G	G	G	K	K	G
S46_709484	T/C	46	709484	+	NA	NA	NA	NA	NA	NA	T	T	T	T	C	N	T	C	T	N	T	T	T	N	T	T	T	N	T	T	T	T	T	T	T	T	T	T	T	T	N	T	T	T	T	T	T	T	T
S46_716277	C/T	46	716277	+	NA	NA	NA	NA	NA	NA	C	C	C	C	C	C	C	C	C	C	C	C	C	C	C	Y	C	C	C	C	C	C	C	C	C	C	C	C	C	Y	C	C	C	C	C	C	C	C	C
S46_716429	T/G	46	716429	+	NA	NA	NA	NA	NA	NA	N	K	T	T	K	T	K	K	T	N	T	T	G	G	G	N	T	T	T	T	G	T	T	T	T	T	K	T	N	T	K	T	K	T	T	T	K	K	T
S46_720787	A/C	46	720787	+	NA	NA	NA	NA	NA	NA	A	M	A	A	A	N	M	A	A	M	A	A	M	M	M	A	A	A	A	A	M	A	A	A	A	A	M	A	A	N	M	A	M	A	A	A	M	A	A
S46_731198	C/G	46	731198	+	NA	NA	NA	NA	NA	NA	C	S	C	C	N	N	C	C	C	S	C	C	S	C	N	S	C	C	C	C	S	C	C	C	C	C	S	C	C	C	C	C	S	C	C	C	S	G	C
S46_736975	G/T	46	736975	+	NA	NA	NA	NA	NA	NA	G	K	G	G	K	G	K	K	G	K	G	G	K	G	K	K	G	G	G	G	K	G	G	G	G	G	K	G	G	G	K	G	G	G	G	G	K	K	G
S46_746659	T/C	46	746659	+	NA	NA	NA	NA	NA	NA	T	Y	T	T	T	T	Y	T	T	Y	T	T	Y	Y	C	Y	T	T	T	T	Y	T	T	T	T	T	Y	T	T	Y	Y	T	Y	T	T	T	Y	Y	T
S46_760848	A/G	46	760848	+	NA	NA	NA	NA	NA	NA	A	R	A	A	R	A	R	R	A	R	A	A	R	R	N	R	A	A	A	A	A	A	A	A	A	A	R	A	A	R	R	A	R	A	A	A	A	A	A
S46_762088	G/A	46	762088	+	NA	NA	NA	NA	NA	NA	G	R	G	G	G	G	R	G	G	R	G	G	R	R	N	R	G	G	G	G	R	G	G	G	G	G	R	G	G	R	R	G	R	G	G	G	R	R	G
S46_834162	T/A	46	834162	+	NA	NA	NA	NA	NA	NA	T	W	T	T	A	T	W	W	T	W	T	T	W	W	W	T	T	T	T	T	W	T	T	T	T	T	W	T	T	W	W	T	W	T	T	T	W	W	T
S46_852939	A/G	46	852939	+	NA	NA	NA	NA	NA	NA	N	R	A	A	A	N	R	R	A	R	A	A	A	A	G	R	A	A	A	A	R	A	A	A	A	A	R	A	A	R	R	A	R	A	A	A	R	R	A
S46_867288	T/C	46	867288	+	NA	NA	NA	NA	NA	NA	T	T	T	T	Y	T	T	Y	T	T	T	T	T	T	T	T	T	T	T	T	T	T	T	T	T	T	T	T	T	T	T	T	T	T	T	T	T	T	T
S46_879090	A/T	46	879090	+	NA	NA	NA	NA	NA	NA	A	A	A	A	W	A	A	W	A	A	A	A	A	A	A	A	A	A	A	A	A	A	A	A	A	A	A	A	A	A	A	A	A	A	A	A	A	A	A
S46_880487	A/C	46	880487	+	NA	NA	NA	NA	NA	NA	A	M	A	A	A	A	M	A	A	M	A	A	M	M	M	M	A	A	A	A	M	A	A	A	A	A	M	A	A	M	M	A	M	A	A	A	M	M	A
S46_890995	G/A	46	890995	+	NA	NA	NA	NA	NA	NA	N	R	G	G	G	G	R	G	G	R	G	G	R	G	G	R	G	G	G	G	N	G	G	G	G	G	G	G	G	R	A	G	R	G	G	G	R	G	G
S46_903010	A/C	46	903010	+	NA	NA	NA	NA	NA	NA	A	M	A	A	A	N	M	A	A	M	A	A	A	A	N	A	A	A	A	A	M	A	A	A	A	A	A	A	N	N	M	N	C	A	A	A	M	A	A
S46_905849	A/T	46	905849	+	NA	NA	NA	NA	NA	NA	A	A	A	A	W	A	A	W	A	A	A	A	A	A	A	A	A	A	A	A	A	A	A	A	A	A	A	A	A	A	A	A	A	A	A	A	A	A	A
S46_911237	C/A	46	911237	+	NA	NA	NA	NA	NA	NA	C	M	C	C	C	C	M	C	C	M	C	C	M	M	A	A	C	C	C	C	C	C	C	C	C	C	M	C	C	M	M	C	M	C	C	C	M	M	C
S46_923707	T/C	46	923707	+	NA	NA	NA	NA	NA	NA	T	Y	T	T	T	T	T	T	T	Y	T	T	T	Y	N	Y	T	T	T	T	Y	T	T	T	T	T	Y	T	T	Y	Y	T	Y	T	T	T	Y	Y	T
S46_926357	C/A	46	926357	+	NA	NA	NA	NA	NA	NA	C	M	C	C	C	N	M	M	C	A	C	C	M	M	N	A	C	C	C	C	N	C	C	C	C	C	M	C	C	A	M	C	M	C	C	C	A	M	C
S46_943274	T/C	46	943274	+	NA	NA	NA	NA	NA	NA	N	Y	T	T	Y	T	Y	Y	T	Y	T	T	C	Y	T	Y	T	T	T	T	Y	T	T	T	T	T	Y	T	T	Y	Y	T	Y	T	T	T	Y	C	T
S46_943438	A/T	46	943438	+	NA	NA	NA	NA	NA	NA	A	W	A	A	A	A	W	A	A	A	A	A	W	W	N	T	A	A	A	A	W	A	A	A	A	A	W	A	A	W	W	A	W	A	A	A	W	W	A
S46_945742	A/C	46	945742	+	NA	NA	NA	NA	NA	NA	A	M	A	A	N	A	M	M	A	N	A	A	M	M	N	C	A	A	N	A	M	A	A	A	A	A	M	A	A	M	M	A	C	A	A	A	A	C	A
S46_959998	C/T	46	959998	+	NA	NA	NA	NA	NA	NA	C	Y	C	C	C	N	T	Y	C	T	C	N	T	C	N	T	N	C	C	C	Y	C	C	C	C	C	Y	C	C	T	Y	C	Y	N	C	C	T	C	C
S46_960923	G/A	46	960923	+	NA	NA	NA	NA	NA	NA	G	R	G	G	G	N	R	R	G	G	G	N	G	R	G	R	N	G	G	G	R	G	G	G	G	G	N	G	G	R	R	G	A	G	G	G	A	G	G
S46_966216	A/G	46	966216	+	NA	NA	NA	NA	NA	NA	A	R	A	A	A	A	R	A	A	R	A	A	R	R	R	R	A	A	A	A	R	A	A	A	A	A	R	A	A	R	R	A	R	A	A	A	R	A	A
S46_989729	C/G	46	989729	+	NA	NA	NA	NA	NA	NA	N	S	C	C	C	N	G	S	C	C	C	C	G	C	N	N	C	C	C	C	S	C	C	C	C	C	N	C	C	S	S	C	S	C	C	C	S	C	C
S46_989894	C/G	46	989894	+	NA	NA	NA	NA	NA	NA	C	S	N	C	C	N	C	C	C	C	C	C	S	S	N	N	C	C	C	C	S	C	C	C	C	C	S	C	C	S	S	C	S	N	C	C	N	S	C
S46_1004429	C/T	46	1004429	+	NA	NA	NA	NA	NA	NA	C	Y	C	C	Y	C	Y	Y	C	Y	C	C	Y	Y	C	Y	C	C	C	C	Y	C	C	C	C	C	Y	C	C	Y	Y	C	Y	C	C	C	Y	Y	C
S46_1016166	A/G	46	1016166	+	NA	NA	NA	NA	NA	NA	A	R	A	A	A	A	R	R	A	R	A	A	R	R	N	R	A	A	A	A	R	A	A	A	A	A	R	A	A	A	R	A	R	A	A	A	R	A	A
S46_1018518	C/T	46	1018518	+	NA	NA	NA	NA	NA	NA	C	Y	C	C	Y	C	Y	Y	C	Y	C	C	Y	Y	T	Y	C	C	C	C	Y	C	C	C	C	C	Y	C	C	Y	Y	C	Y	C	C	C	Y	Y	C
S46_1029896	C/T	46	1029896	+	NA	NA	NA	NA	NA	NA	C	Y	C	C	N	N	Y	C	C	Y	C	C	Y	Y	T	Y	C	C	C	C	Y	C	C	C	C	C	Y	C	C	C	Y	C	Y	C	C	C	Y	Y	C
S46_1034375	G/T	46	1034375	+	NA	NA	NA	NA	NA	NA	G	K	G	G	G	G	K	K	G	K	G	G	K	K	N	T	G	G	G	G	K	G	G	G	G	G	K	G	G	K	K	G	K	G	G	G	K	K	G
S46_1058803	A/T	46	1058803	+	NA	NA	NA	NA	NA	NA	A	A	A	A	T	A	A	A	A	W	A	A	N	W	N	A	A	A	A	A	W	A	A	A	A	A	T	A	N	A	W	A	A	A	A	A	W	W	A
S46_1059123	T/A	46	1059123	+	NA	NA	NA	NA	NA	NA	T	W	T	T	A	T	W	W	T	T	T	T	W	T	T	W	T	T	T	T	W	T	T	T	T	T	W	T	T	W	T	T	W	T	T	T	W	T	T
S46_1059239	T/A	46	1059239	+	NA	NA	NA	NA	NA	NA	T	A	T	T	N	T	W	T	T	A	T	T	A	W	N	N	T	T	T	T	W	T	T	T	T	T	W	N	T	T	W	T	A	T	T	T	W	W	T
S46_1062190	T/C	46	1062190	+	NA	NA	NA	NA	NA	NA	T	Y	T	T	T	T	Y	Y	T	Y	T	T	Y	Y	N	C	T	T	T	T	Y	T	T	T	T	T	Y	T	T	C	Y	T	Y	T	T	T	Y	C	T
S46_1143412	T/C	46	1143412	+	NA	NA	NA	NA	NA	NA	T	Y	T	T	T	T	Y	T	T	Y	T	T	Y	Y	Y	Y	T	T	T	T	Y	T	T	T	T	T	Y	T	T	Y	Y	T	Y	T	T	T	Y	Y	T
S46_1206676	G/T	46	1206676	+	NA	NA	NA	NA	NA	NA	G	G	G	G	G	G	G	G	G	G	G	G	G	G	N	G	G	G	G	G	G	G	G	G	G	G	G	G	G	G	G	G	G	G	G	G	G	G	G
S46_1206860	T/A	46	1206860	+	NA	NA	NA	NA	NA	NA	T	T	W	T	T	T	T	W	T	T	T	T	T	T	T	T	T	T	T	T	T	T	T	T	T	T	T	T	T	T	T	T	T	T	T	T	T	T	T
S46_1206977	G/T	46	1206977	+	NA	NA	NA	NA	NA	NA	G	K	G	G	K	G	K	K	G	K	G	G	K	K	K	K	G	G	G	G	K	G	G	G	G	G	K	G	G	K	K	G	K	G	G	G	K	K	G
S46_1210856	A/G	46	1210856	+	NA	NA	NA	NA	NA	NA	A	R	A	A	A	A	R	A	A	R	A	A	R	R	G	R	A	A	A	A	R	A	A	A	A	A	R	A	A	R	R	A	R	A	A	A	R	R	A
S46_1212618	C/G	46	1212618	+	NA	NA	NA	NA	NA	NA	C	S	C	C	N	N	S	S	C	S	C	C	S	S	S	S	C	C	C	C	G	C	C	C	C	C	S	C	C	S	S	C	S	C	C	C	S	C	C
S46_1212751	A/G	46	1212751	+	NA	NA	NA	NA	NA	NA	A	R	N	A	R	N	A	A	A	R	A	N	A	G	G	G	A	A	A	A	R	A	A	A	A	A	R	A	N	G	R	A	G	N	A	A	R	A	A
S46_1240872	A/T	46	1240872	+	NA	NA	NA	NA	NA	NA	A	W	A	A	N	A	W	N	A	W	A	A	W	W	A	T	A	A	A	A	W	A	A	A	A	A	T	A	N	W	W	A	W	A	A	A	T	W	A
S46_1240979	T/G	46	1240979	+	NA	NA	NA	NA	NA	NA	T	K	T	T	N	T	K	K	T	K	T	T	T	K	G	N	T	T	T	T	G	T	T	T	T	T	G	T	T	T	K	T	G	T	T	T	K	K	T
S46_1272580	T/C	46	1272580	+	NA	NA	NA	NA	NA	NA	T	Y	T	T	C	T	Y	Y	T	T	T	T	Y	Y	N	C	T	T	T	T	C	T	T	T	T	T	Y	T	N	Y	Y	T	C	T	T	T	T	C	T
S46_1332012	G/T	46	1332012	+	NA	NA	NA	NA	NA	NA	G	G	G	G	G	N	G	G	G	G	T	G	G	G	N	N	G	N	G	K	G	G	K	G	G	K	K	K	G	G	G	G	G	G	K	G	T	G	G
S46_1332114	G/A	46	1332114	+	NA	NA	NA	NA	NA	NA	G	G	G	G	R	N	R	G	G	G	R	G	G	G	N	G	G	G	N	G	G	G	R	G	G	R	R	R	G	G	G	G	G	G	G	R	R	G	G
S46_1342231	T/A	46	1342231	+	NA	NA	NA	NA	NA	NA	T	T	T	T	W	T	W	T	T	T	W	T	T	T	T	T	T	W	T	W	T	T	W	T	T	W	W	W	T	T	T	T	T	T	W	W	W	T	T
S46_1343641	G/T	46	1343641	+	NA	NA	NA	NA	NA	NA	G	G	G	G	N	N	K	G	G	G	K	G	G	G	N	G	G	G	G	K	K	G	K	G	G	T	T	K	G	G	G	G	G	G	K	G	T	G	G
S46_1356925	G/T	46	1356925	+	NA	NA	NA	NA	NA	NA	G	G	G	G	T	G	K	G	G	G	K	G	G	G	G	G	G	K	G	K	G	G	K	G	G	K	K	K	G	G	G	G	G	G	K	K	K	G	G
S46_1369785	A/G	46	1369785	+	NA	NA	NA	NA	NA	NA	A	A	A	A	R	A	R	A	A	A	R	A	A	A	A	A	A	R	A	R	R	A	R	A	A	R	R	R	A	A	A	A	A	A	R	R	R	A	A
S46_1375268	T/C	46	1375268	+	NA	NA	NA	NA	NA	NA	T	T	T	T	C	T	Y	T	T	T	Y	T	T	T	T	T	T	T	T	Y	T	T	Y	T	T	Y	Y	Y	T	T	T	T	T	T	Y	Y	Y	T	T
S46_1382560	T/A	46	1382560	+	NA	NA	NA	NA	NA	NA	T	T	W	T	N	T	T	T	T	T	T	T	T	T	T	T	T	T	T	T	T	T	T	T	T	T	T	T	T	T	T	T	T	T	T	T	T	T	T
S46_1398214	T/A	46	1398214	+	NA	NA	NA	NA	NA	NA	T	T	T	T	W	T	W	T	T	T	W	T	T	T	T	T	T	W	T	W	T	T	W	T	T	W	W	W	T	T	T	T	T	T	W	W	W	T	T
S46_1426141	C/T	46	1426141	+	NA	NA	NA	NA	NA	NA	C	C	C	C	Y	C	Y	C	C	C	Y	C	C	C	N	C	C	Y	C	Y	Y	C	Y	C	C	C	Y	N	N	C	C	C	C	C	Y	Y	Y	C	C
S46_1426325	T/G	46	1426325	+	NA	NA	NA	NA	NA	NA	T	T	N	T	G	N	T	T	T	T	G	T	T	T	T	T	T	K	T	K	K	T	K	T	T	K	K	G	N	T	T	T	T	T	K	K	K	T	T
S46_1431822	A/T	46	1431822	+	NA	NA	NA	NA	NA	NA	N	A	A	A	T	A	W	A	A	A	A	A	A	A	N	A	A	W	A	W	A	A	A	A	A	W	W	A	A	A	A	A	A	A	A	W	W	A	A
S46_1431956	G/T	46	1431956	+	NA	NA	NA	NA	NA	NA	G	G	G	G	N	G	G	G	G	G	K	G	G	G	G	G	G	G	G	K	G	G	G	G	G	K	K	K	N	G	G	G	G	G	K	K	K	G	G
S46_1432086	C/G	46	1432086	+	NA	NA	NA	NA	NA	NA	C	C	C	C	N	C	S	C	C	C	S	N	C	C	C	C	C	G	C	S	C	C	S	C	C	G	S	S	C	C	C	C	C	C	S	S	S	C	C
S46_1442435	A/G	46	1442435	+	NA	NA	NA	NA	NA	NA	A	A	A	A	G	A	A	A	A	A	R	A	A	A	A	A	A	A	A	R	A	A	R	A	A	R	R	R	A	A	A	A	A	A	R	R	R	A	A
S46_1450040	C/T	46	1450040	+	NA	NA	NA	NA	NA	NA	C	C	C	C	T	C	C	C	C	C	C	N	C	C	N	C	C	C	C	C	C	C	C	C	C	C	C	C	C	C	C	C	C	C	C	C	C	C	C
S46_1474398	T/C	46	1474398	+	NA	NA	NA	NA	NA	NA	T	T	T	T	N	T	N	T	T	T	Y	T	T	T	T	N	T	T	T	T	Y	T	Y	T	T	T	N	Y	N	N	T	T	T	T	Y	Y	Y	T	T
S46_1490441	C/G	46	1490441	+	NA	NA	NA	NA	NA	NA	C	C	C	C	N	C	S	C	C	N	S	C	C	C	N	C	C	S	C	S	C	C	S	C	C	S	S	C	C	C	C	C	C	C	S	S	S	C	C
S46_1496198	T/C	46	1496198	+	NA	NA	NA	NA	NA	NA	T	T	T	T	Y	T	C	T	T	N	Y	T	T	T	N	T	T	C	T	Y	T	T	Y	T	T	Y	Y	Y	T	T	N	T	T	T	Y	Y	Y	T	T
S46_1517671	T/A	46	1517671	+	NA	NA	NA	NA	NA	NA	T	T	T	T	W	T	W	T	T	T	W	T	T	T	T	T	T	W	T	W	T	T	W	T	T	W	W	W	T	T	T	T	T	T	W	W	W	T	T
S46_1530409	G/A	46	1530409	+	NA	NA	NA	NA	NA	NA	G	G	G	G	R	G	R	G	G	G	R	G	G	G	N	G	G	G	G	R	G	G	R	G	G	R	R	R	G	G	G	G	G	G	R	R	R	G	G
S46_1538751	T/C	46	1538751	+	NA	NA	NA	NA	NA	NA	T	T	T	T	Y	T	T	T	T	T	T	T	T	T	T	T	T	T	T	T	T	T	T	T	T	T	T	T	T	T	T	T	T	T	T	T	T	T	T
S46_1541227	A/T	46	1541227	+	NA	NA	NA	NA	NA	NA	A	A	A	A	N	A	W	A	A	A	W	A	A	A	A	N	A	W	A	W	A	A	W	A	A	W	W	W	A	A	A	A	A	A	T	W	W	N	A
S46_1556111	C/A	46	1556111	+	NA	NA	NA	NA	NA	NA	C	C	C	C	M	C	M	C	C	C	M	C	C	C	C	C	C	M	C	M	C	C	M	C	C	M	M	M	C	C	C	C	C	C	M	M	M	C	C
S46_1559731	G/T	46	1559731	+	NA	NA	NA	NA	NA	NA	G	G	G	G	N	N	K	G	G	G	K	G	G	G	G	G	G	G	G	K	G	G	K	G	G	K	T	K	G	G	G	G	G	G	K	T	K	G	G
S46_1582144	T/A	46	1582144	+	NA	NA	NA	NA	NA	NA	T	T	T	T	W	T	W	T	T	T	W	T	T	T	T	T	T	W	T	W	T	T	W	T	T	W	W	W	T	T	T	T	T	T	W	W	W	T	T
S46_1583328	G/C	46	1583328	+	NA	NA	NA	NA	NA	NA	G	G	G	G	S	G	S	G	G	G	S	G	G	G	G	G	G	S	G	S	S	G	S	G	G	S	S	S	G	G	G	G	G	G	S	S	S	G	G
S46_1583651	C/T	46	1583651	+	NA	NA	NA	NA	NA	NA	C	C	C	C	Y	C	Y	C	C	C	Y	C	C	C	C	C	C	Y	C	Y	C	C	Y	C	C	Y	Y	Y	C	C	C	C	C	C	Y	Y	Y	C	C
S46_1612415	T/C	46	1612415	+	NA	NA	NA	NA	NA	NA	T	T	T	T	C	T	Y	T	T	T	Y	T	T	T	T	T	T	Y	T	C	T	T	C	T	T	Y	Y	Y	T	T	T	T	T	T	Y	C	Y	T	T
S46_1659471	A/C	46	1659471	+	NA	NA	NA	NA	NA	NA	N	A	A	A	A	A	A	A	A	A	A	A	A	A	A	A	A	A	N	A	A	A	A	A	A	A	A	A	A	N	A	A	A	A	A	A	A	A	A
S46_1664837	C/A	46	1664837	+	NA	NA	NA	NA	NA	NA	C	C	C	C	N	C	M	C	C	C	M	C	C	C	C	C	C	A	C	M	C	C	M	C	C	M	M	M	C	C	C	C	C	C	M	M	M	C	C
S46_1665013	A/G	46	1665013	+	NA	NA	NA	NA	NA	NA	A	A	A	A	G	A	R	A	A	A	R	A	A	A	A	A	A	R	A	R	R	A	R	A	A	R	A	R	A	A	A	A	A	A	R	R	R	A	A
S46_1667286	T/C	46	1667286	+	NA	NA	NA	NA	NA	NA	T	T	T	T	T	N	T	T	T	T	T	T	T	T	T	T	T	Y	T	Y	T	T	Y	T	T	Y	Y	T	T	T	T	T	T	T	T	Y	Y	T	T
S46_1700565	G/A	46	1700565	+	NA	NA	NA	NA	NA	NA	G	G	G	G	R	G	R	G	G	G	R	G	G	G	G	G	G	G	G	R	G	G	R	G	G	R	G	R	G	G	G	G	G	G	R	R	G	G	G
S46_1720768	A/G	46	1720768	+	NA	NA	NA	NA	NA	NA	A	A	A	A	R	A	A	A	A	A	A	A	A	A	A	A	A	A	A	A	A	A	A	A	A	A	A	A	A	A	A	A	A	A	A	A	A	A	A
S46_1743629	A/C	46	1743629	+	NA	NA	NA	NA	NA	NA	A	A	A	A	M	N	M	A	A	A	M	A	A	A	A	A	A	C	A	M	A	A	M	A	A	M	M	M	A	A	A	A	A	A	M	M	M	A	A
S46_1744333	A/G	46	1744333	+	NA	NA	NA	NA	NA	NA	A	A	A	A	R	A	R	A	A	A	R	A	A	A	N	A	A	R	A	R	A	A	R	A	A	R	R	R	A	A	A	A	A	A	R	R	R	A	A
S46_1744439	A/G	46	1744439	+	NA	NA	NA	NA	NA	NA	N	A	A	A	R	A	A	A	A	A	R	A	A	A	N	A	A	R	A	R	R	A	R	A	A	R	R	R	A	N	A	A	A	A	R	R	R	A	A
S46_1755726	C/T/A	46	1755726	+	NA	NA	NA	NA	NA	NA	C	C	C	C	M	C	Y	C	C	C	Y	C	C	C	C	C	C	Y	C	Y	C	C	Y	C	C	Y	Y	Y	C	C	C	C	C	C	Y	Y	Y	C	C
S46_1759865	C/A	46	1759865	+	NA	NA	NA	NA	NA	NA	C	C	C	C	M	C	M	C	C	C	M	C	C	C	C	C	C	M	C	M	M	C	M	C	C	M	M	M	C	C	C	C	C	C	M	M	M	C	C
S46_1760651	T/A	46	1760651	+	NA	NA	NA	NA	NA	NA	T	T	T	T	W	N	W	T	T	T	W	T	T	T	T	T	T	T	T	A	W	T	W	T	T	A	W	W	T	T	T	T	T	T	W	W	W	T	T
S46_1760767	G/C	46	1760767	+	NA	NA	NA	NA	NA	NA	G	G	G	G	C	G	S	G	G	G	S	N	G	G	G	G	G	S	G	S	G	G	S	G	G	S	S	G	G	G	G	G	G	G	S	S	C	G	G
S46_1773919	T/C	46	1773919	+	NA	NA	NA	NA	NA	NA	T	T	T	T	C	N	T	T	N	T	Y	T	T	T	N	T	T	T	N	Y	T	T	T	T	T	Y	Y	Y	T	T	T	T	T	T	Y	Y	C	T	T
S46_1795032	C/G	46	1795032	+	NA	NA	NA	NA	NA	NA	C	C	C	C	S	C	S	C	C	C	G	C	C	C	C	C	C	S	C	G	C	C	S	C	C	S	S	S	C	C	C	C	C	C	S	S	S	C	C
S46_1796381	A/T	46	1796381	+	NA	NA	NA	NA	NA	NA	A	A	A	A	A	A	A	A	N	A	W	A	A	A	N	A	A	T	A	W	W	A	W	A	A	W	A	W	A	A	A	A	A	A	W	W	A	A	A
S46_1797298	T/C	46	1797298	+	NA	NA	NA	NA	NA	NA	T	T	T	T	Y	T	T	T	T	T	T	T	T	T	T	T	T	T	T	T	T	T	T	T	T	T	T	T	T	T	T	T	T	T	T	T	T	T	T
S46_1802752	A/G	46	1802752	+	NA	NA	NA	NA	NA	NA	A	A	A	A	A	A	R	A	A	A	R	A	A	A	N	A	A	N	A	R	R	A	R	A	A	R	R	R	A	A	A	A	A	A	R	R	R	A	A
S46_1811931	T/C	46	1811931	+	NA	NA	NA	NA	NA	NA	T	T	T	T	N	N	Y	T	T	T	Y	T	T	T	N	N	T	Y	T	Y	Y	T	Y	T	T	Y	Y	Y	T	T	T	T	T	T	Y	Y	Y	T	T
S46_1812098	T/C	46	1812098	+	NA	NA	NA	NA	NA	NA	T	T	T	T	T	T	Y	T	T	T	Y	T	T	T	T	T	T	Y	T	Y	T	T	Y	T	T	Y	Y	Y	T	T	T	T	T	T	Y	Y	Y	T	T
S46_1818452	A/G	46	1818452	+	NA	NA	NA	NA	NA	NA	A	A	A	A	N	A	R	A	N	A	R	A	A	A	N	A	A	G	A	R	A	A	R	A	A	A	A	R	A	A	A	A	A	N	R	R	R	A	A
S46_1818573	A/G	46	1818573	+	NA	NA	NA	NA	NA	NA	A	A	A	A	G	A	A	A	A	A	R	A	A	A	N	N	A	R	A	R	A	A	R	A	A	R	R	G	A	N	A	A	A	A	R	G	A	A	A
S46_1834900	A/T	46	1834900	+	NA	NA	NA	NA	NA	NA	A	A	A	A	A	A	T	A	A	A	W	A	A	A	A	A	A	W	A	W	A	A	W	A	A	W	W	W	A	A	A	A	A	A	W	W	W	A	A
S46_1854039	A/T	46	1854039	+	NA	NA	NA	NA	NA	NA	A	A	A	A	W	A	W	A	A	A	W	A	A	A	A	A	A	W	A	W	A	A	W	A	A	W	W	W	A	A	A	A	A	A	W	W	W	A	A
S46_1858048	T/C	46	1858048	+	NA	NA	NA	NA	NA	NA	T	T	T	T	C	T	Y	T	T	T	Y	T	T	T	T	T	T	Y	T	Y	T	T	Y	T	T	Y	Y	Y	T	T	T	T	T	T	Y	Y	Y	T	T
S46_1869852	G/A	46	1869852	+	NA	NA	NA	NA	NA	NA	G	G	G	G	A	G	R	G	G	G	R	G	G	G	G	G	G	R	G	R	G	G	R	G	G	R	A	R	G	G	G	G	G	G	R	R	R	G	G
S46_1869999	T/G	46	1869999	+	NA	NA	NA	NA	NA	NA	T	T	T	T	K	T	K	T	T	T	K	T	T	T	T	T	T	K	T	K	K	T	K	T	T	K	K	K	T	T	T	T	T	T	K	K	K	T	T
S46_1878921	T/A	46	1878921	+	NA	NA	NA	NA	NA	NA	T	T	T	T	T	T	W	T	T	T	W	T	T	T	T	T	T	W	T	W	W	T	W	T	T	W	W	W	T	T	T	T	T	T	W	W	W	T	T
S46_1928914	C/G	46	1928914	+	NA	NA	NA	NA	NA	NA	C	C	C	C	C	N	C	C	C	C	C	C	C	C	N	C	C	C	C	C	C	C	C	C	C	C	C	C	C	C	C	C	C	C	C	C	C	C	C
S46_1942232	A/G	46	1942232	+	NA	NA	NA	NA	NA	NA	A	A	A	A	N	A	A	A	A	A	R	A	A	A	A	A	A	R	A	R	A	A	R	A	A	R	R	G	A	A	A	A	A	A	G	R	G	A	A
S46_1950890	A/T/G	46	1950890	+	NA	NA	NA	NA	NA	NA	A	A	A	A	A	A	W	A	A	A	W	A	A	A	A	A	A	W	A	W	W	A	W	A	A	W	W	W	A	A	A	A	A	A	W	W	W	A	A
S46_1959643	A/G	46	1959643	+	NA	NA	NA	NA	NA	NA	A	A	A	A	R	A	R	A	A	A	R	A	A	A	N	A	A	R	A	R	A	A	R	A	A	R	R	R	A	A	A	A	A	A	R	R	R	A	A
S46_1961631	T/G	46	1961631	+	NA	NA	NA	NA	NA	NA	T	T	T	T	K	T	K	T	T	T	K	T	T	T	T	T	T	K	T	K	K	T	K	T	T	K	K	K	T	T	T	T	T	T	K	K	K	T	T
S46_1975745	A/G	46	1975745	+	NA	NA	NA	NA	NA	NA	A	A	A	A	G	A	A	A	A	A	A	A	A	A	A	A	A	A	A	A	A	A	A	A	A	A	A	A	A	A	A	A	A	A	A	A	A	A	A
S46_1984298	G/A	46	1984298	+	NA	NA	NA	NA	NA	NA	G	G	G	G	R	G	G	G	G	G	G	G	G	G	G	G	G	G	G	G	G	G	G	G	G	G	G	G	G	G	G	G	G	G	G	G	G	G	G
S46_1986110	G/A	46	1986110	+	NA	NA	NA	NA	NA	NA	G	G	N	G	G	G	R	G	G	G	R	G	G	G	N	G	G	G	G	R	R	G	R	G	G	R	G	R	N	N	G	G	G	G	R	R	R	G	G
S46_2002530	T/C	46	2002530	+	NA	NA	NA	NA	NA	NA	T	T	T	T	C	T	Y	T	T	T	Y	T	T	T	N	T	T	Y	T	Y	Y	T	Y	T	T	Y	Y	C	T	T	T	T	T	T	Y	Y	Y	T	T
S46_2003932	G/T	46	2003932	+	NA	NA	NA	NA	NA	NA	G	G	G	G	G	G	K	G	G	G	K	G	G	G	N	G	G	T	G	K	K	G	K	G	G	K	K	K	G	G	G	G	G	G	K	K	K	G	G
S46_2029415	T/C	46	2029415	+	NA	NA	NA	NA	NA	NA	T	T	T	T	Y	T	Y	T	T	T	Y	T	T	T	T	T	T	Y	T	Y	Y	T	Y	T	T	Y	Y	Y	T	T	T	T	T	T	Y	Y	Y	T	T
S46_2038154	C/T	46	2038154	+	NA	NA	NA	NA	NA	NA	N	C	C	C	N	C	Y	C	C	C	Y	C	C	C	C	C	C	N	C	Y	C	C	Y	C	C	Y	Y	Y	C	C	C	C	C	C	Y	Y	C	C	C
S46_2055866	G/A	46	2055866	+	NA	NA	NA	NA	NA	NA	N	G	G	G	N	N	R	G	G	G	R	G	G	G	N	G	G	G	G	R	N	G	R	G	G	R	A	R	G	G	G	G	G	G	A	R	R	G	G
S46_2083429	C/T	46	2083429	+	NA	NA	NA	NA	NA	NA	C	C	C	C	Y	C	Y	C	C	C	Y	C	C	C	C	C	C	Y	C	Y	C	C	Y	C	C	Y	C	Y	C	C	C	C	C	C	Y	Y	Y	C	C
S46_2084879	G/A	46	2084879	+	NA	NA	NA	NA	NA	NA	G	G	R	G	G	G	G	G	G	G	G	G	G	G	G	G	G	G	G	G	G	G	G	G	G	G	G	G	G	G	G	G	G	G	G	G	G	G	G
S46_2094464	T/C	46	2094464	+	NA	NA	NA	NA	NA	NA	T	T	T	T	Y	T	Y	T	T	T	Y	T	T	T	N	T	T	Y	T	Y	Y	T	Y	T	T	Y	C	Y	N	T	T	T	T	T	Y	C	Y	T	T
S46_2094579	C/T	46	2094579	+	NA	NA	NA	NA	NA	NA	C	C	C	C	N	C	Y	C	C	C	Y	C	C	C	N	C	C	Y	C	Y	C	C	Y	C	C	Y	T	C	C	C	C	C	N	C	Y	Y	Y	C	C
S46_2094837	C/G	46	2094837	+	NA	NA	NA	NA	NA	NA	C	C	C	C	C	C	S	C	C	C	S	C	C	C	C	C	C	S	C	S	C	C	S	C	C	S	S	S	C	C	C	C	C	C	S	S	S	C	C
S46_2096277	T/C	46	2096277	+	NA	NA	NA	NA	NA	NA	T	T	T	T	Y	T	Y	T	T	T	Y	T	T	T	N	N	T	Y	T	Y	T	T	Y	T	T	C	Y	Y	T	T	T	T	T	T	Y	Y	Y	T	T
S46_2104422	T/C	46	2104422	+	NA	NA	NA	NA	NA	NA	T	T	T	T	Y	N	Y	T	T	T	Y	N	T	T	T	T	T	C	T	Y	T	T	Y	T	T	Y	Y	Y	T	N	T	T	T	N	Y	Y	Y	T	T
S46_2105744	T/C	46	2105744	+	NA	NA	NA	NA	NA	NA	N	T	Y	T	T	N	T	T	T	T	T	T	T	T	T	T	T	N	T	T	T	T	T	T	T	T	N	T	T	N	T	T	T	N	T	T	T	T	T
S46_2106070	T/C	46	2106070	+	NA	NA	NA	NA	NA	NA	T	T	Y	T	T	T	Y	T	T	T	Y	N	N	T	T	T	T	Y	T	Y	T	T	Y	T	T	Y	Y	Y	T	T	T	T	T	T	Y	Y	Y	T	T
S46_2111473	G/A	46	2111473	+	NA	NA	NA	NA	NA	NA	G	G	G	G	R	G	R	G	G	G	R	G	G	G	G	G	G	R	G	R	R	G	R	G	G	R	A	R	G	G	G	G	G	G	R	R	R	G	G
S46_2123702	A/C	46	2123702	+	NA	NA	NA	NA	NA	NA	A	A	A	A	M	A	M	A	A	A	M	A	A	A	A	A	A	M	A	M	A	A	M	A	A	M	M	M	A	A	A	A	A	A	M	M	M	A	A
S46_2134746	G/A	46	2134746	+	NA	NA	NA	NA	NA	NA	G	G	G	G	R	G	R	G	G	G	R	G	G	G	G	G	G	R	G	R	G	G	R	G	G	R	R	R	G	G	G	G	G	G	R	R	R	G	G
S46_2148283	T/C	46	2148283	+	NA	NA	NA	NA	NA	NA	T	T	T	T	Y	T	Y	T	T	T	Y	T	T	T	T	T	T	Y	T	Y	Y	T	Y	T	T	Y	Y	Y	T	T	T	T	T	T	Y	Y	Y	T	T
S46_2148557	A/T	46	2148557	+	NA	NA	NA	NA	NA	NA	A	A	A	A	N	A	W	A	A	A	W	A	A	A	N	A	A	W	A	W	A	A	A	A	A	W	A	W	A	A	A	A	A	A	W	W	T	A	A
S46_2154405	A/G	46	2154405	+	NA	NA	NA	NA	NA	NA	A	A	A	A	N	A	R	A	A	A	R	A	A	A	N	A	A	R	A	R	A	A	R	A	A	R	R	R	A	A	A	A	A	A	R	R	R	A	A
S46_2180139	G/T	46	2180139	+	NA	NA	NA	NA	NA	NA	G	G	G	G	K	G	K	G	G	G	K	G	G	G	G	G	G	K	G	K	K	G	K	G	G	K	K	K	N	G	G	G	G	G	K	K	K	G	G
S46_2180266	G/T	46	2180266	+	NA	NA	NA	NA	NA	NA	G	G	G	G	N	G	K	G	G	G	K	G	G	G	G	G	G	G	G	G	G	G	G	G	G	G	K	G	G	G	G	G	G	G	G	G	K	G	G
S46_2217747	G/A	46	2217747	+	NA	NA	NA	NA	NA	NA	G	G	G	G	R	G	R	G	G	G	R	G	G	G	G	G	G	R	G	R	G	G	R	G	G	R	R	R	G	G	G	G	G	G	R	R	R	G	G
S46_2217904	T/C	46	2217904	+	NA	NA	NA	NA	NA	NA	T	T	T	T	Y	T	Y	T	T	T	Y	T	T	T	T	T	T	Y	T	Y	T	T	Y	T	T	Y	Y	Y	T	T	T	T	T	T	Y	Y	Y	T	T
S46_2233512	A/C	46	2233512	+	NA	NA	NA	NA	NA	NA	N	A	A	A	M	A	M	A	A	A	M	A	A	A	A	A	A	M	A	M	A	A	M	A	A	M	M	M	A	A	A	A	A	A	M	M	M	A	A
S46_2237353	G/A	46	2237353	+	NA	NA	NA	NA	NA	NA	N	G	N	G	N	G	R	G	G	G	R	N	G	G	G	G	G	G	G	R	G	G	G	G	G	A	N	G	G	G	G	G	G	G	A	R	A	G	G
S46_2239027	C/T	46	2239027	+	NA	NA	NA	NA	NA	NA	N	C	C	C	Y	C	Y	C	C	C	Y	C	C	C	N	C	C	Y	C	Y	C	C	Y	C	C	T	Y	Y	C	C	C	C	C	C	Y	Y	Y	C	C
S46_2239167	C/T	46	2239167	+	NA	NA	NA	NA	NA	NA	N	C	C	C	T	N	Y	C	C	C	Y	C	C	C	N	C	C	Y	C	Y	C	C	Y	C	C	Y	Y	Y	C	C	C	C	C	C	Y	Y	Y	C	C
S46_2239463	G/A	46	2239463	+	NA	NA	NA	NA	NA	NA	G	G	N	G	A	G	R	G	G	G	R	G	G	G	N	G	G	R	G	R	G	G	R	G	G	R	R	R	G	G	G	G	G	G	R	R	R	G	G
S46_2239598	T/G	46	2239598	+	NA	NA	NA	NA	NA	NA	T	T	T	T	T	T	K	T	T	T	K	T	T	T	T	T	T	K	T	K	T	T	K	T	T	K	K	K	T	T	T	T	T	T	K	K	K	T	T
S46_2248064	A/G	46	2248064	+	NA	NA	NA	NA	NA	NA	A	A	R	A	A	A	A	A	A	A	A	A	A	A	A	A	A	A	A	A	A	A	A	A	A	A	A	A	A	A	A	A	A	A	A	A	A	A	A
S46_2257052	G/A	46	2257052	+	NA	NA	NA	NA	NA	NA	N	G	R	G	G	G	G	G	G	N	G	N	G	G	G	G	G	G	G	G	G	G	G	G	G	G	G	G	G	G	G	G	G	G	G	G	G	G	G
S46_2265913	T/C	46	2265913	+	NA	NA	NA	NA	NA	NA	T	T	T	T	N	T	T	T	T	T	Y	T	T	T	T	T	T	T	T	Y	Y	T	Y	T	T	Y	Y	Y	T	T	T	T	T	T	Y	Y	Y	T	T
S46_2266060	T/C	46	2266060	+	NA	NA	NA	NA	NA	NA	T	T	T	T	N	T	Y	T	T	T	C	T	T	T	T	T	T	T	T	Y	T	T	Y	T	T	Y	Y	Y	T	T	T	T	T	T	Y	Y	Y	T	T
S46_2282338	G/A	46	2282338	+	NA	NA	NA	NA	NA	NA	G	G	G	G	G	G	R	G	G	G	R	G	G	G	N	G	G	R	G	R	R	G	R	G	G	R	R	R	G	G	G	G	G	G	R	R	R	G	G
S46_2294102	A/C	46	2294102	+	NA	NA	NA	NA	NA	NA	N	A	A	A	A	A	M	A	A	A	M	A	A	A	N	A	A	M	A	C	M	A	M	A	A	M	M	M	A	A	A	A	A	A	M	M	M	A	A
S46_2316134	T/A	46	2316134	+	NA	NA	NA	NA	NA	NA	T	T	T	T	T	T	T	T	T	T	T	T	T	T	N	T	T	T	T	T	T	T	T	T	T	T	W	T	T	T	T	T	T	T	T	T	T	T	T
S46_2319511	C/T	46	2319511	+	NA	NA	NA	NA	NA	NA	N	C	C	C	T	C	Y	C	C	C	Y	C	N	C	C	C	C	Y	C	Y	C	C	Y	C	C	Y	Y	Y	C	C	C	C	C	N	Y	Y	Y	C	C
S46_2320788	T/C	46	2320788	+	NA	NA	NA	NA	NA	NA	T	T	T	T	T	T	Y	T	T	T	Y	T	T	T	T	T	T	Y	T	Y	T	T	Y	T	T	Y	Y	Y	T	T	T	T	T	T	Y	Y	Y	T	T
S46_2320915	T/C	46	2320915	+	NA	NA	NA	NA	NA	NA	T	T	T	T	Y	T	Y	T	T	T	Y	T	T	T	T	T	T	Y	T	Y	T	T	Y	T	T	Y	Y	Y	T	T	T	T	T	T	Y	Y	Y	T	T
S46_2334270	C/A	46	2334270	+	NA	NA	NA	NA	NA	NA	C	C	C	C	C	C	M	C	C	C	M	C	C	C	C	C	C	M	C	M	C	C	M	C	C	M	M	M	C	C	C	C	C	C	M	M	M	C	C
S46_2338121	T/C	46	2338121	+	NA	NA	NA	NA	NA	NA	T	T	T	T	T	T	Y	T	T	T	Y	T	T	T	T	T	T	Y	T	Y	Y	T	Y	T	T	Y	Y	Y	T	T	T	T	T	T	Y	Y	Y	T	T
S46_2366763	A/T	46	2366763	+	NA	NA	NA	NA	NA	NA	A	A	A	A	A	A	W	A	A	A	W	A	A	A	A	A	A	W	A	W	W	A	W	A	A	W	W	W	A	A	A	A	A	A	W	W	W	A	A
S46_2370521	G/A	46	2370521	+	NA	NA	NA	NA	NA	NA	G	G	G	G	G	G	R	G	G	G	R	G	G	G	G	G	G	R	G	R	R	G	R	G	G	R	R	R	G	G	G	G	G	G	R	R	R	G	G
S46_2389261	C/A	46	2389261	+	NA	NA	NA	NA	NA	NA	C	C	C	C	M	C	M	C	C	C	M	C	C	C	C	C	C	M	C	M	M	C	M	C	C	M	M	M	C	C	C	C	C	C	M	M	M	C	C
S46_2444926	T/C	46	2444926	+	NA	NA	NA	NA	NA	NA	T	T	T	T	Y	T	Y	T	T	T	Y	T	T	T	T	T	T	Y	T	Y	Y	T	Y	T	T	Y	Y	Y	T	T	T	T	T	T	Y	Y	Y	T	T
S46_2448342	C/T	46	2448342	+	NA	NA	NA	NA	NA	NA	C	C	C	C	C	C	Y	C	C	C	Y	C	C	C	C	C	C	C	C	C	Y	C	C	C	C	C	C	C	C	C	C	C	C	C	C	Y	C	C	C
S46_2448757	G/A	46	2448757	+	NA	NA	NA	NA	NA	NA	G	G	G	G	G	G	R	G	G	G	R	G	G	G	G	G	G	R	G	R	G	G	R	G	G	R	R	R	G	N	G	G	G	G	R	R	R	G	G
S46_2449287	T/C	46	2449287	+	NA	NA	NA	NA	NA	NA	T	T	T	T	Y	T	Y	T	T	T	Y	T	T	T	T	T	T	Y	T	Y	Y	T	Y	T	T	Y	Y	C	T	T	T	T	T	T	Y	Y	Y	T	T
S46_2451597	A/G	46	2451597	+	NA	NA	NA	NA	NA	NA	A	A	A	A	R	A	R	A	A	A	R	A	A	A	A	A	A	R	A	R	R	A	R	A	A	R	R	R	A	A	A	A	A	A	R	R	R	A	A
S46_2471468	C/T	46	2471468	+	NA	NA	NA	NA	NA	NA	C	C	C	C	Y	C	Y	C	C	C	Y	C	C	C	C	C	C	Y	C	Y	C	C	Y	C	C	C	Y	Y	C	C	C	C	C	C	Y	C	Y	C	C
S46_2517077	T/G	46	2517077	+	NA	NA	NA	NA	NA	NA	T	T	T	T	T	T	K	T	T	T	K	T	T	T	T	T	T	K	T	K	T	T	K	T	T	K	K	K	T	T	T	T	T	T	T	K	K	T	T
S46_2561217	T/G	46	2561217	+	NA	NA	NA	NA	NA	NA	T	T	T	T	G	T	K	T	T	T	K	T	T	T	T	T	T	K	T	K	K	T	K	T	T	K	K	K	T	T	T	T	T	T	T	K	K	T	T
S46_2572557	C/T	46	2572557	+	NA	NA	NA	NA	NA	NA	C	C	C	C	Y	C	Y	C	C	C	Y	C	C	C	C	C	C	Y	C	Y	C	C	Y	C	C	Y	Y	Y	C	C	C	C	C	C	C	Y	Y	C	C
S46_2578336	T/G	46	2578336	+	NA	NA	NA	NA	NA	NA	T	T	T	T	K	T	K	T	T	T	K	T	T	T	T	T	T	K	T	K	T	T	K	T	T	K	K	K	T	T	T	T	T	T	T	K	K	T	T
S46_2581215	G/C	46	2581215	+	NA	NA	NA	NA	NA	NA	G	G	G	G	S	G	S	G	G	G	S	G	G	G	G	G	G	S	G	S	G	G	S	G	G	S	S	S	G	G	G	G	G	G	G	S	S	G	G
S46_2581320	A/C	46	2581320	+	NA	NA	NA	NA	NA	NA	A	A	A	A	M	A	M	A	A	A	M	A	A	A	A	A	A	M	A	M	A	A	M	A	A	M	M	M	A	A	A	A	A	A	A	M	M	A	A
S46_2584733	A/G	46	2584733	+	NA	NA	NA	NA	NA	NA	A	A	A	A	R	N	R	A	A	A	R	A	A	A	N	A	N	R	A	R	G	A	R	A	A	G	R	R	A	A	A	A	A	A	A	R	R	A	A
S46_2607183	G/A	46	2607183	+	NA	NA	NA	NA	NA	NA	N	G	G	G	A	G	G	G	G	G	A	G	G	G	G	G	G	A	G	R	G	G	R	G	G	R	A	R	G	G	G	G	G	G	G	R	R	G	G
S46_2608490	C/A	46	2608490	+	NA	NA	NA	NA	NA	NA	C	C	C	C	M	C	M	C	C	C	M	C	C	C	C	C	C	C	C	M	C	C	M	C	C	M	M	M	C	C	C	C	C	C	C	M	C	C	C
S46_2611532	T/A	46	2611532	+	NA	NA	NA	NA	NA	NA	T	T	T	T	T	T	T	T	T	T	T	W	T	T	T	T	T	N	T	T	T	T	T	T	T	T	T	T	T	T	T	T	T	T	T	T	T	T	T
S46_2619514	A/T	46	2619514	+	NA	NA	NA	NA	NA	NA	A	A	A	A	A	A	A	A	A	A	A	A	A	A	A	A	A	A	A	A	A	A	A	A	A	A	A	A	A	A	A	A	A	A	A	A	A	A	A
S46_2667447	T/C	46	2667447	+	NA	NA	NA	NA	NA	NA	T	T	T	T	Y	T	Y	T	T	T	Y	T	T	T	T	T	T	Y	T	Y	Y	T	Y	T	T	Y	T	Y	T	Y	T	T	T	T	T	Y	Y	T	T
S46_2667590	G/A	46	2667590	+	NA	NA	NA	NA	NA	NA	N	G	G	G	G	N	G	G	G	G	G	G	G	G	G	G	G	G	G	G	G	G	G	G	G	G	G	G	G	G	G	G	G	G	G	G	G	G	G
S46_2669251	G/A	46	2669251	+	NA	NA	NA	NA	NA	NA	G	G	G	G	R	G	R	G	G	G	R	G	G	G	G	G	G	R	G	R	G	G	R	G	G	R	G	R	G	R	G	G	G	G	G	R	R	G	G
S46_2685057	A/C	46	2685057	+	NA	NA	NA	NA	NA	NA	A	A	A	A	M	A	M	A	A	A	M	A	A	A	A	A	A	C	A	M	A	A	M	A	A	M	A	M	A	A	A	A	A	A	A	M	M	A	A
S46_2685359	A/C	46	2685359	+	NA	NA	NA	NA	NA	NA	A	A	A	A	A	A	M	A	A	A	M	A	A	A	A	A	A	M	A	M	M	A	M	A	A	M	A	M	A	M	A	A	A	A	A	M	M	A	A
S46_2685561	T/G	46	2685561	+	NA	NA	NA	NA	NA	NA	T	T	T	T	N	T	T	N	T	T	T	T	T	T	T	T	T	T	T	T	T	T	T	T	T	T	T	T	T	T	T	T	T	T	T	T	T	T	T
S46_2686020	G/A	46	2686020	+	NA	NA	NA	NA	NA	NA	G	G	G	G	R	G	R	G	G	G	R	G	G	G	G	G	G	R	G	R	R	G	R	G	G	R	G	R	G	R	G	G	G	G	G	R	R	G	G
S46_2689080	C/A	46	2689080	+	NA	NA	NA	NA	NA	NA	C	C	C	C	M	C	M	C	C	C	M	C	C	C	C	C	C	M	C	M	M	C	M	C	C	M	C	M	C	M	C	C	C	C	C	M	M	C	C
S46_2695202	G/A	46	2695202	+	NA	NA	NA	NA	NA	NA	G	G	G	G	R	G	R	G	G	G	R	G	G	G	G	G	G	R	G	R	G	G	R	G	G	R	G	R	G	R	G	G	G	G	G	R	R	G	G
S46_2700211	A/G	46	2700211	+	NA	NA	NA	NA	NA	NA	A	A	A	A	A	A	R	A	A	A	R	A	A	A	N	A	A	G	A	R	A	A	R	A	A	R	A	A	A	A	A	A	A	A	A	R	A	A	A
S46_2700324	T/A	46	2700324	+	NA	NA	NA	NA	NA	NA	T	A	T	T	A	N	W	T	T	T	W	T	T	T	T	T	T	W	T	W	T	T	W	T	T	W	T	W	T	W	T	T	T	T	T	W	W	T	T
S46_2704275	T/C	46	2704275	+	NA	NA	NA	NA	NA	NA	T	T	T	T	Y	T	Y	T	T	T	Y	T	T	T	T	T	T	Y	T	Y	T	T	Y	T	T	Y	T	T	T	Y	T	T	T	T	T	Y	C	T	T
S46_2710612	G/A	46	2710612	+	NA	NA	NA	NA	NA	NA	G	G	G	G	R	G	R	G	G	G	R	G	G	G	G	G	G	R	G	R	G	G	R	G	G	R	G	R	G	R	G	G	G	G	G	R	R	G	G
S46_2719605	C/T	46	2719605	+	NA	NA	NA	NA	NA	NA	C	C	C	C	T	N	C	C	C	N	C	C	C	C	C	C	C	N	C	C	C	C	C	C	C	C	C	C	C	C	C	C	C	C	C	C	C	C	C
S46_2817817	T/C	46	2817817	+	NA	NA	NA	NA	NA	NA	T	T	T	T	C	T	Y	T	T	T	Y	T	T	T	T	T	T	Y	T	Y	T	T	Y	T	T	Y	T	Y	T	Y	T	T	T	T	T	Y	Y	T	T
S46_2821057	A/G	46	2821057	+	NA	NA	NA	NA	NA	NA	A	A	A	A	A	A	R	A	A	A	A	A	A	A	N	A	A	R	A	R	A	A	G	A	A	R	A	R	N	R	A	A	A	A	A	R	R	A	A
S46_2841886	A/G	46	2841886	+	NA	NA	NA	NA	NA	NA	A	A	A	A	G	A	R	A	A	A	R	A	A	A	A	A	A	A	A	R	A	A	R	A	A	R	A	R	A	R	A	A	A	A	A	R	R	A	A
S46_2855152	A/T	46	2855152	+	NA	NA	NA	NA	NA	NA	A	A	A	A	N	N	W	A	A	N	W	A	N	A	N	A	A	W	A	W	A	A	W	A	A	W	A	N	A	N	A	A	A	A	A	T	W	A	A
S46_2863530	C/T	46	2863530	+	NA	NA	NA	NA	NA	NA	C	C	C	C	Y	N	Y	C	C	C	Y	C	C	C	N	C	C	Y	C	Y	C	C	Y	C	C	Y	C	Y	C	Y	C	C	C	C	C	T	C	C	C
S46_2867638	C/G	46	2867638	+	NA	NA	NA	NA	NA	NA	N	S	C	C	G	N	S	C	N	C	G	C	C	C	C	C	C	G	C	S	C	C	G	C	C	S	C	S	N	C	C	C	C	C	C	S	G	C	C
S46_2876805	A/T	46	2876805	+	NA	NA	NA	NA	NA	NA	A	A	A	A	A	A	W	A	A	A	W	A	A	A	A	A	A	A	A	W	A	A	W	A	A	W	A	W	A	W	A	A	A	A	A	W	W	A	A
S46_2883964	C/T	46	2883964	+	NA	NA	NA	NA	NA	NA	C	C	Y	C	C	C	C	C	C	C	C	C	C	C	N	C	C	C	C	C	C	C	C	C	C	C	C	N	C	N	C	C	C	N	C	C	C	C	C
S46_2907066	C/G	46	2907066	+	NA	NA	NA	NA	NA	NA	C	C	C	C	G	C	S	C	C	C	S	C	C	C	C	N	C	N	C	S	N	C	S	C	C	S	C	S	N	C	N	C	C	N	C	S	C	C	C
S46_2915378	A/G	46	2915378	+	NA	NA	NA	NA	NA	NA	A	A	A	A	A	A	R	A	A	A	R	A	A	A	N	A	A	R	A	R	A	A	R	A	A	R	A	R	A	A	A	A	A	A	A	A	R	A	A
S46_2918886	T/A	46	2918886	+	NA	NA	NA	NA	NA	NA	T	T	T	T	W	T	W	T	T	T	W	T	T	T	T	T	T	W	T	W	T	T	W	T	T	W	T	W	T	W	T	T	T	T	T	W	W	T	T
S46_2924164	A/T	46	2924164	+	NA	NA	NA	NA	NA	NA	A	A	A	A	W	A	W	A	A	A	W	A	A	A	A	A	A	W	A	W	W	A	W	A	A	W	A	W	A	W	A	A	A	A	A	W	W	A	A
S46_2929473	A/T	46	2929473	+	NA	NA	NA	NA	NA	NA	A	A	A	A	A	N	W	A	N	A	W	A	A	A	N	A	A	A	A	W	W	A	W	A	A	W	A	W	A	T	A	A	A	A	A	W	W	A	A
S46_2938358	G/A	46	2938358	+	NA	NA	NA	NA	NA	NA	G	G	R	G	R	G	R	G	G	G	R	G	G	R	G	G	G	R	G	R	R	G	R	G	G	R	G	R	G	R	G	G	G	G	G	R	R	G	G
S46_2955160	G/A	46	2955160	+	NA	NA	NA	NA	NA	NA	G	G	G	G	R	G	R	G	G	G	R	G	G	R	G	G	G	R	G	R	G	G	R	G	G	R	G	R	G	R	G	G	G	G	G	R	R	G	G
S46_3002456	C/G	46	3002456	+	NA	NA	NA	NA	NA	NA	C	C	C	C	G	N	G	C	C	N	S	C	C	C	C	C	C	C	C	S	C	C	S	C	C	G	C	G	C	N	C	C	C	C	C	S	S	C	C
S46_3013237	A/T	46	3013237	+	NA	NA	NA	NA	NA	NA	A	A	A	A	N	N	W	A	A	A	W	A	A	W	N	A	A	T	A	W	W	A	W	A	A	W	A	W	A	W	A	A	A	A	A	W	W	A	A
S46_3014115	A/G	46	3014115	+	NA	NA	NA	NA	NA	NA	A	A	A	A	N	N	A	A	A	A	R	A	A	G	N	A	A	R	A	R	R	A	R	A	A	R	A	R	A	N	A	A	A	A	A	R	R	A	A
S46_3014232	G/A	46	3014232	+	NA	NA	NA	NA	NA	NA	G	G	G	G	A	N	R	G	G	G	R	G	G	R	G	G	G	R	G	R	G	G	R	G	G	R	G	R	N	R	G	G	G	G	G	R	R	G	G
S46_3017409	T/C	46	3017409	+	NA	NA	NA	NA	NA	NA	T	T	N	T	N	T	Y	T	T	T	Y	T	T	C	T	T	T	N	T	T	T	T	Y	T	T	Y	T	T	N	T	T	T	T	T	T	T	Y	T	T
S46_3019017	A/C	46	3019017	+	NA	NA	NA	NA	NA	NA	A	A	A	A	M	A	M	A	A	A	M	A	A	M	A	A	A	M	A	M	M	A	M	A	A	M	A	M	A	M	A	A	A	A	A	M	M	A	A
S46_3019119	T/G	46	3019119	+	NA	NA	NA	NA	NA	NA	T	T	T	T	N	T	G	T	T	T	K	T	T	K	T	T	T	G	T	K	K	T	K	T	T	K	T	K	T	G	T	T	T	T	T	K	K	T	T
S46_3027490	G/A	46	3027490	+	NA	NA	NA	NA	NA	NA	G	G	G	G	N	G	A	G	G	G	R	G	G	R	G	G	G	A	G	R	G	G	R	G	G	R	G	A	G	A	G	G	G	G	G	R	R	G	G
S46_3050576	A/T	46	3050576	+	NA	NA	NA	NA	NA	NA	A	A	A	A	W	A	W	A	A	A	W	A	A	W	A	A	A	W	A	W	W	A	W	A	A	W	A	W	A	W	A	A	A	A	A	W	W	A	A
S46_3067805	A/G	46	3067805	+	NA	NA	NA	NA	NA	NA	A	A	A	A	R	A	R	A	A	A	R	A	A	R	A	A	A	R	A	R	R	A	R	A	A	R	A	R	A	R	A	A	A	A	A	R	R	A	A
S46_3079665	G/A	46	3079665	+	NA	NA	NA	NA	NA	NA	G	G	G	G	G	G	R	G	G	G	R	G	G	R	G	G	G	R	G	R	G	G	R	G	G	G	G	R	G	R	G	G	G	G	G	G	G	G	G
S46_3081423	A/T	46	3081423	+	NA	NA	NA	NA	NA	NA	A	A	A	A	W	A	W	A	A	A	W	A	A	W	A	A	A	W	A	W	A	A	W	A	A	W	A	W	A	W	A	A	A	A	A	W	W	A	A
S46_3086856	T/C	46	3086856	+	NA	NA	NA	NA	NA	NA	T	T	T	T	Y	T	Y	T	T	T	Y	T	T	Y	T	T	T	Y	T	Y	Y	T	Y	T	T	Y	T	Y	T	Y	T	T	T	T	T	Y	Y	T	T
S46_3099522	G/A	46	3099522	+	NA	NA	NA	NA	NA	NA	G	G	G	G	R	G	R	G	G	G	R	G	G	R	G	G	G	R	G	R	G	G	R	G	G	R	G	R	G	R	G	G	G	G	G	R	R	G	G
S46_3103006	T/C	46	3103006	+	NA	NA	NA	NA	NA	NA	T	T	T	T	Y	T	Y	T	T	T	Y	T	T	T	N	T	T	Y	T	Y	T	T	Y	T	T	Y	T	T	T	T	T	T	T	T	T	Y	Y	T	T
S46_3103612	G/C	46	3103612	+	NA	NA	NA	NA	NA	NA	G	G	G	G	G	G	S	G	G	G	S	G	G	S	G	G	G	S	G	S	S	G	S	G	G	S	G	S	G	G	G	G	G	G	G	S	S	G	G
S46_3107626	C/G	46	3107626	+	NA	NA	NA	NA	NA	NA	C	C	C	C	C	N	G	C	C	C	S	C	C	S	C	N	C	S	C	S	C	C	S	C	C	S	N	S	C	G	C	N	C	N	C	S	C	C	C
S46_3107887	G/T	46	3107887	+	NA	NA	NA	NA	NA	NA	G	G	G	G	K	G	K	G	G	G	K	G	G	K	G	G	G	K	G	K	K	G	K	G	G	K	G	K	G	K	G	G	G	G	G	K	K	G	G
S46_3112092	A/G	46	3112092	+	NA	NA	NA	NA	NA	NA	A	A	A	A	N	A	G	A	A	A	R	A	A	R	N	A	A	N	A	A	A	A	R	A	A	R	A	G	A	R	A	A	A	A	A	G	R	N	A
S46_3126628	T/G	46	3126628	+	NA	NA	NA	NA	NA	NA	T	T	T	T	K	T	T	T	T	T	T	T	T	T	N	T	T	T	T	T	T	T	T	T	T	T	T	T	T	T	T	T	T	T	T	T	T	T	T
S46_3136523	C/T	46	3136523	+	NA	NA	NA	NA	NA	NA	C	C	C	C	Y	C	Y	C	C	C	Y	C	C	Y	T	C	C	Y	C	Y	C	C	Y	C	C	Y	C	Y	C	C	C	C	C	C	C	Y	Y	C	C
S46_3151677	C/G	46	3151677	+	NA	NA	NA	NA	NA	NA	C	C	C	C	C	C	S	C	C	C	S	C	C	S	S	C	C	S	C	S	C	C	S	C	C	S	C	S	C	N	C	C	C	C	C	S	S	C	C
S46_3172875	T/C	46	3172875	+	NA	NA	NA	NA	NA	NA	T	T	T	T	Y	N	T	T	T	T	T	N	T	T	T	T	T	T	T	T	T	T	T	T	T	T	T	T	T	T	T	T	T	T	T	T	T	T	T
S46_3200589	A/C	46	3200589	+	NA	NA	NA	NA	NA	NA	A	A	A	A	A	A	A	A	A	A	A	A	A	A	A	A	A	A	A	A	A	A	A	A	A	A	A	A	A	A	A	A	A	A	A	A	A	A	A
S46_3210190	G/A	46	3210190	+	NA	NA	NA	NA	NA	NA	G	G	G	G	G	N	R	G	G	G	R	G	G	G	R	G	G	R	G	R	G	G	R	G	G	R	N	R	G	R	G	G	G	G	G	G	R	G	G
S46_3227831	G/A	46	3227831	+	NA	NA	NA	NA	NA	NA	N	R	N	G	R	G	A	G	G	G	A	G	G	G	N	G	G	G	G	R	N	G	R	G	G	A	G	A	G	R	G	G	G	G	G	R	G	N	G
S46_3228082	G/C	46	3228082	+	NA	NA	NA	NA	NA	NA	G	G	G	G	N	G	S	G	G	G	S	N	G	S	G	G	G	S	G	S	G	G	S	G	G	S	G	S	G	C	G	G	G	G	G	S	G	G	G
S46_3243258	G/A	46	3243258	+	NA	NA	NA	NA	NA	NA	G	G	G	G	R	G	R	G	G	G	R	G	G	R	G	G	G	R	G	R	R	G	R	G	G	R	G	R	G	R	G	G	G	G	G	R	R	G	G
S46_3243384	A/G	46	3243384	+	NA	NA	NA	NA	NA	NA	A	A	A	A	A	A	R	A	A	A	R	A	A	R	A	A	A	R	A	R	A	A	R	A	A	R	A	R	A	R	A	A	A	A	A	R	R	A	A
S46_3252931	C/T	46	3252931	+	NA	NA	NA	NA	NA	NA	C	C	C	C	C	C	Y	C	C	C	Y	C	C	Y	Y	C	C	Y	C	Y	C	C	Y	C	C	Y	C	Y	C	Y	C	C	C	C	C	Y	Y	C	C
S46_3253123	C/T	46	3253123	+	NA	NA	NA	NA	NA	NA	C	C	C	C	C	C	Y	C	C	C	Y	C	C	Y	T	C	C	Y	C	Y	C	C	Y	C	C	Y	C	Y	C	Y	C	C	C	C	C	Y	Y	C	C
S46_3253316	C/T	46	3253316	+	NA	NA	NA	NA	NA	NA	C	C	C	C	Y	C	Y	C	C	C	Y	C	C	T	C	C	C	C	C	Y	C	C	Y	C	C	Y	C	Y	C	Y	C	C	C	C	C	Y	Y	C	C
S46_3257120	A/G	46	3257120	+	NA	NA	NA	NA	NA	NA	A	A	A	A	N	N	A	A	A	A	R	A	A	R	N	A	A	A	A	R	A	A	R	A	A	R	A	R	N	A	A	A	A	A	A	R	N	N	A
S46_3257234	C/T	46	3257234	+	NA	NA	NA	NA	NA	NA	C	C	C	C	N	C	Y	C	C	C	Y	C	C	Y	T	C	C	Y	C	C	Y	C	Y	C	C	T	C	C	C	Y	C	C	C	C	C	Y	C	C	C
S46_3263628	G/C	46	3263628	+	NA	NA	NA	NA	NA	NA	G	G	G	G	G	G	S	G	G	G	S	G	G	S	S	G	G	S	G	S	G	G	S	G	G	S	G	S	G	S	G	G	G	G	G	S	S	G	G
S46_3276846	A/T	46	3276846	+	NA	NA	NA	NA	NA	NA	A	A	A	A	W	A	W	A	A	A	W	A	A	W	W	A	A	W	A	W	A	A	W	A	A	W	A	W	A	W	A	A	A	A	A	W	W	W	A
S46_3291355	G/A	46	3291355	+	NA	NA	NA	NA	NA	NA	G	G	G	G	G	G	G	G	G	G	G	G	G	G	N	G	G	G	G	G	G	G	G	G	G	G	G	G	G	G	G	G	G	G	G	G	G	G	G
S46_3304180	A/G	46	3304180	+	NA	NA	NA	NA	NA	NA	A	A	A	A	G	A	R	A	A	A	R	A	A	R	R	A	A	R	A	R	R	A	R	A	A	R	A	R	A	R	A	A	A	A	A	R	R	R	A
S46_3316350	C/T	46	3316350	+	NA	NA	NA	NA	NA	NA	C	C	C	C	Y	C	C	C	C	C	C	C	Y	Y	C	Y	C	C	Y	C	C	C	C	C	C	C	Y	C	Y	Y	C	Y	C	C	Y	C	C	C	C
S46_3335505	T/C	46	3335505	+	NA	NA	NA	NA	NA	NA	N	T	T	T	Y	T	Y	T	T	N	C	T	T	C	Y	T	T	Y	T	C	Y	T	C	T	T	C	T	Y	T	Y	T	T	N	T	T	C	C	Y	T
S46_3351961	C/G/A	46	3351961	+	NA	NA	NA	NA	NA	NA	C	C	C	C	M	C	S	C	C	C	S	C	C	S	S	C	C	S	C	S	S	C	S	C	C	S	C	S	C	S	C	C	C	C	C	S	S	M	C
S46_3362719	A/G	46	3362719	+	NA	NA	NA	NA	NA	NA	A	A	A	A	A	A	R	A	A	A	R	A	A	R	G	A	A	R	A	R	A	A	R	A	A	R	A	R	A	R	A	A	A	A	A	R	R	A	A
S46_3362908	G/A	46	3362908	+	NA	NA	NA	NA	NA	NA	G	G	G	G	G	G	R	G	G	G	R	G	G	A	G	G	G	A	G	R	R	G	R	G	G	R	G	A	G	A	G	G	G	G	G	R	R	G	G
S46_3381616	G/C	46	3381616	+	NA	NA	NA	NA	NA	NA	G	G	G	G	G	G	S	G	G	N	S	G	G	S	S	G	G	S	G	S	G	G	S	G	G	S	G	S	G	G	G	G	G	G	G	S	S	S	G
S46_3387777	C/G	46	3387777	+	NA	NA	NA	NA	NA	NA	C	C	C	C	C	C	S	C	C	C	S	C	C	S	N	C	C	C	C	S	C	C	S	C	C	S	C	S	C	S	C	C	C	C	C	S	S	C	C
S46_3394553	G/A	46	3394553	+	NA	NA	NA	NA	NA	NA	G	G	G	G	N	G	A	G	G	G	R	G	G	R	A	G	G	R	G	R	R	G	R	G	G	R	G	R	G	N	G	G	G	N	G	R	A	R	G
S46_3394672	T/C	46	3394672	+	NA	NA	NA	NA	NA	NA	N	T	T	T	N	T	Y	T	N	T	C	T	T	Y	N	T	T	Y	T	Y	T	T	Y	T	N	Y	T	Y	T	T	T	T	T	T	T	Y	Y	Y	T
S46_3400913	C/G	46	3400913	+	NA	NA	NA	NA	NA	NA	C	C	C	C	C	N	G	C	C	C	S	N	C	C	N	C	C	C	C	S	S	C	S	C	C	S	C	C	C	N	C	C	C	N	C	S	C	C	C
S46_3412562	G/C	46	3412562	+	NA	NA	NA	NA	NA	NA	G	G	G	G	N	G	C	G	G	G	S	G	G	S	S	G	G	S	G	S	G	G	S	G	G	S	G	S	G	G	G	G	G	G	G	C	S	S	G
S46_3417585	A/C	46	3417585	+	NA	NA	NA	NA	NA	NA	A	A	A	A	M	A	M	A	A	A	M	A	A	M	M	A	A	M	A	M	M	A	M	A	A	M	A	M	A	M	A	A	A	A	A	M	M	M	A
S46_3427797	A/G	46	3427797	+	NA	NA	NA	NA	NA	NA	A	A	A	A	G	A	N	A	A	A	R	A	A	R	N	A	A	R	A	R	A	N	R	A	A	R	A	R	A	R	A	A	A	A	A	R	R	A	R
S46_3427901	T/A	46	3427901	+	NA	NA	NA	NA	NA	NA	N	T	T	T	T	N	W	T	T	T	W	T	T	W	N	T	T	A	T	W	W	T	W	T	T	W	T	W	T	W	T	T	T	N	T	W	W	W	W
S46_3445896	G/T	46	3445896	+	NA	NA	NA	NA	NA	NA	G	G	G	G	G	G	K	G	G	G	K	G	G	K	N	G	G	G	G	K	G	G	K	G	G	K	G	K	G	G	G	G	G	G	G	K	K	K	K
S46_3446728	T	46	3446728	+	NA	NA	NA	NA	NA	NA	T	T	T	T	T	T	T	T	T	T	T	T	T	T	T	T	T	T	T	T	T	T	T	T	T	T	T	T	T	T	T	T	T	T	T	T	T	T	T
S46_3447355	T/G	46	3447355	+	NA	NA	NA	NA	NA	NA	T	T	T	T	G	T	G	T	T	N	K	N	T	K	N	T	T	N	T	K	T	T	K	T	T	G	T	K	T	G	T	T	T	T	T	T	T	K	K
S46_3449044	G/T	46	3449044	+	NA	NA	NA	NA	NA	NA	G	G	G	G	K	G	K	G	G	G	K	G	G	K	T	G	G	K	G	K	K	G	K	G	G	K	G	K	G	K	G	G	G	G	G	K	K	T	K
S46_3450150	G/A	46	3450150	+	NA	NA	NA	NA	NA	NA	G	G	G	G	G	G	G	G	G	G	G	G	G	G	G	G	G	G	G	G	G	G	G	G	G	G	G	G	G	G	G	G	G	G	G	G	G	G	G
S46_3452760	T/G	46	3452760	+	NA	NA	NA	NA	NA	NA	T	T	T	T	K	T	K	T	T	T	K	T	T	K	K	T	T	K	T	K	T	T	K	T	T	K	T	K	T	K	T	T	T	T	T	K	K	K	K
S46_3458792	A/C	46	3458792	+	NA	NA	NA	NA	NA	NA	A	A	A	A	M	A	M	A	A	A	M	A	A	M	A	A	A	M	A	M	A	A	M	A	A	M	A	M	A	M	A	A	A	A	A	M	M	M	M
S46_3459555	C/A	46	3459555	+	NA	NA	NA	NA	NA	NA	C	C	C	C	A	N	M	C	C	C	M	C	C	A	C	C	C	A	C	M	M	C	M	C	C	M	C	M	C	N	C	C	C	C	C	M	M	A	M
S46_3462887	T/C	46	3462887	+	NA	NA	NA	NA	NA	NA	N	T	T	T	T	N	T	T	T	T	Y	T	T	N	N	N	T	Y	T	Y	T	T	Y	T	T	Y	T	T	T	T	T	T	N	T	T	Y	C	Y	Y
S46_3463003	C/T	46	3463003	+	NA	NA	NA	NA	NA	NA	C	C	C	C	N	C	T	C	C	C	Y	C	C	C	N	C	C	Y	C	Y	C	C	Y	C	C	Y	C	Y	C	Y	C	C	C	C	C	Y	Y	T	Y
S46_3463450	C/A	46	3463450	+	NA	NA	NA	NA	NA	NA	C	C	C	C	N	C	M	C	C	C	M	C	C	M	N	C	C	A	C	M	C	C	C	C	C	M	C	M	N	A	C	C	C	C	C	M	M	C	M
S46_3493098	C/T	46	3493098	+	NA	NA	NA	NA	NA	NA	C	C	C	C	N	C	T	C	C	C	T	C	C	T	Y	C	C	T	C	T	T	C	T	C	C	T	C	T	C	T	C	C	C	C	C	T	T	T	T
S46_3493666	A/T	46	3493666	+	NA	NA	NA	NA	NA	NA	A	A	A	A	W	A	W	A	A	A	W	A	A	W	W	A	A	W	A	W	W	A	W	A	A	W	A	W	A	W	A	A	A	A	A	W	W	W	W
S46_3493922	A/T	46	3493922	+	NA	NA	NA	NA	NA	NA	N	A	A	A	N	A	T	A	A	A	A	A	A	W	T	A	A	W	A	W	W	A	W	A	A	W	A	W	N	A	A	N	A	A	A	W	W	A	W
S46_3494376	G/A	46	3494376	+	NA	NA	NA	NA	NA	NA	G	G	G	G	G	G	G	G	G	G	R	G	G	A	A	G	G	R	G	A	R	G	R	G	G	R	G	R	G	A	G	G	G	G	G	R	R	R	R
S46_3494512	T/C	46	3494512	+	NA	NA	NA	NA	NA	NA	T	T	T	T	C	T	Y	T	T	T	Y	N	T	Y	N	T	T	C	T	Y	Y	T	T	T	T	Y	T	Y	T	Y	T	T	T	T	T	Y	T	T	Y
S46_3494731	A/G	46	3494731	+	NA	NA	NA	NA	NA	NA	A	A	A	A	R	A	A	A	A	A	A	A	A	A	A	N	A	A	A	A	A	A	A	A	A	A	A	A	A	A	A	A	A	A	A	A	A	R	R
S46_3495672	G/A	46	3495672	+	NA	NA	NA	NA	NA	NA	G	G	G	G	R	G	R	G	G	G	R	G	G	G	R	G	G	R	G	G	R	G	R	G	G	R	G	R	G	G	G	G	G	G	G	R	R	R	R
S46_3495789	G/C	46	3495789	+	NA	NA	NA	NA	NA	NA	G	G	G	G	N	G	S	G	G	G	S	G	G	G	N	G	G	G	G	S	G	G	S	G	G	S	G	S	G	S	G	G	G	G	G	S	S	G	G
S46_3498915	T/C	46	3498915	+	NA	NA	NA	NA	NA	NA	T	T	T	T	N	T	Y	T	T	T	Y	T	T	Y	N	T	T	C	T	Y	Y	T	Y	T	T	Y	T	Y	T	Y	T	T	T	T	T	Y	Y	Y	Y
S46_3519232	T/G	46	3519232	+	NA	NA	NA	NA	NA	NA	T	T	T	T	K	T	K	T	T	T	K	T	T	K	K	T	T	K	T	K	K	T	K	T	T	K	T	K	T	K	T	T	T	T	T	K	K	K	K
S46_3519391	A/G	46	3519391	+	NA	NA	NA	NA	NA	NA	A	A	A	A	R	A	R	A	A	A	R	A	A	R	R	A	A	R	A	R	R	A	R	A	A	R	A	R	A	R	A	A	A	A	A	R	R	R	R
S46_3548726	G/C	46	3548726	+	NA	NA	NA	NA	NA	NA	G	G	G	G	G	G	S	G	G	G	S	G	G	S	N	G	G	S	G	S	G	G	S	G	G	S	G	S	G	S	G	G	G	G	G	S	S	S	S
S46_3548834	G/C	46	3548834	+	NA	NA	NA	NA	NA	NA	G	G	G	G	G	N	S	G	G	G	S	G	G	S	G	G	G	S	G	S	S	G	S	G	G	S	G	S	G	S	G	G	G	G	G	S	S	S	S
S46_3559379	G/A	46	3559379	+	NA	NA	NA	NA	NA	NA	G	G	G	G	R	G	R	G	G	G	R	G	G	R	G	G	G	A	G	R	G	G	R	G	G	R	G	R	G	R	G	G	G	G	G	R	R	R	R
S46_3577783	T/C	46	3577783	+	NA	NA	NA	NA	NA	NA	T	T	T	T	N	T	Y	T	T	T	Y	T	T	Y	N	T	N	T	T	Y	Y	T	Y	T	T	Y	T	Y	T	Y	T	T	T	T	T	Y	T	Y	Y
S46_3577930	T/G	46	3577930	+	NA	NA	NA	NA	NA	NA	N	T	T	N	T	N	T	N	T	T	K	N	N	G	N	T	T	T	T	K	T	T	K	T	T	T	T	G	T	N	T	T	T	T	T	K	T	G	K
S46_3595126	T/C	46	3595126	+	NA	NA	NA	NA	NA	NA	T	T	T	T	T	T	T	T	T	T	T	T	T	T	T	T	T	T	T	T	T	T	T	T	T	T	T	T	T	T	T	T	T	T	T	T	T	T	T
S46_3602907	A/C	46	3602907	+	NA	NA	NA	NA	NA	NA	A	A	A	A	C	A	M	A	A	A	M	A	A	M	M	A	A	M	A	M	M	A	M	A	A	M	A	M	A	M	A	A	A	A	A	M	M	M	M
S46_3603055	A/G	46	3603055	+	NA	NA	NA	NA	NA	NA	A	A	A	A	N	A	R	A	A	A	R	A	A	A	R	A	A	R	A	R	R	A	R	A	A	R	A	R	A	R	A	A	A	A	A	R	A	R	R
S46_3614958	A/C	46	3614958	+	NA	NA	NA	NA	NA	NA	N	A	A	A	A	N	C	A	A	A	A	A	A	M	N	A	A	M	A	M	A	A	M	A	A	C	A	C	A	M	A	N	A	A	A	M	M	M	M
S46_3617635	T/C	46	3617635	+	NA	NA	NA	NA	NA	NA	T	T	T	T	T	N	T	T	T	N	T	T	T	T	N	T	T	N	T	T	T	T	T	T	T	T	T	T	N	N	T	T	T	T	T	T	T	Y	Y
S46_3650742	A/G	46	3650742	+	NA	NA	NA	NA	NA	NA	A	A	A	A	A	A	R	A	A	A	R	A	A	R	A	A	A	R	A	R	A	A	R	A	A	R	A	R	A	R	A	A	A	A	A	R	R	R	R
S46_3712731	A/G	46	3712731	+	NA	NA	NA	NA	NA	NA	A	A	A	A	R	A	R	A	A	A	R	A	A	R	R	A	A	R	A	R	A	A	R	A	A	R	A	R	A	R	A	A	A	A	A	R	R	R	R
S46_3713538	C/T	46	3713538	+	NA	NA	NA	NA	NA	NA	C	C	C	C	Y	C	Y	C	C	C	Y	C	C	Y	Y	C	C	Y	C	Y	Y	C	Y	C	C	Y	C	Y	C	Y	C	C	C	C	C	Y	Y	Y	Y
S46_3722704	C/T	46	3722704	+	NA	NA	NA	NA	NA	NA	C	C	C	C	Y	C	Y	C	C	C	Y	C	C	Y	Y	C	C	Y	C	Y	Y	C	Y	C	C	Y	C	Y	C	Y	C	C	C	C	C	Y	Y	Y	Y
S46_3723108	C/G	46	3723108	+	NA	NA	NA	NA	NA	NA	C	C	C	C	S	C	S	C	C	C	S	C	C	S	S	C	C	S	C	S	C	C	S	C	C	S	C	S	C	S	C	C	C	C	C	S	S	S	S
S46_3735149	A/C	46	3735149	+	NA	NA	NA	NA	NA	NA	A	A	A	A	A	A	M	A	A	N	M	A	A	M	C	A	A	M	A	M	M	A	M	A	A	M	A	M	A	M	A	A	A	A	A	M	M	M	M
S46_3759365	C/T	46	3759365	+	NA	NA	NA	NA	NA	NA	C	C	C	C	N	C	Y	C	C	C	Y	C	C	Y	N	C	C	Y	C	Y	Y	C	Y	C	C	T	C	Y	C	Y	C	C	C	C	C	Y	Y	C	Y
S46_3783395	C/T	46	3783395	+	NA	NA	NA	NA	NA	NA	C	C	C	C	Y	C	Y	C	C	C	Y	C	C	Y	N	C	C	Y	C	Y	C	C	Y	C	C	Y	C	Y	C	Y	C	C	C	C	C	Y	Y	Y	Y
S46_3784931	A/C	46	3784931	+	NA	NA	NA	NA	NA	NA	A	A	A	A	A	A	M	A	A	A	M	A	A	M	M	A	A	M	A	M	M	A	M	A	A	M	A	M	A	M	A	A	A	A	A	M	M	A	A
S46_3808169	G/A	46	3808169	+	NA	NA	NA	NA	NA	NA	G	G	G	G	A	G	R	G	G	G	R	G	G	R	N	G	G	R	G	R	G	G	R	G	G	R	G	R	G	R	G	G	G	G	G	R	R	R	R
S46_3811121	T/G	46	3811121	+	NA	NA	NA	NA	NA	NA	T	T	N	T	K	T	T	T	T	T	K	T	T	K	N	T	T	T	T	K	K	T	K	T	T	K	T	K	T	N	T	T	T	T	T	K	K	K	K
S46_3811394	T/C	46	3811394	+	NA	NA	NA	NA	NA	NA	T	T	T	T	T	T	T	T	T	T	T	T	T	T	T	T	T	T	T	T	T	T	T	T	T	T	T	T	T	T	T	T	T	T	T	T	T	Y	Y
S46_3818833	T/A	46	3818833	+	NA	NA	NA	NA	NA	NA	T	T	T	T	T	T	W	T	T	T	T	T	T	W	N	T	T	W	T	W	W	T	W	T	T	W	T	W	T	W	T	T	T	T	T	W	W	W	W
S46_3834006	G/A	46	3834006	+	NA	NA	NA	NA	NA	NA	G	G	G	G	R	G	R	G	G	G	G	G	G	R	R	G	G	R	G	R	G	G	R	G	G	R	G	R	G	R	G	G	G	G	G	R	R	R	R
S46_3835884	G/C	46	3835884	+	NA	NA	NA	NA	NA	NA	G	G	G	G	N	G	C	G	N	G	G	G	G	C	C	G	G	G	G	S	G	G	S	G	G	S	G	S	G	C	G	G	N	G	G	S	S	S	S
S46_3842081	G/A	46	3842081	+	NA	NA	NA	NA	NA	NA	G	G	G	G	R	G	R	G	G	G	G	G	G	R	R	G	G	R	G	R	R	G	R	G	G	R	G	R	G	R	G	G	G	G	G	R	R	R	R
S46_3842893	C/A	46	3842893	+	NA	NA	NA	NA	NA	NA	C	C	C	C	M	C	M	C	C	C	C	C	C	M	N	C	C	M	C	M	C	C	M	C	C	M	C	M	C	M	C	C	C	C	C	M	M	M	M
S46_3843034	C/G	46	3843034	+	NA	NA	NA	NA	NA	NA	C	C	C	C	S	C	S	C	C	C	C	C	C	S	S	C	C	S	C	S	S	C	S	C	C	S	C	S	C	S	C	C	C	C	C	S	S	S	S
S46_3843232	C/T	46	3843232	+	NA	NA	NA	NA	NA	NA	C	C	C	C	Y	C	Y	C	C	C	C	C	C	Y	N	C	C	Y	C	Y	C	C	C	C	C	Y	C	T	C	C	C	C	C	C	C	Y	Y	Y	Y
S46_3847968	A/G	46	3847968	+	NA	NA	NA	NA	NA	NA	N	A	A	A	R	A	R	A	A	N	A	A	A	R	R	A	A	R	A	R	R	A	G	A	A	R	A	R	A	R	A	A	N	A	A	N	G	R	R
S46_3852692	T/G	46	3852692	+	NA	NA	NA	NA	NA	NA	T	T	T	T	K	T	K	T	T	T	T	T	T	K	T	T	T	K	T	K	K	T	K	T	T	K	T	K	T	K	T	T	T	T	T	K	K	K	K
S46_3853147	A/G	46	3853147	+	NA	NA	NA	NA	NA	NA	A	A	A	A	G	A	R	A	A	A	A	A	N	A	N	A	A	A	N	G	A	A	G	A	A	R	A	G	A	R	A	A	A	A	A	R	R	G	R
S46_3853466	A/C	46	3853466	+	NA	NA	NA	NA	NA	NA	A	A	A	A	C	N	M	A	A	A	A	A	A	M	N	A	A	A	A	M	A	A	M	A	A	M	A	M	A	A	A	A	N	A	A	M	M	M	M
S46_3853581	G/A	46	3853581	+	NA	NA	NA	NA	NA	NA	G	G	G	G	R	G	R	G	G	G	G	G	G	A	G	G	G	R	G	R	G	G	R	G	G	R	G	R	N	R	G	G	G	G	G	R	R	R	R
S46_3856740	C/T	46	3856740	+	NA	NA	NA	NA	NA	NA	C	C	C	C	Y	C	Y	C	C	C	C	C	C	Y	Y	C	C	Y	C	Y	C	C	Y	C	C	Y	C	Y	C	Y	C	C	C	C	C	Y	Y	Y	Y
S46_3857492	A/G	46	3857492	+	NA	NA	NA	NA	NA	NA	A	A	A	A	R	A	R	A	A	A	A	A	A	R	R	A	A	R	A	R	A	A	R	A	A	R	A	R	A	R	A	A	A	A	A	R	R	R	R
S46_3862196	C/T	46	3862196	+	NA	NA	NA	NA	NA	NA	C	C	C	C	Y	C	Y	C	C	C	C	C	C	Y	Y	C	C	Y	C	Y	C	C	Y	C	C	Y	C	Y	C	Y	C	C	C	C	C	Y	Y	Y	Y
S46_3862619	G/A	46	3862619	+	NA	NA	NA	NA	NA	NA	G	G	G	G	A	G	R	G	G	G	G	G	G	R	N	G	G	R	G	R	R	G	R	G	G	R	G	R	G	R	G	G	G	G	G	R	A	R	R
S46_3862771	C/A	46	3862771	+	NA	NA	NA	NA	NA	NA	C	C	C	C	M	N	M	C	C	C	C	C	C	M	M	C	C	M	C	M	C	C	M	C	C	M	C	M	C	M	C	C	C	C	C	M	M	M	M
S46_3900527	G/A	46	3900527	+	NA	NA	NA	NA	NA	NA	G	G	G	G	R	G	R	G	G	G	G	G	G	R	R	G	G	R	G	R	R	G	R	G	G	R	G	R	G	R	G	G	G	G	G	R	R	R	R
S47_43634	G/T	47	43634	+	NA	NA	NA	NA	NA	NA	G	K	G	K	G	G	G	G	K	G	G	G	G	G	G	G	K	G	G	G	G	G	G	G	G	G	G	T	G	N	G	G	G	G	K	K	G	G	K
S47_286699	T	47	286699	+	NA	NA	NA	NA	NA	NA	T	T	T	T	T	T	T	T	T	T	T	T	T	T	T	T	T	T	T	T	T	T	T	T	T	T	T	T	T	T	T	T	T	T	T	T	T	T	T
S47_297662	T/G	47	297662	+	NA	NA	NA	NA	NA	NA	N	T	T	T	K	K	G	T	K	T	K	T	T	T	K	T	K	T	K	T	K	T	G	K	T	G	K	K	T	T	T	K	K	K	K	K	K	K	T
S47_376088	T/C	47	376088	+	NA	NA	NA	NA	NA	NA	T	T	T	T	C	N	Y	T	Y	T	Y	T	T	T	Y	T	Y	T	Y	T	Y	T	Y	Y	T	Y	Y	Y	T	T	T	Y	Y	Y	Y	Y	Y	Y	T
S47_376797	T/G	47	376797	+	NA	NA	NA	NA	NA	NA	T	T	T	T	K	K	K	T	K	T	K	T	T	T	T	T	K	T	K	T	T	T	K	K	T	K	K	K	T	T	T	K	K	K	K	K	K	T	T
S47_382455	A/T	47	382455	+	NA	NA	NA	NA	NA	NA	A	A	A	A	W	A	W	A	W	A	W	A	A	A	W	A	W	A	W	A	W	A	W	W	A	W	W	W	A	A	A	T	W	W	W	W	W	W	A
S47_386942	A	47	386942	+	NA	NA	NA	NA	NA	NA	A	A	A	A	A	A	A	A	A	A	A	A	A	A	A	A	A	A	A	A	A	A	A	A	A	A	A	A	A	A	A	A	A	A	A	A	A	A	A
S47_411205	C/T	47	411205	+	NA	NA	NA	NA	NA	NA	C	C	C	C	Y	Y	Y	C	Y	C	Y	C	C	C	Y	C	Y	C	Y	C	C	C	C	Y	C	Y	Y	Y	C	C	C	Y	C	Y	Y	Y	Y	Y	C
S47_454226	A/T	47	454226	+	NA	NA	NA	NA	NA	NA	A	A	A	A	W	A	W	A	W	A	W	A	A	A	T	A	W	A	W	A	W	A	W	W	A	W	W	W	A	A	A	W	W	W	W	W	W	W	A
S47_486424	G/A	47	486424	+	NA	NA	NA	NA	NA	NA	G	G	G	G	R	R	R	G	R	G	R	G	G	G	R	G	R	G	R	G	R	G	R	R	G	R	R	R	G	G	G	R	R	R	R	R	R	R	G
S47_532128	T/G	47	532128	+	NA	NA	NA	NA	NA	NA	T	T	T	T	K	K	K	T	K	T	K	T	T	T	K	T	K	T	K	T	K	T	K	K	T	K	K	K	T	T	T	K	K	K	K	K	K	K	T
S47_563446	C/T	47	563446	+	NA	NA	NA	NA	NA	NA	C	C	C	C	N	N	Y	C	Y	C	Y	N	C	C	N	N	T	N	Y	C	C	C	Y	T	C	Y	C	T	C	N	C	Y	T	Y	Y	Y	Y	T	C
S47_599773	T/A	47	599773	+	NA	NA	NA	NA	NA	NA	T	T	T	T	T	A	T	T	T	T	W	T	T	T	N	T	W	T	A	T	W	T	W	W	T	W	A	W	T	N	T	T	W	A	A	W	W	W	T
S47_599915	T/G	47	599915	+	NA	NA	NA	NA	NA	NA	T	T	T	T	G	N	T	T	K	T	K	T	T	T	N	T	K	T	K	T	T	T	T	K	T	K	G	K	T	T	T	K	T	T	K	K	K	T	T
S47_629742	C/T	47	629742	+	NA	NA	NA	NA	NA	NA	C	C	N	C	C	N	Y	C	C	C	Y	C	C	C	C	C	Y	C	Y	C	Y	C	Y	Y	C	C	C	N	C	C	C	Y	Y	C	Y	Y	C	Y	C
S47_629842	A/G	47	629842	+	NA	NA	NA	NA	NA	NA	N	A	A	A	N	N	R	A	R	A	R	A	A	A	G	A	A	A	G	A	A	A	R	R	A	A	R	R	A	A	A	R	R	A	R	R	A	R	A
S47_638249	A/T	47	638249	+	NA	NA	NA	NA	NA	NA	A	A	A	A	W	A	A	A	A	A	A	A	A	A	A	A	A	A	A	A	A	A	A	W	A	A	W	A	A	A	A	A	A	A	A	A	W	W	A
S47_642543	C/T	47	642543	+	NA	NA	NA	NA	NA	NA	C	C	C	C	Y	Y	Y	C	Y	C	Y	C	C	C	T	C	Y	C	Y	C	C	C	Y	Y	C	C	Y	Y	C	C	C	Y	Y	Y	Y	Y	Y	C	C
S47_645270	G/A	47	645270	+	NA	NA	NA	NA	NA	NA	G	G	G	G	R	A	R	G	R	G	R	G	G	G	A	G	R	G	R	G	R	G	R	R	G	G	R	R	G	G	G	R	R	R	R	R	R	R	G
S47_645412	C/T	47	645412	+	NA	NA	NA	NA	NA	NA	C	C	C	C	Y	Y	Y	C	Y	C	Y	C	C	C	Y	C	Y	C	Y	C	Y	C	Y	Y	C	C	Y	Y	C	C	C	Y	Y	Y	Y	Y	Y	Y	C
S47_670173	A/G	47	670173	+	NA	NA	NA	NA	NA	NA	A	A	A	A	A	G	R	A	R	A	A	A	A	A	A	A	A	A	R	A	G	A	R	A	A	N	G	G	A	A	A	A	R	R	A	R	R	A	A
S47_670280	T/A	47	670280	+	NA	NA	NA	NA	NA	NA	T	T	T	T	A	W	W	T	W	T	W	T	T	T	T	T	W	T	W	T	W	T	W	W	T	T	W	W	T	T	T	W	W	W	T	W	W	T	T
S47_671201	A/C	47	671201	+	NA	NA	NA	NA	NA	NA	N	A	A	A	N	N	M	A	M	A	M	A	A	N	M	A	M	A	M	A	A	A	M	M	A	A	M	C	A	A	A	M	M	M	M	M	M	M	A
S47_704976	G/T	47	704976	+	NA	NA	NA	NA	NA	NA	G	G	G	G	T	G	K	G	K	G	K	G	G	G	N	G	K	G	K	G	K	G	K	K	G	G	K	K	G	N	G	G	K	T	K	K	K	K	G
S47_722655	C/A	47	722655	+	NA	NA	NA	NA	NA	NA	C	C	C	C	C	M	M	C	M	C	C	C	C	C	N	C	M	C	M	C	M	C	M	C	C	C	M	M	C	C	C	C	M	M	C	M	M	C	C
S47_762060	G/A	47	762060	+	NA	NA	NA	NA	NA	NA	G	G	G	G	R	R	R	G	R	G	R	G	G	G	R	G	R	G	R	G	R	G	R	R	G	G	R	R	G	G	G	R	R	R	R	R	R	R	G
S47_762181	G/A	47	762181	+	NA	NA	NA	NA	NA	NA	G	G	G	G	A	G	G	G	G	G	G	G	G	G	G	G	R	G	G	G	R	G	G	G	G	G	G	G	G	G	G	G	G	G	G	G	G	G	G
S47_762306	C/T	47	762306	+	NA	NA	NA	NA	NA	NA	C	C	C	C	C	T	Y	C	Y	C	Y	C	C	C	N	C	C	C	C	C	Y	C	C	Y	C	C	Y	C	C	C	C	Y	T	Y	Y	Y	Y	C	C
S47_772928	A	47	772928	+	NA	NA	NA	NA	NA	NA	A	A	A	A	A	A	A	A	A	A	A	A	A	A	A	A	A	A	A	A	A	A	A	A	A	A	A	A	A	A	A	A	A	A	A	A	A	A	A
S47_779784	G/A	47	779784	+	NA	NA	NA	NA	NA	NA	G	G	G	G	A	A	R	G	R	G	R	G	G	G	R	G	R	G	R	G	R	G	R	R	G	G	R	R	G	G	G	R	R	R	R	R	R	R	G
S47_810543	C/A	47	810543	+	NA	NA	NA	NA	NA	NA	C	C	C	C	M	M	M	C	M	C	M	C	C	C	M	C	M	C	M	C	M	C	M	M	C	C	M	M	C	C	C	M	M	M	M	M	M	M	C
S47_819135	G/C	47	819135	+	NA	NA	NA	NA	NA	NA	G	G	G	G	S	G	G	G	G	G	S	G	G	G	G	G	G	G	G	G	G	G	G	S	G	G	G	G	G	G	G	S	G	G	S	G	G	S	G
S47_819800	C/A	47	819800	+	NA	NA	NA	NA	NA	NA	C	C	C	C	M	A	M	C	M	C	A	C	C	C	N	C	M	C	M	C	A	C	M	M	C	C	M	C	C	C	C	C	M	M	M	M	A	M	C
S47_827280	G/A	47	827280	+	NA	NA	NA	NA	NA	NA	G	G	G	G	R	R	R	G	R	G	R	G	G	G	R	G	R	G	R	G	R	G	R	R	G	G	R	R	G	G	G	R	R	R	R	R	R	R	G
S47_827381	A/T	47	827381	+	NA	NA	NA	NA	NA	NA	A	A	N	A	N	A	W	A	W	A	W	A	A	A	N	N	W	A	A	A	N	A	W	A	A	A	N	W	A	A	A	A	T	W	W	W	A	N	A
S47_862998	G/A	47	862998	+	NA	NA	NA	NA	NA	NA	G	G	G	G	R	R	R	G	R	G	R	G	G	G	R	G	R	G	R	G	G	G	R	R	G	G	R	R	G	G	G	R	R	R	R	R	R	R	G
S47_869586	G/A	47	869586	+	NA	NA	NA	NA	NA	NA	G	G	G	G	A	R	R	G	R	G	R	G	G	G	R	G	R	G	G	G	G	G	R	R	G	G	R	R	G	G	G	R	R	R	R	R	R	A	G
S47_881239	C/A	47	881239	+	NA	NA	NA	NA	NA	NA	C	C	C	C	C	C	M	C	M	C	M	C	C	C	M	C	M	C	M	C	C	C	M	M	C	C	M	M	C	C	C	M	M	A	M	M	M	M	C
S47_910296	A/G	47	910296	+	NA	NA	NA	NA	NA	NA	A	A	A	A	R	N	R	A	G	A	R	A	A	A	N	A	R	A	R	A	R	A	R	R	A	A	R	R	A	A	A	R	R	R	R	R	R	R	A
S47_910716	C/T	47	910716	+	NA	NA	NA	NA	NA	NA	C	C	C	C	Y	Y	Y	C	Y	C	Y	C	C	C	Y	C	Y	C	Y	C	Y	C	Y	Y	C	C	Y	Y	C	C	C	Y	Y	Y	Y	Y	Y	Y	C
S47_1017262	G/C	47	1017262	+	NA	NA	NA	NA	NA	NA	S	S	C	S	N	N	G	C	G	S	G	S	G	S	N	S	C	S	S	S	S	S	S	S	S	S	S	N	S	S	S	C	C	S	S	S	C	G	S
S47_1025512	A/T	47	1025512	+	NA	NA	NA	NA	NA	NA	A	A	A	A	W	N	A	A	A	A	W	A	A	A	N	A	A	A	A	A	A	A	A	W	A	A	A	N	A	A	A	W	A	A	W	A	A	W	A
S47_1039195	C/T	47	1039195	+	NA	NA	NA	NA	NA	NA	C	C	C	C	Y	C	C	C	C	C	Y	C	C	C	C	C	C	C	C	C	C	C	C	Y	C	C	C	C	C	C	C	Y	C	C	Y	C	C	C	C
S47_1039578	C/A	47	1039578	+	NA	NA	NA	NA	NA	NA	C	C	C	C	C	N	A	C	M	C	M	C	C	C	N	C	M	C	M	C	C	C	M	M	C	C	C	M	C	N	C	C	M	M	M	M	M	M	C
S47_1050058	T/A	47	1050058	+	NA	NA	NA	NA	NA	NA	T	T	T	T	W	W	W	T	W	T	W	T	T	T	W	T	W	T	W	T	W	T	W	W	T	T	W	W	T	T	T	W	W	W	W	W	W	W	T
S47_1050865	G/A	47	1050865	+	NA	NA	NA	NA	NA	NA	G	G	G	G	R	R	R	G	R	G	R	G	G	G	R	G	R	G	R	G	R	G	R	R	G	G	R	R	G	G	G	R	R	R	R	R	R	R	G
S47_1060270	T/C	47	1060270	+	NA	NA	NA	NA	NA	NA	T	T	T	T	T	N	T	T	T	T	T	T	T	T	N	T	Y	T	C	T	Y	T	Y	Y	T	T	Y	T	T	T	T	Y	Y	Y	Y	Y	Y	C	T
S47_1060382	T/C	47	1060382	+	NA	NA	NA	NA	NA	NA	T	T	T	T	C	T	Y	T	Y	T	Y	T	T	T	C	T	Y	T	Y	T	T	T	Y	Y	T	T	Y	Y	T	T	T	Y	C	T	Y	Y	C	C	T
S47_1062350	T/C	47	1062350	+	NA	NA	NA	NA	NA	NA	T	T	T	T	Y	C	Y	T	Y	T	C	T	T	N	N	N	Y	N	Y	T	Y	T	Y	C	T	T	Y	C	N	T	T	Y	C	Y	T	Y	C	C	T
S47_1062526	A/G	47	1062526	+	NA	NA	NA	NA	NA	NA	A	A	A	A	A	R	R	A	R	A	R	A	A	A	A	A	R	A	G	A	R	A	R	R	A	A	R	R	A	A	A	R	R	R	R	R	R	R	A
S47_1108604	G/C	47	1108604	+	NA	NA	NA	NA	NA	NA	N	G	G	G	S	G	S	G	N	G	S	G	G	G	G	G	S	G	S	G	N	G	S	S	G	G	S	S	N	G	G	N	S	G	S	S	C	C	G
S47_1120626	A/T	47	1120626	+	NA	NA	NA	NA	NA	NA	A	A	A	A	A	W	W	A	W	A	A	A	A	A	W	A	W	A	W	A	W	A	W	A	A	A	W	W	A	A	A	A	W	W	A	W	W	A	A
S47_1123238	T/A	47	1123238	+	NA	NA	NA	NA	NA	NA	T	T	T	T	T	N	W	T	T	T	T	T	T	T	T	T	T	T	T	T	T	T	T	T	T	T	T	T	T	T	T	T	T	T	T	T	W	T	T
S47_1135729	A/G	47	1135729	+	NA	NA	NA	NA	NA	NA	A	A	A	A	R	R	R	A	R	A	R	A	A	A	R	A	R	A	R	A	R	A	R	R	A	A	R	R	A	A	A	R	R	R	R	R	R	R	A
S47_1165514	A	47	1165514	+	NA	NA	NA	NA	NA	NA	A	A	A	A	A	A	A	A	A	A	A	A	A	A	A	A	A	A	A	A	A	A	A	A	A	A	A	A	A	A	A	A	A	A	A	A	A	A	A
S47_1228710	C/T	47	1228710	+	NA	NA	NA	NA	NA	NA	C	C	C	C	C	N	N	C	Y	C	C	C	N	C	N	C	T	C	T	C	C	C	Y	C	C	C	Y	Y	C	C	C	C	C	T	C	Y	T	C	C
S47_1277339	C/A	47	1277339	+	NA	NA	NA	NA	NA	NA	C	C	C	C	C	M	M	C	M	C	M	C	C	C	M	C	M	C	M	C	C	C	M	M	C	C	M	M	C	C	C	M	M	M	M	M	M	M	C
S47_1392569	T/G	47	1392569	+	NA	NA	NA	NA	NA	NA	T	T	T	T	K	G	K	T	K	T	K	T	T	T	K	T	K	T	G	T	K	T	K	K	T	T	K	K	T	T	T	K	K	K	K	K	K	K	T
S47_1583876	G/A	47	1583876	+	NA	NA	NA	NA	NA	NA	G	G	G	G	R	A	R	G	R	G	R	G	G	G	R	G	R	G	R	G	R	G	R	R	G	G	R	R	G	G	G	R	R	R	R	R	R	R	G
S47_1633483	G/A	47	1633483	+	NA	NA	NA	NA	NA	NA	G	G	G	G	R	A	R	G	R	G	R	G	G	G	N	G	R	G	R	G	G	G	R	R	G	G	R	R	G	G	G	G	R	R	R	R	R	R	G
S47_1651475	T/C	47	1651475	+	NA	NA	NA	NA	NA	NA	T	T	T	T	T	Y	Y	T	T	T	T	T	T	T	T	T	Y	T	Y	T	Y	T	Y	T	T	T	T	Y	T	T	T	T	Y	C	T	Y	Y	T	T
S47_1683452	T/C	47	1683452	+	NA	NA	NA	NA	NA	NA	T	T	T	T	T	C	Y	T	Y	T	T	T	T	T	Y	T	Y	T	Y	T	Y	T	Y	T	T	T	Y	Y	T	T	T	T	Y	Y	T	Y	Y	T	T
S47_1716669	A/G	47	1716669	+	NA	NA	NA	NA	NA	NA	N	A	A	A	G	N	R	A	R	A	G	A	A	A	A	A	R	A	G	A	R	A	R	A	A	A	R	R	A	A	A	A	R	R	R	R	R	N	A
S47_1716781	G/A	47	1716781	+	NA	NA	NA	NA	NA	NA	G	G	G	G	N	A	R	G	G	G	G	G	G	G	R	G	R	G	R	G	R	G	R	G	G	G	G	R	G	G	G	G	R	G	G	R	R	G	G
S47_1717141	A/C	47	1717141	+	NA	NA	NA	NA	NA	NA	A	A	A	A	M	M	M	A	M	A	M	A	A	A	C	A	M	A	M	A	M	A	M	M	A	A	M	M	A	A	A	M	M	M	M	M	M	M	A
S47_1717244	G/A	47	1717244	+	NA	NA	NA	NA	NA	NA	G	G	G	G	N	A	A	G	R	G	R	G	G	G	N	N	R	G	A	G	G	G	R	R	G	G	R	R	G	G	G	R	A	G	R	R	A	R	G
[truncated: 12,770 more rows]
[truncated: 55 more columns]
