# Supplementary material for: Ultra-High-Density Genetic Maps of Jatropha curcas × Jatropha integerrima and Anchoring Jatropha curcas Genome Assembly Scaffolds
Source: MDPI journal article supplement (doi:10.3390/f14091907), 2023-09-19
Supplement: s1 [file s1 › Supplementary Table S7_Consistency of markers and LGs.xlsx]

## Sheet: Comparison_JatCur1.0 _LG_Map
Supplementary Table S7. Consistency of markers and linkage groups in our study with previous studies
Columns A, B and C: The detailed information about DNA markers and reference genome scaffolds mapped on genetic maps reported by Wu et al. 2015, King et al. (2103) and Wang et al. (2012) and reported by Wu et al. (2015 (Supplementary file tpj12761-sup-0042-datas1.xlsx)
Column D: The detail information about DNA markers and scaffolds mapped on the eleven linkage groups constructed using JatCur_1.0 reference assembly in this study
Column E: The detail information about DNA markers and scaffolds mapped on the eleven linkage groups constructed using Jat_r4.5 reference assembly in this study
	A			B		C		D		E
No.	Wu et al. 2015			King et al. 2013, Plant Biotechnol. J., pp. 1–11		Wang et al. 2012, PLoS ONE 6(8): e23632		This study: Markers derived from Wu_JatCur_1.0 reference genome		This Study: Markers derived from Jat_r4.5 reference genome
	Linkage Group	Marker	The anchored scaffold	Marker	The anchored scaffold	Marker	The anchored scaffold	Linkage Group	Marker	Linkage Group	Marker
1	LG1-1	F1-78	scaffold542	AG638	scaffold659	eSNP0894	scaffold897	LG1-1	E-AACXM-CAT04	LG1-1	E-AACXM-CAT04
2	LG1-2	X1-25	scaffold542	G121	scaffold139	eSNP0836	scaffold729	LG1-2	W_Jcuint070	LG1-2	S1326
3	LG1-3	X1-23	scaffold542	TM220	scaffold287	eSNP0815	scaffold473	LG1-3	S521_Wu	LG1-3	W_Jcuint070
4	LG1-4	X1-21	scaffold119	SNP8545	scaffold393	Jatr650	scaffold55	LG1-4	S478_Wu	LG1-4	S10192
5	LG1-5	F5-110	scaffold119	1415045|12293292	scaffold43	Jcuint220	scaffold287	LG1-5	S206_Wu	LG1-5	S3962
6	LG1-6	X1-18	scaffold119	1406534|12318635	scaffold43	eSNP0027	scaffold116	LG1-6	S202_Wu	LG1-6	S3952
7	LG1-7	E0359-7	scaffold359	SNP14944	scaffold675	Jcuint018	scaffold57	LG1-7	S681_Wu	LG1-7	S5300
8	LG1-8	E0359-2	scaffold359	1398420|12336456	scaffold675	eSNP0047	scaffold57	LG1-8	S314_Wu	LG1-8	S4164
9	LG1-9	E0359-1	scaffold359	1415612|12289973	scaffold108	Jcuint057	scaffold57	LG1-9	S139_Wu	LG1-9	S6999
10	LG1-10	E0359-6	scaffold359	1410075|12315915	scaffold108	eSNP0292	scaffold347	LG1-10	S116_Wu	LG1-10	E-ACTXM-CTA04
11	LG1-11	E1969-2	scaffold1969	G105	scaffold108	Jatr914	scaffold1061	LG1-11	E-ACTXM-CTA03a	LG1-11	S8626
12	LG1-12	E1969-3	scaffold1969	1403340|12359319	scaffold108	Jcuint070	scaffold287	LG1-12	W_Jcuint220	LG1-12	S4034
13	LG1-13	SNP1969-8	scaffold1969	1403297|12346203	scaffold108	Jcuint093	scaffold287	LG1-13	S362_Wu	LG1-13	S3608
14	LG1-14	E1969-5	scaffold1969	1409784|12321782	scaffold108	Jatr1010	scaffold264	LG1-14	S1036_Wu	LG1-14	S2130
15	LG1-15	E1969-4	scaffold1969	G24	scaffold108	Jatr472	scaffold393	LG1-15	S593_Wu	LG1-15	S11929
16	LG1-16	E1969-8	scaffold1969	G16	scaffold108	eSNP0866	scaffold675	LG1-16	S903_Wu	LG1-16	S1913
17	LG1-17	E1969-6	scaffold1969	SNP10376	scaffold108	Jatr1047	scaffold43	LG1-17	S482_Wu	LG1-17	S4982
18	LG1-18	E1969-1	scaffold1969	Jcuint349	scaffold108	Jatr309	scaffold108	LG1-18	S163_Wu	LG1-18	S4307
19	LG1-19	F1-100	scaffold108	1412160|12306486	scaffold108	eSNP0916	scaffold108	LG1-19	S494_Wu	LG1-19	S3711
20	LG1-20	X1-17	scaffold108	AG629	scaffold359	Jatr908	scaffold108	LG1-20	S57_Wu	LG1-20	S1802
21	LG1-21	F5-200	scaffold108	1403442|12346732	scaffold359	Jcuint231	scaffold108	LG1-21	S287_Wu	LG1-21	S3822
22	LG1-22	X1-12	scaffold108	1400438|12286485	scaffold359	Jatr337	scaffold108	LG1-22	S37_Wu	LG1-22	S201
23	LG1-23	X1-13	scaffold108	SNP12776	scaffold119	eSNP0273	scaffold108	LG1-23	S114_Wu	LG1-23	S1921
24	LG1-24	X1-14	scaffold108	G50	scaffold119	Jcuint253	scaffold108	LG1-24	S659_Wu	LG1-24	S1099
25	LG1-25	F4-21	scaffold108	EST10	scaffold119	Jcuint349	scaffold108	LG1-25	S268_Wu	LG1-25	S3575
26	LG1-26	X1-10	scaffold43	1409465|12332239	scaffold119	Jatr919	scaffold108	LG1-26	S355_Wu	LG1-26	S5678
27	LG1-27	E0793	scaffold793	AG612	scaffold119	eSNP0274	scaffold108	LG1-27	S55_Wu	LG1-27	S2099
28	LG1-28	E0675-3	scaffold675	1410189|12318456	scaffold119	eSNP0044	scaffold119	LG1-28	S393_Wu	LG1-28	S6778
29	LG1-29	E0675-4	scaffold675	SNP21849	scaffold119	Jatr159	scaffold119	LG1-29	S43_Wu	LG1-29	S2262
30	LG1-30	F1-37	scaffold108	SNP9980	scaffold119	eSNP0055	scaffold119	LG1-30	S264_Wu	LG1-30	S1989
31	LG1-31	E0675-8	scaffold675	1401080|12280697	scaffold119	Jatr720	scaffold119	LG1-31	S675_Wu	LG1-31	S355
32	LG1-32	E0675-1	scaffold675	AG301	scaffold119	Jatr994	scaffold119	LG1-32	S2362_Wu	LG1-32	S4767
33	LG1-33	F5-290	scaffold264	G38	scaffold119	eSNP0886	scaffold119	LG1-33	S477_Wu	LG1-33	S653
34	LG1-34	E0123-1	scaffold123	1408015|12313680	scaffold542	Jcuint026	scaffold119	LG1-34	S469_Wu	LG1-34	S3539
35	LG1-35	E0675-7	scaffold675	1403306|12290609	scaffold542	SNP047-1	scaffold119	LG1-35	S465_Wu	LG1-35	E-ACTXM-CTG08
36	LG1-36	E0393-1	scaffold393	1400686|12361690	scaffold542	SNP047-3	scaffold119	LG1-36	S123_Wu	LG1-36	S2400
37	LG1-37	E0393-3	scaffold393	1402505|12340555	scaffold542	SNP047-4	scaffold119	LG1-37	S147_Wu	LG1-37	S15604
38	LG1-38	SNP0393-1	scaffold393	1408162|12317240	scaffold542	Jatr749	scaffold119	LG1-38	E-ACTXM-CAT02	LG1-38	S4864
39	LG1-39	E0393-5	scaffold393			SNP047-2	scaffold119	LG1-39	S108_Wu	LG1-39	S3463
40	LG1-40	SNP0139-2	scaffold139			Jatr722	scaffold542	LG1-40	E-ACTXM-CTG08	LG1-40	S9079
41	LG1-41	E0037-2	scaffold37			Jcuint009	scaffold119	LG1-41	W_Jcuint349	LG1-41	S9645
42	LG1-42	E0037-6	scaffold37			eSNP0845	scaffold542	LG1-42	E-ACTXM-CTA04	LG1-42	S1901
43	LG1-43	E0037-7	scaffold37			Jcuint091	scaffold542	LG1-43	S1969_Wu	LG1-43	S5116
44	LG1-44	E0037-1	scaffold37			Jatr805	scaffold542	LG1-44	S31_Wu	LG1-44	S7574
45	LG1-45	E0037-4	scaffold37					LG1-45	S419_Wu	LG1-45	S28289
46	LG1-46	E0031-1	scaffold31					LG1-46	S359_Wu	LG1-46	S8512
47	LG1-47	SNP0139-3	scaffold139					LG1-47	E-ACAXM-CTA11	LG1-47	S4373
48	LG1-48	E0659-3	scaffold659					LG1-48	S119_Wu	LG1-48	S2601
49	LG1-49	X1-6	scaffold287					LG1-49	S542_Wu	LG1-49	S5539
50	LG1-50	SNP0139-4	scaffold139					LG1-50	E-AACXM-CAT06	LG1-50	S7272
51	LG1-51	SNP0846-1	scaffold846							LG1-51	S2000
52	LG1-52	SNP0202-2	scaffold202							LG1-52	S626
53	LG1-53	E0009-1	scaffold9							LG1-53	S2223
54	LG1-54	E0355-2	scaffold355							LG1-54	S1369
55	LG1-55	SNP0857	scaffold857							LG1-55	S5110
56	LG1-56	E0478-1	scaffold478							LG1-56	S6317
57	LG1-57	E0903-1	scaffold903							LG1-57	S17662
58	LG1-58	E0494-1	scaffold494							LG1-58	S3568
59	LG1-59	E0114-1	scaffold114							LG1-59	S16227
60	LG1-60	E0497-1	scaffold497							LG1-60	S9076
61	LG1-61	E0521-1	scaffold521							LG1-61	S6953
62	LG1-62	E0163-1	scaffold163							LG1-62	S9474
63	LG1-63	E0332-1	scaffold332							LG1-63	S3205
64	LG1-64	E0596-1	scaffold596							LG1-64	S2503
65	LG1-65	E0139-1	scaffold139							LG1-65	S15811
66	LG1-66	E0064-1	scaffold64							LG1-66	S6968
67	LG1-67	E0992	scaffold992							LG1-67	S10783
68	LG1-68	E0347-1	scaffold347							LG1-68	W_Jcuint220
69	LG1-69	E0347-2	scaffold347							LG1-69	S46
70	LG1-70	E0114-2	scaffold114							LG1-70	S2381
71	LG1-71	E0903-3	scaffold903							LG1-71	S1960
72	LG1-72	E1594	scaffold1594							LG1-72	S3740
73	LG1-73	E0954-2	scaffold954							LG1-73	S1428
74	LG1-74	X1-4	scaffold57							LG1-74	S3937
75	LG1-75	SNP0857-1	scaffold857							LG1-75	S2871
76	LG1-76	E0355-1	scaffold355							LG1-76	S17314
77	LG1-77	E0605-2	scaffold605							LG1-77	S16912
78	LG1-78	SNP0202-3	scaffold202							LG1-78	S1492
79	LG1-79	E0093-3	scaffold93							LG1-79	S9901
80	LG1-80	E0362-1	scaffold362							LG1-80	S2122
81	LG1-81	SNP0268-2	scaffold268							LG1-81	S27081
82	LG1-82	E0747	scaffold747							LG1-82	S3251
83	LG1-83	E0681-1r	scaffold681							LG1-83	S3846
84	LG1-84	E0465-1	scaffold465							LG1-84	S6592
85	LG1-85	SNP0206-2	scaffold206							LG1-85	S2836
86	LG1-86	E0465-7	scaffold465							LG1-86	S1268
87	LG1-87	SNP0206-3	scaffold206							LG1-87	S1964
88	LG1-88	E0465-5	scaffold465							LG1-88	S12916
89	LG1-89	E0469-1	scaffold469							LG1-89	S11075
90	LG1-90	E0469-3	scaffold469							LG1-90	S7544
91	LG1-91	E0116-6	scaffold116							LG1-91	S1008
92	LG1-92	E0465-6	scaffold465							LG1-92	S4275
93	LG1-93	E0465-2	scaffold465							LG1-93	S3841
94	LG1-94	E0116-7	scaffold116							LG1-94	S7450
95	LG1-95	E0116-10	scaffold116							LG1-95	S4985
96	LG1-96	E0116-1	scaffold116							LG1-96	S2547
97	LG1-97	E0116-11	scaffold116							LG1-97	S11223
98	LG1-98	E0055-2	scaffold55							LG1-98	S6385
99	LG1-99	E0055-7	scaffold55							LG1-99	S2202
100	LG1-100	E0055-9	scaffold55							LG1-100	S5050
101	LG1-101	E0055-5	scaffold55							LG1-101	S7663
102	LG1-102	E0055-1	scaffold55							LG1-102	S3921
103	LG1-103	E0055-8	scaffold55							LG1-103	S4971
104	LG1-104	F1-34	scaffold55							LG1-104	S7480
										LG1-105	S5717
										LG1-106	S1553
										LG1-107	S4496
										LG1-108	S2410
										LG1-109	S4288
										LG1-110	S1604
										LG1-111	S1060
										LG1-112	S5779
										LG1-113	S3018
										LG1-114	S7502
										LG1-115	S2499
										LG1-116	S6640
										LG1-117	E-ACTXM-CTA03a
										LG1-118	E-ACTXM-CAT02
										LG1-119	S3361
										LG1-120	S8129
										LG1-121	S15134
										LG1-122	S990
										LG1-123	S7805
										LG1-124	S1794
										LG1-125	S3707
										LG1-126	S780
										LG1-127	S4523
										LG1-128	S4114
										LG1-129	S1217
										LG1-130	S4636
										LG1-131	S619
										LG1-132	S5418
										LG1-133	S21287
										LG1-134	S1991
										LG1-135	S516
										LG1-136	S1622
										LG1-137	S18314
										LG1-138	S547
										LG1-139	S6415
										LG1-140	S4041
										LG1-141	S3148
										LG1-142	S1944
										LG1-143	S344
										LG1-144	S1081
										LG1-145	S3573
										LG1-146	S1741
										LG1-147	S352
										LG1-148	S2326
										LG1-149	S16636
										LG1-150	S40
										LG1-151	S45
										LG1-152	S1740
										LG1-153	S1644
										LG1-154	S102
										LG1-155	S1189
										LG1-156	S4974
										LG1-157	W_Jcuint349
										LG1-158	S2887
										LG1-159	S736
										LG1-160	S15738
										LG1-161	S12802
										LG1-162	S328
										LG1-163	S583
										LG1-164	S5872
										LG1-165	S615
										LG1-166	S2789
										LG1-167	S594
										LG1-168	S699
										LG1-169	S2924
										LG1-170	S388
										LG1-171	S1452
										LG1-172	S7817
										LG1-173	S935
										LG1-174	S2030
										LG1-175	S1617
										LG1-176	S476
										LG1-177	S410
										LG1-178	S17116
										LG1-179	S10158
										LG1-180	S7791
										LG1-181	S4746
										LG1-182	S4670
										LG1-183	S8266
										LG1-184	S651
										LG1-185	S340
										LG1-186	S2869
										LG1-187	S256
										LG1-188	S3140
										LG1-189	S3311
										LG1-190	S14369
										LG1-191	S1018
										LG1-192	S1398
										LG1-193	S2853
										LG1-194	S4540
										LG1-195	S1959
										LG1-196	S1716
										LG1-197	S17253
										LG1-198	S279
										LG1-199	S909
										LG1-200	S14117
										LG1-201	S42
										LG1-202	S3610
										LG1-203	S3511
										LG1-204	S2256
										LG1-205	S545
										LG1-206	S294
										LG1-207	S724
										LG1-208	S7494
										LG1-209	S2359
										LG1-210	S288
										LG1-211	S3764
										LG1-212	S672
										LG1-213	S230
										LG1-214	S33
										LG1-215	S610
										LG1-216	S1816
										LG1-217	S1724
										LG1-218	S2874
										LG1-219	S563
										LG1-220	S7
										LG1-221	S7386
										LG1-222	S2777
										LG1-223	S226
										LG1-224	S374
										LG1-225	S11667
										LG1-226	S1156
										LG1-227	S2245
										LG1-228	S106
										LG1-229	S11063
										LG1-230	S15398
										LG1-231	S2947
										LG1-232	S616
										LG1-233	S1067
										LG1-234	S2864
										LG1-235	S2910
										LG1-236	S1666
										LG1-237	S1503
										LG1-238	S11446
										LG1-239	S3730
										LG1-240	S2568
										LG1-241	S112
										LG1-242	S982
										LG1-243	S572
										LG1-244	S715
										LG1-245	S5252
										LG1-246	S10330
										LG1-247	E-AACXM-CAT06
	Linkage Group	Marker	The anchored scaffold	Marker	The anchored scaffold	Marker	The anchored scaffold	Linkage Group	Marker	Linkage Group	Marker
105	LG2-1	E0079-6	scaffold79	1403756|12343728	scaffold84	eSNP0262	scaffold84	LG2-1	S84_Wu	LG2-1	E-AACXM-CAG04
106	LG2-2	E0079-10	scaffold79	SNP4293	scaffold84	Jatr333	scaffold84	LG2-2	E-AACXM-CAT07	LG2-2	S2727
107	LG2-3	E0079-1	scaffold79	1400860|12363196	scaffold84	eSNP0078	scaffold84	LG2-3	S1565_Wu	LG2-3	S6232
108	LG2-4	E0079-13	scaffold79	1399700|12305059	scaffold84	eSNP0887	scaffold84	LG2-4	E-AACXM-CAG06	LG2-4	S4027
109	LG2-5	E0079-12	scaffold79	1409792|12326085	scaffold84	eSNP0226	scaffold191	LG2-5	E-ACAXM-CAT09	LG2-5	E-AAGXM-CAT14
110	LG2-6	E0079-11	scaffold79	1404346|12357882	scaffold84	eSNP0206	scaffold84	LG2-6	S191_Wu	LG2-6	S11746
111	LG2-7	E0079-16	scaffold79	1409855|12325208	scaffold84	eSNP0218	scaffold84	LG2-7	E-AAXM-CTG05	LG2-7	S8418
112	LG2-8	E0079-7	scaffold79	1417235|12279465	scaffold84	Jatr691	scaffold84	LG2-8	S956_Wu	LG2-8	S1420
113	LG2-9	E0067-8	scaffold67	SNP10074	scaffold191	eSNP0257	scaffold84	LG2-9	S395_Wu	LG2-9	S987
114	LG2-10	E0067-7	scaffold67	SNP1209	scaffold191	eSNP0280	scaffold191	LG2-10	S762_Wu	LG2-10	S4046
115	LG2-11	E0079-8	scaffold79	SNP4033	caffold191	SNP019-1	scaffold96	LG2-11	E-ACTXM-CTG07	LG2-11	S481
116	LG2-12	E0067-11	scaffold67	SNP14419	scaffold96	SNP019-2	scaffold96	LG2-12	S404_Wu	LG2-12	S5510
117	LG2-13	E0067-3	scaffold67	SNP2145	scaffold96	SNP019-3	scaffold96	LG2-13	S930_Wu	LG2-13	S12878
118	LG2-14	E0067-1	scaffold67	SNP17521	scaffold96	Jcuint105	scaffold96	LG2-14	S547_Wu	LG2-14	S363
119	LG2-15	E0067-5	scaffold67	SNP11175	scaffold595	Jcuint143	scaffold595	LG2-15	S18_Wu	LG2-15	S210
120	LG2-16	X2-14	scaffold18	Jcuint143	scaffold595	Jatr1035	scaffold361	LG2-16	S304_Wu	LG2-16	S1527
121	LG2-17	F1-57	scaffold18	G69	scaffold712	Jatr979	scaffold647	LG2-17	S324_Wu	LG2-17	S1897
122	LG2-18	F1-81	scaffold18	SNP8125	scaffold151	eSNP0116	scaffold18	LG2-18	S44_Wu	LG2-18	S975
123	LG2-19	X2-13	scaffold18	1405755|12328554	scaffold540	curcin1	scaffold44	LG2-19	S376_Wu	LG2-19	S12123
124	LG2-20	X2-7	scaffold304	1400348|12287974	scaffold361	curcin2	scaffold44	LG2-20	S217_Wu	LG2-20	S3883
125	LG2-21	E304-3	scaffold304	G9	scaffold129	Jatr681	scaffold304	LG2-21	S421_Wu	LG2-21	S2077
126	LG2-22	X2-9	scaffold304	1406782|12348217	scaffold129	Jatr124	scaffold376	LG2-22	S155_Wu	LG2-22	S9892
127	LG2-23	E304-1	scaffold304	1405488|12354264	scaffold129	Jcuint047	scaffold304	LG2-23	S1936_Wu	LG2-23	S3252
128	LG2-24	SNP117-2	scaffold117	1409076|12266896	scaffold129	Jcuint250	scaffold304	LG2-24	S595_Wu	LG2-24	S3942
129	LG2-25	E0324-3	scaffold324	1405734|12335465	scaffold81	Jcuint320	scaffold304	LG2-25	S386_Wu	LG2-25	S1009
130	LG2-26	E0217-1	scaffold217	SNP993	scaffold187	eSNP0088	scaffold18	LG2-26	S138_Wu	LG2-26	S3346
131	LG2-27	E0324-1	scaffold324	AG220	scaffold12	Jatr964	scaffold18	LG2-27	S12_Wu	LG2-27	S396
132	LG2-28	E0324-5	scaffold324	AG516	scaffold12	eSNP0089	scaffold18	LG2-28	S406_Wu	LG2-28	S3933
133	LG2-29	E0324-4	scaffold324	JCT17	scaffold647	Jatr804	scaffold18	LG2-29	S471_Wu	LG2-29	S10236
134	LG2-30	F2-47	scaffold18	JCT13	scaffold217	eSNP0082	scaffold18	LG2-30	S302_Wu	LG2-30	S10853
135	LG2-31	E304-2	scaffold304	NT1	scaffold44	eSNP0099	scaffold18	LG2-31	S712_Wu	LG2-31	S10074
136	LG2-32	E0421-1	scaffold421	JCT92	scaffold18	eSNP0286	scaffold18	LG2-32	S647_Wu	LG2-32	S8613
137	LG2-33	E0647-2	scaffold647	1414158|12301961	scaffold18	eSNP0871	scaffold18	LG2-33	S129_Wu	LG2-33	S2392
138	LG2-34	E0819	scaffold819	1399178|12321534	scaffold79	eSNP0872	scaffold18	LG2-34	S1376_Wu	LG2-34	S3237
139	LG2-35	E0956-2	scaffold956			eSNP0169	scaffold18	LG2-35	S1_Wu	LG2-35	S4534
140	LG2-36	SNP0814-1	scaffold814			Jcuint359	scaffold18	LG2-36	S814_Wu	LG2-36	S3053
141	LG2-37	SNP0814-2	scaffold814			Jatr114	scaffold67	LG2-37	S354_Wu	LG2-37	S815
142	LG2-38	SNP0354-2	scaffold354			eSNP0056	scaffold79	LG2-38	S540_Wu	LG2-38	S2839
143	LG2-39	E0155-1	scaffold155			eSNP0888	scaffold79	LG2-39	S96_Wu	LG2-39	S3324
144	LG2-40	E0346-2	scaffold346			eSNP0081	scaffold79	LG2-40	S246_Wu	LG2-40	S5716
145	LG2-41	E0346-3	scaffold346			SNP005-1	scaffold129	LG2-41	E-AACXM-CAG04	LG2-41	S3838
146	LG2-42	E0346-1	scaffold346			SNP005-2	scaffold129	LG2-42	S479_Wu	LG2-42	S1819
147	LG2-43	X2-8	scaffold376			SNP005-3	scaffold129	LG2-43	S531_Wu	LG2-43	S1781
148	LG2-44	F4-22	scaffold346			SNP005-4	scaffold129	LG2-44	S520_Wu	LG2-44	S2580
149	LG2-45	E0386-1	scaffold386					LG2-45	S262_Wu	LG2-45	S3535
150	LG2-46	E0081-3	scaffold81					LG2-46	S236_Wu	LG2-46	S3681
151	LG2-47	E0012-6	scaffold12					LG2-47	E-ACAXM-CTA09	LG2-47	S3968
152	LG2-48	E0012-5	scaffold12					LG2-48	S67_Wu	LG2-48	S1314
153	LG2-49	E0012-4	scaffold12					LG2-49	E-AACXM-CAT10	LG2-49	S147
154	LG2-50	E0956-1	scaffold956					LG2-50	S79_Wu	LG2-50	S4536
155	LG2-51	E0138-1	scaffold138					LG2-51	E-AACXM-CAG08	LG2-51	S6717
156	LG2-52	SNP0893-1	scaffold893					LG2-52	E-AAGXM-CAT14	LG2-52	S14270
157	LG2-53	E0236-1	scaffold236					LG2-53	S183_Wu	LG2-53	S11921
158	LG2-54	E0406-1	scaffold406							LG2-54	S1417
159	LG2-55	E0302-3	scaffold302							LG2-55	S646
160	LG2-56	E0547-1	scaffold547							LG2-56	S6586
161	LG2-57	E0762-2	scaffold762							LG2-57	S14128
162	LG2-58	E0422-1	scaffold422							LG2-58	S1419
163	LG2-59	SNP1067-1	scaffold1067							LG2-59	S3395
164	LG2-60	E0054-1	scaffold54							LG2-60	S4136
165	LG2-61	E0187-5	scaffold187							LG2-61	S4507
166	LG2-62	E0187-7	scaffold187							LG2-62	S4892
167	LG2-63	E0187-4	scaffold187							LG2-63	S492
168	LG2-64	E0187-6	scaffold187							LG2-64	S4973
169	LG2-65	E0081-1	scaffold81							LG2-65	S6841
170	LG2-66	E0081-2	scaffold81							LG2-66	S7738
171	LG2-67	E0531-1	scaffold531							LG2-67	S8440
172	LG2-68	E0129-6	scaffold129							LG2-68	S1393
173	LG2-69	E0129-3	scaffold129							LG2-69	S8387
174	LG2-70	E0129-1	scaffold129							LG2-70	S386
175	LG2-71	E0129-2	scaffold129							LG2-71	S2816
176	LG2-72	SNP0216-2	scaffold216							LG2-72	S4311
177	LG2-73	E0246-1	scaffold246							LG2-73	S8427
178	LG2-74	E0871-2	scaffold871							LG2-74	S4419
179	LG2-75	E0871-1	scaffold871							LG2-75	S1447
180	LG2-76	SNP0001-3	scaffold1							LG2-76	S19790
181	LG2-77	E0674-1	scaffold674							LG2-77	S4442
182	LG2-78	SNP0001-2	scaffold1							LG2-78	S5015
183	LG2-79	E0001-2	scaffold1							LG2-79	S962
184	LG2-80	E0712-1	scaffold712							LG2-80	S1514
185	LG2-81	E0712-2	scaffold712							LG2-81	S4938
186	LG2-82	X2-5	scaffold361							LG2-82	S2008
187	LG2-83	F4-7	scaffold540							LG2-83	S16231
188	LG2-84	E0540-4	scaffold540							LG2-84	S5811
189	LG2-85	E0540-3	scaffold540							LG2-85	S5272
190	LG2-86	E1936-1	scaffold1936							LG2-86	S7201
191	LG2-87	E1936-2	scaffold1936							LG2-87	S1735
192	LG2-88	X2-4	scaffold595							LG2-88	S1279
193	LG2-89	E0096-2	scaffold96							LG2-89	S3591
194	LG2-90	E0096-17	scaffold96							LG2-90	S2420
195	LG2-91	E0096-14	scaffold96							LG2-91	S261
196	LG2-92	E0096-18	scaffold96							LG2-92	S14977
197	LG2-93	E0096-1	scaffold96							LG2-93	S4332
198	LG2-94	E0096-5	scaffold96							LG2-94	S1628
199	LG2-95	E0096-7	scaffold96							LG2-95	S15149
200	LG2-96	F5-190	scaffold96							LG2-96	S2850
201	LG2-97	F1-91	scaffold96							LG2-97	S349
202	LG2-98	E0096-8	scaffold96							LG2-98	S2501
203	LG2-99	F1-65	scaffold96							LG2-99	S2473
204	LG2-100	E0096-12	scaffold96							LG2-100	S2134
205	LG2-101	E0191-7	scaffold191							LG2-101	S13255
206	LG2-102	E0191-18	scaffold191							LG2-102	S6672
207	LG2-103	E0191-4	scaffold191							LG2-103	S2830
208	LG2-104	E0191-15	scaffold191							LG2-104	S3616
209	LG2-105	F5-282	scaffold191							LG2-105	S2642
210	LG2-106	E0084-5	scaffold84							LG2-106	S5188
211	LG2-107	E0084-18	scaffold84							LG2-107	S2216
212	LG2-108	E0084-11	scaffold84							LG2-108	S804
213	LG2-109	E0084-3	scaffold84							LG2-109	S20580
214	LG2-110	F5-188	scaffold84							LG2-110	S61
215	LG2-111	E0084-7	scaffold84							LG2-111	S1646
216	LG2-112	E0084-16	scaffold84							LG2-112	S3876
217	LG2-113	F5-177	scaffold84							LG2-113	S628
218	LG2-114	F5-294	scaffold84
219	LG2-115	F1-106	scaffold84 (3557298)
220	LG2-116	E0084-4	scaffold84
	Linkage Group	Marker	The anchored scaffold	Marker	The anchored scaffold	Marker	The anchored scaffold	Linkage Group	Marker	Linkage Group	Marker
221	LG3-1	X3-4	scaffold200	1412268|12285283	scaffold200	eSNP0271	scaffold200	LG3-1	S684_Wu	LG3-1	S2753
222	LG3-2	E0436-2	scaffold436	1403801|12354320	scaffold200	SNP032-1	scaffold34	LG3-2	E-AACXM-CTA02	LG3-2	S6363
223	LG3-3	E0436-1	scaffold436	1407310|12325670	scaffold122	SNP032-2	scaffold34	LG3-3	E-AACXM-CTA12	LG3-3	S7215
224	LG3-4	E0436-3	scaffold436	1408895|12330642	scaffold122	eSNP0101	scaffold555	LG3-4	S160_Wu	LG3-4	S5821
225	LG3-5	E0579-4	scaffold579	1401225|12362534	scaffold122	eSNP0861	scaffold338	LG3-5	E-AACXM-CTA06	LG3-5	E-AAGXM-CAT03
226	LG3-6	E0579-2	scaffold579	1405383|12349423	scaffold300	eSNP0898	scaffold496	LG3-6	S552_Wu	LG3-6	S4577
227	LG3-7	E0579-1	scaffold579	SNP14400	scaffold300	Jcuint003	scaffold562	LG3-7	S484_Wu	LG3-7	S3351
228	LG3-8	E0579-3	scaffold579	AG948	scaffold300	Jcuint048	scaffold50	LG3-8	S252_Wu	LG3-8	S14095
229	LG3-9	E0300-2	scaffold300	1400200|12292933	scaffold490	Jcuint179	scaffold33	LG3-9	S385_Wu	LG3-9	S3890
230	LG3-10	E0300-4	scaffold300	1403430|12359372	scaffold384	eSNP0870	scaffold579	LG3-10	S384_Wu	LG3-10	S3950
231	LG3-11	E0300-3	scaffold300	G87	scaffold555	Jatr1048	scaffold200	LG3-11	S456_Wu	LG3-11	S1645
232	LG3-12	E0490-2	scaffold490	1404357|12352815	scaffold560	eSNP0283	scaffold27	LG3-12	S581_Wu	LG3-12	S1411
233	LG3-13	E0736	scaffold736	1403531|12359155	scaffold456	Jcuint025	scaffold26	LG3-13	S26_Wu	LG3-13	S4030
234	LG3-14	SNP0378-1	scaffold378	1410519|12295018	scaffold462	OLE-II-1	scaffold27	LG3-14	S50_Wu	LG3-14	S5759
235	LG3-15	E0345-6	scaffold345	G92	scaffold456	OLE-II-2	scaffold27	LG3-15	S1137_Wu	LG3-15	S6837
236	LG3-16	E0034-2	scaffold34	AG17	scaffold456	OLE-II-3	scaffold27	LG3-16	S102_Wu	LG3-16	S7471
237	LG3-17	E0446-1	scaffold446	1418135|12269998	scaffold271	OLE-II-4	scaffold27	LG3-17	S34_Wu	LG3-17	S5921
238	LG3-18	E0034-3	scaffold34	1409444|12329484	scaffold33	OLE-II-5	scaffold27	LG3-18	S1122_Wu	LG3-18	S5873
239	LG3-19	E0581-2	scaffold581	1409852|12325206	scaffold33	OLE-II-6	scaffold27	LG3-19	S290_Wu	LG3-19	S2507
240	LG3-20	E0562-1	scaffold562	1399166|12322072	scaffold33	OLE-II-7	scaffold27	LG3-20	S300_Wu	LG3-20	S3945
241	LG3-21	E0545-1	scaffold545	AG940	scaffold33	eSNP0272	scaffold27	LG3-21	S338_Wu	LG3-21	S1552
242	LG3-22	E0345-3	scaffold345	G93	scaffold26	Jcuint038	scaffold27	LG3-22	S168_Wu	LG3-22	S15755
243	LG3-23	SNP0633	scaffold633	SNP18956	scaffold26	Jatr901	scaffold27	LG3-23	S490_Wu	LG3-23	S1161
244	LG3-24	E0811	scaffold811	1411956|12287167	scaffold26	Jcuint064	scaffold27	LG3-24	S579_Wu	LG3-24	S2085
245	LG3-25	E0456-1	scaffold456	1405724|12340301	scaffold26	Jcuint221	scaffold27	LG3-25	S200_Wu	LG3-25	S2573
246	LG3-26	E0026-9	scaffold26	1406203|12280493	scaffold26	eSNP0017	scaffold160	LG3-26	S718_Wu	LG3-26	S2011
247	LG3-27	E0535-1	scaffold535	1415931|12287592	scaffold26	eSNP0061	scaffold160	LG3-27	S148_Wu	LG3-27	S10696
248	LG3-28	E0034-1	scaffold34	EST09	scaffold26	Jatr117	scaffold160	LG3-28	S496_Wu	LG3-28	S983
249	LG3-29	E0290-2	scaffold290	1416878|12275385	scaffold26	Jatr358	scaffold160	LG3-29	E-AAGXM-CAT01	LG3-29	S3380
250	LG3-30	E0490-1	scaffold490	SNP19021	scaffold26	Jatr755	scaffold160	LG3-30	E-ACAXM-CTA13	LG3-30	S11322
251	LG3-31	E0168-3	scaffold168	1401513|12347017	scaffold26	Jcuint163	scaffold160	LG3-31	S27_Wu	LG3-31	S5568
252	LG3-32	SNP0252-1	scaffold252	1404589|12350440	scaffold26	KSAI-1	scaffold160	LG3-32	E-AAGXM-CAT03	LG3-32	S2188
253	LG3-33	E0345-4	scaffold345	Jcuint025	scaffold26	KSAI-2	scaffold684	LG3-33	S925_Wu	LG3-33	S2740
254	LG3-34	E0345-5	scaffold345	G95	scaffold27	KSAI-3	scaffold684	LG3-34	E-AACXM-CAT09	LG3-34	S806
255	LG3-35	E0034-4	scaffold34	1403872|12354357	scaffold27	KSAI-4	scaffold684			LG3-35	S6670
256	LG3-36	E0490-4	scaffold490	G89	scaffold27	KSAI-5	scaffold684			LG3-36	S5402
257	LG3-37	E0148-1	scaffold148	AG503	scaffold27	eSNP0278	scaffold684			LG3-37	S2040
258	LG3-38	E0925-1	scaffold925	EST19	scaffold27	Jatr1054	scaffold684			LG3-38	S17242
259	LG3-39	E0345-7	scaffold345	1404111|12351865	scaffold27	eSNP0801	scaffold684			LG3-39	S1021
260	LG3-40	E0290-1	scaffold290	SNP315	scaffold27	Jcuint197	scaffold684			LG3-40	S14368
261	LG3-41	SNP0338-1	scaffold338	G40	scaffold27	eSNP0028	scaffold684			LG3-41	S1065
262	LG3-42	E0490-3	scaffold490	Jcuint038	scaffold27	eSNP0137	scaffold684			LG3-42	S15206
263	LG3-43	E0252-2	scaffold252	SNP18265	scaffold160	Jatr378	scaffold684			LG3-43	S1620
264	LG3-44	E0148-2	scaffold148	G90	scaffold160	Jatr856	scaffold684			LG3-44	S3956
265	LG3-45	E0718-1	scaffold718	Jatr358	scaffold160	Jatr971	scaffold684			LG3-45	S1948
266	LG3-46	E0033-6	scaffold33	1410420|12311163	scaffold160	eSNP0810	scaffold684			LG3-46	S5047
267	LG3-47	E0028-2	scaffold28	1397861|12355392	scaffold160	eSNP0176	scaffold684			LG3-47	S162
268	LG3-48	E0050-2	scaffold50	1409181|12312766	scaffold160	eSNP0204	scaffold684			LG3-48	S4885
269	LG3-49	E0033-13	scaffold33	SNP23226	scaffold160					LG3-49	S7673
270	LG3-50	E0496-1	scaffold496	1406975|12333341	scaffold684					LG3-50	S1563
271	LG3-51	E0033-1	scaffold33	G21	scaffold684					LG3-51	S15102
272	LG3-52	SNP1137-1	scaffold1137	G51	scaffold684					LG3-52	S17810
273	LG3-53	E0033-10	scaffold33	1411565|12289405	scaffold684					LG3-53	S3589
274	LG3-54	E0627	scaffold627	1409933|12322640	scaffold684					LG3-54	S4828
275	LG3-55	E0033-4	scaffold33	SNP2652	scaffold684					LG3-55	S4425
276	LG3-56	F4-45	scaffold33	1408815|12268198	scaffold684					LG3-56	S7391
277	LG3-57	E0496-3	scaffold496	AG937	scaffold684					LG3-57	S1558
278	LG3-58	E0271-1	scaffold271	EST14	scaffold684					LG3-58	S4492
279	LG3-59	E0033-7	scaffold33							LG3-59	S26196
280	LG3-60	E0033-14	scaffold33							LG3-60	S2718
281	LG3-61	E0033-9	scaffold33							LG3-61	S2302
282	LG3-62	E0050-3	scaffold50							LG3-62	S1497
283	LG3-63	E0026-10	scaffold26							LG3-63	S3405
284	LG3-64	E0026-7	scaffold26							LG3-64	S6566
285	LG3-65	E0026-15	scaffold26							LG3-65	S175
286	LG3-66	E0026-19	scaffold26							LG3-66	S552
287	LG3-67	E0026-13	scaffold26							LG3-67	S90
288	LG3-68	E0026-12	scaffold26							LG3-68	S2843
289	LG3-69	E0026-4	scaffold26							LG3-69	S618
290	LG3-70	E0026-14	scaffold26							LG3-70	S863
291	LG3-71	F5-164	scaffold26							LG3-71	S733
292	LG3-72	E0026-3	scaffold26							LG3-72	S198
293	LG3-73	E0027-3	scaffold27							LG3-73	S1203
294	LG3-74	E0026-2	scaffold26							LG3-74	S6476
295	LG3-75	E0026-18	scaffold26							LG3-75	S95
296	LG3-76	X3-5	scaffold26							LG3-76	S26585
297	LG3-77	F4-46	scaffold26							LG3-77	S586
298	LG3-78	E0026-16	scaffold26							LG3-78	S2364
299	LG3-79	E0027-7	scaffold27							LG3-79	S25290
300	LG3-80	E0027-8	scaffold27							LG3-80	S307
301	LG3-81	E0027-5	scaffold27							LG3-81	S216
302	LG3-82	E0027-4	scaffold27							LG3-82	S4946
303	LG3-83	E0027-1	scaffold27							LG3-83	S9210
304	LG3-84	E0027-16	scaffold27							LG3-84	S2520
305	LG3-85	E0027-15	scaffold27							LG3-85	S5552
306	LG3-86	E0027-14	scaffold27							LG3-86	S940
307	LG3-87	X3-6	scaffold27							LG3-87	S5450
308	LG3-88	E0160-11	scaffold160							LG3-88	S8524
309	LG3-89	X3-10	scaffold160							LG3-89	S8414
310	LG3-90	E0160-10	scaffold160							LG3-90	S1392
311	LG3-91	X3-11	scaffold160							LG3-91	S2214
312	LG3-92	X3-12	scaffold160							LG3-92	S920
313	LG3-93	X3-14	scaffold684							LG3-93	S5084
314	LG3-94	F3-2	scaffold160							LG3-94	S1659
315	LG3-95	F5-220	scaffold684							LG3-95	S64
316	LG3-96	F5-87	scaffold684							LG3-96	S737
317	LG3-97	X3-16	scaffold684							LG3-97	E-AACXM-CTA12
318	LG3-98	X3-17	scaffold684							LG3-98	S225
319	LG3-99	E0684-r1	scaffold684r1							LG3-99	S197
320	LG3-100	F2-50	scaffold684							LG3-100	S250
321	LG3-101	X3-18	scaffold684							LG3-101	S18804
										LG3-102	S1295
										LG3-103	S2351
										LG3-104	S7389
										LG3-105	S1400
										LG3-106	S6379
										LG3-107	S504
										LG3-108	S7296
										LG3-109	S467
										LG3-110	S474
										LG3-111	S706
										LG3-112	S1195
										LG3-113	S3325
										LG3-114	S2691
										LG3-115	S291
										LG3-116	S2942
										LG3-117	S105
										LG3-118	S1112
										LG3-119	S4463
										LG3-120	S10365
										LG3-121	S4907
										LG3-122	S63
										LG3-123	S5144
										LG3-124	S21278
										LG3-125	S5976
										LG3-126	S295
										LG3-127	S2042
										LG3-128	S892
										LG3-129	S7297
										LG3-130	S7298
										LG3-131	E-AACXM-CAG01
	Linkage Group	Marker	The anchored scaffold	Marker	The anchored scaffold	Marker	The anchored scaffold	Linkage Group	Marker	Linkage Group	Marker
322	LG4-1	E0312-1	scaffold312	1414845|12303360	scaffold611	Jcuint301	scaffold5	LG4-1	S221_Wu	LG4-1	S2418
323	LG4-2	E0320-3	scaffold320	1400392|12287071	scaffold611	eSNP0193	scaffold5	LG4-2	S159_Wu	LG4-2	S1779
324	LG4-3	E0320-4	scaffold320	1410160|12299536	scaffold611	eSNP0188	scaffold339	LG4-3	E-AACXM-CAT05	LG4-3	S22614
325	LG4-4	E0941-2	scaffold941	1414580|12305335	scaffold611	Jcuint128	scaffold339	LG4-4	S46_Wu	LG4-4	S2
326	LG4-5	E0941-1	scaffold941	1414899|12292246	scaffold611	eSNP0247	scaffold255	LG4-5	E-ACAXM-CAT08	LG4-5	S387
327	LG4-6	E0025-2	scaffold25	1401780|12276122	scaffold611	eSNP0030	scaffold420	LG4-6	S907_Wu	LG4-6	S1416
328	LG4-7	E0656-4	scaffold656	1406671|12326248	scaffold611	eSNP0179	scaffold611	LG4-7	S2654_Wu	LG4-7	S712
329	LG4-8	E0401-1	scaffold401	1413516|12311771	scaffold611	eSNP0811	scaffold5	LG4-8	S339_Wu	LG4-8	S6
330	LG4-9	E0705-2	scaffold705	1407326|12327601	scaffold5	eSNP0822	scaffold5	LG4-9	S941_Wu	LG4-9	S784
331	LG4-10	F5-279	scaffold120	1417274|12274745	scaffold5	Jcuint034	scaffold5	LG4-10	S585_Wu	LG4-10	S182
332	LG4-11	F5-238	scaffold307	1408943|12267576	scaffold5	Jatr704	scaffold5	LG4-11	S639_Wu	LG4-11	S5936
333	LG4-12	E0705-1	scaffold705	1410507|12295500	scaffold5	Jatr322	scaffold5	LG4-12	S320_Wu	LG4-12	S13938
334	LG4-13	E0307-1	scaffold307	1399245|12316251	scaffold5	Jatr923	scaffold498	LG4-13	S269_Wu	LG4-13	S1710
335	LG4-14	E0401-3	scaffold401	1408147|12335690	scaffold5	Jatr972	scaffold89	LG4-14	S358_Wu	LG4-14	S8433
336	LG4-15	F1-10	scaffold2645	1408803|12338145	scaffold5	Jcuint090	scaffold269	LG4-15	S1173_Wu	LG4-15	S4925
337	LG4-16	E0611-2	scaffold611	G37	scaffold5	Jcuint115	scaffold401	LG4-16	S307_Wu	LG4-16	S30
338	LG4-17	E0611-3	scaffold611	1411735|12281052	scaffold5	eSNP0933	scaffold339	LG4-17	S15_Wu	LG4-17	S9122
339	LG4-18	E0611-4	scaffold611	G108	scaffold5	eSNP0152	scaffold339	LG4-18	S711_Wu	LG4-18	S146
340	LG4-19	X4-1	scaffold5	1402422|12344861	scaffold5	Jcuint274	scaffold339	LG4-19	S1168_Wu	LG4-19	S13638
341	LG4-20	E0120-1	scaffold120	1416680|12276533	scaffold5	AP2BP-1	scaffold2654	LG4-20	S312_Wu	LG4-20	S1236
342	LG4-21	E0120-2	scaffold120	1401379|12362464	scaffold5	AP2BP-2	scaffold2654	LG4-21	S86_Wu	LG4-21	S674
343	LG4-22	E0401-5	scaffold401	1407681|12314512	scaffold705	ACC-2	scaffold339	LG4-22	S310_Wu	LG4-22	S1288
344	LG4-23	X4-9	scaffold401	1410021|12318110	scaffold401	ACC-3	scaffold339	LG4-23	S120_Wu	LG4-23	S4262
345	LG4-24	E0401-2	scaffold401	1410311|12297713	scaffold656	ACC-4	scaffold339	LG4-24	S89_Wu	LG4-24	S2861
346	LG4-25	E0401-4	scaffold401	G25_locus1	scaffold1168	ACC-5	scaffold339	LG4-25	S498_Wu	LG4-25	S1061
347	LG4-26	E0656-1	scaffold656	1404608|12343534	scaffold337	ACC-1	scaffold339	LG4-26	S705_Wu	LG4-26	S67
348	LG4-27	E0656-2	scaffold656	Jcuint090	scaffold269	eSNP0157	scaffold46	LG4-27	S401_Wu	LG4-27	S9910
349	LG4-28	E0036-1	scaffold36	JCT47	scaffold573	Jatr682	scaffold46	LG4-28	S5_Wu	LG4-28	SJCR4U29009
350	LG4-29	E0358-1	scaffold358	G116	scaffold339	Jatr872	scaffold46	LG4-29	S1514_Wu	LG4-29	S359
351	LG4-30	E0179-1	scaffold179	G46	scaffold339	Jatr795	scaffold159	LG4-30	S611_Wu	LG4-30	S459
352	LG4-31	E0015-1	scaffold15	JCT51	scaffold339	Jcuint298	scaffold159	LG4-31	E-ACAXM-CAT04	LG4-31	S6073
353	LG4-32	E0476-1	scaffold476	G27	scaffold339	Jatr854	scaffold159	LG4-32	E-ACTXM-CAT06	LG4-32	S1846
354	LG4-33	X4-8	scaffold269	1399779|12313258	scaffold46	Jatr970	scaffold221	LG4-33	E-ACAXM-CTG01	LG4-33	S223
355	LG4-34	E0089-4	scaffold89	AG806	scaffold46	Jcuint074	scaffold221			LG4-34	S11776
356	LG4-35	SNP0573-2	scaffold573	1408632|12316716	scaffold46	Jatr345	scaffold221			LG4-35	S2291
357	LG4-36	SNP0193-2	scaffold193	JCT59	scaffold46	Jatr949	scaffold221			LG4-36	S1237
358	LG4-37	SNP0052-1	scaffold52	AG143	scaffold46	Jcuint028	scaffold221			LG4-37	S283
359	LG4-38	E0089-5	scaffold89	1406120|12346418	scaffold159	Jcuint086	scaffold221			LG4-38	S3220
360	LG4-39	E1173	scaffold1173	SNP9376	scaffold159	Jatr600	scaffold221			LG4-39	S5052
361	LG4-40	E1168	scaffold1168	1409484|12332255	scaffold159	eSNP0086	scaffold339			LG4-40	S103
362	LG4-41	E0248-2	scaffold248	AG224	scaffold159					LG4-41	S4999
363	LG4-42	E0639	scaffold639	G183	scaffold221					LG4-42	S2089
364	LG4-43	E0310-1a	scaffold310	1406452|12345411	scaffold221					LG4-43	S6094
365	LG4-44	E0089-2	scaffold89	SNP17812	scaffold221					LG4-44	S6671
366	LG4-45	E0089-1	scaffold89	1407225|12343970	scaffold221					LG4-45	S852
367	LG4-46	X4-6	scaffold498							LG4-46	S4009
368	LG4-47	SNP0573-1	scaffold573							LG4-47	S3002
369	LG4-48	E0337-1	scaffold337							LG4-48	S8384
370	LG4-49	E0711-2	scaffold711							LG4-49	S512
371	LG4-50	E0711-3	scaffold711							LG4-50	S3624
372	LG4-51	E0711-4	scaffold711							LG4-51	S6487
373	LG4-52	E0224-2	scaffold224							LG4-52	S2388
374	LG4-53	E0224-1	scaffold224							LG4-53	S2682
375	LG4-54	F5-281	scaffold224							LG4-54	S2737
376	LG4-55	E420-3	scaffold420							LG4-55	S3603
377	LG4-56	E420-1	scaffold420							LG4-56	S5807
378	LG4-57	E420-4	scaffold420							LG4-57	S1250
379	LG4-58	X4-2	scaffold339							LG4-58	S2366
380	LG4-59	F4-94	scaffold339							LG4-59	S4953
381	LG4-60	F5-246	scaffold339							LG4-60	S7303
382	LG4-61	F5-53	scaffold339							LG4-61	S3221
383	LG4-62	F4-31	scaffold46							LG4-62	S939
384	LG4-63	E2654-3	scaffold2654							LG4-63	S7370
385	LG4-64	E2654-2	scaffold2654							LG4-64	S104
386	LG4-65	E2654-1	scaffold2654							LG4-65	S1225
387	LG4-66	E0046-14	scaffold46							LG4-66	S12374
388	LG4-67	E0046-18	scaffold46							LG4-67	S8682
389	LG4-68	E0046-12	scaffold46							LG4-68	S12891
390	LG4-69	E0046-16	scaffold46							LG4-69	S2859
391	LG4-70	E0046-29	scaffold46							LG4-70	S3851
392	LG4-71	E0046-21	scaffold46							LG4-71	S4541
393	LG4-72	F4-68	scaffold46							LG4-72	S1806
394	LG4-73	E0046-26	scaffold46							LG4-73	S9516
395	LG4-74	E0046-27	scaffold46							LG4-74	S11957
396	LG4-75	E0046-13	scaffold46							LG4-75	S8867
397	LG4-76	E0046-9	scaffold46							LG4-76	S1147
398	LG4-77	E0046-28	scaffold46							LG4-77	S1399
399	LG4-78	E0046-2	scaffold46							LG4-78	S1608
400	LG4-79	F5-236	scaffold159							LG4-79	S2617
401	LG4-80	E0159-1	scaffold159							LG4-80	S2006
402	LG4-81	F5-229	scaffold221							LG4-81	S4287
										LG4-82	S13399
										LG4-83	S1270
										LG4-84	S6821
										LG4-85	S310
										LG4-86	S3470
										LG4-87	S2654
										LG4-88	S956
										LG4-89	S2890
										LG4-90	S968
										LG4-91	S9384
										LG4-92	S3590
										LG4-93	S22171
										LG4-94	S5721
										LG4-95	S4285
										LG4-96	S891
										LG4-97	S4396
										LG4-98	S4290
										LG4-99	S4229
										LG4-100	S1939
										LG4-101	S1722
										LG4-102	S5234
										LG4-103	E-ACAXM-CAT04
										LG4-104	S3202
										LG4-105	S251
										LG4-106	S830
										LG4-107	S2607
										LG4-108	S3530
										LG4-109	S8550
										LG4-110	S2829
										LG4-111	S7363
										LG4-112	S4089
										LG4-113	S125
										LG4-114	S778
										LG4-115	S3958
										LG4-116	S345
										LG4-117	S3223
										LG4-118	S7358
										LG4-119	S7644
										LG4-120	S685
										LG4-121	S2320
										LG4-122	S2732
										LG4-123	S843
										LG4-124	S15774
										LG4-125	S26121
										LG4-126	E-ACTXM-CAT06
										LG4-127	S2361
										LG4-128	SJCR4U31392
										LG4-129	S6387
										LG4-130	E-ACAXM-CTG01
										LG4-131	S9366
	Linkage Group	Marker	The anchored scaffold	Marker	The anchored scaffold	Marker	The anchored scaffold	Linkage Group	Marker	Linkage Group	Marker
403	LG5-1	E0734-1	scaffold734	G81	scaffold734	Jatr1006	scaffold734	LG5-1	S145_Wu	LG5-1	S1663
404	LG5-2	E2166-3	scaffold2166	SSR69	scaffold734	Jatr852	scaffold906	LG5-2	S1198_Wu	LG5-2	E-AAGXM-CAT10
405	LG5-3	E2166-2	scaffold2166	1411751|12281062	scaffold734	eSNP0022	scaffold617	LG5-3	E-AAGXM-CAT10	LG5-3	S7775
406	LG5-4	E2166-1	scaffold2166	G7	scaffold906	eSNP0083	scaffold906	LG5-4	S665_Wu	LG5-4	S3456
407	LG5-5	E0906-22	scaffold906	1402962|12349769	scaffold906	OLE-III-1	scaffold906	LG5-5	S107_Wu	LG5-5	S14026
408	LG5-6	E0906-10	scaffold906	1409778|12321756	scaffold906	OLE-III-2	scaffold906	LG5-6	S267_Wu	LG5-6	S5682
409	LG5-7	E0906-16	scaffold906	1413825|12301909	scaffold906	OLE-III-3	scaffold906	LG5-7	S146_Wu	LG5-7	S4941
410	LG5-8	E0906-18	scaffold906	AG435	scaffold906	OLE-III-4	scaffold906	LG5-8	S257_Wu	LG5-8	S1410
411	LG5-9	X5-2	scaffold906	SNP12028	scaffold906	OLE-III-5	scaffold906	LG5-9	S523_Wu	LG5-9	S24719
412	LG5-10	E0906-20	scaffold906	G52	scaffold906	OLE-III-6	scaffold906	LG5-10	S311_Wu	LG5-10	S7190
413	LG5-11	E0906-9	scaffold906	1404287|12324797	scaffold906	eSNP01164	scaffold675	LG5-11	S650_Wu	LG5-11	S17924
414	LG5-12	F1-61	scaffold906	1398999|12321959	scaffold906	OLE1-1	scaffold328	LG5-12	S913_Wu	LG5-12	S3432
415	LG5-13	E0906-17	scaffold906	JCT7	scaffold906	OLE1-2	scaffold328	LG5-13	S32_Wu	LG5-13	S8704
416	LG5-14	E0906-12	scaffold906	1399888|12301012	scaffold906	BADH-1	scaffold328	LG5-14	S318_Wu	LG5-14	S15731
417	LG5-15	E0906-6	scaffold906	1398679|12329288	scaffold906	BADH-2	scaffold328	LG5-15	S332_Wu	LG5-15	S10854
418	LG5-16	E0906-3	scaffold906	1406853|12345796	scaffold328	BADH-3	scaffold328	LG5-16	S101_Wu	LG5-16	E-ACTXM-CTG01
419	LG5-17	F2-26	scaffold906	G104	scaffold328	BADH-4	scaffold328	LG5-17	S234_Wu	LG5-17	S4531
420	LG5-18	E0906-21	scaffold906	1410174|12318426	scaffold328	BADH-5	scaffold328	LG5-18	S260_Wu	LG5-18	S1988
421	LG5-19	E0906-19	scaffold906	SNP14731	scaffold328	BADH-6	scaffold328	LG5-19	S1250_Wu	LG5-19	S289
422	LG5-20	E0906-8	scaffold906	1414376|12292845	scaffold328	Jcuint002	scaffold328	LG5-20	S95_Wu	LG5-20	S1586
423	LG5-21	E0906-13	scaffold906	1415033|12293274	scaffold328	Jatr746	scaffold328	LG5-21	S251_Wu	LG5-21	S4020
424	LG5-22	E0906-5	scaffold906	1405324|12333201	multiple hits	Jcuint094	scaffold328	LG5-22	S158_Wu	LG5-22	S6579
425	LG5-23	X5-3	scaffold328	1415596|12289965	scaffold328	eSNP0058	scaffold328	LG5-23	S208_Wu	LG5-23	S6518
426	LG5-24	X5-8	scaffold328	1416950|12276217	scaffold328	Jatr735	scaffold328	LG5-24	S1991_Wu	LG5-24	S14330
		Purple		1399548|12316523	scaffold328	Jatr967	scaffold328	LG5-25	S424_Wu	LG5-25	S5297
427	LG5-25	E523-2	scaffold523	1403834|12326123	scaffold328	Jcuint288	scaffold328	LG5-26	S984_Wu	LG5-26	S5063
428	LG5-26	E523-1	scaffold523	1401127|12297649	scaffold328	eSNP0228	scaffold251	LG5-27	S515_Wu	LG5-27	S11964
429	LG5-27	E523-3	scaffold523	SNP12318	scaffold328	eSNP0956	scaffold251	LG5-28	S3_Wu	LG5-28	S6457
430	LG5-28	X5-9	scaffold523	G62	scaffold328	Jatr739	scaffold523	LG5-29	S374_Wu	LG5-29	S19768
431	LG5-29	E251-5	scaffold251	1402490|12350679	scaffold328	Jatr945	scaffold328	LG5-30	S572_Wu	LG5-30	S19344
432	LG5-30	E251-7	scaffold251	1399756|12302951	scaffold328	Jcuint354	scaffold328	LG5-31	E-ACAXM-CTA01	LG5-31	S2605
433	LG5-31	E251-6	scaffold251	1417575|12272422	scaffold328	Jatr388	scaffold523	LG5-32	S976_Wu	LG5-32	S6065
434	LG5-32	E251-3	scaffold251	1410258|12313412	scaffold328	eSNP0250	scaffold251	LG5-33	E-AAGXM-CAT02	LG5-33	S3961
435	LG5-33	E251-1	scaffold251	1402899|12343285	scaffold328	eSNP0893	scaffold251	LG5-34	S1106_Wu	LG5-34	S2540
436	LG5-34	E0984-3	scaffold984	1406341|12349947	scaffold328	Jcuint192	scaffold990	LG5-35	E-ACTXM-CTG01	LG5-35	S6391
437	LG5-35	E0984-2	scaffold984	1401093|12362750	scaffold328	Jcuint021	scaffold158	LG5-36	S568_Wu	LG5-36	S5210
438	LG5-36	E0318-1	scaffold318	1413338|12275995	scaffold328	Jatr478	scaffold95	LG5-37	TERI_JcSSR2626	LG5-37	S6418
439	LG5-37	SNP0318-1	scaffold318	SNP11133	scaffold328	Jatr790	scaffold251	LG5-38	W_Jatr739	LG5-38	S444
440	LG5-38	E0311-1	scaffold311	AG706	scaffold328	Jcuint264	scaffold251	LG5-39	S328_Wu	LG5-39	S1498
441	LG5-39	E0311-4	scaffold311	EST05	scaffold328	eSNP0145	scaffold3	LG5-40	W_Jcuint002	LG5-40	S1344
442	LG5-40	E0311-2	scaffold311	1408945|12330704	scaffold523	eSNP0183	scaffold3	LG5-41	S403_Wu	LG5-41	S14024
443	LG5-41	SNP0318-2	scaffold318	1409436|12311622	scaffold251	eSNP0808	scaffold3	LG5-42	E-ACTXM-CAT07	LG5-42	S2170
444	LG5-42	E0515-1	scaffold515	AG517	scaffold251	Jcuint287	scaffold3	LG5-43	S906_Wu	LG5-43	S7478
445	LG5-43	E0311-5	scaffold311	1411325|12283460	scaffold251	SNP035-1	scaffold60	LG5-44	E-AAXM-CTG01	LG5-44	S1145
446	LG5-44	E0976-2	scaffold976	1405640|12282064	scaffold251	SNP035-2	scaffold60	LG5-45	S2166_Wu	LG5-45	S1273
447	LG5-45	E0260-1	scaffold260	1407850|12321642	scaffold251	SNP035-3	scaffold60	LG5-46	S734_Wu	LG5-46	S4815
448	LG5-46	X5-15	scaffold95	1407809|12343704	scaffold251	SNP035-4	scaffold60	LG5-47	E-ACTXM-CTA13	LG5-47	S440
449	LG5-47	F2-51	scaffold95	1412855|12275696	scaffold260	eSNP0277	scaffold523			LG5-48	S5361
450	LG5-48	F5-10	scaffold403	1409443|12325334	scaffold251	eSNP0216	scaffold318			LG5-49	S5573
451	LG5-49	F1-38	scaffold32	1415795|12288678	scaffold251					LG5-50	S6852
452	LG5-50	E0515-2	scaffold515	1407116|12346515	scaffold251					LG5-51	S207
453	LG5-51	E0650-2	scaffold650	1402763|12350195	scaffold311					LG5-52	S8063
454	LG5-52	E0107-1	scaffold107	1413246|12304737	scaffold95					LG5-53	S7312
455	LG5-53	SNP0563-4	scaffold563	1403512|12267345	scaffold95					LG5-54	S17097
456	LG5-54	SNP0563-2	scaffold563	1416248|12283374	scaffold32					LG5-55	S5550
457	LG5-55	SNP0563-3	scaffold563	A220b	no hits					LG5-56	S8535
458	LG5-56	SNP0563-1	scaffold563	G192	scaffold572					LG5-57	S5075
459	LG5-57	E0650-1	scaffold650	G123	scaffold665					LG5-58	S72
460	LG5-58	SNP0158-2	scaffold158	Jcuint021	scaffold158					LG5-59	S4003
461	LG5-59	E0332-2	scaffold332	AG183	scaffold3					LG5-60	S9231
462	LG5-60	E1403	scaffold1403							LG5-61	S3359
463	LG5-61	E0146-2	scaffold146							LG5-62	S1171
464	LG5-62	SNP0685-1	scaffold685							LG5-63	S7643
465	LG5-63	E0374-2	scaffold374							LG5-64	S2586
466	LG5-64	E0506-2	scaffold506							LG5-65	S4146
467	LG5-65	E0457-1	scaffold457							LG5-66	S4423
468	LG5-66	SNP0145-1	scaffold145							LG5-67	S3978
469	LG5-67	E0267-1	scaffold267							LG5-68	S1876
470	LG5-68	E0685-r1	scaffold685							LG5-69	S1063
471	LG5-69	E0146-3	scaffold146							LG5-70	S6651
472	LG5-70	E0146-4	scaffold146							LG5-71	S18761
473	LG5-71	E0506-1	scaffold506							LG5-72	S14672
474	LG5-72	E0913-1	scaffold913							LG5-73	S9468
475	LG5-73	E0913-3	scaffold913							LG5-74	S1363
476	LG5-74	SNP0282-2	scaffold282							LG5-75	S2350
477	LG5-75	E0060-1	scaffold60							LG5-76	S1136
478	LG5-76	F5-78	scaffold1106							LG5-77	S2374
479	LG5-77	E1106-2	scaffold1106							LG5-78	S11262
480	LG5-78	E1106-3	scaffold1106							LG5-79	S187
481	LG5-79	E1106-1	scaffold1106							LG5-80	S6028
482	LG5-80	SNP0424-2	scaffold424							LG5-81	S4817
483	LG5-81	E0208-2	scaffold208							LG5-82	S1568
484	LG5-82	F5-256	scaffold208							LG5-83	S161
485	LG5-83	E0601-1	scaffold601							LG5-84	S44
486	LG5-84	E0615-5	scaffold615							LG5-85	S1839
487	LG5-85	E0615-3	scaffold615							LG5-86	S3619
488	LG5-86	E0615-2	scaffold615							LG5-87	S675
489	LG5-87	E0615-4	scaffold615							LG5-88	S1954
490	LG5-88	SNP0424-3	scaffold424							LG5-89	S2463
491	LG5-89	E0665-2	scaffold665							LG5-90	S2235
492	LG5-90	F1-90	scaffold3							LG5-91	W_Jatr739
493	LG5-91	F1-102	scaffold3							LG5-92	TERI_JcSSR2626
494	LG5-92	E1256	scaffold1256							LG5-93	S5374
495	LG5-93	E0035-1	scaffold35							LG5-94	S249
496	LG5-94	E0665-1	scaffold665							LG5-95	S313
497	LG5-95	E0374-1	scaffold374							LG5-96	S5019
498	LG5-96	E0234-1	scaffold234							LG5-97	S94
										LG5-98	S579
										LG5-99	S35
										LG5-100	S213
										LG5-101	S1679
										LG5-102	W_Jcuint002
										LG5-103	S3161
										LG5-104	S787
										LG5-105	S114
										LG5-106	S2527
										LG5-107	S3454
										LG5-108	S3546
										LG5-109	S4484
										LG5-110	S700
										LG5-111	S9
										LG5-112	S3149
										LG5-113	S1594
										LG5-114	S2370
										LG5-115	S911
										LG5-116	S1104
										LG5-117	S100
										LG5-118	S1429
										LG5-119	S11093
										LG5-120	S111
										LG5-121	S15091
										LG5-122	S190
										LG5-123	S593
										LG5-124	S269
										LG5-125	S441
										LG5-126	S3665
										LG5-127	S5952
										LG5-128	S6018
										LG5-129	S7213
										LG5-130	S4
										LG5-131	S872
										LG5-132	E-ACTXM-CAT07
										LG5-133	S28
										LG5-134	S160
										LG5-135	S346
										LG5-136	S5111
										LG5-137	S2234
										LG5-138	S770
										LG5-139	S1
										LG5-140	S3
										LG5-141	S670
										LG5-142	S2802
										LG5-143	S5493
										LG5-144	S39
										LG5-145	S592
										LG5-146	S19478
										LG5-147	S434
										LG5-148	S1890
										LG5-149	S9155
										LG5-150	S10676
										LG5-151	E-ACTXM-CTA13
	Linkage Group	Marker	The anchored scaffold	Marker	The anchored scaffold	Marker	The anchored scaffold	Linkage Group	Marker	Linkage Group	Marker
499	LG6-1	X10-15	scaffold473	SNP12983	scaffold779	eSNP0867	scaffold122	LG6-1	E-AAGXM-CAT15	LG6-1	E-AAXM-CTG03
500	LG6-2	X6-35	scaffold473	SNP13864	scaffold779	eSNP0161	scaffold779	LG6-2	E-AAXM-CTG03	LG6-2	S300
501	LG6-3	X6-33	scaffold473	G41	scaffold779	eSNP0198	scaffold779	LG6-3	S273_Wu	LG6-3	S2393
502	LG6-4	E0729-6	scaffold729	1406628|12346310	scaffold779	eSNP0194	scaffold779	LG6-4	S473_Wu	LG6-4	S2041
503	LG6-5	E0729-3	scaffold729	SNP23789	scaffold779	eSNP0120	scaffold779	LG6-5	S729_Wu	LG6-5	S1932
504	LG6-6	E0729-2	scaffold729	1399898|12301058	scaffold779	eSNP0123	scaffold779	LG6-6	S565_Wu	LG6-6	S3169
505	LG6-7	E0729-7	scaffold729	G63	scaffold779	eSNP0156	scaffold779	LG6-7	S682_Wu	LG6-7	S882
506	LG6-8	E0729-5	scaffold729	1416503|12284061	scaffold779	Jatr397	scaffold779	LG6-8	S897_Wu	LG6-8	S1176
507	LG6-9	E0729-4	scaffold729	1402042|12351521	scaffold122	Jatr826	scaffold779	LG6-9	S349_Wu	LG6-9	E-AACXM-CAG05
508	LG6-10	E0682-r4	scaffold682	1406094|12327974	scaffold122	Jatr209	scaffold779	LG6-10	S1286_Wu	LG6-10	S6488
509	LG6-11	E0729-8	scaffold729	1407257|12341294	scaffold122	Jatr662	scaffold779	LG6-11	S201_Wu	LG6-11	S3362
510	LG6-12	E0682-r1	scaffold682	SNP14574	scaffold122	eSNP0255	scaffold779	LG6-12	E-AACXM-CAG05	LG6-12	S334
511	LG6-13	E0682-r3	scaffold682	1414728|12295900	scaffold122	eSNP0823	scaffold779	LG6-13	E-ACTXM-CTA07	LG6-13	S6897
512	LG6-14	E0682-13	scaffold682	1413306|12275963	scaffold122	Jcuint098	scaffold779	LG6-14	S241_Wu	LG6-14	S8449
513	LG6-15	E0682-11	scaffold682	1408588|12337939	scaffold122	eSNP0177	scaffold779	LG6-15	S944_Wu	LG6-15	S228
514	LG6-16	E0682-9	scaffold682	1401710|12276711	scaffold1078	eSNP0288	scaffold779	LG6-16	S1559_Wu	LG6-16	S6964
515	LG6-17	F4-82	scaffold682	1403070|12347851	scaffold1078	Jatr301	scaffold779	LG6-17	S106_Wu	LG6-17	S12917
516	LG6-18	X6-30	scaffold682	1399793|12313280	scaffold843	Jatr773	scaffold779	LG6-18	S161_Wu	LG6-18	E-ACTXM-CTA05
517	LG6-19	E0682-12	scaffold682	1401416|12359883	scaffold843	Jatr1013	scaffold779	LG6-19	S1334_Wu	LG6-19	S6066
518	LG6-20	E0201-3	scaffold201	G185	scaffold843	Jcuint312	scaffold779	LG6-20	S948_Wu	LG6-20	S7813
519	LG6-21	X6-28	scaffold897	1404193|12358065	scaffold843	eSNP0053	scaffold122	LG6-21	S604_Wu	LG6-21	S2154
520	LG6-22	E0201-8	scaffold201	1407917|12342859	scaffold843	Jatr839	scaffold122	LG6-22	E-ACTXM-CTA10	LG6-22	S1068
521	LG6-23	E0897-2	scaffold897	SNP6044	scaffold843	Jcuint005	scaffold122	LG6-23	S699_Wu	LG6-23	S368
522	LG6-24	E0349-1	scaffold349	1407011|12325609	scaffold843	Jcuint311	scaffold122	LG6-24	S958_Wu	LG6-24	S303
523	LG6-25	E0349-2	scaffold349	SNP15286	scaffold843	Jatr798	scaffold122	LG6-25	S1781_Wu	LG6-25	S8598
524	LG6-26	E0897-1	scaffold897	SNP10696	scaffold250	Jcuint106	multiple hits	LG6-26	S156_Wu	LG6-26	S4546
525	LG6-27	E1286-1	scaffold1286	1402627|12292363	scaffold250	Jcuint036	scaffold843	LG6-27	S485_Wu	LG6-27	S16855
526	LG6-28	E1286-5	scaffold1286	1412114|12289777	scaffold250	eSNP0187	scaffold843	LG6-28	S192_Wu	LG6-28	S3748
527	LG6-29	E1286-7	scaffold1286	EST07	scaffold250	Jatr865	scaffold250	LG6-29	S69_Wu	LG6-29	S3552
528	LG6-30	E1286-3	scaffold1286	1403682|12266949	scaffold250	Jatr643	scaffold250	LG6-30	S151_Wu	LG6-30	S7963
529	LG6-31	E1286-6	scaffold1286	1405620|12330593	scaffold250	Jatr121	scaffold250	LG6-31	S1002_Wu	LG6-31	S8655
530	LG6-32	F5-242	scaffold241	AG529	scaffold1334	Jatr800	scaffold250	LG6-32	S1056_Wu	LG6-32	S2265
531	LG6-33	E241-2	scaffold241	1399738|12303883	scaffold500	Jatr915	scaffold78	LG6-33	S407_Wu	LG6-33	S2273
532	LG6-34	E241-6	scaffold241	SNP1785	scaffold1206	Jcuint219	scaffold97	LG6-34	S258_Wu	LG6-34	E-ACTXM-CTA10
533	LG6-35	E0201-9	scaffold201	1408757|12331269	scaffold326	eSNP0094	scaffold241	LG6-35	S199_Wu	LG6-35	S4533
534	LG6-36	F4-90	scaffold78	1405895|12347928	scaffold507	Jatr190	scaffold78	LG6-36	S475_Wu	LG6-36	S4330
535	LG6-37	X6-22	scaffold78	G107	scaffold69	Jatr788	scaffold241	LG6-37	S709_Wu	LG6-37	S2631
536	LG6-38	X6-20	scaffold78	G103	scaffold106	Jatr906	scaffold241	LG6-38	S1174_Wu	LG6-38	S853
537	LG6-39	E0078-4	scaffold78	1406827|12348279	scaffold201	Jcuint061	scaffold241	LG6-39	S389_Wu	LG6-39	S6325
538	LG6-40	F1-99	scaffold78	1405122|12351090	scaffold201	Jcuint111	multiple hits	LG6-40	S250_Wu	LG6-40	S4701
539	LG6-41	E0628-3	scaffold628	SSR613	scaffold241	SNP048-1	scaffold241	LG6-41	S845_Wu	LG6-41	S2686
540	LG6-42	E0628-2	scaffold628	G76	scaffold201	SNP048-2		LG6-42	S843_Wu	LG6-42	S2183
541	LG6-43	E0628-1	scaffold628	1401113|12362775	scaffold682	SNP048-3		LG6-43	S196_Wu	LG6-43	S4939
542	LG6-44	E0604	scaffold604	G6	scaffold201	SNP048-4		LG6-44	S1457_Wu	LG6-44	S2919
543	LG6-45	E0948-1	scaffold948	SNP3270	scaffold201	Jcuint233	multiple hits	LG6-45	E-ACTXM-CTA05	LG6-45	S6951
544	LG6-46	E97-1	scaffold97	1408192|12335710	scaffold682	SNP12FAD7	scaffold897	LG6-46	S1055_Wu	LG6-46	S1332
545	LG6-47	E0805-1	scaffold805	1408142|12341130	scaffold473	SNP12FAD8		LG6-47	S1078_Wu	LG6-47	S742
546	LG6-48	SNP0303-1	scaffold303	Jcuint215	scaffold473	Jatr747	scaffold897	LG6-48	S247_Wu	LG6-48	S5051
547	LG6-49	SNP0699	scaffold699	AG176	scaffold473	Jcuint206	scaffold897	LG6-49	S122_Wu	LG6-49	S14191
548	LG6-50	E1429	scaffold1429			SNP12FAD1	scaffold897	LG6-50	S2033_Wu	LG6-50	S690
549	LG6-51	E0909	scaffold909			SNP12FAD2		LG6-51	E-ACTXM-CTG09	LG6-51	SJCR4U39085
550	LG6-52	E1002-1	scaffold1002			SNP12FAD3		LG6-52	E-AAXM-CTG04	LG6-52	S2676
551	LG6-53	SNP0485-2	scaffold485			SNP12FAD4		LG6-53	S1266_Wu	LG6-53	S3701
552	LG6-54	SNP1036	scaffold1036			SNP12FAD5		LG6-54	S779_Wu	LG6-54	S19705
553	LG6-55	E0161-1	scaffold161			SNP12FAD6				LG6-55	S2460
554	LG6-56	SNP1056-1	scaffold1056			eSNP0068	scaffold201			LG6-56	S17796
555	LG6-57	SNP0301-2	scaffold301			Jcuint278	scaffold682			LG6-57	S416
556	LG6-58	SNP0860-2	scaffold860			Jatr384	scaffold473			LG6-58	S7347
557	LG6-59	E0192-2	scaffold192			Jcuint215	scaffold473			LG6-59	S2742
558	LG6-60	E0638-1	scaffold638			Jcuint321	scaffold473			LG6-60	S1908
559	LG6-61	SNP0301-3	scaffold301			Jatr152	scaffold473			LG6-61	S152
560	LG6-62	SNP1457-2	scaffold1457			Jatr986	scaffold473			LG6-62	S19826
561	LG6-63	SNP0196-1	scaffold196			eSNP0246	scaffold473			LG6-63	S1280
562	LG6-64	E0258-1	scaffold258			eSNP0227	scaffold473			LG6-64	S10886
563	LG6-65	E0162-1	scaffold162							LG6-65	S2821
564	LG6-66	E0507-1	scaffold507							LG6-66	S262
565	LG6-67	E0106-3	scaffold106							LG6-67	S683
566	LG6-68	E0648	scaffold648							LG6-68	S8363
567	LG6-69	E0389-1	scaffold389							LG6-69	S1774
568	LG6-70	E0565-1	scaffold565							LG6-70	S4186
569	LG6-71	E0407-1	scaffold407							LG6-71	S16496
570	LG6-72	E0475-1	scaffold475							LG6-72	S11114
571	LG6-73	E0199-2	scaffold199							LG6-73	S1692
572	LG6-74	E0156-1	scaffold156							LG6-74	S7402
573	LG6-75	E0156-3	scaffold156							LG6-75	S101
574	LG6-76	E0250-1	scaffold250							LG6-76	S2135
575	LG6-77	E0106-1	scaffold106							LG6-77	S3534
576	LG6-78	E0106-2	scaffold106							LG6-78	S3468
577	LG6-79	E0389-3	scaffold389							LG6-79	S3517
578	LG6-80	E01266-1r	scaffold1266							LG6-80	S1559
579	LG6-81	E0500-1	scaffold500							LG6-81	S5590
580	LG6-82	E0069-1	scaffold69							LG6-82	S2619
581	LG6-83	E1206-1	scaffold1206							LG6-83	S22238
582	LG6-84	E1334-1	scaffold1334							LG6-84	S12906
583	LG6-85	E1130-2	scaffold1130							LG6-85	S3659
584	LG6-86	E1130-1	scaffold1130							LG6-86	S1766
585	LG6-87	SNP0709-2	scaffold709							LG6-87	S3949
586	LG6-88	E0389-4	scaffold389							LG6-88	S5353
587	LG6-89	E250-3	scaffold250							LG6-89	E-ACTXM-CTG09
588	LG6-90	E0250-2	scaffold250							LG6-90	E-AAXM-CTG04
589	LG6-91	X6-17	scaffold250							LG6-91	S668
590	LG6-92	X6-19	scaffold250							LG6-92	S2146
591	LG6-93	F1-92	scaffold843							LG6-93	S5738
592	LG6-94	E0843-14	scaffold843							LG6-94	S9705
593	LG6-95	E0843-13	scaffold843							LG6-95	S82
594	LG6-96	E0843-3	scaffold843							LG6-96	S31
595	LG6-97	E0843-7	scaffold843							LG6-97	S8021
596	LG6-98	E0843-4	scaffold843							LG6-98	S17612
597	LG6-99	E0843-10	scaffold843							LG6-99	S3419
598	LG6-100	E0843-16	scaffold843							LG6-100	S9010
599	LG6-101	E0843-12	scaffold843							LG6-101	S932
600	LG6-102	E1055-4	scaffold1055							LG6-102	S2824
601	LG6-103	E1055-6	scaffold1055							LG6-103	S14161
602	LG6-104	E1055-2	scaffold1055							LG6-104	S1529
603	LG6-105	E1055-3	scaffold1055							LG6-105	S4564
604	LG6-106	E1055-8	scaffold1055							LG6-106	S1759
605	LG6-107	E1055-9	scaffold1055							LG6-107	S1086
606	LG6-108	E1078-15	scaffold1078							LG6-108	S551
607	LG6-109	E1078-11	scaffold1078							LG6-109	S135
608	LG6-110	E1078-4	scaffold1078							LG6-110	S10370
609	LG6-111	E1078-1	scaffold1078							LG6-111	S8480
610	LG6-112	E1078-10	scaffold1078							LG6-112	S99
611	LG6-113	E1078-9	scaffold1078							LG6-113	S3278
612	LG6-114	E1078-6	scaffold1078							LG6-114	S3784
613	LG6-115	E1078-7	scaffold1078							LG6-115	S5584
614	LG6-116	E1078-2	scaffold1078							LG6-116	S818
615	LG6-117	E1078-3	scaffold1078							LG6-117	S17290
616	LG6-118	E1078-8	scaffold1078							LG6-118	S16938
617	LG6-119	SNP0247-2	scaffold247							LG6-119	S5664
618	LG6-120	E1078-13	scaffold1078							LG6-120	S2025
619	LG6-121	X6-12	scaffold122							LG6-121	S265
620	LG6-122	E2033-2	scaffold2033							LG6-122	S326
621	LG6-123	E2033-1	scaffold2033							LG6-123	S7968
622	LG6-124	E2033-3	scaffold2033							LG6-124	S4375
623	LG6-125	E2033-6	scaffold2033							LG6-125	S4736
624	LG6-126	F4-6	scaffold779							LG6-126	S1808
625	LG6-127	X6-9	scaffold779							LG6-127	S27054
626	LG6-128	X6-6	scaffold779							LG6-128	S4717
627	LG6-129	F5-231	scaffold779							LG6-129	S27
628	LG6-130	F4-27	scaffold779							LG6-130	S3713
629	LG6-131	X6-4	scaffold779							LG6-131	S5122
630	LG6-132	F5-203	scaffold779							LG6-132	S2046
631	LG6-133	F5-24	scaffold779							LG6-133	S1732
										LG6-134	S1157
										LG6-135	S192
										LG6-136	S3895
										LG6-137	S2841
	Linkage Group	Marker	The anchored scaffold	Marker	The anchored scaffold	Marker	The anchored scaffold	Linkage Group	Marker	Linkage Group	Marker
632	LG7-1	F5-277	scaffold502	1409595|12324146	scaffold502	eSNP0855	scaffold502	LG7-1	S813_Wu	LG7-1	S1869
633	LG7-2	X7-2	scaffold502	1409650|12329380	scaffold502	eSNP0285	scaffold502	LG7-2	S975_Wu	LG7-2	S16786
634	LG7-3	X7-3	scaffold502	1409592|12311291	scaffold502	eSNP0930	scaffold502	LG7-3	TERI_JcSSR2742	LG7-3	S4081
635	LG7-4	F1-59	scaffold502	AG643	scaffold502	Jatr220	scaffold502	LG7-4	E-ACAXM-CTA12	LG7-4	S558
636	LG7-5	X7-4	scaffold42	SNP12027	scaffold502	eSNP0203	scaffold502	LG7-5	E-ACTXM-CTA11	LG7-5	S10620
637	LG7-6	E0529-3	scaffold529	G58	scaffold502	eSNP0095	scaffold502	LG7-6	E-ACTXM-CAT05	LG7-6	S3070
638	LG7-7	F2-41	scaffold1121	SNP1854	scaffold502	eSNP0154	scaffold502	LG7-7	S170_Wu	LG7-7	S1232
639	LG7-8	E1121-4	scaffold1121	G39	scaffold502	eSNP0077	scaffold502	LG7-8	S870_Wu	LG7-8	S2966
640	LG7-9	E1121-5	scaffold1121	G48	scaffold42	Jatr638	scaffold502	LG7-9	S502_Wu	LG7-9	E-ACTXM-CTA11
641	LG7-10	E1121-1	scaffold1121	Jatr845	scaffold42	Jatr883	scaffold502	LG7-10	W_Jatr845	LG7-10	TERI_JcSSR2742
642	LG7-11	E1121-2	scaffold1121	1400474|12285467	scaffold42	Jcuint267	scaffold42	LG7-11	S61_Wu	LG7-11	S3995
643	LG7-12	E1121-3	scaffold1121	1398193|12345483	scaffold42	eSNP0899	scaffold42	LG7-12	S1579_Wu	LG7-12	S2725
644	LG7-13	E1121-6	scaffold1121	1408932|12337291	scaffold529	Jatr845	scaffold42	LG7-13	TERI_JcSSR2749	LG7-13	S1108
645	LG7-14	F5-217	scaffold390	1402100|12332506	scaffold529	Jatr802	scaffold529	LG7-14	S42_Wu	LG7-14	S6744
646	LG7-15	E0838-2	scaffold838	1398939|12323262	scaffold390	Jatr628	scaffold1149	LG7-15	S1121_Wu	LG7-15	S1204
647	LG7-16	E0838-1	scaffold838	1409401|12326003	scaffold390	eSNP0147	scaffold390	LG7-16	E-AAXM-CTG06	LG7-16	S795
648	LG7-17	E0749-1	scaffold749	1400336|12287926	scaffold838	Jatr850	scaffold390	LG7-17	S1149_Wu	LG7-17	S11338
649	LG7-18	E0749-3	scaffold749	1407842|12323323	scaffold1149	Jcuint045	scaffold391	LG7-18	S529_Wu	LG7-18	S12997
650	LG7-19	E1149-1	scaffold1149	G17	scaffold1149	eSNP0184	scaffold390	LG7-19	S390_Wu	LG7-19	E-ACTXM-CAT05
651	LG7-20	E1149-2	scaffold1149	AG616	scaffold1149	Jcuint151	scaffold795	LG7-20	S838_Wu	LG7-20	S9914
652	LG7-21	E0749-9	scaffold749	1404686|12285157	scaffold391	Jcuint033	scaffold82	LG7-21	S391_Wu	LG7-21	S7819
653	LG7-22	X7-13	scaffold749	1418450|12267776	scaffold85	Jcuint060	scaffold143	LG7-22	S143_Wu	LG7-22	S8879
654	LG7-23	E0657-2	scaffold657	AG639	scaffold352	Jatr109	scaffold749	LG7-23	S653_Wu	LG7-23	S118
655	LG7-24	X7-9	scaffold391	1408834|12338009	scaffold430	eSNP0155	scaffold537	LG7-24	S708_Wu	LG7-24	S132
656	LG7-25	E0813	scaffold813	1409256|12312963	scaffold82	eSNP0200	scaffold537	LG7-25	S82_Wu	LG7-25	S664
657	LG7-26	E0831	scaffold831	1401137|12297663	scaffold143	eSNP0807	scaffold537	LG7-26	S749_Wu	LG7-26	S11
658	LG7-27	E0619	scaffold619	1402816|12348077	scaffold143	Jatr610	scaffold341	LG7-27	S430_Wu	LG7-27	S7641
659	LG7-28	E0423-1	scaffold423	1398222|12344025	scaffold82	Jatr866	scaffold331	LG7-28	S878_Wu	LG7-28	S1001
660	LG7-29	SNP0371-1	scaffold371	1400933|12362961	scaffold82	eSNP0922	scaffold341	LG7-29	S410_Wu	LG7-29	S3796
661	LG7-30	E0061-2	scaffold61	1399563|12308700	scaffold410	Jcuint077	scaffold341	LG7-30	S657_Wu	LG7-30	S2751
662	LG7-31	E0987-1	scaffold987	1405049|12342465	scaffold410	eSNP0902	scaffold341	LG7-31	S551_Wu	LG7-31	S910
663	LG7-32	SNP0352-1	scaffold352	SNP5464	scaffold255	Jatr969	scaffold341	LG7-32	S414_Wu	LG7-32	S1983
664	LG7-33	SNP0410-2	scaffold410	1400818|12283200	scaffold255	Jcuint201	scaffold341	LG7-33	S508_Wu	LG7-33	S1316
665	LG7-34	SNP0508-1	scaffold508	G53	scaffold8	eSNP0290	scaffold905	LG7-34	S255_Wu	LG7-34	S7743
666	LG7-35	E0058-1	scaffold58	1406769|12276330	scaffold341	eSNP0031	scaffold905	LG7-35	S578_Wu	LG7-35	S2814
667	LG7-36	E0430-1	scaffold430	1401628|12353310	scaffold341	eSNP0284	scaffold905	LG7-36	S1762_Wu	LG7-36	S5154
668	LG7-37	E0708-4	scaffold708	1404489|12357367	scaffold905			LG7-37	S431_Wu	LG7-37	S750
669	LG7-38	E0708-3	scaffold708					LG7-38	E-AAGXM-CAT11	LG7-38	S2880
670	LG7-39	E0708-2	scaffold708					LG7-39	S8_Wu	LG7-39	S6192
671	LG7-40	E0951-2	scaffold951					LG7-40	S537_Wu	LG7-40	S8
672	LG7-41	E0878-1	scaffold878					LG7-41	S1103_Wu	LG7-41	S2319
673	LG7-42	E795-1	scaffold795					LG7-42	E-ACAXM-CAT05	LG7-42	S8824
674	LG7-43	E0585-1	scaffold585					LG7-43	E-ACTXM-CTA04a	LG7-43	S21749
675	LG7-44	E0431-1	scaffold431					LG7-44	S795_Wu	LG7-44	S1835
676	LG7-45	E0253-1	scaffold253					LG7-45	S341_Wu	LG7-45	S2003
677	LG7-46	E0170-3	scaffold170					LG7-46	S1296_Wu	LG7-46	S529
678	LG7-47	E0878-3	scaffold878					LG7-47	S2976_Wu	LG7-47	S21380
679	LG7-48	E0143-1	scaffold143					LG7-48	S1445_Wu	LG7-48	S13743
680	LG7-49	SNP0414-1	scaffold414					LG7-49	S905_Wu	LG7-49	S14452
681	LG7-50	E0578-1	scaffold578					LG7-50	TERI_JcSSR2741	LG7-50	S10464
682	LG7-51	SNP0340-2	scaffold340							LG7-51	S7468
683	LG7-52	E0551-2	scaffold551							LG7-52	S1334
684	LG7-53	E0082-6	scaffold82							LG7-53	S1038
685	LG7-54	E1762-1	scaffold1762							LG7-54	S2078
686	LG7-55	E0951-1	scaffold951							LG7-55	S2773
687	LG7-56	E1060	scaffold1060							LG7-56	S13976
688	LG7-57	E0255-9	scaffold255							LG7-57	S587
689	LG7-58	E0255-1	scaffold255							LG7-58	S3231
690	LG7-59	E0255-4	scaffold255							LG7-59	S5941
691	LG7-60	E0255-2	scaffold255							LG7-60	S1911
692	LG7-61	E0255-10	scaffold255							LG7-61	S4936
693	LG7-62	E0255-6	scaffold255							LG7-62	S9659
694	LG7-63	E0008-8	scaffold8							LG7-63	S8073
695	LG7-64	E0255-7	scaffold255							LG7-64	S1936
696	LG7-65	E0008-2a	scaffold8							LG7-65	S3164
697	LG7-66	E0537-11	scaffold537							LG7-66	S8267
698	LG7-67	E0537-9	scaffold537							LG7-67	S3460
699	LG7-68	E0537-4	scaffold537							LG7-68	S1489
700	LG7-69	E0537-2	scaffold537							LG7-69	S472
701	LG7-70	E0537-7	scaffold537							LG7-70	S47
702	LG7-71	E0537-1	scaffold537							LG7-71	S429
703	LG7-72	E0537-3	scaffold537							LG7-72	S4923
704	LG7-73	E0537-8	scaffold537							LG7-73	S3352
705	LG7-74	F5-193	scaffold537							LG7-74	S2827
706	LG7-75	E0537-12	scaffold537							LG7-75	S2271
707	LG7-76	E0537-10	scaffold537							LG7-76	W_Jatr845
708	LG7-77	X7-15	scaffold331							LG7-77	S15203
709	LG7-78	E0537-5	scaffold537							LG7-78	S80
710	LG7-79	X7-14	scaffold341							LG7-79	E-ACAXM-CAT05
711	LG7-80	F1-56	scaffold341							LG7-80	S2563
712	LG7-81	X7-18	scaffold341							LG7-81	S11956
713	LG7-82	X7-17	scaffold341							LG7-82	S1462
714	LG7-83	E0905-12	scaffold905							LG7-83	S539
715	LG7-84	E0905-16	scaffold905							LG7-84	S2886
716	LG7-85	E0905-8	scaffold905							LG7-85	S1631
717	LG7-86	E0905-13	scaffold905							LG7-86	S15720
718	LG7-87	E0905-10	scaffold905							LG7-87	S5928
719	LG7-88	E0905-11	scaffold905							LG7-88	S8202
720	LG7-89	E0905-4	scaffold905							LG7-89	S2608
721	LG7-90	E0905-6	scaffold905							LG7-90	S4689
722	LG7-91	E0905-7	scaffold905							LG7-91	S3466
723	LG7-92	E0905-9	scaffold905							LG7-92	S2759
724	LG7-93	F1-86	scaffold905							LG7-93	S4871
725	LG7-94	E0905-2	scaffold905							LG7-94	S3332
726	LG7-95	E0905-5	scaffold905							LG7-95	S2925
727	LG7-96	E0905-1	scaffold905							LG7-96	S905
										LG7-97	S1990
										LG7-98	S1481
										LG7-99	S12522
										LG7-100	S5496
										LG7-101	S25825
										LG7-102	S8038
										LG7-103	S2382
										LG7-104	S566
										LG7-105	S8974
										LG7-106	S217
										LG7-107	S8407
										LG7-108	S227
										LG7-109	TERI_JcSSR2749
										LG7-110	S2371
										LG7-111	S934
										LG7-112	S3152
										LG7-113	S6047
										LG7-114	S1172
										LG7-115	S3595
										LG7-116	S2616
										LG7-117	S12029
										LG7-118	S1929
										LG7-119	S179
										LG7-120	S4663
										LG7-121	S3173
										LG7-122	S6538
										LG7-123	S3254
										LG7-124	S8648
										LG7-125	S2061
										LG7-126	S10209
										LG7-127	S5070
										LG7-128	S2412
										LG7-129	S2703
										LG7-130	S3196
										LG7-131	S252
										LG7-132	S6720
										LG7-133	S4520
										LG7-134	S10860
										LG7-135	S5405
										LG7-136	S2609
										LG7-137	S508
										LG7-138	S8997
										LG7-139	S5082
										LG7-140	S4079
										LG7-141	S2534
										LG7-142	S6076
										LG7-143	S1603
										LG7-144	S6914
										LG7-145	S2589
										LG7-146	S1798
										LG7-147	S3963
										LG7-148	S5146
										LG7-149	S11769
										LG7-150	S6604
										LG7-151	S848
										LG7-152	S4852
										LG7-153	S3358
										LG7-154	S4929
										LG7-155	S4747
										LG7-156	S870
										LG7-157	S2153
										LG7-158	S3737
										LG7-159	S5800
										LG7-160	S1406
										LG7-161	S889
										LG7-162	S7896
										LG7-163	S452
										LG7-164	S3984
										LG7-165	S8473
										LG7-166	S6658
										LG7-167	S448
										LG7-168	S364
										LG7-169	S2079
										LG7-170	S415
										LG7-171	S5073
										LG7-172	S1615
										LG7-173	S7899
										LG7-174	S1070
										LG7-175	S3938
										LG7-176	S4808
										LG7-177	S2161
										LG7-178	S573
										LG7-179	S20437
										LG7-180	S1918
										LG7-181	S2013
										LG7-182	S1168
										LG7-183	S58
										LG7-184	S791
										LG7-185	S5429
										LG7-186	S2287
										LG7-187	S9282
										LG7-188	S13936
										LG7-189	S1290
										LG7-190	S976
										LG7-191	S2191
										LG7-192	S70
										LG7-193	S9732
										LG7-194	S771
										LG7-195	S3986
										LG7-196	S585
										LG7-197	S7295
										LG7-198	S169
										LG7-199	S1830
										LG7-200	S2295
										LG7-201	S5310
										LG7-202	S10152
										LG7-203	S691
										LG7-204	S1358
										LG7-205	S3180
										LG7-206	S6126
										LG7-207	S7648
										LG7-208	S1610
										LG7-209	S6236
										LG7-210	S4557
										LG7-211	S2710
										LG7-212	S2150
										LG7-213	S12816
										LG7-214	S9894
										LG7-215	S2331
										LG7-216	S969
										LG7-217	S2656
										LG7-218	S7767
										LG7-219	S1404
										LG7-220	S7990
										LG7-221	S4625
										LG7-222	S3514
										LG7-223	S2543
										LG7-224	S8554
										LG7-225	S19556
										LG7-226	S19052
										LG7-227	S1994
										LG7-228	S397
										LG7-229	S3025
										LG7-230	S6479
										LG7-231	S1727
										LG7-232	S398
										LG7-233	S321
										LG7-234	S15773
										LG7-235	S7307
										LG7-236	S13
										LG7-237	S2900
										LG7-238	S1637
										LG7-239	S701
										LG7-240	S735
										LG7-241	S11023
										LG7-242	S3335
										LG7-243	S5044
										LG7-244	S1114
										LG7-245	S10967
										LG7-246	S3153
										LG7-247	S4739
										LG7-248	S9725
										LG7-249	S9094
										LG7-250	S3553
										LG7-251	S1102
										LG7-252	S1220
										LG7-253	S483
										LG7-254	S98
										LG7-255	S2300
										LG7-256	S456
										LG7-257	S148
										LG7-258	S17173
										LG7-259	S2533
										LG7-260	S960
										LG7-261	S9740
										LG7-262	S11738
										LG7-263	S3115
										LG7-264	S3477
										LG7-265	S964
										LG7-266	TERI_JcSSR2741
										LG7-267	S3186
										LG7-268	S3850
										LG7-269	S1909
										LG7-270	S5753
	Linkage Group	Marker	The anchored scaffold	Marker	The anchored scaffold	Marker	The anchored scaffold	Linkage Group	Marker	Linkage Group	Marker
728	LG8-1	F5-257	scaffold392	1408735|12311855	scaffold392	Jcuint012	scaffold392	LG8-1	E-AAGXM-CAT06	LG8-1	E-ACTXM-CTA03
729	LG8-2	E0392-1r	scaffold392	1415101|12292038	scaffold392	Jatr604	scaffold392	LG8-2	E-ACAXM-CTA04	LG8-2	S2985
730	LG8-3	X8-3	scaffold392	1403363|12355966	scaffold392	Jcuint145	scaffold392	LG8-3	S470_Wu	LG8-3	S57
731	LG8-4	X8-5	scaffold392	1408550|12317774	scaffold392	eSNP0844	scaffold392	LG8-4	S76_Wu	LG8-4	S11643
732	LG8-5	X8-6	scaffold392	1410983|12302149	scaffold392	Jatr989	scaffold392	LG8-5	S664_Wu	LG8-5	S27170
733	LG8-6	F4-72	scaffold392	1404620|12323615	scaffold392	Jcuint154	scaffold392	LG8-6	S51_Wu	LG8-6	S1927
734	LG8-7	X8-7	scaffold392	1400004|12298116	scaffold392	eSNP0973	scaffold392	LG8-7	S1327_Wu	LG8-7	S497
735	LG8-8	X8-10	scaffold392	1407579|12344179	scaffold392	Jatr892	scaffold392	LG8-8	S1081_Wu	LG8-8	S404
736	LG8-9	X8-11	scaffold392	1417726|12277188	scaffold392	eSNP0139	scaffold392	LG8-9	S1855_Wu	LG8-9	S22
737	LG8-10	F5-160	scaffold684	G141C	scaffold392	eSNP0919	scaffold392	LG8-10	S259_Wu	LG8-10	S2147
738	LG8-11	X8-12	scaffold684	1415675|12290711	scaffold392	eSNP0946	scaffold392	LG8-11	S550_Wu	LG8-11	S1003
739	LG8-12	E0046-7	scaffold46	AG343	scaffold392	eSNP0949	scaffold392	LG8-12	S1005_Wu	LG8-12	S232
740	LG8-13	E0046-19	scaffold46	1402363|12360782	scaffold392	Jcuint282	scaffold392	LG8-13	S41_Wu	LG8-13	S379
741	LG8-14	X8-13	scaffold46	1410363|12312021	scaffold392	Jcuint332	scaffold392	LG8-14	S1074_Wu	LG8-14	S7026
742	LG8-15	F1-87	scaffold46	1399799|12313295	scaffold392	eSNP0114	scaffold392	LG8-15	S363_Wu	LG8-15	S1651
743	LG8-16	E0046-6	scaffold46	1410014|12301548	scaffold392	eSNP0045	scaffold127	LG8-16	S226_Wu	LG8-16	S9408
744	LG8-17	E0046-20	scaffold46	EST15	scaffold392	Jatr115	scaffold74	LG8-17	S49_Wu	LG8-17	S9905
745	LG8-18	E0046-10	scaffold46	1404753|12352408	scaffold392	eSNP0159	scaffold363	LG8-18	S128_Wu	LG8-18	S2562
746	LG8-19	E0046-31	scaffold46	1402542|12350116	scaffold392	eSNP0195	scaffold363	LG8-19	S983_Wu	LG8-19	S348
747	LG8-20	F5-258	scaffold46	1403808|12353099	scaffold392	eSNP0979	scaffold392	LG8-20	S136_Wu	LG8-20	S2338
748	LG8-21	E0046-22	scaffold46	1418057|12274491	scaffold392	eSNP0011	scaffold392	LG8-21	S315_Wu	LG8-21	S36
749	LG8-22	E0046-34	scaffold46	JCT23	scaffold392	Jcuint237	scaffold392	LG8-22	S230_Wu	LG8-22	S1748
750	LG8-23	F5-106	scaffold46	1409799|12321798	scaffold392	Jcuint014	scaffold392	LG8-23	S127_Wu	LG8-23	S1573
751	LG8-24	E0046-15	scaffold46	1404368|12324806	scaffold392	eSNP0885	scaffold684	LG8-24	S509_Wu	LG8-24	S1153
752	LG8-25	E1855-11	scaffold1855	1408800|12331282	scaffold392	eSNP0802	scaffold684	LG8-25	S636_Wu	LG8-25	S74
753	LG8-26	E1855-4	scaffold1855	1403397|12345231	scaffold392	eSNP0901	scaffold684	LG8-26	S297_Wu	LG8-26	S84
754	LG8-27	E1855-1	scaffold1855	G56	scaffold392	Jcuint277	scaffold684	LG8-27	S399_Wu	LG8-27	S6267
755	LG8-28	E1855-10	scaffold1855	G44	scaffold684	Jcuint123	scaffold46	LG8-28	S229_Wu	LG8-28	S1788
756	LG8-29	E0297-10	scaffold297	1410964|12302946	scaffold684	eSNP0181	scaffold46	LG8-29	S23_Wu	LG8-29	S3298
757	LG8-30	E0297-1	scaffold297	G144	scaffold46	eSNP0190	scaffold46	LG8-30	S594_Wu	LG8-30	E-AAGXM-CAT06
758	LG8-31	E0297-6	scaffold297	JCT3	scaffold1855	eSNP0119	scaffold1855	LG8-31	S1719_Wu	LG8-31	S652
759	LG8-32	E0297-12	scaffold297	SNP10542	scaffold1855	SNP0065	scaffold698	LG8-32	E-AACXM-CTA08	LG8-32	S110
760	LG8-33	E0297-5a	scaffold297	SNP5294	scaffold297	eSNP0953	scaffold297	LG8-33	S185_Wu	LG8-33	S229
761	LG8-34	E0297-7	scaffold297	1404867|12356283	scaffold297	Jatr855	scaffold41			LG8-34	S5837
762	LG8-35	E1855-6	scaffold1855	1398512|12332989	scaffold297	Jcuint092	scaffold363			LG8-35	S3731
763	LG8-36	E0297-8	scaffold297	1410453|12295424	scaffold297	Jatr851	scaffold74			LG8-36	S9152
764	LG8-37	X8-17	scaffold1855	1400435|12286473	scaffold373	Jatr679	scaffold1855			LG8-37	S7128
765	LG8-38	E0550-7	scaffold550	1409890|12307043	scaffold550	Jatr130	scaffold392			LG8-38	S188
766	LG8-39	SNP0454-1	scaffold454	1416383|12282386	scaffold550					LG8-39	S24
767	LG8-40	E0550-8	scaffold550	1401665|12362006	scaffold550					LG8-40	S13027
768	LG8-41	E0363-4a	scaffold363	1401433|12335072	scaffold183					LG8-41	S12052
769	LG8-42	E0363-4b	scaffold363	G25	scaffold1168					LG8-42	S2756
770	LG8-43	X8-15	scaffold363	1399030|12323739	scaffold74					LG8-43	S12
771	LG8-44	E0363-5	scaffold363	1409407|12326008	scaffold74					LG8-44	S8972
772	LG8-45	E0363-1	scaffold363	1402231|12273031	scaffold74					LG8-45	S5097
773	LG8-46	E0363-2	scaffold363	1407832|12321638	scaffold74					LG8-46	S6983
774	LG8-47	E0363-3	scaffold363	1400138|12295194	scaffold74					LG8-47	S6851
775	LG8-48	E0259-3	scaffold259	SNP10078	scaffold315					LG8-48	S462
776	LG8-49	E0550-2	scaffold550	1404236|12286882	scaffold315					LG8-49	S3245
777	LG8-50	E0550-4	scaffold550	1409122|12336095	scaffold315					LG8-50	S14427
778	LG8-51	E0550-1	scaffold550	G80	scaffold315					LG8-51	S7559
779	LG8-52	F1-76	scaffold550	1418082|12273202	scaffold315					LG8-52	S1089
780	LG8-53	E0550-3	scaffold550	1398701|12328431	scaffold1740					LG8-53	S1910
781	LG8-54	E0259-2	scaffold259	1398342|12338935	scaffold1740					LG8-54	S3578
782	LG8-55	E0486-1	scaffold486	1400616|12361633	scaffold127					LG8-55	S7887
783	LG8-56	E0452-2	scaffold452	1412347|12287752	scaffold127					LG8-56	S4170
784	LG8-57	E0041-7	scaffold41	SNP1351	scaffold23					LG8-57	S11028
785	LG8-58	E0983-1	scaffold983	1410135|12319117	scaffold23					LG8-58	S1629
786	LG8-59	E0094-1	scaffold94	1417789|12271977	scaffold23					LG8-59	S1647
787	LG8-60	E0076-2	scaffold76	1412872|12299419	scaffold23					LG8-60	S966
788	LG8-61	SNP0373-3	scaffold373	1403961|12353916	scaffold23					LG8-61	S893
789	LG8-62	E0888	scaffold888	1399914|12300331	scaffold23					LG8-62	S6676
790	LG8-63	SNP0784-1	scaffold784							LG8-63	S32
791	LG8-64	E0524-1	scaffold524							LG8-64	S1294
792	LG8-65	E0136-1	scaffold136							LG8-65	S2913
793	LG8-66	E0858-3	scaffold858							LG8-66	S2894
794	LG8-67	E0858-1	scaffold858							LG8-67	S3194
795	LG8-68	E0051-2	scaffold51							LG8-68	S2349
796	LG8-69	E0636	scaffold636							LG8-69	S2687
797	LG8-70	E0664-2	scaffold664							LG8-70	S5483
798	LG8-71	SNP1205-3	scaffold1205							LG8-71	S2979
799	LG8-72	E0858-2	scaffold858							LG8-72	S6347
800	LG8-73	E0076-1	scaffold76							LG8-73	S1961
801	LG8-74	E0452-1	scaffold452							LG8-74	S7634
802	LG8-75	E0791-1	scaffold791							LG8-75	S470
803	LG8-76	E0399-1	scaffold399							LG8-76	S259
804	LG8-77	E0041-2	scaffold41							LG8-77	S7152
805	LG8-78	E0995	scaffold995							LG8-78	S8151
806	LG8-79	E0983-3	scaffold983							LG8-79	S2168
807	LG8-80	E0983-2	scaffold983							LG8-80	S12091
808	LG8-81	E1081	scaffold1081							LG8-81	S3903
809	LG8-82	E0907-2	scaffold907							LG8-82	S21439
810	LG8-83	E1021-1	scaffold1021							LG8-83	S8644
811	LG8-84	SNP0198-2	scaffold198							LG8-84	S2628
812	LG8-85	E0185-2	scaffold185							LG8-85	S2084
813	LG8-86	SNP0222-2	scaffold222							LG8-86	SJCR4U39008
814	LG8-87	E0183-2	scaffold183							LG8-87	S13983
815	LG8-88	SNP1074-2	scaffold1074							LG8-88	S166
816	LG8-89	SNP0509-3	scaffold509							LG8-89	S773
817	LG8-90	SNP0509-2	scaffold509							LG8-90	S3885
818	LG8-91	E0136-2	scaffold136							LG8-91	S1014
819	LG8-92	E0049-2	scaffold49							LG8-92	S3296
820	LG8-93	E0128-1	scaffold128							LG8-93	S4921
821	LG8-94	E0041-3	scaffold41							LG8-94	S929
822	LG8-95	E0791-2	scaffold791							LG8-95	S1446
823	LG8-96	E0226-1	scaffold226							LG8-96	S4412
824	LG8-97	E0074-5	scaffold74							LG8-97	S11834
825	LG8-98	E0074-7	scaffold74							LG8-98	S9487
826	LG8-99	X8-16	scaffold74							LG8-99	S1648
827	LG8-100	E0074-6	scaffold74							LG8-100	E-ACAXM-CTA04
828	LG8-101	E0315-3	scaffold315							LG8-101	E-AACXM-CTA08
829	LG8-102	E0074-3	scaffold74							LG8-102	S3364
830	LG8-103	SNP0230-1	scaffold230
831	LG8-104	F5-178	scaffold315
832	LG8-105	E0315-2	scaffold315
833	LG8-106	E0315-1	scaffold315
834	LG8-107	E0127-12	scaffold127
835	LG8-108	E0127-2	scaffold127
836	LG8-109	E1740-4	scaffold1740
837	LG8-110	E1740-5	scaffold1740
838	LG8-111	E1740-1	scaffold1740
839	LG8-112	E1740-6	scaffold1740
840	LG8-113	E0127-6	scaffold127
841	LG8-114	E0127-11	scaffold127
842	LG8-115	E0127-13	scaffold127
843	LG8-116	E0127-5	scaffold127
844	LG8-117	E0127-7	scaffold127
845	LG8-118	E0127-9	scaffold127
846	LG8-119	E0127-14	scaffold127
847	LG8-120	E0127-3	scaffold127
848	LG8-121	E0127-4	scaffold127
849	LG8-122	E0023-3	scaffold23
850	LG8-123	E0023-8	scaffold23
851	LG8-124	E0023-4	scaffold23
852	LG8-125	E0023-2	scaffold23
853	LG8-126	E0023-5	scaffold23
854	LG8-127	E0023-6	scaffold23
855	LG8-128	E0023-1	scaffold23
	Linkage Group	Marker	The anchored scaffold	Marker	The anchored scaffold	Marker	The anchored scaffold	Linkage Group	Marker	Linkage Group	Marker
856	LG9-1	E0815-8	scaffold815	1417866|12270254	scaffold660	Jatr859	scaffold285	LG9-1	E-ACTXM-CTG04	LG9-1	E-ACTXM-CTA06
857	LG9-2	E0815-3	scaffold815	SNP4505	scaffold660	eSNP0948	scaffold173	LG9-2	W_Jatr324	LG9-2	S14414
858	LG9-3	E0815-7	scaffold815	1407197|12345817	scaffold660	eSNP0923	scaffold2	LG9-3	E-ACTXM-CTG06	LG9-3	S8291
859	LG9-4	E0815-5	scaffold815	SNP15086	scaffold660	eSNP0112	scaffold815	LG9-4	S660_Wu	LG9-4	E-ACTXM-CTA12
860	LG9-5	E0072-5	scaffold72	1398068|12349177	scaffold660	eSNP0173	scaffold72	LG9-5	S799_Wu	LG9-5	S3302
861	LG9-6	E0072-2	scaffold72	1400798|12283182	scaffold660	eSNP0059	scaffold872	LG9-6	W_Jatr698	LG9-6	S7198
862	LG9-7	E0072-6	scaffold72	1409966|12322675	scaffold660	Jatr110	scaffold660	LG9-7	S137_Wu	LG9-7	S206
863	LG9-8	E0072-9	scaffold72	G34	scaffold660	eSNP0954	scaffold2	LG9-8	E-AACXM-CAT08a	LG9-8	S6185
864	LG9-9	F5-245	scaffold72	1408474|12340500	scaffold137	Jcuint079	scaffold799	LG9-9	S617_Wu	LG9-9	S194
865	LG9-10	E0072-3	scaffold72	G31	scaffold360	PEPC-3	scaffold263	LG9-10	E-AAGXM-CAT13	LG9-10	S1565
866	LG9-11	F5-202	scaffold72	1405726|12348338	scaffold366	PEPC-4		LG9-11	S382_Wu	LG9-11	E-AAGXM-CAT12
867	LG9-12	E0072-11	scaffold72	1400140|12295198	scaffold366	PEPC-5		LG9-12	S174_Wu	LG9-12	S5733
868	LG9-13	E0072-10	scaffold72	1402848|12356173	scaffold733	eSNP0963	scaffold949	LG9-13	E-ACTXM-CTA01	LG9-13	S4432
869	LG9-14	E0872-5	scaffold872	1402469|12272349	scaffold733	PEPC-1		LG9-14	E-AAGXM-CAT07	LG9-14	S978
870	LG9-15	E0872-6	scaffold872	1404077|12344912	scaffold2	PEPC-2		LG9-15	S1210_Wu	LG9-15	S1952
871	LG9-16	F4-20	scaffold872	G122_locus1	scaffold872	Jcuint138	scaffold360	LG9-16	S366_Wu	LG9-16	S6679
872	LG9-17	E0872-7	scaffold872	1408478|12317739	scaffold872	SNP006-1	scaffold698	LG9-17	S733_Wu	LG9-17	S10
873	LG9-18	E0872-3	scaffold872	SNP14384	scaffold872	SNP006-2		LG9-18	S39_Wu	LG9-18	S19
874	LG9-19	E0872-2	scaffold872	1404870|12351781	scaffold72	SNP006-3		LG9-19	S759_Wu	LG9-19	E-ACAXM-CTG04
875	LG9-20	E0002-2	scaffold2	G8	scaffold815	SNP006-4		LG9-20	S285_Wu	LG9-20	S56
876	LG9-21	E0002-11	scaffold2			SNP006-5		LG9-21	S150_Wu	LG9-21	W_Jatr698
877	LG9-22	E0002-3b	scaffold2			Jatr1007	scaffold360	LG9-22	S22_Wu	LG9-22	S2186
878	LG9-23	E0002-4b	scaffold2			Jcuint166	scaffold360	LG9-23	S1033_Wu	LG9-23	S998
879	LG9-24	E0002-6	scaffold2			Jcuint228	scaffold360	LG9-24	S242_Wu	LG9-24	S2545
880	LG9-25	E0002-10	scaffold2			eSNP0938	scaffold360	LG9-25	S173_Wu	LG9-25	S6273
881	LG9-26	E0002-15	scaffold2			Jcuint010	scaffold898	LG9-26	S103_Wu	LG9-26	S783
882	LG9-27	E0002-13	scaffold2			Jatr903	scaffold898	LG9-27	S175_Wu	LG9-27	S8160
883	LG9-28	X9-3	scaffold799			eSNP0920	scaffold617	LG9-28	S413_Wu	LG9-28	S128
884	LG9-29	E0223-2	scaffold223			Jatr698	scaffold617	LG9-29	E-AACXM-CTA11	LG9-29	S5453
885	LG9-30	E0002-5b	scaffold2			KASIII-1	scaffold660	LG9-30	S1369_Wu	LG9-30	S1733
886	LG9-31	E0388-2	scaffold388			KASIII-2		LG9-31	S70_Wu	LG9-31	S7479
887	LG9-32	E0388-1	scaffold388			eSNP0180	scaffold660	LG9-32	E-ACTXM-CAT08	LG9-32	S2112
888	LG9-33	E0002-5a	scaffold2			eSNP0833	scaffold660	LG9-33	S898_Wu	LG9-33	S855
889	LG9-34	E0413-1	scaffold413			eSNP0138	scaffold660	LG9-34	S2_Wu	LG9-34	S570
890	LG9-35	E0039-1	scaffold39			Jatr324	scaffold660	LG9-35	S388_Wu	LG9-35	S7224
891	LG9-36	E0223-4	scaffold223			Jatr140	scaffold660	LG9-36	S223_Wu	LG9-36	S1934
892	LG9-37	E0173-1	scaffold173					LG9-37	E-ACAXM-CAT10	LG9-37	S903
893	LG9-38	E0223-5	scaffold223					LG9-38	S872_Wu	LG9-38	S71
894	LG9-39	E0725	scaffold725					LG9-39	S72_Wu	LG9-39	S409
895	LG9-40	E0353-2	scaffold353					LG9-40	E-ACTXM-CTA12	LG9-40	S844
896	LG9-41	E0171-1	scaffold171					LG9-41	E-AACXM-CAG03	LG9-41	S4105
897	LG9-42	E0175-1	scaffold175					LG9-42	S815_Wu	LG9-42	S8559
898	LG9-43	SNP0382-1	scaffold382					LG9-43	E-ACTXM-CTA06	LG9-43	S10051
899	LG9-44	E0351-1	scaffold351							LG9-44	S150
900	LG9-45	E0351-2	scaffold351							LG9-45	S4418
901	LG9-46	E0629	scaffold629							LG9-46	S2034
902	LG9-47	SNP0434-1	scaffold434							LG9-47	S13254
903	LG9-48	E0173-4	scaffold173							LG9-48	S97
904	LG9-49	E0325-1	scaffold325							LG9-49	S1002
905	LG9-50	E0313-1	scaffold313							LG9-50	S85
906	LG9-51	E0070-1	scaffold70							LG9-51	E-ACTXM-CTG06
907	LG9-52	E0631	scaffold631							LG9-52	S96
908	LG9-53	E1369-1	scaffold1369							LG9-53	S768
909	LG9-54	E0949-3	scaffold949							LG9-54	S151
910	LG9-55	E0174-1	scaffold174							LG9-55	S108
911	LG9-56	SNP0584-1	scaffold584							LG9-56	S4506
912	LG9-57	E0157-1	scaffold157							LG9-57	S4588
913	LG9-58	E0103-2	scaffold103							LG9-58	E-ACTXM-CTG04
914	LG9-59	E0556-1	scaffold556
915	LG9-60	E0487-1	scaffold487
916	LG9-61	E0487-2	scaffold487
917	LG9-62	E0263-1	scaffold263
918	LG9-63	E0782-1	scaffold782
919	LG9-64	E0949-2	scaffold949
920	LG9-65	E0351-3	scaffold351
921	LG9-66	E0801-2	scaffold801
922	LG9-67	E0543-1	scaffold543
923	LG9-68	E1199	scaffold1199
924	LG9-69	E0103-1	scaffold103
925	LG9-70	F1-66	scaffold103
926	LG9-71	E0680-3	scaffold680
927	LG9-72	E0261-1	scaffold261
928	LG9-73	E0285-3	scaffold285
929	LG9-74	F2-7	scaffold629
930	LG9-75	E0150-1	scaffold150
931	LG9-76	SNP0698	scaffold698
932	LG9-77	F4-93	scaffold22
933	LG9-78	E0022-2	scaffold22
934	LG9-79	F1-97	scaffold325
935	LG9-80	E0966-1	scaffold966
936	LG9-81	E0242-1	scaffold242
937	LG9-82	E0103-4	scaffold103
938	LG9-83	E0698-1r	scaffold698
939	LG9-84	E0285-7	scaffold285
940	LG9-85	E0680-1	scaffold680
941	LG9-86	E0285-4	scaffold285
942	LG9-87	E0733-1	scaffold733
943	LG9-88	E0733-5	scaffold733
944	LG9-89	E0366-3	scaffold366
945	LG9-90	E0366-7	scaffold366
946	LG9-91	E0366-6	scaffold366
947	LG9-92	E0733-4	scaffold733
948	LG9-93	E0733-2	scaffold733
949	LG9-94	E1210-6	scaffold1210
950	LG9-95	E1210-5	scaffold1210
951	LG9-96	E1210-4	scaffold1210
952	LG9-97	E1210-1	scaffold1210
953	LG9-98	E1210-3	scaffold1210
954	LG9-99	E1210-7	scaffold1210
955	LG9-100	X9-5	scaffold360
956	LG9-101	X9-7	scaffold360
957	LG9-102	X9-6	scaffold360
958	LG9-103	X9-9	scaffold898
959	LG9-104	F1-104	scaffold898
960	LG9-105	E0617-10	scaffold617
961	LG9-106	E0617-2	scaffold617
962	LG9-107	E0617-8	scaffold617
963	LG9-108	E0137-2	scaffold137
964	LG9-109	F2-53	scaffold137
965	LG9-110	F2-52	scaffold617
966	LG9-111	E0617-1	scaffold617
967	LG9-112	E0617-4	scaffold617
968	LG9-113	X9-10	scaffold617
969	LG9-114	E0137-1	scaffold137
970	LG9-115	E0660-17	scaffold660
971	LG9-116	E0137-8	scaffold137
972	LG9-117	F5-141	scaffold137
973	LG9-118	X9-2	scaffold660
974	LG9-119	F5-161	scaffold137
975	LG9-120	E0137-7	scaffold137
976	LG9-121	E0137-5	scaffold137
977	LG9-122	E0137-6	scaffold137
978	LG9-123	E0137-9	scaffold137
979	LG9-124	E0660-14	scaffold660
980	LG9-125	E0660-2	scaffold660
981	LG9-126	E0660-7	scaffold660
982	LG9-127	E0660-13	scaffold660
983	LG9-128	E0660-6	scaffold660
984	LG9-129	E0660-3	scaffold660
985	LG9-130	E0660-15	scaffold660
986	LG9-131	X9-11	scaffold660
987	LG9-132	E0660-9	scaffold660
	Linkage Group	Marker	The anchored scaffold	Marker	The anchored scaffold	Marker	The anchored scaffold	Linkage Group	Marker	Linkage Group	Marker
988	LG10-1	E1735-1	scaffold1735	Jcuint152	scaffold11	SNP3FAD-4	scaffold11	LG10-1	S805_Wu	LG10-1	E-ACAXM-CTG03
989	LG10-2	E1735-4	scaffold1735	1413257|12306544	scaffold11	SNP3FAD-2	scaffold11	LG10-2	E-ACAXM-CTG03	LG10-2	S1296
990	LG10-3	E1735-2	scaffold1735	1413255|12304740	scaffold11	SNP3FAD-3		LG10-3	S1735_Wu	LG10-3	S2165
991	LG10-4	X10-14	scaffold48	1403415|12338032	scaffold11	eSNP0048	scaffold11	LG10-4	E-ACAXM-CAT11	LG10-4	S10758
992	LG10-5	E0048-13	scaffold48	1398261|12342544	scaffold20	Jatr627	scaffold11	LG10-5	S48_Wu	LG10-5	S13021
993	LG10-6	E0048-4	scaffold48	1408361|12318547	scaffold20	Jcuint152	scaffold11	LG10-6	S165_Wu	LG10-6	S6599
994	LG10-7	E0048-8	scaffold48	SNP11190	scaffold20	eSNP0251	scaffold11	LG10-7	S104_Wu	LG10-7	S1861
995	LG10-8	F1-18	scaffold48	1406404|12350001	scaffold20	eSNP0063	scaffold11	LG10-8	S539_Wu	LG10-8	S113
996	LG10-9	E0048-7	scaffold48	JCT27	scaffold227	eSNP0217	scaffold63	LG10-9	S265_Wu	LG10-9	S6500
997	LG10-10	E0048-1	scaffold48	G23	scaffold133	eSNP0125	scaffold63	LG10-10	S266_Wu	LG10-10	S1665
998	LG10-11	E0048-10	scaffold48	G75	scaffold333	eSNP0150	scaffold53	LG10-11	S210_Wu	LG10-11	S1026
999	LG10-12	E0048-5	scaffold48	SNP11955	scaffold47	eSNP0830	scaffold464	LG10-12	S47_Wu	LG10-12	S2010
1000	LG10-13	F5-225	scaffold48	AG446	scaffold210	Jcuint180	scaffold464	LG10-13	S1769_Wu	LG10-13	S2870
1001	LG10-14	F1-1	scaffold165	1401891|12346378	scaffold266	eSNP0912	scaffold281	LG10-14	S357_Wu	LG10-14	S2626
1002	LG10-15	E0104-12	scaffold104	1409578|12326821	scaffold266	Jcuint081	scaffold528	LG10-15	S45_Wu	LG10-15	S18000
1003	LG10-16	E0104-3	scaffold104	1417938|12274325	scaffold539	Jcuint131	scaffold281	LG10-16	S80_Wu	LG10-16	S5289
1004	LG10-17	E0104-9	scaffold104	1403160|12269870	scaffold84	Jcuint325	scaffold528	LG10-17	E-AACXM-CTA03	LG10-17	S14422
1005	LG10-18	E0104-2	scaffold104	1403303|12355936	scaffold84	Jcuint066	scaffold1117	LG10-18	S1304_Wu	LG10-18	S6908
1006	LG10-19	E0104-10	scaffold104	1407411|12344004	scaffold104	Jcuint067	scaffold1114	LG10-19	S797_Wu	LG10-19	S540
1007	LG10-20	E0104-4	scaffold104	1402908|12355624	scaffold104	eSNP0098	scaffold7	LG10-20	S557_Wu	LG10-20	S254
1008	LG10-21	E0104-13	scaffold104	1405038|12349255	scaffold104	SNP004-1	scaffold47	LG10-21	S133_Wu	LG10-21	S333
1009	LG10-22	E0539-1	scaffold539	1399325|12313920	scaffold104	eSNP0073	scaffold45	LG10-22	S110_Wu	LG10-22	S1071
1010	LG10-23	E0539-5	scaffold539	1408105|12313702	scaffold104	Jcuint158	scaffold47	LG10-23	S532_Wu	LG10-23	S2513
1011	LG10-24	E0539-4	scaffold84	1418115|12269988	scaffold104	eSNP0121	scaffold47	LG10-24	S1184_Wu	LG10-24	S977
1012	LG10-25	X10-12	scaffold539	1406818|12348267	scaffold104	Jcuint059	scaffold47	LG10-25	S544_Wu	LG10-25	S1421
1013	LG10-26	E0539-3	scaffold539	1397950|12352027	scaffold104	Jcuint270	scaffold889	LG10-26	S1114_Wu	LG10-26	S9090
1014	LG10-27	E0539-2	scaffold539	1409262|12312967	scaffold104	Jcuint155	scaffold84	LG10-27	S7_Wu	LG10-27	S5700
1015	LG10-28	E0266-4a	scaffold266	1403590|12341424	scaffold165	eSNP0827	scaffold807	LG10-28	S400_Wu	LG10-28	S331
1016	LG10-29	E0266-5	scaffold266	1408916|12316394	scaffold165	eSNP0877	scaffold165	LG10-29	S91_Wu	LG10-29	S525
1017	LG10-30	E0266-3	scaffold266	1399607|12306973	scaffold165	eSNP0214	scaffold165	LG10-30	S275_Wu	LG10-30	S430
1018	LG10-31	E0266-1	scaffold266	1407394|12331665	scaffold48	eSNP0293	scaffold48	LG10-31	S20_Wu	LG10-31	S6539
1019	LG10-32	E0266-2	scaffold266	1409013|12266867	scaffold48	Jatr667	scaffold48	LG10-32	S528_Wu	LG10-32	S2095
1020	LG10-33	SNP0210-3	scaffold210	1403036|12347501	scaffold48	Jatr299	scaffold48	LG10-33	S281_Wu	LG10-33	S10011
1021	LG10-34	X10-11	scaffold889	1409209|12327700	scaffold48	Jatr153	scaffold473	LG10-34	S397_Wu	LG10-34	S2004
1022	LG10-35	X10-8	scaffold1114	1409142|12314190	scaffold48	Jcuint039	scaffold165	LG10-35	S63_Wu	LG10-35	S8629
1023	LG10-36	E0045-5	scaffold45	1407714|12337831	scaffold48			LG10-36	S387_Wu	LG10-36	S7359
1024	LG10-37	E0045-3	scaffold45					LG10-37	S931_Wu	LG10-37	S365
1025	LG10-38	E0007-6	scaffold7					LG10-38	S464_Wu	LG10-38	S4098
1026	LG10-39	E0007-4	scaffold7					LG10-39	E-ACAXM-CAT06	LG10-39	S17185
1027	LG10-40	E0007-3a	scaffold7					LG10-40	S11_Wu	LG10-40	S2280
1028	LG10-41	E0797-3	scaffold797					LG10-41	E-AACXM-CTA10	LG10-41	S5577
1029	LG10-42	E0691-r2	scaffold691					LG10-42	E-AAGXM-CAT05	LG10-42	S19703
1030	LG10-43	E0824-1	scaffold824					LG10-43	E-AACXM-CAT01a	LG10-43	S5414
1031	LG10-44	E0824-2	scaffold824					LG10-44	E-AACXM-CTA10a	LG10-44	S3830
1032	LG10-45	E0133-2	scaffold133					LG10-45	E-AACXM-CAT01	LG10-45	S1188
1033	LG10-46	F4-87	scaffold133					LG10-46	S1365_Wu	LG10-46	S9302
1034	LG10-47	E0532-2	scaffold532					LG10-47	E-AACXM-CTA04	LG10-47	S4684
1035	LG10-48	E0532-1	scaffold532					LG10-48	E-AACXM-CTA13	LG10-48	S350
1036	LG10-49	E0110-4	scaffold110							LG10-49	S1073
1037	LG10-50	E0110-6	scaffold110							LG10-50	S4809
1038	LG10-51	E0544-1	scaffold544							LG10-51	S798
1039	LG10-52	F2-68	scaffold110							LG10-52	E-ACAXM-CAT06
1040	LG10-53	X10-10	scaffold47							LG10-53	S1164
1041	LG10-54	E0691-r1	scaffold691							LG10-54	S14146
1042	LG10-55	E0270-1	scaffold270							LG10-55	S11638
1043	LG10-56	E0110-2	scaffold110							LG10-56	E-AACXM-CTA10a
1044	LG10-57	E0400-1	scaffold400							LG10-57	S4072
1045	LG10-58	E0797-5	scaffold797							LG10-58	S1751
1046	LG10-59	E0797-6	scaffold797							LG10-59	S73
1047	LG10-60	E0797-1	scaffold797							LG10-60	S5675
1048	LG10-61	F4-84	scaffold7
1049	LG10-62	SNP0571-1	scaffold571
1050	LG10-63	E0133-3	scaffold133
1051	LG10-64	E0110-5	scaffold110
1052	LG10-65	E0110-7	scaffold110
1053	LG10-66	X10-7	scaffold1117
1054	LG10-67	E0745	scaffold745
1055	LG10-68	E0357-1	scaffold357
1056	LG10-69	E0642-3	scaffold642
1057	LG10-70	E0080-3	scaffold80
1058	LG10-71	E0080-2	scaffold80
1059	LG10-72	E0557-1	scaffold557
1060	LG10-73	E0557-3	scaffold557
1061	LG10-74	E0091-3	scaffold91
1062	LG10-75	SNP0195-1	scaffold195
1063	LG10-76	E0275-1	scaffold275
1064	LG10-77	E0281-3	scaffold281
1065	LG10-78	E0281-2	scaffold281
1066	LG10-79	E0281-1	scaffold281
1067	LG10-80	SNP0387-1	scaffold387
1068	LG10-81	E528-1	scaffold528
1069	LG10-82	E0528-5	scaffold528
1070	LG10-83	E0227-4	scaffold227
1071	LG10-84	E0020-1	scaffold20
1072	LG10-85	E0020-2	scaffold20
1073	LG10-86	E528-4	scaffold528
1074	LG10-87	E0397-1	scaffold397
1075	LG10-88	F5-194	scaffold794
1076	LG10-89	E0794-4	scaffold794
1077	LG10-90	E0794-1	scaffold794
1078	LG10-91	E0053-1	scaffold794
1079	LG10-92	E0794-2	scaffold794
1080	LG10-93	E0794-3	scaffold53
1081	LG10-94	E0794-5	scaffold53
1082	LG10-95	E0063-4	scaffold53
1083	LG10-96	F2-33	scaffold63
1084	LG10-97	E0063-1	scaffold63
1085	LG10-98	E0063-5	scaffold63
1086	LG10-99	E0063-2	scaffold63
1087	LG10-100	X10-3	scaffold464
1088	LG10-101	E0464-3	scaffold464
1089	LG10-102	E0464-6	scaffold464
1090	LG10-103	E0464-2	scaffold464
1091	LG10-104	F5-248	scaffold464
1092	LG10-105	E0011-17	scaffold11
1093	LG10-106	E0011-13	scaffold11
1094	LG10-107	E0011-6	scaffold11
1095	LG10-108	E0011-5	scaffold11
1096	LG10-109	E0011-3	scaffold11
1097	LG10-110	E0011-10	scaffold11
1098	LG10-111	E0011-2	scaffold11
1099	LG10-112	F5-209	scaffold11
1100	LG10-113	E0011-16	scaffold11
1101	LG10-114	F1-77	scaffold11
1102	LG10-115	E0011-12	scaffold11
1103	LG10-116	E0011-7	scaffold11
1104	LG10-117	E0011-18	scaffold11
1105	LG10-118	E0011-9	scaffold11
1106	LG10-119	E0011-11b	scaffold11
1107	LG10-120	F5-135	scaffold11
1108	LG10-121	E0011-11a	scaffold11
1109	LG10-122	X10-2	scaffold11
1110	LG10-123	X10-1	scaffold11
1111	LG10-124	F5-298	scaffold1365
1112	LG10-125	E1365-8	scaffold1365
1113	LG10-126	E1365-10	scaffold1365
1114	LG10-127	E1365-7	scaffold1365
1115	LG10-128	E1365-9	scaffold1365
1116	LG10-129	E1365-11	scaffold1365
1117	LG10-130	E1365-12	scaffold1365
1118	LG10-131	E1365-6	scaffold1365
1119	LG10-132	E1365-2	scaffold1365
1120	LG10-133	E1365-1	scaffold1365
1121	LG10-134	E1365-4	scaffold1365
	Linkage Group	Marker	The anchored scaffold	Marker	The anchored scaffold	Marker	The anchored scaffold	Linkage Group	Marker	Linkage Group	Marker
1122	LG11-1	X11-2	scaffold211	1402580|12360363	scaffold211	eSNP0213	scaffold211	LG11-1	S1132_Wu	LG11-1	S785
1123	LG11-2	X11-3	scaffold211	1406898|12347553	scaffold211	eSNP0051	scaffold211	LG11-2	S438_Wu	LG11-2	S1884
1124	LG11-3	X11-4	scaffold211	G91	scaffold211	eSNP0936	scaffold211	LG11-3	S330_Wu	LG11-3	S1567
1125	LG11-4	X11-1	scaffold211	1398498|12333756	scaffold211	Jcuint044	scaffold211	LG11-4	E-ACTXM-CAT03	LG11-4	S21
1126	LG11-5	F4-74	scaffold211	SNP6734	scaffold211	Jatr391	scaffold211	LG11-5	E-AACXM-CAT12	LG11-5	S1215
1127	LG11-6	X11-7	scaffold211	SNP19645	scaffold211	Jatr897	scaffold211	LG11-6	S365_Wu	LG11-6	S758
1128	LG11-7	X11-5	scaffold211	1406155|12338501	scaffold211	DGAT1-1	scaffold211	LG11-7	S77_Wu	LG11-7	S5
1129	LG11-8	E0153-9	scaffold153	1398403|12334674	scaffold211	DGAT1-2		LG11-8	S276_Wu	LG11-8	S5166
1130	LG11-9	E0153-8	scaffold153	1408521|12269229	scaffold211	DGAT1-3		LG11-9	S1360_Wu	LG11-9	S11084
1131	LG11-10	E0153-3	scaffold153	1408820|12319740	scaffold211	DGAT1-4		LG11-10	S613_Wu	LG11-10	S136
1132	LG11-11	E0153-15	scaffold153	1417516|12278287	scaffold211	DGAT1-5		LG11-11	S135_Wu	LG11-11	S1101
1133	LG11-12	E0153-6	scaffold153	G82	scaffold211	KAS-II-10	scaffold211	LG11-12	S16_Wu	LG11-12	S811
1134	LG11-13	E0153-13	scaffold153	1407890|12342847	scaffold211	KAS-II-11		LG11-13	E-AAGXM-CAT08	LG11-13	S87
1135	LG11-14	E0153-16	scaffold153	Jcuint020	scaffold211	KAS-II-12		LG11-14	S466_Wu	LG11-14	S8601
1136	LG11-15	E0153-10	scaffold153	G33	scaffold211	KAS-II-13		LG11-15	S1045_Wu	LG11-15	S297
1137	LG11-16	E0153-2	scaffold153	NT2	scaffold211	KAS-II-2		LG11-16	S218_Wu	LG11-16	S620
1138	LG11-17	E0153-4	scaffold153	EST02	scaffold211	KAS-II-3		LG11-17	S693_Wu	LG11-17	S10460
1139	LG11-18	E0153-14	scaffold153	1402893|12349739	scaffold153	KAS-II-4		LG11-18	S690_Wu	LG11-18	E-ACTXM-CAT04
1140	LG11-19	E0153-5	scaffold153	G28	scaffold153	KAS-II-5		LG11-19	S336_Wu	LG11-19	S1030
1141	LG11-20	E0153-7	scaffold153	SNP8281	scaffold153	KAS-II-6		LG11-20	S141_Wu	LG11-20	E-AACXM-CAT12
1142	LG11-21	E0153-17	scaffold153	AG306_locus2	scaffold153	KAS-II-7		LG11-21	S75_Wu	LG11-21	S9138
1143	LG11-22	E0153-1	scaffold153	SNP15949	scaffold153	KAS-II-8		LG11-22	S645_Wu	LG11-22	S3927
1144	LG11-23	E0153-11	scaffold153	SNP16906	scaffold488	KAS-II-9		LG11-23	S974_Wu	LG11-23	S11241
1145	LG11-24	X11-9	scaffold488	1408910|12330668	scaffold488	KAS-II-1		LG11-24	S331_Wu	LG11-24	S1957
1146	LG11-25	E0488-9	scaffold488	1410440|12313771	scaffold488	Jcuint020	scaffold211	LG11-25	S177_Wu	LG11-25	S1289
1147	LG11-26	E0488-10	scaffold488	1408331|12322572	scaffold488	D8SPDE-1	scaffold211	LG11-26	S240_Wu	LG11-26	S7235
1148	LG11-27	E0488-11	scaffold488	1398472|12334476	scaffold488	D8SPDE-2		LG11-27	S488_Wu	LG11-27	S5986
1149	LG11-28	E0488-4	scaffold488	1410298|12316502	scaffold488	D8SPDE-3		LG11-28	S890_Wu	LG11-28	S3900
1150	LG11-29	E0488-5	scaffold488	1400642|12357559	scaffold488	D8SPDE-4		LG11-29	S713_Wu	LG11-29	S7919
1151	LG11-30	F1-42	scaffold488	EST12_locus1	scaffold488	D8SPDE-5		LG11-30	E-AAGXM-CAT09	LG11-30	S27044
1152	LG11-31	E0645-7	scaffold645	EST18	scaffold488	eSNP0057	scaffold211	LG11-31	S394_Wu	LG11-31	S299
1153	LG11-32	E0645-2	scaffold645	1400708|12283708	scaffold177	eSNP0829	scaffold211	LG11-32	E-ACTXM-CAT04	LG11-32	S15726
1154	LG11-33	E0488-7	scaffold488	1409922|12319549	scaffold141	eSNP0879	scaffold211	LG11-33	S437_Wu	LG11-33	S8463
1155	LG11-34	E0645-4	scaffold645	1402304|12331410	scaffold974	SNP054-4	scaffold211	LG11-34	S153_Wu	LG11-34	S1750
1156	LG11-35	E0488-2	scaffold488	1410290|12298973	scaffold739	SNP054-5		LG11-35	S435_Wu	LG11-35	S8119
1157	LG11-36	E0645-6	scaffold645	1398998|12324489	scaffold739	SNP054-6		LG11-36	W_Jatr684	LG11-36	S8740
1158	LG11-37	F2-35	scaffold177	1399615|12306996	scaffold305	SNP054-3		LG11-37	E-AAGXM-CAT04	LG11-37	S16319
1159	LG11-38	X11-8	scaffold177	1408519|12339715	scaffold969 21.7	Jatr363	scaffold211	LG11-38	E-ACAXM-CAT07	LG11-38	S1032
1160	LG11-39	E0645-8	scaffold645	AG19	multiple hits-locus	Jcuint150	scaffold211	LG11-39	W_Jcuint020	LG11-39	S3654
1161	LG11-40	E0645-5	scaffold645	1413454|12272227	scaffold16	SNP054-1	scaffold211	LG11-40	S211_Wu	LG11-40	S9974
1162	LG11-41	E0645-9	scaffold645	1406142|12346968	scaffold276	SNP054-2		LG11-41	E-ACAXM-CAT03	LG11-41	S1919
1163	LG11-42	E0739	scaffold739	1398266|12342590	scaffold276	Jatr377	scaffold211			LG11-42	S645
1164	LG11-43	E0974-2	scaffold974	1400045|12309767	scaffold276	6FAD-1	scaffold153			LG11-43	S846
1165	LG11-44	E0141-3	scaffold141	SNP3417	scaffold240	6FAD-2				LG11-44	S6527
1166	LG11-45	E0974-3	scaffold974	SNP13044	scaffold240	6FAD-3				LG11-45	S3168
1167	LG11-46	E0867-2	scaffold867	1403321|12268961	scaffold1132	6FAD-4				LG11-46	S4431
1168	LG11-47	SNP01360	scaffold1360	1416293|12282315	scaffold1132	6FAD-5				LG11-47	S2260
1169	LG11-48	E0940	scaffold940	1409702|12328811	scaffold240	6FAD-6				LG11-48	S1661
1170	LG11-49	SNP0394-1	scaffold394	1411687|12281027	scaffold240	6FAD-7				LG11-49	S2825
1171	LG11-50	SNP0305-3	scaffold305	1399807|12313305	scaffold77	eSNP0260	scaffold141			LG11-50	S3326
1172	LG11-51	E0455-1	scaffold455	1408106|12342064	scaffold365	eSNP0042	scaffold466			LG11-51	S7531
1173	LG11-52	SNP0458-2	scaffold458	G101	scaffold325	eSNP0052	scaffold690			LG11-52	S2068
1174	LG11-53	SNP0273-4	scaffold273	1401633|12276653	scaffold365	eSNP0854	scaffold177			LG11-53	S2555
1175	LG11-54	E0292-1	scaffold292	1409859|12321176	scaffold365	Jatr825	scaffold177			LG11-54	S1686
1176	LG11-55	SNP0336-2	scaffold336	Jatr999	scaffold365	Jatr684	scaffold488			LG11-55	S5852
1177	LG11-56	E0969	scaffold969	1407190|12332646	scaffold365	Jatr362	scaffold75			LG11-56	S5086
1178	LG11-57	E0218-3	scaffold218	1400651|12361653	scaffold365	Jcuint042	scaffold466			LG11-57	S11823
1179	LG11-58	E0218-1	scaffold218			eSNP0074	scaffold613			LG11-58	S1011
1180	LG11-59	E0458-2	scaffold458			eSNP0851	scaffold276			LG11-59	S7995
1181	LG11-60	E0690-r1	scaffold690			eSNP0219	scaffold77			LG11-60	S4708
1182	LG11-61	E0690-r2	scaffold690			FATB-2	scaffold365			LG11-61	S7341
1183	LG11-62	E0466-1	scaffold466			FATB-3				LG11-62	S3024
1184	LG11-63	SNP0305-4r	scaffold305			FATB-4				LG11-63	S453
1185	LG11-64	E0437-1	scaffold437			eSNP0258	scaffold365			LG11-64	S4093
1186	LG11-65	SNP0377-1	scaffold377			FATB-1	scaffold365			LG11-65	S2847
1187	LG11-66	E0092-1	scaffold92			Jatr640	scaffold365			LG11-66	S2431
1188	LG11-67	SNP0121-2	scaffold121			Jatr306	scaffold240			LG11-67	S8593
1189	LG11-68	E0016-3	scaffold16			eSNP0931	scaffold365			LG11-68	S12473
1190	LG11-69	E0702	scaffold702			Jatr229	scaffold365			LG11-69	S1570
1191	LG11-70	E0016-4	scaffold16			Jatr154	scaffold365			LG11-70	S5363
1192	LG11-71	E0276-1	scaffold276			Jatr719	scaffold365			LG11-71	S1673
1193	LG11-72	E0135-2	scaffold135			Jatr999	scaffold365			LG11-72	S4575
1194	LG11-73	E0613-4	scaffold613			Jcuint323	scaffold365			LG11-73	S4179
1195	LG11-74	E0613-3	scaffold613							LG11-74	S1662
1196	LG11-75	E0016-1	scaffold16							LG11-75	S290
1197	LG11-76	F5-278	scaffold135							LG11-76	S29
1198	LG11-77	E0276-3	scaffold276							LG11-77	S234
1199	LG11-78	E0276-2	scaffold276							LG11-78	E-AAGXM-CAT09
1200	LG11-79	E0240-8	scaffold240							LG11-79	S4591
1201	LG11-80	E0240-4	scaffold240							LG11-80	S857
1202	LG11-81	E0240-7	scaffold240							LG11-81	S13205
1203	LG11-82	E0240-1	scaffold240							LG11-82	S1005
1204	LG11-83	E0077-5	scaffold77
1205	LG11-84	E1132	scaffold1132
1206	LG11-85	F5-252	scaffold77
1207	LG11-86	X11-17	scaffold365
1208	LG11-87	X11-14	scaffold365
