# Supplementary material for: Ultra-High-Density Genetic Maps of Jatropha curcas × Jatropha integerrima and Anchoring Jatropha curcas Genome Assembly Scaffolds
Source: MDPI journal article supplement (doi:10.3390/f14091907), 2023-09-19
Supplement: s1 [file s1 › Supplementary Table S8.pdf]

**Supplementary Table S8.** List of 134 scaffolds of Wu\_JatCur\_1.0 mapped/anchored first time on linkage groups

| No. | Scaffold_ID |
|-----|-------------|
| 1   | S1002_Wu    |
| 2   | S1005_Wu    |
| 3   | S101_Wu     |
| 4   | S102_Wu     |
| 5   | S1033_Wu    |
| 6   | S1036_Wu    |
| 7   | S1045_Wu    |
| 8   | S1055_Wu    |
| 9   | S1056_Wu    |
| 10  | S1074_Wu    |
| 11  | S1078_Wu    |
| 12  | S1081_Wu    |
| 13  | S1103_Wu    |
| 14  | S1106_Wu    |
| 15  | S1114_Wu    |
| 16  | S1121_Wu    |
| 17  | S1122_Wu    |
| 18  | S1132_Wu    |
| 19  | S1137_Wu    |
| 20  | S1149_Wu    |
| 21  | S1168_Wu    |
| 22  | S1173_Wu    |
| 23  | S1174_Wu    |
| 24  | S1184_Wu    |
| 25  | S1198_Wu    |
| 26  | S1210_Wu    |
| 27  | S1250_Wu    |
| 28  | S1266_Wu    |
| 29  | S1286_Wu    |
| 30  | S1296_Wu    |
| 31  | S1304_Wu    |
| 32  | S1327_Wu    |
| 33  | S1334_Wu    |
| 34  | S1360_Wu    |
| 35  | S1365_Wu    |
| 36  | S1369_Wu    |
| 37  | S1376_Wu    |

| No. | Scaffold_ID |
|-----|-------------|
| 38  | S1445_Wu    |
| 39  | S1457_Wu    |
| 40  | S147_Wu     |
| 41  | S1514_Wu    |
| 42  | S1559_Wu    |
| 43  | S1565_Wu    |
| 44  | S1579_Wu    |
| 45  | S1719_Wu    |
| 46  | S1735_Wu    |
| 47  | S1762_Wu    |
| 48  | S1769_Wu    |
| 49  | S1781_Wu    |
| 50  | S1855_Wu    |
| 51  | S1936_Wu    |
| 52  | S1969_Wu    |
| 53  | S1991_Wu    |
| 54  | S2033_Wu    |
| 55  | S2166_Wu    |
| 56  | S229_Wu     |
| 57  | S2362_Wu    |
| 58  | S257_Wu     |
| 59  | S262_Wu     |
| 60  | S265_Wu     |
| 61  | S2654_Wu    |
| 62  | S2976_Wu    |
| 63  | S314_Wu     |
| 64  | S330_Wu     |
| 65  | S385_Wu     |
| 66  | S395_Wu     |
| 67  | S404_Wu     |
| 68  | S41_Wu      |
| 69  | S435_Wu     |
| 70  | S438_Wu     |
| 71  | S470_Wu     |
| 72  | S471_Wu     |
| 73  | S477_Wu     |
| 74  | S479_Wu     |

| No. | Scaffold_ID |
|-----|-------------|
| 75  | S482_Wu     |
| 76  | S484_Wu     |
| 77  | S520_Wu     |
| 78  | S552_Wu     |
| 79  | S568_Wu     |
| 80  | S593_Wu     |
| 81  | S594_Wu     |
| 82  | S653_Wu     |
| 83  | S690_Wu     |
| 84  | S693_Wu     |
| 85  | S699_Wu     |
| 86  | S705_Wu     |
| 87  | S708_Wu     |
| 88  | S709_Wu     |
| 89  | S711_Wu     |
| 90  | S712_Wu     |
| 91  | S713_Wu     |
| 92  | S718_Wu     |
| 93  | S729_Wu     |
| 94  | S733_Wu     |
| 95  | S734_Wu     |
| 96  | S749_Wu     |
| 97  | S759_Wu     |
| 98  | S762_Wu     |
| 99  | S779_Wu     |
| 100 | S795_Wu     |
| 101 | S797_Wu     |
| 102 | S799_Wu     |
| 103 | S805_Wu     |
| 104 | S813_Wu     |
| 105 | S814_Wu     |
| 106 | S815_Wu     |
| 107 | S838_Wu     |
| 108 | S843_Wu     |
| 109 | S845_Wu     |
| 110 | S86_Wu      |
| 111 | S870_Wu     |

| No. | Scaffold_ID |
|-----|-------------|
| 12  | S872_Wu     |
| 113 | S878_Wu     |
| 114 | S890_Wu     |
| 115 | S897_Wu     |
| 116 | S898_Wu     |
| 117 | S903_Wu     |
| 118 | S905_Wu     |
| 119 | S906_Wu     |
| 120 | S907_Wu     |
| 121 | S913_Wu     |
| 122 | S925_Wu     |
| 123 | S930_Wu     |
| 124 | S931_Wu     |
| 125 | S941_Wu     |
| 126 | S944_Wu     |
| 127 | S948_Wu     |
| 128 | S956_Wu     |
| 129 | S958_Wu     |
| 130 | S974_Wu     |
| 131 | S975_Wu     |
| 132 | S976_Wu     |
| 133 | S983_Wu     |
| 134 | S984_Wu     |
